# Supplementary material for: The AUX1-AFB1-CNGC14 module establishes a longitudinal root surface pH profile
Source: eLife. 2023 Jul 14;12:e85193. doi: 10.7554/eLife.85193 (PMC10414970; doi:10.7554/eLife.85193)
Supplement: Figure 1—figure supplement 1—source data 1. [file elife-85193-fig1-figsupp1-data1.xlsx]

## Sheet: S1b
Wavel.	A1	A2	A3	A4	A5	A11	A12	C1	C2	C3	C4	C5	C11	C12	F1	F2	F3	F4	F5	F11	F12	H1	H2	H3	H4	H5	H11	H12
475	445	448	435	437	425	94	100	430	420	435	408	416	95	94	410	440	415	432	424	104	87	404	390	400	378	397	101	96
480	1010	1016	991	1015	978	14	15	1017	975	1004	963	985	14	16	970	990	951	972	956	15	15	904	878	907	862	901	15	15
485	2506	2425	2469	2466	2407	8	7	2506	2424	2508	2397	2445	9	9	2381	2452	2390	2435	2340	10	10	2236	2192	2220	2125	2205	8	9
490	5384	5328	5252	5294	5261	10	8	5396	5234	5389	5176	5283	9	8	5144	5275	5123	5256	5105	9	9	4855	4728	4777	4662	4762	9	9
495	10531	10682	10591	10597	10500	10	9	10652	10552	10565	10453	10392	9	10	10474	10502	10508	10488	10361	10	10	9973	9873	9825	9816	9810	10	10
500	17925	17854	17975	18011	17803	12	11	18503	18209	18449	18127	17991	12	10	18663	18842	18599	18807	18511	11	11	18916	18837	18715	18584	18715	11	12
505	26208	26120	26281	25957	26148	12	11	27344	27127	26937	27008	26754	13	13	29298	29090	29044	28789	28853	12	11	31824	32066	31613	31672	31640	13	12
510	32605	32883	32649	32535	32544	13	13	34943	34544	34646	34363	34054	13	14	39224	38976	38999	38997	38481	12	13	47046	46610	46708	46303	46559	12	14
515	36541	36601	36496	36251	36443	12	14	39824	39225	39365	38910	38694	13	14	45836	45919	45665	45730	45288	12	12	58937	59178	59205	58918	59028	12	13
520	37565	37525	37473	37209	37369	10	12	40976	40515	40446	40360	39941	12	11	48212	48240	47839	47896	47655	12	13	64826	64938	64617	64511	64352	13	12
525	36355	36389	36312	36311	36103	13	12	39862	39256	39399	39186	38767	11	11	46915	46985	46615	46659	46380	13	12	63673	63945	63439	63514	63211	12	11
530	34641	34572	34825	34536	34533	12	13	37999	37376	37313	37230	36842	11	11	44275	44102	44004	43966	43681	10	11	59101	59455	59078	58867	58901	11	12
535	33288	33237	33311	33098	33138	13	13	35934	35531	35685	35393	35024	12	12	41488	41316	41324	41210	40900	14	13	54283	54203	54102	53697	53949	12	10
540	31945	32014	32049	31842	31958	12	13	34568	34014	33989	33806	33495	13	13	38831	38717	38607	38641	38336	14	11	49100	49255	49019	48681	48786	12	12
545	31005	30970	31068	30827	31025	11	12	33111	32712	32670	32571	32245	11	12	36669	36553	36538	36375	36092	12	12	44935	45100	44796	44773	44859	12	13
550	29515	29482	29616	29369	29353	12	11	31227	30896	31028	30777	30525	11	10	34333	34131	33970	34034	33771	8	11	40963	41006	40984	40686	40867	11	11
555	27715	27821	27823	27666	27595	10	11	29382	29076	28905	28949	28582	9	8	31718	31793	31580	31565	31443	9	10	37322	37418	37136	37207	37133	10	8
560	25538	25544	25617	25370	25528	7	8	26988	26642	26626	26488	26227	7	7	28994	29025	28942	28792	28776	7	9	33527	33684	33425	33454	33233	7	8
565	23245	23297	23423	23256	23111	7	7	24556	24141	24181	24150	23827	8	8	26006	26067	25998	25934	25806	7	9	29918	30037	29841	29777	29776	6	6
570	20754	20712	20746	20608	20621	6	8	21708	21362	21373	21347	21105	6	6	23035	23017	22971	22876	22755	8	7	26073	26111	25814	25879	25884	7	7
575	18278	18278	18265	18164	18256	7	4	19147	18824	19022	18803	18661	6	6	20081	20143	19950	20052	19806	5	6	22608	22609	22585	22302	22457	7	6
580	16169	16129	16124	16104	16082	5	6	16772	16613	16589	16546	16377	5	5	17587	17521	17592	17547	17490	7	6	19348	19488	19397	19277	19335	6	5
585	14341	14346	14377	14293	14312	5	5	14977	14716	14711	14648	14541	5	6	15479	15491	15422	15384	15269	6	5	16905	16875	16842	16745	16779	5	6
590	12705	12645	12627	12524	12622	5	6	13163	12977	12974	12859	12683	5	5	13539	13504	13456	13454	13453	5	4	14521	14610	14441	14400	14409	6	5
595	11308	11291	11298	11232	11213	5	4	11705	11552	11605	11531	11362	4	4	12064	11970	11943	11934	11935	5	5	12672	12757	12648	12678	12579	4	5
600	10201	10130	10204	10091	10088	4	3	10566	10406	10432	10329	10207	4	4	10778	10678	10736	10717	10644	4	4	11194	11277	11151	11156	11144	4	4
605	9196	9172	9237	9111	9152	4	4	9518	9377	9409	9393	9272	5	3	9655	9650	9622	9577	9544	5	5	9946	9996	9991	9916	9973	4	3
610	8373	8276	8406	8278	8329	4	4	8554	8523	8547	8429	8382	4	3	8736	8705	8694	8649	8616	4	4	8966	8921	8928	8862	8874	2	4
615	7448	7424	7462	7399	7385	4	3	7651	7500	7595	7509	7431	4	3	7721	7716	7722	7684	7647	4	3	7854	7952	7852	7765	7819	3	4
620	6665	6653	6650	6657	6702	2	4	6851	6745	6762	6739	6681	2	3	6876	6905	6864	6859	6831	3	3	6984	7039	6956	6921	6925	2	3
625	5883	5904	5915	5867	5875	3	3	6051	5997	5995	5936	5912	3	2	6137	6052	6092	6054	6076	3	2	6157	6148	6099	6125	6081	4	3
630	5196	5174	5211	5162	5179	3	3	5301	5261	5286	5214	5153	4	3	5370	5287	5330	5317	5289	2	2	5311	5339	5260	5308	5263	4	3
635	4591	4596	4580	4577	4568	3	3	4702	4668	4645	4634	4600	3	3	4727	4719	4649	4672	4664	2	2	4698	4699	4654	4672	4672	3	2
640	4045	3997	4066	4000	4036	2	3	4117	4098	4099	4047	4036	2	1	4137	4127	4078	4070	4100	3	3	4116	4111	4097	4070	4086	3	2
645	3544	3555	3565	3520	3538	3	2	3654	3580	3613	3557	3522	2	2	3630	3628	3624	3590	3588	2	4	3565	3545	3558	3533	3583	3	2
650	3146	3102	3106	3086	3124	3	1	3193	3159	3128	3147	3087	3	2	3165	3191	3197	3165	3139	3	2	3091	3124	3087	3047	3068	1	3

## Sheet: S1c
Wavel.	A1	A2	A3	A4	A5	A11	A12	C1	C2	C3	C4	C5	C11	C12	F1	F2	F3	F4	F5	F11	F12	H1	H2	H3	H4	H5	H11	H12			pH 4.5	A
420	201	209	174	139	169	204	263	179	163	179	166	209	249	257	168	210	183	182	172	251	211	229	209	212	191	185	276	271				B
425	8	9	8	8	10	12	18	10	9	9	15	8	15	15	10	10	10	9	10	17	15	11	11	11	11	8	17	18			pH 5.0	C
430	4	4	4	6	6	12	12	5	5	6	10	5	11	12	5	7	5	4	5	11	10	7	6	7	6	5	12	12				D
435	4	3	5	5	6	10	12	5	5	5	9	4	11	11	5	5	5	5	6	11	11	6	5	6	6	6	11	11				E
440	3	5	4	5	4	12	13	4	4	4	8	5	11	10	4	5	4	4	5	11	11	6	6	6	5	6	12	11			pH 5.5	F
445	3	5	5	5	6	12	13	6	4	5	7	4	12	12	4	7	4	4	4	12	11	6	5	6	5	5	13	12				G
450	4	6	7	6	7	11	13	4	6	5	7	6	9	13	5	6	5	5	5	12	11	6	6	6	5	5	13	10			pH 6.0	H
455	8	7	7	8	9	12	14	6	8	7	8	7	13	13	5	7	5	7	5	12	12	8	6	6	6	6	13	11
460	11	12	12	13	11	13	13	9	10	10	10	10	12	12	8	9	7	7	9	14	12	9	8	8	9	8	11	12
465	17	19	18	19	19	14	15	16	14	17	18	16	14	13	13	14	13	14	14	14	15	14	13	14	13	14	14	14
470	35	35	35	34	35	15	15	30	29	29	32	31	16	14	27	28	29	27	27	15	16	28	25	26	25	23	15	15
475	74	75	73	76	71	14	16	69	68	72	69	69	14	14	63	63	64	62	64	13	15	55	54	55	58	56	15	13
480	173	179	184	177	173	14	12	169	167	168	167	172	12	13	157	163	159	162	156	13	13	139	135	141	132	142	14	13
485	423	429	429	423	431	12	12	413	407	414	397	422	12	12	373	382	373	376	378	12	11	314	320	314	321	307	13	11
490	909	920	904	921	916	11	10	885	881	893	859	894	10	11	808	818	798	815	787	11	11	650	652	671	641	648	11	10
495	1829	1850	1818	1817	1823	11	10	1782	1749	1793	1708	1775	11	10	1605	1615	1583	1601	1592	11	12	1312	1280	1292	1273	1273	12	10
500	3147	3166	3186	3172	3149	10	10	3104	3085	3140	3050	3077	10	9	2802	2865	2804	2844	2790	10	10	2328	2306	2347	2285	2297	10	11
505	4714	4692	4644	4682	4688	10	10	4618	4664	4655	4603	4550	9	9	4322	4337	4314	4299	4282	10	10	3765	3766	3785	3754	3750	10	9
510	5960	5889	5892	5887	5884	10	8	5865	5886	5977	5883	5891	10	9	5725	5748	5693	5742	5626	11	11	5408	5394	5428	5389	5354	10	10
515	6725	6611	6628	6643	6616	9	9	6733	6726	6731	6652	6645	10	9	6740	6760	6716	6715	6623	9	8	6786	6778	6787	6781	6689	8	9
520	6900	6819	6847	6833	6811	7	7	6967	7006	7013	6943	6854	9	9	7068	7095	7073	7071	6989	8	9	7460	7458	7468	7428	7381	9	8
525	6733	6607	6662	6696	6661	10	9	6754	6795	6820	6761	6700	8	8	6958	6926	6957	6927	6803	7	10	7405	7451	7444	7426	7368	8	9
530	6437	6363	6362	6381	6366	7	8	6493	6565	6544	6476	6454	7	7	6657	6630	6607	6604	6558	7	8	7044	7109	7105	7103	7054	8	8
535	6172	6105	6160	6165	6114	7	7	6224	6252	6285	6192	6171	8	8	6374	6362	6328	6341	6253	7	8	6629	6734	6733	6749	6677	8	8
540	5977	5899	5916	5955	5910	8	7	6017	6020	6068	5965	5943	8	7	6052	6066	6041	6104	5988	8	7	6306	6300	6337	6316	6261	8	8
545	5809	5755	5753	5794	5769	7	7	5827	5850	5844	5831	5778	6	7	5866	5869	5839	5856	5791	6	6	5988	6018	6043	5966	6005	7	6
550	5548	5502	5505	5500	5502	6	7	5568	5593	5609	5550	5534	7	6	5566	5558	5597	5565	5534	6	6	5613	5666	5639	5596	5630	7	6
555	5239	5155	5173	5212	5143	5	6	5218	5251	5301	5198	5216	6	6	5224	5242	5181	5178	5138	6	6	5216	5214	5222	5207	5205	5	6
560	4860	4788	4774	4835	4800	5	5	4812	4824	4875	4803	4769	5	6	4800	4791	4778	4777	4739	4	6	4752	4774	4803	4790	4729	5	5
565	4429	4361	4396	4389	4342	5	6	4364	4409	4452	4395	4329	5	5	4369	4371	4319	4327	4296	4	5	4294	4337	4347	4288	4292	5	5
570	3956	3870	3894	3913	3906	4	5	3923	3923	3960	3900	3864	4	5	3858	3887	3857	3817	3804	6	5	3807	3809	3808	3798	3771	4	5
575	3498	3434	3442	3447	3429	4	5	3457	3461	3474	3449	3414	4	4	3375	3390	3416	3384	3377	4	4	3348	3332	3354	3346	3298	3	3
580	3068	3028	3050	3069	3056	4	4	3051	3047	3080	3051	3014	3	4	2995	3013	2980	3004	2982	4	5	2919	2944	2932	2898	2907	3	5
585	2707	2695	2711	2716	2707	4	3	2714	2718	2704	2705	2677	4	4	2662	2633	2643	2627	2630	4	4	2565	2585	2569	2603	2582	4	4
590	2431	2400	2398	2402	2384	4	4	2384	2389	2373	2387	2356	3	3	2331	2350	2339	2325	2320	4	3	2250	2254	2233	2250	2258	4	3
595	2210	2149	2157	2158	2118	4	4	2139	2143	2159	2137	2116	3	4	2074	2095	2080	2090	2062	3	3	2002	1986	2001	1982	1980	5	4
600	1957	1930	1947	1950	1930	3	4	1926	1912	1930	1906	1915	3	3	1898	1874	1875	1885	1843	4	3	1775	1815	1815	1806	1787	3	3
605	1749	1737	1757	1771	1751	3	3	1747	1750	1767	1740	1724	3	3	1711	1704	1676	1697	1672	3	3	1622	1604	1613	1619	1601	4	4
610	1624	1581	1596	1596	1586	3	3	1568	1584	1588	1590	1553	3	3	1560	1528	1535	1525	1508	3	4	1468	1482	1466	1463	1439	4	3
615	1430	1415	1424	1440	1412	2	3	1408	1400	1424	1396	1381	3	3	1374	1365	1362	1361	1347	4	3	1295	1309	1291	1289	1286	4	3
620	1274	1266	1275	1277	1273	3	2	1261	1276	1270	1278	1244	3	3	1217	1217	1206	1224	1201	3	3	1146	1154	1165	1157	1148	3	3
625	1139	1136	1120	1130	1129	4	3	1130	1122	1139	1126	1116	3	2	1088	1082	1096	1088	1055	3	3	1032	1022	1025	1028	1020	3	3
630	1005	979	990	990	987	2	3	989	1004	966	982	958	3	3	953	939	958	955	942	2	3	889	904	900	904	876	3	3
635	897	874	877	886	885	2	3	884	856	883	862	853	2	3	843	822	859	829	832	2	2	787	792	787	793	786	3	3
640	789	779	784	774	773	2	3	766	762	761	761	776	4	2	737	755	746	749	752	3	3	702	693	699	697	693	3	3
645	693	666	680	696	684	2	3	680	667	697	672	671	2	3	648	662	648	650	642	3	3	603	628	613	606	615	3	3
650	597	589	595	591	603	2	2	588	605	602	599	592	3	3	567	571	585	569	564	4	4	539	538	546	538	521	4	3
	Average value of five wells with FS, same pH
Wavel.	pH 4.5	pH 5.0	pH 5.5	pH 6.0
465	18.4	16.2	13.6	13.6
470	34.8	30.2	27.6	25.4
475	73.8	69.4	63.2	55.6
480	177.2	168.6	159.4	137.8
485	427	410.6	376.4	315.2
490	914	882.4	805.2	652.4
495	1827.4	1761.4	1599.2	1286
500	3164	3091.2	2821	2312.6
505	4684	4618	4310.8	3764
510	5902.4	5900.4	5706.8	5394.6
515	6644.6	6697.4	6710.8	6764.2
520	6842	6956.6	7059.2	7439
525	6671.8	6766	6914.2	7418.8
530	6381.8	6506.4	6611.2	7083
535	6143.2	6224.8	6331.6	6704.4
540	5931.4	6002.6	6050.2	6304
545	5776	5826	5844.2	6004
550	5511.4	5570.8	5564	5628.8
555	5184.4	5236.8	5192.6	5212.8
560	4811.4	4816.6	4777	4769.6
565	4383.4	4389.8	4336.4	4311.6
570	3907.8	3914	3844.6	3798.6
575	3450	3451	3388.4	3335.6
580	3054.2	3048.6	2994.8	2920
585	2707.2	2703.6	2639	2580.8
590	2403	2377.8	2333	2249
595	2158.4	2138.8	2080.2	1990.2
600	1942.8	1917.8	1875	1799.6
605	1753	1745.6	1692	1611.8
610	1596.6	1576.6	1531.2	1463.6
615	1424.2	1401.8	1361.8	1294
620	1273	1265.8	1213	1154
625	1130.8	1126.6	1081.8	1025.4
630	990.2	979.8	949.4	894.6
635	883.8	867.6	837	789
640	779.8	765.2	747.8	696.8
645	683.8	677.4	650	613
650	595	597.2	571.2	536.4

## Sheet: S1e
control	6.24304
control	6.3673
control	6.40725
control	6.38967
control	6.41483
control	6.39367
control	6.35776
control	6.35522
control	6.44807
h2o2	6.33228
h2o2	6.41375
h2o2	6.38046
h2o2	6.34644
h2o2	6.42291
h2o2	6.37237
h2o2	6.38197
h2o2	6.35579
h2o2	6.31898
dtt	6.5064
dtt	6.51938
dtt	6.44035
dtt	6.49094
dtt	6.48996
dtt	6.44458
dtt	6.30691
dtt	6.36147
dtt	6.46933
cacl2	8.05546
cacl2	8.21191
cacl2	8.23693
cacl2	8.19733
cacl2	8.10918
cacl2	8.10981
cacl2	7.68909
cacl2	7.83884
cacl2	7.97369
kcl	8.61784
kcl	8.66557
kcl	8.63
kcl	8.41814
kcl	8.33925
kcl	8.37877
kcl	8.59686
kcl	8.58959
kcl	8.48896
