# Supplementary material for: The AUX1-AFB1-CNGC14 module establishes a longitudinal root surface pH profile
Source: eLife. 2023 Jul 14;12:e85193. doi: 10.7554/eLife.85193 (PMC10414970; doi:10.7554/eLife.85193)
Supplement: Figure 1—source data 1. [file elife-85193-fig1-data1.xlsx]

## Sheet: 1a-rep1
Wavel.	A1	A2	A3	A4	A5	A11	A12	C1	C2	C3	C4	C5	C11	C12	F1	F2	F3	F4	F5	F11	F12	H1	H2	H3	H4	H5	H11	H12					1	2	3	4	5	6	7	8	9	10	11	12
350	2581	2737	2706	2622	2953	28	30	2905	2840	2856	2941	2847	36	36	2980	3050	3086	3099	3045	59	60	3359	3349	3370	3359	3405	63	62			pH 4.5	A
355	3142	3294	3345	3197	3602	32	30	3490	3456	3445	3593	3464	34	32	3597	3653	3716	3702	3650	57	56	3922	3884	3924	3930	3931	57	56				B
360	4077	4245	4299	4146	4662	27	27	4547	4507	4479	4640	4481	35	31	4620	4669	4781	4730	4669	49	49	4980	4960	4989	5007	5076	54	51			pH 5.0	C
365	5997	6296	6338	6098	6802	36	39	6612	6589	6572	6786	6626	41	40	6798	6864	6947	6969	6839	68	66	7223	7244	7322	7297	7377	68	71				D
370	6762	7043	7109	6794	7610	35	40	7365	7340	7348	7583	7328	45	42	7610	7675	7813	7791	7648	70	70	8121	8158	8193	8196	8299	74	77				E
375	7013	7308	7353	7073	7816	32	35	7746	7615	7529	7913	7613	36	39	7930	7907	8099	8040	7958	64	65	8445	8501	8539	8514	8637	66	68			pH 5.5	F
380	8034	8401	8405	8180	9024	36	36	8734	8758	8677	8987	8719	42	41	9039	9085	9218	9209	9060	64	70	9638	9753	9746	9720	9891	74	73				G
385	7701	8012	8100	7786	8551	34	36	8317	8325	8323	8560	8323	41	37	8567	8651	8746	8795	8594	68	68	9207	9234	9251	9289	9319	73	71			pH 6.0	H
390	7689	8024	8081	7797	8595	40	34	8327	8249	8192	8527	8305	43	39	8505	8559	8655	8695	8554	67	71	9029	9064	9128	9114	9198	74	75
395	8185	8465	8529	8224	9135	39	43	8724	8671	8639	8987	8721	46	51	8889	8987	9095	9116	8968	75	84	9423	9502	9480	9507	9532	86	83
400	8349	8689	8748	8441	9284	46	50	8942	8920	8805	9088	8819	56	44	9054	9110	9207	9153	9071	96	100	9570	9622	9623	9639	9729	105	100
405	8548	8915	8950	8672	9534	40	49	9049	8951	8977	9305	9022	54	51	9127	9236	9357	9319	9217	93	92	9666	9783	9731	9804	9808	107	99
410	9777	10222	10247	9906	10781	44	47	10274	10175	10196	10535	10235	60	53	10424	10462	10564	10507	10417	92	98	10909	10968	11068	11085	11122	98	102
415	11371	11823	11903	11578	12504	40	40	11937	11866	11778	12139	11926	51	49	11980	12087	12287	12291	12050	88	85	12694	12770	12765	12787	12824	92	86
420	12781	13240	13163	12846	13730	27	27	13332	13149	13113	13483	13241	41	33	13452	13570	13685	13671	13487	61	61	14323	14459	14515	14488	14525	67	67
425	15266	15750	15893	15348	16508	24	31	15931	15794	15685	16214	15871	37	31	16290	16438	16593	16529	16387	55	59	17700	17754	17735	17803	17932	62	60
430	17964	18548	18673	18170	19183	33	33	18860	18644	18567	19170	18765	39	35	19446	19614	19875	19785	19580	62	65	21774	21844	21839	21880	22087	67	65
435	20248	20843	21040	20394	21720	33	35	21321	21264	21070	21725	21119	40	37	22552	22543	22864	22787	22533	60	65	25609	25846	25773	25804	25892	65	66
440	22904	23647	23735	23059	24365	34	34	24335	24318	24128	24752	24206	41	35	25913	26138	26287	26234	26050	60	63	30427	30476	30572	30517	30640	68	65
445	26040	26582	26739	26106	27406	27	32	27767	27735	27569	28245	27738	41	35	30218	30330	30537	30595	30312	60	66	36486	36418	36459	36452	36671	64	62
450	28990	29731	29898	29235	30575	33	35	31330	31187	30978	31746	31357	42	37	34955	35079	35473	35428	34990	62	64	43946	43884	44040	43673	44031	70	67
455	30787	31626	31727	31029	32585	32	33	34142	33765	33697	34421	33882	45	39	38925	39332	39838	39508	39107	64	67	51447	51313	51716	51352	51808	72	70
460	29032	29596	29518	28847	30473	28	30	32314	32179	31932	32735	32157	36	34	38473	38805	39042	38875	38649	54	58	52881	53407	53249	53054	53301	59	59
465	30942	31781	31861	31112	32711	30	37	35292	35035	34747	35644	35046	41	37	43236	43500	43985	43711	43241	68	70	61601	61871	62046	62179	62303	73	67
470	30940	31537	31832	31129	32716	35	37	35551	35262	34987	35861	35147	46	40	44370	44643	44974	44991	44523	70	76	65229	65024	65539	65060	65317	82	73
475	30750	31479	31455	30887	32526	31	41	35820	35476	35266	36154	35440	46	38	46002	46056	46434	46164	45765	67	73	68273	68869	69028	68642	68963	83	77
480	31584	32340	32435	31783	33508	36	37	37578	37517	37049	38099	37376	42	41	50498	50885	51167	50931	50412	70	70	78141	78723	78854	78518	78651	76	74
485	29215	29998	29729	29186	30916	26	32	36364	36028	35816	36496	35784	35	31	51770	52202	52483	52384	51732	56	54	83951	83750	83955	83712	84222	61	59
490	29600	30213	30369	29701	31755	30	31	39013	38741	38421	39484	38660	37	37	60203	60603	61156	60778	60206	63	64	101979	101791	101984	101804	101612	69	65
495	27674	28361	28441	27649	30202	35	46	39342	39494	38765	39865	39244	48	43	66714	67347	68021	67441	67065	78	88	117656	118070	117953	117220	117716	86	87
500	20516	21030	21400	20495	23077	43	52	32024	31892	31465	32655	31853	58	48	59758	59663	60638	60282	59774	93	90	110398	110596	110983	110630	110491	99	94
	Average value of five wells with FS, same pH
Wavel.	pH 4.5	pH 5.0	pH 5.5	pH 6.0
350	2719.8	2877.8	3052	3368.4
355	3316	3489.6	3663.6	3918.2
360	4285.8	4530.8	4693.8	5002.4
365	6306.2	6637	6883.4	7292.6
370	7063.6	7392.8	7707.4	8193.4
375	7312.6	7683.2	7986.8	8527.2
380	8408.8	8775	9122.2	9749.6
385	8030	8369.6	8670.6	9260
390	8037.2	8320	8593.6	9106.6
395	8507.6	8748.4	9011	9488.8
400	8702.2	8914.8	9119	9636.6
405	8923.8	9060.8	9251.2	9758.4
410	10186.6	10283	10474.8	11030.4
415	11835.8	11929.2	12139	12768
420	13152	13263.6	13573	14462
425	15753	15899	16447.4	17784.8
430	18507.6	18801.2	19660	21884.8
435	20849	21299.8	22655.8	25784.8
440	23542	24347.8	26124.4	30526.4
445	26574.6	27810.8	30398.4	36497.2
450	29685.8	31319.6	35185	43914.8
455	31550.8	33981.4	39342	51527.2
460	29493.2	32263.4	38768.8	53178.4
465	31681.4	35152.8	43534.6	62000
470	31630.8	35361.6	44700.2	65233.8
475	31419.4	35631.2	46084.2	68755
480	32330	37523.8	50778.6	78577.4
485	29808.8	36097.6	52114.2	83918
490	30327.6	38863.8	60589.2	101834
495	28465.4	39342	67317.6	117723
500	21303.6	31977.8	60023	110620

## Sheet: 1a-rep2
Wavel.	A1	A2	A3	A4	A5	A11	A12	C1	C2	C3	C4	C5	C11	C12	F1	F2	F3	F4	F5	F11	F12	H1	H2	H3	H4	H5	H11	H12					1	2	3	4	5	6	7	8	9	10	11	12
350	2581	2737	2706	2622	2953	28	30	2905	2840	2856	2941	2847	36	36	2980	3050	3086	3099	3045	59	60	3359	3349	3370	3359	3405	63	62			pH 4.5	A
355	3142	3294	3345	3197	3602	32	30	3490	3456	3445	3593	3464	34	32	3597	3653	3716	3702	3650	57	56	3922	3884	3924	3930	3931	57	56				B
360	4077	4245	4299	4146	4662	27	27	4547	4507	4479	4640	4481	35	31	4620	4669	4781	4730	4669	49	49	4980	4960	4989	5007	5076	54	51			pH 5.0	C
365	5997	6296	6338	6098	6802	36	39	6612	6589	6572	6786	6626	41	40	6798	6864	6947	6969	6839	68	66	7223	7244	7322	7297	7377	68	71				D
370	6762	7043	7109	6794	7610	35	40	7365	7340	7348	7583	7328	45	42	7610	7675	7813	7791	7648	70	70	8121	8158	8193	8196	8299	74	77				E
375	7013	7308	7353	7073	7816	32	35	7746	7615	7529	7913	7613	36	39	7930	7907	8099	8040	7958	64	65	8445	8501	8539	8514	8637	66	68			pH 5.5	F
380	8034	8401	8405	8180	9024	36	36	8734	8758	8677	8987	8719	42	41	9039	9085	9218	9209	9060	64	70	9638	9753	9746	9720	9891	74	73				G
385	7701	8012	8100	7786	8551	34	36	8317	8325	8323	8560	8323	41	37	8567	8651	8746	8795	8594	68	68	9207	9234	9251	9289	9319	73	71			pH 6.0	H
390	7689	8024	8081	7797	8595	40	34	8327	8249	8192	8527	8305	43	39	8505	8559	8655	8695	8554	67	71	9029	9064	9128	9114	9198	74	75
395	8185	8465	8529	8224	9135	39	43	8724	8671	8639	8987	8721	46	51	8889	8987	9095	9116	8968	75	84	9423	9502	9480	9507	9532	86	83
400	8349	8689	8748	8441	9284	46	50	8942	8920	8805	9088	8819	56	44	9054	9110	9207	9153	9071	96	100	9570	9622	9623	9639	9729	105	100
405	8548	8915	8950	8672	9534	40	49	9049	8951	8977	9305	9022	54	51	9127	9236	9357	9319	9217	93	92	9666	9783	9731	9804	9808	107	99
410	9777	10222	10247	9906	10781	44	47	10274	10175	10196	10535	10235	60	53	10424	10462	10564	10507	10417	92	98	10909	10968	11068	11085	11122	98	102
415	11371	11823	11903	11578	12504	40	40	11937	11866	11778	12139	11926	51	49	11980	12087	12287	12291	12050	88	85	12694	12770	12765	12787	12824	92	86
420	12781	13240	13163	12846	13730	27	27	13332	13149	13113	13483	13241	41	33	13452	13570	13685	13671	13487	61	61	14323	14459	14515	14488	14525	67	67
425	15266	15750	15893	15348	16508	24	31	15931	15794	15685	16214	15871	37	31	16290	16438	16593	16529	16387	55	59	17700	17754	17735	17803	17932	62	60
430	17964	18548	18673	18170	19183	33	33	18860	18644	18567	19170	18765	39	35	19446	19614	19875	19785	19580	62	65	21774	21844	21839	21880	22087	67	65
435	20248	20843	21040	20394	21720	33	35	21321	21264	21070	21725	21119	40	37	22552	22543	22864	22787	22533	60	65	25609	25846	25773	25804	25892	65	66
440	22904	23647	23735	23059	24365	34	34	24335	24318	24128	24752	24206	41	35	25913	26138	26287	26234	26050	60	63	30427	30476	30572	30517	30640	68	65
445	26040	26582	26739	26106	27406	27	32	27767	27735	27569	28245	27738	41	35	30218	30330	30537	30595	30312	60	66	36486	36418	36459	36452	36671	64	62
450	28990	29731	29898	29235	30575	33	35	31330	31187	30978	31746	31357	42	37	34955	35079	35473	35428	34990	62	64	43946	43884	44040	43673	44031	70	67
455	30787	31626	31727	31029	32585	32	33	34142	33765	33697	34421	33882	45	39	38925	39332	39838	39508	39107	64	67	51447	51313	51716	51352	51808	72	70
460	29032	29596	29518	28847	30473	28	30	32314	32179	31932	32735	32157	36	34	38473	38805	39042	38875	38649	54	58	52881	53407	53249	53054	53301	59	59
465	30942	31781	31861	31112	32711	30	37	35292	35035	34747	35644	35046	41	37	43236	43500	43985	43711	43241	68	70	61601	61871	62046	62179	62303	73	67
470	30940	31537	31832	31129	32716	35	37	35551	35262	34987	35861	35147	46	40	44370	44643	44974	44991	44523	70	76	65229	65024	65539	65060	65317	82	73
475	30750	31479	31455	30887	32526	31	41	35820	35476	35266	36154	35440	46	38	46002	46056	46434	46164	45765	67	73	68273	68869	69028	68642	68963	83	77
480	31584	32340	32435	31783	33508	36	37	37578	37517	37049	38099	37376	42	41	50498	50885	51167	50931	50412	70	70	78141	78723	78854	78518	78651	76	74
485	29215	29998	29729	29186	30916	26	32	36364	36028	35816	36496	35784	35	31	51770	52202	52483	52384	51732	56	54	83951	83750	83955	83712	84222	61	59
490	29600	30213	30369	29701	31755	30	31	39013	38741	38421	39484	38660	37	37	60203	60603	61156	60778	60206	63	64	101979	101791	101984	101804	101612	69	65
495	27674	28361	28441	27649	30202	35	46	39342	39494	38765	39865	39244	48	43	66714	67347	68021	67441	67065	78	88	117656	118070	117953	117220	117716	86	87
500	20516	21030	21400	20495	23077	43	52	32024	31892	31465	32655	31853	58	48	59758	59663	60638	60282	59774	93	90	110398	110596	110983	110630	110491	99	94
	Average value of five wells with FS, same pH
Wavel.	pH 4.5	pH 5.0	pH 5.5	pH 6.0
375	7312.6	7683.2	7986.8	8527.2
380	8408.8	8775	9122.2	9749.6
385	8030	8369.6	8670.6	9260
390	8037.2	8320	8593.6	9106.6
395	8507.6	8748.4	9011	9488.8
400	8702.2	8914.8	9119	9636.6
405	8923.8	9060.8	9251.2	9758.4
410	10186.6	10283	10474.8	11030.4
415	11835.8	11929.2	12139	12768
420	13152	13263.6	13573	14462
425	15753	15899	16447.4	17784.8
430	18507.6	18801.2	19660	21884.8
435	20849	21299.8	22655.8	25784.8
440	23542	24347.8	26124.4	30526.4
445	26574.6	27810.8	30398.4	36497.2
450	29685.8	31319.6	35185	43914.8
455	31550.8	33981.4	39342	51527.2
460	29493.2	32263.4	38768.8	53178.4
465	31681.4	35152.8	43534.6	62000
470	31630.8	35361.6	44700.2	65233.8
475	31419.4	35631.2	46084.2	68755
480	32330	37523.8	50778.6	78577.4
485	29808.8	36097.6	52114.2	83918
490	30327.6	38863.8	60589.2	101834
495	28465.4	39342	67317.6	117723
500	21303.6	31977.8	60023	110620

## Sheet: 1b-rep1
Wavel.	A1	A2	A3	A4	A5	A11	A12	C1	C2	C3	C4	C5	C11	C12	F1	F2	F3	F4	F5	F11	F12	H1	H2	H3	H4	H5	H11	H12					1	2	3	4	5	6	7	8	9	10	11	12
505	24992	24785	24620	24698	24597	52	50	28528	28386	28432	28467	28136	52	53	36538	37115	36808	36793	36413	58	50	50238	49811	49801	49524	49387	46	53			pH 4.5	A
510	32056	32026	31820	31838	31686	10	9	38446	38266	38305	38375	37988	10	11	53626	53558	53229	53348	52831	11	10	79120	78556	78584	78278	77626	9	10				B
515	36545	36404	36125	36301	36153	9	11	44828	45008	44642	44892	44630	9	9	65685	66178	65516	65475	64704	10	10	103680	102357	102955	102606	102141	11	9			pH 5.0	C
520	37737	37567	37444	37615	37401	9	9	46879	47148	46691	47160	46614	10	9	70587	70644	70382	70220	69934	8	8	113958	113469	113554	113741	112891	9	9				D
525	36690	36528	36353	36345	36078	8	9	45443	45662	45284	45513	45235	7	9	68558	68490	68004	67965	67792	9	8	111741	111590	111114	111496	110351	9	9				E
530	34725	34376	34480	34456	34304	7	8	42572	42633	42301	42760	42262	8	10	62973	63186	62640	62352	62373	7	8	102403	101892	101995	101429	100468	9	9			pH 5.5	F
535	32815	32643	32433	32629	32577	9	7	39621	39597	39282	39821	38995	8	9	56857	56871	56756	56392	56213	8	10	89988	90531	89743	90049	88841	9	8				G
540	31061	30861	30805	30844	30775	8	8	36565	36835	36462	36866	36516	9	9	51241	51107	51024	50817	50566	9	9	78555	78746	78087	78254	77814	8	9			pH 6.0	H
545	29742	29641	29390	29489	29461	9	9	34446	34463	34357	34559	34371	8	9	46272	46284	46390	45997	45762	7	7	68578	68707	68644	68545	67826	7	9
550	28117	27795	27679	27771	27565	8	9	31975	32078	31930	32090	31825	8	8	42012	42034	41538	41854	41459	6	8	60676	60519	60331	60066	59912	8	7
555	26193	26016	25853	26048	25824	7	6	29653	29706	29418	29730	29428	7	7	37949	37894	37886	37713	37440	7	7	53620	53568	53217	53173	52885	7	6
560	24000	23817	23833	23872	23657	7	7	26822	26985	26683	27002	26880	7	5	34189	33938	33910	33736	33639	6	7	47001	47085	46867	47135	46474	7	7
565	21764	21647	21533	21622	21512	7	5	24172	24332	24098	24387	24027	7	6	30284	30198	29992	29936	29906	6	6	41115	41197	41076	41056	40620	7	5
570	19202	19102	19176	19099	19017	6	7	21298	21351	21177	21341	21149	6	5	26065	26117	26065	25999	25847	6	5	35187	34997	34962	34974	34651	6	7
575	16969	16884	16753	16882	16766	6	6	18650	18724	18539	18571	18481	7	6	22519	22508	22304	22410	22281	6	6	29860	29797	29684	29680	29453	8	6
580	14830	14749	14781	14830	14721	6	6	16261	16285	16171	16318	16119	7	6	19406	19398	19312	19192	19174	6	7	25038	25073	24936	25029	24654	7	8
585	13106	13064	12999	13026	13016	7	5	14252	14233	14191	14251	14154	6	6	16771	16637	16657	16642	16482	7	5	21173	21215	20989	21104	20829	7	6
590	11557	11472	11446	11386	11393	6	6	12397	12376	12354	12445	12343	5	6	14313	14295	14297	14195	14206	6	6	17656	17689	17535	17615	17394	5	6
595	10245	10178	10187	10133	10171	5	4	11004	11001	10894	10987	10890	5	5	12495	12456	12383	12380	12305	4	4	15037	15049	14891	14928	14800	4	5
600	9217	9174	9115	9192	9141	4	4	9769	9784	9677	9831	9684	4	4	10970	10979	10875	10834	10802	5	5	12935	12966	12829	12867	12766	4	4
605	8283	8227	8210	8270	8170	3	3	8778	8800	8692	8788	8733	5	4	9690	9732	9658	9662	9621	4	4	11301	11261	11237	11209	11147	4	3
610	7496	7449	7468	7450	7432	3	4	7948	7937	7853	7900	7854	3	4	8662	8638	8607	8597	8549	4	3	9863	9891	9783	9838	9774	4	4
615	6673	6631	6634	6649	6590	3	3	6965	6968	6921	6984	6930	3	4	7575	7588	7584	7544	7536	3	3	8556	8524	8506	8527	8437	4	4
620	5945	5862	5926	5895	5913	3	3	6238	6226	6233	6264	6202	3	3	6754	6745	6709	6680	6642	3	3	7543	7457	7425	7482	7392	3	4
625	5266	5265	5279	5238	5196	3	3	5535	5507	5493	5512	5488	4	4	5920	5857	5914	5870	5869	3	4	6482	6411	6456	6433	6402	3	4
630	4616	4609	4620	4604	4564	3	3	4806	4861	4772	4802	4774	3	4	5148	5104	5102	5109	5123	4	3	5540	5572	5554	5529	5485	4	4
635	4103	4103	4055	4044	4038	2	3	4236	4218	4239	4238	4204	3	3	4469	4512	4446	4483	4431	3	3	4829	4802	4795	4781	4759	4	2
640	3579	3587	3570	3563	3554	5	3	3758	3758	3687	3726	3695	4	2	3856	3919	3894	3891	3868	3	3	4141	4140	4128	4097	4083	4	4
645	3160	3139	3144	3110	3111	3	4	3270	3274	3208	3266	3253	3	2	3427	3394	3369	3372	3340	4	4	3556	3577	3527	3529	3497	3	3
650	2771	2756	2757	2734	2719	4	2	2877	2852	2848	2875	2798	2	2	2962	2980	2924	2929	2931	3	3	3062	3053	3035	3023	2999	3	3
	Average value of five wells with FS, same pH
Wavel.	pH 4.5	pH 5.0	pH 5.5	pH 6.0
505	24738.4	28389.8	36733.4	49752.2
510	31885.2	38276	53318.4	78432.8
515	36305.6	44800	65511.6	102748
520	37552.8	46898.4	70353.4	113523
525	36398.8	45427.4	68161.8	111258
530	34468.2	42505.6	62704.8	101637
535	32619.4	39463.2	56617.8	89830.4
540	30869.2	36648.8	50951	78291.2
545	29544.6	34439.2	46141	68460
550	27785.4	31979.6	41779.4	60300.8
555	25986.8	29587	37776.4	53292.6
560	23835.8	26874.4	33882.4	46912.4
565	21615.6	24203.2	30063.2	41012.8
570	19119.2	21263.2	26018.6	34954.2
575	16850.8	18593	22404.4	29694.8
580	14782.2	16230.8	19296.4	24946
585	13042.2	14216.2	16637.8	21062
590	11450.8	12383	14261.2	17577.8
595	10182.8	10955.2	12403.8	14941
600	9167.8	9749	10892	12872.6
605	8232	8758.2	9672.6	11231
610	7459	7898.4	8610.6	9829.8
615	6635.4	6953.6	7565.4	8510
620	5908.2	6232.6	6706	7459.8
625	5248.8	5507	5886	6436.8
630	4602.6	4803	5117.2	5536
635	4068.6	4227	4468.2	4793.2
640	3570.6	3724.8	3885.6	4117.8
645	3132.8	3254.2	3380.4	3537.2
650	2747.4	2850	2945.2	3034.4

## Sheet: 1b-rep2
Wavel.	A1	A2	A3	A4	A5	A11	A12	C1	C2	C3	C4	C5	C11	C12	F1	F2	F3	F4	F5	F11	F12	H1	H2	H3	H4	H5	H11	H12					1	2	3	4	5	6	7	8	9	10	11	12
505	24992	24785	24620	24698	24597	52	50	28528	28386	28432	28467	28136	52	53	36538	37115	36808	36793	36413	58	50	50238	49811	49801	49524	49387	46	53			pH 4.5	A
510	32056	32026	31820	31838	31686	10	9	38446	38266	38305	38375	37988	10	11	53626	53558	53229	53348	52831	11	10	79120	78556	78584	78278	77626	9	10				B
515	36545	36404	36125	36301	36153	9	11	44828	45008	44642	44892	44630	9	9	65685	66178	65516	65475	64704	10	10	103680	102357	102955	102606	102141	11	9			pH 5.0	C
520	37737	37567	37444	37615	37401	9	9	46879	47148	46691	47160	46614	10	9	70587	70644	70382	70220	69934	8	8	113958	113469	113554	113741	112891	9	9				D
525	36690	36528	36353	36345	36078	8	9	45443	45662	45284	45513	45235	7	9	68558	68490	68004	67965	67792	9	8	111741	111590	111114	111496	110351	9	9				E
530	34725	34376	34480	34456	34304	7	8	42572	42633	42301	42760	42262	8	10	62973	63186	62640	62352	62373	7	8	102403	101892	101995	101429	100468	9	9			pH 5.5	F
535	32815	32643	32433	32629	32577	9	7	39621	39597	39282	39821	38995	8	9	56857	56871	56756	56392	56213	8	10	89988	90531	89743	90049	88841	9	8				G
540	31061	30861	30805	30844	30775	8	8	36565	36835	36462	36866	36516	9	9	51241	51107	51024	50817	50566	9	9	78555	78746	78087	78254	77814	8	9			pH 6.0	H
545	29742	29641	29390	29489	29461	9	9	34446	34463	34357	34559	34371	8	9	46272	46284	46390	45997	45762	7	7	68578	68707	68644	68545	67826	7	9
550	28117	27795	27679	27771	27565	8	9	31975	32078	31930	32090	31825	8	8	42012	42034	41538	41854	41459	6	8	60676	60519	60331	60066	59912	8	7
555	26193	26016	25853	26048	25824	7	6	29653	29706	29418	29730	29428	7	7	37949	37894	37886	37713	37440	7	7	53620	53568	53217	53173	52885	7	6
560	24000	23817	23833	23872	23657	7	7	26822	26985	26683	27002	26880	7	5	34189	33938	33910	33736	33639	6	7	47001	47085	46867	47135	46474	7	7
565	21764	21647	21533	21622	21512	7	5	24172	24332	24098	24387	24027	7	6	30284	30198	29992	29936	29906	6	6	41115	41197	41076	41056	40620	7	5
570	19202	19102	19176	19099	19017	6	7	21298	21351	21177	21341	21149	6	5	26065	26117	26065	25999	25847	6	5	35187	34997	34962	34974	34651	6	7
575	16969	16884	16753	16882	16766	6	6	18650	18724	18539	18571	18481	7	6	22519	22508	22304	22410	22281	6	6	29860	29797	29684	29680	29453	8	6
580	14830	14749	14781	14830	14721	6	6	16261	16285	16171	16318	16119	7	6	19406	19398	19312	19192	19174	6	7	25038	25073	24936	25029	24654	7	8
585	13106	13064	12999	13026	13016	7	5	14252	14233	14191	14251	14154	6	6	16771	16637	16657	16642	16482	7	5	21173	21215	20989	21104	20829	7	6
590	11557	11472	11446	11386	11393	6	6	12397	12376	12354	12445	12343	5	6	14313	14295	14297	14195	14206	6	6	17656	17689	17535	17615	17394	5	6
595	10245	10178	10187	10133	10171	5	4	11004	11001	10894	10987	10890	5	5	12495	12456	12383	12380	12305	4	4	15037	15049	14891	14928	14800	4	5
600	9217	9174	9115	9192	9141	4	4	9769	9784	9677	9831	9684	4	4	10970	10979	10875	10834	10802	5	5	12935	12966	12829	12867	12766	4	4
605	8283	8227	8210	8270	8170	3	3	8778	8800	8692	8788	8733	5	4	9690	9732	9658	9662	9621	4	4	11301	11261	11237	11209	11147	4	3
610	7496	7449	7468	7450	7432	3	4	7948	7937	7853	7900	7854	3	4	8662	8638	8607	8597	8549	4	3	9863	9891	9783	9838	9774	4	4
615	6673	6631	6634	6649	6590	3	3	6965	6968	6921	6984	6930	3	4	7575	7588	7584	7544	7536	3	3	8556	8524	8506	8527	8437	4	4
620	5945	5862	5926	5895	5913	3	3	6238	6226	6233	6264	6202	3	3	6754	6745	6709	6680	6642	3	3	7543	7457	7425	7482	7392	3	4
625	5266	5265	5279	5238	5196	3	3	5535	5507	5493	5512	5488	4	4	5920	5857	5914	5870	5869	3	4	6482	6411	6456	6433	6402	3	4
630	4616	4609	4620	4604	4564	3	3	4806	4861	4772	4802	4774	3	4	5148	5104	5102	5109	5123	4	3	5540	5572	5554	5529	5485	4	4
635	4103	4103	4055	4044	4038	2	3	4236	4218	4239	4238	4204	3	3	4469	4512	4446	4483	4431	3	3	4829	4802	4795	4781	4759	4	2
640	3579	3587	3570	3563	3554	5	3	3758	3758	3687	3726	3695	4	2	3856	3919	3894	3891	3868	3	3	4141	4140	4128	4097	4083	4	4
645	3160	3139	3144	3110	3111	3	4	3270	3274	3208	3266	3253	3	2	3427	3394	3369	3372	3340	4	4	3556	3577	3527	3529	3497	3	3
650	2771	2756	2757	2734	2719	4	2	2877	2852	2848	2875	2798	2	2	2962	2980	2924	2929	2931	3	3	3062	3053	3035	3023	2999	3	3
	Average value of five wells with FS, same pH
Wavel.	pH 4.5	pH 5.0	pH 5.5	pH 6.0
505	24738.4	28389.8	36733.4	49752.2
510	31885.2	38276	53318.4	78432.8
515	36305.6	44800	65511.6	102748
520	37552.8	46898.4	70353.4	113523
525	36398.8	45427.4	68161.8	111258
530	34468.2	42505.6	62704.8	101637
535	32619.4	39463.2	56617.8	89830.4
540	30869.2	36648.8	50951	78291.2
545	29544.6	34439.2	46141	68460
550	27785.4	31979.6	41779.4	60300.8
555	25986.8	29587	37776.4	53292.6
560	23835.8	26874.4	33882.4	46912.4
565	21615.6	24203.2	30063.2	41012.8
570	19119.2	21263.2	26018.6	34954.2
575	16850.8	18593	22404.4	29694.8
580	14782.2	16230.8	19296.4	24946
585	13042.2	14216.2	16637.8	21062
590	11450.8	12383	14261.2	17577.8
595	10182.8	10955.2	12403.8	14941
600	9167.8	9749	10892	12872.6
605	8232	8758.2	9672.6	11231
610	7459	7898.4	8610.6	9829.8
615	6635.4	6953.6	7565.4	8510
620	5908.2	6232.6	6706	7459.8
625	5248.8	5507	5886	6436.8
630	4602.6	4803	5117.2	5536
635	4068.6	4227	4468.2	4793.2
640	3570.6	3724.8	3885.6	4117.8
645	3132.8	3254.2	3380.4	3537.2
650	2747.4	2850	2945.2	3034.4
																																pH 4.5
																																pH 5.0
																																pH 5.5
																																pH 6.0

## Sheet: 1d
pH 3.83	0.745283
pH 3.83	0.744896
pH 3.83	0.748362
pH 3.83	0.74894
pH 3.83	0.750101
pH 3.83	0.75025
pH 3.83	0.751551
pH 3.83	0.750752
pH 3.83	0.755956
pH 4.38	1.0562
pH 4.38	1.05454
pH 4.38	1.05837
pH 4.38	1.05923
pH 4.38	1.06709
pH 4.38	1.06457
pH 4.38	1.06461
pH 4.38	1.07217
pH 4.38	1.0711
pH 4.84	1.36573
pH 4.84	1.36265
pH 4.84	1.36783
pH 4.84	1.35262
pH 4.84	1.34319
pH 4.84	1.33239
pH 4.84	1.36623
pH 4.84	1.3641
pH 4.84	1.35721
pH 5.28	1.88031
pH 5.28	1.87047
pH 5.28	1.86257
pH 5.28	1.88643
pH 5.28	1.85136
pH 5.28	1.87653
pH 5.28	1.87297
pH 5.28	1.8728
pH 5.28	1.83684
pH 5.75	3.01538
pH 5.75	3.04737
pH 5.75	3.03566
pH 5.75	3.01628
pH 5.75	2.97075
pH 5.75	3.03997
pH 5.75	2.99651
pH 5.75	3.02127
pH 6.52	7.11763
pH 6.52	7.09113
pH 6.52	7.11081
pH 6.52	7.0454
pH 6.52	7.11107
pH 6.52	7.04045
pH 6.52	7.08255
pH 6.52	7.05596
pH 6.52	7.09178

## Sheet: 1f
distance from the root tip in µm	Ratio 488/405nm
0	1.26318
1.1	1.25379
2.2	1.26301
3.3	1.26083
4.4	1.26194
5.5	1.25088
6.6	1.26596
7.7	1.26073
8.8	1.24129
9.9	1.26183
11	1.26372
12.1	1.2444
13.2	1.21464
14.3	1.22269
15.4	1.26345
16.5	1.25039
17.6	1.24247
18.7	1.25249
19.8	1.24583
20.9	1.25842
22	1.24151
23.1	1.23288
24.2	1.22907
25.3	1.24724
26.4	1.26208
27.5	1.26985
28.6	1.25473
29.7	1.25847
30.8	1.26504
31.9	1.25948
33	1.25283
34.1	1.25381
35.2	1.25522
36.3	1.25468
37.4	1.28953
38.5	1.26322
39.6	1.28128
40.7	1.27067
41.8	1.28087
42.9	1.26614
44	1.2553
45.1	1.26557
46.2	1.26525
47.3	1.2279
48.4	1.22867
49.5	1.24744
50.6	1.25086
51.7	1.24926
52.8	1.2652
53.9	1.27424
55	1.27434
56.1	1.26053
57.2	1.23776
58.3	1.24646
59.4	1.26075
60.5	1.24306
61.6	1.24919
62.7	1.27294
63.8	1.27523
64.9	1.28884
66	1.28669
67.1	1.29243
68.2	1.25046
69.3	1.28347
70.4	1.25136
71.5	1.25893
72.6	1.26537
73.7	1.25845
74.8	1.24396
75.9	1.28333
77	1.28992
78.1	1.26854
79.2	1.28418
80.3	1.29201
81.4	1.29799
82.5	1.26935
83.6	1.27473
84.7	1.27754
85.8	1.26671
86.9	1.29124
88	1.28494
89.1	1.27537
90.2	1.28365
91.3	1.26967
92.4	1.2594
93.5	1.27673
94.6	1.27609
95.7	1.2801
96.8	1.30596
97.9	1.27413
99	1.27816
100.1	1.27535
101.2	1.28439
102.3	1.27805
103.4	1.27545
104.5	1.29966
105.6	1.29069
106.7	1.28903
107.8	1.30705
108.9	1.29557
110	1.29568
111.1	1.26801
112.2	1.26974
113.3	1.28715
114.4	1.28525
115.5	1.28897
116.6	1.29058
117.7	1.28135
118.8	1.26965
119.9	1.27634
121	1.28598
122.1	1.32308
123.2	1.3018
124.3	1.3039
125.4	1.29808
126.5	1.29361
127.6	1.32182
128.7	1.31212
129.8	1.299
130.9	1.28838
132	1.29966
133.1	1.29179
134.2	1.29368
135.3	1.32478
136.4	1.30454
137.5	1.31937
138.6	1.32458
139.7	1.33151
140.8	1.30684
141.9	1.27051
143	1.32307
144.1	1.31743
145.2	1.3117
146.3	1.30481
147.4	1.29671
148.5	1.2971
149.6	1.2918
150.7	1.30774
151.8	1.30515
152.9	1.32869
154	1.30932
155.1	1.32224
156.2	1.31069
157.3	1.30433
158.4	1.31363
159.5	1.29702
160.6	1.3176
161.7	1.31664
162.8	1.32839
163.9	1.33268
165	1.31965
166.1	1.31731
167.2	1.31787
168.3	1.34029
169.4	1.32813
170.5	1.32038
171.6	1.32925
172.7	1.32682
173.8	1.30993
174.9	1.30613
176	1.32153
177.1	1.31312
178.2	1.30431
179.3	1.29579
180.4	1.32932
181.5	1.31264
182.6	1.30106
183.7	1.30182
184.8	1.31139
185.9	1.32531
187	1.31182
188.1	1.29628
189.2	1.33068
190.3	1.31432
191.4	1.31546
192.5	1.29081
193.6	1.31392
194.7	1.32628
195.8	1.32643
196.9	1.30328
198	1.30711
199.1	1.30682
200.2	1.32044
201.3	1.29609
202.4	1.30753
203.5	1.30791
204.6	1.30667
205.7	1.302
206.8	1.32445
207.9	1.30736
209	1.33439
210.1	1.31273
211.2	1.31398
212.3	1.31318
213.4	1.2896
214.5	1.32934
215.6	1.31288
216.7	1.31287
217.8	1.33958
218.9	1.32309
220	1.3369
221.1	1.30718
222.2	1.29584
223.3	1.29256
224.4	1.30833
225.5	1.32493
226.6	1.30547
227.7	1.29631
228.8	1.28599
229.9	1.31968
231	1.29557
232.1	1.30344
233.2	1.28582
234.3	1.29556
235.4	1.30276
236.5	1.3146
237.6	1.2955
238.7	1.32766
239.8	1.32539
240.9	1.29765
242	1.30936
243.1	1.31188
244.2	1.29072
245.3	1.33127
246.4	1.30382
247.5	1.30105
248.6	1.31718
249.7	1.32325
250.8	1.32351
251.9	1.33306
253	1.31176
254.1	1.31425
255.2	1.3152
256.3	1.31212
257.4	1.33341
258.5	1.33867
259.6	1.29032
260.7	1.27824
261.8	1.29691
262.9	1.29517
264	1.32092
265.1	1.31293
266.2	1.29528
267.3	1.31064
268.4	1.31639
269.5	1.29869
270.6	1.30728
271.7	1.31156
272.8	1.30763
273.9	1.32952
275	1.31683
276.1	1.30596
277.2	1.34053
278.3	1.32936
279.4	1.31626
280.5	1.33041
281.6	1.32174
282.7	1.31593
283.8	1.32579
284.9	1.29284
286	1.32359
287.1	1.32417
288.2	1.30845
289.3	1.29784
290.4	1.31892
291.5	1.33655
292.6	1.30787
293.7	1.32393
294.8	1.3136
295.9	1.31291
297	1.31909
298.1	1.32586
299.2	1.34098
300.3	1.32892
301.4	1.32026
302.5	1.33014
303.6	1.32957
304.7	1.34333
305.8	1.32556
306.9	1.33872
308	1.32541
309.1	1.31596
310.2	1.34292
311.3	1.34838
312.4	1.34061
313.5	1.33687
314.6	1.35237
315.7	1.3334
316.8	1.3413
317.9	1.32944
319	1.35789
320.1	1.37533
321.2	1.33168
322.3	1.32555
323.4	1.34422
324.5	1.33162
325.6	1.33698
326.7	1.32611
327.8	1.34386
328.9	1.33576
330	1.32953
331.1	1.34042
332.2	1.32472
333.3	1.35501
334.4	1.35014
335.5	1.32195
336.6	1.35322
337.7	1.33123
338.8	1.33201
339.9	1.34895
341	1.37822
342.1	1.36087
343.2	1.34867
344.3	1.33644
345.4	1.33573
346.5	1.3729
347.6	1.37227
348.7	1.35312
349.8	1.35696
350.9	1.36133
352	1.34498
353.1	1.34837
354.2	1.33455
355.3	1.35875
356.4	1.33052
357.5	1.35375
358.6	1.36359
359.7	1.35783
360.8	1.35858
361.9	1.37395
363	1.3698
364.1	1.3666
365.2	1.34665
366.3	1.35509
367.4	1.3842
368.5	1.3414
369.6	1.36544
370.7	1.39511
371.8	1.38243
372.9	1.40544
374	1.38037
375.1	1.37549
376.2	1.39369
377.3	1.35752
378.4	1.37328
379.5	1.38215
380.6	1.38336
381.7	1.38305
382.8	1.38544
383.9	1.42787
385	1.40402
386.1	1.37439
387.2	1.37855
388.3	1.37567
389.4	1.39671
390.5	1.40582
391.6	1.40046
392.7	1.40587
393.8	1.40472
394.9	1.39082
396	1.41085
397.1	1.39501
398.2	1.40258
399.3	1.40523
400.4	1.4051
401.5	1.39297
402.6	1.39223
403.7	1.42798
404.8	1.3958
405.9	1.38971
407	1.39812
408.1	1.39034
409.2	1.41351
410.3	1.43897
411.4	1.38807
412.5	1.40714
413.6	1.40812
414.7	1.39307
415.8	1.4182
416.9	1.42443
418	1.41302
419.1	1.40423
420.2	1.39467
421.3	1.40726
422.4	1.42299
423.5	1.41548
424.6	1.39836
425.7	1.40906
426.8	1.42369
427.9	1.42835
429	1.41091
430.1	1.39794
431.2	1.41107
432.3	1.39925
433.4	1.39187
434.5	1.40732
435.6	1.39249
436.7	1.40074
437.8	1.40522
438.9	1.41992
440	1.41147
441.1	1.39416
442.2	1.40246
443.3	1.40413
444.4	1.38648
445.5	1.40226
446.6	1.43693
447.7	1.45247
448.8	1.43422
449.9	1.42735
451	1.39655
452.1	1.40731
453.2	1.37885
454.3	1.38798
455.4	1.41474
456.5	1.39901
457.6	1.44083
458.7	1.41309
459.8	1.42175
460.9	1.40657
462	1.41061
463.1	1.40113
464.2	1.40076
465.3	1.41241
466.4	1.42637
467.5	1.41225
468.6	1.40644
469.7	1.41867
470.8	1.43109
471.9	1.41441
473	1.40076
474.1	1.38887
475.2	1.39302
476.3	1.40932
477.4	1.38778
478.5	1.37675
479.6	1.41407
480.7	1.41588
481.8	1.39607
482.9	1.38979
484	1.39215
485.1	1.38566
486.2	1.3976
487.3	1.37905
488.4	1.38572
489.5	1.3609
490.6	1.35963
491.7	1.37992
492.8	1.39852
493.9	1.39085
495	1.37511
496.1	1.38321
497.2	1.36207
498.3	1.36964
499.4	1.36499
500.5	1.37899
501.6	1.37818
502.7	1.34777
503.8	1.34346
504.9	1.36885
506	1.3446
507.1	1.34288
508.2	1.33923
509.3	1.3346
510.4	1.3683
511.5	1.36086
512.6	1.35664
513.7	1.33571
514.8	1.34329
515.9	1.33983
517	1.32864
518.1	1.34541
519.2	1.34709
520.3	1.35477
521.4	1.3108
522.5	1.31858
523.6	1.32242
524.7	1.34147
525.8	1.31656
526.9	1.30666
528	1.29699
529.1	1.30597
530.2	1.32908
531.3	1.29633
532.4	1.31423
533.5	1.32363
534.6	1.30052
535.7	1.30675
536.8	1.30524
537.9	1.3257
539	1.32336
540.1	1.2886
541.2	1.2854
542.3	1.28892
543.4	1.28287
544.5	1.28681
545.6	1.28883
546.7	1.28471
547.8	1.27641
548.9	1.26151
550	1.27074
551.1	1.31156
552.2	1.27709
553.3	1.28068
554.4	1.29379
555.5	1.28629
556.6	1.28728
557.7	1.28875
558.8	1.29469
559.9	1.28428
561	1.29617
562.1	1.29603
563.2	1.29119
564.3	1.25803
565.4	1.24499
566.5	1.28262
567.6	1.27409
568.7	1.28275
569.8	1.26764
570.9	1.27212
572	1.26336
573.1	1.26531
574.2	1.26064
575.3	1.24438
576.4	1.23319
577.5	1.26341
578.6	1.24549
579.7	1.26042
580.8	1.23522
581.9	1.26085
583	1.24773
584.1	1.23959
585.2	1.23043
586.3	1.23275
587.4	1.23241
588.5	1.24878
589.6	1.24102
590.7	1.26011
591.8	1.27149
592.9	1.26341
594	1.23813
595.1	1.22784
596.2	1.24296
597.3	1.23724
598.4	1.23503
599.5	1.24274
600.6	1.22401
601.7	1.20748
602.8	1.24642
603.9	1.22429
605	1.20593
606.1	1.24014
607.2	1.22264
608.3	1.22194
609.4	1.2465
610.5	1.24081
611.6	1.21981
612.7	1.21728
613.8	1.21615
614.9	1.23196
616	1.20708
617.1	1.23374
618.2	1.23319
619.3	1.21947
620.4	1.19639
621.5	1.21983
622.6	1.21916
623.7	1.21723
624.8	1.22137
625.9	1.19762
627	1.20224
628.1	1.18833
629.2	1.184
630.3	1.21469
631.4	1.21482
632.5	1.20847
633.6	1.18867
634.7	1.23098
635.8	1.20899
636.9	1.20864
638	1.19686
639.1	1.18797
640.2	1.18687
641.3	1.196
642.4	1.19299
643.5	1.21096
644.6	1.19294
645.7	1.19598
646.8	1.22244
647.9	1.21639
649	1.20728
650.1	1.20152
651.2	1.20389
652.3	1.20655
653.4	1.20255
654.5	1.18873
655.6	1.20894
656.7	1.17642
657.8	1.19176
658.9	1.18162
660	1.17672
661.1	1.17591
662.2	1.19912
663.3	1.19345
664.4	1.19979
665.5	1.1592
666.6	1.14056
667.7	1.1602
668.8	1.18511
669.9	1.17682
671	1.16889
672.1	1.15932
673.2	1.16724
674.3	1.16782
675.4	1.17813
676.5	1.17487
677.6	1.16283
678.7	1.19013
679.8	1.17834
680.9	1.16791
682	1.18078
683.1	1.17085
684.2	1.1664
685.3	1.15706
686.4	1.14738
687.5	1.14735
688.6	1.16587
689.7	1.1758
690.8	1.16534
691.9	1.15939
693	1.15111
694.1	1.1483
695.2	1.1766
696.3	1.15241
697.4	1.14945
698.5	1.15946
699.6	1.15269
700.7	1.12721
701.8	1.14591
702.9	1.144
704	1.14334
705.1	1.17078
706.2	1.14443
707.3	1.14203
708.4	1.1279
709.5	1.1565
710.6	1.13434
711.7	1.15056
712.8	1.14528
713.9	1.13921
715	1.14471
716.1	1.15327
717.2	1.13857
718.3	1.13363
719.4	1.12089
720.5	1.14505
721.6	1.15964
722.7	1.12855
723.8	1.1384
724.9	1.11876
726	1.1169
727.1	1.13035
728.2	1.11954
729.3	1.10161
730.4	1.1297
731.5	1.13842
732.6	1.13069
733.7	1.13183
734.8	1.13797
735.9	1.1343
737	1.12981
738.1	1.10705
739.2	1.10465
740.3	1.10128
741.4	1.11411
742.5	1.11647
743.6	1.12724
744.7	1.12875
745.8	1.12696
746.9	1.14224
748	1.13065
749.1	1.11897
750.2	1.13485
751.3	1.12692
752.4	1.10771
753.5	1.10895
754.6	1.10573
755.7	1.12202
756.8	1.12594
757.9	1.11458
759	1.11883
760.1	1.14464
761.2	1.12816
762.3	1.11869
763.4	1.12497
764.5	1.12358
765.6	1.13275
766.7	1.13332
767.8	1.11512
768.9	1.1256
770	1.12295
771.1	1.12097
772.2	1.12606
773.3	1.11746
774.4	1.1119
775.5	1.09467
776.6	1.09806
777.7	1.09447
778.8	1.08732
779.9	1.08466
781	1.10995
782.1	1.10959
783.2	1.0938
784.3	1.123
785.4	1.13705
786.5	1.11782
787.6	1.13083
788.7	1.09706
789.8	1.09694
790.9	1.08361
792	1.09542
793.1	1.07486
794.2	1.10756
795.3	1.09632
796.4	1.08118
797.5	1.10444
798.6	1.11625
799.7	1.08394
800.8	1.08371
801.9	1.06652
803	1.07796
804.1	1.08237
805.2	1.105
806.3	1.09693
807.4	1.10762
808.5	1.08649
809.6	1.09554
810.7	1.09322
811.8	1.07386
812.9	1.10954
814	1.10181
815.1	1.10125
816.2	1.1022
817.3	1.07431
818.4	1.09916
819.5	1.09853
820.6	1.09775
821.7	1.08842
822.8	1.08108
823.9	1.08965
825	1.10209
826.1	1.10134
827.2	1.08911
828.3	1.07611
829.4	1.08352
830.5	1.08959
831.6	1.06733
832.7	1.05931
833.8	1.06466
834.9	1.0815
836	1.06578
837.1	1.07405
838.2	1.06909
839.3	1.07811
840.4	1.07162
841.5	1.05957
842.6	1.06562
843.7	1.0798
844.8	1.07045
845.9	1.07925
847	1.08234
848.1	1.08117
849.2	1.07734
850.3	1.08541
851.4	1.08963
852.5	1.08986
853.6	1.08842
854.7	1.07146
855.8	1.08914
856.9	1.07929
858	1.06285
859.1	1.0825
860.2	1.06624
861.3	1.07905
862.4	1.07268
863.5	1.08464
864.6	1.09382
865.7	1.07157
866.8	1.08862
867.9	1.12143
869	1.09419
870.1	1.07591
871.2	1.08087
872.3	1.07935
873.4	1.08437
874.5	1.07315
875.6	1.09302
876.7	1.08723
877.8	1.11311
878.9	1.10934
880	1.10067
881.1	1.08048
882.2	1.08842
883.3	1.09327
884.4	1.1014
885.5	1.08188
886.6	1.0785
887.7	1.08213
888.8	1.07593
889.9	1.09328
891	1.09694
892.1	1.07946
893.2	1.07114
894.3	1.08423
895.4	1.05087
896.5	1.07083
897.6	1.07312
898.7	1.09438
899.8	1.09824
900.9	1.0775
902	1.09524
903.1	1.09339
904.2	1.08717
905.3	1.08787
906.4	1.08122
907.5	1.06833
908.6	1.08548
909.7	1.06569
910.8	1.09826
911.9	1.08698
913	1.06919
914.1	1.08093
915.2	1.08272
916.3	1.07318
917.4	1.08316
918.5	1.08144
919.6	1.08137
920.7	1.07984
921.8	1.08571
922.9	1.08548
924	1.0701
925.1	1.08364
926.2	1.07926
927.3	1.07572
928.4	1.07001
929.5	1.06823
930.6	1.06985
931.7	1.09855
932.8	1.07052
933.9	1.0662
935	1.07847
936.1	1.07072
937.2	1.07206
938.3	1.07056
939.4	1.07817
940.5	1.07022
941.6	1.06327
942.7	1.05954
943.8	1.05349
944.9	1.06527
946	1.06244
947.1	1.06957
948.2	1.06338
949.3	1.06451
950.4	1.07703
951.5	1.0578
952.6	1.0733
953.7	1.08023
954.8	1.07082
955.9	1.07393
957	1.09204
958.1	1.08407
959.2	1.06832
960.3	1.09204
961.4	1.07492
962.5	1.06492
963.6	1.06624
964.7	1.07102
965.8	1.05602
966.9	1.0735
968	1.06921
969.1	1.06751
970.2	1.05994
971.3	1.05499
972.4	1.04075
973.5	1.04084
974.6	1.06948
975.7	1.04474
976.8	1.04642
977.9	1.05698
979	1.05647
980.1	1.04912
981.2	1.06567
982.3	1.09671
983.4	1.06898
984.5	1.08046
985.6	1.07015
986.7	1.07512
987.8	1.05206
988.9	1.06656
990	1.06881
991.1	1.06642
992.2	1.04446
993.3	1.06354
994.4	1.05721
995.5	1.07921
996.6	1.05915
997.7	1.05699
998.8	1.05908
999.9	1.03362
1001	1.08479
1002.1	1.07574
1003.2	1.0621
1004.3	1.06706
1005.4	1.05539
1006.5	1.07348
1007.6	1.05845
1008.7	1.05575
1009.8	1.05629
1010.9	1.07002
1012	1.08003
1013.1	1.06969
1014.2	1.06234
1015.3	1.0553
1016.4	1.05317
1017.5	1.06763
1018.6	1.05552
1019.7	1.05072
1020.8	1.07828
1021.9	1.07933
1023	1.06514
1024.1	1.05604
1025.2	1.04435
1026.3	1.05112
1027.4	1.05378
1028.5	1.05314
1029.6	1.05119
1030.7	1.0453
1031.8	1.06425
1032.9	1.06706
1034	1.07536
1035.1	1.06754
1036.2	1.06748
1037.3	1.06862
1038.4	1.06953
1039.5	1.06869
1040.6	1.05985
1041.7	1.06876
1042.8	1.05323
1043.9	1.02945
1045	1.07032
1046.1	1.05505
1047.2	1.05018
1048.3	1.06926
1049.4	1.05263
1050.5	1.05173
1051.6	1.04828
1052.7	1.03715
1053.8	1.0456
1054.9	1.0405
1056	1.04911
1057.1	1.0583
1058.2	1.06195
1059.3	1.0521
1060.4	1.03783
1061.5	1.04257
1062.6	1.04538
1063.7	1.04594
1064.8	1.05296
1065.9	1.03162
1067	1.05363
1068.1	1.0594
1069.2	1.04065
1070.3	1.04452
1071.4	1.06029
1072.5	1.05903
1073.6	1.03764
1074.7	1.05972
1075.8	1.05333
1076.9	1.07292
1078	1.0517
1079.1	1.04733
1080.2	1.04598
1081.3	1.04901
1082.4	1.06025
1083.5	1.06307
1084.6	1.04229
1085.7	1.04689
1086.8	1.04736
1087.9	1.04059
1089	1.06207
1090.1	1.03489
1091.2	1.04448
1092.3	1.05579
1093.4	1.04889
1094.5	1.0313
1095.6	1.01926
1096.7	1.0274
1097.8	1.04132
1098.9	1.0398
1100	1.04114
1101.1	1.03057
1102.2	1.04516
1103.3	1.05671
1104.4	1.05618
1105.5	1.05561
1106.6	1.03102
1107.7	1.02994
1108.8	1.03715
1109.9	1.03449
1111	1.01724
1112.1	1.03862
1113.2	1.04824
1114.3	1.04832
1115.4	1.03259
1116.5	1.0305
1117.6	1.02704
1118.7	1.05526
1119.8	1.04639
1120.9	1.04481
1122	1.03745
1123.1	1.02837
1124.2	1.04545
1125.3	1.0396
1126.4	1.03556
1127.5	1.03751
1128.6	1.04131
1129.7	1.02632
1130.8	1.03221
1131.9	1.04918
1133	1.0446
1134.1	1.05043
1135.2	1.04969
1136.3	1.03841
1137.4	1.06415
1138.5	1.04174
1139.6	1.04745
1140.7	1.03529
1141.8	1.03352
1142.9	1.02123
1144	1.01514
1145.1	1.03646
1146.2	1.04528
1147.3	1.02263
1148.4	1.04085
1149.5	1.03817
1150.6	1.02249
1151.7	1.05075
1152.8	1.02693
1153.9	1.04839
1155	1.02377
1156.1	1.03795
1157.2	1.05193
1158.3	1.02553
1159.4	1.01249
1160.5	1.00602
1161.6	1.03219
1162.7	1.02348
1163.8	1.03153
1164.9	1.02519
1166	1.03903
1167.1	1.02902
1168.2	1.04198
1169.3	1.03249
1170.4	1.05542
1171.5	1.02003
1172.6	0.949066
1173.7	0.938522
1174.8	0.937925
1175.9	0.936731
1177	0.92284
1178.1	0.901535
1179.2	0.928834
1180.3	0.9234
1181.4	0.907064
1182.5	0.900855
1183.6	0.922943
1184.7	0.93311
1185.8	0.925275
1186.9	0.91656
1188	0.928063
1189.1	0.93522
1190.2	0.926258
1191.3	0.939881
1192.4	0.92453
1193.5	0.919851
1194.6	0.937381
1195.7	0.916106
1196.8	0.920918
1197.9	0.931617
1199	0.933572
1200.1	0.912702
1201.2	0.923709
