# Supplementary material for: The AUX1-AFB1-CNGC14 module establishes a longitudinal root surface pH profile
Source: eLife. 2023 Jul 14;12:e85193. doi: 10.7554/eLife.85193 (PMC10414970; doi:10.7554/eLife.85193)
Supplement: Figure 2—figure supplement 2—source data 1. [file elife-85193-fig2-figsupp2-data1.xlsx]

## Sheet: S2-2a
condition	length (µm)	elongation (µm/min)
Control	102.27	3.409
Control	118.82	3.96067
Control	120.358	4.01193
Control	95.237	3.17457
Control	106.717	3.55723
Control	77.968	2.59893
Control	81.667	2.72223
Control	94.83	3.161
Control	114.59	3.81967
Control	122.609	4.08697
Control	106.171	3.53903
Control	127.676	4.25587
Control	110	3.66667
Control	97.124	3.23747
Control	81.756	2.7252
Control	117.921	3.9307
Control	119.531	3.98437
Control	91.927	3.06423
Fusicoccin	141.93	4.731
Fusicoccin	133.64	4.45467
Fusicoccin	158.4	5.28
Fusicoccin	148.887	4.9629
Fusicoccin	198.781	6.62603
Fusicoccin	163.171	5.43903
Fusicoccin	120.82	4.02733
Fusicoccin	170.823	5.6941
Fusicoccin	167.561	5.58537
Fusicoccin	126.954	4.2318
Fusicoccin	143.675	4.78917
Fusicoccin	120.097	4.00323
Fusicoccin	151.72	5.05733
Fusicoccin	153.764	5.12547
Fusicoccin	143.422	4.78073
Fusicoccin	159.769	5.32563
Fusicoccin	143.608	4.78693
Fusicoccin	147.662	4.92207
Fusicoccin	142.661	4.75537
Fusicoccin	154.471	5.14903
Fusicoccin	116.184	3.8728
Fusicoccin	144.079	4.80263
Fusicoccin	158.949	5.2983
Fusicoccin	141.417	4.7139
Fusicoccin	137.196	4.5732
Fusicoccin	157.496	5.24987
Fusicoccin	140.007	4.6669
Fusicoccin	137.196	4.5732
Fusicoccin	155.002	5.16673
Fusicoccin	144.682	4.82273
Fusicoccin	146.279	4.87597
Fusicoccin	137.46	4.582
Fusicoccin	153.764	5.12547
Fusicoccin	167.33	5.57767
Fusicoccin	147.055	4.90183
Fusicoccin	164	5.46667
Fusicoccin	158.919	5.2973
Fusicoccin	149.163	4.9721
Fusicoccin	147.466	4.91553
Control	108.248	3.60827
Control	116.163	3.8721
Control	106.626	3.5542
Control	107.89	3.59633
Control	94.061	3.13537
Control	93.468	3.1156
Control	97.025	3.23417
Control	107.89	3.59633
Control	68.235	2.2745
Control	80.081	2.66937
Control	100.937	3.36457
Control	70.434	2.3478
Control	79.231	2.64103
Control	68.519	2.28397
Control	64.704	2.1568
Control	92.635	3.08783

## Sheet: S2-2b
Genotype_Condition	Lenght (µm)	Elongation (µm/min)
col_cm	178.322	3.56644
col_cm	147.908	2.95816
col_cm	212.671	4.25342
col_cm	175.052	3.50104
col_cm	208.948	4.17896
col_cm	203.17	4.0634
col_cm	199.901	3.99802
col_cm	223.884	4.47768
col_cm	165.458	3.30916
col_cm	175.18	3.5036
col_iaa	146.99	2.9398
col_iaa	133.559	2.67118
col_iaa	107.85	2.157
col_iaa	112.399	2.24798
col_iaa	119.212	2.38424
col_iaa	124.222	2.48444
col_iaa	90.24	1.8048
col_iaa	104.587	2.09174
col_iaa	142.733	2.85466
col_iaa	140.404	2.80808
aha_cm	175.484	3.50968
aha_cm	220.036	4.40072
aha_cm	184.656	3.69312
aha_cm	188.922	3.77844
aha_cm	182.641	3.65282
aha_cm	213.774	4.27548
aha_cm	279.428	5.58856
aha_cm	233.573	4.67146
aha_cm	217.889	4.35778
aha_iaa	77.634	1.55268
aha_iaa	163.915	3.2783
aha_iaa	212.12	4.2424
aha_iaa	128.716	2.57432
aha_iaa	150.004	3.00008
aha_iaa	197.788	3.95576
aha_iaa	154.916	3.09832
aha_iaa	150.8	3.016
aha_iaa	151.66	3.0332
aha_iaa	200.565	4.0113
pp2c_cm	145.441	2.90882
pp2c_cm	146.61	2.9322
pp2c_cm	179.485	3.5897
pp2c_cm	187.477	3.74954
pp2c_cm	155.33	3.1066
pp2c_iaa	99.055	1.9811
pp2c_iaa	93.613	1.87226
pp2c_iaa	75.814	1.51628
pp2c_iaa	80.96	1.6192
pp2c_iaa	85.616	1.71232
pp2c_iaa	73.882	1.47764
pp2c_iaa	85.363	1.70726
pp2c_iaa	85.913	1.71826
col_cm	88.828	2.96093
col_cm	81.504	2.7168
col_cm	90.981	3.0327
col_cm	87.462	2.9154
col_cm	82.968	2.7656
col_cm	102.341	3.41137
col_cm	88.555	2.95183
col_cm	96.881	3.22937
col_cm	92.9	3.09667
col_cm	111.296	3.70987
col_iaa	64.008	2.1336
col_iaa	62.998	2.09993
col_iaa	54.614	1.82047
col_iaa	66.329	2.21097
col_iaa	55.973	1.86577
col_iaa	60.179	2.00597
col_iaa	62.71	2.09033
col_iaa	62.574	2.0858
col_iaa	67.826	2.26087
col_iaa	54.802	1.82673
aha_cm	128.808	4.2936
aha_cm	109.122	3.6374
aha_cm	124.36	4.14533
aha_cm	144.146	4.80487
aha_cm	70.948	2.36493
aha_cm	147.58	4.91933
aha_cm	151.724	5.05747
aha_cm	95.433	3.1811
aha_cm	85.807	2.86023
aha_cm	98.516	3.28387
aha_iaa	114.199	3.80663
aha_iaa	109.41	3.647
aha_iaa	98.829	3.2943
aha_iaa	89.287	2.97623
aha_iaa	101.2	3.37333
aha_iaa	74.557	2.48523
aha_iaa	99.269	3.30897
aha_iaa	65.002	2.16673
aha_iaa	85.411	2.84703
pp2c_cm	100.203	3.3401
pp2c_cm	72.107	2.40357
pp2c_cm	69.265	2.30883
pp2c_cm	55.241	1.84137
pp2c_cm	68.466	2.2822
pp2c_iaa	41.422	1.38073
pp2c_iaa	34.667	1.15557
pp2c_iaa	37.978	1.26593
pp2c_iaa	34.457	1.14857
pp2c_iaa	40.7	1.35667
pp2c_iaa	40.878	1.3626
pp2c_iaa	42.031	1.40103
pp2c_iaa	57.242	1.90807
col_cm	129.127	4.30423
col_cm	150.764	5.02547
col_cm	120.624	4.0208
col_cm	123.597	4.1199
col_cm	113.981	3.79937
col_cm	117.118	3.90393
col_cm	117.582	3.9194
col_cm	101.659	3.38863
col_cm	112.178	3.73927
col_cm	118.622	3.95407
col_iaa	86.352	2.8784
col_iaa	60.028	2.00093
col_iaa	81.667	2.72223
col_iaa	69.683	2.32277
col_iaa	74.873	2.49577
col_iaa	79.391	2.64637
col_iaa	73.313	2.44377
col_iaa	71.838	2.3946
col_iaa	68.209	2.27363
col_iaa	64.9	2.16333
aha_cm	138.486	4.6162
aha_cm	141.417	4.7139
aha_cm	149.232	4.9744
aha_cm	174.914	5.83047
aha_cm	210.982	7.03273
aha_cm	136.342	4.54473
aha_cm	166.229	5.54097
aha_cm	164.651	5.48837
aha_cm	155.971	5.19903
aha_iaa	77.282	2.57607
aha_iaa	95.237	3.17457
aha_iaa	122.436	4.0812
aha_iaa	141.904	4.73013
aha_iaa	132.005	4.40017
aha_iaa	151.565	5.05217
aha_iaa	96.33	3.211
aha_iaa	97.925	3.26417
aha_iaa	100.745	3.35817
pp2c_cm	77.782	2.59273
pp2c_cm	60.41	2.01367
pp2c_cm	75.252	2.5084
pp2c_cm	50.168	1.67227
pp2c_iaa	39.062	1.30207
pp2c_iaa	40.357	1.34523
pp2c_iaa	54.269	1.80897

## Sheet: S2-2d
distance from root tip (µm)	0	20	40	60	80	100	120	140	160	180	200	220	240	260	280	300	320	340	360	380	400	420	440	460	480	500	520	540	560	580	600	620	640	660	680	700	720	740	760	780	800
col_cm	0.967613	0.971672	0.977849	0.971215	0.971157	0.977238	0.986693	0.985325	1.00509	1.02176	1.02725	1.03318	1.03903	1.04415	1.05887	1.06638	1.06445	1.05618	1.04448	1.02735	1.00916	0.993171	0.974084	0.959295	0.94132	0.928856	0.917282	0.911437	0.902068	0.8943	0.888236	0.878368	0.873724	0.869154	0.864314	0.854335	0.847731	0.845325	0.839893	0.838769	0.834829
col_cm	0.982876	0.988529	0.995814	1.00911	1.01647	1.02069	1.03084	1.03667	1.0413	1.04511	1.05008	1.04993	1.03812	1.04275	1.06553	1.07597	1.07383	1.06643	1.0541	1.03104	1.01286	0.988533	0.968788	0.957459	0.942643	0.925886	0.915504	0.909561	0.908358	0.90074	0.888626	0.877802	0.865274	0.858461	0.848631	0.838616	0.835788	0.829867	0.829224	0.824801	0.825257
col_cm	0.988476	0.995317	0.993295	0.99641	0.999714	1.00947	1.01315	1.01904	1.02463	1.02777	1.02545	1.02852	1.03874	1.04956	1.05874	1.06935	1.07098	1.07296	1.07405	1.06151	1.04781	1.03463	1.01861	1.00162	0.983839	0.970121	0.956158	0.947331	0.934049	0.920629	0.91031	0.900946	0.894187	0.880698	0.880644	0.87069	0.870402	0.863386	0.85709	0.850954	0.851521
col_cm	1.00299	1.01047	1.01711	1.02771	1.02887	1.03634	1.04522	1.05936	1.06679	1.06774	1.07496	1.07322	1.08197	1.09106	1.09389	1.09567	1.09873	1.10031	1.09557	1.08652	1.06513	1.04692	1.02741	1.00706	0.991415	0.97634	0.963807	0.951509	0.941115	0.932016	0.922675	0.914615	0.908394	0.900592	0.896325	0.885302	0.878734	0.874928	0.872464	0.867363	0.864087
col_cm	1.00815	1.01482	1.02239	1.02858	1.03678	1.04367	1.04402	1.03072	1.03832	1.04015	1.03881	1.06469	1.08945	1.09272	1.09727	1.09854	1.09788	1.09574	1.08444	1.06636	1.04488	1.03081	1.01609	0.996023	0.979143	0.966294	0.956725	0.944549	0.93696	0.93117	0.927258	0.920483	0.911789	0.905331	0.90306	0.891929	0.88332	0.878363	0.871279	0.867484	0.861625
col_cm	1.00357	1.00882	1.01379	1.01082	1.01297	1.01897	1.02039	1.0214	1.02618	1.02837	1.03504	1.04426	1.0464	1.0573	1.06329	1.07147	1.07897	1.0796	1.07817	1.07166	1.0586	1.04713	1.03015	1.00912	0.991714	0.977037	0.966299	0.957393	0.949115	0.941779	0.937965	0.928316	0.923972	0.916296	0.914485	0.906549	0.903195	0.894026	0.888974	0.884877	0.873267
col_cm	1.02506	1.03144	1.03924	1.04776	1.05807	1.06649	1.07455	1.0809	1.08545	1.08874	1.09489	1.10118	1.1075	1.10914	1.11588	1.11977	1.12026	1.11537	1.09791	1.077	1.05124	1.03017	1.00882	0.99318	0.978596	0.960754	0.950969	0.939536	0.931522	0.919286	0.909525	0.906541	0.897322	0.893862	0.889654	0.884379	0.877579	0.87034	0.870892	0.866827	0.864602
col_cm	1.0027	1.00091	0.998273	1.00603	1.00872	1.01221	1.02855	1.03751	1.03902	1.04092	1.05625	1.0708	1.08175	1.09368	1.10112	1.11054	1.11803	1.12557	1.12364	1.11912	1.11369	1.10191	1.08909	1.06528	1.04216	1.02229	1.00799	0.99075	0.970504	0.959013	0.946463	0.935839	0.930263	0.920611	0.913124	0.900307	0.892118	0.885896	0.876104	0.868063	0.857313
col_cm	1.00421	1.00957	1.01617	1.01911	1.02785	1.01908	1.01754	1.02125	1.02476	1.04893	1.06753	1.06897	1.0748	1.07071	1.07191	1.07193	1.0596	1.0508	1.03152	1.01799	1.00214	0.984299	0.973958	0.963938	0.948519	0.936878	0.929276	0.919962	0.912486	0.899032	0.888807	0.882391	0.87202	0.866113	0.856034	0.850118	0.842952	0.839695	0.837077	0.836615	0.836798
col_cm	1.01436	1.01631	1.02099	1.02258	1.03244	1.0451	1.04594	1.04957	1.0544	1.05927	1.0649	1.07118	1.0766	1.07435	1.08473	1.08143	1.08274	1.0846	1.08453	1.0832	1.07283	1.05233	1.0353	1.01414	1.00372	0.99044	0.981706	0.972243	0.960955	0.952557	0.943378	0.937832	0.929905	0.925185	0.916025	0.908205	0.905036	0.896909	0.886158	0.878399	0.873705
col_cm	1.00201	0.997181	0.994575	0.989452	0.985693	0.981612	0.973902	0.973168	0.97746	0.978708	0.97634	0.98204	0.99307	0.992882	1.00264	1.0026	1.00192	1.00562	1.005	1.01674	1.00925	1.00261	1.00207	1.00616	1.00418	0.993586	0.985593	0.974233	0.968528	0.958193	0.949286	0.940254	0.937605	0.926459	0.922127	0.919142	0.907288	0.897308	0.887835	0.885431	0.880925
col_cm	0.998685	1.001	0.997927	0.999664	1.0012	0.998042	1.00108	1.01027	1.00835	1.00046	1.00021	1.00655	1.01512	1.02141	1.02018	1.02398	1.02394	1.01701	1.00969	0.994635	0.986277	0.975189	0.958972	0.952361	0.94728	0.937919	0.928694	0.921408	0.914215	0.907242	0.899519	0.895408	0.88922	0.880787	0.882752	0.871303	0.864363	0.863889	0.859328	0.850506	0.848798
col_cm	0.967755	0.966068	0.960957	0.963092	0.95995	0.955553	0.961835	0.962234	0.969377	0.972125	0.971049	0.973219	0.97708	0.981903	0.980694	0.977346	0.984695	0.986661	0.981524	0.976706	0.973358	0.968659	0.963989	0.957761	0.945025	0.937816	0.92639	0.918734	0.905103	0.900606	0.894175	0.884291	0.8812	0.87308	0.867591	0.857616	0.848454	0.846266	0.845122	0.841463	0.838108
col_cm	1.009	1.01331	1.01277	1.00965	1.01301	1.00463	1.00988	1.00068	1.00082	0.999823	1.00186	1.00134	1.00606	1.00734	1.01627	1.02277	1.02531	1.02979	1.02402	1.02224	1.02394	1.01756	1.01678	1.01188	0.997717	0.991847	0.982939	0.968414	0.957812	0.940387	0.932076	0.922278	0.90975	0.906433	0.896671	0.892287	0.885757	0.868313	0.862925	0.865896	0.855146
col_cm	0.995539	0.992404	0.989975	0.984246	0.983748	0.98022	0.980969	0.983655	0.990865	0.993944	1.00043	1.00815	1.0234	1.02539	1.03169	1.03664	1.04272	1.04108	1.04054	1.03252	1.01419	1.00277	0.997351	0.98994	0.981331	0.966214	0.959104	0.942541	0.932198	0.923594	0.916379	0.906909	0.901446	0.885734	0.868464	0.860761	0.850373	0.842492	0.836716	0.833828	0.830811
col_cm	1.01237	1.01448	1.01487	1.0165	1.02112	1.02658	1.02888	1.03132	1.0279	1.02731	1.02938	1.02763	1.02556	1.05425	1.06306	1.05674	1.05714	1.04954	1.03554	1.0188	0.997542	0.985292	0.96925	0.961147	0.946817	0.93397	0.927906	0.92596	0.911905	0.907179	0.898544	0.892368	0.892443	0.881881	0.882273	0.878714	0.876826	0.871835	0.870778	0.868708	0.864385
col_cm	1.02013	1.01595	1.0211	1.02539	1.02391	1.02109	1.01956	1.0159	1.01727	1.02088	1.02193	1.031	1.04116	1.0412	1.04977	1.05145	1.03163	1.01456	0.998279	1.00077	1.01238	0.994076	0.978373	0.969642	0.954116	0.937215	0.925163	0.91548	0.906305	0.896953	0.880495	0.872789	0.866585	0.857463	0.849213	0.837966	0.830375	0.826038	0.819513	0.822108	0.817279
col_cm	1.0072	1.01011	1.01147	1.00697	1.00692	1.003	1.00454	1.00557	1.0128	1.00993	1.01824	1.02279	1.02914	1.03567	1.04176	1.04774	1.0544	1.054	1.05622	1.05645	1.05738	1.05066	1.03816	1.02854	1.00935	1.00187	0.991386	0.975049	0.965183	0.95582	0.943738	0.932108	0.916462	0.904849	0.894002	0.882791	0.877848	0.86402	0.856285	0.853631	0.845276
col_cm	1.00543	1.00305	0.998792	1.00215	0.998331	1.00883	1.0121	1.01763	1.02385	1.02215	1.03389	1.03863	1.04452	1.05016	1.04651	1.03781	1.02842	1.02466	1.02007	1.00197	0.981887	0.975509	0.967355	0.956733	0.945634	0.935548	0.926619	0.924903	0.918801	0.911575	0.904222	0.88953	0.882681	0.877271	0.872708	0.875873	0.867758	0.865454	0.861562	0.860519	0.860824
col_cm	0.981886	0.977909	0.970964	0.968848	0.962061	0.965043	0.971237	0.989452	1.00095	1.00925	1.01527	1.02526	1.0292	1.03854	1.04785	1.05608	1.06546	1.07768	1.07671	1.06781	1.04775	1.02374	1.00897	0.995061	0.980909	0.965516	0.953593	0.945422	0.937545	0.924398	0.913037	0.907062	0.89738	0.88981	0.885602	0.878943	0.870843	0.865763	0.864001	0.86624	0.861149
col_cm	1.00605	1.00703	1.0157	1.01235	1.01007	1.01067	1.00753	1.00983	1.01065	1.01146	1.01464	1.01766	1.02677	1.03276	1.04003	1.0482	1.05713	1.05638	1.05273	1.04374	1.024	1.00465	0.993404	0.970362	0.95887	0.946127	0.932217	0.926436	0.918084	0.909964	0.905859	0.894184	0.885156	0.880428	0.8737	0.87044	0.866808	0.859429	0.855815	0.85179	0.838623
col_cm	0.995456	0.997561	0.997829	0.992655	0.989096	0.985714	0.971607	0.972229	0.975525	0.977729	0.984337	0.985425	0.993645	0.99525	1.00175	1.00837	1.01237	1.01663	1.01688	1.00318	1.0113	0.998442	0.98412	0.962304	0.960965	0.950027	0.931045	0.913111	0.897824	0.886318	0.873991	0.86758	0.862249	0.85709	0.85615	0.851981	0.843488	0.844114	0.84129	0.838583	0.837371
col_cm	1.00546	1.00402	1.00455	1.00485	0.998234	0.998517	1.0049	1.01047	1.01271	1.01923	1.02115	1.02818	1.01349	1.00221	0.98901	0.987034	0.981398	0.967668	0.942711	0.923617	0.911167	0.88805	0.871383	0.861291	0.855822	0.849398	0.847336	0.837649	0.830966	0.827611	0.825459	0.825523	0.831091	0.82947	0.834576	0.838635	0.844685	0.84405
col_cm	1.02773	1.03005	1.02636	1.02451	1.02988	1.02942	1.03123	1.03225	1.03294	1.03181	1.03521	1.03405	1.04931	1.05426	1.0615	1.06886	1.07503	1.06727	1.06894	1.06258	1.04684	1.03488	1.00965	0.988568	0.973069	0.962762	0.945348	0.929027	0.922265	0.917398	0.916145	0.905379	0.900696	0.895769	0.887518	0.876052	0.861683	0.858033	0.854978	0.847183	0.838167
col_cm	1.00987	1.00642	1.00816	1.00589	1.00766	0.997992	1.00027	0.998864	1.0039	1.00518	1.00799	1.01116	1.0189	1.02696	1.02721	1.03382	1.04146	1.04609	1.04882	1.05389	1.04613	1.04381	1.03779	1.02408	1.00476	0.991247	0.982016	0.964905	0.9564	0.949818	0.935786	0.923974	0.915038	0.909094	0.904136	0.901227	0.898967	0.883299	0.874185	0.863967	0.856003
col_cm	0.994202	0.999071	0.993719	0.986466	0.976449	0.985563	0.983975	0.98809	0.990114	0.989145	0.996634	0.996284	0.999861	1.00967	1.0208	1.02664	1.03105	1.04182	1.04137	1.02915	1.02245	1.01149	0.995843	0.9835	0.96738	0.949611	0.939689	0.924328	0.916633	0.90924	0.897895	0.891803	0.884211	0.878535	0.874214	0.87215	0.861379	0.85888	0.851985	0.848949	0.849078
col_cm	0.994251	0.991746	0.988319	0.986572	0.979573	0.973546	0.964476	0.962417	0.959906	0.960211	0.964475	0.971262	0.977878	0.977502	0.988397	0.989028	0.992019	1.00073	1.00819	1.00523	1.00142	0.989254	0.981296	0.972085	0.959703	0.950907	0.945311	0.938393	0.927898	0.919596	0.907342	0.891389	0.892889	0.887073	0.883802	0.874227	0.87144	0.870092	0.861808	0.849715	0.844569
col_cm	0.995683	0.994341	0.993867	0.99109	0.985778	0.982293	0.981062	0.979206	0.979705	0.986092	0.987795	0.994481	0.99276	0.995657	1.00844	1.01546	1.026	1.03948	1.04327	1.03778	1.04565	1.04647	1.03815	1.02758	1.00877	0.995141	0.971044	0.954995	0.943535	0.941253	0.928935	0.904179	0.905647	0.895351	0.882301	0.866431	0.86923	0.860662	0.843662	0.838807	0.843138
col_cm	0.967303	0.968835	0.964001	0.954488	0.952295	0.948328	0.947315	0.952767	0.956884	0.971346	0.971098	0.972824	0.977953	0.978356	0.981008	0.982382	1.00011	1.01897	1.01818	1.02391	1.02577	1.02901	1.02099	1.01516	0.997534	0.988298	0.978553	0.968925	0.952826	0.935416	0.924935	0.913464	0.903002	0.895963	0.889963	0.88361	0.877073	0.868319	0.862757	0.860228	0.850489
col_cm	1.00399	1.00467	1.00581	1.00673	1.0022	0.990642	0.998973	1.00051	0.996201	0.998259	1.01157	1.01543	1.0244	1.02534	1.03158	1.0333	1.03717	1.03606	1.03368	1.02998	1.02194	1.01437	1.00251	0.993106	0.97788	0.964302	0.959093	0.943062	0.93414	0.9262	0.913422	0.910668	0.89514	0.889118	0.880779	0.874319	0.87392	0.869561	0.863815	0.858272	0.852754
aha_cm	0.996991	0.996313	1.00339	1.0045	1.01079	1.00778	1.01516	1.02336	1.02375	1.03351	1.03972	1.03893	1.04098	1.04755	1.05761	1.05678	1.06025	1.0632	1.05058	1.0369	1.03993	1.02734	1.00805	0.995231	0.979365	0.966643	0.959163	0.948278	0.937504	0.930849	0.921873	0.915243	0.904864	0.902142	0.897085	0.88821	0.882496	0.876893	0.868151	0.859314	0.848078
aha_cm	0.967214	0.969546	0.97459	0.972964	0.967824	0.967095	0.968685	0.96746	0.963667	0.968809	0.969829	0.973373	0.984428	0.996441	1.01083	1.01256	1.02039	1.03696	1.04733	1.06271	1.07216	1.06882	1.05031	1.02444	1.00142	0.983812	0.959417	0.937928	0.92353	0.908517	0.900688	0.890836	0.883321	0.875879	0.874941	0.865668	0.859976	0.857559	0.850067	0.844845	0.837
aha_cm	0.973169	0.972841	0.975697	0.978369	0.977632	0.968589	0.96494	0.964124	0.966801	0.969781	0.969857	0.967846	0.968701	0.972042	0.97964	0.987514	1.00064	1.00119	1.00809	1.02143	1.0214	1.02453	1.01263	1.00261	0.986073	0.965897	0.948534	0.932717	0.920233	0.906447	0.902082	0.895531	0.886906	0.877668	0.874613	0.86944	0.861788	0.859907	0.85357	0.85309	0.846476
aha_cm	0.993141	0.999958	0.998572	0.998617	0.995737	0.994462	0.996213	0.999739	1.00359	1.00163	1.00023	1.00915	1.01841	1.02012	1.02935	1.03934	1.04439	1.04914	1.04811	1.04072	1.03318	1.02006	1.00695	0.987223	0.970706	0.961471	0.953067	0.945973	0.943413	0.933992	0.925597	0.917155	0.909705	0.898212	0.891543	0.884761	0.875737	0.86774	0.865145	0.858504	0.852388
aha_cm	0.982726	0.986992	0.99648	0.992366	0.994279	0.99411	0.99413	0.993216	0.994586	0.989324	0.992328	0.997018	0.995695	1.00451	1.01056	1.01183	1.0257	1.03665	1.04237	1.04657	1.0429	1.02976	1.01675	0.995534	0.974928	0.967471	0.954971	0.939836	0.933767	0.928581	0.917588	0.907971	0.902925	0.897396	0.889163	0.885596	0.878557	0.871552	0.855502	0.848271	0.83702
aha_cm	0.986419	0.993419	1.00224	0.997132	0.999828	1.00836	1.01165	1.00901	1.01002	1.01266	1.01604	1.01642	1.02402	1.03209	1.042	1.04725	1.0528	1.05415	1.06374	1.06386	1.0613	1.05081	1.04033	1.02111	1.00261	0.98871	0.971234	0.956397	0.944934	0.933916	0.919719	0.909079	0.900523	0.895944	0.888903	0.878028	0.870493	0.864266	0.86007	0.848761	0.845039
aha_cm	1.00944	1.01334	1.01945	1.02153	1.02611	1.03257	1.04183	1.04564	1.05103	1.05847	1.06254	1.06716	1.07506	1.07824	1.08613	1.08602	1.08975	1.08953	1.08899	1.07886	1.06988	1.0379	1.02231	1.01867	1.00544	0.988095	0.964025	0.950435	0.937165	0.932436	0.924177	0.921547	0.914317	0.907921	0.90113	0.897021	0.886953	0.883749	0.864257	0.849331	0.845946
aha_cm	1.00189	1.0028	1.0112	1.01536	1.02436	1.03067	1.04028	1.05056	1.0615	1.06711	1.06664	1.07432	1.07884	1.0886	1.0906	1.09288	1.09838	1.09902	1.09561	1.0782	1.06219	1.04226	0.993729	0.972107	0.953928	0.937188	0.929553	0.918652	0.911795	0.905179	0.899563	0.890954	0.884182	0.873598	0.867971	0.862908	0.853262	0.846204	0.843352	0.83331	0.82691
aha_cm	0.98222	0.991465	0.999109	1.0061	1.01234	1.01294	1.01375	1.01749	1.01591	1.01839	1.02021	1.02206	1.02872	1.02925	1.0217	1.0117	0.999268	0.987477	0.974518	0.962484	0.946374	0.932165	0.922307	0.904978	0.898061	0.88825	0.879423	0.875296	0.86803	0.859403	0.852294	0.847515	0.843435	0.837021	0.834093	0.831006	0.830228	0.830447	0.836106	0.838773	0.841183
aha_cm	0.979883	0.979052	0.981416	0.972242	0.976981	0.978344	0.974514	0.989059	0.987567	0.989635	0.990207	0.995991	1.0033	1.00351	1.00793	1.00584	0.998887	1.00611	1.00749	1.00186	0.991575	0.984158	0.977095	0.968803	0.955139	0.941499	0.931128	0.927793	0.924884	0.920965	0.909948	0.904038	0.90098	0.893021	0.882644	0.881439	0.872363	0.86916	0.856995	0.859701	0.851393
aha_cm	1.01898	1.02429	1.02533	1.02198	1.02142	1.0226	1.01722	1.0123	1.01787	1.01655	1.01276	1.01733	1.0174	1.01751	1.01695	1.00993	0.998539	0.997858	0.997655	0.996631	0.995233	0.994478	0.991131	0.992166	0.984036	0.980664	0.976901	0.968121	0.956269	0.945275	0.938617	0.935471	0.929806	0.918745	0.914079	0.908239	0.898741	0.892231	0.883726	0.874459	0.872325
aha_cm	0.964121	0.963174	0.960313	0.954759	0.946001	0.945875	0.945422	0.94964	0.956872	0.961404	0.952286	0.962273	0.962979	0.968831	0.983648	0.992326	0.991927	0.99123	0.982581	0.971556	0.967077	0.960105	0.95406	0.947516	0.942965	0.932867	0.924833	0.921905	0.912172	0.897518	0.889528	0.882891	0.877648	0.870644	0.864586	0.859746	0.850388	0.844654	0.841978	0.843076	0.837634
aha_cm	0.941723	0.937757	0.933474	0.925432	0.917919	0.914715	0.909166	0.908965	0.906565	0.907918	0.906955	0.904732	0.903409	0.902967	0.908645	0.916084	0.919889	0.929458	0.93482	0.951938	0.964741	0.968832	0.969267	0.954356	0.9368	0.926445	0.922729	0.916814	0.905862	0.889045	0.875736	0.864207	0.855354	0.846413	0.84029	0.836601	0.835753	0.828099	0.825449	0.817126	0.816176
aha_cm	0.974837	0.975256	0.969937	0.954383	0.955609	0.949229	0.957725	0.959286	0.963412	0.96408	0.968552	0.974198	0.980869	0.989106	0.999569	1.00662	1.01204	1.02065	1.01556	1.01571	1.0109	0.995867	0.979643	0.973508	0.954435	0.943556	0.938655	0.933746	0.920319	0.906982	0.89683	0.892406	0.88722	0.879385	0.877046	0.866389	0.86402	0.853855	0.851123	0.846149	0.838697
aha_cm	1.00092	0.998002	0.998988	0.995465	0.999327	1.00603	1.01002	1.01635	1.0151	1.02141	1.02438	1.03238	1.03716	1.03883	1.04137	1.04052	1.03154	1.02231	1.01531	1.00792	0.99216	0.97862	0.974741	0.964207	0.959972	0.945512	0.936455	0.930038	0.928769	0.918134	0.903344	0.893422	0.883298	0.875551	0.867518	0.860896	0.86032	0.862253	0.85773	0.857889	0.859494
aha_cm	1.00197	1.00006	1.00324	1.00104	0.994464	0.986833	0.991222	0.991859	0.99671	1.00184	1.01661	1.0185	1.01558	1.02206	1.02007	1.0156	1.01965	1.02226	1.03168	1.02778	1.02405	1.01455	1.00713	1.00074	0.990868	0.985473	0.96984	0.9609	0.955181	0.953641	0.951151	0.942739	0.933339	0.934222	0.924074	0.915751	0.904829	0.899921	0.892075	0.883799	0.880029
aha_cm	0.954519	0.951146	0.948366	0.938295	0.934683	0.928455	0.934482	0.931842	0.938086	0.942039	0.94189	0.950238	0.956208	0.954968	0.956639	0.966673	0.976542	0.979176	0.985274	0.989103	0.987781	0.969421	0.971533	0.96987	0.968778	0.966375	0.957345	0.949601	0.930721	0.917058	0.903498	0.893327	0.884735	0.877968	0.870039	0.861315	0.848899	0.843956	0.839775	0.836839	0.828082
aha_cm	0.916089	0.90557	0.899727	0.891813	0.888961	0.885092	0.878994	0.879866	0.881064	0.884688	0.886476	0.890414	0.892435	0.898283	0.902579	0.907433	0.916342	0.929384	0.937323	0.931123	0.932958	0.923863	0.917146	0.913072	0.899854	0.894153	0.87972	0.876277	0.867608	0.86476	0.865166	0.852603	0.841525	0.835969	0.834499	0.832065	0.828351	0.822302	0.819804	0.809885	0.80786
aha_cm	0.958586	0.953655	0.947887	0.945612	0.936615	0.934758	0.923596	0.923788	0.926218	0.923449	0.932101	0.92823	0.924691	0.927385	0.931134	0.934825	0.939818	0.94381	0.948403	0.956398	0.961013	0.96652	0.969934	0.970106	0.968726	0.961299	0.958591	0.957446	0.944333	0.933675	0.92552	0.910522	0.903899	0.891419	0.876723	0.876905	0.869831	0.865964	0.866996	0.859327	0.856427
aha_cm	0.995364	0.997974	0.995869	0.998156	1.00531	0.998941	0.996741	0.989748	0.988089	0.990803	0.995215	0.998575	0.99944	0.998921	1.00191	1.00642	1.0093	1.01645	1.01787	1.01931	1.02215	1.02561	1.02672	1.02219	1.01568	1.00618	0.994584	0.985714	0.973033	0.957719	0.948698	0.931662	0.925371	0.916602	0.905482	0.902444	0.901762	0.893955	0.88329	0.882756	0.871214
aha_cm	0.936385	0.937303	0.919673	0.914454	0.913024	0.898758	0.886517	0.881076	0.878696	0.876334	0.893233	0.895182	0.898724	0.90454	0.911713	0.916297	0.926678	0.928818	0.938142	0.939462	0.94677	0.959326	0.964638	0.97374	0.972254	0.974201	0.972373	0.968044	0.962923	0.951939	0.944967	0.928634	0.91898	0.910976	0.899366	0.89243	0.883223	0.869151	0.860552	0.851255	0.846852
aha_cm	0.931761	0.930649	0.921731	0.914034	0.906898	0.903354	0.895635	0.88725	0.883404	0.877342	0.879226	0.880731	0.881375	0.879824	0.882629	0.889364	0.891715	0.893312	0.902748	0.907172	0.90914	0.911664	0.908964	0.910289	0.918874	0.919006	0.918921	0.917886	0.913457	0.907848	0.898758	0.879928	0.877484	0.863509	0.855571	0.848641	0.839824	0.831798	0.824365	0.81963	0.82108
aha_cm	0.940481	0.93436	0.922407	0.926585	0.919191	0.9178	0.917714	0.913343	0.911724	0.90877	0.912239	0.909282	0.907532	0.909542	0.911237	0.916573	0.919223	0.92639	0.932185	0.938479	0.949116	0.949519	0.941346	0.929782	0.917659	0.90804	0.896488	0.884705	0.877169	0.87137	0.857898	0.854898	0.847293	0.84423	0.836864	0.829397	0.827022	0.816745	0.814013	0.806787	0.807022
aha_cm	0.938865	0.939849	0.930516	0.923448	0.922532	0.915901	0.909559	0.912354	0.90905	0.912134	0.912831	0.920187	0.923523	0.926222	0.92751	0.933912	0.942763	0.946239	0.947426	0.955616	0.958268	0.965643	0.961863	0.957996	0.955114	0.942815	0.934927	0.922805	0.912995	0.908775	0.905446	0.897423	0.880415	0.86663	0.858446	0.851515	0.846651	0.841398	0.838432	0.83155	0.822493
aha_cm	0.940933	0.929796	0.92568	0.922106	0.915172	0.914548	0.914936	0.914936	0.914367	0.916425	0.922872	0.921073	0.929008	0.931861	0.936463	0.937287	0.94876	0.954418	0.958823	0.962722	0.958784	0.953941	0.944459	0.929997	0.917428	0.909853	0.896537	0.888538	0.883647	0.877436	0.86755	0.866135	0.860393	0.859487	0.85464	0.85095	0.848688	0.84484	0.844697	0.835249	0.829202
pp2c_cm	1.00739	1.01634	1.02222	1.02835	1.03393	1.035	1.03618	1.03377	1.04038	1.04116	1.04428	1.04282	1.01359	0.996219	0.992731	0.993348	0.98969	0.980727	0.971996	0.961547	0.951031	0.942673	0.935924	0.927935	0.915377	0.904741	0.891445	0.880437	0.866712	0.86282	0.856332	0.854081	0.851655	0.848478	0.845864	0.846797	0.84794	0.844569	0.851386	0.857185	0.862339
pp2c_cm	0.997351	1.00314	1.00924	1.01092	1.01261	1.02267	1.02337	1.02535	1.02733	1.03252	1.0398	1.04599	1.05257	1.05785	1.05728	1.05347	1.04923	1.0474	1.0389	1.03122	1.02981	1.00673	0.98894	0.980037	0.967579	0.959819	0.950116	0.944492	0.940477	0.935188	0.92838	0.916986	0.910122	0.903689	0.89948	0.88774	0.880261	0.867133	0.857248	0.852687	0.844146
pp2c_cm	0.99563	1.00823	1.00877	1.02282	1.03643	1.04281	1.05079	1.05915	1.06308	1.06679	1.07111	1.07669	1.08092	1.08734	1.08575	1.06506	1.06089	1.06547	1.06523	1.05333	1.0331	1.01053	0.995449	0.984489	0.970307	0.954709	0.944263	0.935103	0.92499	0.913648	0.903279	0.895574	0.889665	0.880971	0.875027	0.871649	0.858293	0.847283	0.841839	0.838057	0.827259
pp2c_cm	0.999803	1.00544	1.0142	1.02285	1.02883	1.03811	1.04642	1.05385	1.05784	1.05579	1.06091	1.06821	1.07015	1.0724	1.07982	1.07422	1.07254	1.06105	1.0469	1.03308	1.01755	1.00058	0.985257	0.972206	0.959813	0.945205	0.934794	0.925289	0.918073	0.90756	0.895908	0.885038	0.880135	0.869054	0.856894	0.847913	0.846077	0.84225	0.836016	0.836744	0.837352
pp2c_cm	1.0193	1.02472	1.03403	1.03386	1.0422	1.04811	1.05206	1.05144	1.05406	1.0568	1.06856	1.07466	1.08472	1.08442	1.0878	1.09005	1.09433	1.09611	1.09457	1.08673	1.06071	1.04043	1.01705	1.00004	0.984398	0.965716	0.949452	0.930794	0.919123	0.91091	0.902575	0.893161	0.888612	0.882121	0.873049	0.863213	0.860478	0.861721	0.85682	0.859832	0.865163
pp2c_cm	1.02596	1.02924	1.0304	1.0391	1.0437	1.04473	1.05049	1.06189	1.06861	1.0731	1.07038	1.07758	1.08124	1.07657	1.06262	1.05361	1.04432	1.03519	1.0197	1.0061	0.996222	0.98563	0.971611	0.9546	0.93682	0.924874	0.91191	0.894464	0.887533	0.879546	0.876627	0.874797	0.879586	0.882545	0.887852	0.899523	0.887108	0.89169	0.902065	0.901606	0.909692
pp2c_cm	1.02229	1.0261	1.02832	1.03515	1.03411	1.03888	1.04381	1.05552	1.06745	1.06858	1.07218	1.07717	1.08292	1.08955	1.09333	1.0927	1.08086	1.06483	1.04968	1.0332	1.01905	1.0006	0.986159	0.976318	0.964718	0.948946	0.93755	0.927275	0.914416	0.907252	0.90099	0.895591	0.898309	0.896196	0.888069	0.894422	0.899035	0.897478	0.895936	0.898537	0.897429
pp2c_cm	1.02101	1.02307	1.02187	1.02107	1.01728	1.01711	1.02779	1.03255	1.03526	1.02467	1.02274	1.04567	1.06917	1.0791	1.07806	1.07335	1.06073	1.04488	1.03188	1.02102	1.00526	0.992923	0.976695	0.96489	0.953408	0.941116	0.925673	0.914379	0.901438	0.889304	0.877892	0.871253	0.8587	0.857235	0.856852	0.855048	0.855308	0.855664	0.861289	0.869173	0.870042
pp2c_cm	1.02176	1.02848	1.02901	1.03085	1.03888	1.03871	1.04688	1.05099	1.05659	1.06419	1.06942	1.07539	1.08283	1.08245	1.08419	1.08406	1.07617	1.06329	1.05374	1.03039	1.01841	1.00649	0.999229	0.995792	0.982717	0.978737	0.970793	0.968235	0.954655	0.954239	0.938488	0.924856	0.92275	0.913773	0.909859	0.905283	0.902722	0.898062	0.898204	0.903105	0.906393
pp2c_cm	1.02654	1.03254	1.02404	1.02321	1.03138	1.03021	1.03553	1.03144	1.03833	1.05944	1.06255	1.06736	1.0742	1.07483	1.07583	1.07361	1.06977	1.06346	1.04466	1.03242	1.01892	1.00743	0.995815	0.986619	0.980154	0.967025	0.964689	0.954058	0.943731	0.93464	0.926775	0.920523	0.914476	0.90526	0.897177	0.893038	0.891741	0.880922	0.87455	0.876091	0.874266
pp2c_cm	1.02921	1.02734	1.03617	1.04146	1.03883	1.04225	1.05209	1.05557	1.05631	1.04833	1.04229	1.03618	1.02804	1.01235	1.00316	0.988481	0.973117	0.959418	0.942652	0.928114	0.916107	0.90519	0.899972	0.904356	0.899868	0.905715	0.90689	0.906665	0.911811	0.912982	0.91772	0.917139	0.905609	0.920345	0.923847	0.92334	0.923413	0.928189	0.922125	0.925863	0.916124
pp2c_cm	1.00219	1.00459	1.00254	1.0052	1.00301	1.00593	1.00643	1.00895	1.01284	1.00958	1.01599	1.01849	1.01312	1.00885	1.00722	0.997144	0.986416	0.976332	0.956826	0.942354	0.93914	0.923332	0.914213	0.903954	0.894284	0.8902	0.887873	0.878127	0.87601	0.871899	0.874484	0.875102	0.87534	0.875668	0.880144	0.878783	0.883223	0.8798	0.88446	0.885036	0.88849
pp2c_cm	1.01456	1.01905	1.023	1.02651	1.032	1.02464	1.03039	1.02809	1.03205	1.03253	1.0372	1.03626	1.0381	1.04667	1.05264	1.05418	1.05627	1.05553	1.05307	1.04887	1.0422	1.03413	1.02231	1.00871	0.997689	0.993439	0.983398	0.971009	0.95855	0.943789	0.933132	0.929789	0.916341	0.911246	0.911437	0.911067	0.905072	0.913408	0.921492	0.917912	0.922387
pp2c_cm	1.05213	1.04712	1.04545	1.04412	1.039	1.03589	1.03199	1.0308	1.02854	1.02934	1.02772	1.02948	1.03392	1.02782	1.01877	1.01999	1.02227	1.017	1.005	0.99724	0.991039	0.980523	0.967822	0.96309	0.955193	0.942529	0.933211	0.927097	0.919156	0.909852	0.902512	0.893633	0.88804	0.885955	0.881003	0.87661	0.87258	0.872653	0.870551	0.864725	0.86548
col_iaa	1.04232	1.0478	1.05359	1.06833	1.07584	1.08659	1.09799	1.10922	1.11709	1.12049	1.11969	1.1496	1.16247	1.16353	1.15201	1.14146	1.12846	1.11113	1.09006	1.07008	1.04595	1.02196	0.998989	0.984991	0.96193	0.950188	0.940671	0.93135	0.916975	0.90406	0.899621	0.894106	0.896668	0.893404	0.885491	0.884498	0.881753	0.884977	0.891722	0.893338	0.894138
col_iaa	1.03514	1.04333	1.04822	1.05836	1.07125	1.08477	1.09176	1.10341	1.11279	1.11928	1.12461	1.13498	1.14295	1.15512	1.16203	1.17054	1.17507	1.18096	1.18697	1.17469	1.16689	1.15794	1.14323	1.13251	1.12155	1.10104	1.07587	1.06376	1.04282	1.0309	1.02192	1.01304	1.00946	1.00489	0.999999	0.99667	0.993913	0.986456	0.982301	0.974217	0.976093
col_iaa	1.04454	1.04813	1.06199	1.0725	1.08771	1.10257	1.11836	1.12282	1.12984	1.14284	1.1514	1.16438	1.18647	1.19654	1.20842	1.21836	1.21591	1.2035	1.17873	1.14975	1.12197	1.09948	1.07718	1.05792	1.04634	1.03871	1.02782	1.02072	1.01449	1.00496	0.999493	0.991065	0.985339	0.975177	0.973594	0.96385	0.95758	0.953602	0.94795	0.941575	0.9387
col_iaa	1.0389	1.04944	1.0568	1.05615	1.06749	1.07474	1.08488	1.09506	1.10519	1.1152	1.11707	1.12621	1.13093	1.14671	1.16067	1.16414	1.17607	1.17512	1.1715	1.15751	1.13771	1.1153	1.09336	1.0766	1.06973	1.05715	1.03931	1.0301	1.02465	1.01311	1.00309	0.99828	0.989122	0.985063	0.982439	0.97279	0.965668	0.962256	0.956838	0.952351	0.949278
col_iaa	1.04976	1.05269	1.06479	1.06922	1.08321	1.09187	1.10539	1.11282	1.1198	1.12214	1.12836	1.13236	1.1344	1.1424	1.14328	1.1693	1.17884	1.18839	1.19291	1.19046	1.179	1.16425	1.14749	1.12927	1.11329	1.09453	1.07774	1.06312	1.04776	1.03956	1.029	1.01307	1.00772	0.998796	0.991761	0.98899	0.970236	0.958077	0.948417	0.939601	0.927698
col_iaa	1.04449	1.04741	1.05583	1.06431	1.07436	1.0892	1.08994	1.1013	1.10865	1.12226	1.12843	1.13374	1.1451	1.1531	1.16962	1.17935	1.18768	1.18611	1.18954	1.19439	1.19788	1.20507	1.2066	1.18938	1.16671	1.14904	1.13403	1.11312	1.09666	1.07936	1.06706	1.05902	1.05147	1.04101	1.03512	1.03106	1.02494	1.02205	1.01174	1.00677	0.999595
col_iaa	1.06488	1.06678	1.08028	1.09183	1.09897	1.10284	1.1182	1.12212	1.14768	1.15073	1.16084	1.17432	1.18728	1.20066	1.21786	1.22985	1.23206	1.23599	1.23265	1.22552	1.20654	1.18392	1.1641	1.13947	1.11705	1.10186	1.08882	1.07347	1.05662	1.04771	1.0386	1.0247	1.01654	1.01071	0.995841	0.990606	0.977498	0.972458	0.963059	0.96279	0.956644
col_iaa	1.02368	1.02904	1.03559	1.0451	1.05086	1.06552	1.07315	1.08515	1.09461	1.09742	1.10791	1.11416	1.12104	1.13059	1.14208	1.14549	1.15299	1.14985	1.13512	1.11773	1.10124	1.08785	1.06999	1.05463	1.04453	1.03413	1.01823	1.00706	1.00804	1.00306	0.995776	0.985455	0.983517	0.972072	0.960032	0.948296	0.941957	0.933791	0.929122	0.923519	0.920171
col_iaa	1.04922	1.05779	1.06652	1.07196	1.08335	1.09307	1.12276	1.13376	1.1402	1.14325	1.15314	1.16146	1.17141	1.19172	1.19963	1.21736	1.23727	1.24843	1.24823	1.24277	1.22981	1.20837	1.18114	1.14892	1.12571	1.1033	1.08387	1.06361	1.05217	1.03631	1.01639	1.00314	0.987817	0.974227	0.972534	0.95753	0.95065	0.944192	0.934907	0.929809	0.930575
col_iaa	1.02147	1.02571	1.03057	1.03837	1.03671	1.05103	1.06569	1.07427	1.07704	1.0912	1.10008	1.10946	1.12561	1.14138	1.15533	1.16742	1.17279	1.17398	1.17783	1.17873	1.17469	1.15642	1.13847	1.12385	1.10338	1.08608	1.07196	1.0591	1.04456	1.03209	1.01937	1.01157	1.00091	0.992567	0.986978	0.976189	0.96644	0.957621	0.947731	0.940487	0.937282
col_iaa	1.05726	1.05341	1.05542	1.05294	1.062	1.07336	1.07562	1.07111	1.08915	1.10465	1.13281	1.14472	1.16074	1.17521	1.1881	1.19254	1.20779	1.21045	1.20132	1.18573	1.16218	1.13029	1.10586	1.07921	1.05684	1.0371	1.01669	1.00432	0.986589	0.972808	0.969604	0.959003	0.951164	0.935281	0.933984	0.925854	0.925652	0.923722	0.926338	0.932663	0.936647
col_iaa	1.06734	1.06491	1.06254	1.06478	1.06801	1.07524	1.07447	1.07909	1.09467	1.08411	1.08686	1.10153	1.0999	1.11487	1.14252	1.17617	1.19549	1.21173	1.22824	1.23398	1.22905	1.20972	1.20454	1.18042	1.1542	1.13043	1.10585	1.08691	1.06879	1.05507	1.03819	1.02811	1.01544	1.00192	0.99053	0.98552	0.97783	0.968854	0.958826	0.951491	0.943554
col_iaa	1.04727	1.04582	1.04038	1.03985	1.03175	1.03431	1.03462	1.04271	1.04874	1.05657	1.0771	1.09378	1.10923	1.12553	1.1477	1.1627	1.16764	1.16351	1.16947	1.21324	1.21616	1.2079	1.1906	1.17724	1.15217	1.13265	1.11345	1.0871	1.08022	1.05912	1.04111	1.03134	1.01539	1.00526	0.990124	0.982209	0.966081	0.959897	0.953208	0.943	0.942463
col_iaa	1.05508	1.05436	1.05319	1.05741	1.07139	1.06896	1.07259	1.06705	1.07366	1.11153	1.14673	1.16362	1.17509	1.18624	1.19653	1.20289	1.20784	1.20035	1.19349	1.18396	1.16598	1.14676	1.12429	1.10805	1.09304	1.07206	1.05436	1.04145	1.0292	1.01793	0.998761	0.997376	0.991108	0.977044	0.968702	0.960781	0.953632	0.94588	0.934654	0.924511	0.931033
col_iaa	1.07699	1.08419	1.08974	1.08935	1.09635	1.09968	1.10444	1.11558	1.12898	1.13497	1.1492	1.16011	1.1705	1.18736	1.20781	1.21898	1.2237	1.23087	1.21637	1.20535	1.18386	1.16391	1.15424	1.11596	1.10514	1.09155	1.07839	1.06704	1.05496	1.04321	1.0249	1.01899	1.00537	0.997984	0.991256	0.980185	0.962009	0.960262	0.955161	0.951827	0.949579
col_iaa	1.03149	1.03042	1.03206	1.03664	1.03365	1.03909	1.05118	1.05839	1.07866	1.08986	1.09832	1.09677	1.10519	1.14719	1.1656	1.17966	1.19846	1.19724	1.18928	1.17603	1.16032	1.13982	1.12501	1.10624	1.08515	1.06272	1.04525	1.02741	1.01577	1.00857	0.995338	0.986789	0.982631	0.967572	0.959098	0.949887	0.949501	0.945197	0.936594	0.940571	0.938584
col_iaa	1.05578	1.05746	1.06191	1.06535	1.06971	1.07085	1.07837	1.0882	1.09524	1.10242	1.11742	1.12591	1.14018	1.15397	1.1608	1.17269	1.19454	1.20651	1.21714	1.22759	1.22929	1.22053	1.21707	1.21491	1.1971	1.1778	1.15204	1.1255	1.10207	1.09249	1.0779	1.06151	1.04765	1.0323	1.01787	1.00898	1.00119	0.996129	0.986953	0.97367	0.961233
col_iaa	1.04419	1.04585	1.04262	1.04496	1.05648	1.05642	1.06418	1.06966	1.08108	1.09627	1.10473	1.11655	1.13001	1.14024	1.15269	1.16029	1.16474	1.15228	1.14235	1.12874	1.11062	1.08528	1.06461	1.04147	1.02818	1.00854	0.998467	0.987642	0.974561	0.968508	0.956791	0.94593	0.9434	0.939287	0.941165	0.935573	0.937283	0.937086	0.932797	0.940419	0.935759
col_iaa	1.06367	1.06349	1.06854	1.06383	1.07258	1.07973	1.07581	1.08622	1.10384	1.12271	1.14398	1.1627	1.17125	1.19475	1.20779	1.22117	1.22492	1.22128	1.22052	1.20399	1.18293	1.15997	1.13217	1.11111	1.09352	1.08272	1.0651	1.05106	1.04007	1.0271	1.01733	1.01163	1.00406	0.994	0.987088	0.970817	0.967941	0.963785	0.960292	0.957913	0.949305
col_iaa	1.05265	1.06399	1.06185	1.06407	1.0659	1.07453	1.08192	1.08827	1.09038	1.10042	1.10226	1.09286	1.12325	1.13186	1.14483	1.17884	1.20693	1.2142	1.2205	1.21757	1.21215	1.19438	1.17069	1.14961	1.13302	1.11618	1.09204	1.08316	1.0647	1.06113	1.05519	1.04307	1.0343	1.02858	1.01702	1.00486	0.997453	0.987042	0.981511	0.978004	0.964065
col_iaa	0.996084	0.992944	0.992229	0.996006	0.992874	0.984712	0.994963	1.00016	1.00343	1.01283	1.03137	1.04078	1.04804	1.06669	1.08425	1.09894	1.11133	1.12718	1.13921	1.14278	1.13085	1.11299	1.09258	1.06472	1.04371	1.01708	1.00465	0.985019	0.975178	0.960907	0.950678	0.94045	0.930019	0.925062	0.921783	0.915197	0.915399	0.906783	0.900536	0.89378	0.890423
col_iaa	0.994705	0.992731	0.990344	0.987345	0.990875	0.990551	0.992907	1.00077	1.00115	1.00995	1.01331	1.02578	1.03428	1.04451	1.05492	1.07238	1.08267	1.09374	1.10386	1.10459	1.11023	1.10749	1.10565	1.08622	1.07089	1.05356	1.03843	1.02381	1.00713	0.993301	0.991588	0.974759	0.962928	0.95371	0.950471	0.941886	0.930215	0.919296	0.913374	0.904225	0.898752
col_iaa	1.01031	1.01035	1.01207	1.0158	1.02159	1.02649	1.03422	1.04616	1.0529	1.04784	1.05014	1.05552	1.05912	1.07226	1.09707	1.10951	1.11188	1.13367	1.13861	1.13835	1.14523	1.12815	1.11528	1.09454	1.07999	1.0639	1.04789	1.03786	1.02321	1.0053	0.993185	0.976482	0.966645	0.959833	0.953361	0.939902	0.926095	0.923434	0.911973	0.90607	0.903223
col_iaa	1.00816	1.01375	1.01556	1.01428	1.02044	1.02091	1.02885	1.03579	1.03488	1.04626	1.04711	1.05964	1.07059	1.08023	1.11713	1.1374	1.15119	1.16393	1.15752	1.13708	1.12354	1.11393	1.091	1.07468	1.05339	1.02456	1.0055	0.981694	0.967979	0.942713	0.932567	0.925592	0.911999	0.908938	0.897559	0.895	0.885786	0.882977	0.876266	0.873165	0.865659
col_iaa	0.994064	0.997566	0.997813	0.998558	1.00115	1.00188	1.00379	1.00726	1.0208	1.02916	1.02953	1.03652	1.04498	1.06269	1.08107	1.09255	1.10451	1.12029	1.13362	1.14473	1.14891	1.15628	1.15037	1.13612	1.11436	1.10593	1.08685	1.06785	1.05272	1.02883	1.01878	1.00729	0.99903	0.989161	0.979554	0.970092	0.958152	0.955249	0.945343	0.943439	0.938368
col_iaa	1.00797	1.0048	1.00498	1.00458	1.00399	1.00476	1.01665	1.01584	1.01722	1.02533	1.03659	1.04997	1.05257	1.05504	1.06332	1.07903	1.09089	1.104	1.12264	1.12309	1.11526	1.11284	1.10459	1.08304	1.06843	1.04264	1.02056	1.00784	0.987401	0.977198	0.969073	0.955143	0.949307	0.937225	0.929082	0.927515	0.922509	0.913042	0.906649	0.899087	0.89894
col_iaa	1.04548	1.05237	1.04894	1.04024	1.04806	1.05439	1.0607	1.06518	1.07631	1.09223	1.1028	1.10994	1.12593	1.14124	1.1616	1.18347	1.19508	1.1974	1.20244	1.20385	1.20127	1.18417	1.16462	1.13723	1.10752	1.07504	1.05454	1.03435	1.02182	1.00199	0.992971	0.983179	0.972339	0.953245	0.942804	0.93753	0.930845	0.922469	0.914316	0.907871	0.897456
col_iaa	0.997528	0.994132	0.994722	0.991511	0.994192	0.993224	0.996687	0.999527	1.00375	1.0063	1.013	1.02031	1.02786	1.04094	1.05541	1.06361	1.08075	1.09943	1.10794	1.11839	1.12261	1.12041	1.10776	1.09732	1.08028	1.06403	1.04101	1.03533	1.01555	0.996178	0.984362	0.978676	0.972403	0.954979	0.944589	0.939151	0.927911	0.921163	0.915424	0.910295	0.901339
col_iaa	1.00794	1.00779	1.01079	1.00936	1.02053	1.02487	1.0364	1.0455	1.05138	1.05399	1.06142	1.06513	1.07229	1.08484	1.08723	1.09712	1.09828	1.09088	1.07945	1.06908	1.04855	1.03426	1.01495	0.993981	0.97898	0.955068	0.935624	0.935917	0.926814	0.917177	0.905776	0.898069	0.885972	0.879428	0.87472	0.873674	0.868515	0.864838	0.866327	0.865736	0.858909
col_iaa	0.986838	0.983546	0.989325	0.993122	0.993343	1.00011	0.99965	1.00464	1.01091	1.016	1.04168	1.05484	1.06466	1.07178	1.08962	1.09873	1.09941	1.09165	1.08003	1.06755	1.04289	1.02625	0.998226	0.988454	0.970332	0.95697	0.944045	0.927941	0.917478	0.901757	0.886772	0.885323	0.876258	0.869464	0.859133	0.849074	0.842653	0.833184	0.835231	0.83373	0.839505
aha_iaa	1.00113	1.01031	1.01551	1.01993	1.02146	1.0247	1.03724	1.04634	1.05707	1.05698	1.05968	1.06427	1.07172	1.07641	1.08167	1.08857	1.08799	1.09455	1.09964	1.10705	1.1056	1.0951	1.08312	1.06863	1.05346	1.04068	1.02765	1.01247	0.996606	0.982735	0.97562	0.964863	0.953729	0.95212	0.942001	0.933692	0.921062	0.913344	0.910393	0.905633	0.899525
aha_iaa	1.02404	1.02737	1.03042	1.03736	1.04641	1.04851	1.06408	1.06948	1.07358	1.07948	1.08486	1.09219	1.09751	1.11117	1.11732	1.12844	1.13945	1.15554	1.16819	1.17152	1.17412	1.16936	1.16493	1.15224	1.13622	1.11917	1.09607	1.08288	1.07185	1.05697	1.04195	1.02641	1.01857	1.00498	0.99084	0.974187	0.963931	0.957583	0.950196	0.941691	0.928557
aha_iaa	1.05224	1.06051	1.06965	1.08049	1.09337	1.09953	1.0889	1.08996	1.08767	1.12516	1.1351	1.13287	1.13936	1.14923	1.15593	1.174	1.1853	1.19908	1.21108	1.21825	1.21056	1.19825	1.17378	1.15077	1.12338	1.09494	1.07752	1.06331	1.04549	1.03161	1.0208	1.01137	1.00313	0.993703	0.98572	0.978339	0.970867	0.960972	0.951498	0.94213	0.940696
aha_iaa	1.00643	1.00456	0.997099	1.00802	1.01214	1.01594	1.02107	1.03375	1.03664	1.04633	1.05129	1.06254	1.06502	1.06757	1.08082	1.08673	1.08623	1.10234	1.11701	1.11931	1.11706	1.11715	1.1067	1.09123	1.07963	1.06471	1.05042	1.03862	1.02256	1.00905	1.00763	1.0046	1.00055	0.993014	0.985675	0.981179	0.978135	0.972002	0.967537	0.959983	0.954644
aha_iaa	1.00465	1.00715	1.01346	1.01343	1.02047	1.02814	1.03333	1.04219	1.04537	1.04758	1.04568	1.04741	1.05101	1.05818	1.06275	1.07145	1.07866	1.08398	1.09404	1.09591	1.09619	1.09808	1.09816	1.09133	1.082	1.06513	1.04583	1.03335	1.01215	0.999131	0.990931	0.983923	0.97068	0.96677	0.957705	0.954332	0.946557	0.941238	0.937893	0.935407	0.93433
aha_iaa	1.02012	1.02548	1.03362	1.0374	1.04572	1.05459	1.06209	1.06362	1.06274	1.05803	1.06917	1.07788	1.09065	1.10609	1.11855	1.12943	1.14435	1.16234	1.17625	1.19154	1.19615	1.18305	1.16292	1.13281	1.10198	1.07584	1.05522	1.04003	1.02526	1.01994	1.01017	1.00667	1.00051	0.990239	0.987949	0.972009	0.968085	0.960546	0.959572	0.953931	0.95406
aha_iaa	1.03206	1.03594	1.03525	1.04625	1.05629	1.06277	1.07376	1.08108	1.08549	1.09651	1.10627	1.11408	1.12137	1.1352	1.14319	1.15778	1.1709	1.18149	1.19277	1.18526	1.1635	1.1433	1.12145	1.11132	1.09214	1.08916	1.07885	1.06907	1.05685	1.04724	1.0415	1.03381	1.02302	1.01601	1.01143	0.999447	0.991557	0.985918	0.981804	0.977384	0.971288
aha_iaa	1.01431	1.02317	1.02677	1.03027	1.03073	1.03743	1.03932	1.04681	1.04629	1.05405	1.05446	1.05394	1.0616	1.06638	1.06485	1.07635	1.09906	1.10032	1.09555	1.08558	1.07111	1.06592	1.0547	1.03784	1.02532	1.01804	1.00517	0.998305	0.986857	0.976328	0.967125	0.956761	0.948802	0.946986	0.945407	0.936527	0.929747	0.925971	0.919166	0.915701	0.913844
aha_iaa	1.03203	1.04064	1.04842	1.06331	1.07748	1.09014	1.09877	1.10822	1.11459	1.11025	1.10975	1.11335	1.12058	1.13364	1.13863	1.1513	1.16393	1.1698	1.18771	1.20912	1.21803	1.2175	1.21076	1.19749	1.1754	1.14434	1.11657	1.09196	1.07227	1.05723	1.04208	1.02765	1.01936	1.01045	1.00718	1.00006	0.986157	0.977976	0.968219	0.961408	0.956346
aha_iaa	1.04933	1.05845	1.07327	1.07706	1.0844	1.09603	1.10535	1.10624	1.10975	1.10922	1.1105	1.11221	1.11501	1.11494	1.11248	1.11268	1.10882	1.0973	1.08484	1.07208	1.0531	1.03221	1.02156	1.00625	0.99214	0.981169	0.970528	0.959847	0.948136	0.939251	0.927967	0.920501	0.912798	0.903821	0.891617	0.881914	0.881861	0.879773	0.880272	0.880404	0.881612
aha_iaa	1.00001	0.993256	0.986004	0.979105	0.970648	0.965993	0.968634	0.973335	0.986562	1.00414	1.01316	1.02733	1.04071	1.05667	1.07511	1.0929	1.1089	1.11826	1.12976	1.13287	1.13897	1.13949	1.14212	1.13807	1.1297	1.11944	1.10792	1.09376	1.08468	1.06763	1.05438	1.04325	1.02549	1.02121	1.01055	1.00203	0.998131	0.984928	0.976997	0.974898	0.96578
aha_iaa	1.02916	1.04176	1.0383	1.03499	1.02858	1.03401	1.03683	1.04462	1.04826	1.0605	1.06403	1.08449	1.10139	1.10955	1.12863	1.1479	1.17008	1.19395	1.20919	1.21599	1.21017	1.20034	1.18104	1.16593	1.14471	1.15101	1.14485	1.13528	1.14131	1.11665	1.10465	1.08975	1.07756	1.0607	1.04764	1.04029	1.03131	1.0218	1.01453	0.999889	0.98877
aha_iaa	1.01957	1.01157	1.01549	1.0102	1.00983	1.00045	1.00193	1.00555	1.00314	1.02256	1.03763	1.04173	1.05388	1.07243	1.08474	1.08927	1.1007	1.11054	1.12791	1.13304	1.144	1.1503	1.14757	1.14999	1.14696	1.14593	1.13661	1.13258	1.12126	1.10545	1.08569	1.07717	1.06666	1.05278	1.04153	1.02899	1.0169	1.01136	0.997711	0.987673	0.985806
aha_iaa	1.03304	1.0374	1.03124	1.0381	1.03192	1.03621	1.03999	1.04997	1.05449	1.06478	1.07005	1.08075	1.09137	1.10466	1.11051	1.12214	1.12614	1.14318	1.15415	1.16513	1.15788	1.15348	1.14786	1.13881	1.12606	1.11527	1.10634	1.09583	1.08035	1.06717	1.06239	1.04664	1.04075	1.03131	1.02225	1.01312	0.999504	0.989331	0.981723	0.976897	0.97079
aha_iaa	0.981909	0.984446	0.985144	0.984481	0.97861	0.973359	0.974722	0.975625	0.983178	0.985195	0.988724	1.00136	1.00838	1.02071	1.02241	1.02824	1.03424	1.04276	1.05956	1.07566	1.08395	1.10198	1.11129	1.11859	1.11762	1.11568	1.11385	1.09742	1.08423	1.06304	1.05479	1.03383	1.02401	1.00455	0.999265	0.9875	0.979702	0.966734	0.955653	0.948389	0.942267
aha_iaa	1.00387	0.998731	0.999985	0.997577	0.995677	0.996453	0.995712	0.990535	0.997844	1.01473	1.03193	1.04135	1.05231	1.05944	1.07085	1.08805	1.1098	1.12032	1.11254	1.11414	1.10745	1.09501	1.07775	1.06796	1.04327	1.03695	1.0198	1.00222	0.983395	0.970801	0.955533	0.939633	0.925797	0.916383	0.911846	0.902035	0.895154	0.878911	0.875898	0.870773	0.866524
aha_iaa	0.990552	0.987624	0.984085	0.979165	0.976028	0.976518	0.983661	0.985096	0.991428	1.00198	1.00527	1.01487	1.01884	1.02704	1.04225	1.05009	1.05963	1.07331	1.08113	1.08483	1.08143	1.07564	1.07024	1.06108	1.0584	1.04786	1.03262	1.02287	1.01481	0.988849	0.979365	0.958488	0.94424	0.931903	0.920326	0.912736	0.897536	0.892761	0.889914	0.882166	0.877057
aha_iaa	0.975094	0.977014	0.970696	0.959361	0.95115	0.949554	0.947539	0.953138	0.9613	0.968558	0.968654	0.978003	0.98792	0.998103	1.00718	1.01717	1.0242	1.04166	1.05526	1.06516	1.07659	1.08187	1.07791	1.07917	1.07443	1.07349	1.06498	1.04392	1.02735	1.02532	1.01485	1.00492	0.993217	0.988917	0.974625	0.974685	0.963189	0.957236	0.953268	0.945556	0.935562
aha_iaa	0.979098	0.973299	0.969433	0.962258	0.96105	0.957466	0.963289	0.965962	0.973225	0.978964	0.984122	0.991805	0.997856	1.00748	1.01418	1.01913	1.02377	1.02254	1.0286	1.0354	1.04545	1.05297	1.05915	1.07356	1.07809	1.07471	1.06261	1.06044	1.04708	1.03102	1.01358	0.997817	0.990664	0.984312	0.968308	0.961278	0.948232	0.9334	0.931667	0.925594	0.921659
aha_iaa	0.9809	0.986284	0.990305	0.990541	0.99252	0.995716	1.00121	1.00528	1.00618	1.00918	1.01605	1.01357	1.02259	1.03522	1.04739	1.05733	1.06234	1.07331	1.07916	1.08063	1.07403	1.06125	1.04647	1.03277	1.01646	0.997802	0.983361	0.968953	0.955233	0.937094	0.925218	0.91069	0.895509	0.887546	0.878861	0.871338	0.866375	0.852783	0.849534	0.842533	0.837078
aha_iaa	0.954047	0.952516	0.95324	0.954248	0.951084	0.95297	0.959569	0.968188	0.974525	0.986934	0.988788	0.99343	0.99865	1.00678	1.01123	1.01804	1.0284	1.03632	1.0394	1.04713	1.05663	1.06225	1.07104	1.06997	1.06485	1.05912	1.05495	1.04154	1.02273	1.01457	0.994593	0.979894	0.964491	0.950942	0.945528	0.938014	0.919433	0.903873	0.903162	0.898384	0.888917
aha_iaa	0.951331	0.94763	0.940978	0.940121	0.944689	0.944048	0.94637	0.959015	0.967375	0.972706	0.973934	0.982975	0.990409	0.999104	1.00249	1.00854	1.01544	1.02838	1.03932	1.0452	1.04591	1.03714	1.02901	1.02235	1.00683	0.991979	0.973694	0.962372	0.954913	0.944874	0.934252	0.927845	0.918561	0.909918	0.898095	0.887331	0.882314	0.878774	0.872339	0.871004	0.865085
aha_iaa	0.956194	0.954403	0.949873	0.942058	0.937527	0.929709	0.924442	0.923849	0.927571	0.933228	0.939366	0.945143	0.953535	0.957015	0.969351	0.973763	0.982037	0.994396	1.00702	1.0144	1.03251	1.04992	1.05948	1.0693	1.06659	1.06476	1.06285	1.04795	1.03214	1.00809	1.00044	0.99174	0.973519	0.967703	0.952934	0.939269	0.932131	0.922547	0.916566	0.910916	0.899993
aha_iaa	0.920041	0.923187	0.91537	0.907834	0.895278	0.886445	0.881005	0.879634	0.888195	0.889477	0.898927	0.906121	0.915246	0.926914	0.938935	0.947736	0.951793	0.956191	0.959947	0.96525	0.979325	0.993758	1.00836	1.01801	1.01507	1.01848	1.01203	1.00736	0.995464	0.979545	0.969896	0.958373	0.946804	0.936284	0.922581	0.913208	0.904522	0.895549	0.880574	0.877449	0.864765
aha_iaa	0.949631	0.946437	0.935242	0.9271	0.922606	0.912845	0.901016	0.906855	0.90595	0.906749	0.910138	0.919333	0.928068	0.932394	0.944732	0.952457	0.968757	0.98786	1.00426	1.02457	1.03952	1.05133	1.05988	1.06157	1.04497	1.03512	1.02842	1.02504	1.02335	1.02208	1.01809	1.00194	0.992223	0.969726	0.957134	0.943482	0.932857	0.914781	0.898631	0.893833	0.882665
aha_iaa	0.959052	0.954717	0.947731	0.940865	0.933983	0.927148	0.930323	0.930871	0.937675	0.939325	0.943243	0.950963	0.959577	0.966036	0.974059	0.983801	0.993292	1.00902	1.01748	1.03348	1.04033	1.05116	1.06008	1.06371	1.05785	1.04349	1.0243	1.01309	1.00177	0.988231	0.977065	0.965349	0.948036	0.929957	0.920035	0.90931	0.904986	0.889418	0.882527	0.867774	0.853388
aha_iaa	1.00254	1.00265	1.00263	1.00195	1.0002	1.00082	1.00761	1.00914	1.01381	1.01845	1.02236	1.02549	1.03768	1.03647	1.03478	1.04484	1.05867	1.08149	1.08841	1.09641	1.08655	1.07828	1.06649	1.05694	1.04909	1.03532	1.03095	1.00604	0.994516	0.977194	0.965048	0.956481	0.947407	0.930431	0.91963	0.905944	0.892576	0.883748	0.876881	0.868635	0.859142
aha_iaa	0.983417	0.985665	0.994899	0.999672	0.999396	1.00254	1.00398	1.00012	1.00209	1.00958	1.01569	1.02317	1.0328	1.04013	1.05073	1.05874	1.07349	1.09004	1.09556	1.09953	1.10435	1.11182	1.11039	1.09327	1.0832	1.0593	1.0441	1.03029	1.01486	1.00118	0.981981	0.971999	0.961981	0.948615	0.938924	0.931433	0.927132	0.921131	0.914263	0.907078	0.900007
pp2c_iaa	1.02764	1.03817	1.04618	1.05121	1.05924	1.07765	1.08902	1.10028	1.10385	1.11801	1.12691	1.13519	1.142	1.14692	1.14757	1.13922	1.12624	1.10994	1.09033	1.07814	1.06661	1.04675	1.03557	1.02486	1.02137	1.01012	1.00305	1.00035	0.99112	0.983489	0.978766	0.971602	0.967713	0.961078	0.955818	0.950817	0.950905	0.950906	0.953346	0.956025	0.956725
pp2c_iaa	1.0557	1.06411	1.0705	1.08633	1.09735	1.11233	1.11817	1.13013	1.13726	1.1472	1.15877	1.16728	1.18099	1.19133	1.20428	1.21575	1.22226	1.23214	1.23313	1.22796	1.20619	1.18195	1.16077	1.13153	1.11432	1.09405	1.08032	1.06499	1.05125	1.03205	1.02572	1.01445	1.01008	1.0005	0.992379	0.983498	0.975606	0.968076	0.967568	0.958107	0.956899
pp2c_iaa	1.03885	1.04645	1.05782	1.07062	1.08225	1.09347	1.11094	1.11954	1.12672	1.13579	1.14901	1.16274	1.16461	1.16909	1.15924	1.14736	1.12978	1.11316	1.09974	1.08005	1.06466	1.04727	1.03975	1.02984	1.02095	1.00821	1.00042	0.994639	0.987484	0.975016	0.961805	0.956748	0.951863	0.948576	0.950337	0.950333	0.95358	0.95075	0.956329	0.957128	0.960273
pp2c_iaa	1.05913	1.04647	1.05457	1.06323	1.06559	1.10659	1.12524	1.13823	1.14312	1.14866	1.15839	1.16912	1.18121	1.19787	1.21391	1.22605	1.23141	1.22546	1.21343	1.1883	1.15594	1.13031	1.10677	1.08147	1.06309	1.04375	1.02678	1.01541	1.00142	0.992114	0.982772	0.973517	0.96109	0.952441	0.937348	0.931534	0.927526	0.922656	0.921652	0.923691	0.921577
pp2c_iaa	1.04748	1.05316	1.06163	1.0749	1.08674	1.09605	1.11437	1.13209	1.14495	1.15179	1.16626	1.17872	1.19129	1.20424	1.20838	1.20299	1.19417	1.18594	1.16764	1.15735	1.13807	1.11548	1.09451	1.0725	1.06032	1.04347	1.03038	1.02008	1.01159	1.00448	0.994747	0.989685	0.982554	0.981229	0.976135	0.972074	0.970775	0.967111	0.961236	0.96079	0.955971
pp2c_iaa	1.04638	1.05383	1.06475	1.07492	1.08475	1.09307	1.10444	1.11693	1.12465	1.13328	1.14343	1.15246	1.15812	1.15919	1.14921	1.13642	1.12933	1.11494	1.09766	1.07752	1.06018	1.04176	1.02991	1.01706	1.00722	1.00113	0.989311	0.984999	0.978777	0.972996	0.969781	0.968204	0.969257	0.96768	0.967323	0.965921	0.964786	0.968291	0.97038	0.964177	0.970046
pp2c_iaa	1.06372	1.07638	1.08132	1.08665	1.10312	1.108	1.11763	1.13365	1.13981	1.14445	1.15687	1.16013	1.16411	1.17479	1.17623	1.17895	1.17877	1.17733	1.16318	1.14445	1.12129	1.09916	1.08856	1.07694	1.06714	1.06077	1.05521	1.04474	1.04296	1.03419	1.02237	1.01876	1.01708	1.01117	1.00322	1.00156	0.996051	0.996031	0.991622	0.992121	0.994842
pp2c_iaa	1.07409	1.07965	1.09346	1.10868	1.11883	1.13057	1.1344	1.1451	1.15076	1.16164	1.16954	1.18158	1.19721	1.20394	1.20677	1.19785	1.18118	1.16627	1.15123	1.11484	1.07388	1.07403	1.06222	1.0436	1.02117	1.00085	0.988918	0.976739	0.9701	0.962301	0.961032	0.957102	0.958176	0.964236	0.968819	0.978156	0.985779	0.98599	0.98949	0.993157	1.00033
pp2c_iaa	1.03711	1.04222	1.04976	1.0588	1.05433	1.06329	1.07092	1.0818	1.09289	1.10764	1.11972	1.13219	1.14098	1.14906	1.15481	1.1641	1.17789	1.1811	1.17995	1.168	1.15744	1.14325	1.12841	1.11601	1.09671	1.07809	1.06418	1.05066	1.03164	1.01265	1.0036	0.989385	0.972879	0.96499	0.949952	0.940567	0.926262	0.917251	0.914278	0.906506	0.903364
pp2c_iaa	1.0486	1.0482	1.0516	1.05971	1.06287	1.07586	1.08552	1.09825	1.10838	1.12554	1.14175	1.15853	1.1729	1.19028	1.1969	1.20389	1.1939	1.17814	1.15635	1.14017	1.12408	1.10684	1.08673	1.07819	1.06694	1.05061	1.03186	1.01819	0.998903	0.988931	0.979254	0.970509	0.961635	0.95362	0.937176	0.930495	0.924517	0.914735	0.912125	0.914948	0.909686
pp2c_iaa	1.02253	1.03392	1.03807	1.04998	1.05363	1.06202	1.07521	1.08517	1.10038	1.11729	1.13437	1.15605	1.1705	1.17689	1.17243	1.1559	1.15822	1.139	1.13078	1.11271	1.09131	1.06897	1.04755	1.02533	1.00065	0.981383	0.96875	0.958035	0.948741	0.936288	0.937104	0.925615	0.922302	0.924979	0.930701	0.928542	0.92626	0.928838	0.928003	0.930156	0.930699
pp2c_iaa	1.07207	1.07714	1.08938	1.09763	1.10857	1.1147	1.12589	1.13606	1.14471	1.15394	1.16098	1.17004	1.17935	1.1851	1.19501	1.19892	1.20345	1.20103	1.20213	1.1876	1.17294	1.15325	1.13304	1.11632	1.09762	1.08444	1.0715	1.0602	1.04598	1.03475	1.0288	1.01379	1.00284	0.996005	0.983533	0.977395	0.976012	0.969685	0.967279	0.964906	0.957007
pp2c_iaa	1.04003	1.04436	1.05289	1.05919	1.07356	1.08152	1.09379	1.11079	1.12618	1.14226	1.15076	1.16512	1.17252	1.19017	1.20918	1.22049	1.22063	1.21437	1.19375	1.17977	1.15928	1.13854	1.1167	1.09373	1.07712	1.06429	1.0512	1.03211	1.01796	0.998224	0.991051	0.97081	0.965434	0.9601	0.950459	0.945355	0.938222	0.937335	0.935326	0.938148	0.938221
pp2c_iaa	1.03307	1.04163	1.04954	1.05262	1.05904	1.06671	1.0704	1.07388	1.08021	1.09042	1.09966	1.10992	1.11781	1.11902	1.12205	1.12175	1.11309	1.10731	1.09134	1.07165	1.05652	1.04998	1.0388	1.02571	1.01711	1.0098	0.995356	0.989034	0.982485	0.97739	0.965446	0.963691	0.959195	0.957767	0.962933	0.957276	0.95954	0.958861	0.957185	0.962417	0.966289
pp2c_iaa	1.03842	1.0464	1.06029	1.05827	1.06786	1.07994	1.08413	1.09446	1.1026	1.1062	1.11373	1.11132	1.11363	1.10068	1.08805	1.07179	1.06031	1.04414	1.03779	1.02401	1.01665	1.00566	0.991632	0.989184	0.980728	0.975941	0.971139	0.967179	0.958242	0.957134	0.955587	0.950171	0.950516	0.948772	0.939456	0.944334	0.949557	0.953144	0.948908	0.947752	0.948321
pp2c_iaa	1.03072	1.03326	1.03987	1.04482	1.0466	1.05229	1.05766	1.05041	1.06317	1.07488	1.07104	1.08023	1.09869	1.10841	1.11948	1.13256	1.13723	1.13936	1.13835	1.12474	1.10931	1.08096	1.06306	1.06906	1.05982	1.04737	1.03606	1.0188	1.0029	0.992336	0.985662	0.980884	0.973979	0.970545	0.964625	0.957771	0.958905	0.957976	0.947232	0.945933	0.943329
pp2c_iaa	0.992066	0.998499	1.00058	1.01047	1.01714	1.02129	1.02415	1.02435	1.03085	1.03355	1.04234	1.0412	1.04956	1.06306	1.07111	1.0653	1.07527	1.07815	1.07145	1.06207	1.05008	1.03077	1.01647	0.994467	0.984234	0.968709	0.956108	0.948186	0.937373	0.923488	0.91734	0.905297	0.894658	0.884385	0.874384	0.865633	0.865897	0.861689	0.854506	0.851528	0.856675
pp2c_iaa	1.00298	1.00644	1.01432	1.01952	1.02647	1.0346	1.04399	1.04818	1.06066	1.07141	1.07823	1.08872	1.09355	1.09669	1.08609	1.07383	1.06083	1.04176	1.01888	1.0034	0.982927	0.966735	0.952235	0.946687	0.929118	0.919898	0.908023	0.892492	0.884898	0.878256	0.871789	0.870721	0.864401	0.856476	0.866484	0.86696	0.86209	0.859268	0.861644	0.87274	0.869158
pp2c_iaa	0.998604	1.00431	1.01381	1.02092	1.024	1.03388	1.04206	1.05137	1.05903	1.06683	1.07007	1.08363	1.09283	1.09538	1.09854	1.08905	1.07412	1.06743	1.04387	1.02451	1.01114	0.99408	0.979654	0.970934	0.956841	0.949196	0.937302	0.928446	0.922206	0.915776	0.908178	0.909221	0.901183	0.899408	0.903324	0.899328	0.903295	0.905527	0.905337	0.899633	0.905477

## Sheet: S2-2e
distance from root tip (µm)	0	20	40	60	80	100	120	140	160	180	200	220	240	260	280	300	320	340	360	380	400	420	440	460	480	500	520	540	560	580	600	620	640	660	680	700	720	740	760	780	800
col_iaa	0.0423204	0.0463606	0.0513737	0.0659712	0.0731658	0.0833759	0.0925799	0.10128	0.105283	0.105361	0.0997349	0.124624	0.131352	0.127789	0.109964	0.09588	0.0806321	0.0631565	0.0470346	0.0352985	0.0213216	0.00974825	-0.000302002	-0.00148832	-0.0107428	-0.00995292	-0.00882052	-0.0072245	-0.0118677	-0.0159163	-0.0111952	-0.00770298	0.00144375	0.00547214	0.00312981	0.00933445	0.0122394	0.0214249	0.0329799	0.0385111	0.043935
col_iaa	0.0351383	0.0418913	0.046004	0.0560008	0.0685801	0.081555	0.0863547	0.0954657	0.100982	0.104152	0.104654	0.110006	0.111825	0.119386	0.119984	0.124961	0.12724	0.132982	0.143942	0.139908	0.142254	0.145724	0.143944	0.146036	0.148879	0.140904	0.126377	0.12518	0.11398	0.110924	0.111107	0.111227	0.114236	0.116957	0.117638	0.121507	0.124399	0.122904	0.123559	0.119391	0.12589
col_iaa	0.044538	0.0466905	0.0597683	0.0701397	0.0850341	0.0993475	0.11295	0.114881	0.118038	0.127717	0.131444	0.139407	0.15535	0.160799	0.166375	0.172778	0.168087	0.155522	0.135707	0.11497	0.0973354	0.0872659	0.0778913	0.0714447	0.0736691	0.0785673	0.078327	0.0821413	0.0856488	0.0849853	0.0886774	0.0892558	0.0901146	0.0872453	0.091233	0.0886866	0.0880666	0.0900499	0.089208	0.0867486	0.0884967
col_iaa	0.0388976	0.0480036	0.0545751	0.0537864	0.0648117	0.0715177	0.0794684	0.0871156	0.0933907	0.100071	0.0971182	0.101238	0.0998076	0.110972	0.118627	0.118562	0.128239	0.127141	0.128477	0.122724	0.113078	0.103087	0.0940708	0.0901222	0.0970592	0.0970128	0.0898139	0.0915261	0.0958027	0.0931311	0.0922716	0.0964713	0.0938973	0.0971308	0.100078	0.0976271	0.0961543	0.0987044	0.0980961	0.0975244	0.0990742
col_iaa	0.0497557	0.0512508	0.0625739	0.0668598	0.080539	0.0886563	0.099985	0.104879	0.108001	0.107008	0.108404	0.107385	0.103274	0.10666	0.101229	0.123727	0.131017	0.140414	0.149885	0.155675	0.154372	0.152042	0.148201	0.14279	0.140622	0.134392	0.128248	0.124541	0.118914	0.119586	0.118184	0.111258	0.112495	0.110864	0.109399	0.113827	0.100722	0.0945249	0.089675	0.084774	0.0774945
col_iaa	0.0444882	0.0459756	0.0536127	0.0619443	0.0716846	0.0859826	0.084533	0.0933616	0.0968507	0.107133	0.108478	0.108765	0.113978	0.117365	0.127577	0.133769	0.139849	0.138131	0.146516	0.15961	0.173245	0.192861	0.207307	0.202903	0.194036	0.188895	0.184534	0.174548	0.167817	0.159383	0.156241	0.157211	0.156249	0.153074	0.152755	0.155901	0.155423	0.158494	0.152996	0.15194	0.149392
col_iaa	0.0648794	0.0653479	0.078055	0.0894636	0.0962955	0.099621	0.112797	0.114177	0.13588	0.135599	0.140888	0.149346	0.156163	0.164918	0.175817	0.184275	0.184229	0.188014	0.189624	0.190742	0.181909	0.171705	0.164807	0.152996	0.144381	0.141716	0.139332	0.134898	0.12778	0.127731	0.127782	0.122891	0.121311	0.122774	0.11348	0.115443	0.107984	0.108906	0.104317	0.107963	0.106441
col_iaa	0.0236775	0.0276035	0.0333708	0.0427381	0.0481817	0.0622989	0.0677408	0.0772065	0.0828051	0.0822939	0.087956	0.0891828	0.089921	0.0948552	0.100035	0.0999084	0.10516	0.101879	0.0920916	0.0829462	0.076607	0.0756402	0.0706985	0.0681486	0.0718619	0.0739911	0.0687383	0.0684827	0.0792018	0.0830853	0.0849604	0.0836459	0.0882923	0.0841399	0.0776703	0.0731324	0.0724431	0.0702388	0.0703805	0.0686921	0.0699678
col_iaa	0.0492209	0.0563555	0.0642999	0.0695984	0.0806787	0.0898489	0.11735	0.125816	0.128397	0.128127	0.133185	0.136484	0.14029	0.155983	0.157587	0.171783	0.189444	0.200458	0.205209	0.20799	0.205175	0.196154	0.181852	0.162441	0.153038	0.14316	0.134379	0.125039	0.123329	0.116329	0.105571	0.101327	0.0925922	0.0862948	0.0901725	0.082367	0.0811357	0.0806407	0.0761649	0.0749825	0.0803712
col_iaa	0.0214685	0.0242775	0.0283502	0.0360095	0.0340334	0.0478165	0.0602876	0.0663332	0.0652346	0.0760713	0.0801281	0.0844846	0.0944865	0.105647	0.113285	0.121847	0.124966	0.126006	0.134799	0.143948	0.150058	0.144207	0.139178	0.137371	0.130708	0.125938	0.122471	0.120526	0.115715	0.112116	0.108554	0.109761	0.10569	0.104635	0.104617	0.101026	0.0969264	0.0940689	0.0889891	0.08566	0.0870785
col_iaa	0.0572613	0.0519693	0.0532032	0.0505736	0.0593287	0.0701441	0.0702103	0.0631708	0.0773421	0.0895263	0.112853	0.119743	0.129616	0.139474	0.146056	0.146962	0.159966	0.162472	0.158297	0.150951	0.137547	0.118081	0.106567	0.0927312	0.0841712	0.0769608	0.0672014	0.0657472	0.0577462	0.0528319	0.0587881	0.0571942	0.0559394	0.0473495	0.0516224	0.0506907	0.0561382	0.0601706	0.0675966	0.0778358	0.0864438
col_iaa	0.0673412	0.0634711	0.0603236	0.0624127	0.065332	0.0720256	0.0690677	0.071154	0.0828695	0.068988	0.0669013	0.0765526	0.0687822	0.0791314	0.100474	0.130592	0.147664	0.163752	0.185212	0.1992	0.204417	0.197512	0.205254	0.19394	0.181528	0.170292	0.15636	0.148337	0.139951	0.135094	0.127371	0.126305	0.120219	0.113986	0.108169	0.110357	0.108316	0.105302	0.100084	0.0966644	0.093351
col_iaa	0.0472692	0.0443877	0.0381639	0.0374907	0.0290753	0.0310932	0.0292136	0.0347672	0.036932	0.0414419	0.0571483	0.0688085	0.0781084	0.0897915	0.105655	0.11712	0.119811	0.115535	0.126442	0.178457	0.191529	0.195688	0.191305	0.190761	0.1795	0.172512	0.163963	0.14852	0.151374	0.139144	0.130299	0.129532	0.120163	0.117329	0.107763	0.107046	0.0965676	0.096345	0.0944658	0.0881734	0.0922598
col_iaa	0.0550832	0.0529203	0.0509738	0.0550468	0.0687128	0.0657382	0.0671833	0.0591125	0.061853	0.0964011	0.126776	0.138646	0.143968	0.1505	0.154479	0.157308	0.160013	0.152378	0.150464	0.149177	0.141351	0.134543	0.124997	0.12157	0.120366	0.111924	0.10487	0.102872	0.100355	0.0979582	0.0879453	0.0955674	0.0958831	0.0891123	0.0863405	0.0856182	0.0841177	0.0823287	0.0759118	0.0696844	0.0808297
col_iaa	0.0769874	0.0827529	0.0875213	0.0869823	0.0936794	0.096465	0.0990294	0.107644	0.117174	0.119844	0.12925	0.13513	0.139382	0.15162	0.165762	0.173405	0.175875	0.182891	0.173344	0.170566	0.159228	0.151694	0.154945	0.129478	0.13247	0.131407	0.128897	0.128469	0.126115	0.123237	0.114079	0.117179	0.110148	0.110052	0.108895	0.105021	0.0924947	0.0967098	0.0964188	0.0970007	0.0993758
col_iaa	0.0314864	0.0289831	0.029839	0.0342765	0.0309802	0.0358723	0.0457771	0.0504462	0.0668603	0.0747376	0.0783651	0.0717935	0.0740643	0.111456	0.123552	0.134086	0.150636	0.149266	0.146258	0.141243	0.135693	0.127607	0.125717	0.119758	0.112481	0.102577	0.0957578	0.0888401	0.0869251	0.0885987	0.0845223	0.0849799	0.0874063	0.0796405	0.0767368	0.0747242	0.0799867	0.0816448	0.0778517	0.0857442	0.0883806
col_iaa	0.0557775	0.0560226	0.0596934	0.0629886	0.0670409	0.0676345	0.0729601	0.0802603	0.0834336	0.0872903	0.0974675	0.10093	0.10906	0.118229	0.118752	0.127114	0.146713	0.158536	0.17411	0.192811	0.204655	0.208317	0.217779	0.228433	0.224427	0.217662	0.202551	0.186922	0.173226	0.172511	0.167081	0.159703	0.152421	0.144371	0.135513	0.133814	0.131676	0.132577	0.128211	0.118843	0.11103
col_iaa	0.0441902	0.0444099	0.0403966	0.0426002	0.0538106	0.0532006	0.0587722	0.0617189	0.0692742	0.0811455	0.0847759	0.0915781	0.0988846	0.104499	0.110644	0.114711	0.116916	0.104308	0.0993193	0.0939545	0.085984	0.0730679	0.0653213	0.0549866	0.0555048	0.0484015	0.0489748	0.0490677	0.0457179	0.0485323	0.0459745	0.0441206	0.0481757	0.051355	0.0588037	0.0604094	0.0677696	0.0735339	0.0740551	0.0855917	0.0855553
col_iaa	0.0636685	0.0620535	0.0663149	0.0614633	0.069902	0.0765123	0.0704033	0.0782749	0.092034	0.107579	0.124025	0.137728	0.140128	0.159016	0.165743	0.175596	0.177096	0.173304	0.17749	0.169209	0.158298	0.147755	0.132883	0.124631	0.120849	0.12258	0.115607	0.112485	0.111223	0.107123	0.106514	0.109823	0.108833	0.106068	0.104727	0.0956535	0.0984273	0.100234	0.10155	0.103086	0.0991019
col_iaa	0.0526513	0.0625515	0.05963	0.0617099	0.0632258	0.0713158	0.076513	0.0803293	0.0785721	0.085298	0.0823072	0.0678855	0.0921292	0.0961233	0.102787	0.133266	0.159102	0.166224	0.177475	0.182785	0.18752	0.182167	0.171399	0.163129	0.160346	0.156035	0.142547	0.144588	0.13586	0.141157	0.14437	0.141257	0.13908	0.140645	0.134656	0.129702	0.127939	0.12349	0.122769	0.123177	0.113861
col_iaa	-0.00391567	-0.00849159	-0.00999169	-0.00635676	-0.00979978	-0.018506	-0.010444	-0.00778223	-0.00837517	-0.00229388	0.0114165	0.0158086	0.0169191	0.0309529	0.0422046	0.0533594	0.0634986	0.0792084	0.0961839	0.107999	0.106219	0.100777	0.093291	0.0782427	0.0710371	0.0569398	0.0551611	0.0464445	0.0463353	0.0409313	0.0398616	0.0386408	0.0347943	0.0371298	0.0394213	0.0400342	0.0458854	0.0432308	0.0417937	0.038953	0.0402195
col_iaa	-0.00529528	-0.00870442	-0.0118772	-0.0150178	-0.0117982	-0.0126674	-0.0124995	-0.00717359	-0.0106528	-0.00517278	-0.00664914	0.000805357	0.00316065	0.00877095	0.0128726	0.0267992	0.0348471	0.0457603	0.0608345	0.0698125	0.0855954	0.0952792	0.106363	0.0997373	0.0982155	0.0934235	0.0889418	0.0852354	0.0782831	0.0733248	0.0807723	0.0729498	0.0677036	0.0657775	0.0681096	0.0667227	0.0607009	0.055744	0.0546323	0.0493979	0.0485489
col_iaa	0.0103149	0.00891494	0.00984911	0.0134395	0.0189158	0.0232706	0.0288176	0.0382174	0.0410928	0.0327101	0.0301828	0.0305482	0.0279974	0.036521	0.0550266	0.0639365	0.0640495	0.0856992	0.0955845	0.103566	0.1206	0.115941	0.115985	0.108065	0.107313	0.103761	0.0983969	0.099287	0.0943644	0.0853211	0.0823687	0.0746734	0.0714207	0.0719014	0.0709997	0.064739	0.0565816	0.0598819	0.0532315	0.0512434	0.0530196
col_iaa	0.00816125	0.0123166	0.0133422	0.0119134	0.0177639	0.0176918	0.0234396	0.0278453	0.0230748	0.0311376	0.0271509	0.0346654	0.0394677	0.0444942	0.0750817	0.0918188	0.103367	0.115957	0.114491	0.102297	0.0989054	0.101717	0.0917058	0.0881961	0.0807152	0.0644236	0.0560118	0.0431188	0.0391357	0.0227369	0.0217508	0.0237828	0.0167747	0.0210064	0.0151976	0.019837	0.0162721	0.0194256	0.0175237	0.0183377	0.0154559
col_iaa	-0.00593611	-0.00387013	-0.00440747	-0.00380518	-0.00152061	-0.00133605	-0.00161813	-0.000678778	0.00899731	0.0140327	0.0095719	0.0115424	0.013862	0.0269511	0.0390232	0.0469777	0.0566779	0.0723168	0.0905906	0.109953	0.124282	0.144066	0.151081	0.149642	0.141686	0.145788	0.137355	0.129278	0.123875	0.108854	0.107962	0.105484	0.103806	0.101229	0.0971927	0.0949284	0.0886382	0.0916977	0.0866007	0.0886118	0.0881648
col_iaa	0.00796664	0.00336772	0.00276365	0.0022128	0.00131727	0.00154123	0.0112443	0.00790049	0.00541641	0.0102059	0.0166367	0.0249959	0.0214437	0.019298	0.0212782	0.0334511	0.0430577	0.0560235	0.0796138	0.0883095	0.0906314	0.10063	0.105296	0.0965627	0.0957544	0.0824965	0.0710663	0.0692637	0.0585579	0.0572216	0.0582571	0.0533338	0.0540825	0.0492932	0.0467203	0.0523522	0.0529956	0.0494898	0.0479073	0.0442606	0.0487362
col_iaa	0.0454818	0.0509334	0.0467207	0.0378744	0.0453867	0.0511725	0.0552925	0.0572365	0.0645009	0.0771023	0.0828494	0.0849603	0.0948091	0.105502	0.119555	0.137897	0.147252	0.149425	0.159417	0.169068	0.176637	0.17196	0.165327	0.150746	0.13485	0.114902	0.105046	0.0957705	0.0929817	0.0820137	0.0821546	0.0813703	0.077114	0.0653126	0.0604431	0.0623665	0.0613312	0.0589176	0.0555744	0.0530439	0.0472528
col_iaa	-0.00247159	-0.00730392	-0.0074984	-0.0108521	-0.00848119	-0.00999435	-0.0087197	-0.00841397	-0.00805815	-0.00882264	-0.00695435	-0.00466835	-0.00325896	0.00520456	0.0133598	0.0180334	0.0329192	0.0514571	0.0649115	0.0836115	0.097977	0.108196	0.108473	0.110842	0.107604	0.103892	0.0915209	0.0967531	0.0867105	0.0762018	0.073546	0.0768674	0.0771782	0.0670474	0.0622275	0.063988	0.0583968	0.0576114	0.0566821	0.0554677	0.0511359
col_iaa	0.00793966	0.00635758	0.00856464	0.00699726	0.0178539	0.0216529	0.0309958	0.0375638	0.0395728	0.0388676	0.0414634	0.0401544	0.0411733	0.0491064	0.04518	0.0515395	0.0504499	0.0429001	0.0364219	0.0342964	0.0239204	0.0220509	0.015664	0.00750136	0.00630787	-0.00507288	-0.0138684	-0.00265764	-0.00202932	-0.00279897	-0.00504037	-0.00374038	-0.00925247	-0.00850373	-0.00764106	-0.00148908	-0.000998376	0.00128658	0.00758502	0.0109091	0.00870526
col_iaa	-0.0131616	-0.0178898	-0.0128961	-0.00924039	-0.00933	-0.00310843	-0.00575696	-0.0032993	-0.000898662	0.00087606	0.0217306	0.0298662	0.0335397	0.0360421	0.0475719	0.0531547	0.0515853	0.0436786	0.0370001	0.0327669	0.0182588	0.0140343	-0.00106516	0.00197453	-0.00234044	-0.00317092	-0.00544675	-0.0106342	-0.0113655	-0.0182195	-0.0240444	-0.0164856	-0.0189666	-0.0184681	-0.0232283	-0.0260894	-0.0268608	-0.0303676	-0.0235113	-0.0210972	-0.0106983
aha_iaa	0.0295901	0.0389305	0.0449015	0.0524626	0.0549386	0.0599834	0.0728332	0.0810493	0.0904423	0.0883967	0.0882755	0.0896452	0.0937781	0.0946855	0.0949339	0.098903	0.0945847	0.0975444	0.100735	0.108466	0.108761	0.104869	0.101798	0.096619	0.0922107	0.0892652	0.0864773	0.0798389	0.0730177	0.0682765	0.0697701	0.0678172	0.0642121	0.0700975	0.0667482	0.0641979	0.0578561	0.0557997	0.0585038	0.0596455	0.0584837
aha_iaa	0.0524904	0.055987	0.0598131	0.0698884	0.0798933	0.0837976	0.0996764	0.104189	0.106951	0.110895	0.113454	0.117571	0.119575	0.129443	0.130585	0.13878	0.14604	0.158529	0.169286	0.172937	0.177275	0.179132	0.183611	0.180232	0.174971	0.167749	0.154893	0.150246	0.148257	0.142511	0.136103	0.129361	0.12905	0.122955	0.115588	0.104692	0.100725	0.100039	0.0983072	0.0957037	0.0875162
aha_iaa	0.0806963	0.0891284	0.0990363	0.113017	0.12685	0.134822	0.124498	0.124667	0.12104	0.156575	0.16369	0.158242	0.161419	0.167501	0.169198	0.184338	0.191895	0.202075	0.212179	0.219669	0.21372	0.208022	0.19246	0.178757	0.162138	0.143519	0.136341	0.130677	0.121905	0.117155	0.114955	0.114328	0.113615	0.111681	0.110467	0.108845	0.107661	0.103428	0.099609	0.0961431	0.0996552
aha_iaa	0.0348851	0.0331748	0.0264886	0.0405467	0.0456219	0.0512257	0.0566632	0.0684576	0.0700092	0.0777544	0.0798762	0.0879213	0.087082	0.085839	0.0940874	0.0970682	0.092825	0.105332	0.118101	0.120727	0.120218	0.126919	0.12538	0.11922	0.118386	0.113295	0.109245	0.105987	0.0989738	0.0945957	0.101779	0.107551	0.111031	0.110992	0.110423	0.111685	0.114929	0.114458	0.115648	0.113996	0.113604
aha_iaa	0.0331026	0.0357637	0.0428497	0.0459561	0.0539505	0.0634278	0.0689303	0.0768966	0.0787455	0.0790042	0.0742715	0.0727823	0.0730728	0.076449	0.0760094	0.0817919	0.0852555	0.0869671	0.0951342	0.0973254	0.0993478	0.107851	0.116842	0.119323	0.120758	0.113714	0.104651	0.100719	0.0885585	0.0846726	0.0850819	0.0868778	0.0811636	0.0847481	0.0824529	0.084837	0.0833514	0.083694	0.0860045	0.0894199	0.0932892
aha_iaa	0.04858	0.0541002	0.063011	0.0699326	0.0791957	0.0898765	0.0976843	0.0983265	0.0961116	0.089445	0.0977597	0.103254	0.112715	0.124359	0.131818	0.139766	0.150943	0.16533	0.177343	0.192958	0.199307	0.192823	0.181604	0.160805	0.140738	0.124423	0.114045	0.107393	0.10167	0.105478	0.104323	0.109622	0.110997	0.108216	0.112696	0.102514	0.104879	0.103002	0.107683	0.107944	0.113019
aha_iaa	0.0605176	0.0645599	0.0646436	0.0787785	0.0897671	0.0980534	0.109358	0.115788	0.118868	0.127929	0.134863	0.139457	0.143432	0.153469	0.156457	0.168121	0.177489	0.18448	0.193865	0.186681	0.166663	0.153068	0.140133	0.139307	0.1309	0.137738	0.137669	0.136438	0.133258	0.13278	0.135649	0.136765	0.133499	0.133988	0.136181	0.129952	0.128351	0.128374	0.129915	0.131397	0.130247
aha_iaa	0.0427661	0.0517864	0.0561598	0.0628017	0.0642054	0.0727188	0.0749203	0.0815243	0.0796646	0.085468	0.0830481	0.079315	0.0836581	0.084647	0.0781179	0.0866901	0.105649	0.10331	0.0966495	0.0869959	0.0742714	0.0756878	0.0733786	0.0658289	0.0640737	0.0666183	0.0639955	0.0656715	0.0632681	0.06187	0.0612758	0.0597154	0.0592855	0.0649634	0.070155	0.0670323	0.0665407	0.0684269	0.0672773	0.0697138	0.0728033
aha_iaa	0.0604869	0.0692603	0.0778133	0.0958399	0.110964	0.125428	0.134362	0.142927	0.147959	0.141666	0.138337	0.138731	0.142641	0.151909	0.15189	0.161635	0.170524	0.172794	0.188804	0.210539	0.221185	0.227272	0.229444	0.22548	0.21416	0.192923	0.175395	0.159329	0.148677	0.142774	0.136228	0.130605	0.129841	0.128429	0.13193	0.130566	0.122951	0.120432	0.11633	0.115421	0.115306
aha_iaa	0.0777817	0.0870637	0.102662	0.109588	0.11788	0.131313	0.140948	0.140948	0.143128	0.140644	0.139088	0.137582	0.137072	0.133208	0.125742	0.123015	0.115409	0.100292	0.0859389	0.0734963	0.0562561	0.0419819	0.0402387	0.0342368	0.0308952	0.0297504	0.0293513	0.0272131	0.0245471	0.0247929	0.0221173	0.0234554	0.023281	0.0217992	0.0163644	0.0124191	0.0186551	0.022229	0.0283835	0.0344165	0.0405715
aha_iaa	0.0284642	0.0218735	0.015393	0.0116348	0.00412734	0.00128036	0.00422911	0.0080445	0.019936	0.0355557	0.0417534	0.0527045	0.0627661	0.0749443	0.0883772	0.103236	0.115497	0.121252	0.130854	0.134289	0.142129	0.149261	0.160801	0.166061	0.168453	0.168019	0.166747	0.16113	0.161093	0.153175	0.148526	0.146209	0.13597	0.13919	0.135293	0.132532	0.134925	0.127384	0.125108	0.128911	0.124739
aha_iaa	0.0576147	0.0703738	0.0676888	0.0675237	0.0620551	0.0692957	0.0724278	0.079332	0.0816328	0.0919176	0.0926205	0.109865	0.123454	0.127824	0.14189	0.158235	0.176678	0.196941	0.210288	0.217408	0.21333	0.210113	0.199722	0.19392	0.183469	0.19959	0.203672	0.202645	0.217726	0.202188	0.198805	0.192704	0.188044	0.178675	0.172384	0.170797	0.168106	0.16426	0.16264	0.153902	0.14773
aha_iaa	0.0480214	0.0401852	0.0448813	0.0427332	0.0433068	0.035742	0.0375247	0.0402574	0.0365113	0.0539827	0.0662176	0.0671082	0.0759362	0.0906982	0.0980014	0.0996051	0.107291	0.113532	0.129007	0.134456	0.14716	0.160068	0.166249	0.177977	0.185712	0.194513	0.195438	0.19995	0.197675	0.190992	0.179844	0.180123	0.177146	0.170761	0.166273	0.159497	0.153692	0.153813	0.145823	0.141686	0.144765
aha_iaa	0.0614923	0.0660136	0.0606278	0.0706346	0.0653968	0.0714932	0.0755902	0.084681	0.087868	0.0961961	0.0986428	0.106126	0.113435	0.122929	0.123773	0.132474	0.132738	0.146167	0.155241	0.166553	0.16104	0.163248	0.16654	0.1668	0.164815	0.163848	0.165168	0.163198	0.15676	0.152715	0.156545	0.149594	0.151231	0.149286	0.146999	0.143623	0.136298	0.131787	0.129835	0.13091	0.129749
aha_iaa	0.0103636	0.0130636	0.0145332	0.0170111	0.0120896	0.00864629	0.0103176	0.0103348	0.0165525	0.0166146	0.0173147	0.0267353	0.0304399	0.038986	0.0356731	0.0385787	0.0408348	0.0457502	0.0606579	0.0770796	0.0871043	0.111746	0.129969	0.146576	0.156378	0.164258	0.172674	0.164784	0.160645	0.14858	0.14894	0.136783	0.134494	0.122524	0.124013	0.118005	0.116495	0.10919	0.103764	0.102402	0.101226
aha_iaa	0.0323263	0.0273485	0.0293739	0.0301075	0.0291564	0.0317403	0.0313075	0.0252447	0.0312182	0.0461462	0.0605174	0.0667248	0.0743693	0.0777157	0.0841163	0.0983881	0.116398	0.123314	0.113633	0.11556	0.110609	0.104784	0.0964284	0.0959533	0.0820212	0.0855286	0.078619	0.0695888	0.0598066	0.0563431	0.0496834	0.042588	0.0362799	0.0343608	0.0365935	0.032541	0.0319475	0.0213673	0.0240093	0.0247862	0.0254828
aha_iaa	0.0190071	0.0162412	0.0134744	0.011695	0.00950771	0.0118061	0.0192568	0.0198052	0.0248019	0.0334027	0.0338656	0.0402417	0.0409	0.0453078	0.055511	0.0604278	0.066222	0.0762989	0.0822248	0.0862527	0.0845852	0.0854113	0.0889193	0.0890701	0.0971599	0.0964447	0.0914399	0.090241	0.0912235	0.0743906	0.0735158	0.061443	0.0547235	0.0498811	0.0450732	0.043242	0.0343303	0.0352169	0.0380256	0.0361784	0.0360165
aha_iaa	0.00354935	0.00563165	8.54e-05	-0.00810929	-0.0153702	-0.0151588	-0.0168654	-0.0121526	-0.00532607	-2.21e-05	-0.00275524	0.00337963	0.00998086	0.0163747	0.0204441	0.0275029	0.0307947	0.0446506	0.0563551	0.0665763	0.0797438	0.0916347	0.0965911	0.107156	0.113185	0.122076	0.123808	0.11129	0.103761	0.11086	0.108997	0.107873	0.103701	0.106895	0.0993731	0.105191	0.0999831	0.0996922	0.101379	0.0995694	0.0945217
aha_iaa	0.007553	0.00191689	-0.00117835	-0.00521143	-0.0054709	-0.0072468	-0.00111528	0.000671542	0.00659894	0.0103835	0.0127129	0.0171818	0.019917	0.0257496	0.0274484	0.0294654	0.030367	0.0255309	0.0296943	0.0368202	0.0486053	0.0627363	0.0778251	0.101547	0.116843	0.123291	0.121434	0.127811	0.123491	0.116565	0.107731	0.100771	0.101148	0.102289	0.093056	0.091784	0.0850256	0.0758564	0.0797779	0.079607	0.0806184
aha_iaa	0.00935497	0.0149013	0.0196944	0.0230715	0.026	0.0310034	0.0368067	0.0399889	0.039556	0.0405975	0.0446373	0.0389506	0.044653	0.0534934	0.0606506	0.0676668	0.0689338	0.0763014	0.0802567	0.0820501	0.0771912	0.0710223	0.065149	0.0607653	0.0552197	0.0463829	0.0421848	0.0363195	0.031644	0.0226352	0.0193686	0.0136443	0.00599212	0.00552377	0.00360869	0.00184324	0.00316854	-0.00476147	-0.00235474	-0.00345396	-0.00396317
aha_iaa	-0.0174983	-0.0188668	-0.0173704	-0.0132222	-0.0154363	-0.0117422	-0.00483576	0.00289784	0.00789877	0.0183536	0.0173785	0.0188062	0.0207109	0.0250496	0.0244976	0.0283793	0.0349941	0.0393137	0.0404922	0.0485484	0.0597834	0.0720174	0.0897213	0.0979593	0.103608	0.107704	0.113778	0.108905	0.0991366	0.10011	0.0887431	0.0828482	0.0749742	0.0689197	0.0702756	0.0685198	0.0562265	0.0463294	0.0512727	0.052397	0.0478758
aha_iaa	-0.0202143	-0.0237527	-0.0296333	-0.0273485	-0.0218313	-0.0206643	-0.0180345	-0.00627503	0.000749128	0.00412531	0.00252517	0.00835138	0.0124698	0.0173757	0.0157532	0.0188793	0.0220378	0.0313755	0.0404116	0.0466138	0.0490662	0.0469114	0.0476913	0.0503417	0.0455834	0.04056	0.0325179	0.0297387	0.0313242	0.0304154	0.0284024	0.0307992	0.0290441	0.0278956	0.022843	0.0178362	0.0191077	0.0212302	0.0204503	0.0250169	0.024044
aha_iaa	-0.0153507	-0.016979	-0.020738	-0.0254119	-0.0289936	-0.0350037	-0.0399624	-0.0414412	-0.0390553	-0.0353518	-0.0320435	-0.0294808	-0.0244048	-0.0247138	-0.0173848	-0.0158996	-0.0113692	-0.00261159	0.00811891	0.0158227	0.0356726	0.0596886	0.0781598	0.0972865	0.105346	0.113342	0.121671	0.115319	0.108546	0.0936324	0.0945872	0.0946943	0.084002	0.0856813	0.0776813	0.0697749	0.0689248	0.0650027	0.0646769	0.0649284	0.0589527
aha_iaa	-0.0515037	-0.0481949	-0.0552409	-0.0596359	-0.0712428	-0.0782676	-0.0833992	-0.0856563	-0.0784309	-0.0791033	-0.0724818	-0.0685024	-0.0626937	-0.0548141	-0.0478015	-0.0419265	-0.0416138	-0.0408168	-0.0389576	-0.0333309	-0.0175169	0.00352738	0.0270426	0.0460035	0.0538303	0.0670584	0.0708567	0.0747309	0.0718758	0.0650867	0.0640466	0.0613277	0.0572875	0.0542618	0.0473291	0.0437131	0.041316	0.0380052	0.0286847	0.031462	0.0237247
aha_iaa	-0.0219135	-0.024945	-0.0353692	-0.0403702	-0.0439142	-0.0518673	-0.0633883	-0.0584356	-0.0606759	-0.0618313	-0.0612709	-0.0552908	-0.0498715	-0.0493341	-0.0420044	-0.0372054	-0.0246493	-0.00914837	0.0053505	0.0259892	0.0426784	0.0611039	0.0785558	0.0895608	0.0837222	0.0837049	0.0872438	0.0924072	0.0997627	0.107625	0.112236	0.104891	0.102706	0.0877041	0.0818816	0.0739873	0.0696506	0.0572375	0.0467427	0.047846	0.0416242
aha_iaa	-0.0124928	-0.0166654	-0.0228804	-0.0266045	-0.0325373	-0.0375641	-0.0340811	-0.0344191	-0.0289507	-0.0292556	-0.0281665	-0.0236604	-0.0183621	-0.0156921	-0.0126773	-0.00586127	-0.000114959	0.0120082	0.0185793	0.0348962	0.0434908	0.0609282	0.0787573	0.0917005	0.0966035	0.0920727	0.0831258	0.0804608	0.0781803	0.0737731	0.0712159	0.0683034	0.058519	0.0479352	0.0447831	0.0398154	0.0417801	0.0318738	0.0306382	0.0217872	0.0123477
aha_iaa	0.031	0.0312673	0.0320178	0.0344792	0.0336779	0.0361103	0.0432068	0.043845	0.0471806	0.0498713	0.0509512	0.050871	0.05974	0.0547384	0.0480429	0.0551812	0.0652682	0.0844794	0.0895094	0.0978326	0.089713	0.0880503	0.0851649	0.0849306	0.0878504	0.0839028	0.0897738	0.0734072	0.0709277	0.0627357	0.059198	0.0594357	0.0578907	0.0484093	0.0443776	0.03645	0.02937	0.0262042	0.0249919	0.0226479	0.0181012
aha_iaa	0.0118718	0.0142822	0.0242882	0.0322019	0.0328751	0.0378234	0.039574	0.03483	0.0354599	0.0410031	0.0442774	0.0485443	0.0548591	0.0584042	0.0639957	0.0690762	0.0800826	0.0930301	0.0966556	0.100948	0.107511	0.12159	0.129074	0.121262	0.121959	0.107881	0.102921	0.097655	0.0912674	0.0867192	0.0761319	0.0749532	0.0724648	0.0665931	0.0636713	0.0619384	0.0639263	0.0635872	0.0623744	0.061091	0.0589658
pp2c_iaa	0.0108498	0.0170642	0.0226586	0.0236811	0.0283695	0.0444346	0.0508578	0.0588962	0.0582285	0.0706651	0.0765435	0.0800478	0.0844631	0.0900383	0.0919144	0.0882753	0.080763	0.0720309	0.063556	0.0634578	0.0638526	0.0583769	0.0601128	0.0589247	0.0669215	0.0656334	0.0679009	0.0748186	0.0742149	0.0739445	0.0762597	0.0753502	0.0763314	0.0730392	0.0710641	0.0683585	0.0713867	0.0737047	0.0766334	0.0784144	0.0791137
pp2c_iaa	0.0389056	0.0430129	0.0469798	0.0588004	0.0664771	0.0791075	0.0800077	0.0887461	0.0916417	0.099858	0.108405	0.112144	0.123451	0.134439	0.148622	0.164801	0.176788	0.194237	0.206357	0.213274	0.203439	0.193576	0.185311	0.1656	0.159865	0.149569	0.145177	0.139463	0.134347	0.122507	0.123216	0.118198	0.118699	0.112464	0.107625	0.101039	0.0960877	0.0908748	0.0908547	0.080496	0.0792875
pp2c_iaa	0.0220566	0.0253527	0.034303	0.043091	0.0513783	0.0602485	0.0727828	0.0781586	0.0811055	0.0884411	0.0986433	0.107601	0.107076	0.112205	0.103579	0.0964096	0.0843072	0.0752497	0.0729672	0.0653599	0.0619053	0.0588992	0.0642939	0.0639045	0.0664989	0.0637267	0.0652723	0.0691083	0.0705786	0.0654711	0.0592986	0.0604961	0.0604819	0.0605372	0.0655828	0.0678739	0.0740619	0.0735481	0.0796163	0.0795167	0.0826612
pp2c_iaa	0.0423398	0.0253673	0.0310491	0.0356917	0.0347172	0.0733741	0.0870788	0.096847	0.0975057	0.10132	0.108025	0.113977	0.123672	0.140982	0.158257	0.175106	0.185942	0.187552	0.18666	0.173617	0.153184	0.141935	0.131312	0.115534	0.108639	0.0992652	0.0916311	0.0898771	0.0845154	0.0825694	0.0802652	0.0772656	0.0697087	0.0644028	0.052594	0.0490747	0.0480076	0.0454546	0.0449391	0.0460799	0.0439651
pp2c_iaa	0.0306831	0.032061	0.0381082	0.0473708	0.0558729	0.0628275	0.0762116	0.0907113	0.0993368	0.10444	0.115898	0.123579	0.13375	0.147351	0.152721	0.152045	0.148701	0.14803	0.140873	0.14266	0.135314	0.127106	0.119049	0.106564	0.105865	0.0989869	0.0952365	0.0945546	0.0946805	0.0949328	0.0922408	0.0934329	0.091173	0.0931904	0.0913815	0.0896148	0.0912565	0.0899098	0.0845232	0.0831789	0.078359
pp2c_iaa	0.029587	0.0327281	0.0412318	0.0473854	0.053875	0.0598508	0.0662779	0.0755449	0.0790293	0.0859362	0.0930599	0.0973169	0.100581	0.102302	0.0935546	0.0854703	0.0838572	0.0770347	0.0708888	0.0628341	0.057424	0.0533933	0.0544486	0.0511313	0.0527704	0.0566509	0.0541641	0.0594684	0.0618717	0.0634508	0.0672744	0.0719526	0.0778758	0.0796418	0.0825689	0.0834624	0.0852677	0.091089	0.0936666	0.0865657	0.0924346
pp2c_iaa	0.0469215	0.0552775	0.0578057	0.0591157	0.0722466	0.0747793	0.079475	0.092265	0.0941937	0.0971061	0.1065	0.104994	0.106575	0.117906	0.12057	0.128004	0.133297	0.13942	0.136414	0.129767	0.118532	0.110794	0.113102	0.111011	0.112686	0.116287	0.120061	0.119213	0.126055	0.124647	0.11986	0.122505	0.1257	0.12313	0.118471	0.119102	0.116532	0.118829	0.114909	0.11451	0.11723
pp2c_iaa	0.0572908	0.0585535	0.0699407	0.0811479	0.0879621	0.0973475	0.0962398	0.10372	0.105146	0.114292	0.119172	0.12644	0.139675	0.147053	0.15111	0.146906	0.135708	0.128367	0.124463	0.10015	0.0711216	0.0856582	0.0867586	0.0776733	0.0667189	0.0563678	0.0537714	0.0512084	0.053195	0.0527559	0.0585255	0.0608501	0.0667943	0.0761981	0.0840654	0.0956973	0.106261	0.108788	0.112777	0.115546	0.122722
pp2c_iaa	0.0203166	0.0211192	0.0262407	0.0312666	0.0234586	0.0300716	0.0327606	0.0404219	0.0472694	0.0602973	0.0693521	0.077054	0.0834396	0.0921733	0.0991486	0.11315	0.132416	0.143191	0.153178	0.153312	0.154691	0.154883	0.152948	0.150083	0.142262	0.133605	0.129031	0.125133	0.11473	0.103101	0.101097	0.0931329	0.0814973	0.0769512	0.0651978	0.0581085	0.0467443	0.0400494	0.0375652	0.0288948	0.0257523
pp2c_iaa	0.0318095	0.0270967	0.0280819	0.0321735	0.0319948	0.0426391	0.0473606	0.0568696	0.0627592	0.0781951	0.0913789	0.103387	0.115369	0.133395	0.141244	0.152944	0.148427	0.140233	0.129579	0.125482	0.121322	0.118465	0.111265	0.112255	0.112489	0.106124	0.0967118	0.0926577	0.0819982	0.0793857	0.0767469	0.0742573	0.0702532	0.0655821	0.0524227	0.0480357	0.0449992	0.0375338	0.0354122	0.0373371	0.0320745
pp2c_iaa	0.00573443	0.0128222	0.0145536	0.0224427	0.0227564	0.0288057	0.0370556	0.0437918	0.0547605	0.0699431	0.084004	0.100907	0.112965	0.120007	0.116769	0.104948	0.112746	0.101095	0.104008	0.0980243	0.0885583	0.080601	0.0720923	0.0593955	0.0461992	0.0368997	0.0336028	0.0325044	0.0318361	0.0267431	0.034597	0.0293633	0.0309203	0.0369405	0.0459469	0.0460826	0.0467415	0.0516369	0.0512904	0.0525446	0.0530873
pp2c_iaa	0.0552755	0.0560413	0.0658638	0.0700988	0.0776971	0.0814805	0.0877325	0.094679	0.0990893	0.106596	0.110612	0.114902	0.121816	0.128214	0.139351	0.147974	0.157981	0.163122	0.175363	0.172912	0.170188	0.16488	0.157583	0.150393	0.14317	0.139958	0.136356	0.134671	0.12907	0.12521	0.126297	0.117535	0.111463	0.107967	0.0987787	0.0949358	0.0964935	0.0924837	0.090566	0.0872956	0.0793954
pp2c_iaa	0.0232371	0.0232638	0.0293703	0.0316576	0.0426914	0.0483049	0.0556364	0.0694105	0.0805594	0.0949193	0.100395	0.109985	0.114982	0.133283	0.153521	0.169543	0.175157	0.176465	0.166983	0.165085	0.156529	0.150172	0.141236	0.1278	0.122664	0.119806	0.116058	0.106575	0.101055	0.0886792	0.088544	0.0745579	0.0740525	0.0720618	0.0657053	0.0628958	0.0587039	0.0601334	0.0586127	0.0605372	0.0606089
pp2c_iaa	0.016278	0.0205251	0.0260263	0.0250873	0.028167	0.0334875	0.0322381	0.0325025	0.0345873	0.0430777	0.0492983	0.0547809	0.0602757	0.0621285	0.0663912	0.0708059	0.067622	0.0694095	0.0645676	0.0569605	0.0537691	0.0616072	0.063337	0.0597787	0.0626617	0.065318	0.060209	0.0635039	0.0655796	0.0678453	0.0629389	0.0674395	0.0678138	0.0697285	0.0781792	0.0748171	0.0800222	0.081659	0.0804723	0.0848058	0.088677
pp2c_iaa	0.0216235	0.0252995	0.0367745	0.0307343	0.0369898	0.0467228	0.0459768	0.0530755	0.0569776	0.0588585	0.0633635	0.0561791	0.0560972	0.0437885	0.0323914	0.0208455	0.0148342	0.00623502	0.0110216	0.0093193	0.0138972	0.0172841	0.0161713	0.0232529	0.026276	0.0314577	0.0359924	0.0416483	0.0413363	0.0475891	0.0530801	0.0539198	0.0591342	0.0607332	0.0547025	0.0618746	0.0700387	0.0759423	0.0721947	0.0701412	0.0707098
pp2c_iaa	0.013925	0.0121544	0.0163561	0.0172903	0.0157314	0.0190736	0.0195022	0.00902318	0.0175522	0.0275398	0.0206751	0.0250938	0.0411517	0.0515268	0.0638259	0.081607	0.0917605	0.101452	0.111583	0.11005	0.106553	0.0925878	0.0875948	0.103129	0.105366	0.102889	0.100914	0.0932717	0.0859949	0.0827908	0.0831555	0.0846319	0.0825975	0.0825071	0.0798707	0.0753124	0.0793869	0.0807746	0.070519	0.0683222	0.0657178
pp2c_iaa	-0.0247287	-0.0226022	-0.0229387	-0.0170623	-0.0137341	-0.0119241	-0.0140086	-0.0170295	-0.0147686	-0.0137989	-0.00802411	-0.0139443	-0.00797857	0.00617076	0.0154547	0.0143496	0.0298018	0.0402486	0.0446796	0.0473814	0.0473217	0.0423949	0.0410083	0.0285358	0.0297818	0.0242252	0.0209607	0.022656	0.020468	0.0139432	0.0148335	0.00904503	0.00327673	-0.00365312	-0.0103701	-0.016826	-0.0136208	-0.0155122	-0.0222069	-0.0260832	-0.0209363
pp2c_iaa	-0.0138149	-0.0146587	-0.00920308	-0.00801128	-0.0044041	0.00138649	0.00583168	0.00679785	0.0150469	0.0240673	0.0278682	0.033581	0.0360171	0.039807	0.0304286	0.0228842	0.0153561	0.00385204	-0.00789069	-0.0112838	-0.0198274	-0.0216362	-0.0232256	-0.0192445	-0.0253342	-0.0245857	-0.0271235	-0.0330383	-0.0320072	-0.0312888	-0.030718	-0.0255308	-0.0269804	-0.031562	-0.0182697	-0.0154992	-0.0174285	-0.0179337	-0.0150692	-0.00487054	-0.00845405
pp2c_iaa	-0.0181909	-0.0167888	-0.00970905	-0.00660885	-0.00686991	0.000658283	0.00389768	0.00999163	0.0134154	0.0194828	0.0197042	0.0284913	0.0352964	0.0384906	0.0428786	0.0381056	0.0286485	0.0295261	0.017097	0.00982736	0.00838188	0.00570884	0.00419387	0.00500233	0.00238882	0.00471202	0.00215528	0.0029157	0.00530064	0.00623077	0.00567146	0.0129692	0.00980112	0.0113697	0.0185702	0.016869	0.0237769	0.0283257	0.0286238	0.0220223	0.027865

## Sheet: S2-2f
distance from root tip (µm)	0	20	40	60	80	100	120	140	160	180	200	220	240	260	280	300	320	340	360	380	400	420	440	460	480	500	520	540	560	580	600	620	640	660	680	700	720	740	760	780	800
Col0	1.00363	0.998096	1.00301	1.01279	1.01815	1.02795	1.03305	1.0357	1.04038	1.04357	1.03876	1.03814	1.04313	1.04517	1.05031	1.05891	1.06171	1.06691	1.06775	1.06082	1.05559	1.0517	1.04219	1.03321	1.02098	0.99396	0.968747	0.949551	0.934476	0.927468	0.91546	0.90158	0.894022	0.885374	0.876929	0.873565	0.871955	0.867947	0.861788	0.855143	0.849249
Col0	1.01585	1.02315	1.02833	1.03695	1.03755	1.04714	1.05334	1.06087	1.06577	1.06136	1.06626	1.07199	1.07744	1.08214	1.08231	1.09447	1.10237	1.10824	1.1129	1.10699	1.08416	1.07922	1.07074	1.05545	1.07163	1.06033	1.0348	1.01177	0.990626	0.969506	0.954804	0.935546	0.924448	0.912855	0.902549	0.898077	0.887027	0.877448	0.871165	0.862227	0.858297
Col0	0.997309	1.00245	1.00767	1.01506	1.02614	1.03718	1.03804	1.03838	1.04012	1.04671	1.05278	1.05567	1.05032	1.05093	1.04753	1.05633	1.06956	1.0956	1.10862	1.10969	1.10412	1.08701	1.06062	1.03657	1.02678	1.00818	0.984389	0.961944	0.948047	0.937548	0.928867	0.915466	0.901555	0.890204	0.873375	0.865014	0.856194	0.84736	0.844822	0.840783	0.828037
Col0	0.97549	0.984425	0.987594	0.990165	1.00096	1.01044	1.00956	1.0027	1.00366	1.01054	1.00815	1.02697	1.04096	1.05211	1.06521	1.07156	1.0692	1.0582	1.043	1.04066	1.02717	1.0117	0.990462	0.972046	0.958291	0.941625	0.928454	0.921474	0.912675	0.898149	0.888291	0.883721	0.87131	0.860584	0.851632	0.847106	0.843237	0.834099	0.829649	0.830538	0.824411
Col0	1.00773	1.01171	1.01669	1.01853	1.02566	1.02767	1.02825	1.03285	1.03839	0.996111	1.00424	1.00676	1.02324	1.04404	1.05197	1.0585	1.06651	1.06448	1.06508	1.06231	1.05879	1.06033	1.05458	1.03904	1.03048	1.019	0.998966	0.98138	0.955368	0.936917	0.925993	0.912591	0.904552	0.892259	0.884581	0.879446	0.866392	0.857379	0.846623	0.84218	0.840335
Col0	1.04855	1.06048	1.06219	1.07642	1.07838	1.08472	1.08864	1.0872	1.09043	1.09794	1.07318	1.07343	1.07399	1.07898	1.09978	1.12441	1.12031	1.11323	1.10469	1.09307	1.07452	1.04547	1.02497	1.00529	0.990029	0.974345	0.959236	0.947329	0.938855	0.926876	0.921865	0.91554	0.914728	0.913877	0.915967	0.916829	0.916061	0.911226	0.910963	0.911714	0.908635
Col0	1.00136	1.00197	1.00449	1.0043	1.00517	0.994494	0.979395	0.993436	0.990518	0.987729	0.993241	1.00304	1.01043	1.01679	1.02005	1.02349	1.01618	1.01185	1.00238	0.992973	0.979526	0.967848	0.962695	0.946186	0.933112	0.921551	0.910892	0.899864	0.892933	0.885024	0.877186	0.866976	0.861018	0.858209	0.857334	0.856895	0.851681	0.850832	0.848591	0.848039	0.846866
Col0	0.948876	0.951613	0.954247	0.948964	0.945556	0.946724	0.954268	0.950498	0.949999	0.950226	0.957206	0.96374	0.967242	0.968869	0.97925	0.986782	1.00053	1.00508	1.01224	1.02142	1.02607	1.03102	1.02351	1.01497	0.996588	0.974739	0.956366	0.933325	0.914657	0.900547	0.884083	0.877254	0.861219	0.854722	0.840951	0.839118	0.830188	0.821261	0.819441	0.812007	0.807307
Col0	1.0081	1.02016	1.02567	1.03697	1.05017	1.06095	1.0706	1.07891	1.0834	1.08389	1.09255	1.1003	1.11318	1.12267	1.12996	1.1319	1.14016	1.15125	1.16001	1.16892	1.16831	1.15635	1.13425	1.10649	1.07997	1.05401	1.028	1.00154	0.989031	0.968712	0.952343	0.941452	0.925853	0.910462	0.896816	0.886824	0.873154	0.864502	0.849109	0.843901	0.83715
Col0	0.993109	0.991409	0.990062	0.993968	0.992742	0.996063	1.00008	1.0056	1.00271	1.00413	1.0062	1.01174	1.01405	1.01568	1.01636	1.01558	1.02497	1.02674	1.02664	1.0228	1.0151	1.0002	0.987112	0.973919	0.963138	0.94896	0.940446	0.922801	0.910811	0.898072	0.888518	0.877231	0.869602	0.858544	0.851875	0.84788	0.841898	0.835974	0.836195	0.832616	0.823652
Col0	1.01227	1.02165	1.03198	1.03914	1.04538	1.05552	1.06377	1.068	1.07333	1.08752	1.08985	1.09547	1.09885	1.09884	1.10339	1.09249	1.07643	1.0908	1.10152	1.1323	1.14766	1.14221	1.13084	1.11398	1.0951	1.07161	1.05179	1.02747	1.01242	1.00504	0.986646	0.969105	0.963657	0.946945	0.936223	0.924337	0.916222	0.911072	0.899449	0.893639	0.885728
Col0	1.01325	1.0194	1.022	1.0265	1.03836	1.05902	1.07129	1.07364	1.07631	1.08852	1.08695	1.0851	1.09035	1.09666	1.10097	1.1022	1.10005	1.09977	1.10291	1.09281	1.08105	1.06258	1.04181	1.02797	1.01135	0.99894	0.987498	0.975355	0.966125	0.948816	0.932016	0.929685	0.920065	0.914569	0.904073	0.897025	0.889871	0.886312	0.884428	0.880241	0.874429
Col0	0.993458	1.00149	1.00787	1.02149	1.03135	1.03391	1.03944	1.04626	1.05187	1.05047	1.05432	1.06285	1.06964	1.06438	1.06464	1.07209	1.07515	1.07579	1.07942	1.07482	1.07557	1.06592	1.05402	1.03864	1.02865	1.01725	0.998072	0.986176	0.968885	0.960957	0.94467	0.933939	0.92559	0.919049	0.903413	0.893315	0.885292	0.872851	0.863341	0.857876	0.849862
Col0	0.990535	0.999294	1.00637	1.01573	1.02077	1.02802	1.03725	1.04219	1.05149	1.05287	1.06324	1.07097	1.07627	1.08209	1.0834	1.07677	1.07131	1.06406	1.03775	1.02197	1.01188	1.00706	0.982992	0.969677	0.952858	0.939272	0.9227	0.907369	0.899943	0.888193	0.873624	0.869099	0.856513	0.856252	0.847094	0.845503	0.841684	0.835081	0.830231	0.826424	0.823442
Col0	0.965407	0.978855	0.983593	0.990942	0.994328	0.994667	0.98657	0.990241	0.992602	1.00031	1.01438	1.02269	1.03039	1.02438	1.0225	1.01827	1.01136	1.00258	0.987787	0.977049	0.963995	0.955245	0.936432	0.925148	0.912262	0.894612	0.884957	0.869258	0.856953	0.854874	0.846218	0.839429	0.830688	0.826123	0.821647	0.814969	0.808927	0.804319	0.804748	0.805677	0.802622
Col0	0.987662	0.997076	1.00963	1.00914	0.991303	0.994363	1.00085	1.00936	1.02574	1.03474	1.02892	1.02693	1.02917	1.02098	1.0227	1.01634	1.00895	1.00204	0.987456	0.973294	0.944612	0.930439	0.918301	0.894065	0.879279	0.870144	0.854049	0.850513	0.840183	0.835746	0.832872	0.828652	0.829595	0.82469	0.82132	0.829468	0.827085	0.828752	0.832111	0.834133	0.834382
Col0	1.03742	1.04321	1.05326	1.0582	1.06708	1.07647	1.08499	1.08785	1.08682	1.08356	1.07818	1.0749	1.07867	1.08375	1.08867	1.08437	1.08942	1.09029	1.0905	1.09475	1.09399	1.0868	1.07875	1.0592	1.04302	1.01906	1.00381	0.984681	0.964481	0.949747	0.935591	0.926604	0.914897	0.902646	0.895633	0.890033	0.881512	0.867433	0.864554	0.855584	0.85319
Col0	1.00421	1.00228	1.00574	1.00269	0.995739	1.00179	1.00975	1.01382	1.01101	1.01327	1.0121	1.00692	1.00602	1.01176	1.00871	1.00394	0.996599	0.994986	0.978992	0.963672	0.94442	0.925711	0.91001	0.895672	0.883475	0.874357	0.861745	0.857733	0.852287	0.845999	0.844762	0.837563	0.835924	0.837715	0.837816	0.833891	0.827022	0.82756	0.825527	0.819446	0.820089
Col0	1.01453	1.0187	1.02769	1.02893	1.03619	1.04471	1.0482	1.05597	1.05789	1.05887	1.05682	1.06447	1.068	1.07857	1.08785	1.0919	1.10791	1.11969	1.12584	1.12876	1.12533	1.1108	1.09743	1.08245	1.0659	1.0511	1.02833	1.00763	0.988951	0.975095	0.970321	0.960201	0.945292	0.937265	0.921467	0.917382	0.910065	0.900042	0.900849	0.890783	0.880565
Col0	0.990408	0.991832	1.00086	1.00442	1.00567	1.00624	1.01042	1.01505	1.01974	1.02346	1.02497	1.02756	1.03713	1.03638	1.03093	1.0324	1.02656	1.00952	0.983817	0.984524	1.00543	0.984913	0.968483	0.950127	0.928526	0.909064	0.888744	0.876422	0.859598	0.85346	0.843209	0.836443	0.826542	0.823031	0.816004	0.81207	0.804662	0.804043	0.800203	0.795594	0.790586
Col0	0.99085	1.0044	1.01164	1.01857	1.02654	1.04086	1.0441	1.05642	1.06198	1.06414	1.08144	1.08366	1.09897	1.10641	1.12106	1.12898	1.13201	1.13294	1.12968	1.12532	1.11413	1.09226	1.07047	1.05151	1.02251	1.00431	0.984375	0.963515	0.951358	0.939745	0.927878	0.915825	0.903799	0.898059	0.893382	0.888367	0.881546	0.878802	0.869114	0.86477	0.858312
aha2	0.991644	0.993318	0.994135	0.998257	0.999234	0.99572	0.995081	0.995088	0.989622	0.993021	1.00146	1.02029	1.02529	1.02948	1.03256	1.03035	1.03572	1.02196	1.01224	0.991742	0.967495	0.958131	0.948294	0.93532	0.91961	0.912829	0.905917	0.899173	0.891198	0.884055	0.873206	0.869786	0.86224	0.86056	0.861602	0.859069	0.857819	0.854026	0.854574	0.86219	0.859331
aha2	0.975411	0.977267	0.978032	0.988331	0.993279	1.0019	1.01054	1.01137	1.02076	1.0249	1.03577	1.04003	1.03648	1.03059	1.03339	1.01771	1.00655	0.998034	0.986478	0.967893	0.946312	0.931758	0.919475	0.911126	0.899884	0.893229	0.88851	0.879786	0.876871	0.873357	0.875778	0.868073	0.862425	0.858732	0.856525	0.862479	0.858605	0.862664	0.86171	0.864709	0.862283
aha2	0.985632	0.99351	0.997694	1.00598	1.00606	1.01083	1.01122	1.0166	1.01763	1.01876	1.02805	1.03028	1.03468	1.02974	1.02879	1.02849	1.02017	0.999521	0.979502	0.961128	0.949758	0.933713	0.930642	0.919417	0.908159	0.90047	0.889943	0.889504	0.884058	0.878407	0.878542	0.878236	0.87372	0.872409	0.87535	0.874384	0.874216	0.87553	0.883614	0.887772	0.88787
aha2	0.992174	0.997586	0.99735	1.00401	1.00559	1.01046	1.02209	1.02838	1.02822	1.03034	1.0336	1.03773	1.04826	1.0514	1.04868	1.04318	1.03372	1.02024	1.0092	1.00259	0.984662	0.96138	0.954076	0.94736	0.939053	0.929594	0.918934	0.908698	0.898629	0.897161	0.882417	0.877435	0.874004	0.87151	0.867356	0.862298	0.858992	0.862358	0.857691	0.861301	0.863899
aha2	0.973787	0.97909	0.981794	0.982698	0.988042	0.988176	0.992146	0.990999	0.990696	0.998358	1.00123	0.9923	0.981869	0.971956	0.965889	0.952373	0.940847	0.931846	0.924859	0.918363	0.909588	0.899788	0.893207	0.888096	0.883292	0.880132	0.87798	0.876785	0.876462	0.869598	0.870101	0.870994	0.869772	0.875675	0.879454	0.884199	0.887058	0.882015	0.885661	0.889569	0.89413
aha2	0.987729	0.988214	1.0008	1.00311	1.00666	1.00712	1.01594	1.01748	1.02706	1.031	1.02923	1.03575	1.04054	1.03553	1.01209	1.00398	0.999496	0.996426	0.987838	0.976061	0.961636	0.947047	0.934885	0.926562	0.912652	0.909194	0.903345	0.897866	0.88893	0.88736	0.88249	0.881251	0.877896	0.881106	0.881018	0.875338	0.878014	0.884491	0.886123	0.885359	0.887008
aha2	1.02296	1.02553	1.02882	1.03921	1.03637	1.03629	1.03013	1.0239	1.0305	1.05221	1.0624	1.06525	1.06787	1.06601	1.06385	1.06181	1.05558	1.04172	1.03111	1.01419	0.999811	0.988	0.97271	0.967963	0.953487	0.941071	0.939733	0.931017	0.923882	0.91105	0.908338	0.900608	0.899558	0.895655	0.894501	0.890463	0.891231	0.887519	0.887543	0.882884	0.887213
aha2	0.988506	0.998776	1.00282	1.00618	1.00951	1.00695	1.01819	1.02844	1.02636	1.03402	1.03555	1.03496	1.03108	1.02164	1.00909	0.997213	0.985272	0.969339	0.95639	0.94488	0.938503	0.927222	0.918974	0.917803	0.9088	0.907156	0.903837	0.899632	0.901724	0.900594	0.899532	0.903671	0.902203	0.899388	0.897067	0.898185	0.901923	0.90049	0.906907	0.904106	0.901242
aha2	0.983556	0.987611	0.987671	0.994385	0.976619	0.99485	1.01122	1.01397	1.02422	1.03182	1.03372	1.03737	1.04271	1.048	1.04835	1.04906	1.03976	1.0314	1.01281	0.993847	0.98824	0.976446	0.966276	0.950808	0.942679	0.929414	0.932271	0.919044	0.910549	0.909487	0.898679	0.890069	0.882383	0.88588	0.881822	0.877739	0.872939	0.871232	0.872676	0.870103	0.871651
aha2	0.985811	0.995395	0.998969	1.00593	1.00734	1.01641	1.02129	1.02369	1.02816	1.03348	1.04123	1.03766	1.03799	1.04254	1.04532	1.04071	1.03134	1.02001	1.00381	0.989726	0.978463	0.969421	0.957763	0.946786	0.93551	0.926184	0.920947	0.912972	0.906429	0.901921	0.896192	0.891312	0.88731	0.885683	0.882842	0.881309	0.877846	0.884171	0.880718	0.879482	0.88665
aha2	0.983712	0.985819	1.00182	1.00331	1.00583	1.01389	1.01764	1.01828	1.01828	1.02764	1.03246	1.03432	1.04265	1.04909	1.06005	1.05591	1.05541	1.04955	1.04004	1.02747	1.01551	1.00239	0.985414	0.969863	0.960045	0.948452	0.938674	0.931014	0.926241	0.918111	0.910361	0.907309	0.903157	0.892575	0.888934	0.883772	0.880905	0.878395	0.875448	0.879127	0.8762
aha2	0.990779	0.999237	0.996387	1.0071	1.01305	1.01414	1.0221	1.02575	1.02616	1.02732	1.03331	1.03973	1.05187	1.05741	1.05754	1.05386	1.05123	1.05132	1.03605	1.02358	1.01022	0.994337	0.97962	0.967901	0.964029	0.954466	0.944914	0.933866	0.926268	0.916205	0.907674	0.909671	0.902094	0.894893	0.890664	0.879455	0.883448	0.879853	0.87874	0.875982	0.87708
aha2	1.00662	1.0162	1.01794	1.02231	1.02537	1.03258	1.04578	1.05779	1.05691	1.06906	1.07003	1.07073	1.08015	1.08444	1.0826	1.08489	1.09121	1.08819	1.08117	1.07029	1.06721	1.05514	1.034	1.02036	1.00498	0.985519	0.975316	0.970721	0.95891	0.94816	0.938504	0.930728	0.915456	0.908051	0.901635	0.890313	0.887577	0.875643	0.87866	0.87252	0.869356
aha2	0.996929	1.00462	1.00583	1.01124	1.01403	1.01846	1.02442	1.03136	1.02832	1.03628	1.04106	1.04719	1.05828	1.06448	1.07306	1.08688	1.10349	1.11112	1.10606	1.09236	1.0755	1.06304	1.03339	1.02027	0.997248	0.981784	0.965524	0.951137	0.932373	0.929171	0.922875	0.913653	0.908079	0.899932	0.895623	0.893056	0.88632	0.887971	0.873533	0.870309	0.863943
aha2	0.965322	0.971363	0.972022	0.97891	0.986691	0.987238	0.99103	0.993875	0.999946	1.00632	1.01151	1.0162	1.01883	1.01616	1.01409	1.00353	0.988094	0.979622	0.959563	0.940847	0.92587	0.918231	0.904826	0.895702	0.890489	0.87934	0.878182	0.878207	0.87732	0.876457	0.874963	0.870259	0.867201	0.86973	0.868435	0.871173	0.870268	0.868217	0.873897	0.874245	0.871668
aha2	0.987883	0.986363	0.994529	1.00291	1.01369	1.00966	1.01321	1.02207	1.03029	1.03718	1.0431	1.04925	1.05823	1.06189	1.06036	1.05082	1.0397	1.03826	1.02548	1.0042	0.988957	0.981162	0.969126	0.954147	0.946825	0.929588	0.923776	0.91606	0.90415	0.901159	0.894724	0.887386	0.881655	0.87882	0.868418	0.871762	0.867033	0.864772	0.867917	0.86426	0.85751
aha2	0.992926	1.00149	1.00818	1.01275	1.01872	1.02448	1.02998	1.03937	1.03938	1.03728	1.05778	1.06581	1.07281	1.07747	1.08669	1.08473	1.09867	1.09765	1.08984	1.08107	1.06686	1.05538	1.03507	1.01271	0.9952	0.98241	0.96932	0.960778	0.951169	0.943358	0.936137	0.930681	0.917547	0.916558	0.910135	0.902051	0.902501	0.895881	0.894979	0.888727	0.881948
aha2	0.991435	1.00306	1.00486	1.0102	1.00708	1.01644	1.01974	1.02463	1.02891	1.03357	1.04083	1.05159	1.06118	1.06275	1.06382	1.05645	1.026	1.01251	0.998593	0.985597	0.974028	0.969262	0.962884	0.954288	0.935239	0.928896	0.922857	0.916524	0.910421	0.89811	0.900948	0.894193	0.892076	0.891016	0.885412	0.890794	0.887951	0.884297	0.891761	0.893463	0.897418
aha2	0.953969	0.955154	0.95767	0.964766	0.973058	0.973329	0.97897	0.99025	0.997537	1.01084	1.01958	1.01675	1.01341	1.00523	0.990182	0.975682	0.96417	0.952894	0.936683	0.924392	0.919329	0.910648	0.901946	0.897451	0.897071	0.896203	0.889219	0.88441	0.880602	0.881801	0.877405	0.876408	0.878928	0.878339	0.877843	0.882938	0.882995	0.885547	0.889291	0.881716	0.888808
aha2	0.958647	0.961244	0.961647	0.964512	0.969156	0.979895	0.981982	0.98766	0.985759	0.977257	1.00011	1.00968	1.01205	1.01448	1.01759	1.01798	1.01662	1.00381	0.993947	0.974495	0.958091	0.944355	0.932317	0.923751	0.917605	0.906268	0.902014	0.895459	0.894617	0.887445	0.881567	0.877701	0.870458	0.865763	0.863663	0.863665	0.858349	0.860214	0.853811	0.853267	0.853789
pp2ctriple	1.03719	1.04033	1.0529	1.06114	1.0654	1.07486	1.08001	1.08422	1.09432	1.09605	1.10107	1.10708	1.11489	1.12238	1.12914	1.13888	1.14487	1.14764	1.14814	1.13387	1.11404	1.09439	1.07258	1.05566	1.02719	1.00451	0.989799	0.965617	0.951027	0.93731	0.924052	0.912531	0.907618	0.895749	0.884208	0.877322	0.871606	0.864779	0.852951	0.846698	0.844982
pp2ctriple	1.06133	1.06842	1.07238	1.08034	1.08976	1.10403	1.11403	1.12123	1.12139	1.13076	1.12153	1.1202	1.12762	1.1435	1.1614	1.18966	1.1938	1.20726	1.21372	1.21116	1.21282	1.20468	1.18106	1.14848	1.11651	1.09204	1.06295	1.04493	1.0189	1.00078	0.987277	0.973698	0.962484	0.947184	0.936961	0.926946	0.918205	0.911851	0.907186	0.908019	0.898887
pp2ctriple	1.00363	1.00895	1.01079	1.01452	1.02162	1.02871	1.03745	1.04456	1.04408	1.04635	1.03587	1.04345	1.0638	1.06806	1.08094	1.08975	1.10728	1.11349	1.11886	1.11158	1.10344	1.08491	1.06189	1.03677	1.0148	0.985332	0.96872	0.954198	0.940552	0.930066	0.917307	0.902058	0.893102	0.885024	0.877592	0.867082	0.856998	0.852714	0.85358	0.850678	0.842666
pp2ctriple	1.04572	1.05234	1.06635	1.08106	1.08208	1.096	1.09613	1.10327	1.10702	1.10934	1.11261	1.11744	1.13813	1.14242	1.15247	1.17014	1.17763	1.18325	1.18941	1.17344	1.15996	1.13789	1.11833	1.097	1.0661	1.03872	1.01738	1.00205	0.983537	0.971182	0.960187	0.949084	0.946224	0.938777	0.931894	0.922083	0.918986	0.904874	0.900257	0.899922	0.890849
pp2ctriple	1.00969	1.01313	1.01547	1.01887	1.02155	1.02444	1.0305	1.03334	1.03726	1.04281	1.04375	1.05041	1.05171	1.06137	1.06503	1.07476	1.08924	1.08935	1.09415	1.09628	1.08652	1.07624	1.06571	1.04548	1.0293	1.00965	0.994109	0.973667	0.95792	0.947655	0.931909	0.924256	0.916495	0.908639	0.903069	0.891519	0.885158	0.876545	0.878191	0.872539	0.862249
pp2ctriple	0.927456	0.927778	0.927598	0.925383	0.924511	0.923155	0.926576	0.933386	0.926093	0.922843	0.932529	0.940857	0.942371	0.950677	0.953489	0.956884	0.965755	0.972113	0.97879	0.981175	0.983118	0.978186	0.979681	0.96951	0.954577	0.945746	0.934541	0.914862	0.896028	0.88534	0.877601	0.873621	0.85937	0.855283	0.850488	0.841256	0.835194	0.828778	0.821702	0.818588	0.815308
pp2ctriple	0.931742	0.927483	0.930684	0.930872	0.929325	0.931445	0.934802	0.931039	0.938924	0.93879	0.93503	0.936561	0.937842	0.934885	0.935435	0.936958	0.930656	0.92978	0.936263	0.937288	0.935289	0.925989	0.919645	0.919841	0.911614	0.907763	0.899885	0.889274	0.884873	0.875174	0.869385	0.864994	0.862418	0.856645	0.853361	0.850099	0.844941	0.836942	0.830803	0.82365	0.819944
pp2ctriple	0.899903	0.900864	0.903743	0.898933	0.897975	0.895121	0.896671	0.888441	0.89042	0.891056	0.897415	0.899734	0.900962	0.905235	0.902823	0.908901	0.908144	0.915071	0.918565	0.913416	0.916866	0.917128	0.915688	0.917871	0.917161	0.90907	0.898087	0.89364	0.884913	0.878126	0.870467	0.864977	0.863592	0.852913	0.845144	0.840834	0.836839	0.830362	0.830047	0.826792	0.822914
pp2ctriple	0.948337	0.948918	0.947414	0.946242	0.947388	0.952004	0.960207	0.954422	0.958382	0.960406	0.961721	0.968332	0.974009	0.983138	0.990607	0.987018	1.00042	1.01302	1.01867	1.02306	1.03155	1.02915	1.03332	1.0324	1.02141	1.0024	0.990536	0.967788	0.959565	0.958374	0.946442	0.926241	0.900678	0.906139	0.906376	0.894414	0.879954	0.864163	0.86528	0.855856	0.852883
pp2ctriple	0.981339	0.982662	0.989256	0.983692	0.991718	0.997032	0.999013	1.00892	1.00674	1.01174	1.01442	1.02478	1.03178	1.03906	1.04105	1.04092	1.0485	1.05556	1.05961	1.06321	1.06142	1.05182	1.033	1.02172	1.00111	0.986564	0.976197	0.962129	0.945253	0.928612	0.925222	0.915743	0.903856	0.890677	0.880276	0.871953	0.868218	0.859791	0.854138	0.846212	0.832099
pp2ctriple	0.938896	0.934857	0.932265	0.932973	0.931546	0.935583	0.932783	0.93106	0.936047	0.939458	0.943439	0.952916	0.963163	0.963416	0.967853	0.975358	0.983567	0.985923	0.994511	0.998501	1.00389	1.00354	0.999829	0.98696	0.979653	0.97814	0.961469	0.95128	0.941829	0.922339	0.908296	0.892931	0.880967	0.878723	0.866109	0.857796	0.847565	0.838526	0.829898	0.827919	0.824658
pp2ctriple	0.950258	0.949344	0.954118	0.952392	0.955311	0.951464	0.950701	0.954678	0.953966	0.965506	0.963168	0.96428	0.962705	0.958625	0.946077	0.935729	0.938771	0.931915	0.921595	0.909196	0.905691	0.904429	0.898749	0.882489	0.873917	0.869983	0.862025	0.860037	0.856104	0.853393	0.844871	0.8409	0.842587	0.838131	0.832496	0.829809	0.826148	0.827634	0.826291	0.826225	0.828228
pp2ctriple	0.956661	0.959772	0.957177	0.96111	0.956454	0.952833	0.960555	0.959981	0.963559	0.962713	0.965276	0.965429	0.973294	0.978837	0.988062	0.992861	0.996224	1.01074	1.01496	1.01768	1.01873	1.0186	1.01212	1.00051	0.991119	0.975285	0.959545	0.943655	0.930059	0.918078	0.909771	0.90062	0.890585	0.891329	0.882257	0.871852	0.872369	0.861018	0.85799	0.854419	0.847155
pp2ctriple	0.958399	0.96416	0.966787	0.967239	0.968873	0.967517	0.950864	0.945787	0.952282	0.956084	0.975766	0.98371	0.989863	0.993158	0.986936	0.985951	0.98788	0.989645	0.978223	0.983259	0.979165	0.978441	0.969121	0.951379	0.929626	0.913427	0.892871	0.879483	0.869734	0.867069	0.857946	0.849298	0.84819	0.831522	0.824597
pp2ctriple	0.997526	1.00536	1.01499	1.02029	1.02601	1.03499	1.04621	1.04968	1.05022	1.04908	1.04637	1.05606	1.05757	1.06146	1.06294	1.06504	1.08735	1.10317	1.11741	1.11773	1.10859	1.09756	1.09657	1.06207	1.03835	1.02408	1.00499	0.985094	0.973489	0.960633	0.950846	0.947032	0.933749	0.922702	0.914778	0.911797	0.907474	0.901153	0.89631	0.889226	0.879877
pp2ctriple	0.968134	0.974345	0.980608	0.993192	1.0085	1.02015	1.03086	1.03355	1.03355	1.03361	1.03035	1.03979	1.05349	1.06281	1.06836	1.0834	1.08922	1.09927	1.10168	1.10371	1.10138	1.09658	1.07511	1.06256	1.04876	1.03115	1.00403	0.984847	0.977881	0.954085	0.942399	0.928689	0.916852	0.905995	0.889062	0.880607	0.874484	0.872062	0.860421	0.851807	0.84158
pp2ctriple	0.91294	0.919397	0.924722	0.925349	0.929051	0.932755	0.935292	0.93781	0.93845	0.941064	0.943855	0.949845	0.936657	0.952922	0.96147	0.964612	0.977755	0.979485	0.986763	0.998483	1.0041	1.00291	1.00337	1.00862	1.00663	0.999575	0.98738	0.976326	0.968355	0.959675	0.943063	0.929133	0.914543	0.896368	0.886025	0.876944	0.865512	0.854544	0.846	0.839525	0.840012
pp2ctriple	0.934962	0.936002	0.941603	0.947659	0.953469	0.95806	0.963924	0.97075	0.970544	0.977742	0.981867	0.984767	0.999926	1.00902	1.01088	1.01902	1.03025	1.03529	1.04417	1.04984	1.04909	1.04866	1.04136	1.03652	1.02539	1.01505	0.996267	0.979171	0.969344	0.958127	0.942713	0.934896	0.927831	0.922773	0.916255	0.906689	0.907075	0.896742	0.887935	0.880987	0.878972
pp2ctriple	0.949579	0.952045	0.95997	0.96471	0.970015	0.972369	0.980204	0.989684	1.00297	1.00222	0.992924	0.991087	0.997067	1.00796	1.02478	1.037	1.05211	1.06557	1.08452	1.09671	1.10641	1.10949	1.11609	1.10638	1.09268	1.08009	1.06091	1.04509	1.02294	1.0062	0.988212	0.971845	0.959152	0.942346	0.92969	0.916234	0.904282	0.888126	0.880303	0.866626	0.856826
pp2ctriple	0.974923	0.985177	0.990574	1.00294	1.01901	1.02208	1.03414	1.0382	1.05221	1.05463	1.05403	1.05706	1.06458	1.06655	1.06961	1.06913	1.10653	1.10884	1.10402	1.10486	1.10034	1.09921	1.08566	1.0647	1.04905	1.02754	1.01059	0.994811	0.977602	0.965973	0.946199	0.935235	0.921898	0.917335	0.902051	0.893475	0.880174	0.871758	0.862247	0.861152	0.85744
pp2ctriple	0.937619	0.945953	0.941518	0.946381	0.957836	0.96974	0.967981	0.967681	0.966214	0.968066	0.956686	0.96076	0.970113	0.977021	0.987742	0.99202	1.00172	0.997137	1.0012	1.0031	1.01386	1.01392	1.00169	0.987542	0.971953	0.958296	0.92931	0.912405	0.919208	0.909576	0.897119	0.884327	0.874801	0.876824	0.872176	0.870131	0.86496	0.855023	0.846632	0.843526	0.84451
pp2ctriple	0.920989	0.929195	0.93196	0.930777	0.928402	0.93287	0.942408	0.938467	0.937104	0.9459	0.943543	0.94711	0.947993	0.955916	0.961839	0.97103	0.982236	0.987	0.991353	0.989389	0.994965	0.990036	0.974199	0.963165	0.94968	0.932298	0.919603	0.909233	0.901213	0.892397	0.884562	0.875225	0.869639	0.872279	0.868652	0.865359	0.866468	0.862726	0.862705	0.860498	0.855056
pp2ctriple	0.962076	0.965528	0.972574	0.982087	0.986068	0.987699	0.994033	1.00469	1.00392	1.01998	1.02234	1.02097	1.02909	1.03332	1.04014	1.05932	1.06772	1.07646	1.08545	1.09709	1.11137	1.12169	1.12418	1.11227	1.10939	1.09534	1.07619	1.05386	1.03348	1.01165	0.998978	0.97707	0.963825	0.953056	0.939835	0.921045	0.909693	0.895821	0.886586	0.878511	0.868791
pp2ctriple	0.961984	0.972602	0.973848	0.980018	0.982717	0.992831	1.00161	1.00241	1.02767	1.02794	1.03474	1.03922	1.03787	1.03927	1.04436	1.04802	1.0598	1.0699	1.08059	1.09148	1.10248	1.10315	1.10329	1.09029	1.08232	1.06763	1.04884	1.02927	1.00902	0.986528	0.963323	0.946064	0.921159	0.902247	0.886516	0.871987	0.856448	0.842176	0.833944	0.820274	0.816626
pp2ctriple	0.974187	0.980979	0.996427	0.999166	1.01744	1.02205	1.02765	1.03199	1.03301	1.03186	1.03237	1.03552	1.03928	1.01568	1.01756	1.02842	1.05542	1.06192	1.06977	1.06333	1.06962	1.06659	1.0633	1.0494	1.03389	1.01657	0.993128	0.973579	0.951773	0.933965	0.918174	0.910207	0.896299	0.878617	0.870146	0.861878	0.855473	0.852169	0.84682	0.840823	0.837786
pp2ctriple	0.985201	0.993936	0.995543	1.0039	1.01265	1.00816	1.00391	1.00469	0.994916	1.00102	1.00989	1.02888	1.03572	1.03644	1.04392	1.05408	1.05877	1.05894	1.05576	1.05713	1.04851	1.04779	1.03834	1.0286	1.01436	1.00602	0.991552	0.974595	0.966071	0.955909	0.936951	0.92323	0.912141	0.903837	0.894909	0.886138	0.880517	0.877168	0.865353	0.865772	0.85883
pp2ctriple	1.00831	1.01632	1.02556	1.03186	1.04612	1.05342	1.06632	1.06809	1.06866	1.08282	1.08273	1.07415	1.06695	1.08781	1.09262	1.1031	1.10211	1.09547	1.08666	1.08415	1.07363	1.05724	1.0498	1.03249	1.0212	1.00722	0.989814	0.980758	0.969384	0.959935	0.946645	0.936415	0.925689	0.916792	0.909911	0.903049	0.895121	0.884842	0.879134	0.874473	0.873085
pp2ctriple	0.973537	0.974226	0.979725	0.98697	0.985711	0.988899	0.994524	0.993164	1.0171	1.03297	1.04016	1.04937	1.05512	1.06012	1.07366	1.08493	1.09624	1.10382	1.11791	1.12322	1.11913	1.1218	1.11328	1.09839	1.08563	1.057	1.0389	1.0276	1.00801	0.989949	0.977867	0.967679	0.953422	0.942082	0.925648	0.914475	0.904535	0.897252	0.888677	0.881498	0.882743
pp2ctriple	0.957955	0.960921	0.957544	0.960257	0.962669	0.964012	0.971545	0.97274	0.974867	0.976085	0.978972	0.98669	0.99477	1.00457	1.01128	1.01934	1.03087	1.03521	1.04411	1.05685	1.05835	1.06249	1.0539	1.04525	1.03214	1.02002	1.00356	0.988407	0.964375	0.952077	0.937816	0.926214	0.913258	0.903883	0.90048	0.888445	0.884593	0.874107	0.868288	0.863665	0.858755
pp2ctriple	0.971467	0.973758	0.974105	0.983734	0.989603	1.00041	1.01562	1.02248	1.03117	1.03157	1.03213	1.03047	1.03511	1.04798	1.05459	1.06249	1.07235	1.07987	1.08967	1.09231	1.09481	1.0948	1.08795	1.07913	1.06705	1.04842	1.02985	1.01247	0.998025	0.97712	0.958858	0.941659	0.926877	0.908729	0.904201	0.89518	0.882997	0.875404	0.867027	0.862891	0.858665
pp2ctriple	0.97965	0.974915	0.98276	0.985703	0.988352	0.994063	0.995475	1.0032	1.00915	1.01221	1.01729	1.01658	1.01754	1.02662	1.03806	1.04577	1.05368	1.05908	1.07027	1.08501	1.09198	1.09069	1.07671	1.09419	1.08771	1.07882	1.05504	1.03965	1.034	1.01046	0.992415	0.979209	0.968942	0.954111	0.944522	0.935757	0.925301	0.914481	0.904586	0.896319	0.889988
pp2ctriple	0.948534	0.954027	0.959045	0.961443	0.959995	0.969952	0.967685	0.973107	0.991455	1.00387	1.00725	1.00829	1.00617	1.00656	1.01658	1.01944	1.02306	1.02689	1.0335	1.03652	1.04475	1.04376	1.04524	1.04943	1.04361	1.03968	1.02292	1.02682	1.00894	0.990089	0.977053	0.959138	0.946727	0.935004	0.920962	0.907428	0.898566	0.888507	0.874658	0.867001	0.857049
pp2ctriple	0.959343	0.964784	0.966888	0.969139	0.971103	0.979865	0.979946	0.978696	0.979686	0.981876	0.98242	0.987659	0.990393	0.997607	1.00428	1.00357	1.00724	1.02315	1.02723	1.03208	1.03564	1.03633	1.03347	1.02602	1.02237	1.00634	0.996976	1.00186	1.00458	0.992996	0.977092	0.962904	0.951403	0.93927	0.932247	0.91821	0.905426	0.890065	0.878555	0.869337	0.862452
pp2ctriple	0.911509	0.918495	0.923849	0.924067	0.927143	0.930185	0.939066	0.942002	0.941967	0.941833	0.945557	0.945412	0.95232	0.960662	0.96565	0.977703	0.979309	0.988021	0.989122	0.991348	1.00092	1.00389	1.00582	0.991704	0.989952	0.977313	0.95618	0.93942	0.926048	0.918061	0.901599	0.890226	0.880396	0.868507	0.854251	0.846764	0.833406	0.828284	0.823978	0.819605	0.810376
pp2ctriple	0.940975	0.94662	0.963913	0.971187	0.972943	0.978003	0.9855	0.984772	0.983153	0.978153	0.981797	0.979592	0.98758	0.993398	1.00128	1.02163	1.02085	1.02496	1.02537	1.03815	1.03658	1.02918	1.02634	1.05337	1.02845	1.01394	1.02096	1.01222	0.993375	0.981773	0.978965	0.963291	0.950412	0.939428	0.921028	0.882537	0.879246	0.884033	0.874552	0.870687	0.86463
pp2ctriple	0.97843	0.987781	0.990594	0.988523	0.992427	0.9906	0.994836	1.00566	1.0197	1.02346	1.02455	1.0222	1.03176	1.03211	1.03836	1.03895	1.03402	1.03116	1.02291	1.01528	1.0277	1.02417	1.04899	1.04543	1.01044	1.00772	1.00689	0.984074	0.975256	0.946535	0.919726	0.922504	0.927661	0.92127	0.885673	0.885779	0.87979	0.87922	0.875492	0.869974	0.868542
pp2ctriple	0.936614	0.933125	0.935866	0.93543	0.938591	0.942825	0.937819	0.934289	0.937668	0.93946	0.941613	0.943415	0.946259	0.945352	0.955406	0.959701	0.967394	0.974157	0.978989	0.987066	0.996101	0.997677	0.996688	1.00049	0.985535	0.973574	0.961488	0.944827	0.93065	0.919015	0.903363	0.893745	0.891792	0.875907	0.865837	0.86023	0.849786	0.836197	0.831091	0.82366	0.822647
pp2ctriple	0.97832	0.985168	0.982064	0.982821	0.992093	0.993827	0.999867	0.999154	1.00481	1.00752	1.0077	1.00959	1.01137	1.01496	1.02756	1.03152	1.03635	1.04566	1.05218	1.0614	1.06329	1.05795	1.05651	1.04472	1.03122	1.01125	0.995952	0.983521	0.965589	0.951956	0.93929	0.930554	0.919223	0.913437	0.898859	0.891053	0.881283	0.874552	0.866761	0.870405	0.86591
pp2ctriple	0.961171	0.961601	0.963795	0.964647	0.973326	0.977295	0.975868	0.976162	0.976504	0.970341	0.958435	0.961082	0.963436	0.977127	0.988712	0.993328	0.999865	1.00457	1.0129	1.01893	1.01951	1.01365	1.00504	0.993745	0.984101	0.972654	0.959218	0.950134	0.940019	0.920426	0.906872	0.898033	0.886963	0.881778	0.876113	0.871758	0.865581	0.858268	0.855001	0.851207	0.850443

## Sheet: S2-2g
condition	length (µm)	elongation (µm/min)
col_iaa	55.463	1.84877	0.69848
col_iaa	49.503	1.6501	0.623422
col_iaa	54.849	1.8283	0.690747
col_iaa	84.062	2.80207	1.05864
col_iaa	62.274	2.0758	0.784255
col_iaa	70.615	2.35383	0.889298
col_iaa	59.563	1.98543	0.750113
col_iaa	61.605	2.0535	0.775829
col_iaa	70.409	2.34697	0.886704
col_iaa	56.39	1.87967	0.710154
col_iaa	59.206	1.97353	0.745617
col_iaa	53.034	1.7678	0.66789
col_iaa	37.046	1.23487	0.466543
col_iaa	40.342	1.34473	0.508052
col_iaa	53.731	1.79103	0.676667
col_iaa	61.996	2.06653	0.780754
col_iaa	45.371	1.51237	0.571385
col_iaa	50.707	1.69023	0.638584
col_iaa	40.581	1.3527	0.511061
col_iaa	58.217	1.94057	0.733162
col_iaa	45.782	1.52607	0.576561
col_iaa	43.23	1.441	0.544422
col_iaa	36.371	1.21237	0.458042
col_iaa	62.121	2.0707	0.782328
col_iaa	52.444	1.74813	0.877936
aha_iaa	38.504	1.28347	0.644574
aha_iaa	37.4	1.24667	0.626093
aha_iaa	34.453	1.14843	0.576759
aha_iaa	53.945	1.79817	0.903064
aha_iaa	31.02	1.034	0.519289
aha_iaa	36.354	1.2118	0.608582
aha_iaa	40.837	1.36123	0.68363
aha_iaa	39.912	1.3304	0.668145
aha_iaa	37.594	1.25313	0.62934
aha_iaa	46.213	1.54043	0.773626
aha_iaa	39.98	1.33267	0.669283
aha_iaa	74.648	2.48827	1.24964
aha_iaa	74.929	2.49763	1.25435
pp2c_iaa	60.997	2.03323	0.662865
pp2c_iaa	51.705	1.7235	0.561887
pp2c_iaa	80.452	2.68173	0.874286
pp2c_iaa	47.072	1.56907	0.51154
pp2c_iaa	80.843	2.69477	0.878535
pp2c_iaa	57.844	1.92813	0.628601
pp2c_iaa	56.972	1.89907	0.619125
pp2c_iaa	73.317	2.4439	0.796749
pp2c_iaa	66.277	2.20923	0.720244
pp2c_iaa	68.3	2.27667	0.742228
pp2c_iaa	59.95	1.99833	0.651487
pp2c_iaa	67.055	2.23517	0.728698
pp2c_iaa	62.225	2.07417	0.67621
pp2c_iaa	70.99	2.36633	0.771461
pp2c_iaa	63.008	2.10027	0.684719
pp2c_iaa	90.832	3.02773	0.987087
pp2c_iaa	73.634	2.45447	0.800194
pp2c_iaa	83.774	2.79247	0.910387
pp2c_iaa	79.024	2.63413	0.858768
pp2c_iaa	103.001	3.43337	1.11933
pp2c_iaa	69.265	2.30883	0.752715
pp2c_iaa	47.335	1.57783	0.514398
pp2c_iaa	47.329	1.57763	0.514333
pp2c_iaa	51.577	1.71923	0.560496
pp2c_iaa	66.44	2.21467	0.722015
pp2c_iaa	48.005	1.60017	0.521679
pp2c_iaa	34.153	1.13843	0.371147
pp2c_iaa	60.515	2.01717	0.657627
pp2c_iaa	53.211	1.7737	0.578253
pp2c_iaa	30.044	1.00147	0.326493
pp2c_iaa	60.536	2.01787	0.657855
pp2c_iaa	59.748	1.9916	0.649292
pp2c_iaa	76.543	2.55143	0.831806
pp2c_iaa	62.461	2.08203	0.678775
pp2c_iaa	57.815	1.92717	0.628286
pp2c_iaa	60.282	2.0094	0.655095
pp2c_iaa	64.199	2.13997	0.697662
pp2c_iaa	44.547	1.4849	0.4841
pp2c_iaa	66.994	2.23313	0.728036

## Sheet: S2-2i
distance from root tip (µm)	0	20	40	60	80	100	120	140	160	180	200	220	240	260	280	300	320	340	360	380	400	420	440	460	480	500	520	540	560	580	600	620	640	660	680	700	720	740	760	780	800
col_cm	1.00363	0.998096	1.00301	1.01279	1.01815	1.02795	1.03305	1.0357	1.04038	1.04357	1.03876	1.03814	1.04313	1.04517	1.05031	1.05891	1.06171	1.06691	1.06775	1.06082	1.05559	1.0517	1.04219	1.03321	1.02098	0.99396	0.968747	0.949551	0.934476	0.927468	0.91546	0.90158	0.894022	0.885374	0.876929	0.873565	0.871955	0.867947	0.861788	0.855143	0.849249
col_cm	1.01585	1.02315	1.02833	1.03695	1.03755	1.04714	1.05334	1.06087	1.06577	1.06136	1.06626	1.07199	1.07744	1.08214	1.08231	1.09447	1.10237	1.10824	1.1129	1.10699	1.08416	1.07922	1.07074	1.05545	1.07163	1.06033	1.0348	1.01177	0.990626	0.969506	0.954804	0.935546	0.924448	0.912855	0.902549	0.898077	0.887027	0.877448	0.871165	0.862227	0.858297
col_cm	0.997309	1.00245	1.00767	1.01506	1.02614	1.03718	1.03804	1.03838	1.04012	1.04671	1.05278	1.05567	1.05032	1.05093	1.04753	1.05633	1.06956	1.0956	1.10862	1.10969	1.10412	1.08701	1.06062	1.03657	1.02678	1.00818	0.984389	0.961944	0.948047	0.937548	0.928867	0.915466	0.901555	0.890204	0.873375	0.865014	0.856194	0.84736	0.844822	0.840783	0.828037
col_cm	0.97549	0.984425	0.987594	0.990165	1.00096	1.01044	1.00956	1.0027	1.00366	1.01054	1.00815	1.02697	1.04096	1.05211	1.06521	1.07156	1.0692	1.0582	1.043	1.04066	1.02717	1.0117	0.990462	0.972046	0.958291	0.941625	0.928454	0.921474	0.912675	0.898149	0.888291	0.883721	0.87131	0.860584	0.851632	0.847106	0.843237	0.834099	0.829649	0.830538	0.824411
col_cm	1.00773	1.01171	1.01669	1.01853	1.02566	1.02767	1.02825	1.03285	1.03839	0.996111	1.00424	1.00676	1.02324	1.04404	1.05197	1.0585	1.06651	1.06448	1.06508	1.06231	1.05879	1.06033	1.05458	1.03904	1.03048	1.019	0.998966	0.98138	0.955368	0.936917	0.925993	0.912591	0.904552	0.892259	0.884581	0.879446	0.866392	0.857379	0.846623	0.84218	0.840335
col_cm	1.04855	1.06048	1.06219	1.07642	1.07838	1.08472	1.08864	1.0872	1.09043	1.09794	1.07318	1.07343	1.07399	1.07898	1.09978	1.12441	1.12031	1.11323	1.10469	1.09307	1.07452	1.04547	1.02497	1.00529	0.990029	0.974345	0.959236	0.947329	0.938855	0.926876	0.921865	0.91554	0.914728	0.913877	0.915967	0.916829	0.916061	0.911226	0.910963	0.911714	0.908635
col_cm	1.00136	1.00197	1.00449	1.0043	1.00517	0.994494	0.979395	0.993436	0.990518	0.987729	0.993241	1.00304	1.01043	1.01679	1.02005	1.02349	1.01618	1.01185	1.00238	0.992973	0.979526	0.967848	0.962695	0.946186	0.933112	0.921551	0.910892	0.899864	0.892933	0.885024	0.877186	0.866976	0.861018	0.858209	0.857334	0.856895	0.851681	0.850832	0.848591	0.848039	0.846866
col_cm	0.948876	0.951613	0.954247	0.948964	0.945556	0.946724	0.954268	0.950498	0.949999	0.950226	0.957206	0.96374	0.967242	0.968869	0.97925	0.986782	1.00053	1.00508	1.01224	1.02142	1.02607	1.03102	1.02351	1.01497	0.996588	0.974739	0.956366	0.933325	0.914657	0.900547	0.884083	0.877254	0.861219	0.854722	0.840951	0.839118	0.830188	0.821261	0.819441	0.812007	0.807307
col_cm	1.0081	1.02016	1.02567	1.03697	1.05017	1.06095	1.0706	1.07891	1.0834	1.08389	1.09255	1.1003	1.11318	1.12267	1.12996	1.1319	1.14016	1.15125	1.16001	1.16892	1.16831	1.15635	1.13425	1.10649	1.07997	1.05401	1.028	1.00154	0.989031	0.968712	0.952343	0.941452	0.925853	0.910462	0.896816	0.886824	0.873154	0.864502	0.849109	0.843901	0.83715
col_cm	0.993109	0.991409	0.990062	0.993968	0.992742	0.996063	1.00008	1.0056	1.00271	1.00413	1.0062	1.01174	1.01405	1.01568	1.01636	1.01558	1.02497	1.02674	1.02664	1.0228	1.0151	1.0002	0.987112	0.973919	0.963138	0.94896	0.940446	0.922801	0.910811	0.898072	0.888518	0.877231	0.869602	0.858544	0.851875	0.84788	0.841898	0.835974	0.836195	0.832616	0.823652
col_cm	1.01227	1.02165	1.03198	1.03914	1.04538	1.05552	1.06377	1.068	1.07333	1.08752	1.08985	1.09547	1.09885	1.09884	1.10339	1.09249	1.07643	1.0908	1.10152	1.1323	1.14766	1.14221	1.13084	1.11398	1.0951	1.07161	1.05179	1.02747	1.01242	1.00504	0.986646	0.969105	0.963657	0.946945	0.936223	0.924337	0.916222	0.911072	0.899449	0.893639	0.885728
col_cm	1.01325	1.0194	1.022	1.0265	1.03836	1.05902	1.07129	1.07364	1.07631	1.08852	1.08695	1.0851	1.09035	1.09666	1.10097	1.1022	1.10005	1.09977	1.10291	1.09281	1.08105	1.06258	1.04181	1.02797	1.01135	0.99894	0.987498	0.975355	0.966125	0.948816	0.932016	0.929685	0.920065	0.914569	0.904073	0.897025	0.889871	0.886312	0.884428	0.880241	0.874429
col_cm	0.993458	1.00149	1.00787	1.02149	1.03135	1.03391	1.03944	1.04626	1.05187	1.05047	1.05432	1.06285	1.06964	1.06438	1.06464	1.07209	1.07515	1.07579	1.07942	1.07482	1.07557	1.06592	1.05402	1.03864	1.02865	1.01725	0.998072	0.986176	0.968885	0.960957	0.94467	0.933939	0.92559	0.919049	0.903413	0.893315	0.885292	0.872851	0.863341	0.857876	0.849862
col_cm	0.990535	0.999294	1.00637	1.01573	1.02077	1.02802	1.03725	1.04219	1.05149	1.05287	1.06324	1.07097	1.07627	1.08209	1.0834	1.07677	1.07131	1.06406	1.03775	1.02197	1.01188	1.00706	0.982992	0.969677	0.952858	0.939272	0.9227	0.907369	0.899943	0.888193	0.873624	0.869099	0.856513	0.856252	0.847094	0.845503	0.841684	0.835081	0.830231	0.826424	0.823442
col_cm	0.965407	0.978855	0.983593	0.990942	0.994328	0.994667	0.98657	0.990241	0.992602	1.00031	1.01438	1.02269	1.03039	1.02438	1.0225	1.01827	1.01136	1.00258	0.987787	0.977049	0.963995	0.955245	0.936432	0.925148	0.912262	0.894612	0.884957	0.869258	0.856953	0.854874	0.846218	0.839429	0.830688	0.826123	0.821647	0.814969	0.808927	0.804319	0.804748	0.805677	0.802622
col_cm	0.987662	0.997076	1.00963	1.00914	0.991303	0.994363	1.00085	1.00936	1.02574	1.03474	1.02892	1.02693	1.02917	1.02098	1.0227	1.01634	1.00895	1.00204	0.987456	0.973294	0.944612	0.930439	0.918301	0.894065	0.879279	0.870144	0.854049	0.850513	0.840183	0.835746	0.832872	0.828652	0.829595	0.82469	0.82132	0.829468	0.827085	0.828752	0.832111	0.834133	0.834382
col_cm	1.03742	1.04321	1.05326	1.0582	1.06708	1.07647	1.08499	1.08785	1.08682	1.08356	1.07818	1.0749	1.07867	1.08375	1.08867	1.08437	1.08942	1.09029	1.0905	1.09475	1.09399	1.0868	1.07875	1.0592	1.04302	1.01906	1.00381	0.984681	0.964481	0.949747	0.935591	0.926604	0.914897	0.902646	0.895633	0.890033	0.881512	0.867433	0.864554	0.855584	0.85319
col_cm	1.00421	1.00228	1.00574	1.00269	0.995739	1.00179	1.00975	1.01382	1.01101	1.01327	1.0121	1.00692	1.00602	1.01176	1.00871	1.00394	0.996599	0.994986	0.978992	0.963672	0.94442	0.925711	0.91001	0.895672	0.883475	0.874357	0.861745	0.857733	0.852287	0.845999	0.844762	0.837563	0.835924	0.837715	0.837816	0.833891	0.827022	0.82756	0.825527	0.819446	0.820089
col_cm	1.01453	1.0187	1.02769	1.02893	1.03619	1.04471	1.0482	1.05597	1.05789	1.05887	1.05682	1.06447	1.068	1.07857	1.08785	1.0919	1.10791	1.11969	1.12584	1.12876	1.12533	1.1108	1.09743	1.08245	1.0659	1.0511	1.02833	1.00763	0.988951	0.975095	0.970321	0.960201	0.945292	0.937265	0.921467	0.917382	0.910065	0.900042	0.900849	0.890783	0.880565
col_cm	0.990408	0.991832	1.00086	1.00442	1.00567	1.00624	1.01042	1.01505	1.01974	1.02346	1.02497	1.02756	1.03713	1.03638	1.03093	1.0324	1.02656	1.00952	0.983817	0.984524	1.00543	0.984913	0.968483	0.950127	0.928526	0.909064	0.888744	0.876422	0.859598	0.85346	0.843209	0.836443	0.826542	0.823031	0.816004	0.81207	0.804662	0.804043	0.800203	0.795594	0.790586
col_cm	0.99085	1.0044	1.01164	1.01857	1.02654	1.04086	1.0441	1.05642	1.06198	1.06414	1.08144	1.08366	1.09897	1.10641	1.12106	1.12898	1.13201	1.13294	1.12968	1.12532	1.11413	1.09226	1.07047	1.05151	1.02251	1.00431	0.984375	0.963515	0.951358	0.939745	0.927878	0.915825	0.903799	0.898059	0.893382	0.888367	0.881546	0.878802	0.869114	0.86477	0.858312
aha_cm	0.991644	0.993318	0.994135	0.998257	0.999234	0.99572	0.995081	0.995088	0.989622	0.993021	1.00146	1.02029	1.02529	1.02948	1.03256	1.03035	1.03572	1.02196	1.01224	0.991742	0.967495	0.958131	0.948294	0.93532	0.91961	0.912829	0.905917	0.899173	0.891198	0.884055	0.873206	0.869786	0.86224	0.86056	0.861602	0.859069	0.857819	0.854026	0.854574	0.86219	0.859331
aha_cm	0.975411	0.977267	0.978032	0.988331	0.993279	1.0019	1.01054	1.01137	1.02076	1.0249	1.03577	1.04003	1.03648	1.03059	1.03339	1.01771	1.00655	0.998034	0.986478	0.967893	0.946312	0.931758	0.919475	0.911126	0.899884	0.893229	0.88851	0.879786	0.876871	0.873357	0.875778	0.868073	0.862425	0.858732	0.856525	0.862479	0.858605	0.862664	0.86171	0.864709	0.862283
aha_cm	0.985632	0.99351	0.997694	1.00598	1.00606	1.01083	1.01122	1.0166	1.01763	1.01876	1.02805	1.03028	1.03468	1.02974	1.02879	1.02849	1.02017	0.999521	0.979502	0.961128	0.949758	0.933713	0.930642	0.919417	0.908159	0.90047	0.889943	0.889504	0.884058	0.878407	0.878542	0.878236	0.87372	0.872409	0.87535	0.874384	0.874216	0.87553	0.883614	0.887772	0.88787
aha_cm	0.992174	0.997586	0.99735	1.00401	1.00559	1.01046	1.02209	1.02838	1.02822	1.03034	1.0336	1.03773	1.04826	1.0514	1.04868	1.04318	1.03372	1.02024	1.0092	1.00259	0.984662	0.96138	0.954076	0.94736	0.939053	0.929594	0.918934	0.908698	0.898629	0.897161	0.882417	0.877435	0.874004	0.87151	0.867356	0.862298	0.858992	0.862358	0.857691	0.861301	0.863899
aha_cm	0.973787	0.97909	0.981794	0.982698	0.988042	0.988176	0.992146	0.990999	0.990696	0.998358	1.00123	0.9923	0.981869	0.971956	0.965889	0.952373	0.940847	0.931846	0.924859	0.918363	0.909588	0.899788	0.893207	0.888096	0.883292	0.880132	0.87798	0.876785	0.876462	0.869598	0.870101	0.870994	0.869772	0.875675	0.879454	0.884199	0.887058	0.882015	0.885661	0.889569	0.89413
aha_cm	0.987729	0.988214	1.0008	1.00311	1.00666	1.00712	1.01594	1.01748	1.02706	1.031	1.02923	1.03575	1.04054	1.03553	1.01209	1.00398	0.999496	0.996426	0.987838	0.976061	0.961636	0.947047	0.934885	0.926562	0.912652	0.909194	0.903345	0.897866	0.88893	0.88736	0.88249	0.881251	0.877896	0.881106	0.881018	0.875338	0.878014	0.884491	0.886123	0.885359	0.887008
aha_cm	1.02296	1.02553	1.02882	1.03921	1.03637	1.03629	1.03013	1.0239	1.0305	1.05221	1.0624	1.06525	1.06787	1.06601	1.06385	1.06181	1.05558	1.04172	1.03111	1.01419	0.999811	0.988	0.97271	0.967963	0.953487	0.941071	0.939733	0.931017	0.923882	0.91105	0.908338	0.900608	0.899558	0.895655	0.894501	0.890463	0.891231	0.887519	0.887543	0.882884	0.887213
aha_cm	0.988506	0.998776	1.00282	1.00618	1.00951	1.00695	1.01819	1.02844	1.02636	1.03402	1.03555	1.03496	1.03108	1.02164	1.00909	0.997213	0.985272	0.969339	0.95639	0.94488	0.938503	0.927222	0.918974	0.917803	0.9088	0.907156	0.903837	0.899632	0.901724	0.900594	0.899532	0.903671	0.902203	0.899388	0.897067	0.898185	0.901923	0.90049	0.906907	0.904106	0.901242
aha_cm	0.983556	0.987611	0.987671	0.994385	0.976619	0.99485	1.01122	1.01397	1.02422	1.03182	1.03372	1.03737	1.04271	1.048	1.04835	1.04906	1.03976	1.0314	1.01281	0.993847	0.98824	0.976446	0.966276	0.950808	0.942679	0.929414	0.932271	0.919044	0.910549	0.909487	0.898679	0.890069	0.882383	0.88588	0.881822	0.877739	0.872939	0.871232	0.872676	0.870103	0.871651
aha_cm	0.985811	0.995395	0.998969	1.00593	1.00734	1.01641	1.02129	1.02369	1.02816	1.03348	1.04123	1.03766	1.03799	1.04254	1.04532	1.04071	1.03134	1.02001	1.00381	0.989726	0.978463	0.969421	0.957763	0.946786	0.93551	0.926184	0.920947	0.912972	0.906429	0.901921	0.896192	0.891312	0.88731	0.885683	0.882842	0.881309	0.877846	0.884171	0.880718	0.879482	0.88665
aha_cm	0.983712	0.985819	1.00182	1.00331	1.00583	1.01389	1.01764	1.01828	1.01828	1.02764	1.03246	1.03432	1.04265	1.04909	1.06005	1.05591	1.05541	1.04955	1.04004	1.02747	1.01551	1.00239	0.985414	0.969863	0.960045	0.948452	0.938674	0.931014	0.926241	0.918111	0.910361	0.907309	0.903157	0.892575	0.888934	0.883772	0.880905	0.878395	0.875448	0.879127	0.8762
aha_cm	0.990779	0.999237	0.996387	1.0071	1.01305	1.01414	1.0221	1.02575	1.02616	1.02732	1.03331	1.03973	1.05187	1.05741	1.05754	1.05386	1.05123	1.05132	1.03605	1.02358	1.01022	0.994337	0.97962	0.967901	0.964029	0.954466	0.944914	0.933866	0.926268	0.916205	0.907674	0.909671	0.902094	0.894893	0.890664	0.879455	0.883448	0.879853	0.87874	0.875982	0.87708
aha_cm	1.00662	1.0162	1.01794	1.02231	1.02537	1.03258	1.04578	1.05779	1.05691	1.06906	1.07003	1.07073	1.08015	1.08444	1.0826	1.08489	1.09121	1.08819	1.08117	1.07029	1.06721	1.05514	1.034	1.02036	1.00498	0.985519	0.975316	0.970721	0.95891	0.94816	0.938504	0.930728	0.915456	0.908051	0.901635	0.890313	0.887577	0.875643	0.87866	0.87252	0.869356
aha_cm	0.996929	1.00462	1.00583	1.01124	1.01403	1.01846	1.02442	1.03136	1.02832	1.03628	1.04106	1.04719	1.05828	1.06448	1.07306	1.08688	1.10349	1.11112	1.10606	1.09236	1.0755	1.06304	1.03339	1.02027	0.997248	0.981784	0.965524	0.951137	0.932373	0.929171	0.922875	0.913653	0.908079	0.899932	0.895623	0.893056	0.88632	0.887971	0.873533	0.870309	0.863943
aha_cm	0.965322	0.971363	0.972022	0.97891	0.986691	0.987238	0.99103	0.993875	0.999946	1.00632	1.01151	1.0162	1.01883	1.01616	1.01409	1.00353	0.988094	0.979622	0.959563	0.940847	0.92587	0.918231	0.904826	0.895702	0.890489	0.87934	0.878182	0.878207	0.87732	0.876457	0.874963	0.870259	0.867201	0.86973	0.868435	0.871173	0.870268	0.868217	0.873897	0.874245	0.871668
aha_cm	0.987883	0.986363	0.994529	1.00291	1.01369	1.00966	1.01321	1.02207	1.03029	1.03718	1.0431	1.04925	1.05823	1.06189	1.06036	1.05082	1.0397	1.03826	1.02548	1.0042	0.988957	0.981162	0.969126	0.954147	0.946825	0.929588	0.923776	0.91606	0.90415	0.901159	0.894724	0.887386	0.881655	0.87882	0.868418	0.871762	0.867033	0.864772	0.867917	0.86426	0.85751
aha_cm	0.992926	1.00149	1.00818	1.01275	1.01872	1.02448	1.02998	1.03937	1.03938	1.03728	1.05778	1.06581	1.07281	1.07747	1.08669	1.08473	1.09867	1.09765	1.08984	1.08107	1.06686	1.05538	1.03507	1.01271	0.9952	0.98241	0.96932	0.960778	0.951169	0.943358	0.936137	0.930681	0.917547	0.916558	0.910135	0.902051	0.902501	0.895881	0.894979	0.888727	0.881948
aha_cm	0.991435	1.00306	1.00486	1.0102	1.00708	1.01644	1.01974	1.02463	1.02891	1.03357	1.04083	1.05159	1.06118	1.06275	1.06382	1.05645	1.026	1.01251	0.998593	0.985597	0.974028	0.969262	0.962884	0.954288	0.935239	0.928896	0.922857	0.916524	0.910421	0.89811	0.900948	0.894193	0.892076	0.891016	0.885412	0.890794	0.887951	0.884297	0.891761	0.893463	0.897418
aha_cm	0.953969	0.955154	0.95767	0.964766	0.973058	0.973329	0.97897	0.99025	0.997537	1.01084	1.01958	1.01675	1.01341	1.00523	0.990182	0.975682	0.96417	0.952894	0.936683	0.924392	0.919329	0.910648	0.901946	0.897451	0.897071	0.896203	0.889219	0.88441	0.880602	0.881801	0.877405	0.876408	0.878928	0.878339	0.877843	0.882938	0.882995	0.885547	0.889291	0.881716	0.888808
aha_cm	0.958647	0.961244	0.961647	0.964512	0.969156	0.979895	0.981982	0.98766	0.985759	0.977257	1.00011	1.00968	1.01205	1.01448	1.01759	1.01798	1.01662	1.00381	0.993947	0.974495	0.958091	0.944355	0.932317	0.923751	0.917605	0.906268	0.902014	0.895459	0.894617	0.887445	0.881567	0.877701	0.870458	0.865763	0.863663	0.863665	0.858349	0.860214	0.853811	0.853267	0.853789
pp2c_cm	1.03719	1.04033	1.0529	1.06114	1.0654	1.07486	1.08001	1.08422	1.09432	1.09605	1.10107	1.10708	1.11489	1.12238	1.12914	1.13888	1.14487	1.14764	1.14814	1.13387	1.11404	1.09439	1.07258	1.05566	1.02719	1.00451	0.989799	0.965617	0.951027	0.93731	0.924052	0.912531	0.907618	0.895749	0.884208	0.877322	0.871606	0.864779	0.852951	0.846698	0.844982
pp2c_cm	1.06133	1.06842	1.07238	1.08034	1.08976	1.10403	1.11403	1.12123	1.12139	1.13076	1.12153	1.1202	1.12762	1.1435	1.1614	1.18966	1.1938	1.20726	1.21372	1.21116	1.21282	1.20468	1.18106	1.14848	1.11651	1.09204	1.06295	1.04493	1.0189	1.00078	0.987277	0.973698	0.962484	0.947184	0.936961	0.926946	0.918205	0.911851	0.907186	0.908019	0.898887
pp2c_cm	1.00363	1.00895	1.01079	1.01452	1.02162	1.02871	1.03745	1.04456	1.04408	1.04635	1.03587	1.04345	1.0638	1.06806	1.08094	1.08975	1.10728	1.11349	1.11886	1.11158	1.10344	1.08491	1.06189	1.03677	1.0148	0.985332	0.96872	0.954198	0.940552	0.930066	0.917307	0.902058	0.893102	0.885024	0.877592	0.867082	0.856998	0.852714	0.85358	0.850678	0.842666
pp2c_cm	1.04572	1.05234	1.06635	1.08106	1.08208	1.096	1.09613	1.10327	1.10702	1.10934	1.11261	1.11744	1.13813	1.14242	1.15247	1.17014	1.17763	1.18325	1.18941	1.17344	1.15996	1.13789	1.11833	1.097	1.0661	1.03872	1.01738	1.00205	0.983537	0.971182	0.960187	0.949084	0.946224	0.938777	0.931894	0.922083	0.918986	0.904874	0.900257	0.899922	0.890849
pp2c_cm	1.00969	1.01313	1.01547	1.01887	1.02155	1.02444	1.0305	1.03334	1.03726	1.04281	1.04375	1.05041	1.05171	1.06137	1.06503	1.07476	1.08924	1.08935	1.09415	1.09628	1.08652	1.07624	1.06571	1.04548	1.0293	1.00965	0.994109	0.973667	0.95792	0.947655	0.931909	0.924256	0.916495	0.908639	0.903069	0.891519	0.885158	0.876545	0.878191	0.872539	0.862249
pp2c_cm	0.927456	0.927778	0.927598	0.925383	0.924511	0.923155	0.926576	0.933386	0.926093	0.922843	0.932529	0.940857	0.942371	0.950677	0.953489	0.956884	0.965755	0.972113	0.97879	0.981175	0.983118	0.978186	0.979681	0.96951	0.954577	0.945746	0.934541	0.914862	0.896028	0.88534	0.877601	0.873621	0.85937	0.855283	0.850488	0.841256	0.835194	0.828778	0.821702	0.818588	0.815308
pp2c_cm	0.931742	0.927483	0.930684	0.930872	0.929325	0.931445	0.934802	0.931039	0.938924	0.93879	0.93503	0.936561	0.937842	0.934885	0.935435	0.936958	0.930656	0.92978	0.936263	0.937288	0.935289	0.925989	0.919645	0.919841	0.911614	0.907763	0.899885	0.889274	0.884873	0.875174	0.869385	0.864994	0.862418	0.856645	0.853361	0.850099	0.844941	0.836942	0.830803	0.82365	0.819944
pp2c_cm	0.899903	0.900864	0.903743	0.898933	0.897975	0.895121	0.896671	0.888441	0.89042	0.891056	0.897415	0.899734	0.900962	0.905235	0.902823	0.908901	0.908144	0.915071	0.918565	0.913416	0.916866	0.917128	0.915688	0.917871	0.917161	0.90907	0.898087	0.89364	0.884913	0.878126	0.870467	0.864977	0.863592	0.852913	0.845144	0.840834	0.836839	0.830362	0.830047	0.826792	0.822914
pp2c_cm	0.948337	0.948918	0.947414	0.946242	0.947388	0.952004	0.960207	0.954422	0.958382	0.960406	0.961721	0.968332	0.974009	0.983138	0.990607	0.987018	1.00042	1.01302	1.01867	1.02306	1.03155	1.02915	1.03332	1.0324	1.02141	1.0024	0.990536	0.967788	0.959565	0.958374	0.946442	0.926241	0.900678	0.906139	0.906376	0.894414	0.879954	0.864163	0.86528	0.855856	0.852883
pp2c_cm	0.981339	0.982662	0.989256	0.983692	0.991718	0.997032	0.999013	1.00892	1.00674	1.01174	1.01442	1.02478	1.03178	1.03906	1.04105	1.04092	1.0485	1.05556	1.05961	1.06321	1.06142	1.05182	1.033	1.02172	1.00111	0.986564	0.976197	0.962129	0.945253	0.928612	0.925222	0.915743	0.903856	0.890677	0.880276	0.871953	0.868218	0.859791	0.854138	0.846212	0.832099
pp2c_cm	0.938896	0.934857	0.932265	0.932973	0.931546	0.935583	0.932783	0.93106	0.936047	0.939458	0.943439	0.952916	0.963163	0.963416	0.967853	0.975358	0.983567	0.985923	0.994511	0.998501	1.00389	1.00354	0.999829	0.98696	0.979653	0.97814	0.961469	0.95128	0.941829	0.922339	0.908296	0.892931	0.880967	0.878723	0.866109	0.857796	0.847565	0.838526	0.829898	0.827919	0.824658
pp2c_cm	0.950258	0.949344	0.954118	0.952392	0.955311	0.951464	0.950701	0.954678	0.953966	0.965506	0.963168	0.96428	0.962705	0.958625	0.946077	0.935729	0.938771	0.931915	0.921595	0.909196	0.905691	0.904429	0.898749	0.882489	0.873917	0.869983	0.862025	0.860037	0.856104	0.853393	0.844871	0.8409	0.842587	0.838131	0.832496	0.829809	0.826148	0.827634	0.826291	0.826225	0.828228
pp2c_cm	0.956661	0.959772	0.957177	0.96111	0.956454	0.952833	0.960555	0.959981	0.963559	0.962713	0.965276	0.965429	0.973294	0.978837	0.988062	0.992861	0.996224	1.01074	1.01496	1.01768	1.01873	1.0186	1.01212	1.00051	0.991119	0.975285	0.959545	0.943655	0.930059	0.918078	0.909771	0.90062	0.890585	0.891329	0.882257	0.871852	0.872369	0.861018	0.85799	0.854419	0.847155
pp2c_cm	0.958399	0.96416	0.966787	0.967239	0.968873	0.967517	0.950864	0.945787	0.952282	0.956084	0.975766	0.98371	0.989863	0.993158	0.986936	0.985951	0.98788	0.989645	0.978223	0.983259	0.979165	0.978441	0.969121	0.951379	0.929626	0.913427	0.892871	0.879483	0.869734	0.867069	0.857946	0.849298	0.84819	0.831522	0.824597
pp2c_cm	0.997526	1.00536	1.01499	1.02029	1.02601	1.03499	1.04621	1.04968	1.05022	1.04908	1.04637	1.05606	1.05757	1.06146	1.06294	1.06504	1.08735	1.10317	1.11741	1.11773	1.10859	1.09756	1.09657	1.06207	1.03835	1.02408	1.00499	0.985094	0.973489	0.960633	0.950846	0.947032	0.933749	0.922702	0.914778	0.911797	0.907474	0.901153	0.89631	0.889226	0.879877
pp2c_cm	0.968134	0.974345	0.980608	0.993192	1.0085	1.02015	1.03086	1.03355	1.03355	1.03361	1.03035	1.03979	1.05349	1.06281	1.06836	1.0834	1.08922	1.09927	1.10168	1.10371	1.10138	1.09658	1.07511	1.06256	1.04876	1.03115	1.00403	0.984847	0.977881	0.954085	0.942399	0.928689	0.916852	0.905995	0.889062	0.880607	0.874484	0.872062	0.860421	0.851807	0.84158
pp2c_cm	0.91294	0.919397	0.924722	0.925349	0.929051	0.932755	0.935292	0.93781	0.93845	0.941064	0.943855	0.949845	0.936657	0.952922	0.96147	0.964612	0.977755	0.979485	0.986763	0.998483	1.0041	1.00291	1.00337	1.00862	1.00663	0.999575	0.98738	0.976326	0.968355	0.959675	0.943063	0.929133	0.914543	0.896368	0.886025	0.876944	0.865512	0.854544	0.846	0.839525	0.840012
pp2c_cm	0.934962	0.936002	0.941603	0.947659	0.953469	0.95806	0.963924	0.97075	0.970544	0.977742	0.981867	0.984767	0.999926	1.00902	1.01088	1.01902	1.03025	1.03529	1.04417	1.04984	1.04909	1.04866	1.04136	1.03652	1.02539	1.01505	0.996267	0.979171	0.969344	0.958127	0.942713	0.934896	0.927831	0.922773	0.916255	0.906689	0.907075	0.896742	0.887935	0.880987	0.878972
pp2c_cm	0.949579	0.952045	0.95997	0.96471	0.970015	0.972369	0.980204	0.989684	1.00297	1.00222	0.992924	0.991087	0.997067	1.00796	1.02478	1.037	1.05211	1.06557	1.08452	1.09671	1.10641	1.10949	1.11609	1.10638	1.09268	1.08009	1.06091	1.04509	1.02294	1.0062	0.988212	0.971845	0.959152	0.942346	0.92969	0.916234	0.904282	0.888126	0.880303	0.866626	0.856826
pp2c_cm	0.974923	0.985177	0.990574	1.00294	1.01901	1.02208	1.03414	1.0382	1.05221	1.05463	1.05403	1.05706	1.06458	1.06655	1.06961	1.06913	1.10653	1.10884	1.10402	1.10486	1.10034	1.09921	1.08566	1.0647	1.04905	1.02754	1.01059	0.994811	0.977602	0.965973	0.946199	0.935235	0.921898	0.917335	0.902051	0.893475	0.880174	0.871758	0.862247	0.861152	0.85744
pp2c_cm	0.937619	0.945953	0.941518	0.946381	0.957836	0.96974	0.967981	0.967681	0.966214	0.968066	0.956686	0.96076	0.970113	0.977021	0.987742	0.99202	1.00172	0.997137	1.0012	1.0031	1.01386	1.01392	1.00169	0.987542	0.971953	0.958296	0.92931	0.912405	0.919208	0.909576	0.897119	0.884327	0.874801	0.876824	0.872176	0.870131	0.86496	0.855023	0.846632	0.843526	0.84451
pp2c_cm	0.920989	0.929195	0.93196	0.930777	0.928402	0.93287	0.942408	0.938467	0.937104	0.9459	0.943543	0.94711	0.947993	0.955916	0.961839	0.97103	0.982236	0.987	0.991353	0.989389	0.994965	0.990036	0.974199	0.963165	0.94968	0.932298	0.919603	0.909233	0.901213	0.892397	0.884562	0.875225	0.869639	0.872279	0.868652	0.865359	0.866468	0.862726	0.862705	0.860498	0.855056
pp2c_cm	0.962076	0.965528	0.972574	0.982087	0.986068	0.987699	0.994033	1.00469	1.00392	1.01998	1.02234	1.02097	1.02909	1.03332	1.04014	1.05932	1.06772	1.07646	1.08545	1.09709	1.11137	1.12169	1.12418	1.11227	1.10939	1.09534	1.07619	1.05386	1.03348	1.01165	0.998978	0.97707	0.963825	0.953056	0.939835	0.921045	0.909693	0.895821	0.886586	0.878511	0.868791
pp2c_cm	0.961984	0.972602	0.973848	0.980018	0.982717	0.992831	1.00161	1.00241	1.02767	1.02794	1.03474	1.03922	1.03787	1.03927	1.04436	1.04802	1.0598	1.0699	1.08059	1.09148	1.10248	1.10315	1.10329	1.09029	1.08232	1.06763	1.04884	1.02927	1.00902	0.986528	0.963323	0.946064	0.921159	0.902247	0.886516	0.871987	0.856448	0.842176	0.833944	0.820274	0.816626
pp2c_cm	0.974187	0.980979	0.996427	0.999166	1.01744	1.02205	1.02765	1.03199	1.03301	1.03186	1.03237	1.03552	1.03928	1.01568	1.01756	1.02842	1.05542	1.06192	1.06977	1.06333	1.06962	1.06659	1.0633	1.0494	1.03389	1.01657	0.993128	0.973579	0.951773	0.933965	0.918174	0.910207	0.896299	0.878617	0.870146	0.861878	0.855473	0.852169	0.84682	0.840823	0.837786
pp2c_cm	0.985201	0.993936	0.995543	1.0039	1.01265	1.00816	1.00391	1.00469	0.994916	1.00102	1.00989	1.02888	1.03572	1.03644	1.04392	1.05408	1.05877	1.05894	1.05576	1.05713	1.04851	1.04779	1.03834	1.0286	1.01436	1.00602	0.991552	0.974595	0.966071	0.955909	0.936951	0.92323	0.912141	0.903837	0.894909	0.886138	0.880517	0.877168	0.865353	0.865772	0.85883
pp2c_cm	1.00831	1.01632	1.02556	1.03186	1.04612	1.05342	1.06632	1.06809	1.06866	1.08282	1.08273	1.07415	1.06695	1.08781	1.09262	1.1031	1.10211	1.09547	1.08666	1.08415	1.07363	1.05724	1.0498	1.03249	1.0212	1.00722	0.989814	0.980758	0.969384	0.959935	0.946645	0.936415	0.925689	0.916792	0.909911	0.903049	0.895121	0.884842	0.879134	0.874473	0.873085
pp2c_cm	0.973537	0.974226	0.979725	0.98697	0.985711	0.988899	0.994524	0.993164	1.0171	1.03297	1.04016	1.04937	1.05512	1.06012	1.07366	1.08493	1.09624	1.10382	1.11791	1.12322	1.11913	1.1218	1.11328	1.09839	1.08563	1.057	1.0389	1.0276	1.00801	0.989949	0.977867	0.967679	0.953422	0.942082	0.925648	0.914475	0.904535	0.897252	0.888677	0.881498	0.882743
pp2c_cm	0.957955	0.960921	0.957544	0.960257	0.962669	0.964012	0.971545	0.97274	0.974867	0.976085	0.978972	0.98669	0.99477	1.00457	1.01128	1.01934	1.03087	1.03521	1.04411	1.05685	1.05835	1.06249	1.0539	1.04525	1.03214	1.02002	1.00356	0.988407	0.964375	0.952077	0.937816	0.926214	0.913258	0.903883	0.90048	0.888445	0.884593	0.874107	0.868288	0.863665	0.858755
pp2c_cm	0.971467	0.973758	0.974105	0.983734	0.989603	1.00041	1.01562	1.02248	1.03117	1.03157	1.03213	1.03047	1.03511	1.04798	1.05459	1.06249	1.07235	1.07987	1.08967	1.09231	1.09481	1.0948	1.08795	1.07913	1.06705	1.04842	1.02985	1.01247	0.998025	0.97712	0.958858	0.941659	0.926877	0.908729	0.904201	0.89518	0.882997	0.875404	0.867027	0.862891	0.858665
pp2c_cm	0.97965	0.974915	0.98276	0.985703	0.988352	0.994063	0.995475	1.0032	1.00915	1.01221	1.01729	1.01658	1.01754	1.02662	1.03806	1.04577	1.05368	1.05908	1.07027	1.08501	1.09198	1.09069	1.07671	1.09419	1.08771	1.07882	1.05504	1.03965	1.034	1.01046	0.992415	0.979209	0.968942	0.954111	0.944522	0.935757	0.925301	0.914481	0.904586	0.896319	0.889988
pp2c_cm	0.948534	0.954027	0.959045	0.961443	0.959995	0.969952	0.967685	0.973107	0.991455	1.00387	1.00725	1.00829	1.00617	1.00656	1.01658	1.01944	1.02306	1.02689	1.0335	1.03652	1.04475	1.04376	1.04524	1.04943	1.04361	1.03968	1.02292	1.02682	1.00894	0.990089	0.977053	0.959138	0.946727	0.935004	0.920962	0.907428	0.898566	0.888507	0.874658	0.867001	0.857049
pp2c_cm	0.959343	0.964784	0.966888	0.969139	0.971103	0.979865	0.979946	0.978696	0.979686	0.981876	0.98242	0.987659	0.990393	0.997607	1.00428	1.00357	1.00724	1.02315	1.02723	1.03208	1.03564	1.03633	1.03347	1.02602	1.02237	1.00634	0.996976	1.00186	1.00458	0.992996	0.977092	0.962904	0.951403	0.93927	0.932247	0.91821	0.905426	0.890065	0.878555	0.869337	0.862452
pp2c_cm	0.911509	0.918495	0.923849	0.924067	0.927143	0.930185	0.939066	0.942002	0.941967	0.941833	0.945557	0.945412	0.95232	0.960662	0.96565	0.977703	0.979309	0.988021	0.989122	0.991348	1.00092	1.00389	1.00582	0.991704	0.989952	0.977313	0.95618	0.93942	0.926048	0.918061	0.901599	0.890226	0.880396	0.868507	0.854251	0.846764	0.833406	0.828284	0.823978	0.819605	0.810376
pp2c_cm	0.940975	0.94662	0.963913	0.971187	0.972943	0.978003	0.9855	0.984772	0.983153	0.978153	0.981797	0.979592	0.98758	0.993398	1.00128	1.02163	1.02085	1.02496	1.02537	1.03815	1.03658	1.02918	1.02634	1.05337	1.02845	1.01394	1.02096	1.01222	0.993375	0.981773	0.978965	0.963291	0.950412	0.939428	0.921028	0.882537	0.879246	0.884033	0.874552	0.870687	0.86463
pp2c_cm	0.97843	0.987781	0.990594	0.988523	0.992427	0.9906	0.994836	1.00566	1.0197	1.02346	1.02455	1.0222	1.03176	1.03211	1.03836	1.03895	1.03402	1.03116	1.02291	1.01528	1.0277	1.02417	1.04899	1.04543	1.01044	1.00772	1.00689	0.984074	0.975256	0.946535	0.919726	0.922504	0.927661	0.92127	0.885673	0.885779	0.87979	0.87922	0.875492	0.869974	0.868542
pp2c_cm	0.936614	0.933125	0.935866	0.93543	0.938591	0.942825	0.937819	0.934289	0.937668	0.93946	0.941613	0.943415	0.946259	0.945352	0.955406	0.959701	0.967394	0.974157	0.978989	0.987066	0.996101	0.997677	0.996688	1.00049	0.985535	0.973574	0.961488	0.944827	0.93065	0.919015	0.903363	0.893745	0.891792	0.875907	0.865837	0.86023	0.849786	0.836197	0.831091	0.82366	0.822647
pp2c_cm	0.97832	0.985168	0.982064	0.982821	0.992093	0.993827	0.999867	0.999154	1.00481	1.00752	1.0077	1.00959	1.01137	1.01496	1.02756	1.03152	1.03635	1.04566	1.05218	1.0614	1.06329	1.05795	1.05651	1.04472	1.03122	1.01125	0.995952	0.983521	0.965589	0.951956	0.93929	0.930554	0.919223	0.913437	0.898859	0.891053	0.881283	0.874552	0.866761	0.870405	0.86591
pp2c_cm	0.961171	0.961601	0.963795	0.964647	0.973326	0.977295	0.975868	0.976162	0.976504	0.970341	0.958435	0.961082	0.963436	0.977127	0.988712	0.993328	0.999865	1.00457	1.0129	1.01893	1.01951	1.01365	1.00504	0.993745	0.984101	0.972654	0.959218	0.950134	0.940019	0.920426	0.906872	0.898033	0.886963	0.881778	0.876113	0.871758	0.865581	0.858268	0.855001	0.851207	0.850443
col_iaa	1.05725	1.06577	1.07139	1.07778	1.08971	1.09261	1.08924	1.09805	1.10901	1.10819	1.11895	1.12654	1.13469	1.14042	1.15404	1.15088	1.16829	1.17333	1.17416	1.17526	1.15733	1.14516	1.13786	1.12129	1.09558	1.07739	1.06105	1.04638	1.0339	1.02646	1.02213	1.01456	1.00921	1.00144	0.994383	0.982937	0.981436	0.972743	0.965397	0.961313	0.954372
col_iaa	1.06659	1.07216	1.07727	1.08248	1.08655	1.10132	1.10999	1.12118	1.12674	1.13199	1.13319	1.14402	1.15343	1.16797	1.19019	1.2031	1.22196	1.24455	1.25792	1.26204	1.2521	1.22702	1.21462	1.19328	1.17083	1.15003	1.12942	1.10882	1.09977	1.08205	1.07177	1.05466	1.04376	1.03598	1.01884	1.00143	0.994103	0.985638	0.979938	0.970755	0.962884
col_iaa	1.07024	1.08064	1.0919	1.09403	1.10593	1.11801	1.12609	1.13734	1.1419	1.14257	1.14354	1.14582	1.14802	1.15387	1.15178	1.16232	1.18257	1.21258	1.22417	1.23553	1.24257	1.25742	1.26044	1.24966	1.23748	1.22105	1.2096	1.17896	1.16147	1.13957	1.11811	1.10264	1.09542	1.07404	1.06586	1.05086	1.04067	1.02996	1.01935	1.0145	1.01277
col_iaa	1.0306	1.0375	1.03603	1.04679	1.05271	1.0582	1.06639	1.07545	1.07327	1.07869	1.08	1.09211	1.09914	1.11243	1.12482	1.1381	1.15665	1.1707	1.18346	1.19247	1.19225	1.19529	1.18943	1.17688	1.16423	1.14335	1.11818	1.10099	1.09169	1.07542	1.06909	1.06193	1.04999	1.04628	1.03816	1.0296	1.02525	1.03047	1.0146	1.00845	1.00119
col_iaa	1.05778	1.07324	1.07118	1.07377	1.08592	1.09194	1.09722	1.10361	1.11771	1.11714	1.12148	1.13203	1.13439	1.15507	1.14919	1.10203	1.09446	1.09428	1.10233	1.12523	1.1408	1.14166	1.1317	1.12439	1.12369	1.14586	1.12924	1.09453	1.08337	1.07603	1.05925	1.04554	1.03061	1.01716	1.01431	1.00399	0.991892	0.988638	0.98282	0.97268	0.966608
col_iaa	1.09735	1.0999	1.10384	1.11108	1.11884	1.12755	1.13491	1.13805	1.14343	1.14141	1.13405	1.1359	1.134	1.15166	1.17099	1.18096	1.18054	1.17738	1.18711	1.18974	1.21169	1.22509	1.20838	1.18631	1.16863	1.15155	1.13332	1.12189	1.10146	1.08496	1.07099	1.06363	1.05541	1.04804	1.04053	1.02639	1.0138	1.00307	0.998171	0.998979	0.988267
col_iaa	1.03468	1.04616	1.05987	1.06926	1.08143	1.09224	1.07157	1.09429	1.14534	1.16789	1.18119	1.17382	1.14942	1.14766	1.14838	1.13648	1.12391	1.10037	1.07649	1.03981	1.00751	0.978155	0.955681	0.932935	0.909897	0.893414	0.881366	0.871375	0.862012	0.855856	0.850854	0.84962	0.854438	0.853976	0.850636	0.848839	0.846473	0.850671	0.849522	0.853067	0.856119
col_iaa	1.03353	1.04496	1.05453	1.06681	1.07583	1.08951	1.09978	1.1068	1.12044	1.12422	1.12659	1.13427	1.14372	1.15783	1.16195	1.18092	1.18882	1.20569	1.21249	1.20071	1.18182	1.15112	1.13679	1.12552	1.10363	1.07646	1.05916	1.035	1.02219	1.00179	0.984956	0.976497	0.962008	0.947213	0.934622	0.930592	0.920769	0.912392	0.89816	0.888581	0.883152
col_iaa	1.02807	1.03992	1.04909	1.06111	1.0639	1.07035	1.06344	1.05499	1.05874	1.05306	1.05314	1.04993	1.04523	1.03618	1.02611	1.00488	0.993536	0.979682	0.966154	0.949936	0.945148	0.933871	0.924273	0.92127	0.911607	0.90917	0.900509	0.896983	0.891482	0.885451	0.887109	0.890166	0.884397	0.881387	0.881818	0.879713	0.880445	0.883155	0.883722	0.887462
col_iaa	0.968718	0.972327	0.974405	0.979479	0.985086	0.98995	0.997438	0.993134	1.00496	1.00969	1.01409	1.0276	1.03169	1.0521	1.06756	1.07984	1.0874	1.08836	1.08349	1.07817	1.0664	1.04668	1.03187	1.02149	1.00204	0.987466	0.970805	0.949463	0.933654	0.91745	0.901882	0.891723	0.882068	0.874252	0.86843	0.861989	0.852785	0.845394	0.837823	0.833185	0.824978
col_iaa	0.997246	1.00482	1.01433	1.02345	1.02716	1.02934	1.01579	1.01823	1.0242	1.03816	1.05128	1.05667	1.06126	1.06334	1.06655	1.07498	1.0819	1.07322	1.07117	1.05716	1.04405	1.02988	1.0147	0.992428	0.974758	0.963327	0.953672	0.944016	0.934223	0.919522	0.91267	0.908888	0.892462	0.886902	0.88126	0.87126	0.863854	0.848679	0.844175	0.842623	0.835696
col_iaa	1.08269	1.08213	1.09215	1.11094	1.13513	1.14967	1.16996	1.18423	1.18265	1.19819	1.20458	1.18908	1.17129	1.16287	1.15417	1.13766	1.11438	1.08959	1.05871	1.03433	1.02161	1.00369	0.9948	0.986691	0.971965	0.963485	0.961094	0.95029	0.938484	0.934513	0.92501	0.917605	0.924767	0.90875	0.907794	0.907654	0.905416	0.901958	0.904281	0.898107	0.879071
col_iaa	1.04192	1.03992	1.04868	1.059	1.06745	1.07581	1.07727	1.09715	1.11241	1.12439	1.13563	1.14837	1.16484	1.17415	1.20088	1.21079	1.22476	1.22494	1.23505	1.23401	1.22205	1.21263	1.18656	1.17298	1.15445	1.13584	1.11034	1.09157	1.07615	1.06526	1.0532	1.03806	1.01907	1.01094	0.996481	0.996719	0.985778	0.977069	0.972127	0.961283	0.960424
col_iaa	1.02891	1.04257	1.05609	1.07764	1.09204	1.10941	1.12276	1.1401	1.15384	1.16155	1.17155	1.17791	1.18404	1.19267	1.18939	1.18422	1.17347	1.16263	1.14429	1.12194	1.09557	1.07326	1.05403	1.03753	1.02163	1.00163	0.992815	0.979482	0.971394	0.964958	0.961346	0.95504	0.950439	0.943105	0.940238	0.929884	0.931156	0.922704	0.909595	0.916973	0.914846
col_iaa	1.01867	1.03424	1.02447	1.03022	1.04459	1.04924	1.05685	1.07118	1.10711	1.14352	1.17509	1.17368	1.19923	1.20175	1.17191	1.1457	1.13628	1.11102	1.08089	1.06424	1.0491	1.0277	1.0157	1.02882	1.04128	1.02283	1.00616	0.992164	0.982892	0.975897	0.962732	0.953442	0.94604	0.93918	0.934816	0.923422	0.91763	0.919162	0.919337	0.911402	0.90627
col_iaa	1.00605	1.01681	1.02502	1.02084	1.01307	1.02282	1.03507	1.05322	1.06712	1.07251	1.08641	1.09596	1.10679	1.12474	1.13843	1.15446	1.16499	1.16925	1.16903	1.1632	1.15775	1.14173	1.12007	1.09063	1.07917	1.06315	1.04464	1.02474	1.01104	0.99451	0.98224	0.975568	0.971112	0.964136	0.950342	0.948489	0.935581	0.942383	0.933721	0.927039	0.925917
col_iaa	1.05852	1.06366	1.07289	1.0891	1.10318	1.11057	1.11328	1.1256	1.12276	1.12026	1.1363	1.14831	1.16362	1.18055	1.19595	1.1991	1.2011	1.20599	1.19387	1.18623	1.17214	1.15457	1.1358	1.11496	1.10504	1.08725	1.07166	1.06694	1.0545	1.04828	1.03394	1.02523	1.01715	1.00572	0.998351	0.992597	0.98594	0.974696	0.972498	0.961305	0.95351
col_iaa	1.03998	1.05461	1.06618	1.07547	1.09169	1.10069	1.11132	1.1124	1.10574	1.11011	1.11607	1.13203	1.18271	1.19839	1.22081	1.24726	1.26289	1.27167	1.27657	1.27761	1.26967	1.24707	1.22749	1.21169	1.18904	1.17813	1.16166	1.14357	1.12735	1.11848	1.10115	1.08995	1.07974	1.07065	1.05902	1.05199	1.04889	1.03454	1.0257	1.02334	1.01493
col_iaa	1.05024	1.0557	1.05522	1.06193	1.08097	1.09055	1.11667	1.12548	1.13602	1.1342	1.14058	1.14967	1.15506	1.17119	1.18647	1.19833	1.2165	1.22613	1.23027	1.2302	1.21482	1.1928	1.16571	1.14641	1.13107	1.10965	1.08966	1.07057	1.05051	1.03964	1.01842	1.00921	0.998396	0.987899	0.977056	0.97535	0.96744	0.968095	0.959004	0.959549	0.960591
col_iaa	1.03456	1.05166	1.0626	1.07227	1.08733	1.10088	1.1085	1.1026	1.11669	1.13587	1.13977	1.13741	1.15522	1.15763	1.17519	1.18222	1.19319	1.20475	1.22594	1.21928	1.20469	1.19081	1.18062	1.16008	1.13926	1.12689	1.10942	1.08811	1.06832	1.04926	1.03454	1.01994	1.00383	0.992931	0.982167	0.967695	0.970166	0.959338	0.95428	0.952149	0.95155
col_iaa	0.993835	1.00763	1.01898	1.01905	1.02837	1.02931	1.04309	1.05831	1.07401	1.09251	1.11319	1.1294	1.14517	1.14937	1.15887	1.15234	1.14998	1.14283	1.13015	1.11168	1.09056	1.08142	1.06214	1.04698	1.04317	1.03164	1.013	1.00964	0.995638	0.981247	0.972645	0.969618	0.961959	0.956384	0.949279	0.947866	0.947048	0.935163	0.937232	0.932971	0.928424
col_iaa	1.0191	1.02339	1.02577	1.02926	1.03501	1.04394	1.05516	1.06568	1.0724	1.07286	1.08168	1.09881	1.11199	1.12227	1.13962	1.16495	1.17583	1.19213	1.20063	1.21643	1.21567	1.2054	1.19027	1.17523	1.15059	1.12963	1.10964	1.09012	1.07762	1.06268	1.05269	1.03858	1.03312	1.02884	1.02107	1.01491	1.00911	1.0043	1.00176	1.00086	0.994553
col_iaa	1.00693	1.00735	1.01598	1.0182	1.02319	1.02904	1.04002	1.04854	1.05002	1.06013	1.0672	1.06616	1.08055	1.09347	1.09949	1.11876	1.13119	1.13028	1.13061	1.12757	1.12058	1.10607	1.08604	1.06168	1.03856	1.02228	0.999976	0.990015	0.982778	0.966765	0.962225	0.95411	0.945867	0.945305	0.935259	0.931594	0.92639	0.921341	0.915335	0.9152	0.909333
col_iaa	1.00619	1.01903	1.02394	1.023	1.03361	1.03821	1.04643	1.05983	1.07321	1.06992	1.07487	1.08272	1.09965	1.10725	1.11674	1.1302	1.1458	1.15571	1.1514	1.13937	1.13022	1.12248	1.10509	1.09018	1.07059	1.051	1.03478	1.02504	1.01634	1.01512	1.00356	0.993805	0.991276	0.981559	0.97244	0.972095	0.964865	0.955901	0.949789	0.941297	0.938814
col_iaa	1.02263	1.0311	1.03153	1.04043	1.04905	1.05096	1.05904	1.06235	1.07397	1.08529	1.09493	1.11059	1.11995	1.13112	1.14038	1.14162	1.15471	1.1501	1.14613	1.13763	1.12463	1.10981	1.08741	1.06699	1.05646	1.03771	1.02254	1.01701	1.00329	0.996676	0.989359	0.980898	0.968904	0.969844	0.963414	0.955105	0.952355	0.948871	0.941096	0.927923	0.929734
aha_iaa	1.00077	1.00013	1.00915	1.01227	1.01467	1.011	1.02323	1.02595	1.03486	1.05529	1.05621	1.06128	1.07069	1.08057	1.08143	1.08653	1.08967	1.08623	1.08294	1.08415	1.06976	1.0559	1.02301	0.991085	0.973754	0.966502	0.952039	0.951128	0.943558	0.935174	0.928855	0.918541	0.910687	0.906755	0.904175	0.897833	0.889645	0.883848	0.883349	0.885755	0.883116
aha_iaa	0.992782	0.998437	1.00097	1.004	1.01058	1.01877	1.01982	1.02268	1.03268	1.03418	1.04505	1.04793	1.06166	1.06648	1.07933	1.08662	1.08957	1.08744	1.08418	1.07346	1.05348	1.03255	1.01314	0.999603	0.980272	0.96999	0.952468	0.945805	0.930481	0.922667	0.918863	0.901242	0.902347	0.896405	0.883854	0.880614	0.876815	0.875377	0.873526	0.866502	0.869795
aha_iaa	0.990305	0.996333	1.00041	1.00694	1.00741	1.012	1.01688	1.01849	1.02165	1.02142	1.02623	1.03118	1.03629	1.04447	1.05459	1.05526	1.05685	1.04936	1.04162	1.02825	1.00532	0.994014	0.97321	0.95166	0.934555	0.923963	0.922176	0.908033	0.901192	0.896188	0.889731	0.882695	0.879724	0.871465	0.866828	0.86214	0.856941	0.855057	0.854131	0.849479	0.849233
aha_iaa	0.99214	0.997146	1.00735	1.01301	1.01934	1.02583	1.03188	1.0383	1.04543	1.05365	1.06412	1.06859	1.07144	1.06519	1.05461	1.04027	1.02336	1.00673	0.992332	0.97289	0.962243	0.9509	0.940606	0.928628	0.913868	0.906566	0.900719	0.896095	0.891972	0.890751	0.890614	0.888177	0.891405	0.89375	0.89595	0.896457	0.898547	0.902596	0.905699	0.906585	0.899622
aha_iaa	0.99663	1.0059	1.00805	1.02017	1.02893	1.03647	1.0474	1.04724	1.0482	1.05958	1.06951	1.07247	1.06657	1.05851	1.05242	1.03899	1.01261	0.994724	0.973629	0.963445	0.946931	0.930423	0.924331	0.915409	0.904744	0.895298	0.890943	0.89349	0.897524	0.896619	0.899649	0.895694	0.889756	0.904538	0.906573	0.915805	0.917125	0.916136	0.915345	0.913371	0.91035
aha_iaa	0.989473	0.989565	1.00487	1.00522	1.01128	1.02338	1.02536	1.01905	1.02641	1.03482	1.04677	1.05308	1.05078	1.05556	1.05647	1.04461	1.0364	1.01796	1.00313	0.990234	0.974718	0.959077	0.94463	0.930522	0.922863	0.915475	0.903982	0.903514	0.892134	0.888139	0.88722	0.882309	0.87703	0.878197	0.877379	0.880013	0.880196	0.878793	0.878886	0.881817	0.880417
aha_iaa	0.98292	0.988717	0.995085	1.00482	1.01034	1.01607	1.02203	1.02553	1.03114	1.04135	1.04639	1.05717	1.06392	1.07035	1.07998	1.08901	1.08278	1.07743	1.06319	1.05018	1.03353	1.02163	1.0086	0.98724	0.9786	0.968328	0.958303	0.944532	0.937696	0.931336	0.920152	0.917309	0.909052	0.907179	0.897875	0.893319	0.897258	0.886433	0.889917	0.880698	0.881577
aha_iaa	1.00901	1.01369	1.02663	1.02521	1.02024	1.02433	1.02871	1.04483	1.06224	1.07513	1.07621	1.08843	1.10307	1.11431	1.11832	1.12039	1.13197	1.13162	1.1192	1.09901	1.07335	1.05006	1.03738	1.02211	0.999437	0.989654	0.977579	0.967195	0.953649	0.940491	0.939313	0.926086	0.915333	0.906872	0.900058	0.899133	0.892191	0.892077	0.889524	0.888654	0.885354
aha_iaa	0.99012	0.998493	1.00775	1.0052	1.01663	1.02538	1.02966	1.04373	1.05381	1.06132	1.06542	1.07965	1.08443	1.10032	1.09773	1.08943	1.09161	1.08073	1.06929	1.06265	1.0449	1.03723	1.01937	1.00394	0.990766	0.977346	0.965644	0.958134	0.947757	0.93894	0.934146	0.922592	0.917511	0.912599	0.903569	0.892422	0.888642	0.886119	0.884426	0.873382	0.868132
aha_iaa	0.986109	0.994435	0.998568	1.01417	1.02148	1.0275	1.03829	1.04321	1.0548	1.05945	1.06534	1.07276	1.08216	1.08537	1.08134	1.06872	1.05643	1.04403	1.01949	1.00334	0.989131	0.976142	0.9694	0.959658	0.945065	0.933795	0.926064	0.919552	0.912203	0.900767	0.902889	0.90284	0.892953	0.893181	0.892667	0.895332	0.887712	0.888749	0.886598	0.886867	0.885541
aha_iaa	0.963402	0.974366	0.98086	0.985504	0.998189	1.00383	1.00892	1.01819	1.03199	1.03683	1.04898	1.05615	1.06161	1.0614	1.05646	1.04813	1.02771	1.01398	0.998505	0.989552	0.977522	0.96826	0.957779	0.945607	0.940023	0.929717	0.927764	0.927048	0.917103	0.920557	0.913246	0.906779	0.903687	0.907141	0.905602	0.89555	0.903267	0.899285	0.891317	0.899405	0.894141
aha_iaa	0.97838	0.984666	0.99046	0.999599	1.00574	1.01603	1.02259	1.02971	1.0346	1.04738	1.0596	1.07262	1.08306	1.091	1.08573	1.08128	1.06119	1.04118	1.02266	1.00644	0.992173	0.972876	0.964504	0.950568	0.940342	0.927111	0.915471	0.90875	0.898651	0.897542	0.893559	0.889533	0.886775	0.884155	0.88634	0.887643	0.887014	0.88411	0.883456	0.876365	0.879811
aha_iaa	0.989669	1.00642	1.01283	1.02632	1.03305	1.04557	1.05825	1.06613	1.07185	1.08389	1.09497	1.10694	1.12377	1.128	1.13349	1.13035	1.11956	1.10381	1.08131	1.0638	1.04807	1.02317	1.00749	0.990566	0.976078	0.963882	0.950523	0.936729	0.925702	0.910487	0.903475	0.89786	0.892174	0.885842	0.878843	0.879863	0.881135	0.882469	0.886364	0.883717	0.884639
aha_iaa	0.965085	0.972063	0.974963	0.979694	0.985962	0.99118	0.997472	1.00686	1.01333	1.02947	1.03862	1.04205	1.04309	1.04623	1.03637	1.02164	1.00193	0.991967	0.98635	0.983545	0.9771	0.972715	0.961498	0.95825	0.953035	0.949634	0.952942	0.94696	0.945764	0.938878	0.937375	0.932372	0.929446	0.92366	0.917667	0.916774	0.920168	0.917935	0.916696	0.918513	0.913838
aha_iaa	0.959077	0.963576	0.972386	0.978197	0.986314	0.998548	1.01577	1.02304	1.03244	1.03735	1.03409	1.02857	1.02831	1.01726	1.00974	1.00113	0.99094	0.990177	0.985107	0.981135	0.969689	0.964225	0.957604	0.962006	0.949802	0.946863	0.943957	0.935288	0.934697	0.931415	0.928811	0.925928	0.929207	0.921337	0.91519	0.918244	0.912372	0.906874	0.893082	0.901532	0.90024
aha_iaa	0.957828	0.963518	0.971954	0.97098	0.978519	0.989095	0.999291	1.01384	1.02438	1.03745	1.05064	1.06308	1.07031	1.06775	1.06369	1.04672	1.03124	1.01292	0.999726	0.988946	0.981855	0.973839	0.967264	0.962948	0.953733	0.945457	0.938475	0.933613	0.929654	0.916659	0.91704	0.911875	0.90895	0.904217	0.901908	0.898981	0.898211	0.896679	0.892884	0.892299	0.88864
aha_iaa	0.970299	0.976441	0.987614	0.996161	1.00328	1.01835	1.02554	1.03909	1.06158	1.07886	1.08984	1.09669	1.09993	1.09992	1.08242	1.06443	1.05104	1.03378	1.01642	1.00429	0.993897	0.983147	0.967568	0.962483	0.957291	0.949441	0.9466	0.936853	0.93788	0.935391	0.934405	0.930314	0.928938	0.930364	0.923799	0.920357	0.92474	0.922998	0.92177	0.921954	0.922837
aha_iaa	0.972283	0.97441	0.982336	0.993061	1.00631	1.019	1.03288	1.0573	1.06248	1.07591	1.07917	1.06392	1.06256	1.06039	1.04917	1.03756	1.02096	1.00614	0.982461	0.973398	0.958657	0.948371	0.942299	0.932351	0.923686	0.915752	0.908525	0.903019	0.898834	0.899305	0.899022	0.893128	0.894041	0.895551	0.896237	0.889099	0.891929
aha_iaa	0.97586	0.976385	0.979205	0.988446	0.998261	1.00324	1.01355	1.02399	1.03147	1.04137	1.05192	1.06827	1.0861	1.09255	1.09568	1.08827	1.08091	1.06725	1.05231	1.0398	1.02269	1.01119	1.0015	0.992505	0.983413	0.982622	0.974057	0.966946	0.958389	0.952553	0.944618	0.938773	0.933593	0.928971	0.925266	0.921854	0.913065	0.908609	0.902637	0.905738	0.9024
aha_iaa	0.963173	0.969412	0.971035	0.981965	0.989835	0.995713	1.00983	1.01669	1.0307	1.0435	1.04838	1.04931	1.04842	1.04558	1.03697	1.02852	1.01752	1.00587	0.989736	0.976917	0.965496	0.960033	0.950157	0.943045	0.949107	0.933945	0.93398	0.925272	0.922484	0.921881	0.917875	0.912089	0.91415	0.891735	0.907482	0.905459	0.901324	0.901689	0.894772	0.892913	0.898654
aha_iaa	0.963058	0.969136	0.980417	0.988143	0.995355	1.00725	1.02507	1.03571	1.05351	1.04927	1.04404	1.04033	1.03831	1.03321	1.02483	1.00772	0.995746	0.983194	0.972279	0.965109	0.959746	0.941471	0.936401	0.931833	0.924609	0.923987	0.914941	0.916773	0.91045	0.911517	0.912771	0.910957	0.909155	0.905577	0.903847	0.908613	0.906446	0.897164	0.890036	0.883004	0.890259
pp2c_iaa	1.10777	1.10666	1.07796	1.09468	1.10466	1.12228	1.14016	1.154	1.15859	1.16453	1.16606	1.17932	1.19349	1.20923	1.23005	1.25162	1.27461	1.28981	1.30204	1.30264	1.28643	1.26043	1.23946	1.20644	1.17968	1.15656	1.12812	1.0994	1.08891	1.06318	1.05303	1.04334	1.03163	1.03042	1.01471	1.01501	1.01163	1.00565	1.00458	1.00618	1.00472
pp2c_iaa	1.04618	1.04944	1.05271	1.05324	1.05821	1.05802	1.06425	1.0704	1.08025	1.08665	1.09273	1.10934	1.12361	1.1381	1.15514	1.17202	1.18694	1.18467	1.18187	1.16715	1.14599	1.12133	1.10437	1.08201	1.06471	1.05352	1.04148	1.03564	1.02516	1.01577	1.0105	1.00112	0.993373	0.991853	0.991671	0.986748	0.987216	0.979102	0.972379	0.968409	0.976683
pp2c_iaa	1.09025	1.09493	1.09762	1.1071	1.11266	1.12023	1.12084	1.13109	1.13834	1.14727	1.15613	1.16126	1.17757	1.19244	1.20241	1.22217	1.22049	1.23359	1.24566	1.24966	1.25075	1.24647	1.23884	1.23221	1.20923	1.2018	1.18347	1.1704	1.15474	1.14465	1.12993	1.12054	1.1072	1.09707	1.07993	1.06951	1.05745	1.05278	1.05159	1.04146	1.03776
pp2c_iaa	1.12936	1.13438	1.13991	1.14881	1.16029	1.16047	1.17042	1.17766	1.17556	1.18024	1.1886	1.19406	1.19095	1.20009	1.25877	1.26849	1.27097	1.26537	1.24994	1.23199	1.23069	1.21221	1.19891	1.18521	1.16887	1.14953	1.13999	1.1303	1.1201	1.11405	1.10856	1.09948	1.08526	1.07902	1.07346	1.06643	1.06112	1.06187	1.05781	1.05185	1.05034
pp2c_iaa	1.08081	1.08855	1.08646	1.0921	1.09664	1.09858	1.10206	1.10842	1.11747	1.1262	1.1266	1.13763	1.14199	1.15391	1.17345	1.18628	1.19563	1.20148	1.20264	1.18996	1.17737	1.14579	1.11949	1.10315	1.07838	1.06682	1.04652	1.03551	1.01159	1.00682	0.99756	0.987883	0.984008	0.975632	0.972917	0.965106	0.959603	0.957816	0.959542	0.960974	0.964369
pp2c_iaa	1.12679	1.13209	1.13866	1.14453	1.15065	1.14474	1.16023	1.17739	1.19015	1.19272	1.19914	1.20093	1.20528	1.20065	1.20872	1.20875	1.22964	1.24806	1.26833	1.27046	1.26764	1.26125	1.24892	1.22985	1.20612	1.19292	1.16611	1.1554	1.13373	1.1275	1.12114	1.10592	1.09935	1.08527	1.06733	1.06287	1.05595	1.05387	1.04848	1.04129	1.0376
pp2c_iaa	1.11037	1.1128	1.11747	1.12931	1.13904	1.14585	1.15086	1.16186	1.16591	1.16954	1.17941	1.19019	1.20145	1.20781	1.21643	1.23524	1.24682	1.27026	1.2667	1.26327	1.25521	1.23633	1.20456	1.17819	1.14562	1.12237	1.10542	1.09022	1.06527	1.05097	1.03134	1.01893	1.01419	1.00312	0.99456	0.990072	0.986449	0.986168	0.981368	0.978007	0.97387
pp2c_iaa	0.972464	0.974954	0.977551	0.98809	0.992785	0.999553	1.00912	1.02115	1.02695	1.02903	1.03292	1.03508	1.05667	1.06759	1.07826	1.08147	1.0818	1.08904	1.08772	1.08371	1.0686	1.05438	1.04856	1.02206	1.00795	0.991444	0.967165	0.953705	0.943275	0.925285	0.91421	0.906096	0.897495	0.88494	0.873234	0.869264	0.862045	0.855352	0.847585	0.84599	0.839336
pp2c_iaa	0.930342	0.932993	0.932966	0.929045	0.930614	0.931005	0.927766	0.92638	0.923391	0.925407	0.929509	0.939478	0.948117	0.953248	0.963731	0.970713	0.97979	0.986423	0.991547	1.00094	1.00952	1.01846	1.02632	1.03409	1.04794	1.04884	1.04582	1.03648	1.0253	1.01364	1.00738	0.994473	0.98296	0.967121	0.953393	0.945941	0.933854	0.928367	0.915148	0.910715	0.898117
pp2c_iaa	0.958729	0.966289	0.965685	0.970641	0.973707	0.984841	0.99521	0.999382	1.01179	1.01236	1.01633	1.02603	1.03431	1.04077	1.05601	1.07758	1.08742	1.10196	1.12206	1.13798	1.14055	1.14128	1.14162	1.14197	1.13765	1.12187	1.10987	1.08933	1.07374	1.05915	1.03706	1.02473	1.0113	0.996424	0.969524	0.959884	0.945882	0.942961	0.933278	0.923886	0.920132
pp2c_iaa	0.960974	0.967669	0.966906	0.974585	0.980235	0.99185	0.998987	1.00704	1.02118	1.02969	1.03454	1.03577	1.05002	1.0563	1.063	1.06981	1.06632	1.09696	1.10593	1.12449	1.13932	1.14842	1.15715	1.1497	1.14032	1.13722	1.13068	1.12041	1.09972	1.09015	1.06932	1.05382	1.03085	1.01682	1.00771	1.00076	0.988654	0.97466	0.964529	0.952438	0.946074
pp2c_iaa	0.975087	0.983874	0.989464	0.993306	0.997749	1.00288	1.00538	1.00167	1.00723	1.01672	1.02155	1.029	1.0442	1.04425	1.05596	1.0656	1.08621	1.10281	1.11289	1.1302	1.13589	1.14075	1.12303	1.11898	1.11483	1.10531	1.0914	1.07152	1.05008	1.03287	1.02568	1.00131	0.984521	0.970653	0.964603	0.954286	0.947458	0.938957	0.93018	0.919481	0.909072
pp2c_iaa	0.934205	0.933105	0.929429	0.928251	0.932841	0.93289	0.934561	0.93822	0.940551	0.947393	0.952747	0.959583	0.969635	0.977657	0.982773	0.996966	1.00483	1.01558	1.02685	1.0272	1.04064	1.04035	1.05122	1.05478	1.06708	1.05659	1.04764	1.03336	1.02536	1.00665	0.992785	0.980707	0.95791	0.943336	0.922552	0.907598	0.892397	0.884928	0.868182	0.857485	0.853035
pp2c_iaa	0.997292	1.00341	1.01763	1.02699	1.03859	1.05175	1.05638	1.06863	1.05578	1.05813	1.06897	1.0942	1.12546	1.14123	1.15723	1.16388	1.17557	1.18734	1.19818	1.20394	1.20179	1.20316	1.193	1.18539	1.17402	1.15292	1.13997	1.11996	1.10402	1.08593	1.06785	1.05108	1.03154	1.01563	1.00088	0.992154	0.977465	0.968084	0.952366	0.948899	0.94196
pp2c_iaa	0.929243	0.924749	0.920525	0.924506	0.923304	0.926927	0.928226	0.929813	0.938136	0.935808	0.942517	0.945933	0.953703	0.959853	0.969194	0.980319	0.984221	0.995444	1.00664	1.01517	1.02252	1.01866	1.01784	1.01624	1.00903	1.0031	0.990546	0.976502	0.968392	0.959236	0.946245	0.93164	0.924731	0.910318	0.908423	0.902475	0.895888	0.892791	0.888153	0.87843	0.876875
pp2c_iaa	0.971391	0.980721	0.979872	0.980837	0.986224	0.994493	1.00507	1.00464	1.00874	1.015	1.02244	1.02613	1.03248	1.0341	1.03883	1.04944	1.06272	1.06808	1.0766	1.07424	1.06725	1.07534	1.08622	1.07637	1.07406	1.06206	1.04795	1.03116	1.0111	0.990263	0.973804	0.962691	0.950525	0.939635	0.930038	0.918132	0.907186	0.902964	0.892587	0.886909	0.879338
pp2c_iaa	0.979914	0.981418	0.996639	1.00931	1.02785	1.04377	1.05696	1.07127	1.08479	1.08755	1.09198	1.11026	1.11952	1.12112	1.12944	1.14112	1.14068	1.1266	1.12862	1.13433	1.14201	1.1491	1.14602	1.12827	1.11523	1.11116	1.10002	1.08402	1.07548	1.0647	1.05398	1.04573	1.04165	1.03434	1.02264	1.01694	1.00581	0.999519	0.998545	0.98676	0.987765
pp2c_iaa	0.924636	0.921796	0.929134	0.929563	0.930632	0.941504	0.946646	0.949594	0.955826	0.959356	0.961995	0.964467	0.966434	0.968926	0.97314	0.980392	0.992871	0.99734	1.00637	1.0177	1.01903	1.02891	1.03837	1.04459	1.05767	1.06837	1.07011	1.0674	1.05651	1.04292	1.0306	1.01513	1.00511	0.986777	0.976518	0.969893	0.955583	0.945325	0.936887	0.93043	0.924858
pp2c_iaa	0.965548	0.970721	0.985811	0.996502	0.99323	1.001	1.00874	1.01684	1.01428	1.02647	1.04005	1.04662	1.07126	1.08954	1.09853	1.118	1.13463	1.14799	1.15317	1.173	1.16954	1.15821	1.14196	1.12144	1.10395	1.09166	1.07305	1.05924	1.04658	1.03501	1.01753	1.00893	0.999049	0.989211	0.988885	0.978996	0.968231	0.957423	0.949274	0.94304	0.93023
pp2c_iaa	0.964412	0.972948	0.978127	0.987801	1.00046	1.01903	1.03728	1.033	1.04054	1.0526	1.0524	1.06943	1.07674	1.08697	1.11089	1.13203	1.13757	1.14591	1.15629	1.15036	1.14935	1.13398	1.11736	1.10471	1.09169	1.06613	1.04904	1.03803	1.0271	1.01375	1.00622	0.996071	0.9861	0.976438	0.968674	0.966012	0.964594	0.952219	0.949275	0.947263	0.943872
pp2c_iaa	0.956474	0.959366	0.960703	0.968822	0.975703	0.983596	0.995407	1.00236	1.01635	1.01766	1.0168	1.02518	1.02858	1.03541	1.05377	1.05313	1.05848	1.06938	1.07374	1.0835	1.09129	1.0882	1.07984	1.06105	1.04813	1.02907	1.01912	1.00975	1.00474	0.991156	0.97892	0.976318	0.975507	0.968807	0.957137	0.953254	0.952601	0.949131	0.94957	0.943971	0.94346
pp2c_iaa	0.985578	0.99044	1.00107	1.01169	1.02133	1.0351	1.05179	1.06596	1.07204	1.08321	1.1005	1.11025	1.11813	1.12651	1.13187	1.14435	1.14771	1.15545	1.1659	1.17403	1.18511	1.18539	1.18818	1.18895	1.18722	1.17277	1.15551	1.13546	1.11441	1.08783	1.07975	1.0669	1.04371	1.02966	1.01186	0.998332	0.993901	0.986132	0.972813	0.970507	0.968589
pp2c_iaa	0.902786	0.908106	0.907763	0.914123	0.922674	0.926885	0.920853	0.923032	0.926745	0.943142	0.968006	0.976521	0.985951	0.989707	0.995231	0.997732	0.992589	0.97608	0.971047	0.958459	0.944547	0.925112	0.908282	0.892822	0.8822	0.88441	0.879485	0.858088	0.841209	0.829673	0.822955	0.812045	0.801909	0.798139	0.801872	0.802624	0.802741	0.800524	0.803979	0.798546	0.798586
pp2c_iaa	0.951941	0.961715	0.969792	0.980501	0.98873	0.996326	1.00416	1.00474	1.00121	1.00392	0.9998	1.00887	1.02356	0.999802	0.968917	0.977664	0.999613	0.997632	0.996363	0.998894	1.00336	0.99188	0.988026	0.978378	0.965952	0.955157	0.937881	0.929931	0.91854	0.90745	0.901443	0.890417	0.879151	0.872037	0.854959	0.848774	0.845462	0.837364	0.843807	0.837064	0.819637
pp2c_iaa	0.926551	0.935962	0.942619	0.933316	0.938937	0.938658	0.940177	0.941445	0.945243	0.952579	0.950657	0.940595	0.947911	0.943114	0.946034	0.941558	0.94851	0.957373	0.971962	0.977881	0.985587	1.00156	1.00188	1.01238	1.01068	1.01728	1.01134	1.01225	1.00043	0.988501	0.974675	0.960295	0.954947	0.94816	0.937281	0.926611	0.920963	0.915115	0.905284	0.898729	0.890476
pp2c_iaa	0.962373	0.97046	0.969339	0.971929	0.984016	0.988154	0.996452	0.997232	1.00228	1.00815	1.01315	1.01383	1.0213	1.02248	1.02532	1.0293	1.03901	1.04368	1.04732	1.05925	1.06852	1.06497	1.06515	1.0811	1.06864	1.0638	1.06261	1.04579	1.02892	1.0184	0.999561	0.984424	0.979808	0.96716	0.953166	0.939636	0.934017	0.923244	0.916271	0.912996	0.902275
pp2c_iaa	0.942114	0.949903	0.956036	0.958833	0.966013	0.982652	0.986664	0.990448	0.986851	0.982357	0.985453	0.99691	1.014	1.03371	1.05048	1.06749	1.07422	1.07543	1.08243	1.0763	1.07524	1.06913	1.053	1.02932	1.00828	0.985857	0.961163	0.934817	0.917549	0.897661	0.881251	0.868047	0.848643	0.839086	0.828719	0.821037	0.813171	0.806683	0.804428	0.801504	0.798289
pp2c_iaa	0.966304	0.959544	0.953128	0.937054	0.944912	0.982108	1.01247	1.02532	1.03679	1.04229	1.05232	1.06315	1.05211	1.08759	1.10435	1.12629	1.13698	1.14252	1.14879	1.14717	1.14224	1.13726	1.12545	1.11739	1.1017	1.08796	1.0676	1.0545	1.04228	1.02659	1.01773	1.00905	1.00771	1.00253	1.00036	0.999401	0.995485	0.993503	0.993352	0.989776	0.98748
pp2c_iaa	0.963062	0.96899	0.974557	0.979999	0.989545	1.0029	1.016	1.02201	1.02708	1.02294	1.03893	1.04002	1.07785	1.09571	1.11314	1.13504	1.15801	1.185	1.19827	1.21253	1.22534	1.22976	1.22681	1.22847	1.22024	1.21315	1.19505	1.17438	1.15374	1.12883	1.11867	1.11375	1.09401	1.08467	1.07317	1.06383	1.05799	1.05184	1.04419	1.03852	1.03422
pp2c_iaa	0.978896	0.98435	0.992711	1.00147	1.00987	1.02107	1.03329	1.04275	1.05432	1.06423	1.07115	1.08204	1.09464	1.10708	1.12531	1.14285	1.15671	1.17161	1.18207	1.20732	1.20703	1.19952	1.1818	1.16126	1.16108	1.14136	1.1242	1.0982	1.07732	1.06879	1.05088	1.04021	1.03002	1.01982	1.01098	1.00272	1.0007	0.998711	0.992102	0.990599	0.990151
pp2c_iaa	0.929714	0.933904	0.936218	0.937686	0.94011	0.954228	0.97265	0.978961	0.991303	0.996275	1.00738	1.01471	1.02647	1.04953	1.07038	1.08843	1.10516	1.13132	1.14986	1.16838	1.18002	1.16067	1.1561	1.12072	1.11333	1.1221	1.10856	1.09542	1.08183	1.06112	1.05629	1.04191	1.03013	1.02214	1.02029	1.01889	1.01462	1.01633	1.01556	1.0156	1.01258
pp2c_iaa	0.918849	0.918656	0.919045	0.920251	0.929296	0.929601	0.940383	0.956177	0.964598	0.971527	0.976862	0.986273	1.00003	1.01294	1.02428	1.02943	1.0373	1.05272	1.06755	1.10419	1.12746	1.13774	1.14041	1.13973	1.13317	1.12462	1.11402	1.10605	1.09179	1.08032	1.06505	1.06114	1.05032	1.03487	1.03432	1.02244	1.02085	1.01615	1.01201	1.01357	1.0072
pp2c_iaa	0.976935	0.98493	0.991896	1.00162	1.01479	1.02773	1.03431	1.04501	1.0528	1.0634	1.07343	1.08694	1.10039	1.11146	1.11597	1.11985	1.12457	1.12893	1.12868	1.11895	1.10564	1.10692	1.09076	1.08515	1.06582	1.05699	1.04285	1.03859	1.03092	1.02801	1.01783	1.01539	1.01298	1.00977	1.00776	1.0062	0.9959	0.994671	0.995573	0.991259	0.987713
pp2c_iaa	0.962198	0.963563	0.970069	0.981436	0.992688	0.996518	1.00193	1.01521	1.03303	1.05379	1.05844	1.06828	1.0774	1.10309	1.11781	1.13254	1.15425	1.17176	1.19955	1.20745	1.20942	1.21607	1.22186	1.21081	1.19469	1.18688	1.1687	1.14602	1.13021	1.11455	1.09583	1.08007	1.06753	1.05452	1.04822	1.03814	1.03515	1.02823	1.02885	1.02493	1.02037
pp2c_iaa	0.932681	0.932764	0.935856	0.929317	0.936566	0.947032	0.96009	0.969906	0.977512	0.983852	0.997258	1.00637	1.02281	1.03135	1.03897	1.05724	1.07917	1.09436	1.11761	1.12887	1.14872	1.15277	1.1606	1.16003	1.15847	1.16336	1.1505	1.13781	1.12208	1.11309	1.08988	1.08078	1.06706	1.04976	1.04298	1.02962	1.02758	1.02279	1.01899	1.01626	1.01555
pp2c_iaa	0.977191	0.98627	0.983075	0.994573	1.00232	1.01511	1.02276	1.02673	1.03187	1.05285	1.0675	1.07438	1.08322	1.10087	1.11432	1.1299	1.14263	1.1547	1.16057	1.16634	1.18048	1.17627	1.17114	1.16795	1.15625	1.14544	1.13219	1.11405	1.10391	1.09181	1.08079	1.06817	1.05687	1.04617	1.04073	1.03457	1.03051	1.02841	1.02311	1.02499	1.02215
pp2c_iaa	0.965665	0.972511	0.969895	0.979256	0.990735	0.994353	1.00054	1.00991	1.01219	1.01955	1.02687	1.03848	1.05004	1.06552	1.08033	1.09082	1.11017	1.13114	1.1592	1.16618	1.1779	1.18432	1.19574	1.19965	1.19836	1.1645	1.1459	1.16297	1.1622	1.15684	1.14487	1.13697	1.12295	1.1064	1.09318	1.07612	1.06233	1.05799	1.05299	1.0513	1.04551
pp2c_iaa	0.934484	0.934217	0.928325	0.935748	0.94566	0.946206	0.952297	0.952383	0.961816	0.968711	0.978131	0.986595	0.992895	1.00185	1.01791	1.03617	1.05136	1.06032	1.06971	1.07305	1.07917	1.0779	1.07693	1.06073	1.04763	1.03556	1.02382	1.0161	1.0042	0.992754	0.991015	0.981329	0.975647	0.971115	0.961838	0.961353	0.957961	0.958752	0.956515	0.959115	0.957908
pp2c_iaa	0.946861	0.949101	0.957623	0.961688	0.962797	0.973882	0.981696	0.991137	0.997556	1.01061	1.01282	1.01098	1.0187	1.02182	1.03092	1.04138	1.05697	1.06136	1.07171	1.082	1.09135	1.10109	1.09594	1.09964	1.09435	1.08832	1.07354	1.0612	1.04826	1.03384	1.02544	1.0217	1.00916	1.00813	1.00363	0.995927	0.994341	0.990085	0.991523	0.993327	0.996828

## Sheet: S2-2j
distance from root tip (µm)	0	20	40	60	80	100	120	140	160	180	200	220	240	260	280	300	320	340	360	380	400	420	440	460	480	500	520	540	560	580	600	620	640	660	680	700	720	740	760	780	800
col_iaa	0.0572503	0.0598861	0.0599349	0.0611167	0.0690867	0.0655223	0.0581989	0.0625799	0.0702355	0.0681971	0.0768653	0.08019	0.0824286	0.0841532	0.0932031	0.0869866	0.103184	0.107425	0.111832	0.115785	0.104879	0.104458	0.112115	0.11217	0.100631	0.0989842	0.100273	0.101751	0.103013	0.107108	0.113781	0.115805	0.119648	0.119372	0.120569	0.113551	0.118976	0.116348	0.113354	0.113536	0.111651
col_iaa	0.0665937	0.0662675	0.0658154	0.0658228	0.0659229	0.0742257	0.0789515	0.0857027	0.0879694	0.0919901	0.0911083	0.0976693	0.101173	0.111702	0.129351	0.139212	0.156856	0.178644	0.195586	0.202565	0.199649	0.186314	0.188877	0.184155	0.175879	0.171631	0.168645	0.164195	0.168879	0.162698	0.163426	0.155907	0.1542	0.153908	0.145031	0.132041	0.131642	0.129243	0.127895	0.122978	0.120163
col_iaa	0.0702359	0.0747489	0.0804479	0.0773662	0.0852995	0.0909238	0.0950449	0.101871	0.103131	0.102576	0.101457	0.0994728	0.0957608	0.097609	0.0909428	0.098433	0.11746	0.146674	0.16184	0.17606	0.190118	0.216716	0.234693	0.240538	0.242533	0.242649	0.248825	0.234335	0.230584	0.22021	0.209768	0.203883	0.205853	0.191969	0.192045	0.181479	0.178211	0.173564	0.167304	0.166726	0.170053
col_iaa	0.0305999	0.031608	0.0245707	0.0301266	0.0320821	0.0311079	0.0353462	0.0399766	0.0345045	0.0386899	0.0379133	0.0457663	0.0468767	0.0561633	0.0639829	0.0742139	0.0915459	0.104797	0.121126	0.132999	0.1398	0.154588	0.16368	0.167756	0.169282	0.164953	0.157404	0.156367	0.160799	0.156067	0.160748	0.163169	0.160429	0.164214	0.164349	0.160217	0.162786	0.174077	0.162553	0.160669	0.158464
col_iaa	0.0577818	0.0673533	0.0597256	0.0571106	0.0652953	0.0648443	0.0661766	0.0681343	0.0789374	0.077143	0.0793962	0.0856794	0.0821281	0.0988053	0.0883545	0.0381441	0.0293512	0.02837	0.0400018	0.0657551	0.0883524	0.100956	0.105951	0.115263	0.128742	0.167461	0.168465	0.149905	0.152477	0.156674	0.150908	0.146781	0.141046	0.135092	0.140498	0.1346	0.129431	0.132243	0.130777	0.124903	0.123887
col_iaa	0.0973515	0.0940149	0.092384	0.0944141	0.0982109	0.100462	0.103872	0.102575	0.104657	0.101416	0.0919696	0.089553	0.081736	0.0953945	0.110158	0.117069	0.115433	0.111474	0.12478	0.130272	0.159243	0.184381	0.182635	0.177181	0.173686	0.173148	0.172536	0.177269	0.17057	0.165607	0.162651	0.164871	0.165847	0.165972	0.166719	0.156999	0.151338	0.146674	0.146128	0.151202	0.145545
col_iaa	0.0346832	0.040268	0.0484128	0.0525959	0.0608025	0.0651465	0.0405301	0.058818	0.106569	0.12789	0.139106	0.127471	0.0971578	0.0913955	0.0875473	0.0725952	0.058801	0.0344619	0.0141523	-0.0196612	-0.044937	-0.0625495	-0.0700652	-0.0761896	-0.0850516	-0.0849872	-0.0794131	-0.073249	-0.0688763	-0.0635004	-0.0574894	-0.0491371	-0.0351274	-0.028092	-0.0231778	-0.0205476	-0.0159874	-0.00572363	-0.00252139	0.00529033	0.0133978
col_iaa	0.0335263	0.0390729	0.0430779	0.0501526	0.0552017	0.0624149	0.0687341	0.0713245	0.0816698	0.0842185	0.0845038	0.0879196	0.0914588	0.101562	0.101113	0.117026	0.123714	0.139778	0.150159	0.141237	0.129371	0.11042	0.111047	0.116398	0.108686	0.0980553	0.0983812	0.090378	0.0912963	0.0824381	0.0766123	0.07774	0.072443	0.0651449	0.0608085	0.0612057	0.0583087	0.0559969	0.0461167	0.0408041	0.0404312
col_iaa	0.0280685	0.0340294	0.0376298	0.0444514	0.043271	0.0432604	0.0323941	0.0195156	0.0199664	0.0130594	0.0110597	0.0035803	-0.0070249	-0.0200891	-0.0347222	-0.0590122	-0.0715706	-0.0862242	-0.096179	-0.109536	-0.1073	-0.106833	-0.101473	-0.087854	-0.0833417	-0.0692315	-0.0602707	-0.0476413	-0.0394072	-0.0339051	-0.0212345	-0.00859146	-0.00516799	-0.000681171	0.00800489	0.0103271	0.0179841	0.0267604	0.0316789	0.0396846	NA
col_iaa	-0.0312819	-0.0335612	-0.037052	-0.0371819	-0.035541	-0.037141	-0.0336028	-0.0423396	-0.0338101	-0.0303121	-0.0279908	-0.0187428	-0.0205708	-0.00416626	0.00672454	0.0159481	0.0222909	0.0224542	0.021156	0.0187025	0.0139519	0.00597579	0.00612718	0.012369	0.00708974	0.00906453	0.0100258	0.00483855	0.00276526	-0.00190691	-0.0064614	-0.00703426	-0.0074975	-0.00781601	-0.00538362	-0.00739702	-0.00967572	-0.011001	-0.0142204	-0.0145916	-0.0177429
col_iaa	-0.00275411	-0.00106604	0.00287517	0.00678723	0.00653185	0.00224773	-0.0152538	-0.0172476	-0.01457	-0.00183643	0.00919902	0.0103226	0.00900371	0.00707664	0.00571697	0.0110873	0.0167905	0.00731784	0.00884058	-0.00231203	-0.00840141	-0.0108195	-0.0110507	-0.0166966	-0.0201907	-0.0150746	-0.00710742	-0.000608354	0.00333436	0.000165683	0.00432597	0.0101312	0.00289707	0.00483396	0.007447	0.0018735	0.00139285	-0.00771563	-0.00786768	-0.00515408	-0.00702558
col_iaa	0.0826932	0.0762425	0.080694	0.0942763	0.114501	0.122583	0.138914	0.148758	0.143879	0.15819	0.1625	0.14273	0.119028	0.106604	0.0933302	0.0737741	0.049273	0.0236846	-0.00362454	-0.0251439	-0.030836	-0.0370125	-0.0309463	-0.0224333	-0.0229837	-0.0149167	0.00031469	0.00566634	0.00759552	0.0151567	0.0166667	0.0188476	0.0352017	0.0266816	0.0339805	0.0382673	0.0429555	0.0455626	0.0522384	0.0503297	0.0363501
col_iaa	0.0419182	0.0340339	0.0372236	0.0423359	0.0468218	0.0487211	0.0462295	0.0616778	0.0736419	0.0843972	0.0935507	0.102027	0.112583	0.117885	0.140039	0.146897	0.15965	0.159035	0.172713	0.174534	0.169598	0.171928	0.160809	0.163853	0.159502	0.157441	0.149556	0.14695	0.145263	0.145901	0.144857	0.139298	0.129509	0.12887	0.122667	0.127333	0.123317	0.120674	0.120084	0.113506	0.117702
col_iaa	0.0289086	0.0366812	0.0446291	0.0609788	0.0714161	0.0823195	0.0917197	0.104625	0.115075	0.121553	0.129469	0.13156	0.131782	0.136408	0.128555	0.120331	0.108365	0.0967206	0.0819534	0.0624703	0.0431244	0.032555	0.0282887	0.0284024	0.0266774	0.0232264	0.0320357	0.0348581	0.0405057	0.0456015	0.0530026	0.056283	0.0608733	0.0610372	0.0664249	0.0604973	0.0686951	0.0663093	0.0575525	0.0691965	0.0721243
col_iaa	0.0186705	0.0283526	0.0130131	0.0135554	0.0239643	0.0221468	0.0258094	0.0357049	0.0683436	0.103528	0.133008	0.127335	0.146974	0.145487	0.111078	0.0818112	0.0711765	0.045116	0.0185573	0.00477164	-0.00334478	-0.013005	-0.0100457	0.0196981	0.0463277	0.044432	0.0453799	0.0475404	0.052003	0.0565405	0.0543881	0.0546851	0.0564751	0.057112	0.0610023	0.054036	0.0551697	0.0627672	0.0672942	0.0636248	0.0635485
col_iaa	0.00604832	0.0109216	0.0135611	0.00417743	-0.00755367	-0.00427572	0.0040309	0.0177486	0.0283546	0.0325125	0.0443268	0.0496087	0.0545263	0.0684699	0.0775934	0.0905714	0.0998871	0.10334	0.106701	0.103725	0.105303	0.101021	0.0943191	0.0815098	0.0842253	0.0847492	0.0838639	0.0801165	0.0801483	0.0751538	0.0738964	0.0768106	0.0815468	0.0820674	0.0765289	0.0791023	0.0731208	0.0859881	0.0816781	0.0792618	0.0831959
col_iaa	0.058518	0.05777	0.0614335	0.072442	0.0825539	0.0834824	0.0822436	0.0901304	0.0839899	0.0802653	0.094221	0.101958	0.111359	0.124287	0.13511	0.13521	0.135992	0.140082	0.131533	0.12676	0.119688	0.113869	0.110056	0.105838	0.110093	0.108848	0.110879	0.122312	0.123609	0.128924	0.125596	0.126468	0.127581	0.12365	0.124538	0.123211	0.123479	0.118301	0.120455	0.113528	0.110789
col_iaa	0.0399766	0.0487182	0.0547245	0.0588098	0.0710666	0.0736011	0.0802784	0.076928	0.0669689	0.0701085	0.0739878	0.0856789	0.13045	0.142121	0.159971	0.183369	0.197788	0.205768	0.214233	0.218142	0.217221	0.206365	0.201748	0.202567	0.194092	0.199731	0.200879	0.198948	0.196459	0.199121	0.19281	0.191192	0.190175	0.188579	0.185207	0.182607	0.186429	0.178143	0.173662	0.175568	0.172206
col_iaa	0.0502419	0.0498069	0.0437601	0.0452643	0.0603449	0.0634594	0.0856283	0.0900053	0.0972482	0.0942066	0.0984982	0.103327	0.102801	0.114925	0.125638	0.13444	0.15139	0.16022	0.167942	0.17073	0.162374	0.152099	0.139967	0.137285	0.13612	0.131248	0.128878	0.125948	0.119617	0.120287	0.110079	0.110457	0.108831	0.105831	0.103242	0.105964	0.10498	0.1117	0.106961	0.111772	0.11787
col_iaa	0.0345613	0.0457766	0.0511385	0.0556098	0.0667001	0.0737915	0.0774558	0.0671254	0.0779171	0.0958685	0.0976846	0.0910656	0.102963	0.101362	0.114356	0.11833	0.128079	0.138842	0.163603	0.159809	0.152242	0.150109	0.154877	0.150953	0.144312	0.148491	0.148645	0.143486	0.137429	0.129904	0.126201	0.121185	0.114264	0.110863	0.108354	0.0983091	0.107705	0.102943	0.102237	0.104372	0.108829
col_iaa	-0.00616523	0.00174597	0.00752767	0.00238479	0.00774656	0.00221685	0.0120504	0.0228371	0.0352438	0.052514	0.0711075	0.0830496	0.0929119	0.0931038	0.0980298	0.0884553	0.0848687	0.0769214	0.0678162	0.0522062	0.0381087	0.040714	0.0363901	0.0378542	0.0482254	0.0532391	0.0522183	0.0650203	0.064749	0.0618903	0.064301	0.0708606	0.0723934	0.0743156	0.0754658	0.0784795	0.0845872	0.0787681	0.0851888	0.0851941	0.0857029
col_iaa	0.0191032	0.0174999	0.0143152	0.0125957	0.0143794	0.016846	0.0241189	0.0302106	0.0336343	0.0328644	0.0395948	0.0524633	0.059728	0.0660083	0.0787852	0.10106	0.110723	0.126227	0.138296	0.156959	0.163226	0.164696	0.164528	0.166106	0.15564	0.151225	0.148865	0.145492	0.146735	0.14332	0.144347	0.139827	0.143559	0.146774	0.147259	0.145523	0.146649	0.147908	0.149715	0.153079	0.151832
col_iaa	0.00692728	0.00146455	0.00452711	0.00153701	0.00256654	0.00195071	0.00897771	0.0130674	0.0112511	0.0201304	0.0251175	0.0198091	0.0282921	0.037207	0.0386535	0.0548662	0.0660859	0.0643762	0.0682785	0.0680946	0.0681297	0.0653636	0.0602955	0.0525598	0.0436117	0.0438794	0.0391963	0.0453913	0.0518889	0.0474085	0.0538809	0.0553533	0.0563019	0.063237	0.0614456	0.0622074	0.0639295	0.0649457	0.0632918	0.0674234	0.0666118
col_iaa	0.0061917	0.0131411	0.0124846	0.0063436	0.0129815	0.0111161	0.0153838	0.0243536	0.034444	0.0299223	0.0327874	0.0363694	0.0473925	0.0509873	0.0559071	0.0663123	0.0806947	0.0898003	0.0890688	0.0799024	0.0777726	0.0817748	0.0793406	0.0810516	0.0756373	0.0725987	0.0740008	0.080419	0.0854499	0.095768	0.0952178	0.0950474	0.101711	0.0994908	0.0986264	0.102709	0.102404	0.0995056	0.097746	0.0935198	0.0960929
col_iaa	0.0226269	0.0252086	0.0200685	0.0237726	0.028427	0.0238708	0.0279982	0.0268812	0.0351967	0.0452925	0.0528501	0.0642428	0.0676881	0.0748561	0.0795453	0.0777289	0.0896038	0.0841981	0.083802	0.0781541	0.07218	0.0691089	0.0616602	0.0578694	0.0615067	0.0593125	0.0617575	0.0723886	0.0724032	0.0773195	0.0810152	0.0821412	0.0793383	0.0877762	0.0896002	0.0857189	0.0898948	0.0924762	0.0890535	0.0801464	0.0870132
aha_iaa	0.0149978	0.00909278	0.0146993	0.0119662	0.0119016	0.00406163	0.0105977	0.00889839	0.0151279	0.029755	0.0236069	0.0246339	0.0298745	0.0395564	0.0417271	0.051752	0.0605216	0.0654559	0.0743597	0.0899132	0.0884551	0.0865611	0.0662616	0.0447009	0.0381612	0.040392	0.0324785	0.0384955	0.0375175	0.0345255	0.0333332	0.02707	0.0242792	0.0226411	0.0227602	0.0181106	0.011346	0.00658366	0.00558606	0.00870073	0.00616634
aha_iaa	0.00701092	0.00739545	0.00651936	0.00369069	0.00780721	0.0118262	0.00718162	0.00563292	0.0129408	0.008649	0.0124458	0.0112868	0.0208452	0.0254624	0.0396255	0.0518357	0.0604145	0.0666739	0.0755962	0.0792262	0.0721825	0.0632083	0.0563992	0.0532186	0.0446788	0.0438801	0.0329077	0.0331727	0.0244405	0.0220183	0.023341	0.00977034	0.0159389	0.0122914	0.0024393	0.00089185	-0.00148473	-0.00188754	-0.00423713	-0.0105523	-0.0071547
aha_iaa	0.00453312	0.00529163	0.00596588	0.00663168	0.00463533	0.00505882	0.0042457	0.00143775	0.00191267	-0.00411276	-0.00637214	-0.00546156	-0.00451797	0.00345031	0.0148945	0.0204763	0.0276946	0.0285928	0.0330346	0.0340112	0.0240209	0.0246716	0.0164651	0.00527635	-0.00103791	-0.0021471	0.00261525	-0.00459955	-0.00484773	-0.00446011	-0.00579098	-0.00877643	-0.00668414	-0.0126488	-0.0145869	-0.0175824	-0.0213584	-0.022207	-0.0236322	-0.0275758	-0.0277167
aha_iaa	0.00636873	0.00610366	0.0128994	0.0127063	0.0165723	0.0188863	0.0192462	0.0212521	0.0256948	0.0281153	0.031521	0.0319481	0.0306308	0.024175	0.0149103	0.00549254	-0.00579661	-0.0140455	-0.0162508	-0.0213459	-0.019059	-0.0184424	-0.0161379	-0.0177564	-0.021725	-0.0195443	-0.0188414	-0.0165377	-0.0140681	-0.009897	-0.00490816	-0.00329434	0.00499655	0.00963595	0.0145348	0.0167346	0.0202476	0.0253313	0.0279362	0.0295307	0.0226724
aha_iaa	0.0108584	0.0148555	0.0136018	0.0198678	0.026161	0.0295267	0.0347615	0.0301926	0.0284611	0.0340458	0.0369108	0.0358287	0.0257573	0.0174953	0.0127188	0.00420798	-0.0165396	-0.0260465	-0.0349533	-0.0307911	-0.0343717	-0.0389189	-0.0324134	-0.0309746	-0.0308487	-0.0308124	-0.028618	-0.0191428	-0.00851653	-0.00402945	0.00412725	0.00422219	0.0033476	0.0204247	0.0251579	0.0360828	0.0388254	0.0388717	0.0375818	0.0363161	0.0334
aha_iaa	0.00370134	-0.00147679	0.0104266	0.00491345	0.00850532	0.0164371	0.0127287	0.00200511	0.00667177	0.00928594	0.0141678	0.0164383	0.0099721	0.0145416	0.0167691	0.00983065	0.00725143	-0.0028157	-0.00545764	-0.00400238	-0.00658401	-0.0102656	-0.0121142	-0.0158617	-0.0127301	-0.010635	-0.0155789	-0.00911826	-0.0139065	-0.0125093	-0.00830133	-0.00916229	-0.00937858	-0.005917	-0.00403626	0.000291265	0.00189633	0.00152837	0.00112369	0.00476233	0.00346687
aha_iaa	-0.0028513	-0.00232535	0.000637106	0.00451946	0.00756671	0.00913127	0.00939836	0.00848629	0.0113995	0.0158192	0.0137903	0.0205261	0.0231067	0.029338	0.0402832	0.0542332	0.0536234	0.0566548	0.0546096	0.055947	0.0522274	0.0522891	0.0518582	0.0408555	0.0430073	0.0422176	0.0387426	0.0318997	0.0316562	0.0306877	0.0246304	0.025838	0.0226444	0.0230649	0.0164604	0.0135971	0.0189582	0.00916874	0.0121543	0.00364332	0.00462705
aha_iaa	0.0232422	0.022651	0.032181	0.0249096	0.0174721	0.017386	0.0160803	0.0277827	0.0425032	0.0496003	0.0436074	0.0517842	0.0622591	0.0732975	0.0786225	0.0856054	0.102814	0.11085	0.110622	0.104774	0.0920496	0.0807191	0.0806355	0.0757276	0.0638437	0.0635441	0.0580179	0.0545621	0.0476092	0.0398425	0.0437911	0.0346147	0.0289251	0.0227583	0.0186435	0.0194113	0.0138918	0.0148123	0.0117618	0.0115991	0.00840376
aha_iaa	0.00434858	0.00745161	0.0133029	0.00489016	0.0138585	0.0184415	0.0170308	0.0266829	0.0340743	0.0357913	0.0328226	0.0430031	0.0436139	0.0593052	0.0580286	0.0546486	0.0624607	0.0599569	0.0607072	0.068409	0.0636019	0.0678914	0.0626293	0.0575584	0.0551736	0.0512363	0.0460831	0.0455015	0.0417174	0.0382911	0.038624	0.0311208	0.0311026	0.0284853	0.0221541	0.0127	0.0103428	0.00885421	0.00666371	-0.00367219	-0.00881786
aha_iaa	0.000336981	0.00339276	0.0041199	0.0138631	0.0187055	0.0205629	0.0256603	0.0261603	0.0350663	0.0339193	0.0327435	0.0361176	0.0413441	0.0443506	0.0416434	0.0339432	0.0272804	0.0232579	0.0109103	0.00910503	0.00782844	0.00679995	0.0126556	0.0132745	0.00947243	0.00768471	0.00650299	0.00691985	0.00616341	0.000118431	0.0073673	0.0113684	0.00654502	0.00906763	0.0112526	0.0156096	0.00941264	0.0114851	0.00883559	0.00981295	0.00859173
aha_iaa	-0.0223695	-0.0166758	-0.0135878	-0.0148017	-0.00458127	-0.00311234	-0.00371582	0.00114201	0.0122576	0.0112968	0.0163805	0.019502	0.0208022	0.0203886	0.0167649	0.0133498	-0.00144427	-0.0067931	-0.0100779	-0.00468451	-0.00378097	-0.00108195	0.00103421	-0.000777441	0.00443003	0.00360716	0.00820322	0.014415	0.0110628	0.0199082	0.0177243	0.0153074	0.0172785	0.0230269	0.0241866	0.0158281	0.024968	0.0220205	0.0135542	0.0223508	0.0171913
aha_iaa	-0.00739142	-0.00637633	-0.00398828	-0.000705878	0.00296863	0.00908518	0.00995788	0.0126591	0.0148603	0.0218491	0.026996	0.0359763	0.042248	0.0499809	0.0460301	0.0464968	0.0320408	0.020406	0.0140802	0.0122046	0.0108706	0.00353427	0.00775919	0.00418386	0.00474949	0.00100144	-0.00408927	-0.00388283	-0.0073888	-0.00310613	-0.00196273	-0.00193841	0.000367408	4.1e-05	0.00492545	0.00792065	0.0087141	0.00684525	0.0056934	-0.000689162	0.00286091
aha_iaa	0.00389728	0.0153823	0.0183841	0.0260103	0.0302791	0.0386338	0.0456179	0.0490852	0.0521161	0.0583539	0.0623667	0.0702927	0.0829578	0.0869897	0.0937872	0.0955725	0.0904113	0.0830427	0.0727229	0.0695594	0.0667712	0.053827	0.0507407	0.0441822	0.0404853	0.037772	0.0309627	0.0240966	0.0196617	0.00983817	0.00795313	0.00638862	0.0057661	0.00172863	-0.00257235	0.000140969	0.00283517	0.00520442	0.00860137	0.00666233	0.00768971
aha_iaa	-0.0206867	-0.0189787	-0.0194855	-0.0206114	-0.016808	-0.0157614	-0.0151624	-0.0101861	-0.00640704	0.00393349	0.00601511	0.00540445	0.0022772	0.00521186	-0.0033253	-0.0131366	-0.0272267	-0.0288042	-0.0222332	-0.0106912	-0.00420271	0.00337256	0.00475352	0.0118657	0.0174422	0.0235241	0.0333813	0.0343274	0.0397238	0.0382298	0.0418532	0.0409003	0.0430382	0.0395458	0.0362521	0.0370524	0.0418687	0.0406706	0.0389336	0.0414583	0.0368887
aha_iaa	-0.0266945	-0.0274661	-0.0220619	-0.0221082	-0.0164564	-0.0083934	0.00313285	0.00599025	0.0127027	0.0118188	0.00149227	-0.00807279	-0.0124996	-0.0237504	-0.0299596	-0.0336525	-0.0382132	-0.030594	-0.0234758	-0.013101	-0.0116133	-0.00511717	0.000859663	0.0156223	0.0142087	0.0207527	0.0243967	0.0226558	0.0286571	0.0307663	0.0332897	0.0344568	0.042799	0.0372233	0.0337752	0.0385222	0.0340729	0.0296091	0.0153194	0.0244774	0.0232901
aha_iaa	-0.0279434	-0.0275243	-0.0224947	-0.0293254	-0.0242506	-0.0178461	-0.0133433	-0.00320591	0.00464116	0.011921	0.0180343	0.026436	0.0294964	0.0267356	0.0239923	0.0119343	0.00209055	-0.00785108	-0.00885685	-0.00529022	0.000552182	0.00449667	0.01052	0.0165642	0.0181402	0.0193472	0.0189141	0.0209803	0.0236141	0.0160106	0.0215181	0.0204034	0.0225418	0.0201031	0.0204935	0.0192588	0.0199117	0.0194141	0.0151209	0.0152445	0.0116901
aha_iaa	-0.0154728	-0.0146013	-0.00683439	-0.00414374	0.000508103	0.0114045	0.0129094	0.0220443	0.0418483	0.0533314	0.0572367	0.0600439	0.0591141	0.0589049	0.0427246	0.0296482	0.0218857	0.0130142	0.00784105	0.0100522	0.0125949	0.0138045	0.0108237	0.0160995	0.0216984	0.0233306	0.0270396	0.0242204	0.0318397	0.034743	0.0388829	0.0388422	0.04253	0.0462502	0.0423838	0.040635	0.046441	0.0457339	0.0440072	0.0448998	0.0458872
aha_iaa	-0.0134884	-0.0166315	-0.0121119	-0.00724459	0.00354009	0.0120631	0.0202469	0.0402553	0.042748	0.0503819	0.0465716	0.0272756	0.0217494	0.0193772	0.00947147	0.00278017	-0.00819452	-0.0146276	-0.0261223	-0.0208381	-0.0226453	-0.0209707	-0.0144458	-0.0140327	-0.0119072	-0.0103582	-0.0110358	-0.00961333	-0.0072064	-0.00134334	0.00350069	0.00165673	0.00763317	0.0114377	0.0148216	0.00937698	0.0136293	NA	NA	NA	NA
aha_iaa	-0.00991163	-0.0146572	-0.0152437	-0.0118588	-0.00450898	-0.00369657	0.00091443	0.00694503	0.0117358	0.0158358	0.0193213	0.031621	0.0452875	0.0515376	0.0559758	0.0534868	0.0517604	0.0464776	0.0437228	0.045561	0.0413842	0.0418491	0.0447594	0.0461211	0.0478202	0.056512	0.0544959	0.0543139	0.0523485	0.0519047	0.0490958	0.0473013	0.0471844	0.0448575	0.0438508	0.0421316	0.0347655	0.0313445	0.0248745	0.028683	0.0254505
aha_iaa	-0.0225988	-0.0216295	-0.0234127	-0.0183402	-0.0129344	-0.0112276	-0.002802	-0.000362614	0.0109624	0.0179637	0.0157773	0.0126685	0.00761099	0.00456562	-0.00273241	-0.00625955	-0.0116299	-0.0148982	-0.0188468	-0.0173189	-0.0158062	-0.00930863	-0.0065878	-0.00333934	0.0135139	0.00783512	0.0144195	0.012639	0.0164442	0.0212322	0.0223529	0.0206175	0.0277421	0.00762164	0.0260668	0.025737	0.0230244	0.0244248	0.0170094	0.0158581	0.0217043
aha_iaa	-0.0227133	-0.0219056	-0.0140308	-0.0121624	-0.00741463	0.000309726	0.0124333	0.0186647	0.0337708	0.0237344	0.0114366	0.00368767	-0.00250325	-0.00780316	-0.0148733	-0.0270591	-0.0334067	-0.0375764	-0.0363034	-0.029127	-0.0215568	-0.0278713	-0.020343	-0.0145513	-0.0109842	-0.00212342	-0.00461926	0.00414068	0.00441007	0.0108686	0.0172492	0.0194859	0.0227467	0.0214628	0.0224318	0.0288909	0.0281467	0.0198996	0.0122734	0.00594897	0.0133093
pp2c_iaa	0.142732	0.137654	0.104708	0.117834	0.123251	0.136352	0.149837	0.161243	0.161737	0.164291	0.164702	0.174174	0.183225	0.193381	0.207927	0.222485	0.237043	0.246741	0.254377	0.252683	0.235516	0.213334	0.198851	0.175859	0.163122	0.154344	0.141747	0.12728	0.12971	0.117579	0.120703	0.122173	0.120532	0.128591	0.122797	0.130641	0.134782	0.136892	0.142176	0.148895	0.152494
pp2c_iaa	0.0811422	0.0804355	0.079455	0.0763969	0.0768105	0.0720898	0.073931	0.0776458	0.0834012	0.0864153	0.0913635	0.104195	0.113343	0.122257	0.13301	0.142887	0.149375	0.141601	0.134202	0.117194	0.0950732	0.0742392	0.0637661	0.0514362	0.0481509	0.0513128	0.0551019	0.0635178	0.0659532	0.0701655	0.0781682	0.0799568	0.0822754	0.0900244	0.0997572	0.102382	0.110364	0.110348	0.109975	0.11112	0.124461
pp2c_iaa	0.125213	0.125926	0.12436	0.130249	0.131254	0.134296	0.130514	0.138332	0.14149	0.147034	0.15477	0.156111	0.167306	0.176594	0.180282	0.193036	0.182927	0.190521	0.197996	0.199707	0.199841	0.199378	0.198237	0.201631	0.192665	0.19959	0.197093	0.198281	0.195537	0.199046	0.197606	0.199371	0.196106	0.195245	0.188016	0.185144	0.1806	0.184027	0.189186	0.184168	0.185535
pp2c_iaa	0.164325	0.165374	0.166656	0.171969	0.178887	0.174535	0.180098	0.184901	0.178709	0.180004	0.187238	0.188915	0.180688	0.184241	0.236639	0.23935	0.23341	0.222296	0.202273	0.182036	0.179779	0.165113	0.158307	0.154635	0.152304	0.147317	0.153614	0.15818	0.160898	0.168447	0.176232	0.178316	0.174159	0.177188	0.181545	0.182064	0.184266	0.193121	0.195408	0.19456	0.198119
pp2c_iaa	0.115771	0.119547	0.113201	0.115251	0.115239	0.112644	0.111736	0.115665	0.120619	0.125965	0.125237	0.132485	0.131722	0.138062	0.151324	0.157143	0.158072	0.158413	0.154975	0.14	0.126459	0.0987005	0.0788888	0.0725702	0.0618211	0.0646121	0.0601469	0.0633893	0.0523895	0.0612141	0.0652314	0.0667166	0.0729103	0.0738037	0.0810027	0.0807402	0.0827512	0.0890618	0.0971379	0.103686	0.112148
pp2c_iaa	0.161752	0.163085	0.1654	0.167689	0.169244	0.158807	0.169904	0.184636	0.193303	0.192485	0.197776	0.195779	0.195019	0.184803	0.186593	0.179618	0.192076	0.204994	0.220663	0.220502	0.216722	0.214154	0.20832	0.19927	0.18956	0.190713	0.179729	0.183277	0.174524	0.181894	0.188812	0.184754	0.188255	0.183444	0.175419	0.1785	0.179096	0.185116	0.186079	0.183998	0.185383
pp2c_iaa	0.145335	0.143795	0.14421	0.152462	0.157633	0.159922	0.160534	0.169106	0.169062	0.169305	0.178052	0.185042	0.191188	0.191962	0.194303	0.206101	0.209253	0.227186	0.219029	0.21331	0.204293	0.189235	0.163951	0.147616	0.129056	0.120159	0.119047	0.118102	0.106062	0.10537	0.0990123	0.0977611	0.10309	0.101289	0.102646	0.105705	0.109597	0.117414	0.118963	0.120719	0.121648
pp2c_iaa	0.00742548	0.00594711	0.00429528	0.0112438	0.0113813	0.0136221	0.0187925	0.0283998	0.0300951	0.0287912	0.0315552	0.0299362	0.0464078	0.0517442	0.0561312	0.0523358	0.0442333	0.0459691	0.040057	0.033758	0.0176828	0.00728345	0.00795128	-0.00851385	-0.00861696	-0.0107679	-0.0192107	-0.0184135	-0.0159278	-0.0203201	-0.0181192	-0.0150703	-0.0136033	-0.0168885	-0.0186802	-0.0151023	-0.0148067	-0.0134017	-0.0148191	-0.0112983	-0.0128857
pp2c_iaa	-0.0346962	-0.0360131	-0.040289	-0.0478016	-0.0507898	-0.054926	-0.0625564	-0.0663756	-0.0734596	-0.074829	-0.0718536	-0.0656687	-0.062147	-0.0625984	-0.0583954	-0.0584231	-0.0577719	-0.056647	-0.0561192	-0.0490155	-0.0413969	-0.0286368	-0.0142846	0.00350965	0.0313799	0.0466249	0.0594416	0.0643562	0.0660959	0.0680304	0.0750493	0.0733069	0.0718619	0.0652921	0.0614791	0.0615753	0.0570022	0.0596127	0.0527435	0.0534265	0.0458955
pp2c_iaa	-0.0063094	-0.00271709	-0.00757048	-0.00620525	-0.0076967	-0.00108966	0.00488782	0.00662729	0.0149352	0.0121251	0.0149687	0.0208843	0.0240432	0.0249229	0.0338875	0.048444	0.0498555	0.058891	0.0743961	0.08802	0.0896341	0.094184	0.101011	0.111396	0.12109	0.119659	0.123499	0.117208	0.11454	0.113546	0.104736	0.103562	0.100198	0.0945958	0.0776099	0.0755177	0.0690299	0.0742068	0.0708731	0.066597	0.0679106
pp2c_iaa	-0.004064	-0.00133789	-0.00634926	-0.0022612	-0.00116892	0.00591892	0.00866419	0.0142843	0.0243304	0.0294555	0.033176	0.0306213	0.0397583	0.0404565	0.0408693	0.0406702	0.0287589	0.0538878	0.058265	0.0745332	0.0884115	0.101329	0.116545	0.119124	0.123755	0.135004	0.144306	0.148294	0.140515	0.144546	0.136986	0.132656	0.119751	0.11499	0.115799	0.116391	0.111802	0.105906	0.102124	0.0951491	0.0938522
pp2c_iaa	0.010049	0.0148676	0.0162085	0.0164602	0.0163444	0.0169537	0.0150535	0.00891872	0.0103833	0.0164875	0.0201887	0.0238512	0.0339318	0.0284006	0.0338361	0.0364595	0.0486496	0.059742	0.0652256	0.0802468	0.0849722	0.0936572	0.0824264	0.0884064	0.0982687	0.103101	0.105027	0.099402	0.0908792	0.0872656	0.0933511	0.0801393	0.0734231	0.0688243	0.0726884	0.0699196	0.0706062	0.0702033	0.0677757	0.0621921	0.0568502
pp2c_iaa	-0.0308334	-0.0359015	-0.0438265	-0.0485956	-0.048563	-0.0530409	-0.0557616	-0.0545348	-0.0562987	-0.0528423	-0.0486158	-0.0455638	-0.0406284	-0.0381887	-0.0393534	-0.0321701	-0.0327316	-0.0274888	-0.0208159	-0.0227541	-0.0102709	-0.0067427	0.0106121	0.024203	0.0505124	0.0543801	0.0612612	0.0612369	0.0661611	0.0610453	0.060456	0.0595411	0.0468121	0.0415079	0.0306381	0.0232323	0.0155455	0.0161738	0.00577749	0.000196609	0.000813251
pp2c_iaa	0.0322535	0.0344082	0.0443745	0.0501429	0.0571838	0.0658229	0.0660593	0.0758708	0.0589293	0.0578919	0.0676032	0.0890478	0.115192	0.125385	0.135099	0.134746	0.13801	0.144268	0.150511	0.153988	0.150879	0.156063	0.152394	0.154814	0.157459	0.150712	0.153598	0.147839	0.144819	0.140328	0.13552	0.129915	0.12044	0.1138	0.10897	0.107788	0.100613	0.0993299	0.0899617	0.0916101	0.0897387
pp2c_iaa	-0.0357955	-0.0442578	-0.0527305	-0.0523405	-0.0581003	-0.0590042	-0.0620967	-0.0629421	-0.0587138	-0.0644282	-0.0588454	-0.0592147	-0.0565606	-0.0559927	-0.0529323	-0.0488174	-0.0533411	-0.0476265	-0.0410313	-0.0347895	-0.0283903	-0.0284315	-0.0227634	-0.0143418	-0.00752884	0.000886912	0.00417065	0.00438304	0.00918884	0.0136309	0.0139158	0.0104735	0.0136331	0.00848912	0.0165085	0.0181088	0.0190366	0.0240373	0.0257484	0.0211416	0.0246536
pp2c_iaa	0.00635288	0.0117148	0.00661657	0.00399058	0.00482013	0.00856237	0.0147495	0.0118808	0.0118906	0.014766	0.0210808	0.0209789	0.0222156	0.0182526	0.0167078	0.0203074	0.0251593	0.02501	0.0289321	0.0242799	0.016339	0.028251	0.0456137	0.0457933	0.0575013	0.0598438	0.0615724	0.0590412	0.0518954	0.044658	0.041475	0.0415249	0.0394273	0.0378069	0.0381236	0.0337659	0.0303345	0.0342103	0.0301826	0.0296203	0.027117
pp2c_iaa	0.0148753	0.012412	0.0233838	0.03246	0.0464498	0.0578353	0.0666355	0.0785197	0.0879432	0.0873157	0.0906187	0.10511	0.109257	0.105271	0.107309	0.111985	0.103113	0.08353	0.0809585	0.0843733	0.0911014	0.102012	0.10541	0.0976896	0.0986692	0.10895	0.113644	0.111898	0.116277	0.119092	0.121653	0.124562	0.130555	0.13251	0.130725	0.132572	0.128954	0.130765	0.136141	0.129472	0.135543
pp2c_iaa	-0.0404026	-0.0472105	-0.0441212	-0.0472836	-0.050772	-0.0444272	-0.0436766	-0.0431612	-0.0410243	-0.0408797	-0.0393672	-0.04068	-0.04383	-0.0469201	-0.0489865	-0.0487445	-0.0446916	-0.0457301	-0.0412986	-0.0322536	-0.0318873	-0.0181832	-0.00223952	0.0140133	0.041111	0.0661598	0.0837346	0.0952801	0.0973027	0.0973164	0.0982686	0.0939627	0.0940073	0.0849484	0.0846036	0.0855266	0.0787312	0.0765709	0.074483	0.0731415	0.0726371
pp2c_iaa	0.000509752	0.00171498	0.0125554	0.0196555	0.0118255	0.0150665	0.0184137	0.0240809	0.017434	0.0262303	0.038692	0.0414777	0.0609939	0.0736895	0.0764079	0.0888662	0.0970665	0.104915	0.105506	0.123045	0.11863	0.111121	0.101359	0.090861	0.0873882	0.0894519	0.0866696	0.087118	0.0873782	0.089404	0.0852046	0.0877615	0.0879515	0.0873825	0.0969703	0.0946294	0.0913795	0.0886691	0.0868695	0.0857513	0.0780082
pp2c_iaa	-0.000626164	0.00394192	0.00487155	0.0109547	0.0190608	0.0330997	0.0469604	0.0402433	0.0436926	0.0523598	0.0510404	0.0642877	0.0664715	0.0711248	0.0887621	0.102894	0.100004	0.10284	0.108628	0.1004	0.0984356	0.0868868	0.0767547	0.0741276	0.0751297	0.0639156	0.0626618	0.0659141	0.0678975	0.068145	0.0738879	0.0749049	0.0750025	0.0746093	0.0767595	0.0816464	0.0877423	0.0834652	0.0868708	0.0899747	0.0916503
pp2c_iaa	-0.00856404	-0.00964088	-0.0125528	-0.00802391	-0.00570151	-0.00233437	0.00508468	0.00960202	0.0195016	0.017427	0.0154338	0.0200375	0.0183154	0.019564	0.0316446	0.0239973	0.0209182	0.0263087	0.0260702	0.0335474	0.0403727	0.0411036	0.0392334	0.0304714	0.0315689	0.0268596	0.0327399	0.0376344	0.0455345	0.0455511	0.0465912	0.0551517	0.0644087	0.0669787	0.0652228	0.0688879	0.0757493	0.0803773	0.0871657	0.0866827	0.0912385
pp2c_iaa	0.0205398	0.0214333	0.0278186	0.0348394	0.0399213	0.0491667	0.0614707	0.0732093	0.0751918	0.0829769	0.0991416	0.1051	0.107871	0.110663	0.109739	0.115215	0.110152	0.112381	0.118232	0.124072	0.134198	0.138299	0.147573	0.158372	0.17066	0.170559	0.169137	0.163337	0.155211	0.142221	0.147421	0.145732	0.132615	0.127827	0.119942	0.113965	0.117049	0.117378	0.110409	0.113219	0.116368
pp2c_iaa	-0.0622518	-0.0609007	-0.0654926	-0.0627236	-0.0587298	-0.0590455	-0.0694697	-0.0697229	-0.0701051	-0.0570938	-0.0333566	-0.0286263	-0.0243128	-0.0261392	-0.026896	-0.0314041	-0.0449728	-0.0669902	-0.0766194	-0.0914965	-0.106366	-0.121981	-0.132323	-0.137756	-0.134363	-0.117801	-0.106891	-0.114031	-0.117994	-0.115932	-0.109373	-0.109122	-0.109189	-0.103689	-0.0900417	-0.0817422	-0.0741109	-0.0682298	-0.0584255	-0.0587423	-0.0536354
pp2c_iaa	-0.0130969	-0.00729123	-0.00346392	0.00365432	0.00732542	0.0103949	0.0138424	0.0119814	0.00436441	0.00368621	-0.00156219	0.00371787	0.0132993	-0.0160437	-0.0532095	-0.0514728	-0.0379496	-0.0454382	-0.0513039	-0.0510618	-0.0475582	-0.0552125	-0.0525796	-0.0522	-0.0506114	-0.0470546	-0.0484947	-0.0421878	-0.0406635	-0.0381551	-0.0308855	-0.0307492	-0.0319471	-0.0297915	-0.0369548	-0.0355923	-0.03139	-0.0313906	-0.0185973	-0.0202244	-0.0325845
pp2c_iaa	-0.0384868	-0.0330444	-0.0306364	-0.0435306	-0.0424673	-0.0472724	-0.0501451	-0.0513097	-0.0516069	-0.0476571	-0.0507056	-0.0645527	-0.0623523	-0.0727323	-0.0760927	-0.0875785	-0.0890525	-0.0856972	-0.0757044	-0.0720749	-0.0653269	-0.0455332	-0.0387255	-0.0182003	-0.00588779	0.0150726	0.0249668	0.0401284	0.0412232	0.0428958	0.0423465	0.0391293	0.0438496	0.0463314	0.0453671	0.0422447	0.0441115	0.046361	0.0428798	0.04144	0.0382549
pp2c_iaa	-0.00266537	0.00145334	-0.00391624	-0.00491726	0.00261158	0.00222341	0.00612905	0.00447673	0.00542822	0.00791144	0.011783	0.00868327	0.0110343	0.00663596	0.00319242	0.000162743	0.00144325	0.00061393	-0.000347049	0.00929719	0.0176024	0.0178739	0.0245462	0.0505224	0.0520765	0.0615874	0.0762309	0.0736683	0.0697144	0.072797	0.0672323	0.0632582	0.0687103	0.0653315	0.0612522	0.0552701	0.0571653	0.0544897	0.053867	0.0557072	0.0500539
pp2c_iaa	-0.022924	-0.0191034	-0.0172199	-0.0180127	-0.0153914	-0.0032791	-0.0036589	-0.00230745	-0.00999917	-0.0178783	-0.0159099	-0.00823674	0.00373336	0.017866	0.0283517	0.0383514	0.0366559	0.0323586	0.0347649	0.0263478	0.0243308	0.0220335	0.0123961	-0.00126206	-0.00828621	-0.0163544	-0.025213	-0.0373014	-0.0416541	-0.0479442	-0.0510784	-0.0531192	-0.0624544	-0.0627425	-0.0631952	-0.0633289	-0.0636808	-0.0620707	-0.0579768	-0.0557849	-0.0539324
pp2c_iaa	0.00126537	-0.00946299	-0.020127	-0.0397918	-0.0364923	-0.00382247	0.0221466	0.032563	0.0399388	0.0420542	0.0509529	0.0579991	0.0418419	0.0717397	0.0822186	0.0971506	0.0994184	0.0994497	0.101122	0.0972127	0.0913277	0.0901669	0.0848462	0.0868099	0.0851346	0.0857525	0.0812195	0.082385	0.0830763	0.0809895	0.085399	0.0878795	0.0966132	0.1007	0.108441	0.115035	0.118633	0.124749	0.130947	0.132488	0.135259
pp2c_iaa	-0.00197661	-1.63e-05	0.00130172	0.00315313	0.00814131	0.0169643	0.0256824	0.0292551	0.0302335	0.0227004	0.037564	0.0348756	0.067591	0.0798628	0.0910184	0.105908	0.120447	0.141929	0.150599	0.162571	0.174425	0.182666	0.186207	0.197892	0.203679	0.210934	0.208674	0.20226	0.194534	0.183221	0.186344	0.192586	0.182912	0.182838	0.181257	0.179465	0.181134	0.18309	0.18179	0.181234	0.181998
pp2c_iaa	0.0138577	0.0153435	0.0194559	0.0246274	0.0284639	0.0351428	0.0429678	0.0499929	0.0574735	0.0639922	0.0697833	0.0768973	0.0843777	0.0912375	0.103183	0.113709	0.119146	0.12854	0.134408	0.157365	0.156114	0.152428	0.141192	0.130687	0.144516	0.139146	0.137826	0.126077	0.118119	0.123182	0.118549	0.119045	0.118919	0.117992	0.119069	0.118354	0.123848	0.129956	0.129698	0.13331	0.13793
pp2c_iaa	-0.0353238	-0.0351026	-0.0370379	-0.0391602	-0.0412942	-0.0317027	-0.0176727	-0.0137942	-0.00554727	-0.00396126	0.00601617	0.00955994	0.0162113	0.0336878	0.0482489	0.0592899	0.0675957	0.0882469	0.102192	0.118427	0.129111	0.113573	0.115495	0.0901462	0.0967649	0.119889	0.122183	0.123305	0.122632	0.115517	0.123959	0.12074	0.119034	0.120309	0.128373	0.134522	0.137764	0.147574	0.153159	0.158309	0.160363
pp2c_iaa	-0.0461889	-0.0503501	-0.0542101	-0.0565949	-0.0521083	-0.0563302	-0.0499397	-0.0365782	-0.0322519	-0.0287086	-0.0245003	-0.0188741	-0.0102351	-0.0029038	0.00215233	0.000292336	-0.000266313	0.00964653	0.0198884	0.054231	0.0765473	0.0906464	0.0998014	0.109154	0.116606	0.122406	0.127642	0.13393	0.132589	0.134711	0.132721	0.139973	0.139223	0.133043	0.142409	0.138071	0.144	0.147396	0.149609	0.156279	0.154976
pp2c_iaa	0.0118973	0.0159237	0.0186409	0.0247718	0.0333825	0.0418013	0.0439874	0.0522531	0.0559464	0.0631626	0.0720632	0.0817903	0.090125	0.0956153	0.0938397	0.0907089	0.087012	0.0858558	0.0810146	0.0689923	0.0547271	0.0598244	0.050152	0.054573	0.0492528	0.054782	0.0564766	0.0664726	0.0717126	0.0824076	0.0855	0.0942226	0.101882	0.107944	0.115848	0.121829	0.119048	0.125917	0.133169	0.133971	0.135491
pp2c_iaa	-0.00283994	-0.00544306	-0.00318624	0.00459018	0.0112843	0.0105872	0.011611	0.0224574	0.0361775	0.0535587	0.0570782	0.0631286	0.0671319	0.0872419	0.0956841	0.103399	0.116686	0.128685	0.151879	0.157499	0.158504	0.168976	0.181258	0.18023	0.178131	0.184673	0.182322	0.173902	0.171009	0.168946	0.163506	0.158903	0.156435	0.152694	0.156307	0.153774	0.158298	0.159481	0.166444	0.167638	0.168147
pp2c_iaa	-0.0323567	-0.0362425	-0.0373996	-0.0475287	-0.0448379	-0.0388984	-0.0302329	-0.0228486	-0.0193386	-0.0163838	-0.00410424	0.00122751	0.0125486	0.0154994	0.0168424	0.0281045	0.041608	0.0512882	0.0699448	0.078915	0.0978048	0.10568	0.119991	0.129451	0.141911	0.161144	0.16412	0.165688	0.162877	0.167487	0.157552	0.159615	0.155967	0.147931	0.151067	0.145258	0.150724	0.154032	0.156584	0.158972	0.163324
pp2c_iaa	0.012153	0.017263	0.00981926	0.0177263	0.0209182	0.0291783	0.0324375	0.033978	0.0350164	0.0526182	0.0661376	0.0692359	0.0729558	0.0850239	0.092196	0.100764	0.105067	0.111627	0.112906	0.11638	0.12957	0.129174	0.13053	0.137375	0.139691	0.143232	0.145813	0.141928	0.144704	0.14621	0.148466	0.146999	0.145776	0.144337	0.148819	0.150207	0.15366	0.159659	0.160705	0.167698	0.169932
pp2c_iaa	0.000626804	0.00350414	-0.00336063	0.00240987	0.00933045	0.00842263	0.0102214	0.0171523	0.0153422	0.0193174	0.025504	0.0333309	0.0397741	0.049678	0.058201	0.0616853	0.072605	0.0880652	0.111537	0.116227	0.126988	0.137224	0.155132	0.169071	0.181798	0.162288	0.159524	0.190852	0.202997	0.211238	0.212541	0.215803	0.21185	0.204572	0.201266	0.191755	0.185482	0.189237	0.190581	0.19401	0.19329
pp2c_iaa	-0.030554	-0.0347892	-0.0449302	-0.0410982	-0.0357436	-0.0397248	-0.0380252	-0.0403724	-0.0350342	-0.031525	-0.0232316	-0.0185527	-0.0173689	-0.0139937	-0.00421707	0.00703331	0.0137936	0.0172472	0.0220444	0.0230922	0.0282558	0.0308073	0.0363252	0.0301565	0.0310715	0.0333448	0.0374466	0.0439792	0.0449928	0.047149	0.0586861	0.0601631	0.0645497	0.0692862	0.0699234	0.0769873	0.0811094	0.0899978	0.0941106	0.101826	0.105687
pp2c_iaa	-0.0181769	-0.0199053	-0.0156323	-0.0151583	-0.018607	-0.0120486	-0.0086265	-0.00161766	0.000705645	0.0103712	0.0114552	0.00582872	0.00843348	0.00597305	0.00879025	0.0122458	0.0194046	0.0182903	0.0240428	0.0320424	0.0404385	0.053999	0.0553372	0.0690615	0.0777881	0.0861125	0.0871675	0.0890782	0.0890595	0.0882386	0.0931078	0.100537	0.098067	0.106302	0.11172	0.111561	0.117489	0.121331	0.129118	0.136038	0.144607
