# Supplementary material for: The AUX1-AFB1-CNGC14 module establishes a longitudinal root surface pH profile
Source: eLife. 2023 Jul 14;12:e85193. doi: 10.7554/eLife.85193 (PMC10414970; doi:10.7554/eLife.85193)
Supplement: Figure 2—source data 1. [file elife-85193-fig2-data1.xlsx]

## Sheet: 2c
distance from root tip (µm)	0	20	40	60	80	100	120	140	160	180	200	220	240	260	280	300	320	340	360	380	400	420	440	460	480	500	520	540	560	580	600	620	640	660	680	700	720	740	760	780	800
Control	1.03098	1.02763	1.02687	1.02404	1.02932	1.01936	1.02226	1.02215	1.02334	1.02905	1.02237	1.0184	1.02496	1.03665	1.02722	1.02698	1.0352	1.02657	1.02226	1.02422	1.01932	1.01347	1.00057	0.987421	0.976276	0.961421	0.953338	0.938093	0.931766	0.913106	0.910402	0.897683	0.892914	0.893742	0.904219	0.897319	0.89511	0.893257	0.886787	0.89488	0.898701
Control	0.985418	0.984363	0.971064	0.972817	0.970325	0.982159	0.988038	0.987865	0.987411	0.992039	0.991173	1.00005	1.00434	1.00941	1.01537	1.01506	1.01517	1.01431	1.00809	1.00844	0.997419	0.985558	0.967058	0.960871	0.949372	0.943286	0.935379	0.927225	0.923185	0.911824	0.898238	0.88317	0.873251	0.869145	0.870278	0.869969	0.859397	0.852754	0.849156	0.845696	0.838576
Control	1.00289	1.0062	1.00157	1.00587	0.99401	0.970441	0.966904	0.974302	0.997939	1.01444	1.01138	1.01917	1.02636	1.02637	1.03124	1.0372	1.04149	1.0435	1.04221	1.04059	1.03075	1.01061	0.997953	0.975765	0.959822	0.949133	0.935965	0.925805	0.92025	0.907873	0.895634	0.889995	0.883598	0.878687	0.866767	0.85763	0.847579	0.843271	0.840804	0.83401	0.832598
Control	1.03011	1.03557	1.03697	1.04381	1.04601	1.05566	1.05752	1.05685	1.04434	1.04673	1.04273	1.03263	1.02396	1.01844	1.01362	1.04413	1.06689	1.07229	1.05886	1.05277	1.03588	1.02492	1.02089	1.00936	0.993945	0.987262	0.975476	0.96974	0.957172	0.945072	0.925416	0.912983	0.9047	0.901633	0.892282	0.885192	0.888628	0.885463	0.874387	0.865349	0.865227
Control	1.01103	1.00693	1.00725	1.01178	1.00964	1.01425	1.01677	1.02259	1.01573	0.993137	0.978649	0.990337	0.996577	1.00988	1.0148	1.0177	1.00952	0.987692	1.00289	1.0079	1.00292	1.01341	1.01409	0.993961	0.980174	0.969114	0.95228	0.94048	0.929376	0.925303	0.91505	0.909301	0.903084	0.898219	0.882608	0.874393	0.861659	0.856645	0.860409	0.859132	0.850147
Control	1.01614	1.01156	1.0124	1.01237	1.01174	1.01291	1.01467	1.01852	1.01935	1.02076	1.01752	1.01392	1.01835	1.02278	1.02899	1.0308	1.02261	1.0428	1.04791	1.04297	1.02817	1.00394	0.986561	0.982773	0.973276	0.969796	0.952298	0.93894	0.929567	0.912907	0.906969	0.903355	0.906379	0.892035	0.893089	0.884671	0.876766	0.87649	0.868806	0.871746	0.868648
Control	0.986086	0.988199	0.988004	0.987177	0.98406	0.98658	0.985248	0.986904	0.982332	0.980282	0.98287	0.985565	0.988787	0.99036	0.996839	1.00295	1.00965	1.01937	1.02063	1.02339	1.02873	1.03251	1.02807	1.01241	1.00417	0.985859	0.974863	0.96287	0.953116	0.942243	0.934267	0.931153	0.910021	0.906003	0.900493	0.890204	0.876112	0.863468	0.861211	0.851272	0.841218
Control	0.986644	0.95682	0.991202	0.985534	0.99279	1.00321	0.999151	1.00027	0.997896	0.985465	0.984232	0.974482	0.964574	0.970176	0.97857	0.99447	1.00122	1.00225	0.997136	0.993438	0.985723	0.980879	0.97772	0.965538	0.948252	0.937936	0.927297	0.920419	0.905147	0.907322	0.894215	0.882887	0.881879	0.884967	0.881917	0.872982	0.876201	0.874884	0.868174	0.868444	0.867632
Control	0.969211	0.97119	0.971149	0.969616	0.96106	0.974549	0.985723	0.987344	0.974251	0.987036	0.989338	0.997341	1.00245	1.00782	1.00838	1.01	1.02141	1.02603	1.01469	1.0081	0.992208	0.979926	0.961187	0.947293	0.934646	0.928501	0.905315	0.862993	0.889945	0.897027	0.889696	0.882094	0.876481	0.874242	0.864279	0.866369	0.857844	0.855879	0.853307	0.845678	0.837352
Control	0.985175	0.990649	0.984301	0.979997	0.981165	0.980208	0.977919	0.98629	0.988921	0.986618	0.981898	0.984317	0.990063	0.98963	0.987042	0.973988	0.971288	0.989024	0.990053	0.986488	0.972154	0.97421	0.9657	0.95084	0.941823	0.931217	0.92194	0.912559	0.900825	0.896563	0.892348	0.880733	0.878501	0.879113	0.873257	0.865508	0.859371	0.854346	0.843657	0.842358	0.842588
Control	1.01005	1.01798	1.0147	1.00785	0.990073	1.00485	0.997614	1.01462	1.01385	1.01137	1.01991	1.01664	1.01751	1.01319	1.0171	1.02117	1.03464	1.03237	1.03301	1.02634	1.0214	1.01169	1.00178	1.00244	0.995434	0.974072	0.964258	0.944019	0.929515	0.914499	0.91201	0.904261	0.890625	0.886802	0.880062	0.876436	0.875736	0.871449	0.866654	0.865453	0.864086
Control	1.01523	1.02808	1.02518	1.02777	1.02828	1.03569	1.03919	1.03631	1.03055	1.02237	1.01789	1.01771	1.01619	1.02532	1.01917	1.01171	1.01977	1.0294	1.02618	1.02271	1.01665	1.01027	0.98838	0.980856	0.97376	0.964687	0.956106	0.95333	0.937218	0.921433	0.918345	0.914687	0.911413	0.902425	0.89883	0.890748	0.889725	0.884368	0.881531	0.867025	0.864332
Control	1.00929	1.01678	1.00934	1.01386	1.01813	1.02142	1.02053	1.01522	1.01655	1.02517	1.02002	1.02393	1.02081	1.02602	1.02491	1.02039	1.01626	1.00812	1.00173	1.00205	0.985077	0.971448	0.959332	0.945355	0.941969	0.938831	0.932692	0.925833	0.923485	0.911901	0.911129	0.909031	0.901391	0.901862	0.90006	0.896597	0.893064	0.896094	0.891799	0.88587	0.884303
Control	0.989885	0.987793	0.994853	0.987575	0.99538	0.998462	0.990876	0.988244	0.982989	0.982939	0.98009	0.970499	0.989827	0.997554	0.995513	1.00029	0.998561	1.00231	0.997723	0.990584	0.980987	0.966693	0.952838	0.946249	0.939884	0.927089	0.91967	0.914465	0.909031	0.901221	0.896324	0.887073	0.877412	0.870362	0.867837	0.860679	0.855343	0.852941	0.845451	0.837912	0.827247
Control	0.989042	0.999388	0.993855	0.995658	0.993042	0.980752	0.955616	0.983532	0.990889	0.98669	0.984868	0.985718	0.989943	0.983666	0.988064	0.987899	0.985544	0.985097	0.972596	0.957829	0.961466	0.955095	0.938444	0.928572	0.922682	0.912297	0.904005	0.89963	0.892006	0.886546	0.87558	0.877445	0.873894	0.866513	0.861772	0.862475	0.860326	0.855524	0.848835	0.848307	0.848291
Control	0.959062	0.954535	0.955615	0.957017	0.954925	0.954781	0.959148	0.956144	0.965676	0.970582	0.974304	0.975466	0.987087	0.985548	0.982423	0.984501	0.982224	0.977301	0.964047	0.947431	0.92982	0.919946	0.90951	0.890821	0.886008	0.874246	0.856538	0.854022	0.85094	0.849453	0.847217	0.840787	0.835864	0.828443	0.825375	0.823375	0.823366	0.822057	0.822901	0.8228	0.823574
Control	1.01298	1.01335	1.00957	1.01366	1.01831	1.01371	1.01196	1.01086	1.00472	1.00087	1.00157	0.997489	0.998733	1.00452	1.01413	1.01978	1.02203	1.02279	1.02156	1.01804	1.01465	1.01111	0.998897	0.990472	0.971816	0.970748	0.968154	0.950629	0.940462	0.935671	0.921206	0.920369	0.911986	0.90657	0.895666	0.895245	0.886345	0.876167	0.877339	0.875783	0.869671
Control	1.01077	1.00873	1.00742	1.0119	1.01451	1.02098	1.02513	1.00875	1.0124	1.00441	1.01181	1.02096	1.02117	1.02683	1.03608	1.04263	1.0471	1.04206	1.02802	1.00508	0.984603	0.968621	0.957042	0.945664	0.937092	0.931952	0.92136	0.917069	0.906426	0.896532	0.894167	0.882047	0.881297	0.877345	0.874115	0.870767	0.865807	0.866704	0.862524	0.858918	0.866749
Control	1.01312	1.01312	1.0118	1.02894	1.04123	1.03513	1.06037	1.06979	1.05865	1.06225	1.06942	1.08002	1.08798	1.0993	1.11069	1.11758	1.11521	1.11389	1.10468	1.10247	1.07812	1.05875	1.05839	1.03809	1.0152	1.00252	0.997648	0.978862	0.963107	0.958145	0.944906	0.92996	0.919833	0.908261	0.889977	0.898687	0.893892	0.879455	0.879294	0.869528	0.858393
Control	0.995414	0.995414	0.995416	0.996256	1.01453	1.02	1.01508	1.01723	1.01677	1.03117	1.04119	1.04281	1.05498	1.06051	1.07785	1.08967	1.08863	1.08112	1.07406	1.05317	1.03192	1.00712	0.983118	0.972034	0.965039	0.949443	0.94649	0.934555	0.924769	0.913599	0.908646	0.911272	0.901002	0.895251	0.890689	0.883005	0.892319	0.882352	0.880031	0.880034	0.88219
Control	1.00645	1.00645	1.00345	1.00902	1.01949	1.02813	1.01299	0.96325	0.931309	0.95109	1.00779	1.02508	1.02203	1.00652	1.03359	1.05921	1.06809	1.0718	1.0743	1.08316	1.08517	1.08415	1.07486	1.05549	1.03528	1.04185	1.02591	1.0063	0.987257	0.979326	0.957492	0.943179	0.93847	0.926029	0.928404	0.921362	0.914662	0.906094	0.904892	0.895674	0.880101
Control	0.982029	0.982029	0.99533	0.990345	0.983642	1.00073	1.0139	1.01162	1.02687	1.03213	1.03387	1.03679	1.03667	1.04182	1.04659	1.05841	1.07072	1.08625	1.10143	1.10343	1.10125	1.10568	1.0975	1.07299	1.0535	1.05175	1.02664	1.0077	0.996507	0.977706	0.972492	0.955079	0.943472	0.942345	0.938668	0.930186	0.910341	0.90573	0.898964	0.890539	0.885844
Control	1.02772	1.02772	1.0255	1.02846	1.05125	1.0603	1.05687	1.04991	1.07563	1.09567	1.12046	1.12016	1.13056	1.12465	1.11683	1.11037	1.102	1.0971	1.08255	1.05915	1.0567	1.04309	1.01909	0.990577	0.974082	0.953516	0.931328	0.932176	0.928482	0.919924	0.903951	0.89852	0.887369	0.878468	0.878663	0.873206	0.872018	0.861079	0.857919	0.862622	0.852646
Control	0.997461	0.997461	1.00965	1.00625	1.00998	1.01353	1.03148	1.02756	1.02592	1.03275	1.03653	1.04836	1.04722	1.0587	1.05538	1.07539	1.09755	1.12081	1.12306	1.13158	1.13286	1.12026	1.11415	1.10565	1.08895	1.08004	1.05536	1.04591	1.02998	1.00211	0.978548	0.971754	0.955869	0.944897	0.927077	0.911533	0.902439	0.892215	0.881697	0.870109	0.866777
Control	1.00431	1.00431	1.0101	1.01763	1.0189	1.01849	1.02848	1.03996	1.03645	1.03195	1.03371	1.03772	1.02325	1.04868	1.06757	1.07862	1.08806	1.10205	1.10621	1.10133	1.08702	1.08249	1.04568	1.00841	1.05725	1.08255	1.07981	1.05163	1.03775	1.01803	0.995345	0.989139	0.983822	0.967379	0.954195	0.938571	0.925124	0.905986	0.898129	0.880593	0.860039
Control	1.00232	1.00232	1.00499	0.992296	1.01143	1.02732	1.02461	1.03116	1.03012	1.03623	1.04788	1.04702	1.05609	1.05325	1.06297	1.06751	1.08394	1.08364	1.08921	1.08719	1.07586	1.06737	1.05705	1.05281	1.01808	0.989421	0.984774	0.968855	0.95454	0.940219	0.934265	0.93476	0.928085	0.918885	0.906492	0.893048	0.891904	0.884844	0.874058	0.873102	0.88356
Control	1.0005	1.0005	1.0039	1.00015	1.01069	1.00526	0.99932	0.991559	0.987309	0.967915	0.962494	0.972019	1.00509	1.02493	1.04764	1.06827	1.0847	1.08266	1.09916	1.09767	1.10323	1.10591	1.11558	1.11325	1.09483	1.06178	1.05321	1.04787	1.02696	0.995733	0.98755	0.974528	0.956449	0.952654	0.939819	0.934	0.915283	0.907631	0.901871	0.894304	0.891632
Control	0.985488	0.985488	0.978231	0.95765	0.910504	0.945389	0.997638	1.00039	1.01647	1.02572	1.0394	1.04656	1.04835	1.05524	1.06422	1.07055	1.06776	1.07154	1.05771	1.03114	1.01174	1.00435	0.981881	0.968134	0.969727	0.956239	0.93992	0.935181	0.924055	0.907084	0.906457	0.897591	0.896689	0.896742	0.887649	0.884747	0.878969	0.875665	0.871118	0.860313	0.863173
Control	0.990766	0.990766	1.00081	1.00692	1.00863	1.00901	1.03405	1.04057	1.04656	1.05486	1.04918	1.05515	1.07352	1.08182	1.08895	1.09706	1.11051	1.12493	1.1227	1.14267	1.13828	1.13017	1.10858	1.09331	1.07555	1.05458	1.03161	1.01962	1.00658	0.982618	0.982522	0.968256	0.933553	0.922365	0.9083	0.903082	0.90157	0.901323	0.903865	0.917766	0.909394
Control	0.990821	0.990821	1.00078	1.00489	1.01837	1.02177	1.02098	1.02182	1.03225	1.04975	1.05002	1.04991	1.05711	1.05694	1.07474	1.08543	1.09587	1.10855	1.11663	1.12816	1.14869	1.15557	1.14659	1.13981	1.125	1.1143	1.0901	1.0791	1.05716	1.02903	1.02257	1.01316	0.985729	0.970858	0.96305	0.955371	0.941952	0.921798	0.90942	0.902006	0.874403
Control	0.994962	0.994962	1.01048	1.02568	1.02785	1.03229	0.971924	0.885091	0.914425	0.969771	1.02928	1.06537	1.05364	1.06151	1.05622	1.06404	1.07808	1.07887	1.08359	1.09743	1.09473	1.09861	1.09004	1.06887	1.03716	1.01748	1.00246	0.981554	0.976232	0.959988	0.94829	0.931074	0.937691	0.926337	0.918493	0.907474	0.898435	0.891444	0.881607	0.877441	0.866989
Control	1.00151	1.00151	0.993647	1.00867	1.0148	1.03087	1.03829	1.01431	1.03076	1.03311	1.04222	1.04232	1.06402	1.0688	1.08411	1.09692	1.1005	1.10448	1.10005	1.10472	1.10402	1.08281	1.05814	1.04428	1.0257	1.00153	0.976295	0.973263	0.957183	0.926286	0.919282	0.922282	0.916692	0.902813	0.894308	0.880086	0.880826	0.875937	0.87212	0.875538	0.867301
Control	1.00712	1.00712	1.0009	1.00308	1.00875	1.03884	1.03816	1.04049	1.04654	1.04097	1.05083	1.0667	1.08053	1.06849	1.06696	1.06591	1.07286	1.10268	1.09097	1.1176	1.10078	1.10277	1.08362	1.06235	1.04224	1.02318	1.00897	0.998272	0.978117	0.967327	0.947827	0.934177	0.927651	0.9209	0.907056	0.894549	0.889634	0.883714	0.881642	0.872208	0.862765
Fusicoccin 2µM	0.984033	0.971782	0.976889	0.980817	0.970991	0.975625	0.976726	0.97904	0.983124	0.982945	0.987794	0.993416	1.00139	0.993992	1.00131	1.01081	1.01492	1.02534	1.02871	1.02988	1.02676	1.01762	1.00545	0.994531	0.977509	0.971645	0.96622	0.960457	0.947208	0.936408	0.928854	0.916299	0.911274	0.900904	0.902926	0.896664	0.8927	0.891517	0.884038	0.876205	0.880793
Fusicoccin 2µM	0.93236	0.913769	0.911626	0.910427	0.913379	0.904797	0.911611	0.905534	0.911541	0.922487	0.921758	0.926903	0.948521	0.967167	0.97807	0.98268	0.976126	0.98339	0.980315	0.975162	0.964841	0.955141	0.940526	0.924826	0.910027	0.891359	0.875298	0.871963	0.862721	0.850282	0.849526	0.843125	0.83513	0.837165	0.836742	0.833181	0.831867	0.828471	0.821622	0.817658	0.817206
Fusicoccin 2µM	0.935423	0.916207	0.889113	0.892604	0.925563	0.938228	0.942581	0.948393	0.952209	0.974485	0.984364	0.996904	1.00945	1.01731	1.02857	1.04853	1.04204	1.04453	1.03057	1.01388	0.998231	0.98069	0.958753	0.945025	0.925828	0.901108	0.890056	0.876436	0.866042	0.864494	0.861376	0.857087	0.85314	0.852048	0.847893	0.847047	0.840789	0.843666	0.841037	0.837974	0.838473
Fusicoccin 2µM	0.949748	0.943382	0.935763	0.928181	0.914399	0.908472	0.908199	0.908341	0.906858	0.902018	0.904501	0.911244	0.913261	0.9287	0.937544	0.951628	0.968568	0.988206	0.998931	1.00024	1.01455	1.01227	1.0053	0.998593	0.988525	0.971986	0.965522	0.960618	0.952866	0.930502	0.920358	0.927321	0.918595	0.913094	0.911124	0.905577	0.905112	0.897857	0.890472	0.885892	0.878698
Fusicoccin 2µM	0.953391	0.949959	0.943025	0.941263	0.939288	0.930514	0.932863	0.931625	0.931717	0.930269	0.931744	0.942079	0.948309	0.959134	0.970707	0.988361	1.02855	1.0551	1.05904	1.06774	1.06167	1.06169	1.05512	1.03327	1.01163	1.00178	0.983451	0.968176	0.950547	0.93593	0.924648	0.918336	0.908351	0.896383	0.885217	0.880686	0.87608	0.880235	0.877046	0.872612	0.869074
Fusicoccin 2µM	0.960357	0.951964	0.947447	0.943503	0.938222	0.91947	0.91979	0.916838	0.921593	0.92722	0.934714	0.940857	0.958942	0.969981	0.983042	0.984094	0.989004	0.986863	0.980954	0.96458	0.958426	0.961597	0.948679	0.93188	0.922751	0.910237	0.905725	0.888085	0.880564	0.881719	0.880585	0.880649	0.875983	0.870884	0.865617	0.857967	0.856416	0.857518	0.853783	0.842291	0.841024
Fusicoccin 2µM	0.946843	0.939131	0.93641	0.930427	0.927043	0.923063	0.916345	0.920532	0.927049	0.936062	0.945799	0.951363	0.964948	0.973618	0.980635	0.989998	0.982071	0.975562	0.981443	0.972059	0.972525	0.967282	0.956293	0.949291	0.94155	0.936116	0.922438	0.907125	0.89578	0.886676	0.884881	0.874367	0.867063	0.86602	0.862867	0.857335	0.852626	0.845427	0.845514	0.844196	0.839807
Fusicoccin 2µM	0.9511	0.950227	0.945275	0.893856	0.881776	0.907241	0.930041	0.939333	0.945466	0.948122	0.960437	0.975618	0.978187	0.981135	0.98396	0.988381	0.988138	0.975662	0.966302	0.950279	0.940725	0.920216	0.91273	0.892352	0.885643	0.880337	0.875472	0.872663	0.871374	0.864553	0.860676	0.861921	0.859085	0.853019	0.854883	0.852134	0.849342	0.851498	0.850123	0.854087	0.859823
Fusicoccin 2µM	0.918824	0.914253	0.904758	0.899827	0.904749	0.903426	0.908598	0.91318	0.921412	0.933633	0.947459	0.954023	0.962537	0.972482	0.987481	0.987042	0.976172	0.980622	0.966561	0.953474	0.933838	0.916397	0.897151	0.89056	0.876764	0.859556	0.853721	0.842158	0.833172	0.83317	0.827448	0.828853	0.828698	0.819995	0.817768	0.813754	0.819127	0.817659	0.817416	0.817542	0.818029
Fusicoccin 2µM	0.940387	0.93489	0.928832	0.926002	0.920383	0.911365	0.907206	0.929157	0.940864	0.94267	0.956523	0.962292	0.971935	0.977854	0.998912	1.01614	1.0257	1.03286	1.01947	1.00524	0.986113	0.978473	0.971462	0.958113	0.946405	0.938401	0.927855	0.92224	0.913714	0.913728	0.904236	0.897941	0.892748	0.886362	0.869026	0.854586	0.854346	0.853888	0.854305	0.8585	0.85891
Fusicoccin 2µM	0.929474	0.928028	0.921569	0.92404	0.923122	0.916236	0.916354	0.91754	0.923926	0.934743	0.951963	0.956831	0.956363	0.983952	1.00045	1.01023	1.01665	1.02067	1.02773	1.01774	0.996801	0.981635	0.971115	0.954713	0.936087	0.923244	0.914366	0.90344	0.898384	0.883427	0.877716	0.868687	0.868238	0.86229	0.864152	0.860017	0.851585	0.847024	0.849168	0.853385	0.858136
Fusicoccin 2µM	0.926431	0.941648	0.93512	0.927752	0.917146	0.914552	0.913284	0.903864	0.915654	0.916488	0.914458	0.920016	0.932575	0.941348	0.958453	0.970524	0.98872	0.993982	1.00656	1.01104	1.01406	1.0062	0.987107	0.961712	0.952554	0.937905	0.925881	0.912884	0.896817	0.891606	0.886841	0.875607	0.863301	0.861365	0.853115	0.840028	0.83484	0.831208	0.831778	0.833973	0.825219
Fusicoccin 2µM	0.926647	0.923935	0.920879	0.917789	0.914875	0.916255	0.91652	0.920685	0.924753	0.933993	0.93122	0.936487	0.942332	0.948361	0.963369	0.977304	0.994097	1.00461	1.01613	1.02487	1.02778	1.03032	1.0235	1.00808	0.995415	0.980848	0.966792	0.964678	0.955756	0.939672	0.934655	0.927874	0.914116	0.906383	0.893902	0.885724	0.879611	0.870768	0.866169	0.860659	0.853216
Fusicoccin 2µM	0.961393	0.961384	0.956664	0.953217	0.945109	0.944854	0.948106	0.943913	0.939483	0.945095	0.949363	0.951054	0.960759	0.965896	0.971603	0.989399	1.00735	1.02122	1.03201	1.04353	1.05652	1.05813	1.05902	1.04934	1.03736	1.01801	0.996903	0.982847	0.966031	0.949428	0.937546	0.927828	0.916959	0.899708	0.884195	0.868348	0.858743	0.858943	0.84872	0.838293	0.830404
Fusicoccin 2µM	0.923892	0.91985	0.910972	0.908035	0.913761	0.920421	0.924726	0.933022	0.935517	0.941186	0.954289	0.962314	0.975793	0.988503	1.0023	1.01036	1.01499	1.02418	1.03831	1.03681	1.02418	1.00736	0.992983	0.982962	0.95913	0.946402	0.936362	0.930145	0.913712	0.903189	0.896732	0.887256	0.877186	0.870494	0.866663	0.857789	0.85182	0.841859	0.834049	0.828468	0.825917
Fusicoccin 2µM	0.946107	0.937095	0.928305	0.918889	0.919363	0.914708	0.882909	0.872926	0.875165	0.916873	0.934247	0.943583	0.953583	0.967464	0.982434	0.988447	1.0145	1.03469	1.04008	1.03883	1.03687	1.02495	1.02078	1.01982	1.00514	0.993566	0.990612	0.974384	0.95972	0.942359	0.928601	0.915468	0.90029	0.88419	0.873918	0.865801	0.863119	0.850717	0.840182	0.838472	0.829964
Fusicoccin 2µM	0.948358	0.946559	0.940702	0.925629	0.920571	0.918379	0.918383	0.935356	0.942584	0.943377	0.948252	0.956084	0.961544	0.968307	0.977704	0.985091	0.989246	0.998502	1.00546	1.00951	1.02431	1.03281	1.03015	1.04255	1.04365	1.0368	1.03014	1.02023	1.01677	1.00718	0.991049	0.971062	0.951502	0.940035	0.919769	0.904325	0.893721	0.878144	0.869976	0.865045	0.853332
Fusicoccin 2µM	0.977848	0.972322	0.969342	0.964345	0.957525	0.958907	0.949857	0.941614	0.943212	0.939063	0.944832	0.945554	0.954436	0.956876	0.961857	0.973492	0.984906	0.99543	1.00358	0.994331	0.987838	0.976252	0.962345	0.954756	0.945333	0.930471	0.916599	0.903392	0.89982	0.886227	0.867063	0.856738	0.847139	0.844802	0.838057	0.826665	0.827968	0.823445	0.817373	0.817202	0.814257
Fusicoccin 2µM	0.924572	0.908642	0.900545	0.884961	0.877298	0.883157	0.882701	0.88832	0.893249	0.901747	0.909884	0.926663	0.936607	0.937513	0.952705	0.961755	0.970878	0.980086	0.98224	0.979648	0.977023	0.959127	0.953298	0.949285	0.947499	0.935761	0.925751	0.922957	0.906511	0.906391	0.889863	0.873971	0.870946	0.862377	0.859001	0.850378	0.851101	0.849955	0.84591	0.845	0.829615
Fusicoccin 2µM	0.9491	0.947535	0.941201	0.931853	0.924937	0.918252	0.918527	0.92157	0.927737	0.93177	0.938515	0.947189	0.955761	0.958885	0.970067	0.977593	0.98633	0.984568	0.985165	0.978525	0.955808	0.929327	0.926494	0.925699	0.919609	0.906215	0.887498	0.8773	0.874162	0.866269	0.870339	0.864958	0.858844	0.857432	0.856929	0.852873	0.856564	0.858866	0.857088	0.851539	0.849893
Fusicoccin 2µM	0.928349	0.924324	0.899991	0.906952	0.911933	0.912866	0.915513	0.914741	0.923921	0.926859	0.933067	0.948723	0.968773	0.982711	0.991429	1.00791	1.01243	1.01656	1.01388	1.01667	1.01104	1.01299	1.00087	0.985456	0.975881	0.960993	0.949245	0.932458	0.921354	0.911461	0.903277	0.892901	0.881529	0.878453	0.870588	0.866398	0.858847	0.843078	0.83621	0.835114	0.845122
Fusicoccin 2µM	0.94434	0.948587	0.95103	0.957517	0.968117	0.971204	0.995149	1.00443	1.00065	1.02523	1.04748	1.05694	1.06505	1.04029	0.998345	1.04473	1.10001	1.09507	1.09162	1.07242	1.03144	1.01966	0.995616	0.974562	0.961779	0.943217	0.919593	0.896874	0.881664	0.875517	0.866509	0.851335	0.84277	0.839873	0.831338	0.828891	0.830443	0.827928	0.824677	0.822741	0.822028
Fusicoccin 2µM	0.891763	0.879112	0.878657	0.872287	0.876753	0.900044	0.922071	0.930561	0.932042	0.942955	0.973854	0.997062	1.00514	1.01294	1.01346	1.01915	1.0045	1.02075	1.0255	0.980427	0.88766	0.832141	0.902473	0.919531	0.880866	0.891798	0.87786	0.872806	0.86802	0.851345	0.841254	0.838978	0.836212	0.832704	0.826378	0.816907	0.827147	0.826975	0.829481	0.835221	0.832022
Fusicoccin 2µM	0.929353	0.912213	0.895342	0.918576	0.915449	0.92914	0.944654	0.952491	0.948639	0.959472	0.965117	0.921583	0.954056	1.00708	1.02304	1.0429	1.05023	1.05237	1.05254	1.03297	1.01719	1.00799	0.994779	0.969056	0.957754	0.943537	0.924312	0.913108	0.910938	0.905768	0.906867	0.893657	0.888657	0.869478	0.859103	0.849939	0.850067	0.834522	0.850145	0.863262	0.85579
Fusicoccin 2µM	0.89618	0.893624	0.899581	0.905619	0.888554	0.909045	0.923618	0.93597	0.950266	0.958	0.972255	0.981494	0.98851	1.0136	1.03125	1.03729	1.03934	1.03172	1.02384	1.01255	0.992296	0.978774	0.962511	0.933155	0.927465	0.915158	0.88949	0.882842	0.875463	0.869723	0.866611	0.862791	0.854756	0.850042	0.84008	0.837575	0.830334	0.827479	0.830303	0.830119	0.831263
Fusicoccin 2µM	0.90532	0.907077	0.900691	0.897766	0.896365	0.888699	0.898991	0.908618	0.908476	0.918275	0.935947	0.943792	0.958785	0.979367	0.988314	0.997778	1.00527	1.02017	1.03372	1.05073	1.0892	1.10059	1.10233	1.1078	1.08217	1.07192	1.07134	1.05616	1.03911	1.0058	0.973697	0.953871	0.957948	0.939832	0.913494	0.898401	0.872557	0.863539	0.850755	0.840787	0.836505
Fusicoccin 2µM	0.923454	0.927813	0.915367	0.900386	0.90402	0.893718	0.921151	0.931879	0.940735	0.948582	0.951011	0.968445	0.995973	1.02571	1.04652	1.06484	1.08129	1.09416	1.0938	1.08915	1.09979	1.10863	1.09204	1.08635	1.05646	1.02981	1.00712	0.984572	0.97007	0.94861	0.931586	0.917157	0.905677	0.900718	0.883255	0.865521	0.860671	0.859794	0.854745	0.854095	0.855635
Fusicoccin 2µM	0.969363	0.977498	0.981819	0.999586	0.999662	1.01026	1.01934	1.02717	1.02448	1.04566	1.06865	1.08693	1.10347	1.0939	1.08266	1.05189	1.04597	1.06188	1.06788	1.06761	1.03617	1.01267	1.00122	0.974775	0.940273	0.922552	0.893055	0.88076	0.885777	0.869677	0.86789	0.870548
Fusicoccin 2µM	0.91672	0.907059	0.903417	0.903496	0.857711	0.832037	0.850608	0.879832	0.944942	0.957932	0.969891	0.978992	0.999537	1.02497	1.0499	1.06305	1.07921	1.08482	1.10559	1.10526	1.06227	1.05292	1.0389	1.01926	1.01918	1.00457	0.98397	0.977623	0.961567	0.965321	0.968918	0.965001	0.953474	0.946485	0.938955	0.930755	0.904619	0.903496	0.902627	0.890448	0.875857
Fusicoccin 2µM	0.931518	0.928099	0.918381	0.910997	0.909057	0.89253	0.902717	0.912832	0.916603	0.927557	0.939198	0.956726	0.956432	0.969384	0.98496	1.00762	1.02265	1.03751	1.05578	1.0816	1.07893	1.05246	1.06122	1.06103	1.04411	1.04324	1.02459	1.00672	0.984455	0.969883	0.969188	0.952758	0.938193	0.923572	0.914084	0.903652	0.892379	0.87697	0.878144	0.868926	0.866386
Fusicoccin 2µM	0.910956	0.921547	0.909145	0.909913	0.911658	0.900787	0.904372	0.912858	0.925645	0.929103	0.943286	0.96079	0.972058	1.00752	1.00756	1.01146	1.02362	1.04057	1.06254	1.07286	1.07337	1.06113	1.05575	1.03879	1.01086	1.00069	0.974076	0.954213	0.929719	0.925285	0.90765	0.893233	0.885113	0.868895	0.849532	0.850534	0.848142	0.83475	0.8279	0.827796	0.831432
Fusicoccin 2µM	0.938619	0.938545	0.937508	0.933778	0.931205	0.949698	0.946156	0.95025	0.960553	0.965241	0.970163	0.982731	1.00404	1.02326	1.03944	1.05414	1.06571	1.07708	1.0856	1.08551	1.08678	1.10223	1.09081	1.08603	1.07439	1.03647	1.00185	0.976816	0.950746	0.925484	0.913877	0.904213	0.902164	0.881084	0.868586	0.853329	0.843759	0.838486	0.834808	0.826055	0.81694
Fusicoccin 2µM	0.956173	0.953874	0.937564	0.947288	0.949769	0.940935	0.952597	0.950382	0.967415	0.978388	0.987905	0.990473	1.00916	1.02933	1.03856	1.05454	1.07192	1.07677	1.0832	1.09527	1.10082	1.09483	1.08095	1.07003	1.04195	1.03493	1.00076	0.971108	0.953908	0.937749	0.937626	0.924777	0.910582	0.893877	0.87467	0.875844	0.860038	0.84754	0.844438	0.849902	0.845618
Fusicoccin 2µM	0.951707	0.9502	0.947525	0.951214	0.935982	0.944873	0.941911	0.940934	0.943798	0.957307	0.962745	0.974482	0.991811	1.01811	1.03447	1.05101	1.06448	1.08001	1.09336	1.09541	1.09887	1.11066	1.10792	1.09982	1.10069	1.0845	1.05655	1.03155	1.00949	0.991244	0.973746	0.949903	0.923819	0.913367	0.917393	0.898115	0.884577	0.879972	0.877761	0.867183	0.850328
Fusicoccin 2µM	0.929205	0.931513	0.923656	0.939765	0.933586	0.933451	0.94579	0.93286	0.951928	0.970797	0.990382	0.999261	1.01303	1.02863	1.0435	1.06088	1.05732	1.07416	1.07397	1.07816	1.083	1.07391	1.05636	1.01886	1.00175	0.983354	0.954162	0.943108	0.919417	0.91359	0.904747	0.889618	0.877794	0.866925	0.858225	0.856555	0.847424	0.83803	0.838139	0.828391	0.826793
Fusicoccin 2µM	0.944729	0.936788	0.940513	0.937189	0.938277	0.930891	0.942999	0.956936	0.959226	0.964053	0.971382	0.979225	1.00212	1.01518	1.03278	1.06024	1.08205	1.10259	1.13138	1.14185	1.15015	1.14763	1.14056	1.11955	1.10714	1.09436	1.07294	1.03694	1.02222	1.00464	0.97753	0.961545	0.949968	0.932722	0.917285	0.906053	0.891717	0.869614	0.867644	0.87168	0.849707
Fusicoccin 2µM	0.932757	0.920949	0.918459	0.920588	0.922031	0.919641	0.933157	0.923557	0.912949	0.939792	0.950452	0.967305	0.982839	0.989551	0.996887	1.00246	1.04228	1.0738	1.09685	1.10393	1.1104	1.10588	1.09844	1.08259	1.07404	1.06466	1.03047	0.999065	0.994301	0.964025	0.947513	0.934989	0.924203	0.909405	0.906182	0.901857	0.892779	0.89335	0.88792	0.874157	0.86593
Fusicoccin 2µM	0.92776	0.920776	0.920353	0.9188	0.913079	0.916115	0.917055	0.908586	0.922511	0.932578	0.941465	0.947896	0.958979	0.968736	0.975944	0.99749	1.01269	1.02754	1.03493	1.036	1.04038	1.03274	1.02062	1.01211	1.01538	1.00164	0.99377	0.989349	0.973556	0.950386	0.933759	0.92589	0.906493	0.885938	0.872708	0.869968	0.86909	0.873518	0.874802	0.860084	0.846095

## Sheet: 2f
distance from root tip (µm)	0	20	40	60	80	100	120	140	160	180	200	220	240	260	280	300	320	340	360	380	400	420	440	460	480	500	520	540	560	580	600	620	640	660	680	700	720	740	760	780	800
Col0	0.967613	0.971672	0.977849	0.971215	0.971157	0.977238	0.986693	0.985325	1.00509	1.02176	1.02725	1.03318	1.03903	1.04415	1.05887	1.06638	1.06445	1.05618	1.04448	1.02735	1.00916	0.993171	0.974084	0.959295	0.94132	0.928856	0.917282	0.911437	0.902068	0.8943	0.888236	0.878368	0.873724	0.869154	0.864314	0.854335	0.847731	0.845325	0.839893	0.838769	0.834829
Col0	0.982876	0.988529	0.995814	1.00911	1.01647	1.02069	1.03084	1.03667	1.0413	1.04511	1.05008	1.04993	1.03812	1.04275	1.06553	1.07597	1.07383	1.06643	1.0541	1.03104	1.01286	0.988533	0.968788	0.957459	0.942643	0.925886	0.915504	0.909561	0.908358	0.90074	0.888626	0.877802	0.865274	0.858461	0.848631	0.838616	0.835788	0.829867	0.829224	0.824801	0.825257
Col0	0.988476	0.995317	0.993295	0.99641	0.999714	1.00947	1.01315	1.01904	1.02463	1.02777	1.02545	1.02852	1.03874	1.04956	1.05874	1.06935	1.07098	1.07296	1.07405	1.06151	1.04781	1.03463	1.01861	1.00162	0.983839	0.970121	0.956158	0.947331	0.934049	0.920629	0.91031	0.900946	0.894187	0.880698	0.880644	0.87069	0.870402	0.863386	0.85709	0.850954	0.851521
Col0	1.00299	1.01047	1.01711	1.02771	1.02887	1.03634	1.04522	1.05936	1.06679	1.06774	1.07496	1.07322	1.08197	1.09106	1.09389	1.09567	1.09873	1.10031	1.09557	1.08652	1.06513	1.04692	1.02741	1.00706	0.991415	0.97634	0.963807	0.951509	0.941115	0.932016	0.922675	0.914615	0.908394	0.900592	0.896325	0.885302	0.878734	0.874928	0.872464	0.867363	0.864087
Col0	1.00815	1.01482	1.02239	1.02858	1.03678	1.04367	1.04402	1.03072	1.03832	1.04015	1.03881	1.06469	1.08945	1.09272	1.09727	1.09854	1.09788	1.09574	1.08444	1.06636	1.04488	1.03081	1.01609	0.996023	0.979143	0.966294	0.956725	0.944549	0.93696	0.93117	0.927258	0.920483	0.911789	0.905331	0.90306	0.891929	0.88332	0.878363	0.871279	0.867484	0.861625
Col0	1.00357	1.00882	1.01379	1.01082	1.01297	1.01897	1.02039	1.0214	1.02618	1.02837	1.03504	1.04426	1.0464	1.0573	1.06329	1.07147	1.07897	1.0796	1.07817	1.07166	1.0586	1.04713	1.03015	1.00912	0.991714	0.977037	0.966299	0.957393	0.949115	0.941779	0.937965	0.928316	0.923972	0.916296	0.914485	0.906549	0.903195	0.894026	0.888974	0.884877	0.873267
Col0	1.02506	1.03144	1.03924	1.04776	1.05807	1.06649	1.07455	1.0809	1.08545	1.08874	1.09489	1.10118	1.1075	1.10914	1.11588	1.11977	1.12026	1.11537	1.09791	1.077	1.05124	1.03017	1.00882	0.99318	0.978596	0.960754	0.950969	0.939536	0.931522	0.919286	0.909525	0.906541	0.897322	0.893862	0.889654	0.884379	0.877579	0.87034	0.870892	0.866827	0.864602
Col0	1.0027	1.00091	0.998273	1.00603	1.00872	1.01221	1.02855	1.03751	1.03902	1.04092	1.05625	1.0708	1.08175	1.09368	1.10112	1.11054	1.11803	1.12557	1.12364	1.11912	1.11369	1.10191	1.08909	1.06528	1.04216	1.02229	1.00799	0.99075	0.970504	0.959013	0.946463	0.935839	0.930263	0.920611	0.913124	0.900307	0.892118	0.885896	0.876104	0.868063	0.857313
Col0	1.00421	1.00957	1.01617	1.01911	1.02785	1.01908	1.01754	1.02125	1.02476	1.04893	1.06753	1.06897	1.0748	1.07071	1.07191	1.07193	1.0596	1.0508	1.03152	1.01799	1.00214	0.984299	0.973958	0.963938	0.948519	0.936878	0.929276	0.919962	0.912486	0.899032	0.888807	0.882391	0.87202	0.866113	0.856034	0.850118	0.842952	0.839695	0.837077	0.836615	0.836798
Col0	1.01436	1.01631	1.02099	1.02258	1.03244	1.0451	1.04594	1.04957	1.0544	1.05927	1.0649	1.07118	1.0766	1.07435	1.08473	1.08143	1.08274	1.0846	1.08453	1.0832	1.07283	1.05233	1.0353	1.01414	1.00372	0.99044	0.981706	0.972243	0.960955	0.952557	0.943378	0.937832	0.929905	0.925185	0.916025	0.908205	0.905036	0.896909	0.886158	0.878399	0.873705
Col0	1.00201	0.997181	0.994575	0.989452	0.985693	0.981612	0.973902	0.973168	0.97746	0.978708	0.97634	0.98204	0.99307	0.992882	1.00264	1.0026	1.00192	1.00562	1.005	1.01674	1.00925	1.00261	1.00207	1.00616	1.00418	0.993586	0.985593	0.974233	0.968528	0.958193	0.949286	0.940254	0.937605	0.926459	0.922127	0.919142	0.907288	0.897308	0.887835	0.885431	0.880925
Col0	0.998685	1.001	0.997927	0.999664	1.0012	0.998042	1.00108	1.01027	1.00835	1.00046	1.00021	1.00655	1.01512	1.02141	1.02018	1.02398	1.02394	1.01701	1.00969	0.994635	0.986277	0.975189	0.958972	0.952361	0.94728	0.937919	0.928694	0.921408	0.914215	0.907242	0.899519	0.895408	0.88922	0.880787	0.882752	0.871303	0.864363	0.863889	0.859328	0.850506	0.848798
Col0	0.967755	0.966068	0.960957	0.963092	0.95995	0.955553	0.961835	0.962234	0.969377	0.972125	0.971049	0.973219	0.97708	0.981903	0.980694	0.977346	0.984695	0.986661	0.981524	0.976706	0.973358	0.968659	0.963989	0.957761	0.945025	0.937816	0.92639	0.918734	0.905103	0.900606	0.894175	0.884291	0.8812	0.87308	0.867591	0.857616	0.848454	0.846266	0.845122	0.841463	0.838108
Col0	1.009	1.01331	1.01277	1.00965	1.01301	1.00463	1.00988	1.00068	1.00082	0.999823	1.00186	1.00134	1.00606	1.00734	1.01627	1.02277	1.02531	1.02979	1.02402	1.02224	1.02394	1.01756	1.01678	1.01188	0.997717	0.991847	0.982939	0.968414	0.957812	0.940387	0.932076	0.922278	0.90975	0.906433	0.896671	0.892287	0.885757	0.868313	0.862925	0.865896	0.855146
Col0	0.995539	0.992404	0.989975	0.984246	0.983748	0.98022	0.980969	0.983655	0.990865	0.993944	1.00043	1.00815	1.0234	1.02539	1.03169	1.03664	1.04272	1.04108	1.04054	1.03252	1.01419	1.00277	0.997351	0.98994	0.981331	0.966214	0.959104	0.942541	0.932198	0.923594	0.916379	0.906909	0.901446	0.885734	0.868464	0.860761	0.850373	0.842492	0.836716	0.833828	0.830811
Col0	1.01237	1.01448	1.01487	1.0165	1.02112	1.02658	1.02888	1.03132	1.0279	1.02731	1.02938	1.02763	1.02556	1.05425	1.06306	1.05674	1.05714	1.04954	1.03554	1.0188	0.997542	0.985292	0.96925	0.961147	0.946817	0.93397	0.927906	0.92596	0.911905	0.907179	0.898544	0.892368	0.892443	0.881881	0.882273	0.878714	0.876826	0.871835	0.870778	0.868708	0.864385
Col0	1.02013	1.01595	1.0211	1.02539	1.02391	1.02109	1.01956	1.0159	1.01727	1.02088	1.02193	1.031	1.04116	1.0412	1.04977	1.05145	1.03163	1.01456	0.998279	1.00077	1.01238	0.994076	0.978373	0.969642	0.954116	0.937215	0.925163	0.91548	0.906305	0.896953	0.880495	0.872789	0.866585	0.857463	0.849213	0.837966	0.830375	0.826038	0.819513	0.822108	0.817279
Col0	1.0072	1.01011	1.01147	1.00697	1.00692	1.003	1.00454	1.00557	1.0128	1.00993	1.01824	1.02279	1.02914	1.03567	1.04176	1.04774	1.0544	1.054	1.05622	1.05645	1.05738	1.05066	1.03816	1.02854	1.00935	1.00187	0.991386	0.975049	0.965183	0.95582	0.943738	0.932108	0.916462	0.904849	0.894002	0.882791	0.877848	0.86402	0.856285	0.853631	0.845276
Col0	1.00543	1.00305	0.998792	1.00215	0.998331	1.00883	1.0121	1.01763	1.02385	1.02215	1.03389	1.03863	1.04452	1.05016	1.04651	1.03781	1.02842	1.02466	1.02007	1.00197	0.981887	0.975509	0.967355	0.956733	0.945634	0.935548	0.926619	0.924903	0.918801	0.911575	0.904222	0.88953	0.882681	0.877271	0.872708	0.875873	0.867758	0.865454	0.861562	0.860519	0.860824
Col0	0.981886	0.977909	0.970964	0.968848	0.962061	0.965043	0.971237	0.989452	1.00095	1.00925	1.01527	1.02526	1.0292	1.03854	1.04785	1.05608	1.06546	1.07768	1.07671	1.06781	1.04775	1.02374	1.00897	0.995061	0.980909	0.965516	0.953593	0.945422	0.937545	0.924398	0.913037	0.907062	0.89738	0.88981	0.885602	0.878943	0.870843	0.865763	0.864001	0.86624	0.861149
Col0	1.00605	1.00703	1.0157	1.01235	1.01007	1.01067	1.00753	1.00983	1.01065	1.01146	1.01464	1.01766	1.02677	1.03276	1.04003	1.0482	1.05713	1.05638	1.05273	1.04374	1.024	1.00465	0.993404	0.970362	0.95887	0.946127	0.932217	0.926436	0.918084	0.909964	0.905859	0.894184	0.885156	0.880428	0.8737	0.87044	0.866808	0.859429	0.855815	0.85179	0.838623
Col0	0.995456	0.997561	0.997829	0.992655	0.989096	0.985714	0.971607	0.972229	0.975525	0.977729	0.984337	0.985425	0.993645	0.99525	1.00175	1.00837	1.01237	1.01663	1.01688	1.00318	1.0113	0.998442	0.98412	0.962304	0.960965	0.950027	0.931045	0.913111	0.897824	0.886318	0.873991	0.86758	0.862249	0.85709	0.85615	0.851981	0.843488	0.844114	0.84129	0.838583	0.837371
Col0	1.00546	1.00402	1.00455	1.00485	0.998234	0.998517	1.0049	1.01047	1.01271	1.01923	1.02115	1.02818	1.01349	1.00221	0.98901	0.987034	0.981398	0.967668	0.942711	0.923617	0.911167	0.88805	0.871383	0.861291	0.855822	0.849398	0.847336	0.837649	0.830966	0.827611	0.825459	0.825523	0.831091	0.82947	0.834576	0.838635	0.844685	0.84405
Col0	1.02773	1.03005	1.02636	1.02451	1.02988	1.02942	1.03123	1.03225	1.03294	1.03181	1.03521	1.03405	1.04931	1.05426	1.0615	1.06886	1.07503	1.06727	1.06894	1.06258	1.04684	1.03488	1.00965	0.988568	0.973069	0.962762	0.945348	0.929027	0.922265	0.917398	0.916145	0.905379	0.900696	0.895769	0.887518	0.876052	0.861683	0.858033	0.854978	0.847183	0.838167
Col0	1.00987	1.00642	1.00816	1.00589	1.00766	0.997992	1.00027	0.998864	1.0039	1.00518	1.00799	1.01116	1.0189	1.02696	1.02721	1.03382	1.04146	1.04609	1.04882	1.05389	1.04613	1.04381	1.03779	1.02408	1.00476	0.991247	0.982016	0.964905	0.9564	0.949818	0.935786	0.923974	0.915038	0.909094	0.904136	0.901227	0.898967	0.883299	0.874185	0.863967	0.856003
Col0	0.994202	0.999071	0.993719	0.986466	0.976449	0.985563	0.983975	0.98809	0.990114	0.989145	0.996634	0.996284	0.999861	1.00967	1.0208	1.02664	1.03105	1.04182	1.04137	1.02915	1.02245	1.01149	0.995843	0.9835	0.96738	0.949611	0.939689	0.924328	0.916633	0.90924	0.897895	0.891803	0.884211	0.878535	0.874214	0.87215	0.861379	0.85888	0.851985	0.848949	0.849078
Col0	0.994251	0.991746	0.988319	0.986572	0.979573	0.973546	0.964476	0.962417	0.959906	0.960211	0.964475	0.971262	0.977878	0.977502	0.988397	0.989028	0.992019	1.00073	1.00819	1.00523	1.00142	0.989254	0.981296	0.972085	0.959703	0.950907	0.945311	0.938393	0.927898	0.919596	0.907342	0.891389	0.892889	0.887073	0.883802	0.874227	0.87144	0.870092	0.861808	0.849715	0.844569
Col0	0.995683	0.994341	0.993867	0.99109	0.985778	0.982293	0.981062	0.979206	0.979705	0.986092	0.987795	0.994481	0.99276	0.995657	1.00844	1.01546	1.026	1.03948	1.04327	1.03778	1.04565	1.04647	1.03815	1.02758	1.00877	0.995141	0.971044	0.954995	0.943535	0.941253	0.928935	0.904179	0.905647	0.895351	0.882301	0.866431	0.86923	0.860662	0.843662	0.838807	0.843138
Col0	0.967303	0.968835	0.964001	0.954488	0.952295	0.948328	0.947315	0.952767	0.956884	0.971346	0.971098	0.972824	0.977953	0.978356	0.981008	0.982382	1.00011	1.01897	1.01818	1.02391	1.02577	1.02901	1.02099	1.01516	0.997534	0.988298	0.978553	0.968925	0.952826	0.935416	0.924935	0.913464	0.903002	0.895963	0.889963	0.88361	0.877073	0.868319	0.862757	0.860228	0.850489
Col0	1.00399	1.00467	1.00581	1.00673	1.0022	0.990642	0.998973	1.00051	0.996201	0.998259	1.01157	1.01543	1.0244	1.02534	1.03158	1.0333	1.03717	1.03606	1.03368	1.02998	1.02194	1.01437	1.00251	0.993106	0.97788	0.964302	0.959093	0.943062	0.93414	0.9262	0.913422	0.910668	0.89514	0.889118	0.880779	0.874319	0.87392	0.869561	0.863815	0.858272	0.852754
pin2>>AHAd95	0.996991	0.996313	1.00339	1.0045	1.01079	1.00778	1.01516	1.02336	1.02375	1.03351	1.03972	1.03893	1.04098	1.04755	1.05761	1.05678	1.06025	1.0632	1.05058	1.0369	1.03993	1.02734	1.00805	0.995231	0.979365	0.966643	0.959163	0.948278	0.937504	0.930849	0.921873	0.915243	0.904864	0.902142	0.897085	0.88821	0.882496	0.876893	0.868151	0.859314	0.848078
pin2>>AHAd95	0.967214	0.969546	0.97459	0.972964	0.967824	0.967095	0.968685	0.96746	0.963667	0.968809	0.969829	0.973373	0.984428	0.996441	1.01083	1.01256	1.02039	1.03696	1.04733	1.06271	1.07216	1.06882	1.05031	1.02444	1.00142	0.983812	0.959417	0.937928	0.92353	0.908517	0.900688	0.890836	0.883321	0.875879	0.874941	0.865668	0.859976	0.857559	0.850067	0.844845	0.837
pin2>>AHAd95	0.973169	0.972841	0.975697	0.978369	0.977632	0.968589	0.96494	0.964124	0.966801	0.969781	0.969857	0.967846	0.968701	0.972042	0.97964	0.987514	1.00064	1.00119	1.00809	1.02143	1.0214	1.02453	1.01263	1.00261	0.986073	0.965897	0.948534	0.932717	0.920233	0.906447	0.902082	0.895531	0.886906	0.877668	0.874613	0.86944	0.861788	0.859907	0.85357	0.85309	0.846476
pin2>>AHAd95	0.993141	0.999958	0.998572	0.998617	0.995737	0.994462	0.996213	0.999739	1.00359	1.00163	1.00023	1.00915	1.01841	1.02012	1.02935	1.03934	1.04439	1.04914	1.04811	1.04072	1.03318	1.02006	1.00695	0.987223	0.970706	0.961471	0.953067	0.945973	0.943413	0.933992	0.925597	0.917155	0.909705	0.898212	0.891543	0.884761	0.875737	0.86774	0.865145	0.858504	0.852388
pin2>>AHAd95	0.982726	0.986992	0.99648	0.992366	0.994279	0.99411	0.99413	0.993216	0.994586	0.989324	0.992328	0.997018	0.995695	1.00451	1.01056	1.01183	1.0257	1.03665	1.04237	1.04657	1.0429	1.02976	1.01675	0.995534	0.974928	0.967471	0.954971	0.939836	0.933767	0.928581	0.917588	0.907971	0.902925	0.897396	0.889163	0.885596	0.878557	0.871552	0.855502	0.848271	0.83702
pin2>>AHAd95	0.986419	0.993419	1.00224	0.997132	0.999828	1.00836	1.01165	1.00901	1.01002	1.01266	1.01604	1.01642	1.02402	1.03209	1.042	1.04725	1.0528	1.05415	1.06374	1.06386	1.0613	1.05081	1.04033	1.02111	1.00261	0.98871	0.971234	0.956397	0.944934	0.933916	0.919719	0.909079	0.900523	0.895944	0.888903	0.878028	0.870493	0.864266	0.86007	0.848761	0.845039
pin2>>AHAd95	1.00944	1.01334	1.01945	1.02153	1.02611	1.03257	1.04183	1.04564	1.05103	1.05847	1.06254	1.06716	1.07506	1.07824	1.08613	1.08602	1.08975	1.08953	1.08899	1.07886	1.06988	1.0379	1.02231	1.01867	1.00544	0.988095	0.964025	0.950435	0.937165	0.932436	0.924177	0.921547	0.914317	0.907921	0.90113	0.897021	0.886953	0.883749	0.864257	0.849331	0.845946
pin2>>AHAd95	1.00189	1.0028	1.0112	1.01536	1.02436	1.03067	1.04028	1.05056	1.0615	1.06711	1.06664	1.07432	1.07884	1.0886	1.0906	1.09288	1.09838	1.09902	1.09561	1.0782	1.06219	1.04226	0.993729	0.972107	0.953928	0.937188	0.929553	0.918652	0.911795	0.905179	0.899563	0.890954	0.884182	0.873598	0.867971	0.862908	0.853262	0.846204	0.843352	0.83331	0.82691
pin2>>AHAd95	0.98222	0.991465	0.999109	1.0061	1.01234	1.01294	1.01375	1.01749	1.01591	1.01839	1.02021	1.02206	1.02872	1.02925	1.0217	1.0117	0.999268	0.987477	0.974518	0.962484	0.946374	0.932165	0.922307	0.904978	0.898061	0.88825	0.879423	0.875296	0.86803	0.859403	0.852294	0.847515	0.843435	0.837021	0.834093	0.831006	0.830228	0.830447	0.836106	0.838773	0.841183
pin2>>AHAd95	0.979883	0.979052	0.981416	0.972242	0.976981	0.978344	0.974514	0.989059	0.987567	0.989635	0.990207	0.995991	1.0033	1.00351	1.00793	1.00584	0.998887	1.00611	1.00749	1.00186	0.991575	0.984158	0.977095	0.968803	0.955139	0.941499	0.931128	0.927793	0.924884	0.920965	0.909948	0.904038	0.90098	0.893021	0.882644	0.881439	0.872363	0.86916	0.856995	0.859701	0.851393
pin2>>AHAd95	1.01898	1.02429	1.02533	1.02198	1.02142	1.0226	1.01722	1.0123	1.01787	1.01655	1.01276	1.01733	1.0174	1.01751	1.01695	1.00993	0.998539	0.997858	0.997655	0.996631	0.995233	0.994478	0.991131	0.992166	0.984036	0.980664	0.976901	0.968121	0.956269	0.945275	0.938617	0.935471	0.929806	0.918745	0.914079	0.908239	0.898741	0.892231	0.883726	0.874459	0.872325
pin2>>AHAd95	0.964121	0.963174	0.960313	0.954759	0.946001	0.945875	0.945422	0.94964	0.956872	0.961404	0.952286	0.962273	0.962979	0.968831	0.983648	0.992326	0.991927	0.99123	0.982581	0.971556	0.967077	0.960105	0.95406	0.947516	0.942965	0.932867	0.924833	0.921905	0.912172	0.897518	0.889528	0.882891	0.877648	0.870644	0.864586	0.859746	0.850388	0.844654	0.841978	0.843076	0.837634
pin2>>AHAd95	0.941723	0.937757	0.933474	0.925432	0.917919	0.914715	0.909166	0.908965	0.906565	0.907918	0.906955	0.904732	0.903409	0.902967	0.908645	0.916084	0.919889	0.929458	0.93482	0.951938	0.964741	0.968832	0.969267	0.954356	0.9368	0.926445	0.922729	0.916814	0.905862	0.889045	0.875736	0.864207	0.855354	0.846413	0.84029	0.836601	0.835753	0.828099	0.825449	0.817126	0.816176
pin2>>AHAd95	0.974837	0.975256	0.969937	0.954383	0.955609	0.949229	0.957725	0.959286	0.963412	0.96408	0.968552	0.974198	0.980869	0.989106	0.999569	1.00662	1.01204	1.02065	1.01556	1.01571	1.0109	0.995867	0.979643	0.973508	0.954435	0.943556	0.938655	0.933746	0.920319	0.906982	0.89683	0.892406	0.88722	0.879385	0.877046	0.866389	0.86402	0.853855	0.851123	0.846149	0.838697
pin2>>AHAd95	1.00092	0.998002	0.998988	0.995465	0.999327	1.00603	1.01002	1.01635	1.0151	1.02141	1.02438	1.03238	1.03716	1.03883	1.04137	1.04052	1.03154	1.02231	1.01531	1.00792	0.99216	0.97862	0.974741	0.964207	0.959972	0.945512	0.936455	0.930038	0.928769	0.918134	0.903344	0.893422	0.883298	0.875551	0.867518	0.860896	0.86032	0.862253	0.85773	0.857889	0.859494
pin2>>AHAd95	1.00197	1.00006	1.00324	1.00104	0.994464	0.986833	0.991222	0.991859	0.99671	1.00184	1.01661	1.0185	1.01558	1.02206	1.02007	1.0156	1.01965	1.02226	1.03168	1.02778	1.02405	1.01455	1.00713	1.00074	0.990868	0.985473	0.96984	0.9609	0.955181	0.953641	0.951151	0.942739	0.933339	0.934222	0.924074	0.915751	0.904829	0.899921	0.892075	0.883799	0.880029
pin2>>AHAd95	0.954519	0.951146	0.948366	0.938295	0.934683	0.928455	0.934482	0.931842	0.938086	0.942039	0.94189	0.950238	0.956208	0.954968	0.956639	0.966673	0.976542	0.979176	0.985274	0.989103	0.987781	0.969421	0.971533	0.96987	0.968778	0.966375	0.957345	0.949601	0.930721	0.917058	0.903498	0.893327	0.884735	0.877968	0.870039	0.861315	0.848899	0.843956	0.839775	0.836839	0.828082
pin2>>AHAd95	0.916089	0.90557	0.899727	0.891813	0.888961	0.885092	0.878994	0.879866	0.881064	0.884688	0.886476	0.890414	0.892435	0.898283	0.902579	0.907433	0.916342	0.929384	0.937323	0.931123	0.932958	0.923863	0.917146	0.913072	0.899854	0.894153	0.87972	0.876277	0.867608	0.86476	0.865166	0.852603	0.841525	0.835969	0.834499	0.832065	0.828351	0.822302	0.819804	0.809885	0.80786
pin2>>AHAd95	0.958586	0.953655	0.947887	0.945612	0.936615	0.934758	0.923596	0.923788	0.926218	0.923449	0.932101	0.92823	0.924691	0.927385	0.931134	0.934825	0.939818	0.94381	0.948403	0.956398	0.961013	0.96652	0.969934	0.970106	0.968726	0.961299	0.958591	0.957446	0.944333	0.933675	0.92552	0.910522	0.903899	0.891419	0.876723	0.876905	0.869831	0.865964	0.866996	0.859327	0.856427
pin2>>AHAd95	0.995364	0.997974	0.995869	0.998156	1.00531	0.998941	0.996741	0.989748	0.988089	0.990803	0.995215	0.998575	0.99944	0.998921	1.00191	1.00642	1.0093	1.01645	1.01787	1.01931	1.02215	1.02561	1.02672	1.02219	1.01568	1.00618	0.994584	0.985714	0.973033	0.957719	0.948698	0.931662	0.925371	0.916602	0.905482	0.902444	0.901762	0.893955	0.88329	0.882756	0.871214
pin2>>AHAd95	0.936385	0.937303	0.919673	0.914454	0.913024	0.898758	0.886517	0.881076	0.878696	0.876334	0.893233	0.895182	0.898724	0.90454	0.911713	0.916297	0.926678	0.928818	0.938142	0.939462	0.94677	0.959326	0.964638	0.97374	0.972254	0.974201	0.972373	0.968044	0.962923	0.951939	0.944967	0.928634	0.91898	0.910976	0.899366	0.89243	0.883223	0.869151	0.860552	0.851255	0.846852
pin2>>AHAd95	0.931761	0.930649	0.921731	0.914034	0.906898	0.903354	0.895635	0.88725	0.883404	0.877342	0.879226	0.880731	0.881375	0.879824	0.882629	0.889364	0.891715	0.893312	0.902748	0.907172	0.90914	0.911664	0.908964	0.910289	0.918874	0.919006	0.918921	0.917886	0.913457	0.907848	0.898758	0.879928	0.877484	0.863509	0.855571	0.848641	0.839824	0.831798	0.824365	0.81963	0.82108
pin2>>AHAd95	0.940481	0.93436	0.922407	0.926585	0.919191	0.9178	0.917714	0.913343	0.911724	0.90877	0.912239	0.909282	0.907532	0.909542	0.911237	0.916573	0.919223	0.92639	0.932185	0.938479	0.949116	0.949519	0.941346	0.929782	0.917659	0.90804	0.896488	0.884705	0.877169	0.87137	0.857898	0.854898	0.847293	0.84423	0.836864	0.829397	0.827022	0.816745	0.814013	0.806787	0.807022
pin2>>AHAd95	0.938865	0.939849	0.930516	0.923448	0.922532	0.915901	0.909559	0.912354	0.90905	0.912134	0.912831	0.920187	0.923523	0.926222	0.92751	0.933912	0.942763	0.946239	0.947426	0.955616	0.958268	0.965643	0.961863	0.957996	0.955114	0.942815	0.934927	0.922805	0.912995	0.908775	0.905446	0.897423	0.880415	0.86663	0.858446	0.851515	0.846651	0.841398	0.838432	0.83155	0.822493
pin2>>AHAd95	0.940933	0.929796	0.92568	0.922106	0.915172	0.914548	0.914936	0.914936	0.914367	0.916425	0.922872	0.921073	0.929008	0.931861	0.936463	0.937287	0.94876	0.954418	0.958823	0.962722	0.958784	0.953941	0.944459	0.929997	0.917428	0.909853	0.896537	0.888538	0.883647	0.877436	0.86755	0.866135	0.860393	0.859487	0.85464	0.85095	0.848688	0.84484	0.844697	0.835249	0.829202
pin2>>PP2C-D1	1.00739	1.01634	1.02222	1.02835	1.03393	1.035	1.03618	1.03377	1.04038	1.04116	1.04428	1.04282	1.01359	0.996219	0.992731	0.993348	0.98969	0.980727	0.971996	0.961547	0.951031	0.942673	0.935924	0.927935	0.915377	0.904741	0.891445	0.880437	0.866712	0.86282	0.856332	0.854081	0.851655	0.848478	0.845864	0.846797	0.84794	0.844569	0.851386	0.857185	0.862339
pin2>>PP2C-D1	0.997351	1.00314	1.00924	1.01092	1.01261	1.02267	1.02337	1.02535	1.02733	1.03252	1.0398	1.04599	1.05257	1.05785	1.05728	1.05347	1.04923	1.0474	1.0389	1.03122	1.02981	1.00673	0.98894	0.980037	0.967579	0.959819	0.950116	0.944492	0.940477	0.935188	0.92838	0.916986	0.910122	0.903689	0.89948	0.88774	0.880261	0.867133	0.857248	0.852687	0.844146
pin2>>PP2C-D1	0.99563	1.00823	1.00877	1.02282	1.03643	1.04281	1.05079	1.05915	1.06308	1.06679	1.07111	1.07669	1.08092	1.08734	1.08575	1.06506	1.06089	1.06547	1.06523	1.05333	1.0331	1.01053	0.995449	0.984489	0.970307	0.954709	0.944263	0.935103	0.92499	0.913648	0.903279	0.895574	0.889665	0.880971	0.875027	0.871649	0.858293	0.847283	0.841839	0.838057	0.827259
pin2>>PP2C-D1	0.999803	1.00544	1.0142	1.02285	1.02883	1.03811	1.04642	1.05385	1.05784	1.05579	1.06091	1.06821	1.07015	1.0724	1.07982	1.07422	1.07254	1.06105	1.0469	1.03308	1.01755	1.00058	0.985257	0.972206	0.959813	0.945205	0.934794	0.925289	0.918073	0.90756	0.895908	0.885038	0.880135	0.869054	0.856894	0.847913	0.846077	0.84225	0.836016	0.836744	0.837352
pin2>>PP2C-D1	1.0193	1.02472	1.03403	1.03386	1.0422	1.04811	1.05206	1.05144	1.05406	1.0568	1.06856	1.07466	1.08472	1.08442	1.0878	1.09005	1.09433	1.09611	1.09457	1.08673	1.06071	1.04043	1.01705	1.00004	0.984398	0.965716	0.949452	0.930794	0.919123	0.91091	0.902575	0.893161	0.888612	0.882121	0.873049	0.863213	0.860478	0.861721	0.85682	0.859832	0.865163
pin2>>PP2C-D1	1.02596	1.02924	1.0304	1.0391	1.0437	1.04473	1.05049	1.06189	1.06861	1.0731	1.07038	1.07758	1.08124	1.07657	1.06262	1.05361	1.04432	1.03519	1.0197	1.0061	0.996222	0.98563	0.971611	0.9546	0.93682	0.924874	0.91191	0.894464	0.887533	0.879546	0.876627	0.874797	0.879586	0.882545	0.887852	0.899523	0.887108	0.89169	0.902065	0.901606	0.909692
pin2>>PP2C-D1	1.02229	1.0261	1.02832	1.03515	1.03411	1.03888	1.04381	1.05552	1.06745	1.06858	1.07218	1.07717	1.08292	1.08955	1.09333	1.0927	1.08086	1.06483	1.04968	1.0332	1.01905	1.0006	0.986159	0.976318	0.964718	0.948946	0.93755	0.927275	0.914416	0.907252	0.90099	0.895591	0.898309	0.896196	0.888069	0.894422	0.899035	0.897478	0.895936	0.898537	0.897429
pin2>>PP2C-D1	1.02101	1.02307	1.02187	1.02107	1.01728	1.01711	1.02779	1.03255	1.03526	1.02467	1.02274	1.04567	1.06917	1.0791	1.07806	1.07335	1.06073	1.04488	1.03188	1.02102	1.00526	0.992923	0.976695	0.96489	0.953408	0.941116	0.925673	0.914379	0.901438	0.889304	0.877892	0.871253	0.8587	0.857235	0.856852	0.855048	0.855308	0.855664	0.861289	0.869173	0.870042
pin2>>PP2C-D1	1.02176	1.02848	1.02901	1.03085	1.03888	1.03871	1.04688	1.05099	1.05659	1.06419	1.06942	1.07539	1.08283	1.08245	1.08419	1.08406	1.07617	1.06329	1.05374	1.03039	1.01841	1.00649	0.999229	0.995792	0.982717	0.978737	0.970793	0.968235	0.954655	0.954239	0.938488	0.924856	0.92275	0.913773	0.909859	0.905283	0.902722	0.898062	0.898204	0.903105	0.906393
pin2>>PP2C-D1	1.02654	1.03254	1.02404	1.02321	1.03138	1.03021	1.03553	1.03144	1.03833	1.05944	1.06255	1.06736	1.0742	1.07483	1.07583	1.07361	1.06977	1.06346	1.04466	1.03242	1.01892	1.00743	0.995815	0.986619	0.980154	0.967025	0.964689	0.954058	0.943731	0.93464	0.926775	0.920523	0.914476	0.90526	0.897177	0.893038	0.891741	0.880922	0.87455	0.876091	0.874266
pin2>>PP2C-D1	1.02921	1.02734	1.03617	1.04146	1.03883	1.04225	1.05209	1.05557	1.05631	1.04833	1.04229	1.03618	1.02804	1.01235	1.00316	0.988481	0.973117	0.959418	0.942652	0.928114	0.916107	0.90519	0.899972	0.904356	0.899868	0.905715	0.90689	0.906665	0.911811	0.912982	0.91772	0.917139	0.905609	0.920345	0.923847	0.92334	0.923413	0.928189	0.922125	0.925863	0.916124
pin2>>PP2C-D1	1.00219	1.00459	1.00254	1.0052	1.00301	1.00593	1.00643	1.00895	1.01284	1.00958	1.01599	1.01849	1.01312	1.00885	1.00722	0.997144	0.986416	0.976332	0.956826	0.942354	0.93914	0.923332	0.914213	0.903954	0.894284	0.8902	0.887873	0.878127	0.87601	0.871899	0.874484	0.875102	0.87534	0.875668	0.880144	0.878783	0.883223	0.8798	0.88446	0.885036	0.88849
pin2>>PP2C-D1	1.01456	1.01905	1.023	1.02651	1.032	1.02464	1.03039	1.02809	1.03205	1.03253	1.0372	1.03626	1.0381	1.04667	1.05264	1.05418	1.05627	1.05553	1.05307	1.04887	1.0422	1.03413	1.02231	1.00871	0.997689	0.993439	0.983398	0.971009	0.95855	0.943789	0.933132	0.929789	0.916341	0.911246	0.911437	0.911067	0.905072	0.913408	0.921492	0.917912	0.922387
pin2>>PP2C-D1	1.05213	1.04712	1.04545	1.04412	1.039	1.03589	1.03199	1.0308	1.02854	1.02934	1.02772	1.02948	1.03392	1.02782	1.01877	1.01999	1.02227	1.017	1.005	0.99724	0.991039	0.980523	0.967822	0.96309	0.955193	0.942529	0.933211	0.927097	0.919156	0.909852	0.902512	0.893633	0.88804	0.885955	0.881003	0.87661	0.87258	0.872653	0.870551	0.864725	0.86548
	Cm =	control media
