# Supplementary material for: The AUX1-AFB1-CNGC14 module establishes a longitudinal root surface pH profile
Source: eLife. 2023 Jul 14;12:e85193. doi: 10.7554/eLife.85193 (PMC10414970; doi:10.7554/eLife.85193)
Supplement: Figure 3—figure supplement 1—source data 1. [file elife-85193-fig3-figsupp1-data1.xlsx]

## Sheet: S3a
distance from root tip (µm)	0	20	40	60	80	100	120	140	160	180	200	220	240	260	280	300	320	340	360	380	400	420	440	460	480	500	520	540	560	580	600	620	640	660	680	700	720	740	760	780	800
col_cm	0.973742	0.972241	0.9718	0.975768	0.971955	0.969604	0.968775	0.967023	0.971006	0.968529	0.966307	0.963167	0.964053	0.966034	0.970872	0.980382	0.984421	0.989122	0.998091	1.00281	1.00682	1.00695	1.00713	1.00244	0.992757	0.983251	0.963028	0.951473	0.926632	0.908443	0.896133	0.883031	0.868044	0.860806	0.84984	0.840548	0.834834	0.830321	0.829001	0.819372	0.81807
col_cm	0.996259	0.997282	0.999454	1.00042	1.0067	1.00967	1.01817	1.01807	1.01828	1.01899	1.03599	1.04184	1.04583	1.05382	1.05749	1.0691	1.08166	1.10293	1.11926	1.13655	1.13987	1.13957	1.13028	1.11687	1.09774	1.07471	1.04903	1.0268	1.00515	0.982946	0.967148	0.954508	0.940544	0.924693	0.912842	0.901633	0.889307	0.879251	0.874914	0.867132	0.862174
col_cm	1.01423	1.01806	1.02391	1.02983	1.04028	1.03972	1.05021	1.05607	1.0578	1.06316	1.06421	1.07169	1.07168	1.07872	1.07959	1.09482	1.11046	1.13329	1.1417	1.13681	1.14393	1.14358	1.13022	1.11393	1.0945	1.07854	1.06173	1.03726	1.01975	0.999423	0.985542	0.969397	0.947802	0.938651	0.920865	0.905067	0.900375	0.892788	0.886238	0.8803	0.878833
col_cm	1.004	1.00452	1.00214	1.00829	1.00648	1.01045	1.00217	0.995159	0.992602	0.994754	1.00317	1.00517	1.01533	1.01788	1.02398	1.02855	1.03304	1.03716	1.03843	1.03823	1.03463	1.02636	1.00996	0.998837	0.984471	0.96901	0.961221	0.94691	0.937123	0.926949	0.915209	0.904135	0.894076	0.885754	0.876157	0.868227	0.86041	0.85403	0.854366	0.850729	0.845157
col_cm	1.01177	1.01559	1.02241	1.0219	1.0222	1.0225	1.02975	1.03876	1.04768	1.04837	1.04823	1.05082	1.06657	1.08243	1.08895	1.09169	1.10126	1.11211	1.11738	1.11641	1.11062	1.09368	1.07507	1.05501	1.03783	1.01538	1.00102	0.980803	0.962665	0.943505	0.933957	0.923226	0.909785	0.898634	0.892105	0.885076	0.88062	0.873788	0.864347	0.86195	0.855285
col_cm	0.96803	0.974543	0.98339	0.983895	0.988123	0.992449	0.995248	1.00207	1.00567	1.00229	1.01145	1.01013	1.01445	1.01742	1.0238	1.02665	1.03023	1.02779	1.02815	1.02065	1.00255	0.984336	0.969373	0.955082	0.93823	0.923045	0.90474	0.893915	0.883752	0.871863	0.86287	0.857198	0.844293	0.840755	0.838353	0.836761	0.831837	0.831712	0.83346	0.833746	0.832896
col_cm	0.97738	0.976543	0.988044	0.987458	0.994141	1.00054	1.00255	1.00817	1.01401	1.01569	1.01759	1.02398	1.02646	1.03352	1.03603	1.04073	1.04087	1.04129	1.03445	1.03235	1.02116	1.00132	0.979532	0.954954	0.937646	0.919935	0.89927	0.878836	0.862197	0.856837	0.849461	0.835012	0.833185	0.82441	0.815313	0.810698	0.809994	0.812127	0.812038	0.812502	0.811448
col_cm	0.995844	1.0019	1.00746	1.01271	1.0188	1.0289	1.03511	1.04218	1.04775	1.05276	1.05836	1.06048	1.06775	1.0766	1.09111	1.10082	1.1079	1.11706	1.10732	1.11957	1.11039	1.10364	1.0888	1.07479	1.05607	1.03808	1.02186	1.00494	0.987298	0.979931	0.959492	0.940072	0.923349	0.905497	0.895919	0.891354	0.87451	0.867551	0.860983	0.861895	0.857674
col_cm	0.994739	1.00221	1.00225	1.01229	1.02286	1.02805	1.02837	1.02969	1.02985	1.03468	1.03755	1.03534	1.0418	1.0434	1.05857	1.07627	1.07347	1.07442	1.08536	1.08936	1.08619	1.07184	1.0475	1.02443	0.999909	0.981664	0.961282	0.94193	0.924305	0.9052	0.890916	0.875189	0.858237	0.845502	0.835552	0.826797	0.817064	0.806283	0.806451	0.79928	0.796832
col_cm	1.00539	1.00912	1.01735	1.02938	1.03918	1.05234	1.05561	1.06584	1.07695	1.08138	1.08339	1.08875	1.09209	1.09804	1.09957	1.10158	1.10293	1.07841	1.08574	1.08716	1.08664	1.10497	1.135	1.12968	1.11467	1.10234	1.08362	1.06127	1.03959	1.01187	0.995518	0.967551	0.953731	0.932388	0.916827	0.904383	0.890401	0.885881	0.878964	0.866356	0.863737
col_cm	0.984564	0.988441	0.990596	0.990511	0.995224	0.999772	1.00187	1.00079	0.985685	0.97381	0.97681	0.981782	0.980921	0.98994	0.992404	0.995781	0.99587	1.00147	1.00623	0.998119	0.989411	0.978877	0.968244	0.959213	0.943914	0.92814	0.9124	0.903443	0.8989	0.893286	0.878817	0.872831	0.869502	0.862249	0.861129	0.853203	0.848428	0.843776	0.840766	0.838087	0.8426
col_cm	1.01331	1.01701	1.02601	1.03546	1.04475	1.0524	1.06324	1.06681	1.07724	1.07987	1.08094	1.07987	1.06789	1.05767	1.06137	1.07764	1.10788	1.11486	1.11724	1.12627	1.12515	1.11376	1.09345	1.07558	1.05695	1.04256	1.02151	1.00405	0.989438	0.977204	0.961611	0.942271	0.933254	0.917576	0.903799	0.89601	0.886805	0.878452	0.870668	0.86102	0.85603
col_cm	1.01472	1.02607	1.03773	1.04195	1.04845	1.06132	1.06552	1.0737	1.07504	1.05816	1.0597	1.06312	1.07169	1.08843	1.09972	1.09889	1.10098	1.10676	1.10348	1.1027	1.09778	1.08275	1.0626	1.04061	1.02061	0.991031	0.970797	0.958796	0.933891	0.919405	0.916787	0.903594	0.892578	0.883966	0.871332	0.86367	0.852439	0.842243	0.83661	0.828528	0.829026
col_cm	1.01143	1.0168	1.02826	1.02571	1.01901	1.02714	1.04143	1.05471	1.05716	1.0667	1.06437	1.06366	1.06543	1.06297	1.07466	1.07211	1.07873	1.07353	1.07213	1.07561	1.06725	1.04908	1.03191	1.01558	0.997729	0.98856	0.974138	0.952419	0.938133	0.925898	0.913009	0.903352	0.891088	0.883072	0.878102	0.870055	0.862254	0.85824	0.851737	0.841335	0.836282
col_cm	1.03458	1.04135	1.0526	1.05851	1.07004	1.06839	1.08045	1.08664	1.09219	1.09595	1.09635	1.09861	1.09445	1.09768	1.10634	1.10454	1.12099	1.14234	1.15117	1.15841	1.15439	1.13131	1.14035	1.13527	1.11319	1.0963	1.07783	1.05655	1.02889	1.01342	1.00261	0.984351	0.975971	0.965728	0.949068	0.936868	0.927902	0.913715	0.902309	0.889493	0.882887
col_cm	1.00574	1.01461	1.033	1.04654	1.05215	1.05353	1.05378	1.05969	1.05806	1.04543	1.05121	1.06297	1.076	1.07819	1.08278	1.09034	1.08542	1.08678	1.07328	1.05732	1.05715	1.04381	1.0265	1.00955	0.983282	0.943415	0.930122	0.92028	0.909074	0.902016	0.893953	0.886122	0.876871	0.873444	0.859373	0.850254	0.830486	0.801365	0.795497	0.792003	0.791217
col_cm	0.98572	0.989386	0.996398	1.00531	1.01268	1.01777	1.02435	1.02507	1.02871	1.02801	1.02735	1.0323	1.03644	1.04153	1.04644	1.04996	1.05867	1.06178	1.05705	1.05219	1.03656	1.02176	0.995363	0.971385	0.952523	0.93433	0.917678	0.897286	0.883203	0.866864	0.858375	0.845932	0.840283	0.831522	0.823846	0.819539	0.810885	0.803191	0.797246	0.791835	0.790983
col_cm	1.00046	1.00792	1.0194	1.02306	1.02585	1.03704	1.03901	1.0489	1.04516	1.04701	1.0434	1.03907	1.03809	1.04194	1.04742	1.05981	1.06911	1.06051	1.05939	1.06959	1.08886	1.09336	1.079	1.02871	1.01823	1.0064	0.994868	0.979674	0.96935	0.952762	0.942828	0.925512	0.913188	0.904687	0.888782	0.875624	0.865792	0.855883	0.842086	0.828495	0.823812
col_cm	1.00808	1.01324	1.02198	1.03309	1.04419	1.04239	1.05038	1.06311	1.07033	1.07358	1.06598	1.05858	1.05867	1.06244	1.06644	1.09835	1.11263	1.11006	1.10187	1.08816	1.06842	1.05389	1.04065	1.02751	1.00609	0.989945	0.974161	0.961261	0.946162	0.928208	0.916105	0.903605	0.892802	0.883407	0.873813	0.864788	0.853158	0.845734	0.842825	0.838373	0.835247
aux_cm	0.911582	0.906657	0.903622	0.899498	0.897417	0.8927	0.888797	0.883717	0.880953	0.874818	0.876423	0.871369	0.867887	0.869565	0.866318	0.865544	0.857242	0.85718	0.85302	0.849892	0.844773	0.835722	0.827384	0.82865	0.825089	0.825233	0.820949	0.817865	0.816912	0.819574	0.822464	0.818179	0.813731	0.812222	0.808793	0.813027	0.811699	0.805904	0.804861	0.802822	0.802366
aux_cm	0.949367	0.947343	0.942533	0.933262	0.922721	0.915435	0.910142	0.9012	0.891689	0.881084	0.882872	0.865013	0.850141	0.845347	0.840914	0.838664	0.844835	0.851296	0.851185	0.848354	0.854749	0.860635	0.863958	0.8648	0.859846	0.862291	0.864973	0.863764	0.861603
aux_cm	0.909415	0.916364	0.909018	0.907917	0.906621	0.900639	0.894478	0.891388	0.891491	0.890739	0.888499	0.885914	0.887937	0.882624	0.879354	0.880097	0.870272	0.865061	0.862023	0.857585	0.854439	0.842603	0.836257	0.835624	0.831869	0.82677	0.832313	0.832992	0.832044	0.83832	0.837058	0.836892	0.829731	0.831325	0.832393	0.834044	0.830271	0.830627	0.824093	0.836107	0.834019
aux_cm	0.899664	0.895172	0.88802	0.885146	0.875532	0.861626	0.850349	0.846029	0.847605	0.849525	0.84517	0.837384	0.840003	0.841139	0.826434	0.84205	0.840846	0.837534	0.841532	0.84084	0.834766	0.841803	0.837995
aux_cm	0.93155	0.931277	0.93278	0.931145	0.933145	0.93182	0.924274	0.917365	0.917757	0.910778	0.906304	0.898293	0.893955	0.891991	0.881795	0.875131	0.870894	0.866213	0.859216	0.8618	0.859413	0.848646	0.844044	0.838642	0.837691	0.825607	0.823876	0.812291	0.809667	0.805287	0.802464	0.799096	0.799303	0.796892	0.794632	0.800185
aux_cm	0.926096	0.928115	0.925247	0.925418	0.923167	0.912969	0.909709	0.911654	0.909432	0.903342	0.900411	0.899645	0.895471	0.89263	0.885859	0.883205	0.877494	0.867322	0.87069	0.87085	0.871967	0.869709	0.869187	0.867731	0.870622	0.868155	0.868725	0.869592	0.872624	0.876417	0.881313	0.885993	0.885238	0.896763	0.898451	0.903052	0.910076	0.903982	0.905257	0.917989	0.921635
pin_cm	0.974757	0.977204	0.983819	0.986377	0.981213	0.985959	0.977287	0.961243	0.955583	0.941886	0.936897	0.92054	0.904492	0.889449	0.88202	0.873172	0.873101	0.875577	0.868686	0.878502	0.884228	0.877184	0.855818	0.846483	0.852658	0.857229
pin_cm	0.995928	1.00406	1.00788	1.01324	1.02186	1.0301	1.03344	1.03841	1.03059	1.02764	1.02376	1.01807	1.01323	0.999916	0.992389	0.987441	0.981416	0.975297	0.962305	0.957275	0.950515	0.945455	0.940902	0.936442	0.934192	0.928145	0.92322	0.92062	0.920119	0.913955	0.913592	0.909831	0.906915	0.909165	0.898305	0.897316	0.89679	0.894383	0.889488	0.879863	0.887997
pin_cm	0.980264	0.986798	0.986053	0.987569	0.990523	0.994705	0.997225	0.987195	0.967616	0.950077	0.934684	0.927078	0.924813	0.918683	0.897349	0.8841	0.872355	0.860418	0.850892	0.842403	0.839187	0.826014	0.820634	0.822376	0.822294	0.817512	0.814595	0.812774	0.810174	0.804557	0.808034	0.807427	0.812403	0.809794	0.807152	0.808556	0.812073	0.812572	0.808758	0.809234	0.811286
pin_cm	0.943915	0.947647	0.949687	0.948305	0.955506	0.950805	0.947937	0.944486	0.943365	0.929845	0.928504	0.920592	0.914476	0.911686	0.896487	0.886877	0.885687	0.877844	0.874	0.870262	0.866846	0.865644	0.855449	0.849061	0.847492	0.846545	0.848518	0.847447	0.849391	0.847785	0.842478	0.843553	0.848746	0.849836	0.850366	0.832839	0.847947	0.845424	0.845247	0.842665	0.842462
pin_cm	0.986726	0.99424	1.00704	1.01143	1.00993	1.00812	1.01193	1.00783	1.0034	0.990229	0.977753	0.967653	0.954912	0.94846	0.935255	0.921949	0.91028	0.904562	0.894866	0.88386	0.870481	0.860978	0.857412	0.852493	0.84446	0.836484	0.833973	0.828955	0.827221	0.825324	0.821123	0.813915	0.815872	0.813353	0.811609	0.80878	0.807953	0.807962	0.813666
pin_cm	0.921118	0.919552	0.920507	0.917601	0.917684	0.913768	0.913671	0.912561	0.903161	0.901554	0.895261	0.891902	0.885385	0.868463	0.861786	0.855427	0.84696	0.835838	0.825424	0.824778	0.826673	0.823687	0.821852	0.818412	0.810155	0.809453	0.797972	0.793812	0.790148	0.79522	0.790435	0.791308	0.789442	0.786214	0.792334	0.790428	0.78727	0.783796	0.778803	0.780919	0.789146
pin_cm	0.898758	0.890138	0.887421	0.884307	0.875522	0.8634	0.862767	0.862999	0.858674	0.856031	0.853068	0.852002	0.844443	0.843373	0.842398	0.837672	0.828515	0.830521	0.834839	0.83521	0.835644	0.836649	0.835811	0.833299	0.838639	0.838058	0.830328	0.840263	0.840997	0.832308	0.837896	0.831132	0.833024	0.834263	0.832307	0.834282
pin_cm	0.942153	0.944848	0.951735	0.952953	0.958014	0.963412	0.964815	0.967417	0.964384	0.966225	0.9629	0.960745	0.955787	0.943482	0.93373	0.921681	0.901749	0.885168	0.876694	0.869854	0.85483	0.849035	0.843979	0.83529	0.832242	0.821967	0.816786	0.808607	0.805301	0.797765	0.793825	0.795919	0.793237	0.786866	0.784433	0.780205	0.778914	0.775294	0.77499	0.77602	0.773394
pin_cm	0.965222	0.975785	0.979934	0.982511	0.981181	0.978075	0.981636	0.97447	0.973968	0.971112	0.962645	0.959615	0.951648	0.944643	0.939068	0.928397	0.923599	0.914505	0.908073	0.90071	0.896173	0.897707	0.891915	0.890233	0.88762	0.885845	0.883676	0.87716	0.874562	0.870502	0.86691	0.865936	0.858832	0.859004	0.857018	0.856763	0.853406	0.858119	0.855019	0.851827	0.853621
pin_cm	0.955103	0.957288	0.961005	0.968321	0.966677	0.965853	0.968536	0.965595	0.966125	0.969356	0.970107	0.964231	0.949138	0.947029	0.942897	0.939387	0.930564	0.925709	0.916817	0.912156	0.904753	0.900159	0.890098	0.886008	0.884911	0.876949	0.874135	0.867631	0.861667	0.857651	0.85286	0.853182	0.845718	0.846946	0.84519	0.840613	0.840239	0.83929	0.837357	0.835079	0.833131
auxpin_cm	0.931542	0.928513	0.933738	0.926899	0.925546	0.925542	0.922424	0.9226	0.914363	0.908772	0.90635	0.908149	0.899041	0.889595	0.883622	0.883925	0.879334	0.877498	0.868697	0.860838	0.857615	0.851761	0.844705	0.841191	0.836244	0.827905	0.823803	0.816118	0.807052	0.805678	0.796042	0.795519	0.802996	0.801733	0.805746	0.805042	0.806831	0.80639	0.80987	0.816071	0.814729
auxpin_cm	0.955707	0.961342	0.96182	0.973261	0.969359	0.969087	0.971914	0.961979	0.957277	0.962464	0.958171	0.954185	0.951007	0.945949	0.941858	0.941088	0.934349	0.932447	0.925622	0.923881	0.911661	0.900364	0.897064	0.88993	0.884065	0.876545	0.871904	0.864325	0.85775	0.851407	0.847448	0.837635	0.830309	0.820684	0.816275	0.812251	0.806918	0.800684	0.797907	0.793941	0.794401
auxpin_cm	0.964776	0.965479	0.962215	0.958701	0.953466	0.953539	0.949286	0.936053	0.930891	0.922093	0.914936	0.904531	0.888103	0.876333	0.864637	0.850367	0.85059	0.856627	0.862991	0.863561	0.860747	0.861669	0.865677	0.862536	0.862586	0.834763
auxpin_cm	0.925296	0.920977	0.926888	0.931402	0.930963	0.923168	0.918593	0.915697	0.913755	0.914927	0.911928	0.904754	0.900056	0.889168	0.886052	0.881523	0.880404	0.875201	0.866697	0.86388	0.861817	0.855959	0.848613	0.841698	0.835226	0.831921	0.830618	0.824976	0.820046	0.821702	0.817758	0.819719	0.816782	0.816783	0.815657	0.81549	0.812606	0.812618	0.810464	0.80463	0.810171
auxpin_cm	0.937668	0.93992	0.943247	0.946199	0.944729	0.944492	0.947757	0.95832	0.95535	0.953988	0.952246	0.955528	0.956632	0.955024	0.950059	0.949078	0.944221	0.936908	0.93456	0.931092	0.926075	0.921878	0.914796	0.907516	0.895706	0.895758	0.893368	0.898124	0.889348	0.887664	0.884768	0.880643	0.876366	0.87483	0.869358	0.862885	0.859424	0.855809	0.854995	0.848646	0.84461
auxpin_cm	0.923247	0.922003	0.921253	0.928224	0.930412	0.92431	0.92333	0.918313	0.913113	0.905729	0.90064	0.904025	0.894252	0.892762	0.884895	0.878518	0.88339	0.877744	0.872377	0.865878	0.858442	0.857964	0.85423	0.853829	0.850489	0.844969	0.842591	0.833964	0.832792	0.829049	0.823023	0.821398	0.813429	0.80459	0.802405	0.798707	0.799033	0.790849	0.790252	0.791877	0.790514
auxpin_cm	0.938084	0.938086	0.938579	0.947575	0.943269	0.93667	0.936531	0.929416	0.925821	0.920618	0.915625	0.909847	0.904545	0.897517	0.892768	0.884797	0.879128	0.881333	0.873831	0.869057	0.865254	0.861663	0.859016	0.856721	0.850064	0.843667	0.839638	0.832747	0.830323	0.82966	0.825542	0.823094	0.819528	0.820882	0.824353	0.8254	0.827918	0.830482	0.831224	0.832383	0.835796
auxpin_cm	0.916679	0.91693	0.917628	0.910503	0.912111	0.905143	0.899663	0.892016	0.889665	0.883613	0.871319	0.879438	0.878397	0.879541	0.87043	0.867876	0.862423	0.855101	0.853983	0.851407	0.843887	0.842733	0.835356	0.836261	0.835402	0.832197	0.829242	0.826664	0.822796	0.820265	0.81224	0.809215	0.807347	0.806036	0.80974	0.807129	0.805864	0.804312	0.805473	0.803651	0.806632
auxpin_cm	0.950095	0.960059	0.964821	0.97462	0.986143	0.992896	0.992893	0.994779	0.995413	0.993725	0.98875	0.981672	0.978456	0.975813	0.976575	0.972609	0.971779	0.963851	0.954547	0.94111	0.930737	0.925571	0.913034	0.904604	0.902182	0.902168	0.898077	0.88818	0.883352	0.87258	0.865561	0.855472	0.849232	0.841808	0.837639	0.837513	0.825492	0.823474	0.827038	0.822168	0.811163
auxpin_cm	0.934758	0.940543	0.939807	0.941669	0.946359	0.941623	0.938302	0.933411	0.931945	0.929839	0.92376	0.922171	0.921973	0.920627	0.92096	0.916529	0.909189	0.906619	0.903039	0.89564	0.88976	0.883253	0.878649	0.878111	0.874052	0.867585	0.864697	0.863963	0.862874	0.857466	0.852092	0.845504	0.840941	0.835683	0.831795	0.827714	0.821628	0.813488	0.803825	0.801709	0.797059
auxpin_cm	0.916984	0.9113	0.913171	0.913246	0.920215	0.922951	0.917046	0.902403	0.877731	0.857104
auxpin_cm	0.961376	0.963162	0.964572	0.955249	0.936316	0.947045	0.950405	0.952133	0.939465	0.954038	0.947778	0.946313	0.93762	0.929767	0.915721	0.899399	0.890073	0.884381	0.872031	0.863732	0.865304	0.855509	0.848584	0.840138	0.832443	0.833968	0.836961	0.815683	0.801775	0.792454	0.790585	0.789355	0.789637	0.788329	0.792884	0.787384	0.795019	0.798348
col_iaa	1.0196	1.03082	1.04023	1.04421	1.05273	1.07004	1.08471	1.09667	1.10439	1.10713	1.10776	1.11304	1.12163	1.12526	1.13351	1.15166	1.16201	1.21508	1.22052	1.23297	1.24298	1.25373	1.24325	1.23379	1.22435	1.20918	1.19415	1.17863	1.15116	1.13452	1.11581	1.09953	1.08575	1.07123	1.05524	1.04384	1.03087	1.01924	1.00853	0.996075	0.979558
col_iaa	1.05268	1.06005	1.06813	1.07644	1.08813	1.0999	1.11105	1.11639	1.12246	1.12944	1.13282	1.14995	1.16562	1.1789	1.19739	1.22355	1.23899	1.25041	1.25197	1.27544	1.2608	1.26945	1.26149	1.24191	1.21535	1.18714	1.16165	1.14655	1.12525	1.10886	1.09516	1.0839	1.07294	1.06857	1.0578	1.04962	1.04309	1.03516	1.02942	1.0177	1.01471
col_iaa	1.02661	1.03601	1.04773	1.0596	1.06775	1.07082	1.06922	1.0785	1.08852	1.09264	1.10289	1.13913	1.15576	1.177	1.19797	1.21155	1.22524	1.23018	1.23362	1.22258	1.2073	1.18691	1.16783	1.15588	1.13682	1.12492	1.11039	1.10066	1.09153	1.08303	1.07497	1.06811	1.0558	1.04286	1.03611	1.01983	1.01189	1.00598	1.0003	0.993602	0.984955
col_iaa	1.0139	1.02341	1.03237	1.03704	1.04304	1.05677	1.06664	1.05479	1.05155	1.05523	1.07638	1.08607	1.08688	1.12597	1.13632	1.16253	1.18333	1.15564	1.14798	1.14764	1.15361	1.14496	1.14025	1.13362	1.13051	1.17191	1.16435	1.14468	1.12199	1.102	1.08317	1.07187	1.05071	1.03805	1.02725	1.01254	1.00384	0.991389	0.979843	0.970494	0.957222
col_iaa	1.03318	1.03659	1.03931	1.03918	1.02027	1.07269	1.07913	1.09109	1.10649	1.10822	1.12762	1.13105	1.14471	1.16229	1.17269	1.18431	1.18165	1.17986	1.17121	1.16017	1.14307	1.12236	1.10654	1.08788	1.07352	1.05993	1.0474	1.03184	1.01849	1.00484	0.992674	0.984873	0.973231	0.964172	0.954891	0.948138	0.945635	0.940106	0.934126	0.929207	0.927484
col_iaa	1.10463	1.10576	1.11147	1.11367	1.12089	1.12355	1.12768	1.1303	1.13009	1.13074	1.12748	1.14132	1.14167	1.14117	1.1408	1.14341	1.13866	1.13509	1.12791	1.1152	1.10026	1.076	1.06292	1.04858	1.03527	1.02089	1.01785	1.00881	0.992616	0.966433	0.962183	0.957692	0.947504	0.946245	0.937674	0.9375	0.930664	0.926369	0.922405	0.914121	0.907389
col_iaa	1.03197	1.04229	1.04813	1.04888	1.06202	1.07106	1.08562	1.09234	1.0914	1.09344	1.09345	1.09898	1.10812	1.11474	1.11911	1.1359	1.14186	1.1582	1.15541	1.14909	1.13543	1.11819	1.09367	1.07758	1.04684	1.02005	0.998446	0.976587	0.959727	0.946698	0.930464	0.926494	0.913548	0.912679	0.901141	0.903364	0.896179	0.894712	0.89149	0.886715	0.888893
col_iaa	1.06053	1.06476	1.0746	1.0836	1.09455	1.1072	1.10644	1.10294	1.12976	1.13766	1.11591	1.11517	1.11908	1.11996	1.12346	1.12408	1.12586	1.11784	1.11733	1.10497	1.08481	1.06953	1.05034	1.03352	1.02002	1.0022	0.982696	0.968729	0.956292	0.948914	0.933626	0.929084	0.919144	0.903384	0.901072	0.898047	0.893447	0.891191	0.892141	0.892019	0.890279
col_iaa	1.1021	1.10948	1.11663	1.13017	1.14	1.14464	1.14996	1.16022	1.1632	1.16761	1.17231	1.18173	1.18702	1.18578	1.19481	1.20296	1.20277	1.20044	1.18892	1.17	1.15015	1.12689	1.10188	1.07697	1.05757	1.03956	1.01701	0.994655	0.979152	0.965309	0.950153	0.934889	0.923075	0.91971	0.911083	0.910249	0.904682	0.903266	0.900555	0.898821	0.895394
col_iaa	1.05469	1.05619	1.06331	1.07123	1.08696	1.09495	1.10396	1.1108	1.11387	1.12196	1.11909	1.13154	1.14123	1.15621	1.1683	1.1415	1.12013	1.10852	1.07104	1.05997	1.09654	1.12	1.11264	1.11543	1.08443	1.05627	1.02349	0.991674	0.967367	0.948561	0.933014	0.917063	0.905315	0.898766	0.893729	0.889373	0.881877	0.881781	0.880557	0.882193	0.877219
col_iaa	1.04951	1.06223	1.06759	1.07338	1.08657	1.10477	1.11454	1.11574	1.12167	1.11101	1.10654	1.10431	1.09503	1.09852	1.11442	1.15147	1.17449	1.16124	1.11646	1.1118	1.11717	1.09505	1.04306	1.0939	1.08568	1.06524	1.05297	1.03585	1.02741	1.016	1.0001	0.989767	0.97444	0.959025	0.948818	0.937863	0.923751	0.914921	0.908999	0.899526	0.892827
col_iaa	1.0714	1.07887	1.08434	1.09626	1.10897	1.11857	1.12891	1.14482	1.15595	1.1623	1.15414	1.14528	1.14611	1.14865	1.1288	1.12108	1.12401	1.11706	1.12761	1.13172	1.13763	1.13907	1.13413	1.12476	1.11275	1.09761	1.07851	1.0553	1.04072	1.02339	1.00581	0.992505	0.977822	0.960491	0.945515	0.937384	0.926121	0.912453	0.901215	0.893405	0.885395
col_iaa	1.04052	1.04411	1.04991	1.05819	1.06639	1.07764	1.08418	1.08719	1.09035	1.09376	1.09623	1.09087	1.09231	1.09689	1.10556	1.11615	1.12423	1.14743	1.15858	1.16927	1.16951	1.16487	1.1588	1.1474	1.12937	1.10665	1.09476	1.07824	1.05868	1.03991	1.01873	1.00546	0.991746	0.979102	0.967406	0.954472	0.948004	0.931066	0.922189	0.910156	0.898753
col_iaa	0.996401	1.00217	1.00869	1.01172	1.02028	1.02507	1.02257	1.02511	1.02777	1.04088	1.05233	1.05577	1.05518	1.06565	1.06993	1.07123	1.08281	1.09063	1.09675	1.09431	1.08151	1.06954	1.04002	1.02009	1.00187	0.981841	0.966758	0.945899	0.928019	0.904126	0.888197	0.8765	0.863743	0.855706	0.848919	0.841785	0.838324	0.836281	0.841046	0.835754	0.83174
col_iaa	1.00328	1.01598	1.02725	1.03661	1.03728	1.0459	1.04147	1.03877	1.04077	1.05185	1.05409	1.07248	1.07718	1.08138	1.08861	1.09115	1.09802	1.10269	1.10554	1.09944	1.08372	1.06049	1.03959	1.01595	0.997292	0.97475	0.955118	0.936872	0.919526	0.899894	0.886944	0.876397	0.865847	0.857145	0.848241	0.838736	0.832792	0.837401	0.834024	0.834093	0.834835
col_iaa	0.978197	0.987682	0.98741	0.992435	0.997866	1.00327	1.01084	1.01621	1.02756	1.03834	1.04748	1.0598	1.07484	1.08614	1.10113	1.11646	1.12627	1.12917	1.12634	1.11815	1.10236	1.07895	1.06425	1.04498	1.03019	1.01378	0.999555	0.988865	0.975468	0.963498	0.95656	0.948066	0.9413	0.934931	0.929694	0.919806	0.92211	0.911657	0.913905	0.914635	0.910784
col_iaa	1.02218	1.03034	1.04015	1.0449	1.04424	1.06032	1.06301	1.0767	1.08963	1.1118	1.13758	1.14492	1.14002	1.13382	1.13183	1.12021	1.09328	1.08127	1.06564	1.04637	1.02412	1.01906	0.997176	0.980909	0.967337	0.954915	0.94894	0.94336	0.94446	0.943366	0.938956	0.940519	0.937142	0.935497	0.932786	0.927616	0.92768	0.927975	0.926956	0.913287	0.916995
col_iaa	1.01302	1.02009	1.03116	1.03792	1.04626	1.05622	1.06933	1.07157	1.07913	1.08603	1.07988	1.08034	1.094	1.10352	1.09637	1.11313	1.12594	1.14283	1.16537	1.18642	1.19756	1.20292	1.1957	1.18337	1.16833	1.14596	1.12965	1.11324	1.09677	1.08225	1.07077	1.05639	1.04491	1.03426	1.02181	1.00846	1.00114	0.994879	0.989758	0.979479	0.976034
col_iaa	1.00981	1.01572	1.01623	1.02787	1.02985	1.04264	1.0479	1.05304	1.05873	1.06723	1.07136	1.07699	1.08958	1.09907	1.11608	1.13106	1.11299	1.1314	1.15388	1.16734	1.18413	1.18489	1.17237	1.16285	1.14543	1.13219	1.11274	1.09093	1.07933	1.06742	1.05316	1.0469	1.04145	1.02851	1.01796	1.00991	0.993582	0.988479	0.984956	0.982087	0.976096
aux_iaa	0.90512	0.818367	0.815137	0.810853	0.810309	0.804675	0.798207	0.788834	0.78732	0.783259	0.780891	0.782888	0.777142	0.770559	0.764895	0.764658	0.762652	0.758287	0.758653	0.758702	0.757331	0.751037	0.751563	0.748681	0.749312	0.746983	0.746384	0.746007	0.743188	0.738077	0.733603	0.729955	0.734341	0.73054	0.73152	0.733863	0.73359	0.732775	0.733927	0.733962	0.733347
aux_iaa	0.834488	0.839574	0.837084	0.834687	0.841852	0.837713	0.832559	0.82845	0.828022	0.818066	0.815766	0.811953	0.807512	0.797405	0.791164	0.779236	0.772428	0.768692	0.762994	0.759256	0.757189	0.7511	0.744329	0.745123	0.740046	0.735929	0.735692	0.733736	0.735774	0.735914	0.742771	0.737586	0.739589	0.740353	0.741711	0.740542	0.742495	0.750314	0.752391	0.747635	0.746178
aux_iaa	0.880634	0.879071	0.879819	0.876673	0.875007	0.871867	0.867563	0.862905	0.86025	0.856955	0.853105	0.847053	0.843183	0.836178	0.83707	0.826958	0.822039	0.819253	0.818588	0.821597	0.817485	0.81442	0.814001	0.812409	0.81247	0.812558	0.814234	0.816982	0.819696	0.822619	0.827786	0.824202	0.82965	0.834402	0.839736	0.842365	0.843926	0.844907	0.848128	0.846703	0.851417
aux_iaa	0.875062	0.877003	0.878758	0.881784	0.876742	0.87995	0.880124	0.866085	0.860164	0.853294	0.847439	0.843094	0.831211	0.828945	0.819245	0.811082	0.805963	0.805765	0.799742	0.797215	0.794331	0.78801	0.788984	0.785765	0.782592	0.780642	0.776786	0.779423	0.778966	0.778116	0.780802	0.780729	0.783184	0.784041	0.783329	0.78227	0.783399	0.788072	0.784809	0.783159	0.780772
aux_iaa	0.877566	0.880091	0.879666	0.891304	0.894728	0.890608	0.893531	0.88629	0.883297	0.879553	0.872153	0.865672	0.860445	0.858944	0.859046	0.855998	0.852739	0.852371	0.850117	0.843173	0.839504	0.839655	0.839031	0.833077	0.829506	0.825021	0.826347	0.821944	0.818975	0.823052	0.819516	0.807227	0.80757	0.808359	0.807683	0.800988	0.806371	0.800986	0.804646	0.806044	0.804724
aux_iaa	0.864852	0.869927	0.869338	0.874921	0.873207	0.873085	0.875995	0.868024	0.865415	0.862851	0.858072	0.856514	0.85316	0.851977	0.84427	0.842734	0.837726	0.834469	0.834845	0.829968	0.825721	0.824707	0.823764	0.820269	0.820096	0.817811	0.818726	0.814101	0.816785	0.81276	0.809664	0.8091	0.810012	0.806358	0.803418	0.798579	0.796902	0.794215	0.792164	0.78982	0.787903
aux_iaa	0.932343	0.93873	0.941223	0.937884	0.941683	0.942193	0.942214	0.943921	0.946142	0.950952	0.955504	0.953757	0.958054	0.953282	0.952376	0.951745	0.945831	0.944566	0.943911	0.941576	0.942423	0.934529	0.93506	0.932322	0.927545	0.923839	0.920705	0.914957	0.910992	0.90299	0.900718	0.895956	0.88949	0.887007	0.880411	0.876037	0.876416	0.866859	0.861509	0.859192	0.853719
aux_iaa	0.903244	0.897787	0.895107	0.894189	0.888489	0.888876	0.888653	0.88344	0.890011	0.891958	0.893464	0.888825	0.888827	0.88779	0.889287	0.885265	0.887764	0.887381	0.884728	0.881085	0.875935	0.874321	0.874584	0.86987	0.871068	0.869621	0.867745	0.866442	0.869956	0.870279	0.864737	0.865768	0.867074	0.86618	0.868821	0.866788	0.86501	0.860178	0.85937	0.858896	0.856141
aux_iaa	0.997329	1.00885	1.00914	1.01496	1.01409	1.01702	1.01672	1.01223	1.00986	1.00784	1.00389	0.997952	0.991893	0.984385	0.98009	0.976563	0.97069	0.968423	0.965278	0.962173	0.955286	0.952372	0.947513	0.944127	0.940929	0.934249	0.930373	0.926252	0.927336	0.922813	0.917997	0.915696	0.90862	0.904272	0.900601	0.896053	0.894133	0.894149	0.892521	0.893205	0.885949
pin_iaa	1.01361	1.01912	1.0295	1.04502	1.05108	1.06026	1.06435	1.07063	1.08036	1.08333	1.08433	1.08496	1.08707	1.08381	1.07749	1.07298	1.05316	1.05106	1.04358	1.03457	1.02908	1.02378	1.02301	1.01541	1.01128	1.00729	1.00217	0.993578	0.992893	0.9829	0.976378	0.967409	0.964587	0.961144	0.953673	0.952679	0.948258	0.949503	0.941155	0.934888	0.935845
pin_iaa	0.995411	0.999197	1.00438	1.01369	1.02557	1.03144	1.03842	1.04798	1.05363	1.05582	1.05242	1.04133	1.03205	1.01717	1.00208	0.993264	0.984463	0.975835	0.965126	0.957804	0.953438	0.948418	0.941277	0.939933	0.933683	0.929501	0.924191	0.924171	0.92097	0.919128	0.919322	0.917474	0.918456	0.89947	0.916225	0.921546	0.920272	0.91479	0.89597	0.902087	0.920905
pin_iaa	1.0167	1.0321	1.03432	1.04604	1.05099	1.05887	1.06785	1.06958	1.07376	1.07039	1.07616	1.07253	1.06776	1.06818	1.06131	1.05181	1.03675	1.02661	1.01971	1.01224	1.0081	1.0032	0.99502	0.989336	0.967348	0.925051	0.931386	0.956072	0.947666	0.94626	0.937495	0.930837	0.926344	0.918196	0.91273	0.911728	0.910149	0.914395	0.916333	0.910908	0.906878
pin_iaa	0.950977	0.956245	0.963958	0.970298	0.973241	0.973769	0.98019	0.974741	0.967739	0.9602	0.951367	0.939826	0.931084	0.921571	0.904694	0.899204	0.887086	0.877926	0.867446	0.863086	0.861805	0.850279	0.847319	0.84481	0.846402	0.847645	0.852353	0.859611	0.86084	0.866697	0.865863	0.86846	0.86486	0.865855	0.847923	0.870198	0.868814	0.861529	0.868931	0.867257	0.862859
pin_iaa	0.95351	0.944535	0.930408	0.914771	0.909165	0.908123	0.898576	0.883046	0.843812	0.822588	0.812994	0.806414	0.797919	0.794124	0.779063	0.780928	0.778191	0.776742	0.773364	0.766033	0.765338	0.767784	0.766822	0.761441
pin_iaa	0.905914	0.907789	0.91053	0.913029	0.919822	0.921452	0.913772	0.906263	0.903464	0.893377	0.889764	0.889774	0.89373	0.888286	0.886014	0.88029	0.879922	0.877123	0.873119	0.867703	0.862615	0.857386	0.850794	0.850818	0.844804	0.839457	0.83787	0.840305	0.829785	0.825327	0.816889	0.813846	0.807259	0.797593	0.792089	0.788964	0.781538	0.773273	0.766531	0.767386	0.765003
pin_iaa	0.915634	0.906823	0.90696	0.899819	0.898216	0.896659	0.899674	0.902404	0.900435	0.899986	0.903323	0.902009	0.894288	0.88673	0.886116	0.878019	0.881045	0.890095	0.895737	0.882303
pin_iaa	0.970112	0.972154	0.982175	0.990542	0.998474	1.00673	1.0043	1.00856	1.01476	1.01595	1.01935	1.02443	1.02673	1.02255	1.02372	1.01718	1.00123	0.990085	0.984976	0.97722	0.976077	0.968383	0.955269	0.951169	0.950335	0.94037	0.935654	0.935058	0.932471	0.929428	0.925557	0.921533	0.918504	0.913265	0.908181	0.90124	0.898707	0.900489	0.895597	0.898012	0.888701
pin_iaa	1.01617	1.02324	1.03536	1.04836	1.06458	1.07738	1.08894	1.09242	1.08966	1.0886	1.09206	1.09074	1.09075	1.09017	1.09202	1.08352	1.07639	1.07645	1.06956	1.06258	1.05435	1.05272	1.04701	1.03982	1.03318	1.02679	1.02931	1.02548	1.01426	1.00794	1.00896	1.00542	1.00466	0.998025	0.989963	0.985579	0.983433	0.981154	0.972884	0.967653	0.963916
pin_iaa	0.997935	1.00723	1.01825	1.02536	1.03328	1.04288	1.04646	1.04613	1.04088	1.04304	1.03961	1.03657	1.02996	1.02512	1.01702	1.00548	0.994849	0.986367	0.980371	0.970625	0.960981	0.954608	0.949025	0.938178	0.932664	0.923536	0.917362	0.911769	0.911882	0.902756	0.895311	0.892108	0.881719	0.871708	0.866882	0.864768	0.861152	0.854819	0.84519	0.834416	0.839162
pin_iaa	1.00967	1.00913	1.01691	1.0261	1.03889	1.05717	1.06288	1.06971	1.07057	1.0707	1.06916	1.06947	1.07031	1.06712	1.05799	1.05053	1.04643	1.03937	1.02945	1.01882	1.00863	1.00491	0.9999	0.992345	0.987178	0.98308	0.973351	0.968256	0.966994	0.962765	0.957832	0.956369	0.948422	0.94478	0.938752	0.936261	0.928583	0.92676	0.927384	0.922886	0.92492
auxpin_iaa	1.023	1.02655	1.02866	1.02976	1.03512	1.03246	1.02743	1.0342	1.03416	1.02761	1.01965	1.01648	1.01105	1.01045	1.00813	1.0023	1.005	1.00968	1.00814	1.00311	0.998367	0.992064	0.986751	0.983023	0.976884	0.969939	0.967552	0.964427	0.95347	0.951589	0.94175	0.938558	0.931958	0.927379	0.919171	0.912002	0.912806	0.900243	0.895472	0.887813	0.887878
auxpin_iaa	0.956555	0.960149	0.964344	0.966379	0.968448	0.970263	0.972946	0.974619	0.975599	0.975447	0.977942	0.988327	0.985493	0.98044	0.981656	0.977783	0.97234	0.966856	0.959697	0.958866	0.95294	0.950253	0.938629	0.927321	0.923812	0.919053	0.909886	0.901283	0.89826	0.891988	0.884774	0.882021	0.882194	0.870651	0.870421	0.872154
auxpin_iaa	0.976022	0.973553	0.979112	0.9781	0.976861	0.976345	0.965783	0.967107	0.963393	0.961261	0.95392	0.953976	0.945343	0.94108	0.934966	0.931141	0.925306	0.917394	0.917194	0.908318	0.907673	0.900532	0.895734	0.890244	0.882596	0.876925	0.875502	0.873134	0.864387	0.859882	0.854717	0.851093	0.843387				0.840988	0.842207	0.846419
auxpin_iaa	0.984009	0.993229	0.997046	1.00493	1.00746	1.01234	1.02301	1.02878	1.03282	1.02167	1.0201	1.02263	1.01505	1.01092	1.00834	1.00774	1.00366	0.997847	0.997813	0.999439	0.988486	0.982805	0.975398	0.973793	0.966095	0.958208	0.960469	0.953105	0.941223	0.937572	0.935357	0.933466	0.929246	0.924141	0.917179	0.908802	0.905564	0.905037	0.896916	0.890121	0.883827
auxpin_iaa	0.969315	0.970054	0.97314	0.97598	0.979033	0.979088	0.980439	0.979297	0.982049	0.98313	0.980964	0.972814	0.968409	0.958477	0.96777	0.975938	0.979261	0.977499	0.976453	0.97941	0.974876	0.974819	0.971083	0.974736	0.976827	0.982098	0.979888	0.981576	0.983339	0.98505	0.987941	0.988255	0.986088	0.985987	0.989148	0.985545	0.988431	0.994439	0.99203	0.993547	0.990886
auxpin_iaa	0.918063	0.913228	0.913728	0.911607	0.906286	0.902014	0.899246	0.889809	0.887605	0.876942	0.870343	0.861787	0.862381	0.85359	0.849651	0.845311	0.839954	0.841436	0.842836	0.83888	0.836682	0.838633	0.840228	0.837312	0.83866	0.840028	0.842593	0.840212	0.844776	0.841848	0.841111	0.837825	0.839611	0.825128
auxpin_iaa	0.920094	0.921157	0.926443	0.919938	0.915321	0.9116	0.911211	0.907636	0.902937	0.907282	0.90811	0.902151	0.901732	0.893465	0.89528	0.890319	0.884164	0.881985	0.876605	0.875166	0.874897	0.87452	0.876635	0.871075	0.868259	0.865379	0.8693	0.867198	0.867755	0.864799	0.860715	0.859419	0.864644	0.861039	0.853128	0.854183	0.851482	0.85054	0.845296
auxpin_iaa	0.970988	0.967962	0.963114	0.968052	0.96464	0.963302	0.95781	0.953168	0.948499	0.941382	0.935628	0.923768	0.913255	0.905544	0.892671	0.883492	0.876587	0.867352	0.861786	0.858701	0.854875	0.850962	0.855368
auxpin_iaa	0.919173	0.920535	0.924553	0.921771	0.922497	0.918137	0.916651	0.909459	0.903212	0.878421	0.891706	0.888379	0.881609	0.885359	0.877264	0.878257	0.880516	0.879604	0.875908	0.866938	0.872542	0.865214	0.863399	0.845423	0.843716	0.845604	0.845684	0.850578	0.854904	0.854752	0.859832	0.8682	0.870006
auxpin_iaa	0.980357	0.984268	0.995401	0.999795	1.00406	1.00316	1.00939	1.0111	1.00947	1.00953	1.01226	1.01005	1.01393	1.01822	1.02342	1.02632	1.02153	1.0211	1.01749	1.00902	1.00492	0.998889	0.997981	0.988709	0.982367	0.978549	0.974636	0.963007	0.957979	0.955344	0.953323	0.951041	0.942998	0.941919	0.942967	0.939851	0.933705	0.92594	0.924939	0.920134	0.912697
auxpin_iaa	0.971904	0.97531	0.979719	0.985888	0.992675	0.998942	1.00186	0.998543	0.999207	0.997132	0.994299	0.989991	0.988784	0.981044	0.978773	0.974243	0.969107	0.966198	0.961279	0.955653	0.95467	0.947428	0.93618	0.931048	0.925239	0.917425	0.911924	0.902714	0.891918	0.889521	0.883775	0.879652	0.877267	0.873898	0.872128	0.867567	0.870515	0.867436	0.865177	0.863298	0.8635

## Sheet: S3b
distance from root tip (µm)	0	20	40	60	80	100	120	140	160	180	200	220	240	260	280	300	320	340	360	380	400	420	440	460	480	500	520	540	560	580	600	620	640	660	680	700	720	740	760	780	800
col_iaa	0.0534451	0.0573087	0.0578284	0.0487615	0.0578401	0.064594	0.0749186	0.0777875	0.0874773	0.0926725	0.0932949	0.104686	0.109115	0.107395	0.121523	0.134047	0.133496	0.121372	0.120807	0.13611	0.144343	0.140464	0.163674	0.177259	0.185005	0.204899	0.2076	0.211858	0.218771	0.226436	0.237448	0.225245	0.240714	0.261687	0.256574	0.251397	0.262604	0.2697	0.254281	0.236426	0.230028
col_iaa	0.0359074	0.0434063	0.049166	0.0515528	0.0537902	0.051056	0.0573627	0.0502454	0.0528163	0.0449263	0.0709969	0.0886629	0.0860891	0.105524	0.125514	0.143916	0.135829	0.128805	0.120632	0.113623	0.113997	0.127625	0.125861	0.131072	0.143313	0.155422	0.16187	0.158708	0.165455	0.174409	0.180027	0.174369	0.18526	0.185138	0.188191	0.181135	0.180976	0.171334	0.180196	0.174416	0.183374
col_iaa	0.0243364	0.00659454	-0.00346845	0.009048	0.0248891	0.0232773	0.0132355	0.0155853	0.00958062	0.0268175	0.0225265	0.0287749	0.0336167	0.0491429	0.0435502	0.0905811	0.113853	0.110092	0.115332	0.1126	0.099884	0.0801968	0.0967796	0.121011	0.122213	0.129382	0.168821	0.176059	0.176728	0.179189	0.180383	0.188493	0.205551	0.196085	0.167277	0.199157	0.210888	0.193091	0.191576	0.195614	0.196505
col_iaa	0.0335493	0.0389321	0.0445854	0.0505159	0.0554905	0.039376	-0.0168832	0.00240904	0.0344388	0.0717085	0.0922759	0.0953702	0.106038	0.121573	0.119977	0.119358	0.115874	0.104569	0.0972625	0.0940719	0.10301	0.0987024	0.105102	0.0883505	0.0813761	0.11985	0.145317	0.167195	0.17055	0.167539	0.175145	0.170219	0.183854	0.193753	0.187454	0.183956	0.1931	0.184958	0.178126	0.182197	0.178659
col_iaa	0.0455112	0.0512346	0.0579794	0.0596524	0.0668856	0.0643948	0.0636297	0.0705473	0.0617612	0.06234	0.0737332	0.0919404	0.103475	0.117476	0.134711	0.144469	0.132643	0.109528	0.124844	0.140573	0.145066	0.150525	0.157998	0.174858	0.169672	0.17436	0.188089	0.203191	0.216812	0.226076	0.224174	0.226834	0.230051	0.243279	0.234123	0.238493	0.239915	0.243151	0.238194	0.239278	0.239315
col_iaa	0.0108089	0.0318504	0.0354355	0.0439525	0.0531374	0.0512046	0.0657702	0.0747066	0.0768311	0.0787244	0.105674	0.116155	0.128524	0.126064	0.142837	0.142072	0.129351	0.116504	0.108905	0.111921	0.115771	0.112861	0.118495	0.131046	0.119448	0.1286	0.139784	0.151189	0.155499	0.162921	0.17252	0.169297	0.179952	0.18275	0.176608	0.184023	0.179969	0.183325	0.182829	0.181662	0.175151
col_iaa	0.0503867	0.0489196	0.0417282	0.0387946	0.0417736	0.0517901	0.054814	0.0502964	0.0680601	0.0756527	0.0813944	0.0793248	0.0556182	0.0601918	0.0649525	0.0592481	0.0604539	0.0477884	0.0411624	0.0506728	0.0588882	0.0639199	0.0839104	0.0864631	0.093971	0.104399	0.112882	0.119957	0.136359	0.146181	0.156069	0.179037	0.177836	0.178192	0.195659	0.188896	0.194972	0.202652	0.193591	0.19352	0.197931
col_iaa	-0.000788272	-0.00682864	0.00582625	-0.000902798	0.00950179	0.0163022	0.0187943	0.0321214	0.0350874	0.039222	0.0473065	0.0514646	0.0565364	0.0671211	0.0836535	0.0976813	0.102254	0.0958542	0.0837658	0.0741398	0.0664273	0.0520646	0.0551185	0.05753	0.0638959	0.0554964	0.0600462	0.061536	0.0577267	0.0602731	0.0593628	0.0615422	0.0659126	0.0644632	0.0698978	0.0578404	0.0594154	0.0535295	0.0455968	0.0438891	0.0492024
col_iaa	-0.00673025	-0.00580385	-0.00142422	0.00468209	0.0102859	0.0180898	0.0284971	0.0322575	0.0405029	0.0404002	0.051641	0.0507996	0.0625403	0.0701336	0.0874568	0.096884	0.111401	0.115408	0.114765	0.102724	0.085863	0.0919972	0.0901013	0.0805127	0.0704836	0.0760924	0.0600299	0.0546542	0.0564612	0.0646955	0.0534349	0.0486229	0.044446	0.0302616	0.0299803	0.0407068	0.0291409	0.0262789	0.0279203	0.0296836	0.0288501
col_iaa	-0.0172754	-0.014303	-0.00816436	-0.0134454	-0.00473657	0.00213579	0.00651493	0.0196186	0.0194065	0.0138748	-0.00317802	-0.0364373	-0.00722917	0.0102353	0.0444519	0.0695571	0.0927565	0.0974543	0.108053	0.113121	0.114452	0.116914	0.108806	0.105205	0.103783	0.11351	0.10908	0.108368	0.122637	0.117848	0.109984	0.0981487	0.100969	0.0948048	0.0904698	0.0834907	0.0888587	0.0810521	0.0889085	0.0808115	0.0732252
col_iaa	-0.0190896	-0.0153415	-0.00661743	-0.00284383	-0.00509342	0.00255748	0.005347	-0.0116148	-0.00908235	-0.00170385	0.00237948	-0.00878629	0.000647249	0.0199181	0.0384573	0.0489614	0.0492104	0.0466198	0.0589717	0.0598644	0.0629505	0.0619749	0.0630114	0.0613015	0.0678493	0.0648295	0.0588138	0.0542356	0.0501052	0.0591255	0.0684346	0.0656673	0.0709401	0.0707263	0.074509	0.0641547	0.0604988	0.0648737	0.0562997	0.0576911	0.0544281
col_iaa	-0.0196883	-0.010294	-0.00831338	-0.000376484	0.00321579	0.0162851	0.0238055	0.0282556	0.0270051	0.028918	0.0273164	0.0346087	0.040497	0.0387526	0.0267659	0.0207588	0.0652846	0.0656459	0.0758208	0.0824425	0.0836902	0.0824912	0.0791858	0.104115	0.113932	0.120831	0.116572	0.114288	0.109546	0.0978073	0.102128	0.110721	0.106541	0.101754	0.0996252	0.089231	0.0832524	0.092038	0.0864408	0.0728398	0.0759286
col_iaa	-0.0392871	-0.0723026	-0.0837926	-0.0613007	-0.0408308	-0.0377143	-0.039518	-0.0307712	-0.0362969	-0.0357917	-0.0355272	-0.046537	-0.0540411	-0.0561988	-0.0551564	-0.0515302	-0.0542728	-0.0730271	-0.0789128	-0.0736367	-0.0770545	-0.0797643	-0.0825173	-0.0743757	-0.0721705	-0.0684595	-0.0662073	-0.0675553	-0.0607532	-0.0609502	-0.0589568	-0.0518053	-0.0538451	-0.0569676	-0.0489246	-0.0435167	-0.0467558	-0.0457792	-0.0327133	-0.0311645	-0.0317627
col_iaa	-0.0182906	-0.0144415	-0.0141499	-0.0239026	-0.0329638	-0.0386806	-0.0260591	0.00116654	0.0184567	0.0200693	0.0234773	0.0253965	0.0288884	0.0389152	0.0577279	0.0650201	0.06756	0.0519643	0.0478947	0.0461131	0.0459197	0.0368454	0.0396696	0.0435545	0.0415911	0.0519317	0.043407	0.0429247	0.04593	0.0387508	0.036864	0.025059	0.0318106	0.0190192	0.0142072	0.0162102	0.00631973	0.00352067	0.00519142	0.00938163	0.0101023
col_iaa	0.150428	0.158785	0.165952	0.176574	0.173237	0.167456	0.179706	0.193371	0.201636	0.203795	0.224003	0.233409	0.238692	0.246823	0.270518	0.293581	0.299403	0.309	0.322979	0.331815	0.349711	0.367843	0.386027	0.351572	0.365695	0.387715	0.377931	0.375014	0.365379	0.3628	0.365213	0.35359	0.339519	0.342543	0.353203	0.3462	0.336403	0.328154	0.321929	0.324136	0.315688
col_iaa	0.137429	0.135581	0.161272	0.17466	0.183152	0.207632	0.205854	0.210971	0.233079	0.226186	0.227494	0.210075	0.215302	0.222468	0.25452	0.271175	0.289389	0.280901	0.296648	0.32497	0.355517	0.365608	0.356885	0.389871	0.397974	0.390771	0.382933	0.400862	0.370736	0.361818	0.365389	0.363258	0.369758	0.375135	0.36158	0.349123	0.358918	0.347642	0.329187	0.326138	0.326608
col_iaa	0.127033	0.137628	0.138738	0.137878	0.153421	0.156125	0.162042	0.172832	0.193919	0.19459	0.201868	0.211954	0.234696	0.245624	0.262116	0.291204	0.307346	0.313828	0.289108	0.284518	0.312126	0.31335	0.328047	0.342972	0.332489	0.340443	0.347987	0.340948	0.329307	0.326154	0.321543	0.311886	0.326341	0.333716	0.318785	0.314158	0.321291	0.307443	0.292686	0.28835	0.296771
col_iaa	0.142182	0.145342	0.156776	0.159364	0.159713	0.160599	0.167855	0.177676	0.199103	0.202163	0.187321	0.10339	0.132925	0.246341	0.286278	0.286499	0.294525	0.298871	0.302156	0.313412	0.302578	0.305822	0.300775	0.295248	0.299824	0.304174	0.308486	0.308743	0.297113	0.289342	0.280054	0.270695	0.266868	0.256172	0.273318	0.26661	0.245665	0.225023	0.219459	0.228196	0.242493
col_iaa	0.129857	0.0675001	0.0608856	0.094572	0.0978747	0.127303	0.153744	0.184971	0.183486	0.188624	0.202065	0.215008	0.236332	0.243537	0.249094	0.262643	0.279775	0.295184	0.304817	0.313847	0.322129	0.338333	0.352273	0.327214	0.320531	0.324002	0.333892	0.34194	0.335617	0.317785	0.289342	0.290057	0.296533	0.270002	0.265381	0.265432	0.254952	0.241679	0.233485	0.2496	0.246199
col_iaa	0.12074	0.114382	0.111756	0.137333	0.148518	0.140909	0.155488	0.169598	0.166048	0.186436	0.173195	0.177166	0.193759	0.214573	0.230445	0.278015	0.318307	0.320302	0.325051	0.341562	0.337375	0.327557	0.270533	0.199988	0.262228	0.329581	0.310633	0.306283	0.305832	0.32845	0.310708	0.30149	0.295986	0.285732	0.290287	0.289268	0.26572	0.244849	0.230172	0.220839	0.219109
col_iaa	0.138559	0.150746	0.152662	0.144497	0.121912	0.155609	0.185533	0.191985	0.195505	0.196465	0.178264	0.210837	0.223439	0.238841	0.255128	0.263546	0.275136	0.283357	0.293771	0.280961	0.290247	0.303252	0.295986	0.287156	0.286991	0.284197	0.272936	0.260101	0.264037	0.247903	0.241456	0.242109	0.25355	0.260086	0.249024	0.242296	0.229721	0.231874	0.219947	0.202411	0.207377
col_iaa	0.137963	0.152838	0.159122	0.146765	0.166265	0.186032	0.190791	0.208567	0.185842	0.192187	0.203367	0.21458	0.242674	0.256698	0.27453	0.277904	0.278493	0.292458	0.285991	0.286458	0.269599	0.258355	0.264096	0.264519	0.266944	0.273162	0.292626	0.277468	0.277635	0.27734	0.280884	0.283723	0.297736	0.300935	0.290819	0.261002	0.256217	0.257218	0.258593	0.260017	0.262924
aux_iaa	0.0391099	0.0401222	0.0464219	0.0391508	0.0542704	0.0456148	0.0507383	0.0622411	0.0800157	0.0890086	0.100759	0.10261	0.105525	0.115055	0.121164	0.123282	0.125586	0.131542	0.134169	0.143444	0.145882	0.151112	0.150656	0.162414	0.163428	0.160837	0.168147	0.169829	0.16093	0.165965	0.159547	0.16324	0.161076	0.160027	0.150535	0.145402	0.144601	0.142292	0.149837	0.145544	0.144648
aux_iaa	0.0442481	0.0449756	0.0423254	0.0481039	0.0578679	0.0589704	0.0622495	0.0641713	0.0749384	0.0809811	0.0835712	0.0759743	0.0876084	0.0973256	0.103913	0.114636	0.107393	0.113712	0.107527	0.122225	0.126098	0.120585	0.125983	0.133652	0.129293	0.136615	0.141205	0.13463	0.137877	0.136735	0.134532	0.135585	0.126048	0.122999	0.114156	0.120735	0.128592	0.127327	0.130633	0.122353	0.12555
aux_iaa	0.0676149	0.0656655	0.0679836	0.0780917	0.0877034	0.0980297	0.10982	0.109288	0.111647	0.124642	0.134893	0.133888	0.142735	0.138749	0.148169	0.152763	0.145553	0.149353	0.150362	0.158155	0.147761	0.149599	0.152981	0.14347	0.141407	0.13296	0.131754	0.126618	0.114975	0.118633	0.114085	0.108411	0.108034	0.110504	0.0903597	NA	NA	NA	NA	NA	NA
aux_iaa	0.0891177	0.0965479	0.0964457	0.0977913	0.109479	0.106916	0.122046	0.129217	0.13519	0.143449	0.152346	0.153354	0.156137	0.16799	0.169011	0.17202	0.176916	0.18776	0.177858	0.179995	0.18566	0.186736	0.180762	0.175777	0.177166	0.185902	0.184489	0.172772	0.176602	0.177705	0.168046	0.167852	0.158334	0.159635	0.142117	0.144836	0.127727	0.125733	0.145408	0.149898	0.150991
aux_iaa	0.030367	0.0280055	0.0319632	0.0386225	0.0377776	0.0442967	0.0483288	0.0444717	0.0503914	0.0451032	0.0461231	0.0452222	0.0433384	0.0481611	0.0500552	0.0513656	0.0472012	0.0432212	0.045529	0.046687	0.0429624	0.0468643	0.0538484	0.0484851	0.0488255	0.0419268	0.0355141	0.0287049	0.0333779	0.0351372	0.0370438	0.0284894	0.0235548	0.0235806	0.0162522	0.00832359	0.00472114	0.00808263	0.00717462	0.00701996	0.0198459
aux_iaa	0.00241684	0.0167918	0.0302144	0.038897	0.0417002	0.0560072	0.0713293	0.0719387	0.0700192	0.0843145	0.0850189	0.0820275	0.0851414	0.0820312	0.0840252	0.0843694	0.0752464	0.0738009	0.0693991	0.0789451	0.0729925	0.0642718	0.0659869	0.0578467	0.0514229	0.0491104	0.0444874	0.0449597	0.0369792	0.0375042	0.0234161	0.0197844	0.0142375	0.00607054	-0.00177193	-0.00755585	-0.00399505	-0.00520536	-0.011881	-0.0150976	-0.0106061
aux_iaa	-0.00504186	0.00237073	0.00858078	0.0084763	0.0110542	0.00813466	0.018762	0.0140831	0.0189984	0.0263444	0.0240126	0.0173629	0.0159006	0.016036	0.0180497	0.0188657	0.0212118	0.0245263	0.023584	0.0320974	0.030951	0.0322188	0.0315775	0.0255543	0.0238543	0.0170757	0.0182078	0.0230499	0.0260318	0.0254871	0.0116457	0.0114934	0.00671267	0.00421962	-0.00655332	-0.00577855	-0.000518983	0.000818145	-0.000261343	-0.0101768	-0.00157252
aux_iaa	-0.0434465	-0.0430243	-0.0476932	-0.0544329	-0.0526873	-0.0608702	-0.0616254	-0.0706342	-0.0696829	-0.0716041	-0.0702109	-0.078671	-0.0865016	-0.0846542	-0.0830328	-0.0771944	-0.0797955	-0.0657771	-0.0698526	-0.0656156	-0.0639451	-0.0636586	-0.0628966	-0.0629229	-0.0595363	-0.0614727	-0.0637353	-0.0582272	-0.0552475	-0.0555149	-0.0521214	-0.0549007	-0.0528508	-0.0512186	-0.0544472	-0.0547933	-0.0482961	-0.0334427	-0.0406292	-0.0356986	-0.0262597
aux_iaa	-0.0584939	-0.0616	-0.056107	-0.0553468	-0.0584821	-0.0505735	-0.0435671	-0.0436527	-0.0360319	-0.034155	-0.0442169	-0.050158	-0.0537771	-0.053106	-0.0503735	-0.0466341	-0.0519653	-0.0433513	-0.0478749	-0.0443818	-0.0443359	-0.0427676	-0.0428116	-0.0479983	-0.0474871	-0.046701	-0.0438138	-0.0412918	-0.0318805	-0.0180144	-0.00617895	-0.00499161	-0.00242709	-0.00135741	0.011739	0.00650462	0.00642149	0.0281822	0.0332812	0.0328672	0.040068
aux_iaa	0.103036	0.115285	0.108857	0.10007	0.103686	0.107872	0.121905	0.131927	0.139926	0.136666	0.153596	0.160485	0.17039	0.188022	0.187625	0.181475	0.184341	0.179583	0.1739	0.179706	0.18566	0.184101	0.194959	0.187623	0.1692	0.165172	0.151988	0.135923	0.134149	0.12481	0.117377	0.142398	0.149798	0.145314	0.122135	0.128306	0.135061	0.153291	0.156219	0.147229	0.146097
aux_iaa	0.142031	0.138819	0.146286	0.155353	0.183111	0.183927	0.18313	0.191034	0.197061	0.192713	0.198407	0.204484	0.20564	0.214068	0.225693	0.225627	0.240877	0.242921	0.237994	0.229908	0.230793	0.23416	0.2553	0.252776	0.239158	0.236932	0.243626	0.233152	0.224393	0.213516	0.205255	0.191882	0.194487	0.18482	0.17721	0.187063	0.198899	0.182705	0.172018	0.163217	0.155837
aux_iaa	0.0810899	0.0793948	0.0726301	0.07177	0.0778254	0.0961461	0.100149	0.0909272	0.115515	0.131021	0.131555	0.126206	0.13318	0.140548	0.148735	0.16832	0.159538	0.158322	0.163882	0.161878	0.155578	0.157183	0.164836	0.168391	0.169419	0.171617	0.16694	0.156367	0.143235	0.13965	0.143023	0.148543	0.142023	0.143938	0.133182	0.126411	0.118287	0.125993	0.124556	0.13237	0.138491
aux_iaa	0.124175	0.13906	0.136803	0.124135	0.117496	0.120412	0.127994	0.117075	0.121458	0.122185	0.128224	0.120574	0.132288	0.138467	0.134949	0.136468	0.135612	0.135415	0.136748	0.141707	0.135658	0.151128	0.152278	0.154601	0.151642	0.160065	0.165377	0.171107	0.174435	0.170517	0.179119	0.171207	0.157517	0.159087	0.146957	0.137052	0.140819	0.136348	0.136543	0.138497	0.139721
pin_iaa	0.0397083	0.047646	0.0559089	0.0488294	0.0512532	0.0693881	0.0951275	0.10133	0.115473	0.127715	0.141988	0.164108	0.173744	0.17539	0.185741	0.187817	0.185387	0.188866	0.185122	0.183768	0.186153	0.172762	0.164459	0.17258	0.166231	0.150718	0.145388	0.142213	0.142466	0.143443	0.133462	0.136534	0.129635	0.134303	0.127086	0.112212	0.113867	0.106896	0.0973267	0.0921131	0.103
pin_iaa	0.0535467	0.0529578	0.0587862	0.0678726	0.0703242	0.0792103	0.0997305	0.11638	0.12863	0.13973	0.155899	0.17717	0.189009	0.209044	0.226707	0.234721	0.25076	0.258917	0.252015	0.249256	0.253851	0.249713	0.252864	0.254341	0.235677	0.241832	0.24353	0.241257	0.240634	0.23224	0.238156	0.22631	0.220514	0.217702	0.220262	0.227154	0.228812	0.220981	0.218486	0.212524	0.212374
pin_iaa	0.0510253	0.060034	0.0731842	0.068449	0.0822284	0.0889933	0.108034	0.128952	0.149933	0.168698	0.179985	0.197784	0.206198	0.220992	0.232599	0.246659	0.24413	0.249359	0.24981	0.241124	0.248154	0.24043	0.229522	0.230125	0.226388	0.209518	0.211118	0.209426	0.203354	0.195384	0.188564	0.183132	0.183749	0.177566	0.163126	0.155226	0.157552	0.144237	0.134966	0.131015	0.124646
pin_iaa	0.0406129	0.0464506	0.0396133	0.0378894	0.0696557	0.0858094	0.0957561	0.113757	0.130593	0.138611	0.158145	0.17282	0.177439	0.196588	0.204635	0.216325	0.216536	0.216167	0.21535	0.2108	0.221142	0.225612	0.208733	0.206273	0.209888	0.20353	0.19708	0.19494	0.190729	0.194567	0.190781	0.183943	0.179332	0.189472	0.185177	0.164935	0.169349	0.168583	0.1588	0.149761	0.144272
pin_iaa	0.067291	0.0773132	0.0793534	0.0777027	0.0824814	0.106915	0.126341	0.125071	0.131887	0.145565	0.162484	0.17217	0.184692	0.179535	0.2008	0.188238	0.193241	0.191333	0.187515	0.188581	0.183561	0.189114	0.187286	0.176966	0.168071	0.130581	0.0754138	0.143363	0.153826	0.143294	0.138477	0.140539	0.134278	0.130584	0.131373	0.126226	0.120557	0.111839	0.0994203	0.0952995	0.0968468
pin_iaa	0.0290362	0.0252244	0.0355704	0.0236367	0.0486549	0.0612157	0.0920861	0.104501	0.113231	0.132506	0.141627	0.154691	0.172692	0.183773	0.192091	0.203029	0.204333	0.199023	0.194036	0.188876	0.195458	0.191544	0.182346	0.178549	0.1735	0.158305	0.155578	0.145847	0.142054	0.132499	0.1232	0.120828	0.120454	0.118919	0.119394	0.103388	0.0942576	0.0887433	0.0831602	0.0808354	0.0838327
pin_iaa	0.0412492	0.0479215	0.0629341	0.0626935	0.0657725	0.0745112	0.0896674	0.0931346	0.105065	0.115704	0.131001	0.153126	0.161771	0.18442	0.190277	0.202565	0.199247	0.204284	0.187268	0.192477	0.186574	0.172224	0.164043	0.160263	0.150458	0.142066	0.140493	0.136208	0.139337	0.132761	0.129177	0.123972	0.121764	0.127799	0.121046	0.120073	0.116234	0.104337	0.103035	0.107356	0.112339
pin_iaa	0.0360711	0.0475128	0.0599335	0.0669464	0.0666248	0.0884278	0.120137	0.130443	0.144745	0.146196	0.149881	0.170477	0.17513	0.188543	0.20044	0.198773	0.184306	0.189233	0.177147	0.180442	0.176159	0.16173	0.15577	0.147886	0.143974	0.127146	0.116563	0.117207	0.114459	0.111987	0.115332	0.111752	0.114786	0.108278	0.108195	0.0982723	0.0958016	0.0872253	0.0859092	0.0794173	0.0724589
pin_iaa	0.0150915	0.0200208	0.0185447	0.0395776	0.0465852	0.0411167	0.0633299	0.0663006	0.0743388	0.0846865	0.0921591	0.0942027	0.0972276	0.10599	0.100921	0.112375	0.10856	0.111261	0.104277	0.112237	0.110411	0.110675	0.108225	0.0966729	0.0962922	0.105953	0.11055	0.113492	0.109345	0.102942	0.1059	0.104315	0.101565	0.110002	0.102412	0.108541	0.104864	0.105554	0.0955617	0.0941241	0.0974072
pin_iaa	0.153892	0.179874	0.170765	0.200746	0.222137	0.203031	0.210212	0.21443	0.23254	0.243976	0.249598	0.236854	0.238388	0.207782	0.216978	0.222295	0.240301	0.246181	0.237234	0.229231	0.232669	0.234553	0.232616	0.221513	0.218871	0.205006	0.203218	0.198906	0.189124	0.177083	0.179472	0.173429	0.177149	0.172437	0.162352	0.148518	0.137898	0.136425	0.134277	0.128306	0.119674
pin_iaa	0.243218	0.267743	0.264764	0.301428	0.311779	0.224834	0.225604	0.209501	0.335974	0.370789	0.391579	0.382443	0.394779	0.377298	0.349205	0.340879	0.336323	0.31735	0.307723	0.290725	0.279524	0.271125	0.263377	0.25737	0.233724	0.228863	0.202007	0.204948	0.182413	0.181901	0.192639	0.190833	0.190302	0.180956	0.180998	0.179707	0.166728	NA	NA	NA	NA
pin_iaa	0.208636	0.134311	0.122455	0.123649	0.109457	0.12059	0.115445	0.112912	0.110728	0.114151	0.11932	0.124578	0.131046	0.127121	0.13551	0.121533	0.127452	0.103009	0.157974	0.159688	0.152869	0.151016	0.160467	0.168703	0.152908	0.154954	0.163113	0.164672	0.167195	0.168564	0.168922	0.159345	0.160845	0.174519	0.15894	0.155006	0.163417	0.146838	0.137767	0.128838	NA
pin_iaa	0.14507	0.172434	0.201235	0.21202	0.222732	0.236994	0.254704	0.264842	0.282269	0.287246	0.287301	0.291566	0.273835	0.276067	0.283884	0.265318	0.272852	0.271691	0.281386	0.28834	0.294502	0.288871	0.283961	0.270023	0.269888	0.27158	0.26302	0.261901	0.252971	0.243433	0.253087	0.251169	0.258546	0.248191	0.230619	0.233436	0.248676	0.240146	NA	NA	NA

## Sheet: S3c
Line_condition	length (µm)	elongation (µm/min)
col_cm	63.367	2.11223
col_cm	70.967	2.36557
col_cm	99.178	3.30593
col_cm	62.777	2.09257
col_cm	79.816	2.66053
col_cm	57.052	1.90173
col_cm	71.254	2.37513
col_iaa	22.436	0.747867
col_iaa	25.638	0.8546
col_iaa	24.719	0.823967
col_iaa	19.321	0.644033
col_iaa	20.073	0.6691
col_iaa	15.75	0.525
col_iaa	17.907	0.5969
aux_cm	71.711	2.39037
aux_cm	63.467	2.11557
aux_cm	75.002	2.50007
aux_cm	103.312	3.44373
aux_iaa	23.496	0.7832
aux_iaa	26.789	0.892967
aux_iaa	43.453	1.44843
aux_iaa	41.919	1.3973
pin_cm	61.688	2.05627
pin_cm	76.705	2.55683
pin_cm	62.393	2.07977
pin_cm	75.742	2.52473
pin_iaa	16.016	0.533867
pin_iaa	11.758	0.391933
pin_iaa	19.492	0.649733
pin_iaa	11.563	0.385433
d_cm	104.135	3.47117
d_cm	76.543	2.55143
d_cm	97.906	3.26353
d_cm	68.677	2.28923
d_iaa	35.269	1.17563
d_iaa	39.17	1.30567
d_iaa	30.563	1.01877
d_iaa	44.547	1.4849
d_iaa	37.594	1.25313
d_iaa	50.654	1.68847
d_iaa	26.423	0.880767
d_iaa	71.501	2.38337
d_iaa	52.435	1.74783
d_iaa	71.093	2.36977
pin_iaa	30.11	1.00367
pin_iaa	25.961	0.865367
pin_iaa	40.12	1.33733
pin_iaa	40.093	1.33643
pin_iaa	35.239	1.17463
aux_iaa	19.461	0.6487
aux_iaa	48.562	1.61873
aux_iaa	77.259	2.5753
aux_iaa	68.087	2.26957
aux_iaa	65.123	2.17077
aux_iaa	85.406	2.84687
col_iaa	13.246	0.441533
col_iaa	8.176	0.272533
col_iaa	26.972	0.899067
col_iaa	26.32	0.877333
col_iaa	41.077	1.36923
col_iaa	35.695	1.18983
col_iaa	26.492	0.883067
d_cm	95.7	3.19
pin_cm	79.294	2.64313
pin_cm	77.665	2.58883
pin_cm	70.425	2.3475
aux_cm	114.243	3.8081
aux_cm	81.774	2.7258
aux_cm	106.994	3.56647
aux_cm	60.215	2.00717
col_cm	104.855	3.49517
col_cm	67.136	2.23787
col_cm	73.059	2.4353
col_cm	79.939	2.66463
col_iaa	33.77	1.12567
col_iaa	32.352	1.0784
col_iaa	37.886	1.26287
col_iaa	35.217	1.1739
col_iaa	25.585	0.852833
col_iaa	23.809	0.793633
col_iaa	23.746	0.791533
col_iaa	39.062	1.30207
d_iaa	58.564	1.95213
d_iaa	35.813	1.19377
d_iaa	36.961	1.23203
d_iaa	24.225	0.8075
d_iaa	50.207	1.67357
pin_iaa	13.291	0.443033
pin_iaa	11.55	0.385
pin_iaa	31.268	1.04227
pin_iaa	19.092	0.6364
pin_iaa	17.609	0.586967
pin_iaa	33.455	1.11517
aux_iaa	81.132	2.7044
aux_iaa	53.211	1.7737
aux_iaa	36.404	1.21347
aux_iaa	50.125	1.67083
aux_iaa	11.847	0.3949
aux_iaa	42.106	1.40353
aux_cm	95.04	3.168
aux_cm	65.002	2.16673
aux_cm	85.863	2.8621
aux_cm	82.647	2.7549
pin_cm	92.531	3.08437
pin_cm	85.8	2.86
pin_cm	60.292	2.00973
pin_cm	71.779	2.39263
pin_cm	55.241	1.84137
pin_cm	73.257	2.4419
d_cm	69.081	2.3027
d_cm	70.28	2.34267
d_cm	80.42	2.68067
d_cm	83.607	2.7869
d_cm	108.707	3.62357
d_cm	105.715	3.52383
col_cm	113.572	3.78573
col_cm	110.51	3.68367
col_cm	108.254	3.60847
col_cm	122.792	4.09307
col_cm	93.984	3.1328
col_cm	100.772	3.35907
col_cm	92.015	3.06717
col_cm	126.328	4.21093
col_cm	78.44	2.61467

## Sheet: S3d
d	0	20	40	60	80	100	120	140	160	180	200	220	240	260	280	300	320	340	360	380	400	420	440	460	480	500	520	540	560	580	600	620	640	660	680	700	720	740	760	780	800
col_iaa	0.0196044	0.0262506	0.0284285	0.0272603	0.0304648	0.0429891	0.0528104	0.0597017	0.0648529	0.067703	0.0660614	0.0692877	0.0744956	0.0732259	0.0752137	0.085451	0.0885086	0.137625	0.141687	0.153585	0.167832	0.188208	0.190045	0.197505	0.206124	0.208834	0.210982	0.212428	0.201394	0.19947	0.192633	0.190218	0.187931	0.183721	0.178238	0.175393	0.171531	0.167855	0.162189	0.155947	0.14218
col_iaa	0.0526839	0.055483	0.0563338	0.0594899	0.0658596	0.0728506	0.0791568	0.0794151	0.0829273	0.0900115	0.0911155	0.106191	0.118479	0.126868	0.139101	0.157341	0.165486	0.172949	0.173139	0.196054	0.185656	0.203932	0.20828	0.205627	0.197116	0.186795	0.178472	0.180344	0.175487	0.173808	0.171985	0.174587	0.175123	0.181058	0.180799	0.181172	0.183745	0.18377	0.183079	0.177576	0.177331
col_iaa	0.0266142	0.0314425	0.0359294	0.0426513	0.0454806	0.0437716	0.0373291	0.0415263	0.0489883	0.0532132	0.0611893	0.0953751	0.108621	0.124967	0.139679	0.145335	0.151734	0.152727	0.154795	0.143196	0.132151	0.121387	0.114624	0.119598	0.118592	0.124567	0.127213	0.134456	0.14177	0.147979	0.151792	0.1588	0.157976	0.155349	0.159109	0.151379	0.152548	0.154594	0.153957	0.153474	0.147577
col_iaa	0.0138987	0.018841	0.0205715	0.0200847	0.0207767	0.0297168	0.034742	0.0178145	0.0120167	0.0158039	0.034678	0.0423118	0.039746	0.0739377	0.0780294	0.0963212	0.109824	0.0781839	0.0691562	0.0682614	0.0784667	0.079446	0.0870404	0.0973331	0.112286	0.171557	0.181181	0.17847	0.172229	0.166942	0.159999	0.162563	0.152886	0.150536	0.150246	0.144087	0.144499	0.140003	0.133501	0.130366	0.119843
col_iaa	0.0331823	0.0320159	0.0275061	0.0222286	-0.00199243	0.0456434	0.0472342	0.054115	0.0669546	0.0687962	0.0859213	0.0872912	0.097571	0.11026	0.114399	0.118099	0.108148	0.102399	0.0923803	0.0807923	0.0679215	0.0568419	0.0533371	0.0515948	0.0552886	0.0595797	0.0642258	0.0656303	0.0687305	0.0697822	0.0694983	0.0755627	0.0754111	0.0766589	0.0778896	0.0796881	0.0862925	0.0887197	0.087783	0.0890788	0.0901055
col_iaa	0.104631	0.101193	0.0996726	0.0967128	0.0986196	0.0965011	0.095785	0.0933269	0.0905536	0.0913115	0.0857788	0.0975601	0.0945349	0.0891393	0.0825131	0.0772022	0.0651569	0.0576364	0.0490833	0.0358213	0.025113	0.0104769	0.00970865	0.0122907	0.0170385	0.0205391	0.034673	0.0426044	0.0428523	0.0313783	0.039007	0.0483814	0.0496841	0.0587325	0.0606727	0.0690497	0.0713214	0.0749837	0.0760625	0.0739927	0.0700106
col_iaa	0.0319654	0.0377162	0.036335	0.0319287	0.0397506	0.0440083	0.053725	0.0553707	0.0518678	0.0540131	0.0517468	0.0552264	0.0609836	0.062706	0.0608168	0.0696878	0.0683552	0.0807392	0.0765813	0.0697047	0.0602793	0.0526719	0.0404587	0.0412974	0.0286066	0.0196969	0.0152725	0.0103811	0.00996332	0.0116434	0.00728812	0.0171838	0.0157276	0.0251664	0.0241402	0.0349139	0.0368371	0.0433262	0.0451472	0.0465875	0.0515144
col_iaa	0.0605296	0.0601926	0.062802	0.0666504	0.0722827	0.0801465	0.0745446	0.0659686	0.0902228	0.0982315	0.0742096	0.071411	0.0719443	0.0679212	0.0651713	0.0578711	0.0523607	0.0403792	0.0385007	0.0255864	0.00966651	0.00401231	-0.00286231	-0.00276896	0.00178655	0.00185549	-0.000477479	0.00252296	0.00652906	0.0138589	0.0104502	0.0197737	0.0213235	0.0158716	0.0240713	0.0295968	0.0341045	0.0398057	0.0457989	0.0518909	0.0529008
col_iaa	0.102097	0.104908	0.104833	0.113214	0.11773	0.11759	0.118063	0.123248	0.123665	0.128177	0.130603	0.137973	0.13988	0.133748	0.136514	0.136754	0.129274	0.122983	0.110091	0.0906193	0.0750045	0.0613701	0.0486739	0.0406824	0.0393371	0.0392118	0.0338317	0.0284494	0.0293889	0.0302541	0.0269767	0.0255788	0.0252551	0.0321973	0.0340823	0.0417984	0.0453396	0.0518798	0.0542123	0.0586927	0.0580158
col_iaa	0.054692	0.0516217	0.0515125	0.0542754	0.0646894	0.067894	0.072066	0.0738242	0.0743301	0.0825284	0.0773873	0.0877877	0.0940918	0.104172	0.110008	0.0752914	0.0466332	0.031061	-0.00778675	-0.0194119	0.0213946	0.0544769	0.0594365	0.0791409	0.066201	0.0559186	0.0403203	0.0254685	0.0176032	0.0135062	0.0098379	0.00775262	0.00749439	0.0112529	0.0167277	0.0209231	0.0225348	0.030395	0.0342147	0.0420655	0.0398406
col_iaa	0.0495122	0.0576634	0.055793	0.0564239	0.0643062	0.0777184	0.0826493	0.0787736	0.082137	0.0715809	0.0648408	0.0605574	0.0478957	0.046483	0.0561321	0.0852637	0.100987	0.0837855	0.0376324	0.0324213	0.0420228	0.0295316	-0.0101428	0.057619	0.0674516	0.0648903	0.0698011	0.069642	0.0776485	0.0809485	0.0769196	0.0804573	0.0766195	0.071512	0.0718174	0.069413	0.0644084	0.0635353	0.0626565	0.0593978	0.0554487
col_iaa	0.0714038	0.0742976	0.0725364	0.0793069	0.0867072	0.0915168	0.0970188	0.107852	0.116415	0.122868	0.112432	0.101528	0.0989775	0.09662	0.0705088	0.0548669	0.0505116	0.0396076	0.0487819	0.0523377	0.0624887	0.0735551	0.0809219	0.0884711	0.0945188	0.0972613	0.0953398	0.0890897	0.0909557	0.0883357	0.0826349	0.0831947	0.0800014	0.0729783	0.0685145	0.0689333	0.0667788	0.0610671	0.054873	0.0532772	0.0480165
col_iaa	0.0405177	0.0395445	0.0381077	0.0412423	0.0441216	0.0505872	0.0522825	0.0502206	0.0508186	0.05433	0.0545304	0.0471189	0.045173	0.0448584	0.0472696	0.0499415	0.0507249	0.0699774	0.0797471	0.0898856	0.094366	0.0993545	0.105588	0.111118	0.11114	0.106302	0.111583	0.112034	0.108913	0.104859	0.0955508	0.0961479	0.0939256	0.0915893	0.0904048	0.0860218	0.0886619	0.07968	0.0758466	0.0700279	0.0613748
col_iaa	-0.00359906	-0.00240154	-0.00310657	-0.00522985	-0.00198694	-0.00198534	-0.00932112	-0.0118632	-0.0117614	0.00145178	0.010622	0.0120164	0.00804021	0.0136168	0.0116385	0.00501484	0.00931099	0.013177	0.0179188	0.0149255	0.00636816	0.00402266	-0.0131822	-0.0162001	-0.0163543	-0.0185084	-0.0164152	-0.0203065	-0.0217441	-0.0309286	-0.034979	-0.0328102	-0.0340768	-0.0318066	-0.0280822	-0.0266652	-0.0210185	-0.0151051	-0.00529609	-0.004374	-0.0056387
col_iaa	0.00328469	0.0114085	0.0154535	0.0196558	0.0150163	0.0188533	0.00957078	0.00179831	0.00123815	0.0124237	0.0123896	0.0287217	0.0300467	0.0293405	0.0303195	0.0249403	0.0245196	0.0252319	0.0267144	0.0200549	0.00857295	-0.0050245	-0.0136195	-0.0203396	-0.0209369	-0.0255995	-0.028055	-0.0293337	-0.0302369	-0.0351603	-0.0362317	-0.0329129	-0.0319735	-0.0303681	-0.0287595	-0.0297146	-0.0265501	-0.0139844	-0.0123187	-0.00603456	-0.00254322
col_iaa	-0.0218034	-0.0168881	-0.0243895	-0.0245172	-0.0244003	-0.0237809	-0.0210508	-0.0207592	-0.0119729	-0.00108928	0.00577815	0.016047	0.0277017	0.0341066	0.0428363	0.0502456	0.052767	0.0517151	0.0475069	0.0387671	0.0272104	0.0134313	0.0110412	0.00869804	0.011966	0.0134357	0.0163818	0.0226598	0.0257044	0.0284433	0.0333846	0.0387555	0.0434798	0.047418	0.0526931	0.0513562	0.0627683	0.060271	0.0675624	0.0745067	0.0734059
col_iaa	0.0221785	0.025765	0.0283556	0.0279492	0.0219697	0.0332679	0.0311182	0.0397243	0.0500924	0.0723731	0.0958743	0.101167	0.0928785	0.0817814	0.0735354	0.0539954	0.0197782	0.00381649	-0.0131891	-0.0330135	-0.0510253	-0.0464544	-0.0560314	-0.055377	-0.0508918	-0.0454347	-0.0342331	-0.0228453	-0.00530369	0.0083116	0.0157801	0.0312087	0.0393218	0.047984	0.0557852	0.0591654	0.068338	0.0765892	0.0806132	0.0731587	0.0796165
col_iaa	0.0130198	0.0155206	0.019356	0.0209661	0.0239985	0.0291695	0.0374307	0.0346001	0.0395927	0.0466039	0.038181	0.0365891	0.0468598	0.051489	0.0380763	0.0469227	0.0524425	0.0653709	0.0865432	0.10704	0.122416	0.137406	0.142491	0.147081	0.150097	0.145613	0.146473	0.147039	0.147005	0.147191	0.147591	0.147084	0.147087	0.146747	0.14481	0.140009	0.141798	0.143493	0.143416	0.139351	0.138656
col_iaa	0.00980988	0.0111487	0.00442799	0.0109226	0.00758718	0.0155841	0.0160031	0.0160724	0.0191969	0.027799	0.0296559	0.0332342	0.042444	0.0470361	0.0577866	0.064849	0.0394893	0.0539396	0.0750559	0.0879575	0.108987	0.119369	0.119166	0.126568	0.127199	0.131839	0.12957	0.124727	0.129569	0.132368	0.129987	0.137591	0.143628	0.140993	0.140961	0.141462	0.13424	0.137094	0.138613	0.141959	0.138717
aux_iaa	-0.0161592	-0.102455	-0.101733	-0.102878	-0.0994586	-0.0978567	-0.0980849	-0.103058	-0.102501	-0.101789	-0.102388	-0.093381	-0.0954239	-0.0999905	-0.098551	-0.0994568	-0.0976116	-0.0991473	-0.097625	-0.0961853	-0.0960207	-0.0988157	-0.0949076	-0.0984083	-0.0957114	-0.0946284	-0.0957831	-0.0932933	-0.0953816	-0.0968222	-0.102222	-0.105086	-0.0976598	-0.10376	-0.102048	-0.103714	-0.117093	-0.114063	-0.110811	-0.118344	-0.119327
aux_iaa	-0.0867913	-0.0812474	-0.0797863	-0.079044	-0.0679154	-0.0648189	-0.0637323	-0.0634424	-0.0617989	-0.0669821	-0.0675133	-0.0643162	-0.0650536	-0.0731441	-0.072282	-0.0848794	-0.0878361	-0.0887419	-0.0932834	-0.0956306	-0.0961624	-0.0987529	-0.102142	-0.101967	-0.104978	-0.105682	-0.106475	-0.105565	-0.102796	-0.098985	-0.0930534	-0.0974539	-0.0924118	-0.0939475	-0.0918562	-0.0970351	-0.108187	-0.0965238	-0.0923457	-0.104671	-0.106496
aux_iaa	-0.0406448	-0.041751	-0.0370506	-0.0370577	-0.03476	-0.0306646	-0.0287285	-0.0289867	-0.0295709	-0.0280925	-0.0301747	-0.029216	-0.0293831	-0.034371	-0.0263757	-0.0371574	-0.0382247	-0.0381814	-0.0376898	-0.0332902	-0.0358667	-0.0354326	-0.0324696	-0.03468	-0.0325536	-0.0290534	-0.0279332	-0.0223184	-0.0188737	-0.0122804	-0.00803914	-0.0108376	-0.00235018	0.00010227	0.00616887	0.00478774	-0.00675673	-0.00193021	0.00339082	-0.00560282	-0.00125626
aux_iaa	-0.0462171	-0.0438189	-0.0381116	-0.0319466	-0.0330252	-0.0225812	-0.0161678	-0.0258071	-0.0296568	-0.0317542	-0.0358404	-0.033175	-0.0413548	-0.0416043	-0.0442009	-0.0530328	-0.0543009	-0.0516689	-0.0565357	-0.0576714	-0.0590199	-0.0618427	-0.0574872	-0.0613238	-0.0624313	-0.0609692	-0.0653811	-0.0598776	-0.0596041	-0.0567839	-0.0550224	-0.0543115	-0.0488166	-0.0502587	-0.0502386	-0.0553069	-0.0672834	-0.0587651	-0.0599282	-0.0691469	-0.0719011
aux_iaa	-0.0437131	-0.0407306	-0.037204	-0.0224275	-0.0150393	-0.0119237	-0.00276051	-0.00560211	-0.00652365	-0.00549534	-0.0111269	-0.0105977	-0.0121203	-0.0116056	-0.00439932	-0.00811739	-0.00752502	-0.00506357	-0.00616078	-0.0117138	-0.0138469	-0.0101981	-0.00744044	-0.0140118	-0.0155171	-0.0165903	-0.0158204	-0.0173568	-0.0195951	-0.0118472	-0.0163087	-0.0278135	-0.0244307	-0.0259416	-0.0258837	-0.0365892	-0.0443114	-0.0458511	-0.0400912	-0.0462621	-0.0479498
aux_iaa	-0.0564267	-0.050895	-0.0475323	-0.0388099	-0.0365598	-0.0294465	-0.0202965	-0.0238685	-0.0244057	-0.022197	-0.0252077	-0.0197555	-0.0194056	-0.0185721	-0.0191752	-0.0213815	-0.0225381	-0.0229656	-0.0214321	-0.0249188	-0.0276298	-0.025146	-0.0227067	-0.02682	-0.0249277	-0.0238002	-0.0234408	-0.0252002	-0.0217854	-0.0221396	-0.0261602	-0.0259397	-0.021989	-0.0279418	-0.0301491	-0.0389976	-0.0537808	-0.0526221	-0.0525736	-0.0624856	-0.0647704
aux_iaa	0.011064	0.0179086	0.0243535	0.0241528	0.0319154	0.0396613	0.0459221	0.0520291	0.0563211	0.0659038	0.0722248	0.077488	0.085488	0.0827324	0.0889299	0.08763	0.0855675	0.0871321	0.0876338	0.0866897	0.0890717	0.0846758	0.0885885	0.0852327	0.0825215	0.0822277	0.078538	0.0756561	0.0724221	0.0680902	0.0648936	0.060916	0.0574894	0.0527071	0.046844	0.0384601	0.0257336	0.0200212	0.0167714	0.00688636	0.00104596
aux_iaa	-0.0180347	-0.0230347	-0.0217632	-0.0195424	-0.0212785	-0.0136557	-0.00763912	-0.00845233	0.00019004	0.00691036	0.0101847	0.012556	0.0162613	0.017241	0.0258411	0.0211501	0.0275004	0.0299471	0.0284503	0.0261977	0.022584	0.024468	0.0281127	0.022781	0.0260444	0.0280094	0.0255776	0.0271415	0.0313857	0.0353797	0.0289121	0.0307274	0.0350729	0.0318801	0.0352538	0.0292115	0.014328	0.01334	0.0146332	0.00659033	0.00346794
aux_iaa	0.0760495	0.088026	0.0922728	0.101227	0.104327	0.114485	0.120425	0.120335	0.120035	0.122789	0.12061	0.121683	0.119327	0.113835	0.116644	0.112447	0.110426	0.110989	0.109	0.107286	0.101935	0.102519	0.101042	0.0970382	0.0959058	0.0926373	0.088206	0.0869511	0.0887663	0.0879133	0.0821728	0.0806564	0.0766198	0.0699715	0.0670337	0.0584761	0.0434509	0.0473113	0.0477839	0.0408991	0.0332757
pin_iaa	0.0572207	0.0593643	0.0659892	0.0797636	0.0852692	0.0948418	0.098421	0.108413	0.123677	0.132936	0.139776	0.146713	0.157241	0.162293	0.165152	0.169365	0.157738	0.162518	0.162318	0.157071	0.156143	0.155534	0.161624	0.1584	0.155817	0.155472	0.155143	0.149437	0.150718	0.14456	0.140028	0.132719	0.130789	0.128317	0.122704	0.124925	0.120184	0.122398	0.115739	0.109801	0.108554
pin_iaa	0.0390164	0.0394409	0.0408751	0.0484274	0.0597609	0.0660172	0.072492	0.0857571	0.0969427	0.10542	0.107862	0.103082	0.102217	0.0956489	0.0897407	0.0896535	0.0890407	0.0872906	0.0838671	0.0803029	0.0805048	0.0801664	0.0798897	0.0829231	0.078217	0.0776828	0.0771682	0.0800301	0.078794	0.0807871	0.0829718	0.0827848	0.0846572	0.0666428	0.0852567	0.0937924	0.0921981	0.0876851	0.0705539	0.0770002	0.0936141
pin_iaa	0.0603087	0.0723415	0.0708079	0.0807795	0.085178	0.0934508	0.101924	0.107354	0.117077	0.119991	0.131603	0.134285	0.137927	0.146665	0.14897	0.148195	0.14133	0.138068	0.138447	0.134734	0.135165	0.134953	0.133633	0.132326	0.111882	0.0732321	0.0843631	0.111931	0.105491	0.107919	0.101145	0.0961473	0.0925456	0.0853694	0.0817618	0.0839741	0.0820752	0.0872903	0.0909171	0.085821	0.0795874
pin_iaa	-0.00541734	-0.00351104	0.000449374	0.00503632	0.00742977	0.00834837	0.014265	0.0125198	0.0110528	0.00980389	0.00680988	0.00158296	0.00125124	5.29e-05	-0.00764355	-0.00440616	-0.0083368	-0.010618	-0.013813	-0.0144153	-0.0111276	-0.0179718	-0.0140675	-0.0121997	-0.009064	-0.00417359	0.00533093	0.0154703	0.0186642	0.0283568	0.0295127	0.0337704	0.0310609	0.033028	0.0169544	0.042444	0.0407397	0.0344238	0.0435148	0.0421708	0.0355682
pin_iaa	-0.00288416	-0.0152215	-0.0330999	-0.0504897	-0.0566466	-0.057297	-0.0673495	-0.0791749	-0.112874	-0.127808	-0.131563	-0.13183	-0.131914	-0.127394	-0.133275	-0.122683	-0.117231	-0.111802	-0.107896	-0.111468	-0.107595	-0.100467	-0.0945652	-0.0955689	NA	NA	NA	NA	NA	NA	NA	NA	NA	NA	NA	NA	NA	NA	NA	NA	NA
pin_iaa	-0.0504799	-0.051967	-0.0529783	-0.0522322	-0.0459888	-0.043968	-0.0521533	-0.0559586	-0.0532221	-0.0570184	-0.0547935	-0.0484698	-0.0361028	-0.0332325	-0.0263234	-0.0233203	-0.0155005	-0.0114212	-0.00814023	-0.00979809	-0.0103181	-0.0108651	-0.0105931	-0.00619143	-0.0106624	-0.0123614	-0.00915217	-0.00383595	-0.0123906	-0.0130136	-0.0194612	-0.0208437	-0.0265401	-0.0352341	-0.0388792	-0.0387899	-0.046536	-0.0538321	-0.0588848	-0.0577008	-0.0622881
pin_iaa	-0.04076	-0.0529329	-0.0565487	-0.0654421	-0.0675953	-0.0687617	-0.0662518	-0.0598177	-0.056251	-0.0504101	-0.0412346	-0.0362342	-0.0355447	-0.0347887	-0.0262221	-0.0255917	-0.0143776	0.0015511	0.0144776	0.00480169	NA	NA	NA	NA	NA	NA	NA	NA	NA	NA	NA	NA	NA	NA	NA	NA	NA	NA	NA	NA	NA
pin_iaa	0.0137181	0.012398	0.0186662	0.025281	0.0326626	0.0413138	0.0383729	0.0463347	0.0580705	0.0655492	0.0747923	0.0861874	0.0968966	0.101031	0.111384	0.113573	0.105804	0.101541	0.103717	0.0997187	0.103144	0.100132	0.0938825	0.0941592	0.0948693	0.0885511	0.0886311	0.0909173	0.0902958	0.0910875	0.0892063	0.0868432	0.0847049	0.0804377	0.0772132	0.0734865	0.0706332	0.0733844	0.0701804	0.0729253	0.0614098
pin_iaa	0.0597786	0.0634787	0.0718506	0.0831004	0.0987711	0.111962	0.123018	0.130201	0.132976	0.138202	0.147505	0.152493	0.160921	0.168649	0.179686	0.179911	0.180972	0.187907	0.188305	0.185079	0.181416	0.184474	0.185621	0.182806	0.177709	0.174973	0.182286	0.181343	0.17208	0.169596	0.172605	0.170735	0.170864	0.165198	0.158995	0.157826	0.155359	0.154049	0.147468	0.142566	0.136625
pin_iaa	0.0415408	0.0474763	0.0547399	0.0600981	0.0674649	0.0774587	0.0805308	0.0839052	0.0841961	0.0926415	0.0950527	0.0983309	0.100126	0.103607	0.104683	0.101865	0.0994265	0.0978227	0.0991117	0.0931238	0.0880485	0.0863566	0.0876377	0.0811682	0.0771982	0.0717176	0.0703399	0.0676279	0.0697069	0.0644152	0.0589606	0.0574183	0.0479205	0.0388815	0.0359138	0.037014	0.0330778	0.0277141	0.0197739	0.00932897	0.0118709
pin_iaa	0.0532749	0.0493707	0.0533998	0.0608375	0.0730758	0.0917525	0.0969548	0.107492	0.113885	0.120299	0.124604	0.131226	0.140476	0.145597	0.145656	0.146917	0.151008	0.150826	0.148187	0.141319	0.135702	0.136657	0.138513	0.135336	0.131712	0.131261	0.126328	0.124115	0.124818	0.124424	0.121482	0.121679	0.114623	0.111953	0.107784	0.108507	0.100509	0.0996547	0.101968	0.0977998	0.0976287

## Sheet: S3e
gen/cond	length (µm)	elongation (µm/min)
col_iaa	49.101	1.6367
col_iaa	40.244	1.34147
col_iaa	58.427	1.94757
col_iaa	58.31	1.94367
col_iaa	67.773	2.2591
pin_iaa	39.832	1.32773
pin_iaa	32.839	1.09463
pin_iaa	39.683	1.32277
auxpin_cm	46.422	1.5474
auxpin_cm	53.641	1.78803
auxpin_cm	61.828	2.06093
auxpin_iaa	65.563	2.18543
auxpin_iaa	63.963	2.1321
auxpin_iaa	92.847	3.0949
auxpin_iaa	67.902	2.2634
auxpin_iaa	91.317	3.0439
pin_cm	41.887	1.39623
pin_cm	62.507	2.08357
col_cm	86.938	2.89793
col_cm	93.733	3.12443
col_cm	66.002	2.20007
col_cm	78.334	2.61113
col_cm	82.398	2.7466
auxpin_iaa	60.179	2.00597
auxpin_iaa	52.322	1.74407
pin_iaa	36.566	1.21887
pin_iaa	73.536	2.4512
pin_iaa	49.255	1.64183
pin_iaa	28.6	0.953333
aux_iaa	57.311	1.91037
aux_iaa	66.695	2.22317
aux_iaa	77.417	2.58057
aux_iaa	19.746	0.6582
aux_iaa	66.584	2.21947
aux_iaa	57.865	1.92883
col_iaa	61.622	2.05407
col_iaa	61.05	2.035
col_iaa	68.593	2.28643
col_iaa	78.725	2.62417
col_iaa	74.491	2.48303
col_iaa	66.147	2.2049
col_iaa	64.447	2.14823
col_iaa	60.762	2.0254
col_iaa	59.766	1.9922
col_iaa	49.515	1.6505
auxpin_cm	60.202	2.00673
auxpin_cm	37.569	1.2523
auxpin_cm	66.584	2.21947
auxpin_cm	61.09	2.03633
auxpin_cm	74.093	2.46977
pin_cm	59.542	1.98473
pin_cm	43.408	1.44693
pin_cm	47.913	1.5971
pin_cm	53.675	1.78917
aux_cm	71.905	2.39683
aux_cm	28.874	0.962467
aux_cm	45.57	1.519
aux_cm	67.916	2.26387
aux_cm	72.341	2.41137
aux_cm	79.568	2.65227
col_cm	87.587	2.91957
col_cm	84.916	2.83053
col_cm	59.707	1.99023
col_cm	59.99	1.99967
col_cm	74.808	2.4936
col_cm	77.782	2.59273
col_cm	98.786	3.29287
col_cm	87.645	2.9215
col_cm	68.699	2.28997
col_cm	98.23	3.27433
col_iaa	75.406	2.51353
col_iaa	83.23	2.77433
col_iaa	55.231	1.84103
col_iaa	60.988	2.03293
aux_iaa	71.637	2.3879
aux_iaa	49.5	1.65
aux_iaa	59.364	1.9788
pin_iaa	51.796	1.72653
pin_iaa	29.041	0.968033
pin_iaa	42.914	1.43047
pin_iaa	39.085	1.30283
auxpin_iaa	37.537	1.25123
auxpin_iaa	66.039	2.2013
auxpin_iaa	50.564	1.68547
auxpin_iaa	55.132	1.83773
auxpin_cm	83.826	2.7942
auxpin_cm	78.317	2.61057
auxpin_cm	97.905	3.2635
auxpin_cm	81.401	2.71337
pin_cm	82.647	2.7549
pin_cm	78.748	2.62493
pin_cm	108.59	3.61967
aux_cm	32.371	1.07903
aux_cm	80.691	2.6897
col_cm	64.958	2.16527
col_cm	83.549	2.78497
col_cm	78.419	2.61397
col_cm	116.055	3.8685

## Sheet: S3f
d	0	20	40	60	80	100	120	140	160	180	200	220	240	260	280	300	320	340	360	380	400	420	440	460	480	500	520	540	560	580	600	620	640	660	680	700	720	740	760	780	800
col_cm	1.00045	1.00958	1.01091	1.01631	1.00537	0.996014	0.999224	1.01871	1.03683	1.04964	1.06128	1.06076	1.06998	1.07434	1.07613	1.08123	1.08488	1.08794	1.08769	1.08587	1.08065	1.06179	1.04096	1.0231	1.00487	0.991261	0.982087	0.968014	0.949416	0.934179	0.923833	0.912668	0.899894	0.888285	0.884161	0.880063	0.869693	0.86387	0.858079	0.855496	0.853802
col_cm	0.972848	0.980874	0.985062	0.994232	0.991311	0.987313	1.00576	1.01326	1.01527	1.01933	1.0311	1.04099	1.05023	1.05471	1.06838	1.07438	1.07988	1.08139	1.07109	1.06833	1.04307	1.01887	0.988924	0.969453	0.946193	0.925123	0.90887	0.894364	0.879417	0.866017	0.858308	0.848979	0.836409	0.820909	0.815481	0.816259	0.811956	0.808523	0.806532	0.809777	0.808785
col_cm	0.978627	0.985329	0.988652	1.00061	1.00426	1.01045	1.01565	1.0128	1.02287	1.01896	1.01587	1.01163	1.01491	1.0296	1.04025	1.03657	1.04676	1.05006	1.06001	1.06192	1.06363	1.06041	1.05074	1.04802	1.0337	1.02338	1.00619	0.986997	0.971877	0.957205	0.93717	0.925424	0.908696	0.896944	0.88557	0.877829	0.872198	0.86257	0.859131	0.853323	0.844683
col_cm	0.996572	1.00306	1.00951	1.01512	1.0169	1.02773	1.04198	1.05026	1.06278	1.06084	1.05754	1.07067	1.07725	1.08732	1.09128	1.10001	1.1149	1.12908	1.13566	1.13884	1.13265	1.11876	1.10449	1.08177	1.06694	1.04441	1.0263	1.00443	0.987858	0.975512	0.950869	0.937496	0.925616	0.910669	0.906899	0.894098	0.888517	0.879139	0.870407	0.869119	0.866452
col_cm	1.02016	1.02336	1.04332	1.05176	1.05456	1.05566	1.05394	1.06817	1.08493	1.09452	1.10508	1.1037	1.11446	1.12334	1.13232	1.13338	1.14758	1.14713	1.14066	1.14281	1.1304	1.11477	1.10147	1.08943	1.07421	1.05603	1.04286	1.02722	1.01389	0.999574	0.978014	0.969237	0.956429	0.94815	0.940393	0.928266	0.916339	0.911266	0.904422	0.894803	0.892779
col_cm	1.01012	1.0207	1.02836	1.04227	1.0477	1.05966	1.07879	1.08769	1.10694	1.11911	1.12782	1.13595	1.14006	1.14368	1.15187	1.16952	1.17831	1.18821	1.1953	1.19691	1.19325	1.17465	1.15345	1.13103	1.11702	1.09656	1.06924	1.06231	1.05937	1.04535	1.02615	1.00962	0.994718	0.987928	0.972281	0.963591	0.955389	0.943722	0.936889	0.926073	0.921618
col_cm	0.99801	1.00565	1.0146	1.02447	1.03332	1.04089	1.05333	1.06369	1.07353	1.08196	1.08269	1.08351	1.08768	1.09447	1.09944	1.10728	1.11629	1.12323	1.1238	1.11742	1.09952	1.08617	1.07473	1.05387	1.02701	1.01864	0.999335	0.990369	0.975759	0.966376	0.953526	0.943596	0.933938	0.928385	0.918091	0.908013	0.902891	0.894916	0.891262	0.886474	0.886616
col_cm	0.997169	1.00164	0.980919	0.992599	0.993533	1.01098	1.03605	1.05271	1.06071	1.063	1.07235	1.08384	1.09563	1.1034	1.1102	1.11008	1.10383	1.10496	1.098	1.07086	1.04472	1.01379	0.988295	0.960845	0.946347	0.925681	0.913992	0.900676	0.891019	0.881359	0.870414	0.859298	0.850744	0.845869	0.841321	0.842945	0.840276	0.839474	0.843321	0.840653	0.839469
col_cm	1.00423	1.01175	1.02031	1.02937	1.03348	1.04505	1.05275	1.06005	1.06113	1.05933	1.06737	1.07616	1.08469	1.08908	1.09405	1.09847	1.10197	1.11263	1.1131	1.117	1.10799	1.10088	1.08834	1.08005	1.06371	1.04763	1.02345	1.00771	0.989371	0.974486	0.959648	0.946166	0.933926	0.924859	0.914295	0.908306	0.899871	0.895353	0.893467	0.891575	0.892113
col_cm	1.02181	1.03371	1.04404	1.04949	1.05683	1.07193	1.07862	1.08582	1.08413	1.08273	1.10428	1.11091	1.11661	1.12128	1.13311	1.13818	1.15228	1.15888	1.16995	1.17088	1.17024	1.15575	1.15043	1.13834	1.12555	1.10664	1.09493	1.08026	1.06611	1.04966	1.02721	1.01714	1.0032	0.985295	0.979616	0.969115	0.95721	0.951422	0.938359	0.928594	0.921297
aux_cm	0.921383	0.921826	0.923471	0.920477	0.91672	0.920036	0.915974	0.90928	0.906704	0.898602	0.894314	0.885615	0.881909	0.869165	0.867917	0.859376	0.860938	0.857186	0.85549	0.858341	0.850318	0.850108	0.852037	0.85217	0.851181	0.85196	0.853148	0.853269	0.853304	0.854226	0.851325	0.852187	0.848229	0.855914	0.852423	0.850192	0.8543	0.848809	0.846012	0.844898	0.846176
aux_cm	0.940354	0.943868	0.945835	0.945409	0.947157	0.945557	0.942445	0.941743	0.937584	0.934291	0.925617	0.92249	0.918962	0.913341	0.904134	0.899749	0.889666	0.88249	0.879384	0.873362	0.869146	0.865435	0.862388	0.855477	0.861281	0.860046	0.858077	0.863152	0.860753	0.859575	0.862409	0.860647	0.860986	0.866823	0.866147	0.866532	0.869869	0.872983	0.879004	0.88062	0.882208
aux_cm	0.933702	0.929375	0.93048	0.928667	0.925587	0.921949	0.926585	0.916239	0.912732	0.912881	0.908408	0.902318	0.892164	0.890745	0.886872	0.880565	0.878606	0.874592	0.870305	0.865923	0.859135	0.857963	0.859351	0.861163	0.850007	0.848128	0.847325	0.841824	0.839465	0.837819	0.836142	0.839508	0.836326	0.835854	0.835877	0.835518	0.83675	0.831808	0.834305	0.829311	0.830584
aux_cm	0.962859	0.962492	0.96489	0.967901	0.967606	0.966604	0.970485	0.971204	0.97153	0.966964	0.961059	0.959642	0.953545	0.948308	0.94412	0.933079	0.926131	0.922631	0.922637	0.914309	0.904486	0.898815	0.893984	0.886234	0.884409	0.880131	0.873003	0.867532	0.8622	0.859186	0.858208	0.858947	0.853339	0.855207	0.858865	0.856408
aux_cm	0.945082	0.942872	0.948483	0.94196	0.934198	0.939907	0.941837	0.940304	0.935706	0.924795	0.91146	0.906661	0.898823	0.892687	0.888797	0.881667	0.882097	0.877069	0.879273	0.874658	0.87136
col_fc	0.903309	0.901682	0.897883	0.892857	0.892945	0.891706	0.895582	0.900979	0.905426	0.909829	0.912019	0.921411	0.941273	0.953611	0.970912	0.978469	0.987845	0.992826	0.999278	1.00236	0.98852	0.978733	0.966942	0.948453	0.933101	0.920923	0.905757	0.8979	0.879784	0.862954	0.8489	0.834771	0.826116	0.81815	0.812771	0.802026	0.795421	0.791817	0.785212	0.783457	0.78424
col_fc	0.915422	0.906883	0.911731	0.91777	0.921068	0.926043	0.930569	0.934071	0.939723	0.952788	0.966844	0.983067	1.01604	1.03797	1.06248	1.08261	1.10371	1.12297	1.13158	1.12241	1.10833	1.08556	1.06864	1.05182	1.03827	1.02077	0.999028	0.97592	0.948168	0.928492	0.909765	0.889486	0.871205	0.85406	0.836949	0.829226	0.815425	0.807623	0.800403	0.79374	0.785461
col_fc	0.889095	0.890116	0.886744	0.884057	0.886668	0.892932	0.903355	0.916719	0.929043	0.94062	0.940349	0.959451	0.962615	0.972804	0.987899	0.99819	1.0127	1.02349	1.04899	1.06386	1.08446	1.10391	1.11687	1.11416	1.11111	1.10146	1.08172	1.06899	1.05877	1.04151	1.02214	0.998325	0.980919	0.964885	0.948479	0.941143	0.929829	0.911959	0.899526	0.882556	0.870945
col_fc	0.875252	0.862701	0.85846	0.857212	0.864099	0.865222	0.869197	0.872845	0.87477	0.890503	0.900977	0.918606	0.93708	0.953402	0.971477	0.993468	1.01377	1.0219	1.03212	1.04367	1.04429	1.04655	1.04749	1.03787	1.02461	1.00974	0.987698	0.970986	0.95294	0.941014	0.924645	0.913843	0.897943	0.887339	0.874635	0.858303	0.855295	0.848705	0.837791	0.825272	0.814366
col_fc	0.916375	0.908339	0.903185	0.901796	0.911063	0.914424	0.926481	0.935946	0.947256	0.955076	0.958344	0.96651	0.985243	1.01761	1.0392	1.0551	1.07846	1.08442	1.089	1.08525	1.08243	1.07195	1.05247	1.03746	1.01469	0.995516	0.973718	0.962683	0.946669	0.933557	0.92583	0.910819	0.899885	0.888484	0.87506	0.862772	0.855816	0.844913	0.83475	0.825563	0.81772
col_fc	0.950628	0.948448	0.947843	0.950791	0.95208	0.960104	0.96667	0.97435	0.976559	0.982741	0.990861	0.99238	1.00173	1.01279	1.02803	1.03802	1.0511	1.06055	1.0711	1.06917	1.06428	1.05532	1.03711	1.01518	0.976978	0.954954	0.937722	0.918411	0.905211	0.887181	0.873576	0.869232	0.867	0.867773	0.859743	0.857898	0.852886	0.846774	0.844278	0.848881	0.855576
col_fc	0.949602	0.949254	0.949113	0.950094	0.955585	0.95433	0.959084	0.963034	0.974661	0.986833	1.00209	1.0172	1.02684	1.03935	1.0575	1.06466	1.08448	1.09644	1.11134	1.12342	1.1208	1.10888	1.08277	1.07072	1.04566	1.02988	1.00567	0.979871	0.953593	0.933321	0.913977	0.897276	0.884825	0.870528	0.85629	0.846081	0.835569	0.830663	0.821776	0.820387	0.819118
col_fc	0.940449	0.939428	0.936542	0.938782	0.951357	0.965366	0.982989	1.00653	1.03494	1.05081	1.0614	1.06751	1.087	1.08565	1.09339	1.09957	1.10927	1.12438	1.13273	1.15183	1.16184	1.17593	1.17409	1.17386	1.16506	1.14392	1.12981	1.11092	1.08233	1.0532	1.02797	1.00094	0.985743	0.964417	0.94837	0.933022	0.91658	0.904242	0.891359	0.875702	0.858421
col_fc	0.946838	0.952254	0.951228	0.953955	0.966017	0.972844	0.987205	0.998078	1.00863	1.02493	1.03818	1.06096	1.08204	1.10711	1.13469	1.14639	1.14425	1.14787	1.14395	1.11761	1.08611	1.05684	1.027	0.995214	0.969409	0.944182	0.92341	0.898593	0.874716	0.861717	0.848299	0.834513	0.823508	0.815661	0.804445	0.8008	0.791758	0.786083	0.787505	0.79021	0.792004
col_fc	0.937491	0.929797	0.930263	0.923026	0.927307	0.935353	0.941188	0.956411	0.972541	0.978017	0.995258	1.00743	1.02634	1.04491	1.05997	1.08807	1.10692	1.11135	1.11319	1.10884	1.09051	1.07566	1.06149	1.05293	1.03417	1.02304	0.993789	0.965651	0.944908	0.920294	0.898585	0.883168	0.870586	0.857958	0.850399	0.834984	0.827336	0.824445	0.820428	0.812531	0.804113
aux_fc	0.866315	0.857751	0.841495	0.833757	0.827857	0.823947	0.829429	0.82982	0.839686	0.846879	0.850558	0.849471	0.83935	0.833566	0.830495	0.824064	0.823329	0.817673	0.815792	0.813834	0.811449	0.812282	0.814638	0.818226	0.818232	0.823964	0.822873	0.815847	0.801137	0.82628	0.838016	0.842846	0.84473	0.842309	0.834433	0.832202	0.836418	0.841526	0.840649	0.843936	0.842025
aux_fc	0.913525	0.90438	0.899567	0.893721	0.886508	0.884708	0.886789	0.885805	0.894067	0.902619	0.907187	0.90198	0.898564	0.883429	0.877452	0.871941	0.874503	0.870404	0.860621	0.84999	0.842419	0.83895	0.832433	0.827964	0.826787	0.825489	0.831035	0.831335	0.838765	0.838566	0.838929	0.843696	0.847031	0.846516	0.852284	0.855723	0.853379	0.854224	0.84761	0.855154	0.858747
aux_fc	0.884284	0.874406	0.867321	0.869088	0.872474	0.868446	0.865153	0.861185	0.861185	0.866831	0.874065	0.87243	0.857116	0.850331	0.839182	0.832589	0.825162	0.822232	0.821389	0.822474	0.820262	0.82106	0.81809	0.810535	0.803445	0.800743	0.80587	0.804991	0.808377	0.807494
aux_fc	0.876679	0.868806	0.86495	0.857051	0.852163	0.84825	0.85209	0.849478	0.854602	0.860862	0.863925	0.861256	0.863206	0.868554	0.868919	0.870663	0.876129	0.879425	0.879588	0.883056	0.880006	0.881877	0.873999	0.877094	0.878039	0.881631	0.878756	0.878159	0.87393	0.859326	0.850896	0.844913	0.839439	0.836089	0.829458	0.825604	0.81851	0.812633	0.811826	0.808255	0.806387
aux_fc	0.881397	0.880019	0.878903	0.873649	0.863873	0.862691	0.861914	0.866244	0.870053	0.869771	0.880516	0.884741	0.90377	0.920124	0.928987	0.937063	0.941122	0.955498	0.9538	0.952293	0.943343	0.938867	0.932011	0.914909	0.898976	0.887719	0.877947	0.864993	0.851951	0.842763	0.837508	0.834927	0.828527	0.8162	0.807154	0.797449	0.787746	0.782286	0.774235	0.771339	0.765487
aux_fc	0.922401	0.91718	0.918998	0.909196	0.897428	0.889387	0.886105	0.885317	0.888449	0.895572	0.900229	0.901076	0.913594	0.933551	0.95129	0.963812	0.972457	0.969715	0.969099	0.966141	0.968479	0.970273	0.962904	0.953136	0.94801	0.939669	0.935469	0.926918	0.917891	0.909124	0.899612	0.893633	0.887893	0.876178	0.866398	0.860398	0.852519	0.853804	0.845881	0.842824	0.838137
aux_fc	0.856078	0.856341	0.854886	0.845718	0.840866	0.822527	0.807803	0.803207	0.805178	0.800691	0.797331	0.799626	0.807093	0.807199	0.806675
aux_fc	0.833705	0.825738	0.815377	0.809461	0.802776	0.797509	0.802314	0.811352	0.816689	0.82331	0.832157	0.84578	0.857258	0.869279	0.868265	0.866341	0.865493	0.865442	0.863929	0.863857	0.86336	0.848411	0.845279	0.831443	0.820186	0.815683	0.811326	0.80356	0.797287	0.792729	0.793919	0.789951	0.789143	0.785976	0.787468	0.783641	0.778253	0.780675	0.779187	0.778495	0.780763
col_cm	0.996584	0.991566	0.991592	0.991395	0.987837	0.986761	0.979752	0.975019	0.982146	0.98915	0.991316	0.98597	0.988328	0.993425	1.00013	1.00495	1.0047	1.00207	1.00382	1.00046	0.988015	0.976778	0.964911	0.951639	0.938012	0.928594	0.922784	0.914204	0.902697	0.892976	0.889051	0.882961	0.879093	0.868051	0.871262	0.884738	0.876474	0.850406	0.844707	0.84666	0.836766
col_cm	1.0292	1.02816	1.02864	1.02558	1.02525	1.03014	1.03044	1.02822	1.02669	1.02867	1.02351	1.02618	1.01214	1.00629	1.00261	1.01695	1.04266	1.04026	1.04001	1.03208	1.01704	0.999836	0.993303	0.981699	0.967291	0.95839	0.950892	0.939847	0.934045	0.922042	0.917252	0.912123	0.902564	0.889844	0.881525	0.866248	0.865627	0.858558	0.855206	0.855639	0.85495
col_cm	1.02253	1.02054	1.02611	1.02451	1.02241	1.02556	1.02271	1.0248	1.02732	1.0282	1.02553	1.02967	1.03017	1.03125	1.03855	1.0414	1.04298	1.04262	1.03794	1.03631	1.02022	1.0101	0.996085	0.975681	0.959138	0.963101	0.952009	0.941305	0.929657	0.921812	0.912802	0.902458	0.896101	0.889911	0.880033	0.88059	0.871025	0.869484	0.863345	0.861558	0.865765
col_cm	1.00388	1.00777	1.00557	1.01436	1.01086	1.01192	1.01072	1.01332	1.01104	1.01505	1.01545	1.01217	1.00775	1.00694	1.00344	0.997582	0.991792	0.982755	0.97075	0.961001	0.939828	0.929999	0.916693	0.907642	0.890635	0.882656	0.869424	0.869227	0.861343	0.85476	0.841747	0.845103	0.842882	0.840369	0.838664	0.838859	0.838294	0.844511	0.844972	0.852207	0.853108
col_cm	0.944847	0.942793	0.93938	0.938235	0.934674	0.937094	0.935399	0.943166	0.942974	0.9472	0.952342	0.946986	0.950781	0.946856	0.948218	0.944994	0.942267	0.944479	0.946054	0.944465	0.937564	0.928741	0.922163	0.912784	0.904974	0.896437	0.887315	0.872795	0.863433	0.85739	0.847803	0.84248	0.837159	0.831014	0.823147	0.815894	0.811708	0.806165	0.805626	0.807112	0.790654
col_cm	1.00295	1.00841	1.01285	1.0186	1.01682	1.0151	1.00835	1.01098	1.01093	1.0142	1.01514	1.01037	1.01183	1.01272	1.01447	1.01033	1.01087	1.00917	1.00473	1.00111	0.99162	0.986217	0.980403	0.973465	0.969622	0.95995	0.945633	0.943711	0.939101	0.930646	0.922637	0.913404	0.903591	0.897023	0.888876	0.878116	0.868243	0.862872	0.857906	0.851243	0.841075
col_fc	0.854454	0.848615	0.841746	0.837636	0.842211	0.850545	0.866902	0.870661	0.875724	0.87802	0.885856	0.892287	0.903854	0.899176	0.908193	0.925203	0.94702	0.971044	1.00284	1.01985	1.02207	1.02342	1.01995	1.01393	1.00703	0.996672	0.979999	0.961305	0.949552	0.933466	0.915602	0.906861	0.89296	0.881667	0.874678	0.865424	0.859362	0.860832	0.849082	0.836561	0.820833
col_fc	0.906582	0.898493	0.901748	0.893164	0.894386	0.89121	0.887881	0.886634	0.890689	0.905318	0.91685	0.928559	0.932347	0.945703	0.956225	0.969076	0.978737	0.984826	0.970484	1.00118	1.00215	0.982796	0.972253	0.952559	0.948638	0.932646	0.919192	0.906881	0.89246	0.871038	0.863796	0.861831	0.856554	0.849798	0.837793	0.823177	0.817864	0.802582	0.795236	0.786358	0.781788
col_fc	0.874798	0.872933	0.865553	0.859486	0.857758	0.852031	0.848966	0.849511	0.851994	0.859371	0.865783	0.871537	0.871575	0.877557	0.886105	0.88178	0.887911	0.899422	0.903604	0.917865	0.928124	0.941841	0.95062	0.94259	0.932356	0.918547	0.908059	0.892397	0.881314	0.870224	0.859274	0.846406	0.838509	0.833028	0.828967	0.814021	0.805702	0.796553	0.792307	0.783129	0.779061
col_fc	0.855632	0.850051	0.843449	0.832244	0.828597	0.833007	0.841204	0.847825	0.848898	0.852929	0.860261	0.863477	0.866985	0.8696	0.879342	0.894098	0.908968	0.916175	0.918764	0.913967	0.91091	0.898808	0.885105	0.87398	0.860226	0.854143	0.846543	0.840968	0.831942	0.820827	0.810872	0.806133	0.798117	0.791334	0.788808	0.785753	0.780176	0.769915	0.762095	0.754741	0.747195
col_fc	0.880439	0.880103	0.872238	0.861948	0.862937	0.863549	0.861794	0.863675	0.866158	0.873105	0.871173	0.872888	0.873281	0.879566	0.880119	0.882683	0.892188	0.900531	0.906989	0.911541	0.908323	0.903273	0.893361	0.889333	0.880465	0.869995	0.853795	0.84187	0.832924	0.816823	0.797966	0.784722	0.775109	0.763773	0.753916	0.740982	0.740158	0.741058	0.737281	0.732815	0.73944
col_fc	0.871746	0.868872	0.863932	0.85752	0.859544	0.855128	0.861669	0.86469	0.871682	0.880674	0.878554	0.880605	0.890837	0.895919	0.902973	0.915159	0.926099	0.937749	0.943912	0.942673	0.939228	0.938279	0.933804	0.927085	0.915368	0.89957	0.880614	0.869325	0.859425	0.849933	0.835357	0.820946	0.809966	0.800973	0.793557	0.788402	0.784943	0.773568	0.765834	0.758191	0.75138
aux_fc	0.842871	0.833894	0.825421	0.819048	0.807744	0.809276	0.812408	0.809709	0.812652	0.818555	0.823119	0.820682	0.821742	0.809151	0.803493	0.795261	0.791139	0.788174	0.782204	0.770818	0.76201	0.756808	0.74468	0.737429	0.730474	0.723553	0.721975	0.718779	0.718436	0.721375	0.721801	0.715588	0.717994	0.722501	0.719292	0.709708	0.711489	0.709439	0.703621	0.703492	0.706091
aux_fc	0.851128	0.84694	0.839901	0.824902	0.817049	0.816599	0.819986	0.820552	0.837058	0.83865	0.845672	0.848528	0.857745	0.880261	0.910694	0.93959	0.945944	0.940156	0.930389	0.912716	0.892981	0.877822	0.878024	0.868419	0.851618	0.837356	0.824635	0.812198	0.802137	0.796753	0.790258	0.78637	0.781852	0.776316	0.771769	0.769959	0.762978	0.759117	0.754832	0.751014	0.74923
aux_fc	0.827192	0.820218	0.810156	0.808069	0.798057	0.796144	0.79339	0.797144	0.792903	0.792466	0.793854	0.79662	0.801825	0.805473	0.814862	0.833178	0.844102	0.841489	0.847209	0.852033	0.852492	0.848711	0.846419	0.838345	0.828834	0.822437	0.814026	0.809152	0.810616	0.804336	0.802264	0.795443	0.789321	0.781249	0.783649	0.779215	0.773406	0.770277	0.766857	0.769762	0.764288
aux_fc	0.863828	0.855362	0.857733	0.85654	0.857169	0.849051	0.848421	0.84491	0.847292	0.84269	0.838842	0.835817	0.834472	0.833646	0.829412	0.816537	0.809699	0.803656	0.797313	0.793434	0.792448	0.790528	0.782419	0.77916

## Sheet: S3g
geno/cond	length (µm)	elong (µm/min)
aux_fc	80.897	2.69657
aux_fc	65.508	2.1836
aux_fc	114.843	3.8281
aux_fc	102.465	3.4155
aux_fc	118.096	3.93653
aux_fc	103.248	3.4416
aux_fc	62.4	2.08
aux_fc	58.05	1.935
col_fc	109.078	3.63593
col_fc	94.153	3.13843
col_fc	124.475	4.14917
col_fc	108.254	3.60847
col_fc	119.415	3.9805
col_fc	121.112	4.03707
col_fc	142.598	4.75327
col_fc	155.104	5.17013
col_fc	142.56	4.752
col_fc	97.851	3.2617
aux_cm	38.093	1.26977
aux_cm	58.523	1.95077
aux_cm	110.795	3.69317
aux_cm	46.695	1.5565
aux_cm	54.001	1.80003
col_cm	63.565	2.11883
col_cm	63.628	2.12093
col_cm	63.324	2.1108
col_cm	65.899	2.19663
col_cm	55.656	1.8552
col_cm	53.731	1.79103
col_cm	91.176	3.0392
col_cm	87.187	2.90623
col_cm	78.286	2.60953
col_cm	59.766	1.9922
aux_fc	135.641	4.52137
aux_fc	140.488	4.68293
aux_fc	154.192	5.13973
aux_fc	119.986	3.99953
col_fc	162.859	5.42863
col_fc	182.205	6.0735
col_fc	145.799	4.85997
col_fc	212.44	7.08133
col_fc	177.891	5.9297
col_fc	192.421	6.41403
aux_cm	139.145	4.63817
col_cm	106.791	3.5597
col_cm	133.821	4.4607
col_cm	92.111	3.07037
col_cm	86.984	2.89947
col_cm	89.756	2.99187
col_cm	126.977	4.23257

## Sheet: S3h
distance from root tip (µm)	0	20	40	60	80	100	120	140	160	180	200	220	240	260	280	300	320	340	360	380	400	420	440	460	480	500	520	540	560	580	600	620	640	660	680	700	720	740	760	780	800
col_fc	-0.0966914	-0.102998	-0.110231	-0.121449	-0.12175	-0.12781	-0.129634	-0.130813	-0.132713	-0.132164	-0.134773	-0.12793	-0.112008	-0.103807	-0.0918663	-0.0881122	-0.084777	-0.0824771	-0.0756325	-0.0692792	-0.0715051	-0.0673624	-0.0652694	-0.0689722	-0.0691006	-0.0681074	-0.0689482	-0.0648148	-0.0711135	-0.0763803	-0.0771269	-0.0819893	-0.0804437	-0.0789446	-0.07733	-0.0825325	-0.0824363	-0.079574	-0.0818902	-0.0809366	-0.0763803
col_fc	-0.0845777	-0.0977969	-0.0963835	-0.0965362	-0.0936269	-0.0934722	-0.094647	-0.0977204	-0.098416	-0.0892051	-0.0799484	-0.0662739	-0.0372414	-0.0194444	-0.000293436	0.0160305	0.0310873	0.0476688	0.0566655	0.050771	0.0483036	0.0394688	0.0364286	0.0343944	0.0360707	0.0317401	0.0243228	0.0132046	-0.00272945	-0.0108419	-0.0162619	-0.0272738	-0.0353552	-0.0430346	-0.0531519	-0.0553318	-0.0624317	-0.0637678	-0.0666992	-0.0706543	-0.0751597
col_fc	-0.110905	-0.114564	-0.121371	-0.130249	-0.128027	-0.126583	-0.121861	-0.115072	-0.109096	-0.101373	-0.106443	-0.0898896	-0.0906663	-0.0846142	-0.0748789	-0.0683917	-0.0599209	-0.0518097	-0.0259219	-0.00778032	0.0244346	0.0578105	0.084656	0.0967298	0.108909	0.112434	0.107018	0.106279	0.107873	0.102181	0.0961079	0.0815654	0.0743596	0.0677904	0.0583783	0.0565845	0.0519725	0.0405682	0.0324244	0.0181617	0.0103239
col_fc	-0.124748	-0.14198	-0.149654	-0.157094	-0.150596	-0.154293	-0.156019	-0.158947	-0.163369	-0.15149	-0.145815	-0.130734	-0.116202	-0.104016	-0.091301	-0.0731133	-0.058852	-0.0534027	-0.0427913	-0.0279717	-0.0157327	0.000455726	0.0152747	0.0204418	0.0224131	0.0207066	0.0129921	0.0082705	0.00204257	0.00168059	-0.00138171	-0.00291677	-0.00861662	-0.00975463	-0.0154659	-0.0262553	-0.0225623	-0.0226855	-0.0293113	-0.0391223	-0.0462543
col_fc	-0.0836251	-0.0963414	-0.104929	-0.11251	-0.103632	-0.105092	-0.098735	-0.0958461	-0.0908831	-0.0869163	-0.0884486	-0.082831	-0.0680385	-0.0398058	-0.0235745	-0.0114826	0.00583922	0.00911913	0.0140848	0.0136084	0.0224023	0.0258595	0.0202624	0.0200378	0.0124905	0.00648607	-0.00098717	-3.24e-05	-0.00422886	-0.00577669	-0.000196941	-0.00594095	-0.00667463	-0.00860977	-0.0150405	-0.0217861	-0.0220412	-0.0264779	-0.0323519	-0.0388307	-0.0429008
col_fc	-0.0493724	-0.0562324	-0.060271	-0.0635157	-0.0626147	-0.0594115	-0.0585458	-0.0574417	-0.0615804	-0.0592516	-0.0559316	-0.0569608	-0.0515535	-0.0446281	-0.034744	-0.0285635	-0.0215256	-0.0147516	-0.00381141	-0.00247315	0.00425021	0.00922028	0.0048953	-0.0022491	-0.025223	-0.0340757	-0.0369834	-0.0443039	-0.045687	-0.0521526	-0.0524508	-0.0475278	-0.03956	-0.0293208	-0.030358	-0.0266597	-0.0249705	-0.0246166	-0.0228237	-0.015513	-0.00504507
col_fc	-0.0503976	-0.0554257	-0.0590018	-0.0642126	-0.0591103	-0.0651856	-0.0661317	-0.0687577	-0.0634781	-0.05516	-0.0447006	-0.0321362	-0.0264462	-0.0180704	-0.00527497	-0.00192249	0.0118606	0.0211327	0.036429	0.0517811	0.0607777	0.0627827	0.0505563	0.0532912	0.0434616	0.040849	0.030968	0.0171562	0.00269581	-0.00601261	-0.0120506	-0.0194843	-0.0217348	-0.0265666	-0.0338112	-0.0384772	-0.0422875	-0.0407281	-0.045326	-0.0440071	-0.0415025
col_fc	-0.0595506	-0.0652522	-0.071572	-0.0755244	-0.063338	-0.0541498	-0.0422276	-0.0252666	-0.00320249	0.00881896	0.0146057	0.018165	0.0337193	0.0282318	0.0306169	0.0329902	0.0366438	0.0490751	0.0578157	0.0801912	0.101813	0.129839	0.141883	0.156429	0.162855	0.154891	0.155101	0.148204	0.131434	0.113867	0.101939	0.0841811	0.0791831	0.0673226	0.0582691	0.0484638	0.0387235	0.0328517	0.0242571	0.0113082	-0.00219986
col_fc	-0.0531622	-0.0524266	-0.0568866	-0.0603512	-0.0486776	-0.0466714	-0.0380115	-0.0337135	-0.0295083	-0.0170657	-0.00861658	0.0116209	0.0287613	0.0496927	0.0719073	0.0798099	0.0716299	0.0725649	0.0690445	0.0459737	0.0260893	0.0107461	-0.00521388	-0.0222113	-0.0327924	-0.0448485	-0.0512953	-0.0641218	-0.076181	-0.0776167	-0.077728	-0.0822467	-0.0830522	-0.0814333	-0.0856561	-0.0837583	-0.0860989	-0.0853073	-0.0795967	-0.0741845	-0.0686162
col_fc	-0.0625095	-0.0748831	-0.0778511	-0.0912802	-0.0873877	-0.0841629	-0.0840285	-0.0753804	-0.0655983	-0.0639761	-0.051534	-0.0419093	-0.0269451	-0.0125038	-0.00280863	0.0214926	0.0343011	0.0360435	0.0382791	0.0371963	0.0304879	0.0295687	0.0292826	0.0354999	0.0319707	0.0340112	0.0190832	0.00293588	-0.00598955	-0.0190402	-0.0274419	-0.0335919	-0.0359739	-0.0391359	-0.0397018	-0.0495742	-0.0505206	-0.0469461	-0.0466737	-0.0518632	-0.0565073
col_fc	-0.145546	-0.156065	-0.166368	-0.17667	-0.172483	-0.16897	-0.158314	-0.16113	-0.162415	-0.163973	-0.160936	-0.157054	-0.149427	-0.158242	-0.154585	-0.141379	-0.125603	-0.104259	-0.0720747	-0.0517868	-0.0379524	-0.0226779	-0.0122657	-0.00349388	0.0048323	0.00764183	0.00529359	-0.00141047	-0.00134504	-0.0058678	-0.0104249	-0.00989931	-0.0135995	-0.0154269	-0.0154226	-0.0191342	-0.0184946	-0.0105584	-0.0180201	-0.0278328	-0.0397878
col_fc	-0.093418	-0.106187	-0.106367	-0.121142	-0.120309	-0.128305	-0.137335	-0.145158	-0.14745	-0.136675	-0.129942	-0.120782	-0.120934	-0.111715	-0.106553	-0.0975061	-0.0938849	-0.0904774	-0.104426	-0.0704624	-0.0578755	-0.0632994	-0.0599584	-0.0648667	-0.0535631	-0.0563837	-0.0555132	-0.0558344	-0.0584379	-0.0682959	-0.0622311	-0.0549293	-0.0500054	-0.0472964	-0.0523084	-0.061381	-0.0599929	-0.0688091	-0.0718654	-0.0780357	-0.0788322
col_fc	-0.125202	-0.131747	-0.142562	-0.15482	-0.156937	-0.167485	-0.17625	-0.18228	-0.186145	-0.182622	-0.181009	-0.177803	-0.181706	-0.179861	-0.176673	-0.184801	-0.184712	-0.175881	-0.171306	-0.153776	-0.131902	-0.104254	-0.0815912	-0.074836	-0.0698449	-0.0704834	-0.066646	-0.0703179	-0.0695831	-0.06911	-0.0667533	-0.0703544	-0.068051	-0.064066	-0.061134	-0.0705374	-0.0721544	-0.0748373	-0.0747952	-0.0812651	-0.0815599
col_fc	-0.144368	-0.154629	-0.164665	-0.182062	-0.186098	-0.186508	-0.184012	-0.183967	-0.189241	-0.189064	-0.186531	-0.185863	-0.186296	-0.187818	-0.183436	-0.172484	-0.163654	-0.159128	-0.156147	-0.157674	-0.149116	-0.147287	-0.147106	-0.143445	-0.141975	-0.134888	-0.128162	-0.121747	-0.118956	-0.118507	-0.115155	-0.110627	-0.108442	-0.10576	-0.101293	-0.0988048	-0.0976812	-0.101475	-0.105007	-0.109653	-0.113425
col_fc	-0.119561	-0.124577	-0.135876	-0.152358	-0.151758	-0.155967	-0.163422	-0.168116	-0.171981	-0.168887	-0.175619	-0.176453	-0.180001	-0.177852	-0.182659	-0.183898	-0.180434	-0.174772	-0.167921	-0.1601	-0.151702	-0.142822	-0.13885	-0.128093	-0.121736	-0.119035	-0.12091	-0.120846	-0.117973	-0.122511	-0.128061	-0.132037	-0.13145	-0.133321	-0.136185	-0.143576	-0.137699	-0.130333	-0.129821	-0.131579	-0.121181
col_fc	-0.128254	-0.135809	-0.144182	-0.156786	-0.155151	-0.164388	-0.163547	-0.167102	-0.166457	-0.161319	-0.168239	-0.168736	-0.162445	-0.1615	-0.159805	-0.151423	-0.146523	-0.137555	-0.130998	-0.128968	-0.120797	-0.107816	-0.0984071	-0.0903404	-0.0868334	-0.0894603	-0.0940914	-0.0933901	-0.0914727	-0.089401	-0.0906705	-0.0958135	-0.0965935	-0.0961207	-0.0965438	-0.0961563	-0.0929136	-0.0978228	-0.101267	-0.106203	-0.10924
aux_fc	-0.074361	-0.082335	-0.101137	-0.107126	-0.110397	-0.114863	-0.110036	-0.105934	-0.0931651	-0.0806274	-0.0696134	-0.0658743	-0.0697302	-0.069283	-0.0678729	-0.0668235	-0.0641585	-0.0651202	-0.0656261	-0.0634846	-0.0594393	-0.0557978	-0.052302	-0.0455346	-0.0434872	-0.0361028	-0.035016	-0.0405977	-0.0527935	-0.026422	-0.0140052	-0.00997702	-0.00498987	-0.0111404	-0.018895	-0.0199611	-0.0172211	-0.00967425	-0.0124574	-0.00767426	-0.0109643
aux_fc	-0.0271509	-0.0357066	-0.043065	-0.047162	-0.0517454	-0.054102	-0.0526766	-0.0499485	-0.0387841	-0.0248871	-0.0129851	-0.0133654	-0.0105165	-0.0194206	-0.020916	-0.0189462	-0.0129847	-0.0123894	-0.0207968	-0.0273284	-0.0284698	-0.0291302	-0.0345074	-0.0357965	-0.034933	-0.0345778	-0.0268536	-0.025109	-0.0151662	-0.0141362	-0.0130919	-0.0091262	-0.0026892	-0.00693334	-0.00104429	0.00356074	-0.000260926	0.00302366	-0.00549664	0.00354392	0.0057579
aux_fc	-0.0563922	-0.0656803	-0.075311	-0.0717953	-0.0657796	-0.070364	-0.0743122	-0.0745693	-0.0716664	-0.0606759	-0.046107	-0.0429157	-0.051964	-0.0525179	-0.0591863	-0.0582984	-0.0623258	-0.0605613	-0.0600286	-0.0548449	-0.0506272	-0.0470199	-0.0488503	-0.0532256	-0.0582748	-0.0593235	-0.0520181	-0.0514529	-0.0455538	-0.0452074	NA	NA	NA	NA	NA	NA	NA	NA	NA	NA	NA
aux_fc	-0.0639969	-0.0712803	-0.0776822	-0.0838315	-0.0860902	-0.0905601	-0.0873757	-0.086276	-0.0782498	-0.066645	-0.0562464	-0.0540897	-0.0458745	-0.0342956	-0.0294495	-0.0202248	-0.0113592	-0.00336853	-0.00183	0.00573719	0.00911745	0.0137965	0.00705935	0.0133333	0.0163193	0.0215643	0.0208674	0.0217143	0.0199994	0.00662425	-0.00112505	-0.00790983	-0.0102809	-0.0173607	-0.02387	-0.0265582	-0.0351295	-0.0385671	-0.0412804	-0.0433546	-0.0466029
aux_fc	-0.059279	-0.060067	-0.0637292	-0.0672336	-0.0743802	-0.0761194	-0.0775509	-0.0695095	-0.0627982	-0.0577357	-0.039656	-0.0306046	-0.0053103	0.0172749	0.0306193	0.0461755	0.0536338	0.0727043	0.0723824	0.0749742	0.0724538	0.0707871	0.0650711	0.0511481	0.0372568	0.0276529	0.020058	0.00854871	-0.00197966	-0.00993878	-0.0145133	-0.0178952	-0.0211926	-0.0372488	-0.0461744	-0.0547137	-0.0658937	-0.0689139	-0.078872	-0.0802708	-0.0875029
aux_fc	-0.018275	-0.0229068	-0.023634	-0.0316864	-0.0408259	-0.0494234	-0.0533603	-0.0504371	-0.0444021	-0.0319344	-0.0199425	-0.0142694	0.00451386	0.0307014	0.0529222	0.0729243	0.0849693	0.0869218	0.0876812	0.088822	0.0975904	0.102192	0.0959644	0.0893747	0.0862902	0.079603	0.0775804	0.0704736	0.0639604	0.056422	0.0475908	0.0408104	0.038173	0.0227291	0.0130701	0.00823545	-0.0011205	0.00260434	-0.00722565	-0.00878588	-0.0148524
aux_fc	-0.084598	-0.083745	-0.087746	-0.0951651	-0.0973879	-0.116283	-0.131662	-0.132547	-0.127673	-0.126815	-0.122841	-0.11572	-0.101988	-0.0956503	-0.0916928	NA	NA	NA	NA	NA	NA	NA	NA	NA	NA	NA	NA	NA	NA	NA	NA	NA	NA	NA	NA	NA	NA	NA	NA	NA	NA
aux_fc	-0.106971	-0.114349	-0.127255	-0.131422	-0.135478	-0.141301	-0.137151	-0.124402	-0.116163	-0.104196	-0.0880151	-0.0695652	-0.0518224	-0.0335704	-0.0301034	-0.0245465	-0.0219948	-0.0173518	-0.0174889	-0.0134614	-0.00752841	-0.0196689	-0.0216609	-0.0323179	-0.0415335	-0.0443834	-0.0465625	-0.0528847	-0.0566441	-0.0599731	-0.0581026	-0.0628712	-0.0605772	-0.0674736	-0.06586	-0.0685214	-0.0753871	-0.0705253	-0.07392	-0.0731145	-0.0722263
aux_fc	-0.0978049	-0.106193	-0.117211	-0.121834	-0.13051	-0.129535	-0.127057	-0.126045	-0.1202	-0.108952	-0.0970524	-0.0946634	-0.0873378	-0.0936979	-0.0948749	-0.0956269	-0.0963493	-0.0946199	-0.0992139	-0.106501	-0.108879	-0.111273	-0.12226	-0.126332	-0.131246	-0.136514	-0.135913	-0.137665	-0.135495	-0.131327	-0.13022	-0.137235	-0.131726	-0.130948	-0.134036	-0.142455	-0.14215	-0.141761	-0.149486	-0.148118	-0.146899
aux_fc	-0.0895478	-0.0931469	-0.102731	-0.115981	-0.121204	-0.122211	-0.119479	-0.115202	-0.0957934	-0.0888561	-0.0744994	-0.0668175	-0.0513353	-0.0225881	0.012326	0.0487023	0.0584558	0.057362	0.0489711	0.0353972	0.0220918	0.00974149	0.0110841	0.00465798	-0.0101012	-0.02271	-0.0332539	-0.0442458	-0.0517935	-0.0559484	-0.0617636	-0.0664526	-0.0678681	-0.0771334	-0.0815591	-0.0822033	-0.0906614	-0.0920832	-0.0982753	-0.100596	-0.10376
aux_fc	-0.113484	-0.119868	-0.132476	-0.132814	-0.140197	-0.142667	-0.146075	-0.13861	-0.139948	-0.13504	-0.126318	-0.118725	-0.107256	-0.097376	-0.0835065	-0.0577091	-0.0433854	-0.0413045	-0.0342089	-0.0252853	-0.0183969	-0.0193691	-0.020521	-0.0254163	-0.0328852	-0.0376295	-0.0438628	-0.0472921	-0.0433144	-0.048366	-0.049757	-0.0573794	-0.060399	-0.0722003	-0.0696789	-0.0729477	-0.0802333	-0.080923	-0.0862499	-0.0818475	-0.0887012
aux_fc	-0.0768474	-0.0847243	-0.0848986	-0.0843424	-0.0810846	-0.0897596	-0.0910439	-0.0908438	-0.085559	-0.0848164	-0.0813297	-0.0795283	-0.0746086	-0.0692033	-0.0689563	-0.0743503	-0.0777886	-0.0791372	-0.0841045	-0.0838846	-0.0784406	-0.0775527	-0.0845212	-0.0846004	NA	NA	NA	NA	NA	NA	NA	NA	NA	NA	NA	NA	NA	NA	NA	NA	NA
