# Supplementary material for: The AUX1-AFB1-CNGC14 module establishes a longitudinal root surface pH profile
Source: eLife. 2023 Jul 14;12:e85193. doi: 10.7554/eLife.85193 (PMC10414970; doi:10.7554/eLife.85193)
Supplement: Figure 3—source data 1. [file elife-85193-fig3-data1.xlsx]

## Sheet: 3b
distance from root tip (µm)	CM	IAA 1nM	IAA 10nM	IAA 100nM	IAA 1000nM
0	1.0252	1.03135	1.04003	1.04958	1.04401
20	1.0259	1.03121	1.04094	1.04863	1.04437
40	1.02692	1.0327	1.04269	1.04857	1.04493
60	1.02842	1.03465	1.04489	1.05053	1.0479
80	1.02978	1.0364	1.04641	1.05322	1.05
100	1.029	1.03734	1.04841	1.05492	1.05106
120	1.02874	1.03918	1.05133	1.05874	1.05465
140	1.02991	1.0401	1.05358	1.06276	1.05953
160	1.03047	1.03917	1.05478	1.06637	1.06417
180	1.03241	1.04083	1.0572	1.07353	1.06952
200	1.03336	1.04457	1.05818	1.08064	1.07504
220	1.03314	1.04646	1.06101	1.08653	1.08147
240	1.03221	1.04721	1.06638	1.09361	1.08736
260	1.03209	1.04734	1.07055	1.0995	1.09412
280	1.02953	1.04632	1.07548	1.10239	1.09878
300	1.02347	1.04542	1.08019	1.1055	1.10205
320	1.01785	1.04365	1.08277	1.10773	1.10422
340	1.01455	1.04092	1.08382	1.1082	1.10442
360	1.01125	1.03565	1.08054	1.1078	1.10468
380	1.00451	1.02926	1.0794	1.10557	1.10377
400	0.9969	1.02038	1.07561	1.10285	1.10344
420	0.987447	1.00967	1.06883	1.09885	1.10167
440	0.977981	1.00031	1.06	1.09384	1.09973
460	0.968643	0.989893	1.05354	1.08981	1.09662
480	0.958541	0.980126	1.04544	1.08572	1.09383
500	0.949369	0.97093	1.03766	1.08332	1.09051
520	0.942426	0.962362	1.03111	1.08069	1.08786
540	0.935169	0.954512	1.02524	1.07749	1.08569
560	0.927562	0.946748	1.0196	1.07524	1.08188
580	0.921828	0.939853	1.01401	1.07277	1.07875
600	0.915437	0.933033	1.00901	1.06871	1.07473

## Sheet: 3c
condition	length (µm)	elongation (µm/min)
Col0_IAA0	152.963	3.82408
Col0_IAA0	109.172	2.7293
Col0_IAA0	115.589	2.88972
Col0_IAA0	100.847	2.52117
Col0_IAA0	109.851	2.74627
Col0_IAA1	88.275	2.20688
Col0_IAA1	101.943	2.54858
Col0_IAA1	67.244	1.6811
Col0_IAA1	121.03	3.02575
Col0_IAA1	99.787	2.49467
Col0_IAA10	67.742	1.69355
Col0_IAA10	68.089	1.70223
Col0_IAA10	81.747	2.04367
Col0_IAA10	52.207	1.30517
Col0_IAA10	52.293	1.30733
Col0_IAA100	32.816	0.8204
Col0_IAA100	27.697	0.692425
Col0_IAA100	22.11	0.55275
Col0_IAA100	33.976	0.8494
Col0_IAA100	23.386	0.58465
Col0_IAA1000	30.642	0.76605
Col0_IAA1000	20.02	0.5005
Col0_IAA1000	26.452	0.6613
Col0_IAA1000	20.357	0.508925
Col0_IAA1000	27.04	0.676
Col0_IAA100	44.618	1.11545
Col0_IAA100	43.405	1.08512
Col0_IAA100	29.618	0.74045
Col0_IAA100	50.276	1.2569
Col0_IAA1000	19.081	0.477025
Col0_IAA1000	15.75	0.39375
Col0_IAA1000	28.536	0.7134
Col0_IAA1000	27.522	0.68805
Col0_IAA1000	39.995	0.999875
Col0_IAA10	37.05	0.92625
Col0_IAA10	47.619	1.19047
Col0_IAA10	63.467	1.58668
Col0_IAA10	51.712	1.2928
Col0_IAA10	79.604	1.9901
Col0_IAA1	92.657	2.31643
Col0_IAA1	135.942	3.39855
Col0_IAA1	87.462	2.18655
Col0_IAA1	106.223	2.65557
Col0_IAA1	102.993	2.57483
Col0_IAA0	121.02	3.0255
Col0_IAA0	135.895	3.39737
Col0_IAA0	99.709	2.49273
Col0_IAA0	111.737	2.79343
Col0_IAA0	116.917	2.92293
Col0_IAA100	38.875	0.971875
Col0_IAA100	33.018	0.82545
Col0_IAA100	30.771	0.769275
Col0_IAA100	36.879	0.921975
Col0_IAA100	24.848	0.6212
Col0_IAA100	29.883	0.747075
Col0_IAA1000	23.649	0.591225
Col0_IAA1000	24.529	0.613225
Col0_IAA1000	33.9	0.8475
Col0_IAA1000	26.337	0.658425
Col0_IAA1000	28.477	0.711925
Col0_IAA1000	30.265	0.756625
Col0_IAA10	73.183	1.82957
Col0_IAA10	69.644	1.7411
Col0_IAA10	92.859	2.32147
Col0_IAA10	96.481	2.41202
Col0_IAA10	87.614	2.19035
Col0_IAA10	83.557	2.08893
Col0_IAA1	105.164	2.6291
Col0_IAA1	135.34	3.3835
Col0_IAA1	124.475	3.11187
Col0_IAA1	130.22	3.2555
Col0_IAA1	115.334	2.88335
Col0_IAA1	92.873	2.32183
Col0_IAA0	121.232	3.0308
Col0_IAA0	150.584	3.7646
Col0_IAA0	136.1	3.4025
Col0_IAA0	128.526	3.21315
Col0_IAA0	143.112	3.5778
Col0_IAA100	30.265	0.756625
Col0_IAA100	43.293	1.08232
Col0_IAA100	45.154	1.12885
Col0_IAA100	35.239	0.880975
Col0_IAA100	27.212	0.6803
Col0_IAA100	26.222	0.65555
Col0_IAA1000	25.656	0.6414
Col0_IAA1000	22.014	0.55035
Col0_IAA1000	23.335	0.583375
Col0_IAA1000	32.469	0.811725
Col0_IAA1000	37.108	0.9277
Col0_IAA1000	40.581	1.01452
Col0_IAA10	44.547	1.11367
Col0_IAA10	93.603	2.34008
Col0_IAA10	78.837	1.97093
Col0_IAA10	89.77	2.24425
Col0_IAA10	52.811	1.32028
Col0_IAA10	66.91	1.67275
Col0_IAA1	97.025	2.42563
Col0_IAA1	94.06	2.3515
Col0_IAA1	112.631	2.81577
Col0_IAA1	102.536	2.5634
Col0_IAA1	73.831	1.84577
Col0_IAA0	109.835	2.74587
Col0_IAA0	84.536	2.1134
Col0_IAA0	82.441	2.06102
Col0_IAA0	114.405	2.86013
Col0_IAA0	113.561	2.83902
Col0_IAA0	132.977	3.32443
Col0_IAA10	96.211	2.40528
Col0_IAA10	76.914	1.92285
Col0_IAA10	111.643	2.79108
Col0_IAA10	89.398	2.23495
Col0_IAA10	94.779	2.36947
Col0_IAA10	87.512	2.1878
Col0_IAA10	102.313	2.55782
Col0_IAA10	83.165	2.07912
Col0_IAA10	91.008	2.2752
Col0_IAA10	85.332	2.1333
Col0_IAA100	43.335	1.08337
Col0_IAA100	33.743	0.843575
Col0_IAA100	29.336	0.7334
Col0_IAA100	35.342	0.88355
Col0_IAA100	39.112	0.9778
Col0_IAA100	32.524	0.8131
Col0_IAA100	26.16	0.654
Col0_IAA1000	26.737	0.668425
Col0_IAA1000	23.961	0.599025
Col0_IAA1000	25.324	0.6331
Col0_IAA1000	31.113	0.777825
Col0_IAA1000	23.656	0.5914
Col0_IAA1000	30.8	0.77
Col0_IAA1	78.76	1.969
Col0_IAA1	115.756	2.8939
Col0_IAA1	107.582	2.68955
Col0_IAA1	96.778	2.41945
Col0_IAA1	127.832	3.1958
Col0_IAA1	113.433	2.83582
Col0_IAA1	99.372	2.4843
Col0_IAA0	151.529	3.78823
Col0_IAA0	135.55	3.38875
Col0_IAA0	96.289	2.40722
Col0_IAA0	111.056	2.7764
Col0_IAA0	146.924	3.6731
Col0_IAA0	97.305	2.43262
Col0_IAA0	109.948	2.7487

## Sheet: 3ef
distance from root tip (µm)	0	20	40	60	80	100	120	140	160	180	200	220	240	260	280	300	320	340	360	380	400	420	440	460	480	500	520	540	560	580	600	620	640	660	680	700	720	740	760	780	800
col_cm	1.01495	1.02361	1.02836	1.0351	1.04112	1.04659	1.04348	1.04526	1.05539	1.05594	1.05998	1.06022	1.05568	1.03413	1.02947	1.05399	1.04275	1.07255	1.06922	1.07781	1.08629	1.08008	1.07142	1.0561	1.03956	1.02785	1.02002	1.00195	0.991007	0.982516	0.972946	0.967749	0.959802	0.955291	0.940054	0.944504	0.932906	0.923573	0.915906	0.909201	0.908442
col_cm	1.00836	1.01052	1.00394	1.01236	1.01753	1.02369	1.02674	1.00647	1.00025	1.00954	1.0036	1.02286	1.03028	1.02597	1.00838	1.01529	0.997154	0.984907	0.979845	0.952155	0.950362	0.932775	0.920229	0.910534	0.899392	0.890964	0.879818	0.870008	0.867269	0.857175	0.84731	0.844756	0.855673	0.848222	0.854251	0.850657	0.855332	0.870193	0.864354	0.868013	0.870538
col_cm	1.00322	1.00631	1.01318	1.02318	1.02657	1.03305	1.03164	1.03382	1.03444	1.03084	1.03339	1.0427	1.04321	1.04098	1.04293	1.05974	1.06428	1.0517	1.04472	1.02279	1.00322	0.989572	0.977709	0.960291	0.949975	0.936168	0.927291	0.912533	0.910886	0.904517	0.900383	0.896104	0.881523	0.874077	0.869286	0.858663	0.85773	0.85835	0.854274	0.851121	0.848877
col_cm	0.997802	1.00117	1.00921	1.00651	1.01246	1.02183	1.02568	1.02324	1.01762	1.01625	0.968672	0.964511	1.01406	1.0285	1.02726	1.02357	1.02685	1.02861	1.01855	1.00784	0.998646	0.985036	0.964025	0.951013	0.940342	0.936233	0.924974	0.91448	0.903544	0.89284	0.899723	0.896233	0.888369	0.882614	0.877788	0.8725	0.869231	0.865275	0.863082	0.864246	0.852943
col_cm	0.996706	1.00525	1.01132	1.01193	1.02209	1.0262	1.02514	1.0333	1.03315	1.02033	1.02357	1.03129	1.03031	1.03354	1.03293	1.03804	1.04162	1.03598	1.03545	1.03712	1.0359	1.02134	1.00977	1.00464	0.998067	0.972838	0.954784	0.932598	0.927532	0.919938	0.904826	0.900992	0.888189	0.880454	0.87943	0.875916	0.871237	0.860537	0.859817	0.856878	0.861796
col_cm	0.980295	0.98401	0.989548	0.996117	0.99884	1.00842	1.01587	1.01294	1.01748	1.02156	1.02115	1.02069	1.02208	1.02455	1.02623	1.03367	1.04021	1.04818	1.05046	1.05261	1.04837	1.0294	1.01581	1.00534	0.995569	0.979724	0.957307	0.949731	0.930819	0.921596	0.913929	0.909082	0.901678	0.885274	0.878508	0.873031	0.859526	0.864126	0.862473	0.86049	0.860238
col_cm	0.998678	1.00966	1.01198	1.02934	1.03027	1.02991	1.02074	0.994494	1.01059	1.0263	1.04693	1.05316	1.05774	1.06423	1.07053	1.0681	1.06862	1.0762	1.06884	1.06589	1.04691	1.03427	1.01411	1.0046	0.998787	0.98704	0.972873	0.953573	0.938253	0.932541	0.932125	0.918855	0.911037	0.905813	0.900802	0.892968	0.884186	0.881085	0.884727	0.887905	0.884929
col_cm	1.00689	1.01142	1.00839	1.01023	1.00467	0.990246	0.992988	0.969696	0.951884	0.960776	0.973565	0.978086	0.97978	0.977043	0.981707	0.977558	0.985481	0.992491	0.993386	0.988251	0.978478	0.968395	0.943721	0.92557	0.918199	0.905975	0.884572	0.87606	0.861501	0.85854	0.852636	0.837606	0.823552	0.818972	0.814677	0.809388	0.806014	0.809714	0.80625	0.79743	0.795694
col_cm	0.984561	0.982648	0.991991	0.98944	0.983082	0.982507	0.983658	0.97859	0.976638	0.971446	0.972251	0.971073	0.97402	0.982619	0.98059	0.98105	0.976632	0.973332	0.989624	0.983051	0.978098	0.977879	0.958345	0.954374	0.9459	0.932591	0.913374	0.894642	0.886826	0.872583	0.86072	0.848617	0.836074	0.832947	0.827351	0.817708	0.809368	0.806401	0.800246	0.791055	0.789022
col_cm	1.01876	1.01973	1.0224	1.02066	1.02046	1.01842	1.01053	1.01446	1.01338	1.00494	1.00906	1.00539	1.00369	1.00912	1.00213	1.00146	1.00296	1.00984	1.0149	1.01703	1.01331	1.00777	1.00052	0.993421	0.981593	0.967629	0.961903	0.949325	0.935752	0.934495	0.920576	0.907126	0.901247	0.891218	0.88971	0.880721	0.872351	0.860646	0.855252	0.85837	0.844599
col_cm	0.989783	0.993411	0.999586	1.00302	1.00158	0.997957	0.997563	0.988215	0.991083	1.00277	0.990942	0.984257	0.976084	0.992002	0.99991	0.995474	1.01126	1.03157	1.04395	1.04568	1.04324	1.04025	1.0357	1.01097	0.988548	0.966619	0.945519	0.930924	0.90874	0.892581	0.875308	0.862508	0.857245	0.83815	0.829854	0.828817	0.819143	0.809658	0.808234	0.80471	0.794201
col_cm	0.999609	1.00238	1.00346	0.994489	0.991039	0.983822	0.993408	0.997191	0.989687	1.00238	0.998855	0.999936	1.00873	1.01097	1.01291	1.01499	0.999765	0.999745	0.991568	0.975178	0.964346	0.954791	0.942033	0.927181	0.917764	0.908742	0.908078	0.896045	0.90354	0.898716	0.900462	0.892798	0.879414	0.880402	0.874203	0.879459	0.876846	0.889047	0.899328	0.904506	0.895287
col_cm	0.994008	0.997881	1.00492	1.00856	1.00166	1.00611	1.00386	1.00451	1.01217	0.999499	1.00202	1.01446	1.00823	1.01286	1.01719	1.02273	1.02909	1.03007	1.02492	1.03243	1.02963	1.0281	1.01927	1.00509	0.989266	0.975559	0.976218	0.970636	0.957943	0.951822	0.934606	0.923251	0.904624	0.886769	0.882105	0.879532	0.876914	0.876096	0.875884	0.863974	0.853732
col_cm	1.01608	1.01901	1.01565	1.02383	1.02604	1.03793	1.03738	1.03904	1.04265	1.03804	1.03736	1.0493	1.04283	1.03092	1.01701	0.981661	1.00637	1.05034	1.06561	1.06291	1.05017	1.03821	1.02478	1.01308	1.00352	0.983005	0.967647	0.972283	0.958968	0.937709	0.9265	0.918084	0.916151	0.904148	0.893692	0.885508	0.88747	0.889863	0.869039	0.873391	0.870679
col_cm	1.01448	1.02313	1.02475	1.03153	1.0276	1.03726	1.03237	1.02939	1.0336	1.02743	1.02579	1.03983	1.03388	1.03825	1.03855	1.04698	1.052	1.06	1.06124	1.07499	1.07766	1.06445	1.0512	1.03467	1.01914	0.999332	0.982494	0.98007	0.975276	0.95419	0.950035	0.924877	0.901363	0.891563	0.880138	0.887254	0.892148	0.881797	0.870368	0.860558	0.865685
col_cm	0.966268	0.944229	0.93036	0.962428	0.966457	0.98018	0.997726	1.0089	1.01315	1.03444	1.04159	1.04612	1.0396	1.0461	1.06363	1.06414	1.07062	1.06448	1.05886	1.05663	1.03593	1.03037	1.01463	0.992401	0.97788	0.95505	0.935842	0.925071	0.915573	0.905032	0.896683	0.890274	0.875293	0.855569	0.858894	0.860571	0.859122	0.866519	0.859639	0.854755	0.855178
col_cm	0.996794	1.00414	1.009	1.01102	1.00951	1.01372	1.01684	1.01938	1.01271	1.0072	1.03756	1.04258	1.04958	1.05963	1.06154	1.02782	1.03931	1.08459	1.07318	1.08348	1.08561	1.08229	1.06615	1.0473	1.01958	1.00827	0.999651	0.980674	0.957368	0.964238	0.945973	0.925241	0.919469	0.904619	0.894876	0.892172	0.880288	0.870993	0.873773	0.868293	0.858298
col_cm	1.00531	1.01052	1.00091	1.00212	1.00063	0.965965	0.979811	0.993553	0.999416	1.00373	1.00948	1.02281	1.0311	1.0241	1.03368	1.06364	1.06679	1.06839	1.06915	1.05562	1.04841	1.03864	1.03903	1.02575	1.02048	1.0104	0.991984	0.979088	0.968834	0.950807	0.932207	0.923419	0.907838	0.901112	0.883904	0.869102	0.86085	0.864711	0.86189	0.860884	0.858026
col_cm	1.00584	1.00743	1.00931	1.00014	1.00061	1.00252	1.00373	0.981229	0.965179	1.03137	1.03201	1.03608	1.04072	1.0489	1.05034	1.04911	1.04262	1.03636	1.02549	1.01997	1.00732	0.995549	0.975792	0.930962	0.948174	0.940003	0.917066	0.902676	0.891369	0.889338	0.883832	0.886156	0.885527	0.876589	0.868766	0.863766	0.857414	0.851357	0.86018	0.865318	0.864754
col_cm	1.00161	0.994473	0.992668	1.00434	0.997996	0.993785	0.999979	1.00493	1.0098	1.02039	1.02873	1.04051	1.03582	1.05478	1.04959	1.03307	1.02462	1.0251	1.01339	0.995031	0.989886	0.992465	0.96935	0.943409	0.941772	0.918411	0.900151	0.890028	0.880386	0.857529	0.860023	0.857998	0.857354	0.858987	0.853444	0.854856	0.863501	0.86827	0.87481	0.878865	0.872348
col_iaa	1.05345	1.05986	1.06187	1.05758	1.06685	1.0746	1.08688	1.08672	1.09649	1.10693	1.10912	1.12598	1.13299	1.13435	1.14885	1.16165	1.16295	1.15759	1.15543	1.16643	1.16793	1.15505	1.16435	1.16209	1.15968	1.16502	1.15368	1.14598	1.14234	1.14037	1.14299	1.12183	1.12829	1.14033	1.12916	1.12025	1.12718	1.13311	1.11526	1.09542	1.08529
col_iaa	1.03591	1.04595	1.05321	1.06037	1.0628	1.06106	1.06932	1.05918	1.06183	1.05919	1.08682	1.10996	1.10996	1.13248	1.15284	1.17152	1.16528	1.16503	1.15525	1.14395	1.13759	1.14221	1.12654	1.11591	1.11799	1.11554	1.10795	1.09283	1.08902	1.08834	1.08557	1.07096	1.07283	1.06378	1.06078	1.04999	1.04555	1.03474	1.04117	1.03341	1.03864
col_iaa	1.02434	1.00914	1.00058	1.01787	1.0339	1.03328	1.02519	1.02452	1.01859	1.04108	1.03835	1.05007	1.05749	1.0761	1.07087	1.11818	1.1433	1.14631	1.14995	1.14292	1.12347	1.09478	1.09746	1.10585	1.09689	1.0895	1.1149	1.11018	1.1003	1.09312	1.08592	1.08508	1.09312	1.07472	1.03986	1.06801	1.07547	1.0565	1.05255	1.05461	1.05177
col_iaa	1.03355	1.04148	1.04863	1.05933	1.0645	1.04938	0.995073	1.01134	1.04345	1.08597	1.1081	1.11666	1.12991	1.14853	1.1473	1.14696	1.14532	1.14079	1.13188	1.1244	1.1266	1.11328	1.10578	1.07319	1.05605	1.07997	1.0914	1.10131	1.09412	1.08147	1.08069	1.06681	1.07142	1.07239	1.06004	1.05281	1.05768	1.04837	1.0391	1.0412	1.03392
col_iaa	1.04551	1.05378	1.06203	1.06847	1.0759	1.0744	1.07559	1.07948	1.07077	1.0766	1.08956	1.11323	1.12735	1.14444	1.16204	1.17207	1.16209	1.14575	1.15946	1.1709	1.16865	1.16511	1.15868	1.15969	1.14435	1.13448	1.13417	1.13731	1.14038	1.14001	1.12971	1.12342	1.11762	1.12192	1.10671	1.10735	1.10449	1.10656	1.09917	1.09828	1.09458
col_iaa	1.01081	1.0344	1.03948	1.05277	1.06215	1.06121	1.07773	1.08364	1.08584	1.09298	1.1215	1.13745	1.1524	1.15302	1.17016	1.16967	1.1588	1.15273	1.14352	1.14225	1.13936	1.12744	1.11917	1.11588	1.09412	1.08872	1.08586	1.08531	1.07907	1.07686	1.07806	1.06588	1.06752	1.06139	1.04919	1.05288	1.04455	1.04674	1.04381	1.04066	1.03041
col_iaa	1.05039	1.05147	1.04577	1.04761	1.05078	1.0618	1.06677	1.05923	1.07707	1.08991	1.09722	1.10062	1.07949	1.08715	1.09228	1.08685	1.0899	1.08401	1.07578	1.081	1.08248	1.0785	1.08459	1.0713	1.06865	1.06452	1.05896	1.05408	1.05993	1.06012	1.06161	1.07562	1.06541	1.05683	1.06825	1.05775	1.05955	1.06606	1.05457	1.05252	1.05319
col_iaa	0.999212	0.995719	1.00987	1.00791	1.01851	1.02631	1.03075	1.04105	1.0441	1.05348	1.06313	1.07276	1.08041	1.09408	1.11098	1.12528	1.1317	1.13208	1.11838	1.10446	1.09002	1.06665	1.0558	1.04236	1.03857	1.01562	1.00612	0.995655	0.981296	0.974208	0.964903	0.958128	0.953484	0.943103	0.942484	0.926695	0.923994	0.91694	0.906573	0.902887	0.904466
col_iaa	0.99327	0.996743	1.00262	1.0135	1.0193	1.0281	1.04045	1.04119	1.04952	1.05466	1.06747	1.07209	1.08641	1.09709	1.11478	1.12449	1.14085	1.15163	1.14938	1.13305	1.10945	1.10658	1.09078	1.06535	1.04516	1.03621	1.00611	0.988774	0.980031	0.978631	0.958975	0.945209	0.932017	0.908901	0.902567	0.909561	0.89372	0.889689	0.888897	0.888682	0.884113
col_iaa	0.982725	0.988244	0.995882	0.995372	1.00427	1.01214	1.01847	1.02855	1.02842	1.02813	1.01265	0.984856	1.01664	1.03719	1.07178	1.09716	1.12221	1.13368	1.14267	1.14345	1.13804	1.1315	1.10949	1.09004	1.07846	1.07363	1.05516	1.04249	1.04621	1.03178	1.01552	0.994735	0.98854	0.973444	0.963056	0.952345	0.953438	0.944463	0.949885	0.93981	0.928488
col_iaa	0.98091	0.987206	0.997429	1.00597	1.00392	1.01256	1.0173	0.997315	0.999931	1.01256	1.01821	1.01251	1.02452	1.04688	1.06578	1.07656	1.07866	1.08284	1.09359	1.09019	1.08654	1.07656	1.06369	1.04614	1.04252	1.02495	1.00489	0.988355	0.973675	0.973061	0.973975	0.962254	0.958511	0.949366	0.947096	0.933009	0.925078	0.928284	0.917276	0.916689	0.909691
col_iaa	0.980312	0.992253	0.995733	1.00844	1.01223	1.02629	1.03576	1.03719	1.03602	1.04318	1.04314	1.0559	1.06437	1.06571	1.05409	1.04836	1.09473	1.10187	1.11044	1.11277	1.10728	1.09707	1.07987	1.08895	1.08861	1.08095	1.06265	1.04841	1.03312	1.01174	1.00767	1.00731	0.994112	0.980393	0.972212	0.958086	0.947831	0.955449	0.947417	0.931838	0.931192
col_iaa	0.960713	0.930245	0.920253	0.947516	0.96818	0.972292	0.972438	0.978159	0.972716	0.978468	0.980299	0.974756	0.96983	0.970761	0.972168	0.976073	0.975177	0.963195	0.955706	0.956688	0.946534	0.934817	0.918163	0.910459	0.902505	0.891661	0.879871	0.866564	0.862816	0.852985	0.846583	0.844781	0.833726	0.821672	0.823662	0.825338	0.817823	0.817631	0.828263	0.827834	0.823501
col_iaa	0.981709	0.988106	0.989896	0.984914	0.976047	0.971325	0.985897	1.0101	1.02747	1.03433	1.0393	1.04669	1.05276	1.06587	1.08505	1.09262	1.09701	1.08819	1.08251	1.07644	1.06951	1.05143	1.04035	1.02839	1.01627	1.01205	0.989485	0.977044	0.969499	0.952686	0.942404	0.921645	0.919382	0.897659	0.886794	0.885065	0.870899	0.866931	0.866168	0.86838	0.865366
col_iaa	1.15043	1.16133	1.17	1.18539	1.18225	1.17746	1.19166	1.2023	1.21065	1.21805	1.23983	1.2547	1.26256	1.27378	1.29784	1.32118	1.32885	1.34522	1.3576	1.36214	1.3733	1.38242	1.38671	1.33641	1.34037	1.34784	1.32401	1.30913	1.28895	1.27674	1.27075	1.25018	1.22709	1.22118	1.22579	1.21505	1.20098	1.19156	1.1829	1.18313	1.17095
col_iaa	1.13743	1.13813	1.16532	1.18348	1.19216	1.21764	1.21781	1.2199	1.24209	1.24045	1.24332	1.23137	1.23917	1.24943	1.28184	1.29878	1.31884	1.31712	1.33127	1.35529	1.37911	1.38019	1.35757	1.37471	1.37265	1.35089	1.32901	1.33498	1.29431	1.27575	1.27093	1.25984	1.25733	1.25377	1.23417	1.21798	1.2235	1.21105	1.19016	1.18514	1.18187
col_iaa	1.12703	1.14018	1.14278	1.1467	1.16243	1.16613	1.174	1.18176	1.20293	1.20885	1.21769	1.23325	1.25857	1.27258	1.28944	1.31881	1.3368	1.35005	1.32373	1.31484	1.33571	1.32793	1.32873	1.32781	1.30716	1.30056	1.29407	1.27507	1.25288	1.24009	1.22708	1.20847	1.21391	1.21236	1.19137	1.18301	1.18587	1.17085	1.15366	1.14735	1.15203
col_iaa	1.14218	1.14789	1.16082	1.16818	1.16872	1.17061	1.17981	1.18661	1.20812	1.21642	1.20315	1.12468	1.1568	1.2733	1.3136	1.3141	1.32397	1.33509	1.33677	1.34374	1.32617	1.3204	1.30145	1.28008	1.2745	1.26429	1.25456	1.24286	1.22068	1.20328	1.18559	1.16728	1.15444	1.13481	1.1459	1.13546	1.11024	1.08843	1.08044	1.08719	1.09776
col_iaa	1.12986	1.07005	1.06493	1.10339	1.10689	1.13731	1.1657	1.1939	1.1925	1.20288	1.21789	1.2363	1.2602	1.2705	1.27642	1.29025	1.30922	1.33141	1.33944	1.34417	1.34572	1.35291	1.35295	1.31205	1.29521	1.28412	1.27997	1.27606	1.25919	1.23172	1.19488	1.18664	1.1841	1.14864	1.13797	1.13429	1.11953	1.10509	1.09446	1.1086	1.10146
col_iaa	1.12074	1.11693	1.1158	1.14615	1.15753	1.15092	1.16744	1.17853	1.17506	1.20069	1.18902	1.19846	1.21763	1.24153	1.25777	1.30562	1.34776	1.35652	1.35967	1.37189	1.36096	1.34214	1.27121	1.18482	1.2369	1.2897	1.25671	1.2404	1.2294	1.24239	1.21625	1.19808	1.18356	1.16437	1.16287	1.15812	1.1303	1.10826	1.09115	1.07984	1.07437
col_iaa	1.13856	1.15329	1.15671	1.15331	1.13092	1.16562	1.19749	1.20092	1.20452	1.21072	1.19409	1.23213	1.24731	1.2658	1.28245	1.29115	1.30459	1.31958	1.32839	1.31129	1.31384	1.31783	1.29667	1.27199	1.26167	1.24432	1.21901	1.19422	1.18761	1.16184	1.147	1.1387	1.14112	1.13873	1.12161	1.11115	1.0943	1.09528	1.08092	1.06141	1.06264
col_iaa	1.13796	1.15538	1.16317	1.15558	1.17528	1.19604	1.20275	1.2175	1.19485	1.20645	1.21919	1.23587	1.26655	1.28366	1.30185	1.30551	1.30794	1.32868	1.32061	1.31678	1.29319	1.27294	1.26478	1.24935	1.24162	1.23328	1.2387	1.21159	1.2012	1.19127	1.18642	1.18031	1.18531	1.17957	1.16341	1.12986	1.1208	1.12063	1.11957	1.11902	1.11819
aux_cm	0.956417	0.953671	0.947297	0.949239	0.942585	0.925858	0.914974	0.918339	0.905769	0.897129	0.898699	0.886691	0.885097	0.876443	0.873336	0.865919	0.869343	0.862359	0.862318	0.856349	0.852104	0.858946	0.858731	0.854407	0.850583	0.844033	0.847816	0.840035	0.838121	0.842128	0.840588	0.836041	0.836583	0.841146	0.884627	0.895294	0.890845	0.898421	0.898304	0.899162	0.898098
aux_cm	0.94661	0.964912	0.963125	0.972124	0.96838	0.961702	0.970003	0.967062	0.959388	0.955458	0.949229	0.948293	0.940317	0.929081	0.921028	0.905898	0.903798	0.898022	0.92352	0.92987			0.916558	0.909314	0.913095	0.909955	0.892943	0.904121	0.89894	0.896903	0.891982	0.896093	0.899129	0.885305	0.899638	0.905783	0.906872	0.908636	0.911784	0.911473	0.911812
aux_cm	0.988751	0.980256	0.981887	0.974648	0.969226	0.963822	0.946401	0.939332	0.930176	0.928543	0.922102	0.917258	0.910223	0.892361	0.878504	0.870242	0.859535	0.857298	0.848841	0.848413	0.842394	0.834775	0.836462	0.835374	0.835538	0.831932	0.83182	0.826375	0.826381	0.822141	0.830603	0.834571	0.824488	0.835785	0.835741	0.832656	0.841417	0.844094	0.84609	0.847469	0.841144
aux_cm	0.949466	0.945604	0.949116	0.945431	0.939419	0.936645	0.923945	0.924109	0.912372	0.909482	0.902346	0.899127	0.895168	0.889043	0.88985	0.888834	0.882672	0.882562	0.87634	0.879599	0.882068	0.880826	0.882934	0.881761	0.878803	0.872069	0.876334	0.8709	0.865386	0.865537	0.86552	0.865047	0.861543	0.868643	0.870975	0.875842	0.87207	0.878152	0.885004	0.888946	0.881823
aux_cm	0.885912	0.887498	0.874436	0.869918	0.860705	0.852325	0.845003	0.83359	0.82131	0.818612	0.816153	0.813828	0.81095	0.807743	0.809589	0.811901	0.818737	0.819009	0.822404	0.819105	0.818126	0.824721	0.817225	0.824885	0.822284	0.821624	0.822815	0.821408	0.817465	0.814136	0.814173	0.812711	0.808103	0.812866	0.8172	0.819103	0.825979	0.833532	0.829144	0.827988	0.833446
aux_cm	0.877119	0.877075	0.868102	0.866273	0.861215	0.851367	0.849193	0.843498	0.830001	0.820434	0.807101	0.805427	0.798042	0.787748	0.78484	0.773113	0.772346	0.768532	0.765386	0.767006	0.776596	0.773977	0.776574	0.781879	0.783796	0.789928	0.795517	0.803284	0.810374	0.811579	0.822072	0.823221	0.828365	0.822407	0.825162	0.82773	0.825443	0.831385	0.832134	0.830189	0.827097
aux_cm	0.858272	0.85067	0.846607	0.837346	0.829849	0.822028	0.821354	0.822775	0.820971	0.81209	0.807468	0.80759	0.808531	0.804293	0.802555	0.792043	0.794215	0.790388	0.791751	0.786782	0.791521	0.794537	0.787775	0.791089	0.788914	0.788499	0.792826	0.794735	0.796209	0.799741	0.79912	0.795957	0.801288	0.802421	0.800648	0.800546	0.805433	0.805893	0.810175	0.813894	0.803508
aux_cm	0.851389	0.842146	0.833627	0.832699	0.824134	0.818703	0.80879	0.803322	0.795989	0.786901	0.785454	0.785857	0.776907	0.772926	0.772346	0.76731	0.764333	0.764022	0.764896	0.757006	0.757795	0.765028	0.767597	0.760752	0.757855	0.768655	0.775013	0.77495	0.777191	0.778581	0.77991	0.77923	0.783476	0.783618	0.791772	0.794203	0.792899	0.789734	0.791487	0.793561	0.786863
aux_cm	0.953029	0.962567	0.956668	0.964603	0.959885	0.952494	0.940484	0.939498	0.934124	0.912364	0.889807	0.93303	0.940607	0.941988	0.941943	0.942746	0.94686	0.949465	0.952891	0.945436	0.944033	0.941777	0.929721	0.927327	0.926224	0.92657	0.918493	0.926977	0.919667	0.911078	0.912332	0.915713	0.908525	0.904764	0.906851	0.896381	0.890823	0.884521	0.881333	0.881453	0.876489
aux_cm	0.948749	0.966838	0.962164	0.975117	0.969303	0.964455	0.954695	0.95052	0.945113	0.940233	0.947156	0.946038	0.946996	0.948295	0.95785	0.95055	0.961194	0.950931	0.953612	0.959462	0.953048	0.941353	0.939797	0.945439	0.940779	0.931103	0.928092	0.939467	0.941334	0.936571	0.933065	0.922117	0.929712	0.922084	0.913681	0.9146	0.904861	0.903054	0.897953	0.901562	0.90523
aux_cm	0.948527	0.943351	0.951592	0.940664	0.932113	0.933778	0.919521	0.924189	0.932069	0.927171	0.925134	0.928693	0.934252	0.925155	0.925314	0.925989	0.91797	0.906037	0.910132	0.898802	0.901624	0.901453	0.872953	0.854308	0.877026	0.882564	0.882042	0.886541	0.874403	0.87782	0.87801	0.885595	0.89293	0.897938	0.899128	0.888545	0.891586	0.887847	0.893067	0.897085	0.900301
aux_cm	0.968006	0.96451	0.963536	0.954122	0.954886	0.954372	0.957468	0.957433	0.928282	0.953388	0.962068	0.958985	0.947899	0.934277	0.932066	0.940084	0.951183	0.944336	0.922204	0.86654	0.947271	0.941235	0.940804	0.944386	0.953645	0.957359	0.946845	0.933469	0.916898	0.908859	0.925572	0.918179	0.924886	0.933464	0.946852	0.935323	0.92855
aux_iaa	0.966797	0.96838	0.971268	0.962666	0.971912	0.957077	0.955058	0.964213	0.97298	0.977492	0.985152	0.988512	0.98844	0.990834	0.995266	0.992834	0.995768	0.997622	1.00036	1.00297	1.00648	1.01099	1.01125	1.02166	1.02414	1.02119	1.02736	1.03002	1.01779	1.02139	1.01729	1.02028	1.01933	1.01923	1.01656	1.0109	1.00933	1.00277	1.01134	1.00852	1.00518
aux_iaa	0.971935	0.973234	0.967172	0.971619	0.97551	0.970433	0.966569	0.966144	0.967902	0.969465	0.967964	0.961876	0.970524	0.973105	0.978014	0.984189	0.977575	0.979792	0.973718	0.981756	0.986696	0.98046	0.986577	0.992896	0.990005	0.996972	1.00042	0.994818	0.994741	0.992158	0.992278	0.992624	0.984301	0.982202	0.980179	0.986236	0.993324	0.987806	0.99213	0.985333	0.986078
aux_iaa	0.995302	0.993924	0.99283	1.00161	1.00535	1.00949	1.01414	1.01126	1.00461	1.01313	1.01929	1.01979	1.02565	1.01453	1.02227	1.02232	1.01574	1.01543	1.01655	1.01769	1.00836	1.00947	1.01358	1.00271	1.00212	0.993317	0.990967	0.986807	0.971839	0.974056	0.971831	0.965451	0.966286	0.969707	0.956383
aux_iaa	1.0168	1.02481	1.02129	1.02131	1.02712	1.01838	1.02637	1.03119	1.02815	1.03193	1.03674	1.03926	1.03905	1.04377	1.04311	1.04157	1.0471	1.05384	1.04405	1.03953	1.04626	1.04661	1.04136	1.03502	1.03788	1.04626	1.0437	1.03296	1.03347	1.03313	1.02579	1.02489	1.01659	1.01884	1.00814	1.01034	0.992458	0.986212	1.00691	1.01288	1.01152
aux_iaa	0.958054	0.956264	0.95681	0.962138	0.955419	0.955759	0.952648	0.946444	0.943355	0.933587	0.930516	0.931124	0.926254	0.92394	0.924157	0.920918	0.917383	0.909301	0.91172	0.906218	0.90356	0.90674	0.914443	0.907729	0.909537	0.902284	0.894727	0.888893	0.890242	0.89056	0.894789	0.885529	0.881807	0.882784	0.882275	0.873824	0.869453	0.868561	0.868672	0.87	0.880374
aux_iaa	0.930104	0.94505	0.955061	0.962412	0.959342	0.96747	0.975649	0.973911	0.962983	0.972798	0.969412	0.967929	0.968057	0.95781	0.958127	0.953922	0.945429	0.939881	0.93559	0.938476	0.933591	0.924147	0.926581	0.91709	0.912135	0.909468	0.903701	0.905148	0.893843	0.892927	0.881162	0.876824	0.87249	0.865274	0.864251	0.857945	0.860736	0.855273	0.849617	0.847883	0.849922
aux_iaa	0.922645	0.930629	0.933427	0.931992	0.928696	0.919597	0.923081	0.916055	0.911962	0.914828	0.908406	0.903264	0.898816	0.891815	0.892151	0.888418	0.891394	0.890606	0.889775	0.891628	0.891549	0.892094	0.892172	0.884798	0.884566	0.877433	0.877421	0.883238	0.882896	0.88091	0.869391	0.868533	0.864965	0.863423	0.85947	0.859722	0.864212	0.861297	0.861236	0.852804	0.858956
aux_iaa	0.884241	0.885234	0.877153	0.869083	0.864954	0.850592	0.842694	0.831338	0.823281	0.81688	0.814182	0.80723	0.796414	0.791125	0.791069	0.792358	0.790387	0.800303	0.796339	0.793915	0.796653	0.796217	0.797698	0.79632	0.801175	0.798885	0.795478	0.801961	0.801616	0.799908	0.805624	0.802139	0.805402	0.807985	0.811576	0.810707	0.816435	0.827036	0.820869	0.827282	0.834268
aux_iaa	0.869193	0.866658	0.868739	0.868169	0.85916	0.860889	0.860752	0.85832	0.856932	0.854329	0.840176	0.835743	0.829138	0.822673	0.823728	0.822918	0.818217	0.822729	0.818316	0.815149	0.816262	0.817108	0.817783	0.811245	0.813225	0.813657	0.815399	0.818897	0.824984	0.837408	0.851567	0.852048	0.855825	0.857846	0.877762	0.872005	0.871153	0.888661	0.894779	0.895848	0.900596
aux_iaa	1.03072	1.04354	1.0337	1.02359	1.02133	1.01933	1.02622	1.0339	1.03289	1.02515	1.03799	1.04639	1.05331	1.0638	1.06173	1.05103	1.05452	1.04566	1.04009	1.03924	1.04626	1.04398	1.05555	1.04687	1.02991	1.02553	1.0112	0.996112	0.991013	0.980232	0.975123	0.999438	1.00805	1.00452	0.988158	0.993806	0.999792	1.01377	1.01772	1.01021	1.00663
aux_iaa	1.06972	1.06708	1.07113	1.07887	1.10075	1.09539	1.08745	1.09301	1.09002	1.0812	1.0828	1.09039	1.08856	1.08985	1.0998	1.09518	1.11106	1.109	1.10419	1.08944	1.09139	1.09404	1.11589	1.11202	1.09987	1.09729	1.10284	1.09334	1.08126	1.06894	1.063	1.04892	1.05274	1.04402	1.04323	1.05256	1.06363	1.04318	1.03352	1.0262	1.01637
aux_iaa	1.00878	1.00765	0.997476	0.995285	0.995467	1.00761	1.00447	0.992899	1.00848	1.0195	1.01595	1.01211	1.0161	1.01633	1.02284	1.03787	1.02972	1.0244	1.03007	1.02141	1.01618	1.01706	1.02543	1.02763	1.03013	1.03197	1.02615	1.01656	1.0001	0.995073	1.00077	1.00558	1.00028	1.00314	0.999205	0.991911	0.983018	0.986471	0.986053	0.995351	0.99902
aux_iaa	1.05186	1.06732	1.06165	1.04765	1.03514	1.03187	1.03231	1.01905	1.01442	1.01067	1.01262	1.00648	1.0152	1.01425	1.00905	1.00602	1.00579	1.00149	1.00294	1.00124	0.996256	1.011	1.01287	1.01384	1.01235	1.02042	1.02459	1.0313	1.0313	1.02594	1.03686	1.02825	1.01577	1.01829	1.01298	1.00255	1.00555	0.996827	0.99804	1.00148	1.00025
pin_cm	1.0069	1.00927	1.0172	1.02004	1.02784	1.03081	1.02534	1.0295	1.02226	1.02314	1.01721	1.0143	1.00415	0.990012	0.986803	0.980262	0.974891	0.960134	0.942951	0.925439	0.922104	0.916321	0.912482	0.905903	0.90354	0.889051	0.888636	0.885365	0.87976	0.875523	0.868111	0.866808	0.861834	0.856531	0.850199	0.849686	0.857763	0.844682	0.848509	0.853202	0.850327
pin_cm	0.990169	0.992101	0.996803	1.00258	1.00821	1.01617	1.00892	0.999922	0.998732	0.999091	0.987529	0.974222	0.969106	0.961169	0.950727	0.941982	0.930383	0.911707	0.91392	0.90735	0.886424	0.88298	0.883764	0.876374	0.876907	0.871369	0.870912	0.871038	0.858703	0.85887	0.847772	0.844701	0.846466	0.837455	0.833634	0.83846	0.844438	0.847042	0.852647	0.852758	0.858317
pin_cm	1.00496	1.01441	1.01837	1.02347	1.00533	0.98742	0.985461	0.99031	0.987913	0.992341	0.987949	0.979284	0.974175	0.970155	0.962181	0.950661	0.945149	0.930319	0.928323	0.918465	0.907776	0.906541	0.906835	0.900049	0.897105	0.894403	0.888925	0.891012	0.886599	0.887438	0.889611	0.885281	0.88281	0.873577	0.872814	0.875024	0.856134	0.858567	0.865268	0.862886	0.863229
pin_cm	0.992213	0.994517	1.00171	0.999027	0.99887	0.993906	0.978094	0.986023	0.977319	0.973975	0.965136	0.960753	0.949027	0.940809	0.930728	0.923833	0.919798	0.901657	0.891802	0.887174	0.87999	0.880599	0.877746	0.877785	0.878825	0.877377	0.875404	0.873682	0.858935	0.850208	0.846895	0.850523	0.843735	0.841039	0.842008	0.839818	0.83507	0.834217	0.839529	0.839641	0.84272
pin_cm	0.924518	0.933638	0.932852	0.938803	0.940238	0.94107	0.938449	0.931067	0.9292	0.927375	0.919245	0.907286	0.900094	0.885172	0.872204	0.865817	0.855957	0.857714	0.854015	0.840792	0.825805	0.834486	0.84096	0.841161	0.843153	0.845667	0.834187	0.839489	0.839322	0.831596	0.832821	0.828013	0.826352	0.829956	0.832127	0.833443	0.828848	0.834547	0.833608	0.823119	0.826222
pin_cm	0.928951	0.92904	0.931692	0.934583	0.94026	0.934759	0.933884	0.934496	0.933554	0.926652	0.920895	0.916767	0.914778	0.908359	0.892974	0.883807	0.869919	0.859122	0.844428	0.837599	0.837031	0.836882	0.83046	0.827767	0.829622	0.823858	0.820362	0.818084	0.814885	0.814078	0.821847	0.821835	0.820325	0.815754	0.820567	0.820204	0.813019	0.81159	0.811143	0.813363	0.81988
pin_cm	0.907002	0.910616	0.899994	0.896766	0.884199	0.890583	0.891728	0.900311	0.897412	0.895941	0.881436	0.869484	0.86578	0.861205	0.848055	0.837253	0.829161	0.817744	0.815726	0.817596	0.806787	0.805724	0.806983	0.809977	0.805723	0.806096	0.802528	0.792314	0.796571	0.791982	0.788062	0.795691	0.795624	0.795597	0.796798	0.801197	0.799416	0.804806	0.804443	0.809706	0.814906
pin_cm	1.01884	1.01065	1.01341	1.01259	1.01331	1.01056	0.993874	0.98623	0.980387	0.971108	0.966275	0.958936	0.957183	0.943913	0.934699	0.925876	0.92511	0.912436	0.905456	0.904608	0.901093	0.896167	0.891712	0.906868	0.899797	0.900145	0.899948	0.881786	0.883888	0.880707	0.881718	0.882922	0.870947	0.874987	0.868956	0.867882	0.875245	0.886562	0.884538	0.886145	0.896878
pin_cm	0.940959	0.944059	0.944807	0.940034	0.94196	0.940638	0.927501	0.934587	0.931491	0.92436	0.919038	0.915663	0.914679	0.917652	0.913219	0.912768	0.921667	0.910771	0.913099	0.913447	0.91677	0.923576	0.925682	0.923652	0.921791	0.925334	0.932416	0.922929	0.924778	0.926895	0.925549	0.919432	0.9168	0.912761	0.913983	0.93324	0.925427	0.917112	0.919116	0.910332
pin_cm	1.02785	1.03748	1.0358	1.04796	1.05335	1.06964	1.07078	1.05021	1.03167	1.02324	1.01314	1.01043	0.992884	0.974779	0.962916	0.964172	0.95113	0.942021	0.926537	0.923312	0.921854	0.925186	0.914671	0.915931	0.911078	0.903999	0.895393	0.903906	0.905589	0.900573	0.891971	0.889608	0.883126	0.88081	0.88167	0.886693	0.883686	0.891353	0.893655	0.890523	0.886864
pin_cm	1.01502	1.04032	1.03997	1.03556	1.06673	1.05925	1.05606	1.05088	1.04763	1.03281	1.01131	0.997017	0.983114	0.96259	0.945001	0.934082	0.925177	0.912583	0.902004	0.900035	0.892151	0.879273	0.878324	0.883686	0.88069	0.879347	0.883059	0.876543	0.87451	0.879376	0.886598	0.88576	0.891737	0.893943	0.886507	0.888007	0.887873	0.889342	0.895993	0.900965	0.891201
pin_cm	1.02665	1.02619	1.04189	1.04875	1.05382	1.05282	1.04802	1.02767	1.02761	1.02393	1.02545	1.01662	0.99993	0.983888	0.970799	0.955421	0.934866	0.940265	0.948275	0.927662	0.926181	0.92899	0.920853	0.919542	0.916928	0.914597	0.902188	0.906094	0.902208	0.891393	0.891508	0.900571	0.896887	0.888107	0.891789	0.897736	0.889644	0.886953	0.885717	0.892134	0.892325
pin_cm	0.984685	1.00306	0.988442	0.984572	0.98563	0.984139	0.978265	0.96736	0.967985	0.957559	0.957255	0.952994	0.954944	0.961091	0.952859	0.948804	0.9435	0.93957	0.929511	0.92929	0.927477	0.916387	0.91958	0.908765	0.904089	0.905072	0.90479	0.904563	0.900419	0.906613	0.906451	0.89651	0.894724	0.884539	0.871345	0.876935	0.870473	0.866981	0.866784	0.869989	0.871773
pin_iaa	1.02192	1.03575	1.04537	1.03996	1.04508	1.0626	1.08254	1.08507	1.09495	1.10245	1.10905	1.12363	1.12604	1.11853	1.11829	1.1128	1.10283	1.09625	1.08636	1.0786	1.07473	1.05992	1.04985	1.057	1.04848	1.03043	1.02222	1.01658	1.01371	1.01231	1.00107	1.00328	0.993586	0.994692	0.985732	0.974391	0.97287	0.966416	0.958938	0.954018	0.962553
pin_iaa	1.03575	1.04106	1.04824	1.05901	1.06415	1.07242	1.08714	1.10012	1.1081	1.11446	1.12297	1.13669	1.1413	1.15218	1.15926	1.1597	1.1682	1.1663	1.15325	1.14408	1.14242	1.13688	1.13825	1.13876	1.11793	1.12155	1.12036	1.11563	1.11188	1.10111	1.10576	1.09305	1.08446	1.07809	1.07891	1.08933	1.08781	1.0805	1.0801	1.07443	1.07193
pin_iaa	1.03323	1.04814	1.06264	1.05958	1.07605	1.08221	1.09545	1.11269	1.12941	1.14343	1.14705	1.1573	1.15849	1.16413	1.16515	1.17164	1.16157	1.15675	1.15104	1.13595	1.13673	1.12759	1.11491	1.11455	1.10864	1.08923	1.08795	1.0838	1.0746	1.06425	1.05617	1.04987	1.0477	1.03796	1.02177	1.01741	1.01655	1.00376	0.996578	0.99292	0.984199
pin_iaa	1.02282	1.03455	1.02907	1.02902	1.06348	1.07902	1.08317	1.09749	1.11007	1.11334	1.12521	1.13234	1.12973	1.13973	1.13719	1.1413	1.13397	1.12355	1.11658	1.10563	1.10971	1.11277	1.09412	1.09069	1.09214	1.08325	1.07391	1.06931	1.06197	1.06343	1.05839	1.05069	1.04328	1.04986	1.04382	1.02711	1.02835	1.0281	1.02041	1.01167	1.00382
pin_iaa	1.0495	1.06542	1.06881	1.06884	1.07631	1.10013	1.11375	1.10881	1.11136	1.1203	1.12955	1.13169	1.13699	1.12267	1.13335	1.11322	1.11068	1.09872	1.08875	1.08341	1.07213	1.07628	1.07267	1.06139	1.05032	1.0103	0.952241	1.01773	1.02507	1.01216	1.00609	1.00728	0.998229	0.990973	0.990019	0.988405	0.979559	0.971359	0.961032	0.957204	0.9564
pin_iaa	1.01124	1.01333	1.02503	1.01477	1.04248	1.05443	1.0795	1.08824	1.09271	1.10724	1.10869	1.11421	1.12499	1.12691	1.12464	1.12801	1.12177	1.10641	1.09527	1.0837	1.08403	1.07871	1.06773	1.06297	1.05575	1.03802	1.0324	1.02022	1.0133	1.00136	0.990809	0.987571	0.984406	0.979308	0.97804	0.965567	0.95326	0.948263	0.944772	0.94274	0.943386
pin_iaa	1.02346	1.03603	1.05239	1.05383	1.0596	1.06772	1.07708	1.07687	1.08454	1.09044	1.09807	1.11265	1.11407	1.12756	1.12283	1.12755	1.11669	1.11167	1.0885	1.08731	1.07515	1.05939	1.04943	1.04468	1.03271	1.02178	1.01732	1.01058	1.01058	1.00163	0.996786	0.990715	0.985716	0.988188	0.979692	0.982252	0.975237	0.963856	0.964647	0.969261	0.971892
pin_iaa	1.01828	1.03562	1.04939	1.05808	1.06045	1.08164	1.10755	1.11418	1.12422	1.12093	1.11695	1.13	1.12743	1.13168	1.13299	1.12375	1.10175	1.09662	1.07838	1.07527	1.06473	1.04889	1.04116	1.03231	1.02622	1.00686	0.993389	0.991577	0.985703	0.980852	0.98294	0.978494	0.978737	0.968667	0.966841	0.960451	0.954804	0.946745	0.947521	0.941322	0.932012
pin_iaa	0.9973	1.00812	1.008	1.03071	1.04041	1.03433	1.05074	1.05004	1.05381	1.05942	1.05923	1.05372	1.04952	1.04913	1.03347	1.03736	1.026	1.01865	1.00551	1.00707	0.998983	0.997837	0.993614	0.981093	0.978542	0.985669	0.987377	0.987861	0.980589	0.971807	0.973509	0.971058	0.965516	0.970391	0.961058	0.970719	0.963867	0.965074	0.957173	0.956029	0.956961
pin_iaa	1.1361	1.16798	1.16022	1.19188	1.21596	1.19624	1.19763	1.19817	1.21201	1.21871	1.21666	1.19637	1.19068	1.15092	1.14953	1.14727	1.15774	1.15357	1.13847	1.12406	1.12124	1.12172	1.118	1.10593	1.10112	1.08472	1.08004	1.07328	1.06037	1.04595	1.04708	1.04017	1.0411	1.03283	1.021	1.0107	0.996901	0.995944	0.995888	0.990211	0.979228
pin_iaa	1.22543	1.25585	1.25422	1.29256	1.3056	1.21805	1.21302	1.19324	1.31545	1.34552	1.35865	1.34196	1.34707	1.32044	1.28176	1.26586	1.25376	1.22474	1.20896	1.18555	1.1681	1.15829	1.14877	1.14179	1.11597	1.10858	1.07883	1.07932	1.05366	1.05077	1.06025	1.05758	1.05425	1.04134	1.03964	1.04189	1.02573
pin_iaa	1.19084	1.12242	1.11191	1.11478	1.10328	1.1138	1.10286	1.09665	1.0902	1.08888	1.08639	1.0841	1.08334	1.07026	1.06806	1.04651	1.04489	1.0104	1.05921	1.05452	1.04144	1.03818	1.04586	1.05312	1.03516	1.03467	1.03994	1.03904	1.03844	1.03743	1.03653	1.02609	1.0248	1.03491	1.01759	1.01718	1.02242	1.00636	0.999379	0.990743
pin_iaa	1.12728	1.16054	1.19069	1.20315	1.21656	1.23021	1.24212	1.24858	1.26174	1.26198	1.25437	1.25109	1.22613	1.2192	1.21644	1.1903	1.19029	1.17908	1.18262	1.18317	1.18307	1.17603	1.16935	1.15444	1.15214	1.1513	1.13985	1.13627	1.12422	1.1123	1.1207	1.11791	1.1225	1.10858	1.08926	1.09561	1.10768	1.09967
auxpin_cm	0.998244	1.00271	1.0054	0.998038	1.00392	1.00043	0.998258	0.996608	0.984946	0.989277	0.968274	0.960784	0.951406	0.932695	0.926888	0.90632	0.900947	0.895149	0.886273	0.875041	0.863649	0.859337	0.856088	0.849758	0.840404	0.84398	0.834507	0.84336	0.83736	0.843898	0.861935	0.865907	0.863126	0.861792	0.872917	0.873167	0.871261	0.877946	0.891875	0.897967	0.894377
auxpin_cm	0.964654	0.966559	0.954793	0.939092	0.956519	0.960466	0.950889	0.945608	0.941174	0.940432	0.936936	0.930865	0.925894	0.917968	0.914907	0.917645	0.910694	0.904994	0.894607	0.890896	0.889244	0.891539	0.882007	0.869619	0.871195	0.864441	0.857377	0.848665	0.841408	0.836806	0.834567	0.833634	0.83661	0.832268	0.825907	0.823669	0.827604	0.822302	0.845099	0.84709	0.842212
auxpin_cm	0.925991	0.925322	0.921996	0.922853	0.920414	0.910194	0.901269	0.895857	0.900709	0.8917	0.889877	0.88115	0.878324	0.87755	0.873949	0.869131	0.862805	0.860535	0.859762	0.860455	0.856302	0.851637	0.854375	0.845681	0.834631	0.827336	0.821518	0.824138	0.82653	0.824129	0.826494	0.826834	0.828202	0.831435	0.832944	0.835931	0.833458	0.830708	0.831612	0.829034	0.83189
auxpin_cm	0.93944	0.927414	0.914284	0.918227	0.901734	0.907763	0.909331	0.895558	0.891942	0.879546	0.884919	0.883267	0.885211	0.875182	0.872211	0.86084	0.870724	0.876863	0.87892	0.875293	0.872575	0.875784	0.869822	0.865903	0.860109	0.871448	0.873987	0.877662	0.886742	0.88437	0.879713	0.879621	0.877275	0.87577	0.869573	0.869965	0.868147	0.866325	0.87915	0.885845	0.879878
auxpin_cm	0.862139	0.868398	0.871754	0.870858	0.874428	0.870419	0.86948	0.860483	0.856413	0.856381	0.845145	0.853882	0.849794	0.839738	0.835233	0.827334	0.827338	0.818121	0.8101	0.806602	0.808838	0.804343	0.794891	0.791676	0.794104	0.787695	0.784764	0.785303	0.79127	0.795539
auxpin_cm	0.839959	0.837639	0.832821	0.836604	0.830654	0.829081	0.832234	0.823585	0.821166	0.818014	0.811059	0.804456	0.790706	0.793421	0.795077	0.796812	0.794282	0.791603	0.789029	0.786422	0.79054	0.787775	0.765514	0.785855	0.787648	0.783907	0.780943	0.786108	0.790754	0.795443	0.790263	0.786556	0.794348	0.804824	0.806315	0.81339	0.824858	0.826903	0.82257	0.822002	0.830671
auxpin_cm	0.881194	0.882665	0.886052	0.883728	0.875644	0.884746	0.878532	0.872504	0.872612	0.864843	0.860593	0.855271	0.850613	0.841733	0.830763	0.819676	0.810998	0.80474	0.799541	0.793271	0.787962	0.788935	0.79048	0.794379	0.79904	0.80043	0.800448	0.80297	0.801516	0.808067	0.805839	0.807033	0.809574	0.809498	0.808771	0.806	0.809393	0.81186	0.801522	0.805481	0.800617
auxpin_cm	0.968875	0.965386	0.96	0.952076	0.950553	0.934373	0.928087	0.933493	0.930905	0.926677	0.915692	0.91442	0.922302	0.913967	0.912154	0.921394	0.924804	0.921887	0.919568	0.938326	0.935574	0.924531	0.921892	0.907354	0.90253	0.90286	0.906714	0.90162	0.914956	0.923515								0.927676	0.928671	0.922927	0.91886
auxpin_cm	1.01207	1.03181	1.0313	1.03274	1.02651	1.02144	1.01516	1.01144	1.01215	1.0158	1.00587	1.009	0.989764	0.985168	0.984448	0.967525	0.972683	0.968512	0.964923	0.954965	0.936681	0.908667	0.899002	0.900927	0.896072	0.889064	0.880651	0.882908	0.881614	0.877896	0.874659	0.871086	0.878753	0.87147
auxpin_cm	0.995377	0.986026	0.974226	0.969045	0.979181	0.973016	0.972148	0.955316	0.957775	0.956486	0.951267	0.949398	0.94962	0.954576	0.948866	0.942244	0.936738	0.930714	0.928937	0.915937	0.913438	0.893814	0.890665	0.897626	0.891848	0.890905	0.897238	0.905985	0.901191	0.918584	0.920917	0.91795	0.911123	0.930255	0.928078	0.911037	0.908888	0.916492	0.906001	0.906193
auxpin_cm	0.933435	0.932521	0.921997	0.917585	0.910682	0.896448	0.890003	0.89108	0.886163	0.87748	0.875735	0.871536	0.876536	0.877052	0.87691	0.876565	0.877892	0.875364	0.878559	0.880549	0.892721	0.889929	0.904295	0.906696	0.909083	0.912079	0.922233	0.913015	0.904655	0.899635	0.902155	0.90072	0.896281	0.891443	0.884949	0.893113	0.89236	0.893667	0.905065	0.903295	0.902309
auxpin_cm	0.976254	0.985006	0.979941	0.985216	0.977637	0.968383	0.971617	0.962574	0.951342	0.944919	0.931569	0.923081	0.927999	0.910926	0.897993	0.887165	0.88104	0.879219	0.888503	0.888607	0.890992	0.880243	0.883502	0.882098	0.886864	0.882131	0.869588	0.878752	0.891389	0.895089	0.906346	0.905257	0.898767	0.891577	0.894091
auxpin_iaa	1.02837	1.02518	1.03423	1.03696	1.0348	1.02769	1.02241	1.05151	1.06317	1.06754	1.07782	1.09122	1.09788	1.09321	1.09899	1.10383	1.10074	1.10244	1.0963	1.09262	1.09446	1.09793	1.07536	1.07077	1.06236	1.05558	1.04632	1.03362	1.02842	1.01691	1.01564	1.00654	1.00734	1.00909	0.9922	0.987206	0.982008	0.981095	0.979345	0.969999	0.971207
auxpin_iaa	1.0171	1.02765	1.02047	1.03132	1.03112	1.03296	1.04071	1.03447	1.03846	1.01379	1.05615	1.07969	1.08326	1.08907	1.08379	1.0778	1.08805	1.09221	1.0828	1.0881	1.07754	1.06744	1.08168	1.08502	1.07399	1.06266	1.05982	1.05286	1.03792	1.03771	1.0502	1.0448	1.0491	1.03741	1.03168	1.02471	1.02769	1.02807	1.02793	1.02802	1.02132
auxpin_iaa	0.975745	0.988625	1.01541	1.01214	1.01678	1.03007	1.04288	1.05379	1.06371	1.07545	1.08552	1.08818	1.08913	1.07831	1.07532	1.07591	1.06832	1.05627	1.06757	1.0585	1.05239	1.04771	1.03999	1.04515	1.03708	1.03498	1.03716	1.03464	1.02121	1.0212	1.0179	1.01163	1.01187	1.01293	1.01319	0.99903	1.0004	1.00413	0.995542	0.98732	0.987266
auxpin_iaa	1.00671	1.00492	1.00772	1.00706	1.00354	1.00502	1.01192	1.01704	1.02093	1.01899	1.04171	1.05236	1.05695	1.05906	1.06624	1.07393	1.07508	1.06708	1.05634	1.0553	1.06975	1.06554	1.05665	1.05759	1.05764	1.05598	1.04855	1.05213	1.05021	1.05309	1.04874	1.04622	1.04732	1.03605	1.03306	1.02746	1.02641	1.0265	1.01664	1.00838	1.00875
auxpin_iaa	0.913312	0.919023	0.918932	0.918758	0.917327	0.922932	0.910074	0.913825	0.914499	0.91076	0.914715	0.916294	0.922348	0.915653	0.920077	0.921437	0.914191	0.921587	0.916661	0.912164	0.909354	0.912788	0.908997	0.908027	0.906473	0.908596	0.909276	0.903415	0.899554	0.90038	0.890815	0.892922	0.884866	0.880925	0.878726	0.876474	0.876306	0.879947	0.879018	0.892491	0.885736
auxpin_iaa	0.936223	0.931372	0.923068	0.923043	0.927654	0.921257	0.907989	0.889329	0.884418	0.878367	0.882014	0.880774	0.881164	0.880259	0.879233	0.882112	0.881223	0.877116	0.882641	0.885174	0.885347	0.890231	0.894543	0.891813	0.888953	0.874357	0.888505	0.894928	0.897548	0.894186	0.894032	0.896565	0.894187	0.889893	0.893886	0.893285	0.891636	0.880817	0.869413	0.881308	0.874829
auxpin_iaa	0.937594	0.94086	0.939905	0.935842	0.935307	0.920633	0.927966	0.928398	0.932155	0.933484	0.942202	0.949589	0.953516	0.963902	0.969325	0.976925	0.972709	0.967942	0.960621	0.959823	0.951092	0.948471	0.953672	0.943395	0.943502	0.943712	0.938173	0.932317	0.925849	0.923353	0.917928	0.904124	0.894774	0.896919	0.89885	0.897503	0.88673	0.876027	0.877919	0.87464	0.874589
auxpin_iaa	0.939568	0.940922	0.933722	0.941246	0.931642	0.924565	0.925213	0.918194	0.919921	0.916194	0.920297	0.912103	0.910701	0.90742	0.906452	0.901711	0.900077	0.896317	0.895547	0.895872	0.890022	0.889234	0.879022	0.878067	0.868719	0.87052	0.871108	0.865853	0.865591	0.863254	0.853173	0.846759	0.845028	0.842376	0.8418	0.850388	0.846973	0.846982	0.848152	0.849266	0.84941
auxpin_iaa	1.0028	1.0046	0.999611	0.995402	1.00336	1.00109	0.996562	0.996875	0.988738	0.987604	0.983328	0.981692	0.974934	0.967123	0.963267	0.962733	0.950083	0.943258	0.94575	0.939226	0.938438	0.933232	0.928011	0.927054	0.910997	0.91165	0.914717	0.912437	0.906842	0.902274	0.899514	0.898508	0.890297	0.897215	0.894246	0.886162	0.883571	0.887584	0.885632	0.880035	0.880825
auxpin_iaa	1.04085	1.04134	1.05063	1.04945	1.03867	1.03895	1.03409	1.0184	1.02989	1.0297	1.02797	1.03706	1.04259	1.0398	1.03583	1.03971	1.03954	1.03736	1.03328	1.03214	1.01824	1.01594	1.01509	1.01222	1.01166	1.0033	0.987645	0.992848	1.00234	0.994188	0.990288	0.985933	0.985618	0.980923	0.977739	0.974528	0.976555	0.977098	0.965208	0.962568	0.957639
auxpin_iaa	1.08629	1.10116	1.11091	1.11267	1.11859	1.11664	1.11554	1.1261	1.14275	1.15772	1.15402	1.15493	1.14795	1.14462	1.13521	1.11945	1.11492	1.12288	1.1047	1.09623	1.09593	1.08703	1.07461	1.07485	1.06521	1.05495	1.04238	1.03777	1.02471	1.03482	1.02156	1.01215	1.00409	1.00731	0.988571	0.974536	0.977791	0.952463	0.929265	0.927399	0.947072
auxpin_iaa	1.06491	1.07492	1.08576	1.09947	1.11077	1.10311	1.11533	1.12183	1.11998	1.11828	1.12939	1.1199	1.12849	1.12185	1.11505	1.10684	1.10654	1.10927	1.11324	1.1146	1.10654	1.11335	1.11731	1.11231	1.10498	1.09819	1.09334	1.09452	1.09143	1.08474	1.07595	1.07512	1.07014	1.07702	1.07099	1.05672	1.0579	1.04376	1.02612	1.01209	1.00112
auxpin_iaa	1.07653	1.07475	1.0853	1.08811	1.08526	1.09544	1.09757	1.09291	1.09793	1.10835	1.11917	1.11727	1.11165	1.10915	1.11027	1.1148	1.11031	1.11509	1.11264	1.11106	1.10543	1.10506	1.09272	1.09642	1.08887	1.06751	1.07479	1.07198	1.06415	1.0574	1.04322	1.04382	1.04687	1.04027	1.04706	1.04143	1.0401	1.03953	1.0319	1.03359	1.03463
auxpin_iaa	1.08863	1.08556	1.0887	1.09242	1.09641	1.09798	1.10688	1.12022	1.12232	1.13115	1.13883	1.15414	1.15887	1.16405	1.16735	1.16551	1.1485	1.14084	1.14518	1.15628	1.14588	1.1315	1.14732	1.13848	1.13696	1.13611	1.13642	1.12636	1.11312	1.10065	1.10505	1.09747	1.09332	1.08862	1.08019	1.07775	1.08307	1.07058	1.07752	1.07518	1.06939
auxpin_iaa	1.10281	1.10575	1.10308	1.10334	1.12061	1.11989	1.12313	1.12174	1.13371	1.12275	1.12651	1.11767	1.1195	1.13068	1.12728	1.13543	1.15202	1.16134	1.16949	1.1678	1.17211	1.1711	1.16572	1.15105	1.12056	1.11371	1.12916	1.13759	1.12308	1.11635	1.11692	1.13423	1.13078	1.12287	1.12621	1.12926	1.13184	1.12355	1.11529	1.11752	1.11005
