# Supplementary material for: The AUX1-AFB1-CNGC14 module establishes a longitudinal root surface pH profile
Source: eLife. 2023 Jul 14;12:e85193. doi: 10.7554/eLife.85193 (PMC10414970; doi:10.7554/eLife.85193)
Supplement: Figure 4—figure supplement 1—source data 1. [file elife-85193-fig4-figsupp1-data1.xlsx]

## Sheet: S4-1a
Genotype/condition	Length (µm)	elongation (µm/min)
col_cm	117.921	2.94802
col_cm	107.023	2.67557
col_cm	137.004	3.4251
col_cm	94.453	2.36132
col_cm	124.475	3.11187
col_cm	96.355	2.40888
col_cm	121.402	3.03505
col_cm	115.18	2.8795
col_cm	120.041	3.00102
col_cm	115.631	2.89078
col_cm	132.458	3.31145
col_cm	142.032	3.5508
col_cm	125.829	3.14573
col_cm	135.997	3.39993
col_iaa10nM	68.306	1.70765
col_iaa10nM	63.809	1.59522
col_iaa10nM	70.683	1.76707
col_iaa10nM	65.503	1.63758
col_iaa10nM	72.107	1.80268
col_iaa10nM	71.5	1.7875
col_iaa10nM	73.04	1.826
col_iaa10nM	99.098	2.47745
col_iaa10nM	70.709	1.76772
col_iaa10nM	74.97	1.87425
col_iaa10nM	102.86	2.5715
col_iaa10nM	91.161	2.27902
col_iaa10nM	91.901	2.29752
col_iaa10nM	101.116	2.5279
tir triple_cm	130.567	3.26417
tir triple_cm	123.264	3.0816
tir triple_cm	99.609	2.49023
tir triple_cm	114.659	2.86647
tir triple_cm	129.898	3.24745
tir triple_cm	157.435	3.93587
tir triple_cm	151.792	3.7948
tir triple_cm	167.113	4.17783
tir triple_cm	122.851	3.07127
tir triple_cm	164.431	4.11078
tir triple_cm	147.589	3.68973
tir triple_cm	132.663	3.31657
tir_triple_iaa10nM	71.829	1.79573
tir_triple_iaa10nM	132.914	3.32285
tir_triple_iaa10nM	102.828	2.5707
tir_triple_iaa10nM	111.367	2.78417
tir_triple_iaa10nM	148.125	3.70312
tir_triple_iaa10nM	93.768	2.3442
tir_triple_iaa10nM	129.801	3.24503
tir_triple_iaa10nM	107.89	2.69725
tir_triple_iaa10nM	149.927	3.74817
tir_triple_iaa10nM	119.9	2.9975
tir_triple_iaa10nM	136.622	3.41555
tir_triple_iaa10nM	84.707	2.11768
tir_triple_iaa10nM	91.505	2.28762
tir_triple_iaa10nM	107.378	2.68445
col_cm	75.614	2.52047
col_cm	85.007	2.83357
col_cm	90.441	3.0147
col_cm	85.363	2.84543
col_cm	64.446	2.1482
col_cm	74.593	2.48643
col_cm	61.228	2.04093
col_cm	71.559	2.3853
col_cm	93.817	3.12723
col_cm	106.717	3.55723
col_iaa10nM	49.063	1.63543
col_iaa10nM	88.984	2.96613
col_iaa10nM	43.027	1.43423
col_iaa10nM	49.89	1.663
col_iaa10nM	41.804	1.39347
col_iaa10nM	56.057	1.86857
col_iaa10nM	46.174	1.53913
col_iaa10nM	53.911	1.79703
col_iaa10nM	35.75	1.19167
col_iaa10nM	66.037	2.20123
tir triple_cm	43.027	1.43423
tir triple_cm	47.917	1.59723
tir triple_cm	58.357	1.94523
tir triple_cm	97.851	3.2617
tir triple_cm	111.968	3.73227
tir_triple_iaa10nM	56.821	1.89403
tir_triple_iaa10nM	64.688	2.15627
tir_triple_iaa10nM	62.777	2.09257
tir_triple_iaa10nM	36.632	1.22107
tir_triple_iaa10nM	25.108	0.836933
col_cm	77.235	2.5745
col_cm	80.368	2.67893
col_cm	77.968	2.59893
col_cm	71.5	2.38333
col_cm	96.839	3.22797
col_iaa10nM	53.359	1.77863
col_iaa10nM	58.393	1.94643
col_iaa10nM	44.342	1.47807
col_iaa10nM	64.254	2.1418
col_iaa10nM	50.6	1.68667
tir triple_cm	63.999	2.1333
tir triple_cm	84.321	2.8107
tir triple_cm	74.687	2.48957
tir triple_cm	95.19	3.173
tir triple_cm	68.209	2.27363
tir_triple_iaa10nM	82.815	2.7605
tir_triple_iaa10nM	58.559	1.95197
tir_triple_iaa10nM	54.372	1.8124
tir_triple_iaa10nM	26.605	0.886833
tir_triple_iaa10nM	63.729	2.1243
tir_triple_iaa10nM	52.322	1.74407
col_cm	67.397	2.24657
col_cm	99.714	3.3238
col_cm	76.705	2.55683
col_cm	90.742	3.02473
col_cm	83.689	2.78963
col_cm	78.317	2.61057
col_cm	67.282	2.24273
col_cm	51.703	1.72343
col_iaa10nM	50.216	1.67387
col_iaa10nM	60.53	2.01767
col_iaa10nM	54.447	1.8149
col_iaa10nM	55.255	1.84183
col_iaa10nM	28.184	0.939467
col_iaa10nM	36.714	1.2238
col_iaa10nM	35.813	1.19377
col_iaa10nM	41.254	1.37513
tir triple_cm	95.175	3.1725
tir triple_cm	87.272	2.90907
tir triple_cm	91.505	3.05017
tir triple_cm	97.124	3.23747
tir triple_cm	48.6	1.62
tir triple_cm	123.977	4.13257
tir triple_cm	106.445	3.54817
tir_triple_iaa10nM	8.868	0.2956
tir_triple_iaa10nM	53.945	1.79817
tir_triple_iaa10nM	52.986	1.7662
tir_triple_iaa10nM	36.154	1.20513
tir_triple_iaa10nM	62.507	2.08357
tir_triple_iaa10nM	48.368	1.61227
tir_triple_iaa10nM	39.676	1.32253

## Sheet: S4-1b
distance from root tip (µm)	0	20	40	60	80	100	120	140	160	180	200	220	240	260	280	300	320	340	360	380	400	420	440	460	480	500	520	540	560	580	600	620	640	660	680	700	720	740	760	780	800
col_cm	0.977536	0.981754	0.988405	1.00304	1.01157	1.01169	1.01924	1.01791	1.0197	1.01798	1.02466	1.0306	1.03473	1.04391	1.04312	1.04331	1.04634	1.04531	1.03785	1.02261	1.00471	0.985174	0.956662	0.937457	0.918778	0.902183	0.88801	0.874798	0.868354	0.850852	0.842458	0.838775	0.828381	0.822109	0.820262	0.815567	0.815676	0.809749	0.807939	0.812913	0.811423
col_cm	0.947056	0.952488	0.956437	0.951507	0.95122	0.957013	0.953725	0.960877	0.961895	0.96811	0.979396	0.989735	1.00209	1.00965	1.01814	1.02074	1.02642	1.0389	1.0443	1.05142	1.05263	1.05396	1.05982	1.06439	1.06503	1.06464	1.07181	1.07012	1.07874	1.08286	1.07922	1.06745	1.04457	1.02702	1.0139	1.00145	0.985718	0.965495	0.950225	0.937477	0.926477
col_cm	0.99756	1.00422	1.00738	1.01636	1.02064	1.02553	1.03736	1.02621	1.01972	1.02647	1.02993	1.04111	1.05926	1.0717	1.0801	1.08389	1.09267	1.09737	1.10775	1.10801	1.10162	1.09383	1.07659	1.06075	1.03814	1.01923	1.00143	0.992162	0.975391	0.951644	0.900108	0.925482	0.932988	0.925472	0.915651	0.908352	0.902026	0.896572	0.891569	0.892485	0.885067
col_cm	1.01701	1.02568	1.03058	1.04208	1.05656	1.06366	1.06247	1.06364	1.06269	1.07435	1.0688	1.07619	1.08794	1.10025	1.0976	1.07654	1.0851	1.10555	1.10825	1.09545	1.07843	1.05373	1.03774	1.00989	0.98421	0.973602	0.951171	0.938772	0.921568	0.908378	0.895434	0.889388	0.878857	0.87074	0.864021	0.858549	0.850489	0.850655	0.841167	0.84107	0.835351
col_cm	1.02115	1.03436	1.04042	1.04892	1.06232	1.0707	1.08334	1.08894	1.09257	1.09733	1.10474	1.10493	1.11016	1.11363	1.12191	1.12882	1.1415	1.14275	1.15082	1.15585	1.15456	1.15285	1.1375	1.12002	1.09956	1.08352	1.05992	1.03618	0.998868	0.969308	0.987918	0.975891	0.962043	0.947358	0.932804	0.924242	0.918846	0.911256	0.90049	0.898752	0.891192
col_cm	1.02925	1.04171	1.04537	1.05556	1.06493	1.07487	1.08213	1.07279	1.06939	1.07029	1.06673	1.07641	1.09119	1.09971	1.10024	1.10271	1.09565	1.09352	1.0849	1.06833	1.03679	1.01609	1.00053	0.979032	0.970241	0.964049	0.955791	0.946133	0.936895	0.931079	0.915932	0.914053	0.904417	0.891892	0.886503	0.87973	0.870357	0.869033	0.859796	0.853596	0.846914
col_cm	0.994176	0.996061	1.00432	1.01761	1.028	1.03735	1.05443	1.05732	1.06233	1.07564	1.0806	1.08236	1.08247	1.09241	1.08706	1.08926	1.09251	1.08132	1.07453	1.05383	1.03885	1.03262	1.00888	0.98541	0.969571	0.953962	0.942877	0.926718	0.912167	0.904575	0.901265	0.89213	0.904556	0.90801	0.887361	0.881559	0.880858	0.880732	0.882987	0.889758	0.89117
col_cm	0.988926	0.995884	1.00335	1.01027	1.02269	1.02596	1.02858	1.02996	1.03162	1.03774	1.04168	1.04845	1.05034	1.05823	1.06436	1.05776	1.05107	1.04157	1.02595	1.0021	0.987955	0.97205	0.955904	0.94329	0.937372	0.927838	0.925679	0.919773	0.914789	0.903389	0.90098	0.892778	0.887054	0.879994	0.878456	0.871242	0.867943	0.867038	0.866614	0.866823	0.860319
col_cm	1.01973	1.03387	1.04045	1.05441	1.04961	1.06753	1.06205	1.02535	1.01153	1.04475	1.0634	1.07869	1.08528	1.09151	1.09667	1.09944	1.10293	1.11187	1.1058	1.09622	1.08562	1.08207	1.06726	1.04743	1.02761	1.00955	1.00078	0.98332	0.969679	0.953855	0.943237	0.935746	0.925688	0.917788	0.900091	0.899609	0.891573	0.889836	0.893442	0.891136	0.880639
col_cm	0.975783	0.970346	0.963952	0.970433	0.956014	0.946679
col_cm	1.01059	1.02017	1.02823	1.03371	1.04934	1.05819	1.06732	1.07538	1.08303	1.08992	1.08975	1.08367	1.0825	1.09919	1.11093	1.12825	1.1267	1.13136	1.13807	1.12604	1.10861	1.0965	1.07926	1.06371	1.05171	1.04245	1.02755	1.02044	1.01025	1.00072	0.995635	0.989037	0.978927	0.972144	0.970561	0.965424	0.959059	0.95497	0.953555	0.949319	0.946076
col_cm	1.00435	1.00921	1.01584	1.02331	1.02128	1.02647	1.03304	1.04413	1.04097	1.03396	1.03992	1.04387	1.03914	1.04067	1.03965	1.04412	1.04337	1.0417	1.04739	1.04361	1.04745	1.04408	1.0239	1.00411	0.989838	0.973974	0.967995	0.957974	0.941712	0.936104	0.922083	0.90401	0.893244	0.88678	0.874216	0.872558	0.855903	0.85228	0.85012	0.850806	0.841416
col_cm	1.01593	1.03118	1.0298	1.0459	1.0488	1.0671	1.07288	1.07956	1.07875	1.0879	1.09375	1.09905	1.11213	1.10965	1.1083	1.10612	1.11603	1.11416	1.10399	1.09584	1.07849	1.06429	1.05224	1.03163	1.01432	0.995923	0.980999	0.967828	0.9588	0.947005	0.937563	0.923337	0.915185	0.908505	0.90601	0.899699	0.894293	0.888873	0.88446	0.884566	0.878313
col_cm	1.00095	1.01246	1.01983	1.02681	1.02702	1.02958	1.04738	1.04978	1.06114	1.05937	1.04532	1.04258	1.05355	1.07039	1.08297	1.09224	1.10341	1.10708	1.10869	1.10955	1.1062	1.10191	1.06798	1.0394	1.02345	0.998262	0.982281	0.970964	0.960042	0.945187	0.938972	0.931647	0.916063	0.902658	0.89041	0.879233	0.867714	0.859761	0.856795	0.849891	0.849271
col_cm	1.02974	1.03419	1.042	1.03274	1.04564	1.04903	1.05745	1.0732	1.07846	1.08434	1.08896	1.08312	1.08767	1.09963	1.11095	1.11593	1.11641	1.12361	1.12176	1.11913	1.11245	1.0915	1.0747	1.05871	1.03955	1.01903	0.998224	0.982649	0.965267	0.944808	0.92859	0.914476	0.900147	0.88605	0.871382	0.867636	0.859812	0.859007	0.853353	0.856048	0.859508
col_cm	1.03872	1.05211	1.06498	1.07967	1.09033	1.09397	1.10453	1.10439	1.11591	1.11095	1.12106	1.13085	1.11948	1.1162	1.11966	1.12129	1.12808	1.13229	1.1213	1.10467	1.08521	1.06271	1.03932	1.02702	1.00817	0.98551	0.972794	0.959959	0.946241	0.932311	0.927089	0.915306	0.906269	0.899443	0.893894	0.897089	0.887236	0.882409	0.881404	0.878447	0.871108
col_cm	1.03456	1.0432	1.05308	1.0602	1.06992	1.07988	1.09118	1.09876	1.08981	1.08519	1.08968	1.109	1.12288	1.13234	1.14164	1.1431	1.15076	1.15623	1.16045	1.15577	1.14998	1.14046	1.12879	1.0972	1.0883	1.07855	1.06187	1.04208	1.02561	1.00617	1.00073	0.987454	0.9732	0.961493	0.954566	0.943104	0.9291	0.920377	0.906121	0.896818	0.892002
col_cm	0.997212	1.00745	1.01139	1.02517	1.03194	1.03932	1.04845	1.05432	1.06022	1.06337	1.07423	1.08629	1.09223	1.10385	1.11175	1.11528	1.10989	1.10242	1.09786	1.08185	1.06297	1.04265	1.01921	1.00554	0.987808	0.969049	0.953577	0.945408	0.931259	0.922114	0.910264	0.909019	0.903762	0.898994	0.895457	0.888595	0.883536	0.881283	0.88148	0.8859	0.879425
col_cm	0.990677	0.98726	0.996626	1.00469	1.01072	1.01344	1.02022	1.03075	1.0319	1.03998	1.04109	1.0448	1.04889	1.05588	1.06204	1.07663	1.06852	1.07745	1.07882	1.07457	1.06035	1.03086	1.02554	1.02246	1.0261	1.0122	0.989188	0.985331	0.972018	0.9706	0.963128	0.957831	0.949897	0.943414	0.93856	0.93584	0.928795	0.925464	0.921161	0.919821	0.91907
col_cm	0.973656	0.982693	0.996378	1.00532	1.00565	1.00722	1.0231	1.02565	1.03657	1.03366	1.03079	1.02998	1.04534	1.06533	1.07553	1.07458	1.06102	1.0511	1.04169	1.02327	1.01147	0.990977	0.973396	0.955298	0.939776	0.916227	0.900762	0.888593	0.877477	0.870322	0.858043	0.846221	0.839009	0.833041	0.828537	0.830339	0.825114	0.823555	0.819178	0.817749	0.817476
col_cm	0.977769	0.979599	0.983221	0.996362	1.00038	1.01288	1.02064	1.0257	1.02866	1.03479	1.04126	1.03957	1.03837	1.02475	1.01676	0.99753	0.982119	0.964395	0.951431	0.936418	0.922314	0.906254	0.897741	0.88561	0.881793	0.869623	0.866763	0.863741	0.853131	0.851771	0.848906	0.837542	0.830544	0.832261	0.826907	0.825437	0.828548	0.826119	0.826077	0.822137	0.820008
col_cm	0.98414	0.990109	1.00181	1.01279	1.01732	1.02761	1.03828	1.05073	1.05745	1.06515	1.06566	1.06344	1.07233	1.08329	1.09702	1.10694	1.11772	1.11989	1.11418	1.10021	1.09301	1.08367	1.08886	1.09343	1.08578	1.06837	1.05268	1.04017	1.0229	1.0045	0.991303	0.983161	0.966433	0.957324	0.946809	0.94031	0.935823	0.928063	0.918303	0.917887	0.907362
col_cm	0.990801	1.00504	1.0103	1.0218	1.0284	1.03673	1.04975	1.04293	1.04768	1.04603	1.04825	1.05369	1.0718	1.08404	1.09434	1.09685	1.10438	1.10543	1.11318	1.11368	1.10104	1.09161	1.07916	1.06436	1.04477	1.02553	1.01142	1.00126	0.984639	0.973589	0.959903	0.951485	0.940732	0.931049	0.926387	0.915636	0.910139	0.90635	0.893682	0.899836	0.892382
col_cm	0.982724	0.996495	0.998615	1.00656	1.01535	1.03173	1.04383	1.04283	1.04648	1.04957	1.05345	1.06252	1.07015	1.07757	1.07743	1.08626	1.09923	1.10271	1.11747	1.12622	1.12734	1.12359	1.11114	1.08677	1.06007	1.02737	0.997518	0.973938	0.952346	0.939507	0.927443	0.909019	0.895752	0.888387	0.876828	0.869619	0.862177	0.855336	0.848655	0.846098	0.836967
col_cm	0.99763	0.998959	0.999009	1.00813	1.00967	1.00407	1.00994	1.01723	1.02323	1.02653	1.03068	1.02896	1.03331	1.03761	1.04251	1.04802	1.04997	1.05054	1.06332	1.05405	1.04755	1.03012	1.01591	0.9917	0.969317	0.953681	0.938133	0.921672	0.906565	0.896136	0.886244	0.872822	0.866387	0.859861	0.856427	0.843897	0.83893	0.829041	0.824023	0.82373	0.820234
col_cm	0.990324	0.9984	1.00755	1.00676	1.01062	1.0155	1.01502	1.0196	1.02635	1.03132	1.03116	1.03422	1.03772	1.04242	1.04832	1.05529	1.05932	1.06898	1.06274	1.05293	1.04448	1.03415	1.02519	1.01164	0.992168	0.969849	0.954714	0.935205	0.915231	0.900714	0.887797	0.874546	0.864857	0.85748	0.849763	0.844027	0.83912	0.830039	0.830476	0.826561	0.823409
col_cm	0.991176	0.997672	0.99957	1.01526	1.02245	1.03613	1.03574	1.03974	1.03452	1.03677	1.04601	1.03254	1.02921	1.04584	1.05886	1.06191	1.07923	1.08268	1.09372	1.09309	1.07856	1.05221	1.03558	1.0209	0.99938	0.975712	0.953304	0.93356	0.914584	0.902388	0.889084	0.881603	0.869409	0.863103	0.848325	0.841147	0.837182	0.825791	0.818811	0.81604	0.807018
col_cm	1.01147	1.01365	1.0286	1.03586	1.03969	1.04523	1.05616	1.06661	1.06619	1.06327	1.05696	1.0748	1.07453	1.08163	1.10281	1.10008	1.10199	1.1104	1.10352	1.11069	1.10076	1.09706	1.09186	1.07363	1.05614	1.02488	1.00478	0.987127	0.96344	0.947763	0.933792	0.924726	0.913018	0.89805	0.895024	0.885215	0.88244	0.877002	0.86846	0.861455	0.858566
col_cm	1.0094	1.01494	1.02798	1.03621	1.03674	1.04397	1.04713	1.04328	1.05015	1.05569	1.04889	1.0506	1.05966	1.07736	1.08229	1.09222	1.10326	1.11355	1.12753	1.13083	1.12608	1.11775	1.0959	1.06787	1.03998	1.00653	0.988172	0.966835	0.946611	0.935467	0.916238	0.897621	0.885341	0.877048	0.870937	0.859411	0.855012	0.851299	0.845636	0.840063	0.831496
col_cm	0.988509	0.986373	0.997666	0.997463	0.998894	1.00149	1.00544	0.996369	0.997038	0.999258	1.00195	0.997933	1.00287	0.998095	1.00267	0.996046	0.995993	0.990501	0.983564	0.967068	0.957556	0.948093	0.931769	0.919641	0.903476	0.89267	0.882508	0.873722	0.869428	0.866375	0.864145	0.866145	0.857918	0.855792	0.856733	0.857516	0.854023	0.854919	0.85175	0.848233	0.85169
col_cm	1.00934	1.01662	1.0155	1.02394	1.02636	1.02859	1.03619	1.04479	1.04165	1.03964	1.04377	1.0458	1.04943	1.04476	1.03706	1.03613	1.04008	1.07407	1.08971	1.09605	1.09279	1.08171	1.07181	1.06908	1.06363	1.03961	1.03378	1.02502	1.00604	0.993175	0.982939	0.965694	0.950964	0.935317	0.922153	0.915511	0.906057	0.896898	0.891007	0.883875	0.876724
col_cm	0.990947	0.989116	0.992788	0.989624	0.998205	1.00238	1.00792	1.01788	1.02026	1.01692	1.01906	1.02315	1.02633	1.02792	1.0354	1.03916	1.04224	1.04232	1.04109	1.03962	1.02783	1.01266	0.996573	0.981635	0.968021	0.950733	0.934201	0.9167	0.903616	0.893401	0.877255	0.869765	0.864934	0.849077	0.844277	0.83432	0.826415	0.823559	0.822849	0.818355	0.814985
col_cm	0.99462	1.00543	1.00501	1.00741	1.00799	1.01001	1.00931	1.017	1.01316	1.00728	1.00905	1.01304	1.018	1.01644	1.0147	1.01812	1.01929	1.0302	1.02943	1.03439	1.04088	1.03065	1.02581	1.0043	0.999219	0.994304	0.980798	0.972691	0.963926	0.962465	0.947242	0.941457	0.931296	0.921175	0.910307	0.903833	0.898676	0.885198	0.882787	0.87787	0.868741
col_cm	0.993449	1.00009	1.00604	1.01325	1.02139	1.02934	1.03969	1.03802	1.02713	1.02054	1.01931	1.01041	1.02925	1.03878	1.04522	1.06231	1.06778	1.07689	1.0804	1.09503	1.09625	1.09456	1.0872	1.07322	1.0475	1.02856	0.993793	0.977487	0.95888	0.941493	0.921695	0.901075	0.889784	0.87178	0.865287	0.852649	0.848359	0.838811	0.826715	0.822718	0.815235
col_cm	0.999329	1.00367	1.00975	1.00814	1.01589	1.01776	1.03177	1.03379	1.02971	1.02812	1.02918	1.03235	1.0425	1.04196	1.05234	1.05179	1.04974	1.04643	1.03707	1.01726	0.988265	0.971606	0.953854	0.934553	0.917452	0.89584	0.880596	0.872626	0.861112	0.852409	0.844595	0.842404	0.837476	0.831443	0.824353	0.823471	0.821268	0.817033	0.818578	0.81657	0.814059
col_cm	1.00965	1.01742	1.01254	1.02626	1.02703	1.0288	1.04749	1.03859	1.04137	1.03342	1.02837	1.04258	1.04578	1.04219	1.03257	1.06366	1.07513	1.06908	1.06303	1.07011	1.08206	1.08293	1.07658	1.06322	1.04795	1.02797	1.00406	0.985898	0.957466	0.934895	0.923436	0.91002	0.88855	0.874325	0.873715	0.867291	0.8649	0.853402	0.846717	0.839373	0.831773
col_cm	1.01415	1.0117	1.01119	1.02176	1.01995	1.02243	1.02978	1.02924	1.0254	1.02941	1.0293	1.02989	1.03208	1.03016	1.02212	1.02541	1.03553	1.04253	1.03971	1.04178	1.03343	1.01405	1.0069	0.99139	0.979354	0.968275	0.947091	0.930077	0.919431	0.911051	0.904123	0.891234	0.8808	0.880031	0.878057	0.876312	0.8707	0.859482	0.848243	0.838451	0.829039
tir_cm	0.964782	0.977287	0.976209	0.97533	0.993147	0.987014	0.988986	1.00028	1.00405	1.0136	1.02234	1.02483	1.03383	1.03741	1.0316	1.0222	1.02076	1.00819	0.989706	0.971093	0.953132	0.933804	0.920073	0.906708	0.886298	0.876216	0.867004	0.859828	0.855521	0.842583	0.843166	0.838798	0.82867	0.827625	0.826858	0.823948	0.821325	0.819245	0.817599	0.823121	0.824726
tir_cm	1.0193	1.02517	1.04189	1.04623	1.06976	1.0778	1.08393	1.09134	1.08753	1.07045	1.06584	1.09352	1.1184	1.12455	1.13272	1.13323	1.1328	1.12425	1.11951	1.10548	1.07868	1.0569	1.04152	1.0182	1.00044	0.986362	0.969973	0.95602	0.937943	0.933239	0.91564	0.904785	0.896901	0.892367	0.890572	0.883704	0.879844	0.876584	0.873797	0.871027	0.870488
tir_cm	0.998097	1.00879	1.0235	1.01972	1.03409	1.04298	1.04937	1.06335	1.06103	1.06549	1.06014	1.06271	1.07366	1.09112	1.10407	1.10682	1.1042	1.09571	1.09055	1.07764	1.06952	1.05108	1.03257	1.01395	0.999561	0.980794	0.966243	0.949714	0.936543	0.934492	0.922913	0.920099	0.911561	0.901815	0.900467	0.886164	0.882324	0.882613	0.875683	0.87396	0.872257
tir_cm	0.965868	0.973162	0.979283	0.975306	0.969963	0.976575	0.99147	1.00226	1.00434	0.998667	1.00337	1.00577	1.01245	1.00906	1.00233	1.01226	1.00315	0.989172	0.978081	0.961566	0.940045	0.923717	0.913011	0.898741	0.893148	0.878308	0.870543	0.857693	0.853451	0.845807	0.839733	0.835468	0.826976	0.824018	0.82056	0.816468	0.822733	0.816511	0.819824	0.823409	0.823553
tir_cm	0.969084	0.979067	0.986818	1.00053	1.01507	1.02431	1.02305	1.03065	1.02731	1.02822	1.02267	1.02655	1.02347	1.02611	1.02873	1.02557	1.00744	1.01688	1.03088	1.02405	1.00366	0.980579	0.963496	0.954133	0.935123	0.92536	0.910164	0.901782	0.897108	0.882862	0.87065	0.860315	0.854626	0.851611	0.848314	0.844059	0.842278	0.840268	0.828238	0.825702	0.819086
tir_cm	0.970497	0.971938	0.977198	0.996962	1.00268	1.01752	1.03	1.02973	1.02497	1.02081	1.01395	1.01762	1.02773	1.01856	1.029	1.03438	1.03571	1.03907	1.02886	1.01083	0.998731	0.97663	0.946881	0.931737	0.910534	0.891619	0.877828	0.858988	0.84883	0.836972	0.82999	0.822591	0.820884	0.809586	0.805852	0.800118	0.797707	0.795104	0.792124	0.792449	0.791285
tir_cm	0.984683	0.995186	1.01082	1.02233	1.02574	1.02623	1.04538	1.05362	1.05685	1.06495	1.0695	1.06349	1.06795	1.06489	1.06804	1.05672	1.03949	1.02792	1.00313	0.987838	0.964949	0.946957	0.928597	0.915447	0.902177	0.888872	0.872709	0.860169	0.847903	0.838927	0.829376	0.819969	0.816098	0.814089	0.806457	0.807015
tir_cm	0.998987	1.01159	1.02779	1.04053	1.04997	1.06195	1.07374	1.08766	1.08996	1.09861	1.09561	1.09451	1.08122	1.06568	1.04763	1.02407	1.0085	0.985424	0.965148	0.944553	0.925944	0.905866	0.896631	0.887856	0.877913	0.872943	0.868579	0.862086	0.852762	0.846097	0.837405	0.836123	0.833613	0.826309	0.826312	0.824235	0.818439
tir_cm	0.995553	1.01123	1.01903	1.03096	1.04079	1.05145	1.05875	1.06441	1.07187	1.07756	1.07999	1.07961	1.07915	1.08956	1.08544	1.08269	1.06436	1.03996	1.02101	0.997021	0.973115	0.950607	0.938558	0.925886	0.915196	0.90348	0.890102	0.877185	0.873817	0.867661	0.863661	0.856402	0.857302	0.84995	0.841985	0.843178	0.84621	0.844779	0.843287	0.839115	0.837181
tir_cm	0.999106	1.00268	1.01815	1.02511	1.03782	1.04655	1.04871	1.04151	1.03968	1.0416	1.04189	1.04723	1.04582	1.04592	1.05016	1.03852	1.02582	1.00611	0.9913	0.969911	0.952366	0.941474	0.926719	0.91332	0.904342	0.893249	0.887003	0.884992	0.875007	0.863102	0.865508	0.863447	0.871148	0.869212	0.861928	0.860885	0.858818	0.866342	0.856541	0.861432	0.861257
tir_cm	0.978165	0.984785	0.980715	0.986652	1.00191	1.00946	1.02815	1.03507	1.03354	1.03773	1.03633	1.02775	1.0224	1.01261	1.00383	0.987729	0.977054	0.956943	0.941463	0.923844	0.914674	0.902551	0.884533	0.877764	0.871625	0.860983	0.85906	0.858727	0.861664	0.855742	0.857954	0.858043	0.859103	0.861686	0.856576	0.861646	0.862819	0.860312	0.857134	0.855345	0.854533
tir_cm	1.0017	1.01692	1.02504	1.03352	1.04839	1.05694	1.06576	1.06952	1.06756	1.07313	1.06886	1.06884	1.06575	1.06664	1.06656	1.05569	1.05024	1.03978	1.02666	1.01089	0.991718	0.968949	0.949022	0.934349	0.915406	0.900529	0.891341	0.883319	0.873267	0.8674	0.862168	0.85895	0.858644	0.855207	0.855842	0.859105	0.86008	0.860045	0.858865	0.847322	0.848
tir_cm	0.913487	0.922616	0.928235	0.931192	0.941284	0.952184	0.953266	0.953328	0.960046	0.963959	0.96535	0.967799	0.961953	0.957661	0.940409	0.926131	0.908169	0.885395	0.865052	0.846003	0.831982	0.811859	0.80141	0.794248	0.788487	0.785119	0.778006	0.779346	0.773404	0.773353	0.770645	0.769631	0.765386	0.759084	0.762635	0.75672	0.754162	0.755509	0.748531	0.746391	0.737754
tir_cm	0.944951	0.954126	0.958181	0.970418	0.977745	0.978934	0.985741	0.985692	0.984322	0.983774	0.980365	0.978053	0.976284	0.984161	0.978018	0.968449	0.967509	0.965515	0.955588	0.943367	0.925818	0.917963	0.90369	0.891499	0.88269	0.878505	0.869832	0.864674	0.856197	0.849277	0.847045	0.840333	0.832992	0.830729	0.823609	0.816543	0.808108	0.802112	0.78954	0.780452	0.772573
tir_cm	0.959691	0.966937	0.969038	0.974518	0.983733	0.996312	0.99801	1.00395	1.00729	1.0034	1.00347	0.996712	0.99617	0.990064	0.976216	0.961298	0.954039	0.94343	0.9338	0.928654	0.921961	0.921714	0.919614	0.915078	0.916371	0.916043	0.911955	0.909486	0.906236	0.89887	0.887837	0.884233	0.873954	0.868311	0.860713	0.852942	0.842868	0.836686	0.831934	0.827903	0.816929
tir_cm	0.969348	0.976706	0.981348	0.983672	0.984126	0.987541	0.984169	0.981162	0.976531	0.978229	0.976724	0.972371	0.9713	0.964421	0.947567	0.936116	0.923136	0.914039	0.899954	0.889425	0.871193	0.858076	0.849864	0.839359	0.833366	0.826299	0.824354	0.813136	0.808391	0.800029	0.795534	0.793137	0.788441	0.79017	0.786979	0.784958	0.780775	0.777538	0.776271	0.781746	0.781994
tir_cm	0.949958	0.955726	0.958509	0.960177	0.959394	0.968327	0.962683	0.958795	0.956582	0.965994	0.964753	0.970338	0.971086	0.972202	0.964585	0.965396	0.9562	0.952814	0.950572	0.936076	0.928765	0.908276	0.890735	0.879103	0.861717	0.858599	0.851777	0.852459	0.844424	0.837724	0.823432	0.810921	0.804795	0.802135	0.795769	0.792771	0.792843	0.786454	0.774689	0.779134	0.77199
tir_cm	0.915461	0.918102	0.919048	0.913863	0.91476	0.911501	0.906146	0.904734	0.904383	0.902416	0.907542	0.915543	0.921819	0.917054	0.922301	0.922841	0.912403	0.894401	0.882025	0.870396	0.857875	0.843349	0.837648	0.831912	0.825732	0.824289	0.813971	0.802289	0.797126	0.796078	0.789555	0.784302	0.780888	0.779475	0.777173	0.775733	0.773467	0.769409	0.767534	0.770061	0.767132
tir_cm	0.946131	0.950587	0.960305	0.960022	0.962349	0.953421	0.956259	0.950686	0.941881	0.939693	0.934332	0.924145	0.923885	0.923774	0.917393	0.909576	0.897637	0.887974	0.881987	0.874177	0.860778	0.849959	0.836543	0.822441	0.812676	0.800044	0.796118	0.785816	0.780991	0.77575	0.766814	0.763203	0.761547	0.762067	0.758612	0.755299	0.752183	0.748732	0.751228	0.74885	0.744216
tir_cm	0.935223	0.940886	0.934878	0.9338	0.943333	0.939512	0.936436	0.940034	0.929746	0.924768	0.92439	0.925275	0.923913	0.920126	0.910017	0.896086	0.888416	0.878484	0.872609	0.868412	0.855962	0.842351	0.83245	0.823993	0.817462	0.808263	0.805216	0.795981	0.794246	0.793222	0.789664	0.782317	0.779359	0.778372	0.778801	0.769066	0.773022	0.768827	0.765701	0.76586	0.761175
tir_cm	0.961467	0.961767	0.963178	0.969691	0.973247	0.966031	0.966317	0.964227	0.959199	0.960016	0.957992	0.955767	0.953543	0.958137	0.962764	0.964751	0.959185	0.964062	0.96429	0.958956	0.952054	0.937945	0.925338	0.916227	0.894681	0.877324	0.866778	0.854214	0.844342	0.835243	0.831888	0.822098	0.811868	0.81116	0.810097	0.802201	0.802952	0.794867	0.791066	0.789851	0.790098
tir_cm	0.973691	0.975551	0.983069	0.985146	0.995263	0.998165	0.996682	1.00017	0.991841	0.983824	0.984348	0.988786	0.989737	0.990684	0.988999	0.990014	0.985591	0.976356	0.969904	0.960498	0.950412	0.939283	0.9315	0.915027	0.899179	0.889843	0.873494	0.864807	0.849619	0.842266	0.83204	0.826273	0.823982	0.816742	0.819949	0.812067	0.80514	0.806594	0.801261	0.796476	0.791531
tir_cm	1.00347	1.01036	1.0079	0.99868	1.00279	1.00996	1.01033	1.00364	0.992536	0.996325	1.00332	0.993053	0.99091	0.989262	0.989435	0.977519	0.963695	0.953684	0.946331	0.933242	0.917555	0.907713	0.899297	0.892256	0.884593	0.87873	0.868831	0.85654	0.84834	0.846054	0.833451	0.825858	0.825297	0.825246	0.82411	0.81896	0.814333	0.811324	0.807308	0.806033	0.808415
tir_cm	0.983679	0.987085	0.986541	0.992024	0.988794	0.983943	0.977	0.969917	0.96028	0.943579	0.943169	0.950669	0.949267	0.947493	0.937195	0.928341	0.92081	0.906607	0.894676	0.875486	0.863259	0.854365	0.838754	0.824807	0.818067	0.805121	0.803667	0.801892	0.801834	0.795152	0.790078	0.786218	0.779172	0.777597	0.776533	0.767867	0.766125	0.767026	0.764995	0.763941	0.762941
tir_cm	1.02386	1.03188	1.02698	1.01583	1.01203	1.00345	0.997681	0.98247	0.968402	0.948579	0.937775	0.923555	0.91571	0.903909	0.891718	0.883128	0.870162	0.860014	0.855546	0.845367	0.839025	0.830667	0.822542	0.81245	0.806537	0.80035	0.797838	0.796183	0.786918	0.788861	0.783336	0.781336	0.776401	0.772746	0.771263	0.769624	0.768434	0.767144	0.769269	0.769398	0.768619

## Sheet: S4-1c
d	0	20	40	60	80	100	120	140	160	180	200	220	240	260	280	300	320	340	360	380	400	420	440	460	480	500	520	540	560	580	600	620	640	660	680	700	720	740	760	780	800
col_iaa	0.0836056	0.0811652	0.0877307	0.0941774	0.0909848	0.0995098	0.0835923	0.0871336	0.0972352	0.114459	0.129702	0.124787	0.126425	0.121019	0.1256	0.135494	0.137181	0.142727	0.153077	0.156898	0.160116	0.15388	0.152926	0.151948	0.148005	0.145749	0.147091	0.138942	0.147477	0.143086	0.146871	0.141825	0.141651	0.148543	0.141523	0.144794	0.145727	0.144611	0.145554	0.139424	0.143493
col_iaa	0.0593298	0.0614936	0.064637	0.077998	0.08588	0.0980071	0.102236	0.106934	0.11826	0.137681	0.144577	0.141143	0.149226	0.161447	0.15029	0.143384	0.128092	0.120224	0.11265	0.105447	0.0977704	0.0890129	0.0781885	0.0814364	0.084471	0.0894458	0.0942932	0.0981481	0.110674	0.115215	0.118546	0.121659	0.122662	0.1286	0.134207	0.134131	0.132062	0.138935	0.140286	0.137678	0.138617
col_iaa	0.0576698	0.0618265	0.0703649	0.071936	0.0645404	0.0598934	0.0724569	0.0850466	0.0828989	0.0770424	0.0723929	0.0698936	0.0871541	0.101483	0.111812	0.116021	0.113908	0.105443	0.0982677	0.0990101	0.0897569	0.0780428	0.0783546	0.07522	0.0781537	0.0790507	0.0843612	0.0870098	0.0946515	0.0991264	0.0979817	0.104287	0.103211	0.106124	0.108728	0.106676	0.105549	0.107424	0.11323	0.11282	0.113144
col_iaa	0.0475097	0.0478856	0.0484448	0.0563875	0.0543947	0.0532422	0.0491933	0.0468304	0.048886	0.0447398	0.0472475	0.042905	0.0367692	0.0248402	0.0147812	0.001753	-0.0119165	-0.0243241	-0.0311155	-0.0396813	-0.0432712	-0.0422003	-0.0373132	-0.0318557	-0.0237003	-0.0109175	0.00425872	0.009071	0.0221251	0.0239901	0.0392326	0.0448318	0.0543238	0.0572435	0.0667552	0.0742926	0.0814974	0.0854447	0.0941935	0.0973168	0.100458
col_iaa	0.049049	0.0515773	0.0513464	0.0537729	0.0602753	0.0600349	0.0566584	0.0581289	0.0661375	0.0654411	0.0684815	0.0789903	0.0804859	0.0783597	0.0839879	0.0889384	0.0815241	0.0776248	0.0681512	0.055139	0.0502068	0.047246	0.0511919	0.0511061	0.0512426	0.0558816	0.0593685	0.0583424	0.0752588	0.0847161	0.0891625	0.0928052	0.107756	0.110599	0.11715	0.114386	0.114825	0.113538	0.117668	0.118025	0.122348
col_iaa	0.0496678	0.0499391	0.0528788	0.0529413	0.0629523	0.0705457	0.0706605	0.0760822	0.0797628	0.0793798	0.0851664	0.0936524	0.0959872	0.100537	0.100849	0.100004	0.0943186	0.0764992	0.0696496	0.0585227	0.0575463	0.0571277	0.0584426	0.0612484	0.0594497	0.0692243	0.0777641	0.0842021	0.087695	0.0945791	0.102072	0.102358	0.11138	0.116987	0.120211	0.121675	0.125653	0.129907	0.139769	0.137143	0.145477
col_iaa	0.0474575	0.045851	0.0451804	0.0481554	0.0500693	0.0430159	0.0349424	0.0394921	0.0425723	0.0508585	0.072283	0.0782209	0.0812599	0.10565	0.112517	0.117342	0.112283	0.111291	0.104674	0.0963777	0.09705	0.100812	0.0959583	0.099522	0.101422	0.109396	0.104737	0.102562	0.108152	0.117832	0.125424	0.136076	0.142332	0.146271	0.148855	0.157126	0.161816	0.177722	0.176966	0.175241	0.175329
col_iaa	0.0629675	0.060278	0.0737079	0.0787711	0.0839919	0.0851584	0.082156	0.0961581	0.109317	0.119225	0.132384	0.143382	0.14284	0.147757	0.153146	0.143829	0.12905	0.120719	0.105608	0.0925006	0.0811559	0.0814537	0.0824643	0.0844351	0.0905806	0.101535	0.110587	0.11802	0.123274	0.128253	0.1338	0.136613	0.142462	0.15096	0.155287	0.154952	0.157118	0.158319	0.157463	0.158398	0.154474
col_iaa	0.0853186	0.0855417	0.0786364	0.0721315	0.0687883	0.0766512	0.0793384	0.0883277	0.0966299	0.0979277	0.104912	0.106407	0.106761	0.116842	0.116224	0.127934	0.138922	0.137893	0.134361	0.132947	0.12377	0.115295	0.116739	0.121963	0.120508	0.131833	0.1396	0.142793	0.148565	0.159214	0.168415	0.166441	0.170457	0.177603	0.185849	0.184404	0.197239	0.193986	0.193144	0.194427	0.19335
col_iaa	0.0743759	0.0767275	0.075502	0.0753291	0.0765685	0.0798338	0.079713	0.0820951	0.0888396	0.0943425	0.0920574	0.0994754	0.0887628	0.0790794	0.117792	0.128858	0.127748	0.113527	0.11338	0.109852	0.107967	0.108219	0.10135	0.102606	0.0974217	0.112286	0.111101	0.112562	0.111736	0.110029	0.123841	0.125627	0.130826	0.137055	0.140752	0.145595	0.145916	0.147202	0.14789	0.152458	0.152907
col_iaa	0.0460355	0.0390506	0.0372497	0.0501006	0.0501549	0.0496214	0.0491549	0.0585395	0.0627651	0.0671468	0.083024	0.0752377	0.0655277	0.0597188	0.0526323	0.0423481	0.0374915	0.0182046	0.00788898	-0.00776421	-0.00694552	0.000151475	0.00660496	0.0138547	0.0297331	0.0379533	0.048011	0.0658478	0.0730193	0.0830003	0.0866642	0.0912893	0.104702	0.103887	0.112766	0.108467	0.119321	0.127093	0.133145	0.130204	0.13104
col_iaa	0.051896	0.06441	0.0647317	0.0644692	0.0633815	0.0670372	0.0652012	0.0704756	0.0808059	0.0902625	0.095302	0.107518	0.111771	0.118083	0.12482	0.140773	0.136594	0.140364	0.140434	0.132433	0.130643	NA	NA	NA	NA	NA	NA	NA	NA	NA	NA	NA	NA	NA	NA	NA	NA	NA	NA	NA	NA
col_iaa	0.0656421	0.0663625	0.0762196	0.0706173	0.0723868	0.0755471	0.0659029	0.0783836	0.0871998	0.0972455	0.0959001	0.10846	0.114681	0.122336	0.136407	0.152864	0.166143	0.175188	0.179681	0.180251	0.190362	0.186689	0.194552	NA	NA	NA	NA	NA	NA	NA	NA	NA	NA	NA	NA	NA	NA	NA	NA	NA	NA
col_iaa	0.0627046	0.0706924	0.069322	0.0724965	0.0738653	0.0859255	0.0720778	0.0606069	0.0656615	0.0601839	0.0650736	0.0834518	0.109767	0.115307	0.129235	0.136988	0.132263	0.130057	0.129912	0.117165	0.108125	0.103963	0.0962287	0.0962474	0.0940654	0.0951642	0.0972474	0.102581	0.107845	0.112563	0.116136	0.121992	0.131505	0.136944	0.136466	0.13903	0.138048	0.139598	0.144879	0.140475	0.14486
col_iaa	0.0711771	0.0648655	0.0691218	0.0665091	0.0721919	0.0816783	0.0807921	0.087101	0.101328	0.104011	0.100877	0.122688	0.125282	0.136838	0.148042	0.158311	0.164219	0.164632	0.165876	0.169919	0.175754	0.177756	0.166303	0.159586	0.170423	0.166525	0.166059	0.164677	0.162672	0.161177	0.164814	0.156454	0.153947	0.153719	0.150556	0.153122	0.151696	0.147812	0.15182	0.135218	0.13799
col_iaa	0.081576	0.0837401	0.0933905	0.0910349	0.0928115	0.0985501	0.0966101	0.10265	0.109689	0.107292	0.111905	0.114992	0.108131	0.109539	0.127069	0.137378	0.143857	0.141529	0.155263	0.151888	0.147207	0.153138	0.147342	0.148158	0.146421	0.148308	0.148454	0.147555	0.144885	0.147118	0.144604	0.138234	0.142644	0.145824	0.150954	0.150219	0.145204	0.153513	0.15027	0.149528	0.149412
col_iaa	0.0627355	0.0662449	0.0656147	0.0641758	0.0642726	0.0454267	0.0490293	0.0838262	0.0845251	0.0895485	0.0995652	0.0890223	0.0624126	0.0490362	0.0662694	0.0539071	0.0588131	0.0619228	0.064051	0.0738872	0.0878898	0.0959273	0.106241	0.11055	0.11795	0.135327	0.14515	0.148336	0.149756	0.161355	0.16021	0.159453	0.169295	0.171666	0.173532	0.174997	0.174087	0.168952	0.160209	0.161162	0.164796
col_iaa	0.0588705	0.0543143	0.056635	0.0557672	0.0616727	0.0676936	0.0652912	0.0727423	0.079083	0.0839709	0.0848399	0.0786254	0.0933617	0.0967652	0.101891	0.111088	0.116488	0.11657	0.124074	0.126012	0.125112	0.132417	0.142299	0.14084	0.141957	0.129838	0.127026	0.130323	0.134858	0.139826	0.137384	0.142839	0.147749	0.157029	0.155636	0.161749	0.163057	0.15885	0.162379	0.158452	0.155162
col_iaa	0.0305272	0.0241365	0.0310503	0.0264316	0.0258268	0.0365558	0.0355233	0.0385031	0.0413353	0.0433237	0.0492823	0.0529147	0.0639377	0.070777	0.0787574	0.0857656	0.0940729	0.0949392	0.102651	0.112159	0.126451	0.137708	0.141666	0.137165	0.147889	0.15068	0.148394	0.148044	0.151144	0.150246	0.154577	0.151047	0.150276	0.149105	0.151125	0.152964	0.149162	0.146756	0.147639	0.14504	0.149103
col_iaa	0.0155811	0.0151512	0.0149481	0.00951202	0.0079737	0.00808499	0.0116042	0.019181	0.0241081	0.024698	0.0299029	0.0328726	0.032407	0.0425482	0.0413106	0.0569659	0.0528511	0.0512508	0.0689386	0.0696023	0.0807155	0.0882823	0.108489	0.109643	0.120261	0.116367	0.121601	0.12384	0.126371	0.125505	0.129982	0.134978	0.139213	0.147116	0.148456	0.145903	0.14833	0.143836	0.151413	0.153287	0.14815
col_iaa	0.01174	0.0124398	0.01608	0.0205453	0.0261021	0.0288534	0.0218371	0.0405293	0.0454269	0.051492	0.0609804	0.0609229	0.0645255	0.0801458	0.0758959	0.0549826	0.0278094	0.0358267	0.0634022	0.0865548	0.109105	0.109813	0.113273	0.115788	0.110911	0.113841	0.116386	0.11407	0.109403	0.110012	0.121848	0.134651	0.137879	0.140767	0.141963	0.137662	0.134886	0.138746	0.13786	0.135838	0.144451
col_iaa	0.0167021	0.0182736	0.0166923	0.0149182	0.0138968	0.0157616	0.0181799	0.0277923	0.0353861	0.0440563	0.0517807	0.0598214	0.0685204	0.0752337	0.0873866	0.092854	0.102018	0.112032	0.121285	0.130075	0.140754	0.153074	0.161154	0.163929	0.159397	0.161925	0.159155	0.153696	0.149052	0.152226	0.146221	0.144171	0.140911	0.144441	0.144756	0.147054	0.146919	0.146183	0.146808	0.145139	0.142194
col_iaa	0.0264082	0.0215756	0.0253131	0.0244657	0.0273601	0.0262282	0.0234435	0.0243268	0.0287426	0.0283443	0.0315939	0.0347679	0.0347362	0.0316939	0.0388286	0.0452753	0.0480912	0.050284	0.0628677	0.0624732	0.0697006	0.0832334	0.0882223	0.0964396	0.0953873	0.0948532	0.0940796	0.0869859	0.0817875	0.0827576	0.0775307	0.0737159	0.0749634	0.0794525	0.0754047	0.0715648	0.0739837	0.0742374	0.0732067	0.070671	0.0639548
col_iaa	0.0270454	0.0337261	0.024722	0.0170807	0.0262277	0.0191615	0.0346114	0.0342325	0.0461888	0.0495534	0.0577288	0.0636278	0.0618618	0.0671892	0.0672494	0.0704927	0.0758699	0.0769694	0.0828878	0.0856634	0.0805137	0.0804381	0.0780929	0.0744211	0.0719065	0.0713448	0.0749899	0.081961	0.0813317	0.0807349	0.0837564	0.0855572	0.0861341	0.0923597	0.0942777	0.0963229	0.10026	0.098396	0.0977807	0.103844	0.103329
col_iaa	0.00351116	0.00237354	0.00232317	0.00045527	0.00289834	-0.00381131	-0.0125987	-0.0116122	1.6e-05	0.00527297	0.0136628	0.0319073	0.031895	0.0233238	0.0328623	0.0442789	0.0624678	0.0749752	0.081589	0.099489	0.106684	0.112113	0.11496	0.106622	0.101388	0.0995169	0.0901407	0.0869455	0.0616207	0.077574	0.0776515	0.0764814	0.0786683	0.0744438	0.0716527	0.0695128	0.0666975	0.0637541	0.0629343	0.052484	0.0552068
col_iaa	-0.00294571	-8.5e-06	0.00695412	0.00580162	0.0133887	0.00901083	-0.000849998	-0.00197909	0.00581449	0.0209802	0.0333939	0.0425057	0.0455859	0.0524808	0.0601695	0.0639639	0.0687864	0.0636532	0.0570788	0.0495401	0.0349076	0.0336147	0.0270945	0.0305049	0.029835	0.0318451	0.0303283	0.0376953	0.0408929	0.0424478	0.052114	0.0575535	0.0594252	0.0643451	0.0712395	0.0763171	0.0785826	0.0758529	0.0753669	0.0832045	0.0836486
col_iaa	0.0207411	0.0279377	0.0285337	0.0233357	0.0240067	0.0257607	0.0284293	0.0313258	0.0371493	0.0385631	0.0389975	0.0522407	0.0476695	0.058035	0.057802	0.0614196	0.0797715	0.0894237	0.103343	0.110469	0.120207	0.139368	0.155731	0.155111	0.154655	0.158538	0.154039	0.155517	0.158316	0.157717	0.152514	0.150721	0.149458	0.146666	0.149067	0.14422	0.140714	0.128109	0.115004	0.125724	0.127663
col_iaa	0.0104871	0.0133974	0.00878933	0.00511473	0.00533261	0.0133429	0.0037258	-0.00140488	-0.00587974	-0.00916551	-0.00654714	-1.66e-05	0.0017233	-0.000365668	0.00958766	0.0276381	0.0523406	0.0731876	0.0883909	0.105808	0.11649	0.12722	0.13079	0.143449	0.140371	0.133185	0.125742	0.122221	0.120281	0.116388	0.115888	0.116232	0.115149	0.115206	0.117758	0.119118	0.116845	0.115821	0.112696	0.11339	0.113652
col_iaa	0.0229462	0.0248537	0.0238164	0.0190594	0.0246217	0.0321834	0.0242922	0.0220157	0.027136	0.0280791	0.032581	0.0357723	0.0319835	0.0369356	0.0420389	0.0515382	0.0640478	0.0801757	0.0833875	0.0808909	0.082717	0.084877	0.0804697	0.074277	0.0749123	0.0674211	0.0649668	0.0580479	0.0526419	0.0554134	0.056637	0.0597236	0.0582004	0.0577982	0.0626178	0.0646686	0.0606154	0.0569131	0.0577298	0.0510492	0.0577421
col_iaa	0.0036127	-0.000994009	0.00371002	-0.000564598	-8.38e-05	0.00118549	0.00399055	-0.00231894	-0.00445985	-0.000208814	0.00943828	0.0213151	0.0220373	0.0298636	0.0403836	0.0490213	0.0524704	0.0449014	0.0354658	0.023241	0.0193528	0.0204641	0.0204729	0.0325763	0.038371	0.048218	0.0579036	0.0719787	0.0804828	0.0837747	0.0930677	0.0922858	0.0917938	0.0919578	0.0940706	0.101029	0.100978	0.0931067	0.0998089	0.0936537	0.0986829
col_iaa	0.0200553	0.0175907	0.0106618	0.00583942	0.0101974	0.0129243	0.0140874	0.0223508	0.0327077	0.026701	0.0261081	0.0243877	0.0250542	0.0242257	0.0269472	0.0396329	0.0412203	0.0405737	0.0339336	0.0308953	0.0384493	0.0444257	0.0371068	0.0434424	0.0521856	0.0557505	0.0633379	0.074233	0.0845043	0.0852172	0.0916487	0.0939719	0.101581	0.101094	0.0982243	0.0962889	0.0962019	0.0947183	0.101215	0.0989387	0.092928
col_iaa	0.00043669	-0.00468598	-0.00368367	-0.00370193	-0.00551432	-0.00746274	-0.0197721	-0.0185543	-0.0258263	-0.0274359	-0.0296899	-0.0266799	-0.0261658	-0.018533	-0.0178496	-0.0123114	-0.0114983	-0.0185046	-0.022426	-0.0232071	-0.0203208	-0.016639	-0.0176142	-0.0115923	0.00266272	0.0176024	0.0282446	0.0318669	0.0426158	0.0542425	0.0606909	0.0724685	0.0805239	0.092641	0.0912063	0.103996	0.109443	0.113693	0.117427	0.114623	0.116148
col_iaa	0.0211225	0.0187013	0.027318	0.0233645	0.0294361	0.0257086	0.0154929	0.0212447	0.0202081	0.015922	0.0109246	0.0105829	0.0135227	0.0139587	0.0160071	0.0188889	0.0258582	0.0197109	0.0162091	0.0134886	0.0116418	0.00574604	0.0103948	0.0095828	0.0230832	0.0331829	0.0481054	0.0540965	0.0650169	0.0758171	0.0775037	0.0863926	0.0871889	0.0825047	0.0789868	0.0768175	0.0730821	0.0786457	0.0681604	0.0661817	0.0674805
col_iaa	0.038566	0.0370599	0.0356918	0.0435349	0.044035	0.0375315	0.0414783	0.044566	0.0493696	0.0484746	0.0329634	0.0328206	0.0469628	0.0554054	0.0648523	0.0793531	0.0967016	0.101682	0.102056	0.117103	0.118611	0.127899	0.137376	0.132448	0.125412	0.130828	0.128482	0.131838	0.139814	0.138709	0.14346	0.14004	0.145403	0.153458	0.147899	0.146933	0.14498	0.143348	0.133448	0.130182	0.12921
col_iaa	0.0564053	0.0515253	0.0530909	0.0391398	0.0424565	0.0397734	0.0370062	0.0314823	0.032735	0.0292027	0.023226	0.0272084	0.0315568	0.0321201	0.0313579	0.0330228	0.0394033	0.0307844	0.0309469	0.025639	0.0316279	0.0414731	0.042282	0.048254	0.0552599	0.0718233	0.0870486	0.0895569	0.0984611	0.111085	0.117696	0.11327	0.116073	0.115819	0.117468	0.11136	0.112224	0.114354	0.10855	0.104645	0.0997032
col_iaa	0.0344238	0.0366817	0.0339247	0.0289792	0.034933	0.0354655	0.0288801	0.0356262	0.0340335	0.0356587	0.0320728	0.026456	0.0316425	0.0311187	0.0373474	0.0451143	0.0587808	0.0811336	0.0889562	0.0867625	0.090349	0.0878848	0.0853167	0.0913956	0.0948185	0.104518	0.104188	0.103272	0.109185	0.115882	0.125193	0.122573	0.130037	0.138015	0.142596	0.142658	0.144083	0.150535	0.144332	0.133436	0.133474
col_iaa	0.047782	0.0420035	0.0428688	0.0391555	0.0396067	0.0373367	0.0308029	0.0337483	0.0436387	0.0451565	0.063537	0.066824	0.0702128	0.066968	0.0643178	0.0646629	0.0553321	0.0462488	0.0426674	0.0309176	0.0257454	0.0251602	0.0347488	0.030856	0.0302822	0.037933	0.0399921	0.0414995	0.0487367	0.055527	0.0585524	0.0522877	0.0576118	0.055332	0.0526384	0.0584884	0.0627439	0.064175	0.0713696	0.0683828	0.0697128
tir_iaa	0.0612957	0.0668954	0.0764824	0.0842115	0.0891562	0.099336	0.104117	0.106207	0.111946	0.117158	0.134162	0.124704	0.129968	0.122184	0.110599	0.0947827	0.0690862	0.0600212	0.0396608	0.0329678	0.0268799	0.0252656	0.0219917	0.0253343	0.0326045	0.0375272	0.0462228	0.0503004	0.0517345	0.0506638	0.057977	0.0587098	0.0573505	0.0514016	0.0557833	NA	NA	NA	NA	NA	NA
tir_iaa	0.0672487	0.0934752	0.0825891	0.0632107	0.03884	0.0260694	0.0279568	0.0521724	0.044561	0.00401634	-0.0315177	-0.0512658	-0.0625163	-0.0666331	-0.0683315	-0.0692025	-0.0694502	-0.0565245	-0.0415475	-0.0383123	-0.048981	-0.0220358	-0.00911446	0.00241179	0.0163971	0.0233587	0.0254381	0.0326254	0.040868	0.0449923	0.0500436	0.0538137	0.0559664	0.0547445	0.0539129	0.0501765	0.0473384	0.0456694	0.0495189	0.0525302	0.0525059
tir_iaa	0.0579664	0.0718448	0.0651181	0.0595591	0.0522353	0.0422915	0.0480964	0.0467067	0.0395981	0.0290427	0.0180446	-0.00254862	-0.0201331	-0.0355221	-0.044177	-0.0556079	-0.0650582	-0.0677599	-0.0693657	-0.0654459	-0.0627423	-0.055575	-0.0434582	-0.0388318	-0.030444	-0.0228662	-0.0185324	-0.0170636	-0.00646921	-0.00412787	-0.000717628	0.00364708	0.00608457	0.00807127	0.00972008	0.0131361	0.0208129	0.0251326	0.0233654	0.029015	0.0341432
tir_iaa	0.0444029	0.0451267	0.0468232	0.0534107	0.0542769	0.062448	0.0697711	0.0715064	0.0701408	0.0459655	0.0394958	0.0507804	0.0616258	0.0893362	0.11914	0.115605	0.123494	0.127642	0.122168	0.119187	0.108744	0.108484	0.100429	0.0988926	0.0931157	0.0830255	0.0812567	0.07611	0.082762	0.0810057	0.0775518	0.0823658	0.0830759	0.0858832	0.0873322	0.0783332	0.0776789	0.0761277	0.0784825	0.0795077	0.0781058
tir_iaa	0.0589643	0.0597489	0.0661893	0.0749852	0.07925	0.0791639	0.0897463	0.0980468	0.0830137	0.085657	0.0825693	0.0682772	0.0700166	0.0470695	0.0319675	0.0190866	0.00323721	-0.00230082	-0.0129595	-0.00561635	-0.00416858	0.00405188	0.0154135	0.0181489	0.025789	0.0288272	0.0317621	0.0387229	0.0386434	0.0398714	0.0408229	0.0437683	0.0403155	0.0418983	0.0389627	0.0374043	0.035721	0.0361448	0.0386888	0.0339167	0.0312883
tir_iaa	0.0574134	0.0684988	0.0749816	0.0765167	0.0811481	0.0875285	0.0887832	0.0935891	0.0996815	0.0973838	0.0939247	0.0940735	0.0987533	0.0989977	0.0967523	0.0992085	0.103212	0.081325	0.0865472	0.0898409	0.0897935	0.0924217	0.0876159	0.0799461	0.0764931	0.0729524	0.0702332	0.0687897	0.0685642	0.0645494	0.0596547	0.0619067	0.0561304	0.0530717	0.0508765	0.0509236	0.0503762	0.0498898	0.0535414	0.0477233	0.0516224
tir_iaa	0.00514993	0.0130047	0.0181209	0.00665125	0.0147175	0.0272774	0.0317586	0.0243767	0.023293	0.00783075	0.00372433	-0.00580973	-0.0192492	-0.0311178	-0.045698	-0.0545676	-0.0631904	-0.0692511	-0.0673765	-0.0549261	-0.0454126	-0.0496498	-0.0380659	-0.0263782	-0.0255878	-0.00910789	-0.00769811	-0.00181745	0.0140217	0.0166434	0.0248952	NA	NA	NA	NA	NA	NA	NA	NA	NA	NA
tir_iaa	0.0499981	0.0533787	0.0582064	0.0655819	0.0714263	0.0778523	0.0847959	0.0864846	0.0937788	0.0926547	0.0978083	0.0969022	0.0958829	0.099534	0.106889	0.103659	0.104761	0.104869	0.104656	0.108196	0.107963	0.0964378	0.0936389	0.0888879	0.0951377	0.0987163	0.101441	0.0991456	0.0952822	0.0984684	0.0940954	0.0975768	0.0983615	0.100584	0.0967633	0.0945369	0.0935381	0.0928424	0.0924374	0.0907967	0.0873812
tir_iaa	0.0104945	0.00892943	0.0116188	0.0201537	0.0182978	0.0231807	0.0235156	0.0273821	0.0421707	0.0483766	0.0514415	0.0561326	0.0473641	0.0393162	0.0333665	0.0281444	0.0184712	0.0161203	0.0140672	0.00964983	0.00374854	0.00593681	0.00630817	0.008008	0.014144	0.0174526	0.0219275	0.0271969	0.029028	0.0310401	0.0358311	0.0381898	0.0429382	0.044713	0.0392626	0.0474215	0.04512	0.0434545	0.0475164	0.0505499	0.044206
tir_iaa	0.0384169	0.0385726	0.0509963	0.0587179	0.0655504	0.064633	0.0621835	0.0485457	0.0483691	0.0786134	0.0926124	0.100989	0.108113	0.114932	0.117738	0.125934	0.140343	0.147462	0.145826	0.142794	0.134612	0.13296	0.123597	0.121199	0.114307	0.1087	0.0931804	0.0828177	0.0803952	0.0729359	0.0700954	0.0682743	0.0691403	0.0641285	0.0594528	0.0599438	0.0545073	0.0535855	0.0544664	0.0524456	0.0566409
tir_iaa	0.0166898	0.0144601	0.0167971	0.0205533	0.0280679	0.0365793	0.0409739	0.0396159	0.0448404	0.0537289	0.052529	0.0541057	0.0643153	0.0675665	0.0816607	0.0900992	0.103256	0.108787	0.105298	0.0974516	0.0914487	0.0778541	0.0711856	0.064528	0.0647266	0.0603413	0.0581759	0.055691	0.0595793	0.0580059	0.0631415	0.0615263	0.0639476	0.0685806	0.0624063	0.0628101	0.0630273	0.0627582	0.0660669	0.0675867	0.0708057
tir_iaa	0.0155263	0.0179877	0.0168838	0.0217856	0.0228593	0.0260981	0.0198853	0.0267083	0.0316024	0.0486938	0.0612624	0.0733793	0.068541	0.0745687	0.082169	0.0822755	0.0855983	0.0863028	0.0811457	0.0736453	0.0733172	0.071602	0.0753643	0.0759859	0.0693699	0.0687926	0.0734182	0.0709894	0.0718766	0.0687604	0.0654806	0.0625526	0.0554908	0.0528179	0.0486308	0.0461608	0.0430202	0.0350672	0.0313025	0.0295298	0.0287044
tir_iaa	0.0476119	0.0527163	0.0497613	0.0529795	0.0519834	0.0651454	0.066224	0.0598745	0.051251	0.0308572	0.0232916	0.0688894	0.0769368	0.0742169	0.067279	0.0617157	0.061162	0.0528329	0.0507628	0.0546379	0.058875	0.0623511	0.0681317	0.0749759	0.0783924	0.0862893	0.0945549	0.099351	0.101597	0.105426	0.116159	0.119146	0.122883	0.130597	0.13075	0.139984	0.127187	0.133305	0.143678	0.151881	0.170587
tir_iaa	0.0151042	0.0134251	0.0211261	0.020347	0.0250186	0.0313314	0.0314576	0.024232	0.0146107	-0.000395497	-0.0128366	-0.0229547	-0.0411279	-0.0638346	-0.0799513	-0.0898014	-0.0927902	-0.0847141	-0.0805558	-0.0725943	-0.0655197	-0.0582619	-0.0469993	-0.0386021	-0.0331271	-0.0238092	-0.0173614	-0.00900873	NA	NA	NA	NA	NA	NA	NA	NA	NA	NA	NA	NA	NA
tir_iaa	0.00713452	0.00559786	0.0113169	0.0184857	0.0207219	0.0254284	0.0378286	0.0422439	0.046473	0.0507031	0.0474527	0.0427336	0.0387553	0.020512	0.00419041	-0.00409904	-0.0142425	-0.0181193	-0.0242185	-0.0268304	-0.01778	-0.00201288	0.0121535	0.0170241	0.0288829	0.0381441	0.0482293	0.059045	0.0649519	0.0684188	0.0751767	0.0796063	0.0816506	0.0847296	0.0840385	0.0866558	0.0870357	0.0914388	0.0916288	0.0869835	0.0813955
tir_iaa	0.0288743	0.0328114	0.0404827	0.041265	0.0474598	0.0524892	0.0587592	0.0651329	0.0718163	0.088714	0.0927456	0.0950343	0.0964934	0.0955371	0.0924761	0.101769	0.0835235	0.079189	0.0936839	0.0934831	0.094223	0.0939966	0.0824595	0.0868827	0.0847289	0.0889633	0.0890698	0.0907546	0.0890198	0.0963378	0.098443	0.0961833	0.0960839	0.0904065	0.0905885	0.0900612	0.0889372	0.0851569	0.0867802	0.0832645	0.0813863
tir_iaa	0.00616893	0.0039182	-0.0321331	-0.0242191	-0.0091911	0.00024852	6.23e-05	0.000584371	0.00998398	0.0117897	0.0182811	0.0177807	0.0182265	0.00905989	0.00685254	-0.00051321	-0.01288	-0.0224591	-0.0243861	-0.0313389	-0.0405585	-0.0463029	-0.0474365	-0.0488579	-0.0513927	-0.0591014	-0.0515936	-0.0518592	-0.0504349	-0.0456256	-0.0456319	-0.0400986	-0.0422991	-0.0392731	-0.03978	-0.0326333	-0.0308643	-0.0319881	-0.0315531	-0.0262407	-0.0223109
tir_iaa	0.0285921	0.0237797	0.0211983	0.0181955	0.0153499	0.0180752	0.024546	0.0328884	0.035619	0.0429893	0.048097	0.0554149	0.0319057	0.0446895	0.0682898	0.0834835	0.0904455	0.0992635	0.101594	0.11	0.115243	0.118295	0.11892	0.12001	0.115591	0.119647	0.125771	0.119271	0.121079	0.128859	0.129735	0.122245	0.114851	0.10706	0.0985977	0.0979837	0.0890362	0.0906756	0.0791177	0.0715813	0.0695631
tir_iaa	0.0286505	0.0148564	0.0194926	0.0141514	0.00879373	0.00489726	0.00866959	0.00811885	0.0133726	0.0126368	0.00385263	-0.0014419	-0.00974705	-0.0287567	-0.028374	-0.0513622	-0.0577156	-0.0686143	-0.0747004	-0.0781396	-0.0791875	-0.0694673	-0.0652332	-0.0618508	-0.0596709	-0.0548163	-0.0526334	-0.0466087	-0.0458401	-0.0435249	-0.0418765	-0.0392406	-0.0358489	-0.0315212	-0.0309865	-0.0298374	-0.0326154	-0.0345995	-0.0327977	-0.0341122	-0.0334391
tir_iaa	-0.0265917	-0.0253513	-0.0246281	-0.0285281	-0.0458178	-0.0331625	-0.0304273	-0.0269559	-0.0119225	-0.00342808	0.000692562	0.00484227	-0.000243652	0.00809478	0.0118713	0.00635344	0.00319537	-0.00609308	-0.0104008	-0.0217894	-0.0155897	-0.0103954	-0.0159379	-0.0206384	-0.0166903	-0.0202261	-0.0195018	-0.0155615	-0.0190148	-0.0179756	-0.00942485	-0.0162727	-0.0163631	-0.0194331	-0.0248331	-0.0214799	-0.0257136	-0.0213547	-0.0191265	-0.02246	-0.0222337
tir_iaa	0.00533951	0.00145287	-0.00129664	-0.0134288	-0.0121444	-0.0203011	-0.0235637	-0.0237075	-0.0307293	-0.029726	-0.0298996	-0.0338541	-0.0378172	-0.0395837	-0.0369323	-0.0291183	-0.0202028	-0.0178383	-0.0113492	0.00285973	0.0221412	0.0373778	0.0478028	0.0552767	0.0638508	0.0757423	0.0844783	0.0896076	0.0958106	0.0998771	0.107995	0.10996	0.113652	0.119595	0.119032	0.124764	0.12473	0.121482	0.127426	0.128448	0.128919
tir_iaa	0.0537718	0.0537526	0.0603805	0.0612325	0.0670571	0.0739103	0.0766723	0.0859157	0.0958877	0.097518	0.102502	0.103563	0.103407	0.104703	0.0983282	0.100418	0.0965202	0.0940131	0.0915117	0.0925263	0.0928377	0.0860646	0.0814869	0.0816759	0.0859868	0.0914721	0.0910114	0.0897754	0.0868204	0.0908387	0.0905643	0.0936212	0.0940243	0.0921747	0.0889926	0.083749	0.082072	0.0843477	0.0797802	0.0756301	0.0683466
tir_iaa	0.0408678	0.0399502	0.0426161	0.0435559	0.0451033	0.0452631	0.0430236	0.0369718	0.0387823	0.0371004	0.0349786	0.0351662	0.0406563	0.0352192	0.033008	0.0278963	0.0209858	0.0174277	0.018217	0.00981789	0.0107066	0.0169689	0.0126067	0.0148005	0.0146318	0.0105832	0.0135594	0.0195169	0.0139489	0.0167151	0.0226426	0.022465	0.0188393	0.0224213	0.0187206	0.0155644	0.0151763	0.0150255	0.019116	0.0169711	0.00923662
tir_iaa	0.026015	0.0234062	0.0212995	0.030388	0.0317389	0.0398822	0.0388752	0.0359466	0.0468583	0.0491514	0.0443752	0.0451378	0.0476674	0.0582265	0.0507104	0.0653899	0.0864745	0.0917418	0.0892427	0.0783375	0.0780892	0.0693846	0.0586901	0.0504523	0.0498564	0.0480789	0.0434432	0.0440922	0.0417997	0.0403886	0.0402428	0.0341795	0.0323692	0.0337732	0.0370499	0.0341845	0.0320993	0.0359274	0.0364464	0.0338054	0.0285268
tir_iaa	0.0934047	0.0970141	0.106677	0.112811	0.114956	0.129207	0.123925	0.116189	0.127728	0.131317	0.127726	0.126456	0.1125	0.110566	0.101109	0.0900438	0.0743756	0.0761647	0.070314	0.0643396	0.0626198	0.0745096	0.0781539	0.0834873	0.0836005	0.0931146	0.0937337	0.093391	0.0970412	0.0947637	0.100185	0.100373	0.0961274	0.094562	0.0872931	0.085391	0.0792552	0.0793066	0.0754046	0.0677562	0.0603483
tir_iaa	0.0724932	0.0795813	0.0834751	0.0903129	0.0866733	0.0874695	0.0636526	0.0643902	0.0930508	0.103441	0.106537	0.108222	0.107748	0.105085	0.102983	0.103122	0.0995533	0.0928757	0.0823428	0.0801334	0.0776616	0.0748651	0.0668987	0.06407	0.0634794	0.0617494	0.0579943	0.0566221	0.0535462	0.0463865	0.0481327	0.0519246	0.046819	0.0393948	0.0336902	0.0352883	0.0332736	0.0348614	0.0322674	0.0289203	0.026903
tir_iaa	0.0172967	0.0226683	0.0272004	0.0343538	0.0373609	0.0292341	0.0239526	0.0297224	0.0297653	0.0363053	0.0454899	0.0461025	0.0480609	0.046754	0.0488313	0.0503102	0.0562442	0.0550496	0.0555577	0.0578494	0.0532426	0.0531254	0.0551381	0.049544	0.0435275	0.0411568	0.0359901	0.0345197	0.0332119	0.0315303	0.0245877	0.0230795	0.0207362	0.015807	0.00497334	0.00690502	-0.00213173	-1.5e-05	-0.00621945	-0.010152	-0.0135825
tir_iaa	0.0282099	0.0321984	0.0281014	0.0291676	0.0177383	0.0206308	0.0219787	0.0249362	0.0181597	0.0102274	0.0065789	0.00144143	-0.0169089	-0.0314145	-0.0399732	-0.0422136	-0.055679	-0.0649299	-0.0576198	-0.0564043	-0.0444172	-0.0342466	-0.0241874	-0.0154111	-0.00619614	0.00455718	0.00575953	0.0115196	0.0154973	0.0231452	0.0243294	0.0260472	0.0287311	0.0247826	0.0311425	0.0388823	0.0400304	0.0379728	0.0408551	0.043767	0.0421496
tir_iaa	0.0320943	0.023328	0.0285404	0.0240234	0.0207395	0.0206541	0.0288288	0.0226954	0.0262051	0.0323773	0.0298682	0.0288398	0.0354314	0.0369054	0.0468545	0.0481256	0.0468802	0.0465622	0.0398907	0.0448855	0.0379362	0.0359888	0.031992	0.0357275	0.0390517	0.0323406	0.0284794	0.0244035	0.0225364	0.0171705	0.0213913	0.0202134	0.0188644	0.0184873	0.011684	0.0140842	0.0135408	0.0133427	0.0121252	0.00695354	0.00697859
tir_iaa	0.0154788	0.0192522	0.0135773	0.0199328	0.0220136	0.0175951	0.0155454	0.0183117	0.0202863	0.0171615	0.0174226	0.0167466	0.0053603	-0.0123002	-0.0206757	-0.0274982	-0.0345891	-0.0401146	-0.0423131	-0.0435601	-0.0505257	-0.0458752	-0.0453096	-0.0431195	-0.0419552	-0.037832	-0.0343418	-0.0346436	-0.0314669	-0.0292482	-0.0308875	-0.0295078	-0.0262698	-0.0203141	-0.0267998	-0.024843	-0.0227971	-0.02721	-0.0243821	-0.0262308	-0.0257188

## Sheet: S4-1e
	Experiment 12th May combined Col0 and abp1
	microns	Col0_1	Col0_2	Col0_3	Col0_4	Col0_5	Col0_6	Col0_7	Col0_8	abp 1_1	abp 1_2	abp 1_3	abp 1_4	abp 1_5	abp 1_6	abp 1_7	abp 1_8	abp 1_9	abp 1_10
	0	0.722094	0.725955	0.716185	0.717147	0.6942	0.686614	0.70152	0.710725	0.757156	0.729245	0.713048	0.705227	0.725762	0.724296	0.699009	0.71307	0.6997	0.760124
	20	0.726777	0.734457	0.737289	0.70982	0.70203	0.700763	0.718661	0.721788	0.769897	0.728817	0.728786	0.719901	0.720118	0.734654	0.712117	0.716546	0.717527	0.7774
	40	0.745059	0.73264	0.745726	0.713906	0.713613	0.711248	0.726583	0.733596	0.773164	0.727039	0.738105	0.735147	0.725122	0.750218	0.72685	0.730551	0.73302	0.777266
	60	0.756787	0.736756	0.759768	0.732345	0.714703	0.705967	0.72707	0.747513	0.771514	0.725805	0.741748	0.748111	0.726647	0.745217	0.722276	0.73496	0.738345	0.780649
	80	0.747377	0.758454	0.757978	0.744559	0.741326	0.703726	0.729512	0.738507	0.792544	0.752194	0.745149	0.750845	0.746697	0.739895	0.750061	0.72735	0.756017	0.789229
	100	0.755048	0.753571	0.767605	0.752559	0.766142	0.734266	0.729937	0.763034	0.803509	0.77489	0.750512	0.75533	0.77775	0.775631	0.782556	0.742516	0.75927	0.801859
	120	0.770127	0.76837	0.812776	0.764538	0.773679	0.744953	0.713567	0.785755	0.819931	0.770941	0.753473	0.752673	0.790048	0.791486	0.785264	0.786184	0.757328	0.817584
	140	0.786459	0.793514	0.82591	0.773518	0.775481	0.757753	0.736722	0.790423	0.832727	0.752444	0.745187	0.753274	0.776644	0.800439	0.794911	0.791846	0.78498	0.828599
	160	0.798327	0.800422	0.822692	0.771323	0.78952	0.775712	0.764779	0.797103	0.811046	0.765119	0.787371	0.782763	0.789656	0.806918	0.811517	0.792343	0.800827	0.836958
	180	0.807349	0.805042	0.820252	0.765355	0.801941	0.781452	0.774194	0.812515	0.810003	0.777635	0.811153	0.793073	0.803146	0.812022	0.819032	0.800076	0.807915	0.838549
	200	0.818777	0.81954	0.828836	0.793907	0.818844	0.791134	0.783321	0.822018	0.821024	0.79016	0.812357	0.796885	0.81072	0.81807	0.822336	0.80545	0.814791	0.849127
	220	0.809424	0.820717	0.829231	0.808856	0.824573	0.791943	0.785476	0.825773	0.831366	0.794893	0.817705	0.805554	0.824687	0.82752	0.830584	0.812652	0.821173	0.861806
	240	0.830868	0.824723	0.845612	0.809623	0.833765	0.810401	0.796648	0.853651	0.859552	0.79791	0.819621	0.81246	0.8348	0.844951	0.833216	0.834006	0.8301	0.861621
	260	0.838369	0.846338	0.862445	0.817336	0.842787	0.817108	0.796795	0.863888	0.874096	0.796826	0.828518	0.815997	0.835769	0.857504	0.85215	0.847685	0.840181	0.85893
	280	0.862549	0.854959	0.874839	0.829697	0.844834	0.829087	0.813093	0.869062	0.8765	0.813044	0.836156	0.825413	0.823929	0.861219	0.854014	0.86772	0.860156	0.868767
	300	0.866895	0.867371	0.874228	0.833832	0.847702	0.827185	0.817231	0.861704	0.862099	0.826077	0.850907	0.83176	0.835961	0.85636	0.858599	0.874456	0.87226	0.885125
	320	0.870364	0.855731	0.868869	0.843954	0.843116	0.826826	0.828775	0.861127	0.875549	0.821853	0.851575	0.837389	0.832427	0.857881	0.861841	0.869874	0.876151	0.874693
	340	0.869038	0.846864	0.865525	0.859848	0.837289	0.821107	0.813491	0.85554	0.87289	0.824828	0.865461	0.837844	0.834707	0.851446	0.853533	0.871626	0.866028	0.876605
	360	0.851427	0.836369	0.851729	0.863748	0.818089	0.806116	0.804438	0.841636	0.889153	0.823878	0.857763	0.826441	0.827604	0.84568	0.842446	0.852849	0.861966	0.872676
	380	0.843995	0.818895	0.845326	0.846463	0.819866	0.790434	0.79685	0.830492	0.883141	0.814537	0.846787	0.826816	0.816635	0.840398	0.834239	0.837833	0.855853	0.859526
	400	0.828533	0.808987	0.838116	0.821695	0.814304	0.774412	0.776828	0.825898	0.879472	0.803767	0.830936	0.814827	0.801343	0.840717	0.832988	0.830105	0.855709	0.851895
	420	0.833429	0.798107	0.839505	0.808863	0.797398	0.78332	0.769385	0.826328	0.858356	0.795315	0.803793	0.803786	0.792501	0.827557	0.823864	0.825914	0.858077	0.825506
	440	0.817102	0.804696	0.822056	0.78548	0.780867	0.783181	0.764988	0.801525	0.833694	0.778096	0.785435	0.798213	0.777146	0.802779	0.811821	0.817423	0.86727	0.815303
	460	0.804824	0.789709	0.802481	0.775919	0.782685	0.772069	0.772329	0.783011	0.814449	0.77537	0.774852	0.805437	0.756124	0.800123	0.805122	0.800386	0.860761	0.808291
	480	0.808271	0.784085	0.800491	0.768067	0.78302	0.767353	0.758908	0.780486	0.794242	0.776524	0.773371	0.796285	0.764517	0.800998	0.799537	0.798955	0.833821	0.798874
	500	0.799905	0.791839	0.802929	0.768552	0.767684	0.760398	0.746656	0.774327	0.794013	0.762802	0.762101	0.78106	0.762794	0.794161	0.794187	0.793613	0.822722	0.794085
	520	0.78835	0.794124	0.790704	0.756732	0.755942	0.745554	0.753545	0.769711	0.779916	0.759205	0.758634	0.775021	0.757589	0.777789	0.778889	0.779622	0.830136	0.776937
	540	0.777415	0.788018	0.779109	0.746799	0.757258	0.737367	0.74764	0.756354	0.768212	0.756699	0.762551	0.783642	0.759483	0.763028	0.771824	0.773403	0.821336	0.771119
	560	0.764546	0.783355	0.766813	0.751722	0.757226	0.738251	0.743367	0.750349	0.768191	0.750965	0.752751	0.776571	0.75148	0.752555	0.774009	0.757807	0.803127	0.775836
	580	0.753152	0.773896	0.756907	0.756448	0.746539	0.736352	0.73225	0.74756	0.765877	0.747962	0.749571	0.765533	0.750253	0.74593	0.768502	0.747954	0.789679	0.762179
	600	0.750528	0.769675	0.753297	0.748071	0.739319	0.743213	0.736718	0.744185	0.756736	0.743928	0.747078	0.75578	0.744132	0.736335	0.759029	0.745399	0.785155	0.757891
	620	0.738737	0.763036	0.746798	0.741322	0.737537	0.741026	0.738068	0.742949	0.744859	0.739653	0.734362	0.747483	0.742896	0.727804	0.748669	0.743038	0.774267	0.757537
	640	0.724628	0.75597	0.744231	0.735591	0.731026	0.732702	0.737381	0.734547	0.739342	0.739254	0.728268	0.741745	0.745617	0.722474	0.745058	0.734286	0.76384	0.7592
	660	0.731035	0.747183	0.73963	0.724695	0.730915	0.722342	0.735268	0.736204	0.73051	0.735362	0.730911	0.733306	0.741527	0.729284	0.748396	0.731367	0.758945	0.754
	680	0.736242	0.754344	0.751222	0.727059	0.72022	0.711881	0.725569	0.740129	0.725717	0.725114	0.72725	0.72842	0.741578	0.724378	0.737987	0.738133	0.747721	0.752012
	700	0.726251	0.758734	0.74058	0.72725	0.720223	0.710616	0.727131	0.727776	0.718669	0.718251	0.71982	0.722199	0.73439	0.715781	0.734849	0.729387	0.752752	0.743854
	720	0.716466	0.747738	0.726213	0.727507	0.726756	0.703432	0.733334	0.727118	0.715434	0.725268	0.728014	0.726649	0.738809	0.703418	0.733328	0.72159	0.747176	0.742562
	740	0.709806	0.737493	0.724374	0.723252	0.733272	0.700189	0.726394	0.722707	0.719844	0.720057	0.731107	0.725054	0.735221	0.703237	0.734551	0.713681	0.734971	0.734041
	760	0.710146	0.731344	0.726445	0.727157	0.72051	0.697743	0.722862	0.72034	0.726235	0.711222	0.723873	0.715461	0.72654	0.70361	0.730264	0.711996	0.725959	0.720121
	780	0.707618	0.735254	0.726571	0.720036	0.718563	0.691324	0.722909	0.711748	0.713265	0.709521	0.715243	0.706843	0.719093	0.702544	0.726901	0.713767	0.722666	0.713149
	800	0.706593	0.735538	0.717672	0.718096	0.714978	0.692706	0.72239	0.709277	0.710937	0.713801	0.71218	0.702178	0.715964	0.697756	0.722738	0.713575	0.72241	0.705429
	820	0.707417	0.730643	0.720195	0.714689	0.713935	0.691421	0.724759	0.710005	0.710464	0.708668	0.716016	0.702312	0.72144	0.697837	0.716334	0.711909	0.718739	0.704294
	840	0.705123	0.727548	0.715086	0.715847	0.709791	0.687165	0.727044	0.712733	0.703413	0.704194	0.714274	0.699134	0.722565	0.704975	0.709687	0.709857	0.720905
	860	0.702035	0.728509	0.712233	0.716494	0.709456	0.682287	0.725871	0.70857	0.702277	0.704013	0.71582	0.701276	0.725163	0.698272	0.695682	0.704784	0.716492
	880	0.69106	0.71989	0.69597	0.709587	0.703638	0.670041	0.721884	0.700506	0.698769	0.704817	0.709309	0.703246	0.71163	0.691551	0.698705	0.695673	0.715467
	900	0.684306	0.710706	0.694274	0.713715	0.710755	0.668323	0.7174	0.698342	0.696242	0.703492	0.716439	0.703406	0.713873	0.682574	0.696317	0.69075	0.704692
	920	0.679455	0.706917	0.694613	0.717157	0.709264	0.66833	0.708488	0.699446	0.701808	0.69138	0.71341	0.69454	0.710288	0.685921	0.698421	0.684662	0.69604
	940	0.682355	0.704728	0.697071	0.709406	0.699264	0.664082	0.709496	0.704282	0.699775	0.690204	0.704444	0.685504	0.705814	0.690713		0.688167	0.688504
	960	0.57749	0.578089	0.574161	0.582719	0.692737		0.711725									0.68569	0.691328
	980	0.578519	0.579989	0.576875	0.581005	0.683962		0.720685
	1000	0.574475	0.585234		0.580768	0.686726		0.721519
	1020	0.577467	0.582665			0.691444
	1040	0.573338	0.581751
	1060	0.572292	0.580607
	1080	0.572783
	normalized data to start
	microns	Col0_1	Col0_2	Col0_3	Col0_4	Col0_5	Col0_6	Col0_7	Col0_8	abp 1_1	abp 1_2	abp 1_3	abp 1_4	abp 1_5	abp 1_6	abp 1_7	abp 1_8	abp 1_9	abp 1_10
	0	1	1	1	1	1	1	1	1	1	1	1	1	1	1	1	1	1	1
	20	1.00649	1.01171	1.02947	0.989783	1.01128	1.02061	1.02443	1.01556	1.01683	0.999413	1.02207	1.02081	0.992223	1.0143	1.01875	1.00487	1.02548	1.02273
	40	1.0318	1.00921	1.04125	0.995481	1.02796	1.03588	1.03573	1.03218	1.02114	0.996975	1.03514	1.04243	0.999119	1.03579	1.03983	1.02452	1.04762	1.02255
	60	1.04804	1.01488	1.06085	1.02119	1.02953	1.02819	1.03642	1.05176	1.01896	0.995283	1.04025	1.06081	1.00122	1.02888	1.03329	1.0307	1.05523	1.027
	80	1.03501	1.04477	1.05835	1.03822	1.06788	1.02492	1.0399	1.03909	1.04674	1.03147	1.04502	1.06469	1.02885	1.02154	1.07304	1.02003	1.08049	1.03829
	100	1.04564	1.03804	1.0718	1.04938	1.10363	1.0694	1.04051	1.0736	1.06122	1.06259	1.05254	1.07105	1.07163	1.07088	1.11952	1.04129	1.08514	1.05491
	120	1.06652	1.05843	1.13487	1.06608	1.11449	1.08497	1.01717	1.10557	1.08291	1.05718	1.05669	1.06728	1.08858	1.09277	1.1234	1.10253	1.08236	1.07559
	140	1.08914	1.09306	1.15321	1.0786	1.11709	1.10361	1.05018	1.11214	1.09981	1.03181	1.04507	1.06813	1.07011	1.10513	1.1372	1.11047	1.12188	1.09008
	160	1.10557	1.10258	1.14871	1.07554	1.13731	1.12976	1.09017	1.12153	1.07117	1.04919	1.10423	1.10995	1.08804	1.11407	1.16095	1.11117	1.14453	1.10108
	180	1.11807	1.10894	1.14531	1.06722	1.1552	1.13812	1.10359	1.14322	1.0698	1.06636	1.13759	1.12457	1.10662	1.12112	1.1717	1.12202	1.15466	1.10317
	200	1.13389	1.12891	1.15729	1.10704	1.17955	1.15222	1.11661	1.15659	1.08435	1.08353	1.13927	1.12997	1.11706	1.12947	1.17643	1.12955	1.16449	1.11709
	220	1.12094	1.13053	1.15784	1.12788	1.1878	1.1534	1.11968	1.16187	1.09801	1.09002	1.14677	1.14226	1.1363	1.14252	1.18823	1.13965	1.17361	1.13377
	240	1.15064	1.13605	1.18072	1.12895	1.20104	1.18029	1.1356	1.2011	1.13524	1.09416	1.14946	1.15206	1.15024	1.16658	1.192	1.1696	1.18637	1.13353
	260	1.16102	1.16583	1.20422	1.1397	1.21404	1.19005	1.13581	1.2155	1.15445	1.09267	1.16194	1.15707	1.15158	1.18391	1.21908	1.18878	1.20077	1.12999
	280	1.19451	1.1777	1.22153	1.15694	1.21699	1.2075	1.15904	1.22278	1.15762	1.11491	1.17265	1.17042	1.13526	1.18904	1.22175	1.21688	1.22932	1.14293
	300	1.20053	1.1948	1.22067	1.16271	1.22112	1.20473	1.16494	1.21243	1.1386	1.13278	1.19334	1.17942	1.15184	1.18233	1.22831	1.22633	1.24662	1.16445
	320	1.20533	1.17877	1.21319	1.17682	1.21451	1.20421	1.1814	1.21162	1.15637	1.12699	1.19427	1.1874	1.14697	1.18443	1.23295	1.2199	1.25218	1.15072
	340	1.2035	1.16655	1.20852	1.19898	1.20612	1.19588	1.15961	1.20376	1.15285	1.13107	1.21375	1.18805	1.15011	1.17555	1.22106	1.22236	1.23771	1.15324
	360	1.17911	1.1521	1.18926	1.20442	1.17846	1.17405	1.14671	1.18419	1.17433	1.12977	1.20295	1.17188	1.14032	1.16759	1.2052	1.19602	1.23191	1.14807
	380	1.16882	1.12803	1.18032	1.18032	1.18102	1.15121	1.13589	1.16851	1.16639	1.11696	1.18756	1.17241	1.12521	1.1603	1.19346	1.17497	1.22317	1.13077
	400	1.1474	1.11438	1.17025	1.14578	1.17301	1.12787	1.10735	1.16205	1.16155	1.10219	1.16533	1.15541	1.10414	1.16074	1.19167	1.16413	1.22297	1.12073
	420	1.15418	1.09939	1.17219	1.12789	1.14866	1.14085	1.09674	1.16265	1.13366	1.0906	1.12726	1.13976	1.09196	1.14257	1.17862	1.15825	1.22635	1.08602
	440	1.13157	1.10847	1.14783	1.09528	1.12484	1.14064	1.09047	1.12776	1.10109	1.06699	1.10152	1.13185	1.0708	1.10836	1.16139	1.14634	1.23949	1.07259
	460	1.11457	1.08782	1.12049	1.08195	1.12746	1.12446	1.10094	1.10171	1.07567	1.06325	1.08668	1.1421	1.04183	1.10469	1.1518	1.12245	1.23019	1.06337
	480	1.11934	1.08007	1.11772	1.071	1.12795	1.11759	1.0818	1.09815	1.04898	1.06483	1.0846	1.12912	1.0534	1.1059	1.14382	1.12044	1.19168	1.05098
	500	1.10776	1.09076	1.12112	1.07168	1.10585	1.10746	1.06434	1.08949	1.04868	1.04602	1.06879	1.10753	1.05102	1.09646	1.13616	1.11295	1.17582	1.04468
	520	1.09175	1.0939	1.10405	1.0552	1.08894	1.08584	1.07416	1.08299	1.03006	1.04108	1.06393	1.09897	1.04385	1.07386	1.11428	1.09333	1.18642	1.02212
	540	1.07661	1.08549	1.08786	1.04135	1.09083	1.07392	1.06574	1.0642	1.0146	1.03765	1.06942	1.11119	1.04646	1.05348	1.10417	1.08461	1.17384	1.01446
	560	1.05879	1.07907	1.07069	1.04821	1.09079	1.0752	1.05965	1.05575	1.01457	1.02978	1.05568	1.10117	1.03544	1.03902	1.1073	1.06274	1.14782	1.02067
	580	1.04301	1.06604	1.05686	1.0548	1.07539	1.07244	1.0438	1.05183	1.01152	1.02567	1.05122	1.08551	1.03375	1.02987	1.09942	1.04892	1.1286	1.0027
	600	1.03938	1.06022	1.05182	1.04312	1.06499	1.08243	1.05017	1.04708	0.999445	1.02013	1.04773	1.07168	1.02531	1.01662	1.08586	1.04534	1.12213	0.997062
	620	1.02305	1.05108	1.04274	1.03371	1.06243	1.07925	1.0521	1.04534	0.983759	1.01427	1.02989	1.05992	1.02361	1.00484	1.07104	1.04203	1.10657	0.996597
	640	1.00351	1.04135	1.03916	1.02572	1.05305	1.06712	1.05112	1.03352	0.976472	1.01373	1.02135	1.05178	1.02736	0.997484	1.06588	1.02975	1.09167	0.998784
	660	1.01238	1.02924	1.03273	1.01053	1.05289	1.05204	1.04811	1.03585	0.964807	1.00839	1.02505	1.03982	1.02172	1.00689	1.07065	1.02566	1.08467	0.991943
	680	1.01959	1.03911	1.04892	1.01382	1.03748	1.0368	1.03428	1.04137	0.958477	0.994335	1.01992	1.03289	1.02179	1.00011	1.05576	1.03515	1.06863	0.989329
	700	1.00576	1.04515	1.03406	1.01409	1.03749	1.03496	1.03651	1.02399	0.949169	0.984924	1.0095	1.02407	1.01189	0.988243	1.05127	1.02288	1.07582	0.978595
	720	0.992205	1.03001	1.014	1.01445	1.0469	1.02449	1.04535	1.02307	0.944897	0.994547	1.02099	1.03038	1.01798	0.971175	1.0491	1.01195	1.06785	0.976895
	740	0.982982	1.01589	1.01143	1.00851	1.05628	1.01977	1.03546	1.01686	0.950721	0.987401	1.02533	1.02811	1.01303	0.970925	1.05085	1.00086	1.05041	0.965687
	760	0.983454	1.00742	1.01433	1.01396	1.0379	1.01621	1.03042	1.01353	0.959162	0.975286	1.01518	1.01451	1.00107	0.971439	1.04471	0.998494	1.03753	0.947373
	780	0.979953	1.01281	1.0145	1.00403	1.0351	1.00686	1.03049	1.00144	0.942032	0.972953	1.00308	1.00229	0.990811	0.969968	1.0399	1.00098	1.03282	0.938201
	800	0.978533	1.0132	1.00208	1.00132	1.02993	1.00887	1.02975	0.997962	0.938957	0.978822	0.998783	0.995677	0.9865	0.963358	1.03395	1.00071	1.03246	0.928044
	820	0.979675	1.00646	1.0056	0.996572	1.02843	1.007	1.03313	0.998987	0.938333	0.971783	1.00416	0.995868	0.994045	0.96347	1.02478	0.998372	1.02721	0.926551
	840	0.976498	1.00219	0.998465	0.998188	1.02246	1.0008	1.03638	1.00282	0.92902	0.965648	1.00172	0.991361	0.995595	0.973324	1.01528	0.995494	1.03031
	860	0.972221	1.00352	0.994481	0.999089	1.02198	0.993699	1.03471	0.996967	0.927519	0.9654	1.00389	0.994398	0.999176	0.96407	0.995241	0.988379	1.024
	880	0.957023	0.991646	0.971774	0.989458	1.0136	0.975862	1.02903	0.985622	0.922886	0.966503	0.994757	0.997191	0.980528	0.95479	0.999566	0.975603	1.02253
	900	0.947669	0.978995	0.969405	0.995215	1.02385	0.973361	1.02264	0.982576	0.919549	0.964686	1.00476	0.997418	0.983619	0.942396	0.996149	0.968698	1.00713
	920	0.94095	0.973776	0.969878	1.00001	1.0217	0.973371	1.00993	0.98413	0.9269	0.948076	1.00051	0.984847	0.978679	0.947017	0.999158	0.960161	0.99477
	940	0.944967	0.97076	0.97331	0.989206	1.00729	0.967184	1.01137	0.990934	0.924216	0.946464	0.987933	0.972034	0.972515	0.953633		0.965076	0.983999

## Sheet: S41-f
	Experiment 5 th May combined Col0 and tmk1 and tmk4
	microns	Col0_9	Col0_10	Col0_11	Col0_12	Col0_13	Col0_14	Col0_15	Col0_16	Col0_17	Col0_18	tmk1_4	tmk1_5	tmk1_6	tmk1_7	tmk1_8	tmk1_9	tmk1_10	tmk1_11	tmk1_12	tmk1_13	tmk4_5	tmk4_6	tmk4_7	tmk4_8	tmk4_9	tmk4_10	tmk4_11	tmk4_12	tmk4_13	tmk4_14
	0	0.647542	0.637599	0.629621	0.642658	0.633484	0.626685	0.631329	0.63361	0.628015	0.634107	0.62839	0.637511	0.62874	0.63949	0.647929	0.635086	0.635008	0.641848	0.646608	0.645585	0.643394	0.634574	0.637047	0.642486	0.648432	0.62743	0.612115	0.634832	0.63225	0.626435
	20	0.669038	0.639006	0.630296	0.640002	0.634648	0.632104	0.627708	0.63749	0.636029	0.635204	0.627986	0.644637	0.636497	0.671885	0.649726	0.638598	0.639215	0.642851	0.645566	0.653039	0.643353	0.635342	0.635898	0.654138	0.649824	0.636735	0.608765	0.640672	0.635321	0.624612
	40	0.635244	0.640616	0.633137	0.645193	0.634956	0.636629	0.634074	0.636674	0.643398	0.644153	0.631408	0.647446	0.63907	0.6478	0.651112	0.6405	0.641607	0.650995	0.650014	0.656968	0.655274	0.637735	0.632014	0.654882	0.651682	0.634587	0.608056	0.648006	0.639842	0.624446
	60	0.638313	0.643547	0.633293	0.655116	0.641153	0.640644	0.637556	0.641957	0.645846	0.646014	0.639077	0.648313	0.641071	0.650628	0.655407	0.64296	0.645126	0.661462	0.655546	0.667468	0.656004	0.646167	0.643024	0.662037	0.658518	0.634341	0.61026	0.649667	0.642886	0.631145
	80	0.638587	0.646928	0.639642	0.660767	0.648224	0.646209	0.641157	0.644193	0.643959	0.647496	0.64394	0.654361	0.649321	0.654631	0.662253	0.641739	0.645499	0.665601	0.651406	0.667797	0.663273	0.659445	0.646283	0.662002	0.666215	0.639117	0.607088	0.64271	0.64361	0.629756
	100	0.641467	0.6501	0.655741	0.666303	0.652216	0.648933	0.655734	0.652351	0.647526	0.64514	0.649535	0.653327	0.653954	0.660296	0.669128	0.647197	0.650169	0.664351	0.654414	0.677477	0.666511	0.657719	0.652601	0.664966	0.661788	0.641143	0.611077	0.638178	0.648139	0.625636
	120	0.639966	0.659318	0.655295	0.672264	0.654331	0.647833	0.65747	0.658872	0.657721	0.654648	0.656565	0.665922	0.657675	0.663034	0.672654	0.65512	0.652142	0.666251	0.656776	0.684422	0.672492	0.658585	0.658518	0.672363	0.66355	0.649191	0.608792	0.641839	0.65173	0.628761
	140	0.653124	0.66714	0.65506	0.679189	0.654979	0.654686	0.66151	0.660829	0.663138	0.664249	0.661253	0.67327	0.665	0.669328	0.672937	0.662301	0.649087	0.677322	0.659406	0.689073	0.671081	0.661358	0.659063	0.676619	0.670588	0.648382	0.610181	0.655932	0.650615	0.635322
	160	0.658132	0.674987	0.659079	0.682661	0.663185	0.661863	0.664022	0.65944	0.669875	0.669895	0.664261	0.679613	0.669942	0.674341	0.68048	0.664111	0.656619	0.68151	0.66286	0.693593	0.673548	0.660753	0.657248	0.680499	0.667988	0.650436	0.611255	0.659904	0.653174	0.638091
	180	0.665827	0.681757	0.662454	0.681448	0.669466	0.669491	0.669443	0.662376	0.672191	0.673613	0.666466	0.683187	0.676378	0.682756	0.687166	0.669295	0.665276	0.689384	0.667152	0.692723	0.671711	0.664852	0.653486	0.687596	0.66998	0.650648	0.61534	0.659559	0.650793	0.644055
	200	0.670184	0.681912	0.661969	0.684529	0.672149	0.668749	0.669344	0.665691	0.672033	0.675069	0.664437	0.684031	0.676654	0.685023	0.694531	0.671154	0.667124	0.696276	0.671961	0.690792	0.66797	0.668748	0.657553	0.695139	0.674736	0.656046	0.62445	0.655792	0.653891	0.650237
	220	0.671117	0.68651	0.665434	0.683902	0.673023	0.667402	0.667163	0.669214	0.673675	0.678613	0.673301	0.686677	0.677268	0.691615	0.695461	0.676498	0.66979	0.705316	0.66992	0.70012	0.673064	0.67307	0.65915	0.699058	0.674957	0.659772	0.63295	0.662375	0.655714	0.649954
	240	0.6776	0.683158	0.671744	0.697157	0.672217	0.669397	0.667809	0.671529	0.677441	0.680445	0.685047	0.695544	0.680491	0.694844	0.697639	0.680037	0.666512	0.706497	0.668862	0.71004	0.678426	0.674368	0.666972	0.699012	0.677482	0.661923	0.63775	0.674636	0.653268	0.651307
	260	0.684436	0.68703	0.671018	0.70304	0.675289	0.676438	0.66913	0.67379	0.680002	0.68298	0.690902	0.694297	0.686378	0.693007	0.706413	0.687936	0.673896	0.711323	0.675232	0.714337	0.686558	0.675036	0.672283	0.706011	0.678987	0.664444	0.642579	0.677164	0.638182	0.651011
	280	0.690016	0.696195	0.676483	0.705115	0.67665	0.674257	0.676402	0.678551	0.686893	0.686292	0.69189	0.705065	0.691178	0.691534	0.711079	0.693667	0.676817	0.717818	0.683701	0.716435	0.688112	0.677055	0.673608	0.714299	0.677669	0.658403	0.649212	0.684394	0.645009	0.656485
	300	0.686844	0.701603	0.682116	0.7068	0.677716	0.67292	0.68028	0.682989	0.683712	0.687732	0.695104	0.699586	0.695469	0.691193	0.711629	0.695043	0.67828	0.722062	0.688023	0.717797	0.693016	0.683149	0.674748	0.717986	0.674566	0.667763	0.661641	0.683719	0.641543	0.668872
	320	0.690127	0.705227	0.688201	0.714355	0.678149	0.677753	0.678825	0.687828	0.684652	0.686351	0.697515	0.694858	0.695485	0.700091	0.71059	0.698039	0.685728	0.727715	0.694866	0.724108	0.699821	0.684518	0.677573	0.724931	0.677638	0.676666	0.663386	0.684998	0.63899	0.665445
	340	0.698983	0.709063	0.689523	0.716688	0.678919	0.676331	0.680261	0.692096	0.689323	0.683865	0.705359	0.697751	0.695159	0.700975	0.711708	0.703643	0.686237	0.735351	0.688202	0.730165	0.703436	0.689635	0.680264	0.727618	0.676306	0.673438	0.667884	0.692476	0.649574	0.66204
	360	0.690027	0.702516	0.687075	0.716225	0.679043	0.683551	0.666694	0.695048	0.687672	0.674466	0.705481	0.697623	0.695243	0.694099	0.717414	0.704954	0.682112	0.73794	0.691265	0.732228	0.69892	0.683253	0.679821	0.724824	0.675863	0.673839	0.670476	0.696849	0.647679	0.659671
	380	0.691153	0.70135	0.685486	0.719845	0.673342	0.672672	0.657738	0.69961	0.690661	0.66693	0.701275	0.6935	0.693969	0.690575	0.714996	0.707608	0.687462	0.732589	0.692259	0.735532	0.695673	0.682387	0.687168	0.726413	0.67879	0.6738	0.671306	0.684564	0.650431	0.654713
	400	0.688654	0.693916	0.675406	0.732327	0.665024	0.656235	0.650335	0.699903	0.692433	0.654682	0.698562	0.690732	0.680392	0.676069	0.709523	0.69598	0.688671	0.720773	0.69167	0.739373	0.698373	0.691078	0.685122	0.730692	0.679167	0.672045	0.664366	0.668532	0.645627	0.648353
	420	0.678579	0.683254	0.663031	0.712143	0.658026	0.648325	0.641734	0.699217	0.688832	0.641294	0.688756	0.680672	0.678398	0.66226	0.698167	0.688067	0.685837	0.714111	0.690475	0.747602	0.693872	0.692105	0.676935	0.730569	0.687917	0.667856	0.652438	0.669512	0.647667	0.656904
	440	0.667694	0.685765	0.65319	0.705065	0.650182	0.638279	0.629604	0.691709	0.682057	0.63172	0.683103	0.668241	0.671191	0.648849	0.68807	0.680405	0.677894	0.7026	0.687779	0.744096	0.690382	0.685653	0.672922	0.730007	0.68837	0.66345	0.643773	0.670559	0.645603	0.653208
	460	0.656822	0.673473	0.639983	0.691214	0.638574	0.629451	0.616788	0.680035	0.672146	0.621384	0.677149	0.660031	0.662203	0.639365	0.678654	0.670947	0.6782	0.685185	0.68206	0.737018	0.681195	0.678501	0.666025	0.720873	0.682452	0.661905	0.624931	0.663869	0.640992	0.652724
	480	0.648855	0.657827	0.63004	0.676687	0.629857	0.625631	0.610473	0.666636	0.663786	0.613721	0.662041	0.649383	0.648438	0.632619	0.664878	0.65306	0.662312	0.674512	0.676785	0.72955	0.677151	0.668507	0.652124	0.713428	0.675219	0.653359	0.626231	0.661264	0.635911	0.641686
	500	0.64634	0.652033	0.624177	0.663359	0.621504	0.621917	0.606001	0.656849	0.652892	0.607712	0.649276	0.636369	0.637651	0.627835	0.659941	0.644562	0.647643	0.661972	0.664523	0.722941	0.669726	0.657365	0.649927	0.702087	0.674604	0.64254	0.617514	0.651653	0.627933	0.632634
	520	0.639633	0.643911	0.617841	0.64807	0.617658	0.615091	0.600583	0.649324	0.641246	0.610149	0.644001	0.635417	0.630041	0.629014	0.652724	0.637032	0.638569	0.651354	0.661505	0.713458	0.663596	0.648549	0.644409	0.691797	0.671093	0.627064	0.624914	0.646749	0.62023	0.624307
	540	0.622461	0.631721	0.607522	0.636139	0.610433	0.614498	0.594412	0.637251	0.633748	0.598476	0.631285	0.629306	0.625022	0.619206	0.646807	0.634575	0.636912	0.64059	0.652971	0.703758	0.651091	0.63644	0.633978	0.682771	0.663459	0.615714	0.619171	0.648009	0.617958	0.62127
	560	0.619831	0.625642	0.607109	0.628911	0.608892	0.610433	0.588794	0.630643	0.62832	0.591775	0.626258	0.623893	0.620542	0.612961	0.641321	0.626976	0.636576	0.635111	0.647471	0.691338	0.648231	0.630934	0.631751	0.672426	0.657345	0.60897	0.609282	0.635866	0.613819	0.613617
	580	0.617681	0.622202	0.602701	0.622439	0.600508	0.603147	0.585487	0.623124	0.620173	0.589242	0.620604	0.616794	0.618666	0.608695	0.63674	0.612944	0.635536	0.631241	0.641405	0.675792	0.639526	0.624989	0.619283	0.657312	0.65183	0.606924	0.602381	0.624761	0.612651	0.606785
	600	0.612791	0.619906	0.601616	0.617343	0.599989	0.600405	0.583361	0.612818	0.615511	0.588196	0.616519	0.613979	0.612719	0.605926	0.633602	0.610851	0.628659	0.622416	0.63762	0.661447	0.630578	0.620485	0.613945	0.654393	0.64813	0.602337	0.599121	0.620836	0.60704	0.603815
	620	0.609572	0.617468	0.600194	0.611266	0.60296	0.599896	0.580487	0.609751	0.615442	0.583941	0.613462	0.611712	0.611012	0.602831	0.627941	0.608445	0.629751	0.614576	0.62839	0.650697	0.625759	0.615227	0.61614	0.644566	0.640757	0.598091	0.594249	0.613422	0.603347	0.602316
	640	0.607071	0.615906	0.60205	0.607577	0.598956	0.595244	0.577531	0.607281	0.612419	0.582235	0.608602	0.611242	0.607975	0.599514	0.624653	0.606318	0.621481	0.611267	0.620807	0.644258	0.617423	0.611879	0.612053	0.645457	0.638104	0.594805	0.588385	0.611959	0.600724	0.603041
	660	0.602523	0.606599	0.599412	0.606614	0.599998	0.595344	0.576071	0.601859	0.610375	0.580569	0.609569	0.606347	0.606525	0.592499	0.621633	0.599145	0.617335	0.607362	0.622096	0.634514	0.614514	0.608863	0.608133	0.639307	0.634874	0.595651	0.578987	0.608743	0.595022	0.602266
	680	0.600156	0.607731	0.590046	0.600365	0.599213	0.594164	0.578076	0.594316	0.609234	0.575757	0.613193	0.603037	0.606269	0.594178	0.62032	0.597493	0.618308	0.60171	0.619487	0.631313	0.606505	0.59782	0.603364	0.628511	0.631757	0.593967	0.570976	0.60427	0.592746	0.60111
	700	0.598569	0.608054	0.593705	0.601202	0.593783	0.591093	0.572707	0.596259	0.602119	0.57533	0.604942	0.603332	0.604553	0.591284	0.61722	0.600698	0.612468	0.599183	0.613984	0.622317	0.606417	0.597181	0.602031	0.632578	0.623641	0.591601	0.570252	0.6012	0.590551	0.595915
	720	0.595081	0.605455	0.593228	0.597746	0.593572	0.592998	0.570612	0.592338	0.596986	0.575371	0.59999	0.599821	0.603447	0.592979	0.614796	0.595995	0.613763	0.593096	0.609651	0.61659	0.600171	0.597136	0.596293	0.620108	0.6221	0.588163	0.567429	0.597557	0.586111	0.588219
	740	0.592959	0.59752	0.590968	0.59527	0.592429	0.59417	0.568274	0.584913	0.599832	0.575915	0.603882	0.59505	0.60118	0.587604	0.614957	0.588965	0.60884	0.592702	0.613579	0.616941	0.600526	0.592796	0.594842	0.614566	0.620631	0.586371	0.561932	0.593811	0.580922	0.587675
	760	0.591519	0.594808	0.588373	0.593758	0.593244	0.594591	0.570063	0.582473	0.591976	0.572219	0.599922	0.59384	0.596101	0.589379	0.610373	0.584622	0.601443	0.58857	0.605801	0.613861	0.595115	0.589839	0.595953	0.614066	0.619189	0.581261	0.561809	0.587802	0.58202	0.584867
	780	0.591359	0.592746	0.589061	0.593326	0.592581	0.590506	0.563317	0.582802	0.586813	0.572017	0.595513	0.596966	0.593929	0.58845	0.621578	0.587357	0.599469	0.58668	0.602359	0.607719	0.592952	0.58903	0.588613	0.605452	0.614768	0.579359	0.558013	0.589632	0.576473	0.584206
	800	0.589189	0.596543	0.584459	0.591496	0.586576	0.588744	0.565049	0.576486	0.587921	0.571988	0.593981	0.591471	0.594261	0.58279	0.602936	0.580778	0.595095	0.586954	0.598912	0.602364	0.585269	0.588366	0.586864	0.608451	0.610705	0.576389	0.560281	0.591764	0.576318	0.58268
	820	0.587167	0.591955	0.581359	0.591535	0.588051	0.588484	0.562883	0.572266	0.588961	0.568602	0.589706	0.592245	0.59055	0.585804	0.601586	0.587851	0.59386	0.582849	0.594252	0.601317	0.584768	0.582125	0.58545	0.596522	0.609742	0.576522	0.5591	0.585641	0.571438	0.5839
	840	0.586257	0.5931	0.578405	0.589067	0.585322	0.589025	0.559276	0.568947	0.58467	0.568831	0.585027	0.585616	0.58541	0.582303	0.597037	0.582964	0.592081	0.581378	0.590321	0.599017	0.579863	0.573913	0.579461	0.591568	0.606552	0.573669	0.553695	0.584618	0.569586	0.578486
	860	0.587319	0.597143	0.578782	0.584678	0.583908	0.585199	0.556864	0.567886	0.58516	0.570972	0.584642	0.585644	0.588459	0.579084	0.595322	0.581967	0.592426	0.580181	0.588598	0.595432	0.577781	0.573856	0.57674	0.585206	0.598901	0.573348	0.550598		0.572303	0.580035
	880	0.579343	0.590379	0.57643	0.580422	0.588065	0.589423	0.559789	0.563192	0.575875	0.571819	0.574824	0.583466	0.589684	0.579632	0.593194	0.579792	0.593169	0.583399	0.587857	0.591057	0.574842	0.57217	0.564634	0.587952	0.598241	0.573277				0.575159
	900	0.580051	0.584284	0.579003	0.586587	0.585673	0.585379	0.561431	0.562607	0.576779	0.567262	0.578534	0.584019	0.59104	0.577606	0.592153	0.577919	0.591407	0.575824	0.584761	0.592343	0.575965	0.570585	0.566104	0.585528	0.596093	0.56901
	920	0.57915	0.584145	0.579634	0.58447	0.581953	0.587576	0.55926	0.561002	0.575178	0.568319	0.575784	0.588035	0.591873	0.575195	0.587285	0.571978	0.588644		0.584725	0.588642	0.570749	0.564929	0.569527	0.58945	0.595947	0.568473
	940	0.575204	0.581496	0.575678	0.581445	0.579198	0.583819	0.55309	0.559408	0.572014	0.570129	0.578152	0.585248	0.586939	0.578271	0.586117	0.571767				0.588366	0.573268	0.561805	0.571798	0.582755	0.591416
	960	0.57749	0.578089	0.574161	0.582719		0.583741	0.553489		0.572787		0.578248	0.581475	0.579585	0.572747							0.569101	0.562153	0.568813	0.583176	0.588722
	980	0.578519	0.579989	0.576875	0.581005		0.580479	0.550732		0.566243		0.571297	0.577367	0.58281	0.572502							0.564049		0.566174	0.579291	0.588598
	1000	0.574475	0.585234		0.580768			0.552404				0.572865			0.573085
	1020	0.577467	0.582665
	1040	0.573338	0.581751
	1060	0.572292	0.580607
	1080	0.572783
	microns	Col0_9	Col0_10	Col0_11	Col0_12	Col0_13	Col0_14	Col0_15	Col0_16	Col0_17	Col0_18	tmk1_4	tmk1_5	tmk1_6	tmk1_7	tmk1_8	tmk1_9	tmk1_10	tmk1_11	tmk1_12	tmk1_13	tmk4_5	tmk4_6	tmk4_7	tmk4_8	tmk4_9	tmk4_10	tmk4_11	tmk4_12	tmk4_13	tmk4_14
	0	1	1	1	1	1	1	1	1	1	1	1	1	1	1	1	1	1	1	1	1	1	1	1	1	1	1	1	1	1	1
	20	1.0332	1.00221	1.00107	0.995867	1.00184	1.00865	0.994265	1.00612	1.01276	1.00173	0.999356	1.01118	1.01234	1.05066	1.00277	1.00553	1.00663	1.00156	0.998387	1.01155	0.999936	1.00121	0.998196	1.01814	1.00215	1.01483	0.994527	1.0092	1.00486	0.99709
	40	0.981009	1.00473	1.00558	1.00394	1.00232	1.01587	1.00435	1.00484	1.0245	1.01584	1.0048	1.01558	1.01643	1.013	1.00491	1.00852	1.01039	1.01425	1.00527	1.01763	1.01847	1.00498	0.9921	1.01929	1.00501	1.01141	0.993368	1.02075	1.01201	0.996825
	60	0.985748	1.00933	1.00583	1.01938	1.01211	1.02227	1.00986	1.01317	1.02839	1.01878	1.01701	1.01694	1.01961	1.01742	1.01154	1.0124	1.01593	1.03056	1.01382	1.0339	1.0196	1.01827	1.00938	1.03043	1.01555	1.01102	0.996968	1.02337	1.01682	1.00752
	80	0.986171	1.01463	1.01592	1.02818	1.02327	1.03115	1.01557	1.0167	1.02539	1.02111	1.02474	1.02643	1.03273	1.02368	1.02211	1.01047	1.01652	1.03701	1.00742	1.03441	1.0309	1.03919	1.0145	1.03038	1.02743	1.01863	0.991787	1.01241	1.01797	1.0053
	100	0.990619	1.01961	1.04148	1.03679	1.02957	1.0355	1.03866	1.02958	1.03107	1.0174	1.03365	1.02481	1.0401	1.03254	1.03272	1.01907	1.02388	1.03506	1.01207	1.0494	1.03593	1.03647	1.02442	1.03499	1.0206	1.02186	0.998304	1.00527	1.02513	0.998724
	120	0.9883	1.03406	1.04078	1.04607	1.03291	1.03374	1.04141	1.03987	1.0473	1.03239	1.04484	1.04457	1.04602	1.03682	1.03816	1.03154	1.02698	1.03802	1.01572	1.06016	1.04523	1.03784	1.0337	1.0465	1.02332	1.03468	0.99457	1.01104	1.03081	1.00371
	140	1.00862	1.04633	1.0404	1.05684	1.03393	1.04468	1.04781	1.04296	1.05593	1.04753	1.0523	1.05609	1.05767	1.04666	1.0386	1.04285	1.02217	1.05527	1.01979	1.06736	1.04303	1.04221	1.03456	1.05313	1.03417	1.03339	0.99684	1.03324	1.02905	1.01419
	160	1.01635	1.05864	1.04679	1.06224	1.04689	1.05613	1.05178	1.04077	1.06666	1.05644	1.05708	1.06604	1.06553	1.0545	1.05024	1.0457	1.03403	1.06179	1.02513	1.07436	1.04687	1.04126	1.03171	1.05917	1.03016	1.03667	0.998594	1.03949	1.0331	1.01861
	180	1.02824	1.06926	1.05215	1.06036	1.0568	1.0683	1.06037	1.0454	1.07034	1.0623	1.06059	1.07165	1.07577	1.06766	1.06056	1.05387	1.04767	1.07406	1.03177	1.07301	1.04401	1.04771	1.0258	1.07021	1.03323	1.03701	1.00527	1.03895	1.02933	1.02813
	200	1.03497	1.0695	1.05138	1.06515	1.06104	1.06712	1.06021	1.05063	1.07009	1.0646	1.05736	1.07297	1.07621	1.0712	1.07193	1.05679	1.05058	1.0848	1.03921	1.07002	1.0382	1.05385	1.03219	1.08195	1.04057	1.04561	1.02015	1.03302	1.03423	1.038
	220	1.03641	1.07671	1.05688	1.06418	1.06242	1.06497	1.05676	1.05619	1.07271	1.07019	1.07147	1.07712	1.07718	1.08151	1.07336	1.06521	1.05477	1.09888	1.03605	1.08447	1.04612	1.06067	1.0347	1.08805	1.04091	1.05155	1.03404	1.04339	1.03711	1.03754
	240	1.04642	1.07145	1.0669	1.0848	1.06114	1.06816	1.05778	1.05985	1.0787	1.07307	1.09016	1.09103	1.08231	1.08656	1.07672	1.07078	1.04961	1.10072	1.03442	1.09984	1.05445	1.06271	1.04698	1.08798	1.0448	1.05498	1.04188	1.0627	1.03324	1.0397
	260	1.05698	1.07753	1.06575	1.09396	1.06599	1.07939	1.05987	1.06341	1.08278	1.07707	1.09948	1.08907	1.09167	1.08369	1.09026	1.08322	1.06124	1.10824	1.04427	1.10649	1.06709	1.06376	1.05531	1.09887	1.04712	1.05899	1.04977	1.06668	1.00938	1.03923
	280	1.06559	1.0919	1.07443	1.09718	1.06814	1.07591	1.07139	1.07093	1.09375	1.0823	1.10105	1.10596	1.09931	1.08138	1.09746	1.09224	1.06584	1.11836	1.05736	1.10974	1.0695	1.06694	1.05739	1.11177	1.04509	1.04937	1.0606	1.07807	1.02018	1.04797
	300	1.06069	1.10038	1.08338	1.09981	1.06982	1.07378	1.07754	1.07793	1.08869	1.08457	1.10617	1.09737	1.10613	1.08085	1.09831	1.09441	1.06814	1.12497	1.06405	1.11185	1.07713	1.07655	1.05918	1.11751	1.0403	1.06428	1.08091	1.07701	1.0147	1.06774
	320	1.06577	1.10607	1.09304	1.11156	1.07051	1.08149	1.07523	1.08557	1.09019	1.08239	1.11	1.08995	1.10616	1.09477	1.09671	1.09912	1.07987	1.13378	1.07463	1.12163	1.0877	1.07871	1.06362	1.12832	1.04504	1.07847	1.08376	1.07902	1.01066	1.06227
	340	1.07944	1.11208	1.09514	1.11519	1.07172	1.07922	1.07751	1.09231	1.09762	1.07847	1.12249	1.09449	1.10564	1.09615	1.09843	1.10795	1.08067	1.14568	1.06433	1.13101	1.09332	1.08677	1.06784	1.1325	1.04299	1.07333	1.09111	1.0908	1.0274	1.05684
	360	1.06561	1.10181	1.09125	1.11447	1.07192	1.09074	1.05602	1.09697	1.09499	1.06365	1.12268	1.09429	1.10577	1.0854	1.10724	1.11001	1.07418	1.14971	1.06906	1.13421	1.0863	1.07671	1.06714	1.12815	1.0423	1.07397	1.09534	1.09769	1.0244	1.05306
	380	1.06735	1.09998	1.08873	1.1201	1.06292	1.07338	1.04183	1.10416	1.09975	1.05176	1.11599	1.08782	1.10375	1.07988	1.10351	1.11419	1.0826	1.14137	1.0706	1.13933	1.08126	1.07535	1.07868	1.13063	1.04682	1.07391	1.0967	1.07834	1.02876	1.04514
	400	1.06349	1.08833	1.07272	1.13953	1.04979	1.04715	1.03011	1.10463	1.10257	1.03245	1.11167	1.08348	1.08215	1.0572	1.09506	1.09588	1.08451	1.12297	1.06969	1.14528	1.08545	1.08904	1.07547	1.13729	1.0474	1.07111	1.08536	1.05309	1.02116	1.03499
	420	1.04793	1.0716	1.05306	1.10812	1.03874	1.03453	1.01648	1.10355	1.09684	1.01133	1.09606	1.0677	1.07898	1.03561	1.07754	1.08342	1.08004	1.11259	1.06784	1.15802	1.07846	1.09066	1.06261	1.1371	1.06089	1.06443	1.06587	1.05463	1.02438	1.04864
	440	1.03112	1.07554	1.03743	1.09711	1.02636	1.0185	0.997269	1.0917	1.08605	0.996236	1.08707	1.0482	1.06752	1.01464	1.06195	1.07136	1.06754	1.09465	1.06367	1.15259	1.07303	1.08049	1.05631	1.13622	1.06159	1.05741	1.05172	1.05628	1.02112	1.04274
	460	1.01433	1.05626	1.01646	1.07555	1.00804	1.00441	0.976967	1.07327	1.07027	0.979934	1.07759	1.03532	1.05322	0.999805	1.04742	1.05647	1.06802	1.06752	1.05483	1.14163	1.05875	1.06922	1.04549	1.12201	1.05247	1.05495	1.02094	1.04574	1.01383	1.04197
	480	1.00203	1.03172	1.00067	1.05295	0.994275	0.998317	0.966965	1.05212	1.05696	0.96785	1.05355	1.01862	1.03133	0.989257	1.02616	1.0283	1.043	1.05089	1.04667	1.13006	1.05247	1.05348	1.02367	1.11042	1.04131	1.04133	1.02306	1.04164	1.00579	1.02435
	500	0.998143	1.02264	0.991353	1.03221	0.981089	0.992391	0.959882	1.03668	1.03961	0.958375	1.03324	0.998208	1.01417	0.981776	1.01854	1.01492	1.0199	1.03135	1.02771	1.11982	1.04093	1.03592	1.02022	1.09277	1.04036	1.02408	1.00882	1.0265	0.993172	1.0099
	520	0.987787	1.0099	0.98129	1.00842	0.975018	0.981499	0.951299	1.0248	1.02107	0.962217	1.02484	0.996715	1.00207	0.983619	1.0074	1.00306	1.00561	1.01481	1.02304	1.10513	1.0314	1.02202	1.01156	1.07675	1.03495	0.999418	1.02091	1.01877	0.980988	0.996603
	540	0.961269	0.990781	0.964901	0.989855	0.963613	0.980553	0.941525	1.00575	1.00913	0.943809	1.00461	0.98713	0.994087	0.968282	0.998268	0.999196	1.003	0.99804	1.00984	1.09011	1.01196	1.00294	0.995183	1.0627	1.02317	0.981327	1.01153	1.02076	0.977395	0.991755
	560	0.957206	0.981246	0.964245	0.978608	0.96118	0.974067	0.932627	0.995317	1.00049	0.933241	0.996606	0.978638	0.986962	0.958516	0.989801	0.98723	1.00247	0.989504	1.00133	1.07087	1.00752	0.994264	0.991687	1.0466	1.01375	0.97058	0.99537	1.00163	0.970849	0.979538
	580	0.953886	0.975852	0.957244	0.968538	0.947945	0.96244	0.927388	0.983451	0.987514	0.929247	0.98761	0.967503	0.983978	0.951845	0.98273	0.965135	1.00083	0.983474	0.991953	1.04679	0.993989	0.984896	0.972115	1.02308	1.00524	0.967319	0.984098	0.984137	0.969002	0.968632
	600	0.946335	0.972251	0.95552	0.960609	0.947126	0.958066	0.924021	0.967186	0.98009	0.927597	0.981108	0.963088	0.97452	0.947515	0.977887	0.96184	0.990002	0.969724	0.9861	1.02457	0.980081	0.977799	0.963736	1.01853	0.999535	0.960008	0.978771	0.977954	0.960127	0.963891
	620	0.941363	0.968426	0.953262	0.951152	0.951816	0.957252	0.919469	0.962345	0.979981	0.920887	0.976244	0.959532	0.971804	0.942675	0.96915	0.958051	0.991721	0.957511	0.971824	1.00792	0.972591	0.969512	0.967181	1.00324	0.988164	0.953239	0.970813	0.966275	0.954286	0.961498
	640	0.9375	0.965977	0.956209	0.945412	0.945495	0.949829	0.914787	0.958446	0.975167	0.918197	0.968509	0.958795	0.966974	0.937488	0.964077	0.954703	0.978697	0.952355	0.960097	0.997944	0.959634	0.964237	0.960766	1.00462	0.984072	0.948003	0.961232	0.96397	0.950138	0.962655
	660	0.930477	0.95138	0.95202	0.943914	0.94714	0.94999	0.912474	0.949889	0.971912	0.915569	0.970049	0.951117	0.964667	0.926518	0.959415	0.943408	0.972168	0.946271	0.962091	0.982851	0.955114	0.959483	0.954613	0.995053	0.979091	0.94935	0.945879	0.958906	0.941119	0.961419
	680	0.926821	0.953155	0.937145	0.93419	0.945901	0.948105	0.915649	0.937985	0.970095	0.907981	0.975816	0.945924	0.96426	0.929145	0.957388	0.940806	0.973701	0.937465	0.958056	0.977892	0.942666	0.942081	0.947126	0.97825	0.974284	0.946667	0.932791	0.951858	0.937519	0.959573
	700	0.924372	0.953661	0.942956	0.935491	0.93733	0.943205	0.907145	0.941051	0.958766	0.907306	0.962684	0.946387	0.961532	0.924619	0.952604	0.945853	0.964505	0.933528	0.949545	0.963958	0.942529	0.941074	0.945035	0.984579	0.961769	0.942896	0.931609	0.947024	0.934048	0.951281
	720	0.918985	0.949586	0.942198	0.930115	0.936996	0.946245	0.903827	0.934863	0.950592	0.907372	0.954805	0.940879	0.959772	0.927269	0.948863	0.938447	0.966544	0.924044	0.942845	0.955087	0.93282	0.941004	0.936028	0.96517	0.959392	0.937416	0.926997	0.941284	0.927025	0.938995
	740	0.915708	0.93714	0.93861	0.926261	0.935192	0.948115	0.900124	0.923144	0.955124	0.908229	0.960998	0.933396	0.956166	0.918864	0.949111	0.927378	0.958791	0.923431	0.948919	0.955631	0.933373	0.934164	0.933749	0.956545	0.957126	0.93456	0.918016	0.935383	0.918818	0.938127
	760	0.913485	0.932887	0.934487	0.923909	0.936478	0.948788	0.902957	0.919293	0.942614	0.902401	0.954697	0.931498	0.948089	0.92164	0.942037	0.92054	0.947142	0.916993	0.936889	0.950859	0.924962	0.929505	0.935494	0.955766	0.954902	0.926417	0.917816	0.925919	0.920555	0.933643
	780	0.913237	0.929653	0.93558	0.923237	0.935431	0.942269	0.892272	0.919812	0.934394	0.902082	0.94768	0.936401	0.944635	0.920187	0.95933	0.924847	0.944034	0.914048	0.931567	0.941346	0.921601	0.92823	0.923971	0.942358	0.948084	0.923384	0.911614	0.9288	0.911781	0.932589
	800	0.909886	0.935607	0.928271	0.920389	0.925953	0.939458	0.895014	0.909844	0.936158	0.902036	0.945241	0.927782	0.945163	0.911337	0.930558	0.914486	0.937146	0.914475	0.926236	0.93305	0.909659	0.927183	0.921226	0.947026	0.941819	0.918651	0.915319	0.932159	0.911535	0.930152
	820	0.906763	0.928412	0.923347	0.92045	0.928282	0.939042	0.891584	0.903184	0.937814	0.896696	0.938439	0.928996	0.93926	0.916049	0.928476	0.925625	0.935201	0.908079	0.919029	0.931429	0.90888	0.917349	0.919006	0.928459	0.940333	0.918863	0.91339	0.922514	0.903817	0.932101
	840	0.905358	0.930207	0.918655	0.916609	0.923974	0.939905	0.885871	0.897945	0.930982	0.897057	0.930993	0.918598	0.931085	0.910575	0.921454	0.91793	0.932399	0.905787	0.91295	0.927867	0.901256	0.904408	0.909605	0.920749	0.935413	0.914317	0.90456	0.920903	0.900887	0.923458
	860	0.906998	0.936549	0.919254	0.90978	0.921741	0.933801	0.88205	0.896271	0.931761	0.900435	0.93038	0.918641	0.935934	0.90554	0.918808	0.91636	0.932943	0.903923	0.910286	0.922314	0.898021	0.904317	0.905334	0.910847	0.923614	0.913805	0.899501		0.905186	0.92593
	880	0.894681	0.92594	0.915519	0.903158	0.928303	0.94054	0.886684	0.888862	0.916977	0.90177	0.914757	0.915225	0.937883	0.906397	0.915524	0.912934	0.934113	0.908937	0.909138	0.915537	0.893452	0.901661	0.886331	0.915121	0.922596	0.913691				0.918147
	900	0.895773	0.916382	0.919606	0.91275	0.924528	0.934087	0.889284	0.887939	0.918416	0.894584	0.920661	0.916092	0.940039	0.90323	0.913917	0.909986	0.931338	0.897134	0.904351	0.917528	0.895199	0.899163	0.888638	0.911348	0.919284	0.906891
	920	0.894382	0.916163	0.920608	0.909456	0.918655	0.937594	0.885846	0.885406	0.915867	0.89625	0.916284	0.922392	0.941363	0.89946	0.906404	0.90063	0.926987		0.904295	0.911795	0.887091	0.890249	0.894011	0.917451	0.919059	0.906034
	940	0.888289	0.912008	0.914325	0.904749	0.914307	0.931598	0.876072	0.88289	0.910829	0.899104	0.920052	0.91802	0.933517	0.90427	0.904601	0.900298				0.911368	0.891005	0.885327	0.897576	0.907031	0.912071
