# Supplementary material for: The AUX1-AFB1-CNGC14 module establishes a longitudinal root surface pH profile
Source: eLife. 2023 Jul 14;12:e85193. doi: 10.7554/eLife.85193 (PMC10414970; doi:10.7554/eLife.85193)
Supplement: Figure 4—figure supplement 2—source data 1. [file elife-85193-fig4-figsupp2-data1.xlsx]

## Sheet: S4-2a
d	0	20	40	60	80	100	120	140	160	180	200	220	240	260	280	300	320	340	360	380	400	420	440	460	480	500	520	540	560	580	600	620	640	660	680	700	720	740	760	780	800
col_cm	1	1.01211	1.01933	1.02959	1.03683	1.03112	1.02739	1.03978	1.04465	1.04189	1.04381	1.04315	1.04667	1.04462	1.04655	1.05842	1.04254	1.04891	1.05081	1.04369	1.07093	1.0777	1.06953	1.07252	1.05402	1.03721	1.02228	1.01023	0.994567	0.984084	0.968513	0.960458	0.952127	0.936862	0.931737	0.919773	0.909655	0.906037	0.899088	0.894483	0.891266
col_cm	1	1.01892	1.02143	1.01581	1.02474	1.03807	1.03845	1.04108	1.04654	1.04838	1.04836	1.05272	1.0501	1.05099	1.05739	1.04789	1.04427	1.04011	1.0501	1.05333	1.04702	1.0417	1.04006	1.0516	1.05338	1.04312	1.02662	1.02091	1.00669	0.99612	0.983511	0.977908	0.974438	0.96064	0.955803	0.940486	0.937949	0.929862	0.918009	0.912262	0.901557
col_cm	1	0.982356	0.986063	0.985829	0.990693	1.00079	0.994096	0.962288	0.959957	0.978627	0.984117	0.990697	0.989565	0.991363	0.994111	0.99863	1.00448	0.993135	0.988115	0.986418	0.97963	0.975523	0.962794	0.961975	0.950217	0.942522	0.937511	0.923057	0.912256	0.910855	0.902105	0.889585	0.877254	0.876452	0.87613	0.859337	0.859213	0.855674	0.844895	0.841132	0.841979
col_cm	1	1.00605	1.00757	1.01049	1.01904	1.01966	1.02013	1.02246	1.03065	1.04007	1.03609	1.04061	1.0375	1.04345	1.05733	1.0584	1.06012	1.06156	1.0686	1.07948	1.07763	1.07363	1.06734	1.05817	1.0418	1.03623	1.02488	1.0122	1.00133	0.976756	0.96192	0.955684	0.93737	0.924613	0.911982	0.911423	0.910421	0.902362	0.895203	0.892008	0.88751
col_cm	1	0.997034	0.991791	0.996747	1.00627	1.00718	1.00536	1.01196	1.0134	1.01711	1.01354	1.02149	1.01811	1.02411	1.03297	1.04194	1.0426	1.03998	1.03096	1.03024	1.05108	1.04732	1.04504	1.03753	1.02419	1.01369	1.00247	0.982846	0.975485	0.965628	0.953566	0.940632	0.92671	0.92554	0.917534	0.899539	0.895738	0.88318	0.887303	0.887175	0.888609
col_cm	1	1.00303	1.00247	1.00911	1.01671	1.00211	1.00442	1.00837	1.00921	1.00574	1.01419	1.03208	1.04518	1.04903	1.05837	1.06076	1.05669	1.06761	1.06743	1.0564	1.03637	1.01946	1.01076	1.00245	0.975888	0.964205	0.953672	0.935384	0.927543	0.91486	0.909085	0.901693	0.892773	0.883217	0.872006	0.869032	0.860804	0.851861	0.850935	0.840918	0.841582
col_cm	1	0.980496	0.985465	0.976747	0.986639	0.99446	0.985849	0.987082	0.993982	0.998141	1.00373	1.015	1.01823	1.01941	1.02784	1.02544	1.02182	1.01668	1.01294	1.00341	0.995485	0.981779	0.970407	0.959038	0.948881	0.937043	0.92714	0.909212	0.892908	0.888334	0.883785	0.885301	0.875905	0.866707	0.862151	0.862593	0.854974	0.855412	0.852438	0.849034	0.849773
col_cm	1	1.03056	1.02624	1.02524	1.02028	1.01808	1.01276	1.01502	1.01268	1.01288	1.01793	1.02058	1.02843	1.03633	1.04543	1.0473	1.03861	1.03947	1.02744	1.01795	0.996029	0.984402	0.965055	0.949073	0.936505	0.925029	0.908841	0.893717	0.879573	0.870569	0.860775	0.852617	0.854293	0.855608	0.850505	0.851079	0.850219	0.849338	0.850697
col_cm	1	1.01903	1.0213	1.01861	1.02008	1.01301	1.00539	1.01679	1.02336	1.02622	1.02877	1.02953	1.02801	1.02855	1.03044	1.02676	1.02464	1.01962	1.0141	1.00386	0.987557	0.972385	0.94977	0.929519	0.919192	0.896757	0.889499	0.880705	0.865778	0.862937	0.857902	0.855372	0.846751	0.848031	0.846148	0.851115	0.854234	0.851284	0.861229	0.859027	0.867505
col_cm	1	0.972642	0.979976	0.976977	0.976499	0.974878	0.974288	0.970622	0.970511	0.975119	0.983702	0.994061	0.991878	0.994644	0.995984	0.998881	0.992528	0.988027	0.990205	0.987845	0.977421	0.964995	0.957673	0.94166	0.934871	0.926336	0.916642	0.90284	0.89605	0.8935	0.887137	0.875841	0.873646	0.871095	0.8657	0.857646	0.85738	0.858219	0.851381	0.854745	0.840477
col_cm	1	1.00282	1.00289	0.999484	0.994052	0.995533	0.998581	0.99519	0.985592	0.986797	0.985608	0.9746	0.986921	0.993793	0.994164	0.996963	1.00085	1.00604	0.998796	0.988043	0.975996	0.965209	0.940775	0.927523	0.91593	0.905712	0.893083	0.895718	0.888851	0.872833	0.860328	0.85834	0.850829	0.840337	0.836222	0.839345	0.836832	0.838935	0.834053	0.825778	0.820844
col_cm	1	0.986295	0.928612	0.943533	0.981347	0.99062	0.989587	0.991309	0.994094	0.997795	1.0016	1.00107	1.00082	1.01012	1.01928	1.02707	1.0313	1.04463	1.03972	1.02728	1.01892	1.00737	1.00545	0.987194	0.964597	0.953009	0.939815	0.915948	0.901547	0.889226	0.877696	0.869562	0.860536	0.856704	0.844459	0.84626	0.838644	0.835491	0.834238	0.827732	0.833634
col_cm	1	1.00234	1.0065	1.00337	1.00432	1.00746	1.0006	1.01069	1.00716	0.991675	0.998117	0.992036	0.996592	0.99246	0.998712	0.998376	1.00691	0.991777	0.980026	0.975702	0.983034	0.974627	0.96545	0.948757	0.928684	0.921362	0.916863	0.898297	0.888687	0.885813	0.873975	0.874847	0.876495	0.865926	0.862694	0.861923	0.863993	0.860687	0.856566	0.865231	0.861807
col_cm	1	0.991654	0.98326	0.982771	0.977302	0.95982	0.958634	0.960612	0.989012	0.987119	0.991556	0.986193	0.988326	1.00494	1.00038	1.00516	1.00477	1.00355	0.999873	0.994657	0.97789	0.968211	0.954743	0.941168	0.925001	0.911402	0.905804	0.904574	0.895436	0.890676	0.889177	0.877818	0.875037	0.87006	0.865263	0.866031	0.861294	0.860058	0.860386	0.863187	0.861081
col_cm	1	1.00241	1.01141	1.00371	1.00192	1.00555	0.99937	0.997258	0.988287	0.990348	0.991981	0.989271	0.995705	0.998943	1.00156	1.00475	0.995827	0.995999	0.990781	0.994755	0.982399	0.981938	0.97015	0.961663	0.953511	0.941063	0.933598	0.923839	0.908035	0.90426	0.895765	0.887262	0.87995	0.876792	0.867928	0.863014	0.860756	0.858596	0.852675	0.853019	0.848949
col_cm	1	0.999719	1.00145	1.00106	0.997684	0.992861	0.991671	0.991909	0.990547	0.990252	0.988344	0.979032	0.970262	0.958641	0.954334	0.948633	0.94212	0.921403	0.909426	0.897332	0.886381	0.87177	0.863897	0.857104	0.841866	0.84402	0.837346	0.841685	0.83545	0.835009	0.843652	0.839168	0.837179	0.842303	0.844003	0.847817	0.8395	0.83955	0.847202	0.840996
col_cm	1	0.992535	0.99471	0.999586	0.992776	0.99824	1.00161	0.990437	0.994156	1.00242	0.999655	1.00413	1.00963	1.00719	1.00604	1.00689	1.00526	1.00219	0.991335	0.974432	0.962037	0.940327	0.91862	0.91257	0.90813	0.900501	0.900027	0.89394	0.87896	0.876838	0.876418	0.875222	0.871347	0.864662	0.861617	0.852498	0.856833	0.860664	0.857	0.863306	0.869936
col_cm	1	1.01131	1.01868	1.01228	1.01909	1.03456	1.03256	1.03219	1.04288	1.0419	1.04162	1.05327	1.04409	1.0296	1.04289	1.03778	1.02714	1.0405	1.10739	1.11975	1.1055	1.07327	1.0576	1.07221	1.07134	1.06695	1.08009	1.09617	1.06011	1.03335	1.02023	1.0201	1.00476	0.980992	0.969203	0.956328	0.943329	0.929436	0.902454	0.892032	0.89271
col_cm	1	1.01765	1.03268	1.03786	1.03484	1.04132	1.0394	1.05723	1.05218	1.07321	1.08604	1.09324	1.09524	1.10006	1.09773	1.10128	1.09941	1.10424	1.12848	1.12379	1.12111	1.13175	1.13062	1.12272	1.12053	1.12291	1.09921	1.07956	1.05826	1.03412	1.0115	1.00578	0.988983	0.957334	0.945257	0.926708	0.9163	0.914913	0.913069	0.912151	0.906179
col_cm	1	0.94656	0.945305	0.950914	0.963114	0.969079	0.968337	0.964782	0.97671	0.981188	0.990164	0.992141	0.980136	0.986322	0.986663	0.996613	1.01348	1.01929	1.02257	1.02514	1.03732	1.03864	1.04317	1.03221	1.02228	0.996123	0.974186	0.956537	0.944942	0.940496	0.915623	0.895008	0.896408	0.888469	0.872315	0.865062	0.856552	0.852956	0.847225	0.83916	0.832897
col_cm	1	1.03776	1.04384	1.06179	1.07153	1.08075	1.082	1.05916	1.04252	1.07623	1.09064	1.09188	1.10065	1.11138	1.1087	1.11784	1.07881	1.06357	1.09281	1.09854	1.09443	1.08745	1.0698	1.04477	1.02965	1.0114	0.979855	0.96303	0.943909	0.941583	0.931643	0.920931	0.911484	0.891808	0.899365	0.889965	0.877038	0.867412	0.865986	0.863143	0.859309
col_cm	1	0.97716	0.99742	1.00803	1.00811	0.997807	0.992961	0.96522	0.990608	1.01364	1.02655	1.02004	1.03677	1.03982	1.0444	1.04191	1.03574	1.03493	1.04369	1.04828	1.04081	1.04228	1.03403	1.00641	0.997989	0.986784	0.969198	0.957917	0.945591	0.932046	0.917802	0.904463	0.893731	0.876527	0.874575	0.866036	0.853647	0.843117	0.835118	0.825465	0.833811
col_cm	1	0.990145	1.00178	1.0038	1.00832	1.01518	1.03749	1.04904	1.04215	1.04216	1.03655	1.02293	1.00389	0.979674	0.984988	1.00728	1.02432	1.02613	1.06054	1.06178	1.07051	1.06772	1.06536	1.05347	1.03079	1.02816	1.01318	0.998655	0.992431	0.979582	0.95916	0.943064	0.939617	0.927777	0.915801	0.899542	0.892179	0.883178	0.882826	0.880113	0.861578
col_cm	1	1.01972	1.02277	1.02775	1.03603	1.03795	1.03969	1.04318	1.06056	1.06862	1.06111	1.06594	1.06878	1.08152	1.07986	1.0827	1.10253	1.10872	1.12632	1.14032	1.16048	1.17103	1.1661	1.16539	1.14905	1.12401	1.11896	1.10451	1.08139	1.05169	1.04912	1.02249	1.00051	0.990031	0.975661	0.963025	0.957119	0.947147	0.937904	0.935942	0.930698
col_cm	1	0.999688	1.00889	1.01973	1.03083	1.0326	1.03756	1.04312	1.04893	1.06216	1.05552	1.06243	1.06767	1.01465	0.947222	0.987297	1.03327	1.08098	1.10919	1.11418	1.11486	1.11459	1.09524	1.07587	1.06804	1.06338	1.04777	1.0362	1.02073	0.991824	0.979218	0.958509	0.946172	0.931607	0.92176	0.910812	0.889822	0.884288	0.858505	0.850862	0.852459
afb1_cm	0.967231	0.972759	0.971801	0.972898	0.973956	0.967803	0.967808	0.956362	0.958463	0.961239	0.959814	0.962378	0.962684	0.967663	0.967224	0.970561	0.966715	0.958352	0.956425	0.946509	0.918133	0.936403	0.938494	0.931407	0.921517	0.91592	0.911505	0.913346	0.904747	0.894774	0.890365	0.886819	0.872526	0.873378	0.862818	0.861465	0.858449	0.846228	0.849054	0.849928	0.848067
afb1_cm	0.917317	0.919011	0.919183	0.918322	0.921367	0.922757	0.927839	0.920535	0.920216	0.912934	0.913276	0.910012	0.912329	0.912769	0.913543	0.916967	0.915226	0.917864	0.92064	0.919342	0.918064	0.90923	0.902031	0.901956	0.894832	0.891762	0.888636	0.884625	0.866324	0.85194	0.852718	0.8439	0.842482	0.82821	0.827319	0.823193	0.826458	0.82231	0.819231	0.818932	0.816654
afb1_cm	0.932784	0.934797	0.942211	0.937497	0.937244	0.928731	0.933293	0.930355	0.92674	0.922553	0.920803	0.91509	0.886235	0.898554	0.9155	0.921962	0.916797	0.904213	0.898004	0.899316	0.899227	0.891394	0.884747	0.881195	0.877304	0.862285	0.856943	0.858857	0.849429	0.848866	0.839924	0.8358	0.83229	0.829469	0.820584	0.824974	0.824265	0.815007	0.812286	0.809734	0.807414
afb1_cm	0.946427	0.951574	0.940255	0.946092	0.955026	0.946914	0.943887	0.945258	0.947298	0.941391	0.94793	0.939365	0.926706	0.925892	0.923505	0.927331	0.934667	0.939495	0.945375	0.934873	0.924353	0.925381	0.916134	0.91388	0.905306	0.897096	0.895595	0.881684	0.877467	0.866685	0.864254	0.860689	0.856891	0.853447	0.849235	0.846962	0.838684	0.835281	0.835333	0.839187	0.831366
afb1_cm	0.948419	0.952495	0.951773	0.947191	0.950326	0.943417	0.929202	0.923322	0.927302	0.940509	0.928391	0.931888	0.950201	0.948103	0.950862	0.954543	0.952823	0.948488	0.94088	0.930872	0.929736	0.922469	0.914405	0.910994	0.901155	0.890861	0.888283	0.879097	0.870759	0.872422	0.86483	0.853026	0.853138	0.856526	0.852359	0.850378	0.852142	0.845636	0.843037	0.845119	0.838688
afb1_cm	0.951237	0.95589	0.945861	0.953358	0.942994	0.938818	0.947932	0.952124	0.959196	0.967674	0.972045	0.973857	0.972371	0.977995	0.977249	0.968616	0.965197	0.967008	0.960028	0.950209	0.930962	0.925232	0.919024	0.912443	0.901868	0.899709	0.888955	0.878794	0.876996	0.872631	0.870298	0.866782	0.862047	0.861217	0.855336	0.865129	0.856159	0.856819	0.854996	0.842395	0.846257
afb1_cm	0.987995	0.991004	0.98751	0.987564	0.979826	0.979433	0.967466	0.960667	0.952392	0.945515	0.948722	0.955113	0.96167	0.960055	0.968439	0.957526	0.957171	0.949677	0.934742	0.924902	0.911159	0.898428	0.894507	0.889757	0.878189	0.869165	0.867178	0.866103	0.864355	0.857733	0.849293	0.846005	0.843704	0.846807	0.84289	0.840663	0.836833	0.833771	0.834872	0.834326	0.832853
afb1_cm	0.985316	0.93713	0.971829	0.978256	0.98108	0.980661	0.977373	0.97913	0.976849	0.979455	0.979014	0.981967	0.992361	0.989638	0.986587	0.979744	0.966599	0.959285	0.953101	0.942329	0.931494	0.928142	0.913287	0.903002	0.895642	0.889935	0.881459	0.883459	0.869006	0.86783	0.853683	0.850839	0.847511	0.842291	0.837273	0.846051	0.841934	0.848898	0.84839	0.845168	0.85302
afb1_cm	0.96951	0.973933	0.972264	0.969267	0.969471	0.96603	0.967005	0.958849	0.952446	0.971153	0.976548	0.97644	0.981722	0.975246	0.97528	0.961906	0.961867	0.949804	0.935374	0.921219	0.914458	0.90317	0.892252	0.879525	0.867127	0.857696	0.848079	0.837401	0.831556	0.827566	0.826473	0.825688	0.822765	0.826723	0.831767	0.828332	0.824669	0.829719	0.83134	0.830217	0.823422
afb1_cm	0.964413	0.959559	0.958572	0.952976	0.952345	0.951467	0.954954	0.964707	0.963624	0.956695	0.964928	0.97003	0.97601	0.980211	0.98128	0.978621	0.978809	0.981781	0.976108	0.96428	0.954516	0.952676	0.945048	0.937946	0.928154	0.919775	0.911255	0.893239	0.888906	0.884133	0.873969	0.864373	0.855557	0.854815	0.859623	0.847109	0.847826	0.844158	0.846831	0.848643	0.847627
afb1_cm	0.979182	0.989281	0.991686	0.986149	0.982836	0.975694	0.967405	0.970997	0.959944	0.95299	0.95564	0.952402	0.962346	0.962703	0.963269	0.96508	0.969305	0.97009	0.961018	0.954472	0.951205	0.963367	0.958726	0.951689	0.948134	0.942312	0.931749	0.908721	0.903344	0.904945	0.900378	0.893919	0.887509	0.886245	0.883895	0.880478	0.876386	0.867827	0.867803	0.86833	0.858445
afb1_cm	0.98611	0.978681	0.977031	0.979566	0.982679	0.979017	0.976228	0.981215	0.977286	0.969058	0.95805	0.93716	0.969141	0.974909	0.970845	0.971365	0.967682	0.967425	0.962262	0.961592	0.964815	0.958856	0.947901	0.941263	0.925533	0.920465	0.908467	0.890709	0.892377	0.88904	0.880588	0.873572	0.873062	0.873423	0.868279	0.859766	0.854299	0.854312	0.848162	0.846957	0.845241
afb1_cm	0.964538	0.976028	0.972506	0.970809	0.970969	0.969975	0.967817	0.951597	0.955174	0.9501	0.942806	0.972137	0.966211	0.966619	0.972958	0.969891	0.968901	0.964086	0.962119	0.960633	0.952925	0.949162	0.945435	0.935414	0.927835	0.921207	0.908689	0.903162	0.895339	0.888349	0.881345	0.871962	0.865749	0.86013	0.85475	0.852303	0.853863	0.845319	0.842417	0.841574	0.843309
afb1_cm	0.956136	0.957381	0.960988	0.959433	0.956746	0.947232	0.951578	0.948801	0.940659	0.957077	0.957223	0.950682	0.951062	0.96129	0.968355	0.963824	0.958215	0.95782	0.958887	0.952046	0.952889	0.947996	0.934678	0.919272	0.913677	0.900167	0.890513	0.891185	0.881723	0.877017	0.868648	0.861319	0.852798	0.844114	0.841645	0.847677	0.840256	0.833098	0.828116	0.829932	0.82949
afb1_cm	0.982498	0.983194	0.978937	0.969316	0.970041	0.956109	0.955326	0.956399	0.949124	0.946738	0.928121	0.935702	0.929647	0.934966	0.92993	0.930752	0.925221	0.932953	0.932211	0.928967	0.924676	0.922129	0.920516	0.912031	0.905929	0.900213	0.894379	0.891822	0.882873	0.868355	0.860219	0.857798	0.853596	0.841603	0.843857	0.836049	0.832674	0.833335	0.840384	0.842304	0.841133
afb1_cm	0.985972	0.978663	0.973063	0.982467	0.989862	0.981576	0.985252	0.986532	0.987617	0.981032	0.979416	0.979887	0.972029	0.967036	0.965496	0.969086	0.969402	0.976094	0.96992	0.959892	0.96362	0.954201	0.94579	0.934818	0.928405	0.914299	0.907012	0.886248	0.866169	0.86513	0.864161	0.849731	0.835246	0.834427	0.822739	0.827244	0.819655	0.813411	0.806946	0.805528	0.804815
afb1_cm	0.990375	0.985927	0.992851	1.00137	1.01322	1.0105	1.00485	1.00906	1.00421	0.999104	0.994833	1.00221	0.998114	0.995975	0.9985	1.00322	1.00698	0.998947	0.997873	0.994936	0.99133	0.981959	0.945633	0.95969	0.974707	0.967114	0.962642	0.95537	0.944781	0.927854	0.911327	0.905724	0.897358	0.884097	0.874334	0.864794	0.853588	0.850899	0.83285	0.832382	0.836357
afb1_cm	0.984478	0.984087	0.989754	0.985459	0.981373	0.988161	0.988769	0.996585	1.00307	1.00365	1.01409	1.01156	1.01421	1.01286	1.02002	1.02534	1.02149	1.01975	1.01683	1.00948	1.00941	1.00935	1.00478	0.991366	0.988586	0.975624	0.959832	0.957188	0.951808	0.93652	0.930204	0.91675	0.900542	0.884813	0.873826	0.853175	0.844366	0.850382	0.847886	0.842651	0.844683
afb1_cm	0.984492	0.99019	0.986266	0.988686	0.987461	0.988554	0.992457	1.00035	0.997625	0.991842	0.986706	0.993213	0.981645	0.991868	0.997717	1.0035	1.00677	1.00368	0.994846	0.985475	0.976929	0.97968	0.978667	0.96742	0.962808	0.953033	0.957602	0.937731	0.928242	0.913251	0.911958	0.904244	0.887955	0.878848	0.858859	0.849943	0.854808	0.839763	0.837475	0.824647	0.82265
afb1_cm	0.94682	0.964057	0.968792	0.972938	0.970903	0.964166	0.957772	0.965341	0.959011	0.952187	0.965165	0.950204	0.942858	0.945311	0.937868	0.921261	0.941127	0.951216	0.942624	0.96202	0.964079	0.960473	0.95263	0.946566	0.943386	0.941887	0.940539	0.922638	0.904585	0.917015	0.902811	0.89127	0.882022	0.871454	0.861564	0.855666	0.844618	0.83502	0.838408	0.838617	0.825298
afb1ox_cm	0.980671	0.976972	0.986007	0.988292	0.990779	0.992216	0.992626	0.994629	0.991107	0.987517	0.986533	0.979813	0.977639	0.992072	1.00558	1.015	1.01764	1.01852	1.01856	1.01701	1.00209	0.989856	0.975883	0.976893	0.963994	0.95188	0.946307	0.936002	0.923138	0.920815	0.913774	0.897179	0.888043	0.885507	0.875982	0.869888	0.872486	0.86407	0.85722	0.852097	0.84978
afb1ox_cm	1.00207	1.00493	1.02393	1.02813	1.03519	1.03945	1.04814	1.05904	1.0772	1.0738	1.08302	1.09372	1.08267	1.06958	1.05344	1.04801	1.02426	1.00341	0.980304	0.956487	0.938625	0.917165	0.901286	0.890766	0.886113	0.870818	0.869361	0.855765	0.856473	0.859856	0.855824	0.853481	0.863184	0.854322	0.848072	0.854577	0.856201	0.856337	0.85952	0.867191	0.862814
afb1ox_cm	0.997619	1.00381	1.00656	1.01407	1.01592	1.02454	1.02685	1.02085	1.03241	1.03114	1.03687	1.04115	1.05525	1.0661	1.07225	1.07989	1.08647	1.10093	1.09676	1.09415	1.07891	1.07135	1.05403	1.02592	1.00357	0.990777	0.976823	0.967218	0.949429	0.925388	0.91438	0.901296	0.892525	0.880224	0.877772	0.869713	0.856246	0.855249	0.848091	0.849293	0.843538
afb1ox_cm	0.983998	0.988656	0.988912	0.999989	1.00449	1.00962	1.01348	1.01247	1.01702	1.01177	1.00343	1.00996	1.01053	1.00528	0.999193	1.00288	0.998095	0.981297	0.969091	0.96019	0.942777	0.932913	0.917324	0.905259	0.882011	0.871949	0.871536	0.84779	0.839443	0.836841	0.824405	0.821606	0.821911	0.809989	0.808821	0.806167	0.807508
afb1ox_cm	0.990985	0.997964	1.00345	0.997872	1.01141	1.0165	1.01964	1.01927	1.02218	1.01855	1.01311	1.02622	1.02829	1.03377	1.04492	1.04767	1.0449	1.04774	1.05206	1.05758	1.06334	1.04727	1.0434	1.03935	1.02331	1.00801	0.993538	0.9769	0.960286	0.943089	0.933145	0.925405	0.919407	0.909998	0.89318	0.882293	0.871844	0.860078	0.855557	0.869749	0.867973
afb1ox_cm	1.0681	1.08316	1.07563	1.07981	1.08554	1.08299	1.07693	1.08592	1.09561	1.09604	1.09556	1.09735	1.09758	1.10652	1.11266	1.12256	1.12615	1.1338	1.14642	1.15901	1.15799	1.1605	1.15216	1.14882	1.13835	1.12371	1.11724	1.09791	1.07842	1.06608	1.06089	1.04437	1.02166	1.01081	0.992815	0.987227	0.969855	0.962439	0.949585	0.945189	0.943335
afb1ox_cm	1.07764	1.08276	1.08383	1.08663	1.09517	1.10153	1.0985	1.11922	1.11952	1.11636	1.11537	1.12258	1.11932	1.12814	1.1463	1.15676	1.16813	1.17266	1.171	1.15626	1.15986	1.1551	1.14478	1.13951	1.12219	1.09885	1.08326	1.06291	1.04707	1.0317	1.01608	1.01006	1.00047	0.978678	0.970797	0.958078	0.951296	0.94412	0.935605	0.932954	0.929597
afb1ox_cm	1.00937	1.01381	1.02085	1.01379	1.01234	1.01747	1.01843	1.01914	1.03033	1.03503	1.03951	1.0494	1.04126	1.04698	1.05848	1.05629	1.06156	1.05872	1.05133	1.04778	1.02723	1.01841	1.01319	1.00639	1.0005	0.994234	0.981061	0.968404	0.971432	0.966726	0.951879	0.93275	0.919386	0.915068	0.908945	0.897022	0.891516	0.885288	0.87528	0.868914	0.860946
afb1ox_cm	1.07213	1.06842	1.07028	1.08243	1.08804	1.0952	1.08775	1.08352	1.08533	1.08755	1.10345	1.08147	1.08123	1.09871	1.09988	1.06368	1.11362	1.14476	1.14164	1.11982	1.10402	1.08508	1.06181	1.05532	1.05147	1.03159	1.02194	1.00483	0.990491	0.978492	0.972155	0.96325	0.962949	0.953188	0.939952	0.924694	0.922983	0.908869	0.899635	0.899407	0.901234
afb1ox_cm	1.0549	1.06534	1.06225	1.06161	1.05512	1.05594	1.05684	1.07257	1.07179	1.07332	1.08562	1.08684	1.09776	1.10572	1.11866	1.13271	1.14453	1.16067	1.16223	1.16197	1.16209	1.15643	1.13477	1.11623	1.08877	1.07368	1.06736	1.05267	1.04977	1.04025	1.02519	1.00116	0.98653	0.977457	0.974585	0.957145	0.94121	0.937649	0.929234	0.924307	0.912943
afb1ox_cm	1.11368	1.10492	1.11395	1.11723	1.1248	1.13081	1.13147	1.13763	1.14047	1.13541	1.14632	1.14789	1.16453	1.16891	1.17409	1.18465	1.19879	1.20877	1.21054	1.21828	1.20724	1.20019	1.19566	1.19174	1.17471	1.15056	1.14264	1.11695	1.08977	1.056	1.03931	1.02234	1.00899	0.991239	0.980397	0.970488	0.961474	0.96125	0.958816	0.955297	0.954085
afb1ox_cm	0.973601	0.977331	0.986134	0.990436	0.957679	0.964763	0.994006	1.02598	1.04738	1.06583	1.08439	1.09042	1.08777	1.07614	1.05891	1.03729	1.0244	0.995679	0.981628	0.965492	0.937941	0.912768	0.908083	0.901157	0.894447	0.891154	0.885896	0.881294	0.87308	0.866339	0.859241	0.854911	0.858366	0.860851	0.855831	0.86258	0.859529	0.859818	0.872887	0.866807	0.85459
afb1ox_cm	0.967507	0.973406	0.967514	0.976047	0.975066	0.984752	0.999326	0.998724	1.00798	1.01468	1.02011	1.03143	1.03886	1.04376	1.0531	1.0625	1.05907	1.06045	1.0378	1.02597	1.02536	1.01814	1.00877	0.997588	0.977799	0.972802	0.954087	0.922448	0.908711	0.908753	0.904283	0.89603	0.884047	0.871879	0.868494	0.872188	0.863373	0.858778	0.860361	0.868781	0.870974
afb1ox_cm	0.977438	0.995883	0.999435	1.01069	1.00867	1.02153	1.02584	1.02735	1.02759	1.04302	1.05057	1.05527	1.07383	1.09432	1.1018	1.11389	1.11031	1.11124	1.00828	1.00942	1.10415	1.09938	1.08405	1.06205	1.02908	1.0215	1.00076	0.997106	0.983446	0.971208	0.96371	0.955002	0.940798	0.916188	0.900173	0.894346	0.882462	0.877134	0.869919	0.871215	0.86943
afb1ox_cm	0.98197	0.977135	0.96896	0.969806	0.999738	1.00393	1.01682	1.0067	0.997694	1.01651	1.01167	1.03095	1.04484	1.05445	1.05172	1.07089	1.08595	1.09873	1.10906	1.10675	1.10518	1.0966	1.09311	1.07816	1.07346	1.07283	1.05412	1.03808	1.0413	1.01395	0.996187	0.980989	0.966326	0.950171	0.953774	0.943741	0.935831	0.930563	0.925141	0.910622	0.907889
afb1ox_cm	1.00289	0.997602	1.00203	1.00814	1.00159	1.00508	0.986798	0.967287	0.974354	0.961266	0.993237	1.02171	1.02967	1.04748	1.05208	1.0524	1.0708	1.09524	1.08839	1.0982	1.08876	1.08276	1.06723	1.05815	1.0387	1.02803	1.00953	0.996516	0.97277	0.964732	0.947313	0.930188	0.926228	0.923923	0.922823	0.914133	0.906101	0.90086	0.89781	0.892125	0.882773
afb1ox_cm	0.96994	0.974831	0.9693	0.983488	0.980641	0.97524	0.960923	0.975991	0.984192	0.983235	0.992024	1.0036	1.02409	1.04565	1.06374	1.06853	1.07301	1.07594	1.08143	1.08491	1.08366	1.08808	1.07609	1.06508	1.0547	1.04135	1.04048	1.02909	1.01893	1.00854	0.985878	0.972645	0.966913	0.949482	0.941123	0.936814	0.936227	0.919269	0.903895	0.905025	0.894048
afb1ox_cm	0.976635	0.977895	0.965581	0.967943	0.965961	0.969821	0.974998	0.994773	0.998598	0.997191	1.01419	1.02496	1.03665	1.05814	1.0758	1.08284	1.08573	1.08945	1.09175	1.09726	1.09149	1.07644	1.05815	1.04367	1.041	1.01596	1.00096	0.98461	0.965097	0.953667	0.933819	0.937976	0.920299	0.911509	0.90457	0.878596	0.868662	0.875462	0.876166	0.879194	0.871606
afb1ox_cm	0.992319	1.00011	1.00789	1.01266	1.00587	1.0079	1.00737	1.00525	1.01377	1.02947	1.03135	1.0353	1.04287	1.05928	1.0466	1.03223	1.05032	1.04992	1.04634	1.04163	1.00619	1.00918	1.0047	1.00026	0.994408	0.986256	0.977746	0.962938	0.958993	0.944582	0.940556	0.941152	0.941423	0.924529	0.92477	0.925097	0.924464	0.92357	0.92709	0.938105	0.92322

## Sheet: S4-2b
d	0	20	40	60	80	100	120	140	160	180	200	220	240	260	280	300	320	340	360	380	400	420	440	460	480	500	520	540	560	580	600	620	640	660	680	700	720	740	760	780	800
col_cm	1.01134	1.02264	1.02834	1.04259	1.05185	1.06272	1.07488	1.08306	1.09322	1.10222	1.10977	1.11608	1.13237	1.14234	1.15545	1.1542	1.15769	1.1615	1.15539	1.14778	1.13543	1.11525	1.09425	1.06908	1.05239	1.03155	1.01629	1.00218	0.988709	0.970806	0.956334	0.94864	0.940375	0.929941	0.918101	0.906299	0.897724	0.895329	0.888799	0.880066	0.875722
col_cm	0.996718	1.00548	1.01242	1.01755	1.02591	1.03633	1.03479	1.05885	1.07141	1.06636	1.08752	1.10348	1.11332	1.11317	1.11488	1.1069	1.09419	1.08201	1.06904	1.05261	1.03399	1.01745	0.995958	0.982441	0.968326	0.95308	0.936834	0.929581	0.920566	0.912095	0.906537	0.900271	0.890397	0.88845	0.883625	0.880297	0.879632	0.869917	0.863243	0.862232	0.862146
col_cm	1.01627	1.02765	1.03462	1.04325	1.05414	1.07081	1.07779	1.08604	1.09496	1.10616	1.1126	1.11715	1.12483	1.13731	1.15411	1.16131	1.17055	1.1775	1.18733	1.18967	1.18297	1.17145	1.15544	1.12443	1.10331	1.09773	1.08422	1.06666	1.05222	1.03918	1.02403	1.01312	0.993677	0.978514	0.969013	0.955994	0.951602	0.941972	0.933761	0.925371	0.917654
col_cm	1.00212	1.01085	1.02002	1.03221	1.04496	1.05521	1.06525	1.07522	1.07913	1.08822	1.09259	1.09808	1.10561	1.11366	1.1214	1.12763	1.13419	1.13624	1.13441	1.1221	1.10491	1.08675	1.06755	1.04353	1.02176	1.00963	0.994428	0.978843	0.967272	0.95506	0.94502	0.935698	0.924911	0.914101	0.911694	0.902248	0.894013	0.886539	0.881931	0.880726	0.877932
col_cm	0.973561	0.980158	0.98871	0.996999	1.00932	1.01615	1.02185	1.02928	1.03718	1.04397	1.05008	1.05508	1.06001	1.06449	1.06271	1.06235	1.05763	1.04282	1.02768	1.00673	0.984105	0.967636	0.956106	0.947319	0.931246	0.918149	0.91324	0.904416	0.898424	0.89326	0.887961	0.883786	0.879599	0.873743	0.869271	0.866363	0.862585	0.855523	0.851698	0.854142	0.852832
col_cm	0.972058	0.976739	0.979572	0.981836	0.987672	0.99354	0.991893	0.995216	0.997715	1.00194	1.00634	1.01292	1.02313	1.03443	1.03848	1.03622	1.04247	1.04428	1.03421	1.0311	1.01945	1.00521	0.989942	0.978841	0.962866	0.945988	0.934553	0.918404	0.903567	0.889061	0.875565	0.866615	0.861097	0.858789	0.854282	0.845266	0.834759	0.832253	0.828047	0.827669	0.820973
col_cm	0.993445	0.996957	1.0029	1.006	1.00606	1.01385	1.01303	1.01018	1.01334	1.02995	1.04655	1.06454	1.07915	1.10003	1.11539	1.12441	1.12796	1.13057	1.11854	1.10599	1.09705	1.07134	1.0482	1.0235	1.00092	0.978123	0.953274	0.932074	0.91813	0.904852	0.888493	0.875245	0.868532	0.861221	0.857429	0.846827	0.839873	0.835918	0.826602	0.823634	0.816448
col_cm	1.01544	1.01937	1.03	1.0322	1.03793	1.04693	1.05183	1.05367	1.06567	1.07306	1.07891	1.08597	1.09533	1.11701	1.1424	1.1605	1.17121	1.17971	1.18331	1.18171	1.17143	1.1573	1.12822	1.08827	1.0669	1.02875	1.00314	0.981615	0.955459	0.940644	0.928541	0.915967	0.903306	0.883886	0.867872	0.853362	0.849819	0.840285	0.840154	0.836899	0.825441
col_cm	1.00851	1.009	1.0119	1.01709	1.01699	1.02413	1.02757	1.02773	1.0283	1.02615	1.03044	1.03301	1.03819	1.05302	1.06227	1.07007	1.09392	1.10981	1.10318	1.10778	1.11206	1.11327	1.10598	1.09288	1.07092	1.04791	1.02237	0.998555	0.969595	0.938204	0.919011	0.905114	0.891744	0.879252	0.867014	0.858521	0.85091	0.840854	0.832558	0.829559	0.819356
col_cm	0.984317	0.971634	0.97167	0.974331	0.968978	0.974042	0.986867	1.00095	1.0041	1.01482	1.02672	1.03535	1.045	1.05423	1.06461	1.07615	1.07673	1.05716	1.03076	0.998892	0.976109	0.953915	0.93087	0.913953	0.893549	0.877756	0.865552	0.857007	0.84786	0.841411	0.838578	0.832362	0.82546	0.82083	0.810992	0.812326	0.807418	0.81017	0.811409	0.80515	0.803638
col_cm	1.02193	1.02822	1.02725	1.03597	1.03647	1.03893	1.0434	1.04111	1.04759	1.05022	1.05729	1.0618	1.06582	1.07782	1.08808	1.09706	1.10293	1.10814	1.10572	1.09635	1.09116	1.07545	1.05011	1.02694	1.0087	0.984388	0.967368	0.955668	0.940762	0.931677	0.91963	0.907975	0.899688	0.890192	0.888211	0.877851	0.872688	0.867797	0.868028	0.866098	0.863143
col_cm	1.00756	1.01243	1.01836	1.01995	1.0226	1.02505	1.0179	1.02565	1.03259	1.03314	1.03905	1.04112	1.04865	1.05555	1.06261	1.07877	1.09132	1.10766	1.11628	1.12321	1.13856	1.14772	1.14587	1.12997	1.10848	1.08383	1.06441	1.04034	1.02239	0.991243	0.975243	0.968399	0.954368	0.945954	0.933819	0.926249	0.914573	0.912144	0.908857	0.893812	0.886211
col_cm	0.996726	1.00405	0.999294	0.998763	0.995876	0.989139	0.995399	0.99295	0.997511	0.997482	0.994004	0.990529	0.997727	1.01792	1.0213	1.02867	1.04186	1.0464	1.05392	1.0617	1.0574	1.05078	1.04587	1.0273	1.01901	1.00253	0.982291	0.96954	0.957286	0.941599	0.930772	0.921846	0.907891	0.901398	0.890048	0.885876	0.872397	0.866991	0.858327	0.844397	0.84063
cngc14-1_cm	0.945581	0.950169	0.955998	0.956191	0.965604	0.967444	0.971204	0.970285	0.971284	0.971223	0.969158	0.967857	0.970856	0.976471	0.980948	0.983377	0.980458	0.964886	0.950546	0.934151	0.91643	0.900455	0.882442	0.867524	0.856966	0.847515	0.835082	0.828234	0.823151	0.820936	0.816899	0.813922	0.809996	0.811993	0.818646	0.816195	0.81441	0.820065	0.824892	0.826667	0.831287
cngc14-1_cm	0.945841	0.95335	0.965453	0.971738	0.975351	0.980137	0.979541	0.983977	0.990742	0.992055	0.993561	0.995497	0.998575	0.992451	0.98435	0.97314	0.964834	0.949468	0.940195	0.921503	0.903291	0.895151	0.891611	0.890665	0.884198	0.879602	0.877972	0.873447	0.868624	0.873685	0.866597	0.868473	0.866616	0.861142	0.848639	0.845701	0.846519	0.843583	0.846266	0.842302	0.842038
cngc14-1_cm	0.964132	0.968558	0.968397	0.971896	0.973334	0.971677	0.969665	0.980296	0.982741	0.990988	0.993201	0.999026	1.00756	1.00937	1.01223	1.01898	1.02243	1.02149	1.01792	1.01099	0.997768	0.983754	0.97584	0.953969	0.938179	0.920186	0.904206	0.89107	0.878481	0.866923	0.86296	0.858516	0.855561	0.845526	0.84107	0.842527	0.843515	0.839899	0.845186	0.843775	0.844063
cngc14-1_cm	0.989121	0.990954	0.990489	0.991242	0.99017	0.994145	1.00223	1.01194	1.0155	1.00239	1.00907	1.01897	1.0179	1.03687	1.04732	1.04768	1.05099	1.0587	1.06909	1.0664	1.062	1.05648	1.04252	1.02934	1.01354	0.990322	0.964299	0.936054	0.911134	0.895228	0.879177	0.863641	0.854133	0.843878	0.842875	0.838581	0.831489	0.831663	0.838753	0.837444	0.830047
cngc14-1_cm	0.999896	1.00631	1.00888	1.01341	1.0227	1.01799	1.02252	1.0246	1.02534	1.02944	1.03477	1.04813	1.0418	1.04363	1.03564	1.02674	1.01601	1.00181	0.983045	0.961432	0.946349	0.94006	0.9267	0.913665	0.906069	0.904653	0.895594	0.890499	0.883934	0.882203	0.888064	0.886945	0.892002	0.893574	0.89722	0.89959	0.89738	0.901665	0.905947	0.913769	0.918296
cngc14-1_cm	1.01812	1.02522	1.02845	1.03025	1.03058	1.0408	1.04831	1.05378	1.05729	1.05658	1.06145	1.06545	1.05854	1.05331	1.04039	1.02625	1.01365	0.995954	0.98413	0.963745	0.95037	0.940856	0.922162	0.91263	0.905558	0.902975	0.895004	0.898894	0.899836	0.896752	0.897855	0.90043	0.90463	0.908182	0.909719	0.914676	0.925269	0.927272	0.934265	0.928721	0.933256
cngc14-1_ox_cm	1.01166	1.02415	1.03421	1.0465	1.0579	1.07562	1.09013	1.10917	1.12382	1.13646	1.13934	1.14255	1.16721	1.18951	1.1964	1.19588	1.2016	1.18925	1.17054	1.14091	1.07204	1.03854	1.01459	0.992942	0.976751	0.964691	0.958302	0.94406	0.937195	0.927668	0.922764	0.916126	0.918469	0.919665	0.921291	0.916608	0.917188	0.917998	0.915426	0.910012	0.910753
cngc14-1_ox_cm	1.01382	1.02373	1.03924	1.05397	1.07415	1.09011	1.10161	1.10891	1.11999	1.13209	1.13703	1.12294	1.11097	1.1104	1.13653	1.15153	1.13971	1.10968	1.07089	1.0377	1.00945	0.984291	0.960158	0.943344	0.927356	0.916979	0.905269	0.895504	0.890502	0.886714	0.881109	0.875284	0.87633	0.872786	0.869964	0.870852	0.869422	0.868759	0.866577	0.869793	0.873722
cngc14-1_ox_cm	1.0159	1.02474	1.03568	1.04007	1.05101	1.06641	1.09001	1.10184	1.12461	1.14428	1.15865	1.17565	1.1732	1.18052	1.17355	1.16441	1.14529	1.11113	1.07638	1.03533	1.0031	0.979145	0.962839	0.948529	0.933006	0.922189	0.921437	0.916575	0.912478	0.908846	0.909929	0.909403	0.905856	0.902278	0.905721	0.905379	0.901949	0.896481	0.896378	0.894563	0.890061
cngc14-1_ox_cm	1.00298	1.00282	1.00544	1.00763	1.02244	1.02787	1.0459	1.05778	1.08143	1.10737	1.14327	1.15742	1.18809	1.20914	1.21974	1.21482	1.2041	1.16995	1.12265	1.08941	1.04995	1.01689	1.00051	0.980156	0.966765	0.958784	0.959277	0.963156	0.961329	0.953522	0.953069	0.945432	0.942605	0.947571	0.950107	0.956403	0.95726	0.958197	0.958151	0.960486	0.956558
cngc14-1_ox_cm	1.00018	1.00256	1.01188	1.01313	1.0182	1.02862	1.03951	1.05646	1.07733	1.09928	1.12719	1.15548	1.17723	1.20781	1.23358	1.25869	1.26936	1.27462	1.24193	1.20432	1.14863	1.10468	1.05604	1.02785	0.99708	0.972298	0.961314	0.950516	0.946189	0.937455	0.930854	0.930018	0.92419	0.922768	0.91939	0.919953	0.911678	0.911575	0.911735	0.911518	0.915866
cngc14-1_ox_cm	0.99631	1.00286	1.0045	1.00887	1.01433	1.02778	1.04295	1.06296	1.08896	1.12104	1.15804	1.19	1.21812	1.23038	1.22755	1.21732	1.19514	1.15778	1.11881	1.07117	1.03864	1.00485	0.989435	0.974615	0.964617	0.956248	0.946593	0.941954	0.94268	0.947785	0.950223	0.950072	0.956062	0.957561	0.948834	0.948644	0.946841	0.944518	0.942652	0.939451	0.938044
cngc14-1_ox_cm	1.02611	1.03923	1.03572	1.04524	1.05759	1.06855	1.08206	1.10126	1.12427	1.14774	1.17833	1.21195	1.22838	1.24114	1.22441	1.21026	1.17335	1.13836	1.09615	1.06204	1.03491	1.0172	0.992522	0.976459	0.97033	0.959741	0.95089	0.936582	0.933853	0.933629	0.935742	0.939331	0.937509	0.936372	0.937545	0.936963	0.941147	0.941637	0.940819	0.936287	0.935356
col_iaa	1.05181	1.06653	1.07622	1.08884	1.09752	1.11429	1.12952	1.14117	1.14744	1.15433	1.15868	1.1614	1.15472	1.17663	1.18925	1.20651	1.23364	1.2428	1.25112	1.25288	1.24637	1.23591	1.21345	1.19221	1.17061	1.14322	1.11096	1.10748	1.09241	1.07457	1.06801	1.05697	1.04854	1.04423	1.03429	1.02704	1.0222	1.01721	1.01552	1.00902	1.00122
col_iaa	1.03476	1.04393	1.05172	1.06177	1.07632	1.08784	1.10503	1.1164	1.12662	1.13838	1.1475	1.16346	1.1664	1.18007	1.19418	1.20011	1.19433	1.19176	1.18805	1.16758	1.15588	1.14492	1.12999	1.12108	1.10985	1.09563	1.08334	1.0769	1.06145	1.05654	1.05409	1.04657	1.04226	1.03459	1.02604	1.02401	1.01931	1.00932	1.00659	1.00265	0.999724
col_iaa	1.03084	1.03574	1.04483	1.05438	1.06209	1.07336	1.08642	1.09606	1.10689	1.11884	1.13043	1.14198	1.14425	1.14256	1.1337	1.10785	1.11507	1.11961	1.11308	1.09129	1.06898	1.05223	1.04518	1.03354	1.02358	1.01406	1.00924	1.0023	0.999221	0.992413	0.98672	0.985023	0.980309	0.977759	0.974291	0.971292	0.969049	0.968097	0.966385
col_iaa	1.02491	1.02826	1.03423	1.04088	1.04955	1.07006	1.07293	1.08711	1.10147	1.12363	1.13496	1.15637	1.15081	1.15455	1.14252	1.14615	1.15034	1.14188	1.13736	1.11587	1.09925	1.07763	1.06019	1.04251	1.02815	1.01463	1.00585	0.987098	0.981275	0.976077	0.975181	0.965469	0.956424	0.952614	0.9525	0.949808	0.953433	0.954834	0.962984	0.963338	0.970796
col_iaa	1.02594	1.03355	1.03526	1.03726	1.0458	1.06057	1.06681	1.07486	1.08549	1.09403	1.10732	1.1071	1.13198	1.14888	1.17115	1.19341	1.19965	1.20256	1.20384	1.18507	1.17878	1.15511	1.1385	1.12469	1.10589	1.08353	1.06743	1.05244	1.03422	1.02569	1.01689	1.00598	1.00122	0.992883	0.987861	0.987882	0.979368	0.977352	0.975923	0.971492	0.971692
col_iaa	1.03479	1.04548	1.04434	1.04957	1.05036	1.05492	1.05962	1.07536	1.07636	1.08546	1.09599	1.10828	1.11665	1.12801	1.13507	1.13897	1.14645	1.13762	1.12803	1.10629	1.09152	1.07771	1.0575	1.04252	1.02505	1.01114	0.994264	0.984196	0.967031	0.955681	0.952162	0.945835	0.941081	0.940865	0.939123	0.940363	0.945312	0.944538	0.944115	0.940848	0.942961
col_iaa	1.05331	1.06899	1.07727	1.08581	1.0922	1.11879	1.13574	1.15188	1.17798	1.19648	1.19387	1.18146	1.16685	1.16724	1.16448	1.14104	1.11336	1.09065	1.05947	1.0318	1.02333	1.001	0.986812	0.97673	0.959778	0.955933	0.950827	0.943965	0.937136	0.930146	0.932617	0.932195	0.93298	0.933634	0.93296	0.934431	0.930746	0.931923	0.932954	0.937681	0.93604
col_iaa	1.07883	1.08505	1.10423	1.1169	1.12276	1.14124	1.16599	1.18669	1.20676	1.21352	1.20911	1.20682	1.20825	1.20082	1.19676	1.18141	1.16324	1.12608	1.09953	1.08531	1.05613	1.04115	1.02502	1.00859	0.998082	0.986665	0.974224	0.966123	0.964236	0.955825	0.951844	0.945333	0.938611	0.932799	0.939361	0.94154	0.937626	0.940413	0.936192	0.940149	0.940757
col_iaa	1.05073	1.05724	1.06285	1.07119	1.08251	1.09742	1.11194	1.13082	1.14905	1.16017	1.16096	1.15265	1.15022	1.1397	1.1297	1.11146	1.08592	1.0581	1.0332	1.01147	0.993686	0.978481	0.960208	0.945363	0.940182	0.92239	0.921644	0.917595	0.918934	0.916033	0.91903	0.928925	0.930179	0.933855	0.941607	0.943184	0.944194	0.953921	0.953217	0.940937	0.953079
col_iaa	1.06399	1.06517	1.0572	1.05862	1.09382	1.12349	1.14461	1.15339	1.15924	1.15143	1.13964	1.13592	1.11863	1.102	1.08154	1.05387	1.03271	1.00736	0.992189	0.974774	0.960433	0.949003	0.941652	0.934899	0.927378	0.930166	0.930961	0.931586	0.933238	0.933318	0.932022	0.942328	0.937868	0.942384	0.943176	0.936315	0.941289	0.943974	0.944463	0.940355	0.940105
cngc14-1_iaa	1.00825	1.01026	1.01711	1.01875	1.02118	1.02924	1.03259	1.03265	1.03656	1.03832	1.0438	1.05415	1.0584	1.06338	1.0628	1.06506	1.06163	1.06079	1.05652	1.05587	1.04906	1.04169	1.03084	1.02436	1.02014	1.01329	1.00325	1.00179	0.997274	0.994607	0.992883	0.989744	0.991157	0.990146	0.984516	0.983327	0.983105	0.98515	0.98207	0.978951	0.976007
cngc14-1_iaa	0.999326	0.997137	1.0004	1.01298	1.01249	1.01961	1.02337	1.02522	1.03006	1.032	1.03273	1.03309	1.03818	1.0372	1.03799	1.04071	1.02737	1.02671	1.01574	1.00806	1.003	0.998377	0.99182	0.988357	0.982178	0.978199	0.973569	0.966962	0.966549	0.963037	0.955839	0.955709	0.949489	0.947782	0.944978	0.943043	0.942836	0.939024	0.940213	0.937379	0.937455
cngc14-1_iaa	0.9666	0.978326	0.982189	0.983192	0.98614	0.992148	0.990703	0.995943	0.994778	0.992122	0.994136	0.993424	1.00599	1.01602	1.01628	1.02121	1.02211	1.01973	1.0114	1.00934	1.00346	1.00145	0.993435	0.989604	0.989478	0.985142	0.985959	0.979485	0.979239	0.978031	0.979025	0.978217	0.973747	0.973092	0.967623	0.966755	0.965357	0.961847	0.960823	0.961453	0.957411
cngc14-1_iaa	1.02802	1.03327	1.03948	1.04837	1.05598	1.06283	1.06231	1.06881	1.07133	1.07105	1.08358	1.09059	1.10131	1.11116	1.11243	1.1009	1.08917	1.08664	1.06797	1.05418	1.04432	1.03603	1.02969	1.0274	1.02181	1.01026	1.01082	1.0027	1.00237	1.00107	0.992422	0.989306	0.988767	0.986827	0.983435	0.983538	0.979194	0.983187	0.978657	0.979272	0.978753
cngc14-1_iaa	1.03767	1.04491	1.05047	1.06032	1.06951	1.0686	1.08002	1.07816	1.08113	1.08741	1.09124	1.09716	1.10352	1.10586	1.10493	1.11042	1.1135	1.10649	1.09976	1.07899	1.06306	1.04471	1.02777	1.0201	1.01003	1.00022	0.988539	0.978302	0.974498	0.968403	0.961856	0.962486	0.955463	0.953125	0.949863	0.952318	0.955294	0.954082	0.959982	0.958788	0.957493
cngc14-1_iaa	1.01753	1.02357	1.02652	1.02611	1.02792	1.03058	1.03738	1.04857	1.06421	1.06812	1.08104	1.07943	1.08207	1.09234	1.08746	1.06868	1.06443	1.05408	1.03375	1.01904	1.00075	0.976193	0.962525	0.944911	0.939405	0.926474	0.919375	0.909965	0.902403	0.897036	0.890696	0.88585	0.884148	0.887748	0.889603	0.896604	0.90135	0.906586	0.912829	0.913992	0.920672
cngc14-1_iaa	1.03608	1.03781	1.04232	1.05299	1.0554	1.06369	1.06303	1.0713	1.07108	1.07089	1.07207	1.07548	1.07488	1.07492	1.07837	1.0744	1.07374	1.07487	1.07409	1.06853	1.05953	1.05077	1.04646	1.04068	1.0378	1.03363	1.02947	1.02863	1.02438	1.0257	1.0223	1.01382	1.01414	1.01346	1.00701	1.00852	1.00947	1.00521	0.99767	1.00074	0.991481
cngc14-1_iaa	1.03186	1.03613	1.04054	1.04245	1.0522	1.05722	1.06132	1.06172	1.05006	1.0536	1.03766	1.03532	1.02337	1.01194	1.00217	0.993196	0.985692	0.976764	0.974397	0.962369	0.958033	0.954852	0.951588	0.952522	0.956027	0.951869	0.951941	0.962228	0.967219	0.97291	0.972863	0.975801	0.983531	0.982262	0.989341	0.988237	0.985826	0.988815	0.985783	0.983138	0.984239
cngc14-1ox_iaa	1.0484	1.05183	1.06261	1.07761	1.09533	1.12108	1.13892	1.16149	1.17885	1.19028	1.2135	1.22941	1.24114	1.2591	1.26154	1.25852	1.25733	1.23917	1.22177	1.16495	1.13363	1.13481	1.11751	1.10197	1.08428	1.0732	1.05485	1.04035	1.03338	1.02544	1.01404	1.01287	1.00898	1.00257	0.994028	0.98977	0.980854	0.979934	0.971363	0.966608	0.959907
cngc14-1ox_iaa	1.04974	1.07011	1.07691	1.08316	1.09102	1.10364	1.09985	1.13569	1.18407	1.2107	1.23217	1.24587	1.24642	1.27662	1.27756	1.26892	1.28829	1.26222	1.23517	1.2056	1.17264	1.14722	1.12347	1.10363	1.086	1.06741	1.05931	1.04796	1.03583	1.02698	1.01981	1.01181	1.00404	0.997583	0.99124	0.987034	0.97975	0.971463	0.964471	0.960728	0.957668
cngc14-1ox_iaa	1.05747	1.06393	1.07504	1.09156	1.10792	1.12665	1.14334	1.16857	1.18638	1.21113	1.24061	1.25755	1.28188	1.30751	1.32682	1.34445	1.34979	1.35535	1.35419	1.34174	1.31223	1.27585	1.2426	1.20582	1.16908	1.15102	1.13323	1.11869	1.1103	1.09463	1.08466	1.07538	1.06558	1.05774	1.04956	1.0439	1.03601	1.0274	1.01629	1.00981	1.00375
cngc14-1ox_iaa	1.02071	1.02502	1.03937	1.05253	1.06485	1.08705	1.10297	1.11426	1.13019	1.14559	1.16828	1.1867	1.21507	1.22896	1.2561	1.26169	1.25651	1.23341	1.19802	1.15634	1.12094	1.07774	1.04686	1.03002	1.01173	1.00075	0.989738	0.982851	0.976622	0.973434	0.963162	0.95697	0.951519	0.948265	0.942368	0.937514	0.92821	0.925243	0.921273	0.92515	0.922647
cngc14-1ox_iaa	1.0206	1.03174	1.0402	1.05224	1.07548	1.09047	1.11295	1.13299	1.16369	1.18822	1.2163	1.2528	1.274	1.26989	1.25266	1.23526	1.20125	1.15858	1.12338	1.0876	1.06422	1.0401	1.02596	1.01135	0.991832	0.98681	0.975617	0.963393	0.960149	0.950576	0.95015	0.9497	0.94954	0.943936	0.941575	0.943844	0.942614	0.938236	0.938621	0.936562	0.935667
cngc14-1ox_iaa	1.04545	1.05383	1.07673	1.10756	1.13717	1.16846	1.20488	1.22902	1.25685	1.26393	1.25293	1.23761	1.22282	1.20324	1.17611	1.13676	1.09016	1.05425	1.03513	1.01734	1.00795	1.00177	0.992166	0.980888	0.96529	0.953003	0.937798	0.93839	0.939351	0.936382	0.933533	0.930968	0.943003	0.944978	0.945803	0.94074	0.93989	0.931936	0.935623	0.937379	0.929967
cngc14-1ox_iaa	1.0346	1.04035	1.04713	1.05673	1.06954	1.08259	1.10125	1.1246	1.15231	1.17893	1.21035	1.22839	1.25149	1.26983	1.2744	1.27566	1.24919	1.20489	1.16078	1.11646	1.08371	1.05838	1.03224	1.01596	1.0069	1.00787	1.00648	1.00013	0.994106	0.990139	0.985329	0.986042	0.974942	0.97354	0.96742	0.960596	0.956316	0.953871	0.950132	0.943852	0.946431
cngc14-1ox_iaa	1.02033	1.02523	1.0307	1.03923	1.04984	1.066	1.0777	1.10168	1.12509	1.14528	1.16762	1.1912	1.20925	1.2382	1.26356	1.27539	1.27621	1.25445	1.21762	1.17643	1.13221	1.09768	1.06391	1.03468	1.00727	0.996415	0.989426	0.985542	0.975339	0.97492	0.974617	0.962917	0.962062	0.956739	0.956478	0.9548	0.948798	0.949081	0.949318	0.949391	0.950902

## Sheet: S4-2c
d	0	20	40	60	80	100	120	140	160	180	200	220	240	260	280	300	320	340	360	380	400	420	440	460	480	500	520	540	560	580	600	620	640	660	680	700	720	740	760	780	800
col_cm	1	1.01211	1.01933	1.02959	1.03683	1.03112	1.02739	1.03978	1.04465	1.04189	1.04381	1.04315	1.04667	1.04462	1.04655	1.05842	1.04254	1.04891	1.05081	1.04369	1.07093	1.0777	1.06953	1.07252	1.05402	1.03721	1.02228	1.01023	0.994567	0.984084	0.968513	0.960458	0.952127	0.936862	0.931737	0.919773	0.909655	0.906037	0.899088	0.894483	0.891266
col_cm	1	1.01892	1.02143	1.01581	1.02474	1.03807	1.03845	1.04108	1.04654	1.04838	1.04836	1.05272	1.0501	1.05099	1.05739	1.04789	1.04427	1.04011	1.0501	1.05333	1.04702	1.0417	1.04006	1.0516	1.05338	1.04312	1.02662	1.02091	1.00669	0.99612	0.983511	0.977908	0.974438	0.96064	0.955803	0.940486	0.937949	0.929862	0.918009	0.912262	0.901557
col_cm	1	0.982356	0.986063	0.985829	0.990693	1.00079	0.994096	0.962288	0.959957	0.978627	0.984117	0.990697	0.989565	0.991363	0.994111	0.99863	1.00448	0.993135	0.988115	0.986418	0.97963	0.975523	0.962794	0.961975	0.950217	0.942522	0.937511	0.923057	0.912256	0.910855	0.902105	0.889585	0.877254	0.876452	0.87613	0.859337	0.859213	0.855674	0.844895	0.841132	0.841979
col_cm	1	1.00605	1.00757	1.01049	1.01904	1.01966	1.02013	1.02246	1.03065	1.04007	1.03609	1.04061	1.0375	1.04345	1.05733	1.0584	1.06012	1.06156	1.0686	1.07948	1.07763	1.07363	1.06734	1.05817	1.0418	1.03623	1.02488	1.0122	1.00133	0.976756	0.96192	0.955684	0.93737	0.924613	0.911982	0.911423	0.910421	0.902362	0.895203	0.892008	0.88751
col_cm	1	0.997034	0.991791	0.996747	1.00627	1.00718	1.00536	1.01196	1.0134	1.01711	1.01354	1.02149	1.01811	1.02411	1.03297	1.04194	1.0426	1.03998	1.03096	1.03024	1.05108	1.04732	1.04504	1.03753	1.02419	1.01369	1.00247	0.982846	0.975485	0.965628	0.953566	0.940632	0.92671	0.92554	0.917534	0.899539	0.895738	0.88318	0.887303	0.887175	0.888609
col_cm	1	1.00303	1.00247	1.00911	1.01671	1.00211	1.00442	1.00837	1.00921	1.00574	1.01419	1.03208	1.04518	1.04903	1.05837	1.06076	1.05669	1.06761	1.06743	1.0564	1.03637	1.01946	1.01076	1.00245	0.975888	0.964205	0.953672	0.935384	0.927543	0.91486	0.909085	0.901693	0.892773	0.883217	0.872006	0.869032	0.860804	0.851861	0.850935	0.840918	0.841582
col_cm	1	0.980496	0.985465	0.976747	0.986639	0.99446	0.985849	0.987082	0.993982	0.998141	1.00373	1.015	1.01823	1.01941	1.02784	1.02544	1.02182	1.01668	1.01294	1.00341	0.995485	0.981779	0.970407	0.959038	0.948881	0.937043	0.92714	0.909212	0.892908	0.888334	0.883785	0.885301	0.875905	0.866707	0.862151	0.862593	0.854974	0.855412	0.852438	0.849034	0.849773
col_cm	1	1.03056	1.02624	1.02524	1.02028	1.01808	1.01276	1.01502	1.01268	1.01288	1.01793	1.02058	1.02843	1.03633	1.04543	1.0473	1.03861	1.03947	1.02744	1.01795	0.996029	0.984402	0.965055	0.949073	0.936505	0.925029	0.908841	0.893717	0.879573	0.870569	0.860775	0.852617	0.854293	0.855608	0.850505	0.851079	0.850219	0.849338	0.850697
col_cm	1	1.01903	1.0213	1.01861	1.02008	1.01301	1.00539	1.01679	1.02336	1.02622	1.02877	1.02953	1.02801	1.02855	1.03044	1.02676	1.02464	1.01962	1.0141	1.00386	0.987557	0.972385	0.94977	0.929519	0.919192	0.896757	0.889499	0.880705	0.865778	0.862937	0.857902	0.855372	0.846751	0.848031	0.846148	0.851115	0.854234	0.851284	0.861229	0.859027	0.867505
col_cm	1	0.972642	0.979976	0.976977	0.976499	0.974878	0.974288	0.970622	0.970511	0.975119	0.983702	0.994061	0.991878	0.994644	0.995984	0.998881	0.992528	0.988027	0.990205	0.987845	0.977421	0.964995	0.957673	0.94166	0.934871	0.926336	0.916642	0.90284	0.89605	0.8935	0.887137	0.875841	0.873646	0.871095	0.8657	0.857646	0.85738	0.858219	0.851381	0.854745	0.840477
col_cm	1	1.00282	1.00289	0.999484	0.994052	0.995533	0.998581	0.99519	0.985592	0.986797	0.985608	0.9746	0.986921	0.993793	0.994164	0.996963	1.00085	1.00604	0.998796	0.988043	0.975996	0.965209	0.940775	0.927523	0.91593	0.905712	0.893083	0.895718	0.888851	0.872833	0.860328	0.85834	0.850829	0.840337	0.836222	0.839345	0.836832	0.838935	0.834053	0.825778	0.820844
col_cm	1	0.986295	0.928612	0.943533	0.981347	0.99062	0.989587	0.991309	0.994094	0.997795	1.0016	1.00107	1.00082	1.01012	1.01928	1.02707	1.0313	1.04463	1.03972	1.02728	1.01892	1.00737	1.00545	0.987194	0.964597	0.953009	0.939815	0.915948	0.901547	0.889226	0.877696	0.869562	0.860536	0.856704	0.844459	0.84626	0.838644	0.835491	0.834238	0.827732	0.833634
col_cm	1	1.00234	1.0065	1.00337	1.00432	1.00746	1.0006	1.01069	1.00716	0.991675	0.998117	0.992036	0.996592	0.99246	0.998712	0.998376	1.00691	0.991777	0.980026	0.975702	0.983034	0.974627	0.96545	0.948757	0.928684	0.921362	0.916863	0.898297	0.888687	0.885813	0.873975	0.874847	0.876495	0.865926	0.862694	0.861923	0.863993	0.860687	0.856566	0.865231	0.861807
col_cm	1	0.991654	0.98326	0.982771	0.977302	0.95982	0.958634	0.960612	0.989012	0.987119	0.991556	0.986193	0.988326	1.00494	1.00038	1.00516	1.00477	1.00355	0.999873	0.994657	0.97789	0.968211	0.954743	0.941168	0.925001	0.911402	0.905804	0.904574	0.895436	0.890676	0.889177	0.877818	0.875037	0.87006	0.865263	0.866031	0.861294	0.860058	0.860386	0.863187	0.861081
col_cm	1	1.00241	1.01141	1.00371	1.00192	1.00555	0.99937	0.997258	0.988287	0.990348	0.991981	0.989271	0.995705	0.998943	1.00156	1.00475	0.995827	0.995999	0.990781	0.994755	0.982399	0.981938	0.97015	0.961663	0.953511	0.941063	0.933598	0.923839	0.908035	0.90426	0.895765	0.887262	0.87995	0.876792	0.867928	0.863014	0.860756	0.858596	0.852675	0.853019	0.848949
col_cm	1	0.999719	1.00145	1.00106	0.997684	0.992861	0.991671	0.991909	0.990547	0.990252	0.988344	0.979032	0.970262	0.958641	0.954334	0.948633	0.94212	0.921403	0.909426	0.897332	0.886381	0.87177	0.863897	0.857104	0.841866	0.84402	0.837346	0.841685	0.83545	0.835009	0.843652	0.839168	0.837179	0.842303	0.844003	0.847817	0.8395	0.83955	0.847202	0.840996
col_cm	1	0.992535	0.99471	0.999586	0.992776	0.99824	1.00161	0.990437	0.994156	1.00242	0.999655	1.00413	1.00963	1.00719	1.00604	1.00689	1.00526	1.00219	0.991335	0.974432	0.962037	0.940327	0.91862	0.91257	0.90813	0.900501	0.900027	0.89394	0.87896	0.876838	0.876418	0.875222	0.871347	0.864662	0.861617	0.852498	0.856833	0.860664	0.857	0.863306	0.869936
col_cm	1	1.01131	1.01868	1.01228	1.01909	1.03456	1.03256	1.03219	1.04288	1.0419	1.04162	1.05327	1.04409	1.0296	1.04289	1.03778	1.02714	1.0405	1.10739	1.11975	1.1055	1.07327	1.0576	1.07221	1.07134	1.06695	1.08009	1.09617	1.06011	1.03335	1.02023	1.0201	1.00476	0.980992	0.969203	0.956328	0.943329	0.929436	0.902454	0.892032	0.89271
col_cm	1	1.01765	1.03268	1.03786	1.03484	1.04132	1.0394	1.05723	1.05218	1.07321	1.08604	1.09324	1.09524	1.10006	1.09773	1.10128	1.09941	1.10424	1.12848	1.12379	1.12111	1.13175	1.13062	1.12272	1.12053	1.12291	1.09921	1.07956	1.05826	1.03412	1.0115	1.00578	0.988983	0.957334	0.945257	0.926708	0.9163	0.914913	0.913069	0.912151	0.906179
col_cm	1	0.94656	0.945305	0.950914	0.963114	0.969079	0.968337	0.964782	0.97671	0.981188	0.990164	0.992141	0.980136	0.986322	0.986663	0.996613	1.01348	1.01929	1.02257	1.02514	1.03732	1.03864	1.04317	1.03221	1.02228	0.996123	0.974186	0.956537	0.944942	0.940496	0.915623	0.895008	0.896408	0.888469	0.872315	0.865062	0.856552	0.852956	0.847225	0.83916	0.832897
col_cm	1	1.03776	1.04384	1.06179	1.07153	1.08075	1.082	1.05916	1.04252	1.07623	1.09064	1.09188	1.10065	1.11138	1.1087	1.11784	1.07881	1.06357	1.09281	1.09854	1.09443	1.08745	1.0698	1.04477	1.02965	1.0114	0.979855	0.96303	0.943909	0.941583	0.931643	0.920931	0.911484	0.891808	0.899365	0.889965	0.877038	0.867412	0.865986	0.863143	0.859309
col_cm	1	0.97716	0.99742	1.00803	1.00811	0.997807	0.992961	0.96522	0.990608	1.01364	1.02655	1.02004	1.03677	1.03982	1.0444	1.04191	1.03574	1.03493	1.04369	1.04828	1.04081	1.04228	1.03403	1.00641	0.997989	0.986784	0.969198	0.957917	0.945591	0.932046	0.917802	0.904463	0.893731	0.876527	0.874575	0.866036	0.853647	0.843117	0.835118	0.825465	0.833811
col_cm	1	0.990145	1.00178	1.0038	1.00832	1.01518	1.03749	1.04904	1.04215	1.04216	1.03655	1.02293	1.00389	0.979674	0.984988	1.00728	1.02432	1.02613	1.06054	1.06178	1.07051	1.06772	1.06536	1.05347	1.03079	1.02816	1.01318	0.998655	0.992431	0.979582	0.95916	0.943064	0.939617	0.927777	0.915801	0.899542	0.892179	0.883178	0.882826	0.880113	0.861578
col_cm	1	1.01972	1.02277	1.02775	1.03603	1.03795	1.03969	1.04318	1.06056	1.06862	1.06111	1.06594	1.06878	1.08152	1.07986	1.0827	1.10253	1.10872	1.12632	1.14032	1.16048	1.17103	1.1661	1.16539	1.14905	1.12401	1.11896	1.10451	1.08139	1.05169	1.04912	1.02249	1.00051	0.990031	0.975661	0.963025	0.957119	0.947147	0.937904	0.935942	0.930698
col_cm	1	0.999688	1.00889	1.01973	1.03083	1.0326	1.03756	1.04312	1.04893	1.06216	1.05552	1.06243	1.06767	1.01465	0.947222	0.987297	1.03327	1.08098	1.10919	1.11418	1.11486	1.11459	1.09524	1.07587	1.06804	1.06338	1.04777	1.0362	1.02073	0.991824	0.979218	0.958509	0.946172	0.931607	0.92176	0.910812	0.889822	0.884288	0.858505	0.850862	0.852459
col_iaa	1.06285	1.06065	1.06109	1.07139	1.0767	1.09138	1.09608	1.10658	1.11182	1.11313	1.12414	1.14101	1.14955	1.15767	1.16681	1.16328	1.15402	1.14409	1.14741	1.14645	1.12336	1.10958	1.11115	1.1031	1.07612	1.06281	1.05229	1.04624	1.03101	1.02363	1.02351	1.02109	1.01802	1.0058	0.998976	0.992618	0.999707	0.995051	0.981563	0.9865	0.980629
col_iaa	1.03816	1.04216	1.04767	1.05542	1.05786	1.07392	1.0663	1.0583	1.06885	1.08452	1.08978	1.09833	1.11474	1.12998	1.1407	1.15425	1.15636	1.16492	1.15596	1.1656	1.15768	1.15813	1.14272	1.13527	1.11637	1.10521	1.09449	1.08284	1.07358	1.06839	1.05177	1.04138	1.03466	1.04363	1.03403	1.02099	1.01862	1.01432	1.00424	0.999507	1.0024
col_iaa	1.02824	1.03388	1.03761	1.04189	1.05408	1.06106	1.06411	1.06744	1.07655	1.08073	1.07702	1.09663	1.10826	1.12866	1.12824	1.13473	1.13695	1.14131	1.16566	1.16999	1.17291	1.16079	1.14488	1.13816	1.13067	1.1121	1.10244	1.09958	1.08847	1.07302	1.0611	1.05411	1.04375	1.04514	1.03481	1.02296	1.01072	1.00251	1.00009	0.995592	0.995094
col_iaa	1.03954	1.03826	1.04052	1.04685	1.05107	1.05913	1.0519	1.06627	1.05482	1.05617	1.07396	1.08723	1.04958	1.08145	1.09828	1.11323	1.12116	1.13752	1.14841	1.15358	1.15166	1.14303	1.13794	1.12571	1.10556	1.10317	1.09347	1.07461	1.06238	1.05675	1.04589	1.03972	1.04445	1.03673	1.03305	1.02462	1.02624	1.02079	1.01551	1.0112	1.0083
col_iaa	1.03139	1.04149	1.04858	1.05926	1.06585	1.06353	1.0684	1.07465	1.08139	1.0822	1.09275	1.1055	1.12157	1.12536	1.13774	1.14458	1.15133	1.15245	1.15621	1.16582	1.15413	1.12775	1.13866	1.13503	1.12471	1.103	1.0989	1.07984	1.06635	1.05696	1.05818	1.05212	1.04953	1.03778	1.02681	1.01898	1.01251	1.01128	1.01207	1.00755	0.997162
col_iaa	1.02085	1.01391	1.00491	1.00768	1.01757	1.01936	1.046	1.04894	1.05668	1.05476	1.06142	1.07306	1.05954	1.04206	1.09302	1.10364	1.10973	1.11699	1.11717	1.1185	1.12738	1.13021	1.12347	1.11737	1.11378	1.09695	1.10166	1.09195	1.08425	1.0746	1.06396	1.06018	1.0651	1.05979	1.04477	1.04434	1.03799	1.03398	1.03375	1.03316	1.03518
col_iaa	1.04034	1.03566	1.0331	1.02816	1.05212	1.04941	1.05341	1.06768	1.06807	1.0716	1.07035	1.0648	1.07245	1.07244	1.09421	1.0892	1.10377	1.10785	1.11645	1.12313	1.12382	1.12543	1.11328	1.10134	1.09285	1.09542	1.09352	1.08494	1.07329	1.07357	1.06815	1.06012	1.05484	1.04016	1.04814	1.03877	1.02293	1.02071	1.01736	1.0075	0.992101
col_iaa	1.12336	1.13497	1.1475	1.13161	1.13858	1.15074	1.14999	1.14857	1.16124	1.16757	1.15905	1.1744	1.17905	1.18094	1.19804	1.19769	1.19605	1.18869	1.16664	1.14572	1.13958	1.12227	1.10703	1.08756	1.06779	1.05099	1.03047	1.01481	1.01341	1.0054	0.996383	0.992251	0.983307	0.982161	0.972378	0.977214	0.97174	0.96799	0.978334	0.974624	0.973202
col_iaa	1.093	1.09674	1.07399	1.07686	1.10169	1.11302	1.11228	1.1127	1.09521	1.10839	1.12156	1.12557	1.13387	1.11501	1.12579	1.15289	1.15178	1.15808	1.15403	1.14268	1.12862	1.09478	1.07607	1.02974	1.02983	1.02392	1.01557	0.996748	0.97004	0.973939	0.972037	0.954687	0.952181	0.941781	0.929271	0.933888	0.928361	0.920621	0.906646	0.917949	0.920902
col_iaa	1.11232	1.10148	1.10969	1.1001	1.09678	1.10304	1.06681	1.03468	1.03709	1.07859	1.10733	1.1439	1.1548	1.16456	1.17685	1.18402	1.19577	1.20289	1.21266	1.2104	1.2069	1.17883	1.15603	1.1368	1.12726	1.10014	1.07492	1.04967	1.04069	1.03667	1.01594	0.994368	0.98072	0.97057	0.959704	0.953004	0.950965	0.939534	0.927517	0.919775	0.908663
col_iaa	1.10188	1.10193	1.10445	1.10887	1.11624	1.11995	1.1184	1.11065	1.11734	1.10322	1.11156	1.1128	1.10548	1.12624	1.14989	1.15522	1.14908	1.13156	1.14436	1.1686	1.16502	1.15657	1.14325	1.13782	1.11773	1.10996	1.09629	1.08718	1.07966	1.06305	1.04247	1.04051	1.03153	1.02346	1.01129	1.00916	0.998968	0.983614	0.974304	0.964962	0.957396
col_iaa	1.12218	1.12744	1.13361	1.13541	1.15753	1.15275	1.15538	1.15742	1.15983	1.17001	1.17127	1.1714	1.16817	1.1792	1.18691	1.1948	1.20036	1.20817	1.20122	1.20348	1.2124	1.20197	1.2036	1.18229	1.16762	1.14831	1.13248	1.10635	1.08915	1.07038	1.04065	1.01842	1.00554	0.986729	0.968257	0.972286	0.951824	0.939837	0.933099	0.927268	0.922451
col_iaa	1.10775	1.1081	1.11111	1.11287	1.10246	1.11698	1.11076	1.12901	1.13044	1.13063	1.13486	1.13542	1.12904	1.12102	1.11036	1.14983	1.16041	1.16572	1.16966	1.16364	1.16857	1.16802	1.17006	1.15503	1.13159	1.11304	1.10284	1.08617	1.0744	1.06072	1.05362	1.04	1.02436	1.01517	1.00361	1.00018	0.982317	0.97593	0.966173	0.952738	0.925015
col_iaa	1.10705	1.1083	1.11478	1.11269	1.11334	1.13379	1.14085	1.14712	1.14129	1.1337	1.1373	1.13763	1.13918	1.13706	1.14759	1.15737	1.16481	1.16686	1.16948	1.17234	1.16972	1.14626	1.12841	1.11536	1.09299	1.08436	1.08177	1.06529	1.04881	1.02778	1.0142	1.00197	0.99381	0.978351	0.957238	0.943911	0.945006	0.93846	0.935773	0.919063	0.912595
col_iaa	1.09545	1.09693	1.11279	1.12251	1.09493	1.09394	1.10196	1.10494	1.11034	1.12278	1.13999	1.13626	1.14978	1.16627	1.15552	1.16456	1.15932	1.13107	1.12591	1.13308	1.11554	1.09	1.0612	1.03824	1.02061	0.998935	0.975735	0.952279	0.948609	0.933565	0.924266	0.907554	0.903984	0.888049	0.890833	0.877658	0.880965	0.87871	0.865756	0.873867	0.863274
col_iaa	0.999076	1.03306	1.05608	1.06451	1.06135	1.07424	1.08903	1.09626	1.09948	1.10577	1.11232	1.12104	1.13385	1.08187	1.04683	1.07351	1.06841	1.18156	1.21178	1.21402	1.22348	1.21302	1.22272	1.2166	1.21284	1.19476	1.16468	1.14705	1.12452	1.1056	1.08614	1.05829	1.04723	1.0321	1.0096	1.00292	0.989306	0.992544	0.988633	0.971616	0.967639
col_iaa	1.0386	1.04838	1.06309	1.05778	1.06056	1.07302	1.07499	1.08064	1.08865	1.09054	1.10516	1.11493	1.11933	1.13166	1.12988	1.12988	1.12838	1.09703	1.14012	1.17458	1.15094	1.15853	1.17752	1.1481	1.15129	1.11713	1.0921	1.08471	1.06975	1.05863	1.05427	1.04454	1.0217	1.01054	1.00546	0.995924	0.980773	0.973765	0.975261	0.966983	0.95762
col_iaa	1.06474	1.06315	1.06759	1.04808	1.06907	1.06705	1.10799	1.10984	1.1283	1.13265	1.14078	1.15251	1.16327	1.171	1.19079	1.21237	1.24294	1.26705	1.27324	1.27375	1.28187	1.27311	1.25603	1.24079	1.23204	1.20867	1.16813	1.18447	1.17267	1.14242	1.12032	1.10465	1.08516	1.06444	1.04951	1.03609	1.02107	1.02717	1.01429	1.00214	0.987563
col_iaa	1.08261	1.08288	1.08606	1.1068	1.11965	1.11757	1.12733	1.13381	1.13832	1.14579	1.1586	1.16747	1.15698	1.17979	1.19626	1.21544	1.23106	1.23313	1.25375	1.24816	1.243	1.26124	1.28764	1.29051	1.2688	1.25917	1.24102	1.21487	1.17998	1.15108	1.12138	1.10701	1.0838	1.07472	1.06105	1.04892	1.02308	0.992164	0.979712	0.96901	0.96163
col_iaa	1.03529	1.04155	1.05285	1.05214	1.04708	1.07215	1.07388	1.06858	1.07723	1.07473	1.06344	1.04994	1.06253	1.08527	1.09953	1.11795	1.14997	1.16847	1.18997	1.19819	1.2009	1.1865	1.14567	1.12497	1.11743	1.09824	1.07978	1.07126	1.06362	1.05917	1.05826	1.0434	1.03936	1.04402	1.02568	1.01116	0.995096	0.977814	0.973562	0.968174	0.96727
col_iaa	1.08916	1.09364	1.10019	1.09583	1.09447	1.11357	1.11916	1.1182	1.14648	1.15648	1.14817	1.15924	1.17183	1.17831	1.19282	1.2255	1.26388	1.2668	1.27035	1.28809	1.29088	1.23048	1.23492	1.27061	1.26646	1.24599	1.21503	1.21873	1.19929	1.16685	1.13408	1.11271	1.09253	1.0698	1.05066	1.02709	1.02686	1.03142	1.0056	0.984523	0.964785
col_iaa	1.02735	1.06234	1.07809	1.08267	1.0836	1.08833	1.09258	1.09011	1.10187	1.11524	1.11909	1.13027	1.15559	1.1815	1.1842	1.20202	1.18704	1.20399	1.20904	1.22395	1.21324	1.22426	1.22365	1.19351	1.17082	1.17237	1.15388	1.16246	1.164	1.16243	1.16729	1.15609	1.14008	1.13702	1.12651	1.10837	1.10439	1.10642	1.10081	1.08278	1.07407
col_iaa	1.09934	1.0823	1.08774	1.09674	1.09268	1.11063	1.0837	1.13712	1.14958	1.16054	1.17036	1.17321	1.19127	1.18953	1.20127	1.21716	1.22917	1.23546	1.24945	1.26847	1.26306	1.28656	1.2947	1.26849	1.26564	1.26571	1.26254	1.23999	1.22038	1.21227	1.19565	1.18402	1.15316	1.1255	1.11463	1.11082	1.09366	1.06975	1.06518	1.0687	1.06363
afb1_cm	0.967231	0.972759	0.971801	0.972898	0.973956	0.967803	0.967808	0.956362	0.958463	0.961239	0.959814	0.962378	0.962684	0.967663	0.967224	0.970561	0.966715	0.958352	0.956425	0.946509	0.918133	0.936403	0.938494	0.931407	0.921517	0.91592	0.911505	0.913346	0.904747	0.894774	0.890365	0.886819	0.872526	0.873378	0.862818	0.861465	0.858449	0.846228	0.849054	0.849928	0.848067
afb1_cm	0.917317	0.919011	0.919183	0.918322	0.921367	0.922757	0.927839	0.920535	0.920216	0.912934	0.913276	0.910012	0.912329	0.912769	0.913543	0.916967	0.915226	0.917864	0.92064	0.919342	0.918064	0.90923	0.902031	0.901956	0.894832	0.891762	0.888636	0.884625	0.866324	0.85194	0.852718	0.8439	0.842482	0.82821	0.827319	0.823193	0.826458	0.82231	0.819231	0.818932	0.816654
afb1_cm	0.932784	0.934797	0.942211	0.937497	0.937244	0.928731	0.933293	0.930355	0.92674	0.922553	0.920803	0.91509	0.886235	0.898554	0.9155	0.921962	0.916797	0.904213	0.898004	0.899316	0.899227	0.891394	0.884747	0.881195	0.877304	0.862285	0.856943	0.858857	0.849429	0.848866	0.839924	0.8358	0.83229	0.829469	0.820584	0.824974	0.824265	0.815007	0.812286	0.809734	0.807414
afb1_cm	0.946427	0.951574	0.940255	0.946092	0.955026	0.946914	0.943887	0.945258	0.947298	0.941391	0.94793	0.939365	0.926706	0.925892	0.923505	0.927331	0.934667	0.939495	0.945375	0.934873	0.924353	0.925381	0.916134	0.91388	0.905306	0.897096	0.895595	0.881684	0.877467	0.866685	0.864254	0.860689	0.856891	0.853447	0.849235	0.846962	0.838684	0.835281	0.835333	0.839187	0.831366
afb1_cm	0.948419	0.952495	0.951773	0.947191	0.950326	0.943417	0.929202	0.923322	0.927302	0.940509	0.928391	0.931888	0.950201	0.948103	0.950862	0.954543	0.952823	0.948488	0.94088	0.930872	0.929736	0.922469	0.914405	0.910994	0.901155	0.890861	0.888283	0.879097	0.870759	0.872422	0.86483	0.853026	0.853138	0.856526	0.852359	0.850378	0.852142	0.845636	0.843037	0.845119	0.838688
afb1_cm	0.951237	0.95589	0.945861	0.953358	0.942994	0.938818	0.947932	0.952124	0.959196	0.967674	0.972045	0.973857	0.972371	0.977995	0.977249	0.968616	0.965197	0.967008	0.960028	0.950209	0.930962	0.925232	0.919024	0.912443	0.901868	0.899709	0.888955	0.878794	0.876996	0.872631	0.870298	0.866782	0.862047	0.861217	0.855336	0.865129	0.856159	0.856819	0.854996	0.842395	0.846257
afb1_cm	0.987995	0.991004	0.98751	0.987564	0.979826	0.979433	0.967466	0.960667	0.952392	0.945515	0.948722	0.955113	0.96167	0.960055	0.968439	0.957526	0.957171	0.949677	0.934742	0.924902	0.911159	0.898428	0.894507	0.889757	0.878189	0.869165	0.867178	0.866103	0.864355	0.857733	0.849293	0.846005	0.843704	0.846807	0.84289	0.840663	0.836833	0.833771	0.834872	0.834326	0.832853
afb1_cm	0.985316	0.93713	0.971829	0.978256	0.98108	0.980661	0.977373	0.97913	0.976849	0.979455	0.979014	0.981967	0.992361	0.989638	0.986587	0.979744	0.966599	0.959285	0.953101	0.942329	0.931494	0.928142	0.913287	0.903002	0.895642	0.889935	0.881459	0.883459	0.869006	0.86783	0.853683	0.850839	0.847511	0.842291	0.837273	0.846051	0.841934	0.848898	0.84839	0.845168	0.85302
afb1_cm	0.96951	0.973933	0.972264	0.969267	0.969471	0.96603	0.967005	0.958849	0.952446	0.971153	0.976548	0.97644	0.981722	0.975246	0.97528	0.961906	0.961867	0.949804	0.935374	0.921219	0.914458	0.90317	0.892252	0.879525	0.867127	0.857696	0.848079	0.837401	0.831556	0.827566	0.826473	0.825688	0.822765	0.826723	0.831767	0.828332	0.824669	0.829719	0.83134	0.830217	0.823422
afb1_cm	0.964413	0.959559	0.958572	0.952976	0.952345	0.951467	0.954954	0.964707	0.963624	0.956695	0.964928	0.97003	0.97601	0.980211	0.98128	0.978621	0.978809	0.981781	0.976108	0.96428	0.954516	0.952676	0.945048	0.937946	0.928154	0.919775	0.911255	0.893239	0.888906	0.884133	0.873969	0.864373	0.855557	0.854815	0.859623	0.847109	0.847826	0.844158	0.846831	0.848643	0.847627
afb1_cm	0.979182	0.989281	0.991686	0.986149	0.982836	0.975694	0.967405	0.970997	0.959944	0.95299	0.95564	0.952402	0.962346	0.962703	0.963269	0.96508	0.969305	0.97009	0.961018	0.954472	0.951205	0.963367	0.958726	0.951689	0.948134	0.942312	0.931749	0.908721	0.903344	0.904945	0.900378	0.893919	0.887509	0.886245	0.883895	0.880478	0.876386	0.867827	0.867803	0.86833	0.858445
afb1_cm	0.98611	0.978681	0.977031	0.979566	0.982679	0.979017	0.976228	0.981215	0.977286	0.969058	0.95805	0.93716	0.969141	0.974909	0.970845	0.971365	0.967682	0.967425	0.962262	0.961592	0.964815	0.958856	0.947901	0.941263	0.925533	0.920465	0.908467	0.890709	0.892377	0.88904	0.880588	0.873572	0.873062	0.873423	0.868279	0.859766	0.854299	0.854312	0.848162	0.846957	0.845241
afb1_cm	0.964538	0.976028	0.972506	0.970809	0.970969	0.969975	0.967817	0.951597	0.955174	0.9501	0.942806	0.972137	0.966211	0.966619	0.972958	0.969891	0.968901	0.964086	0.962119	0.960633	0.952925	0.949162	0.945435	0.935414	0.927835	0.921207	0.908689	0.903162	0.895339	0.888349	0.881345	0.871962	0.865749	0.86013	0.85475	0.852303	0.853863	0.845319	0.842417	0.841574	0.843309
afb1_cm	0.956136	0.957381	0.960988	0.959433	0.956746	0.947232	0.951578	0.948801	0.940659	0.957077	0.957223	0.950682	0.951062	0.96129	0.968355	0.963824	0.958215	0.95782	0.958887	0.952046	0.952889	0.947996	0.934678	0.919272	0.913677	0.900167	0.890513	0.891185	0.881723	0.877017	0.868648	0.861319	0.852798	0.844114	0.841645	0.847677	0.840256	0.833098	0.828116	0.829932	0.82949
afb1_cm	0.982498	0.983194	0.978937	0.969316	0.970041	0.956109	0.955326	0.956399	0.949124	0.946738	0.928121	0.935702	0.929647	0.934966	0.92993	0.930752	0.925221	0.932953	0.932211	0.928967	0.924676	0.922129	0.920516	0.912031	0.905929	0.900213	0.894379	0.891822	0.882873	0.868355	0.860219	0.857798	0.853596	0.841603	0.843857	0.836049	0.832674	0.833335	0.840384	0.842304	0.841133
afb1_cm	0.985972	0.978663	0.973063	0.982467	0.989862	0.981576	0.985252	0.986532	0.987617	0.981032	0.979416	0.979887	0.972029	0.967036	0.965496	0.969086	0.969402	0.976094	0.96992	0.959892	0.96362	0.954201	0.94579	0.934818	0.928405	0.914299	0.907012	0.886248	0.866169	0.86513	0.864161	0.849731	0.835246	0.834427	0.822739	0.827244	0.819655	0.813411	0.806946	0.805528	0.804815
afb1_cm	0.990375	0.985927	0.992851	1.00137	1.01322	1.0105	1.00485	1.00906	1.00421	0.999104	0.994833	1.00221	0.998114	0.995975	0.9985	1.00322	1.00698	0.998947	0.997873	0.994936	0.99133	0.981959	0.945633	0.95969	0.974707	0.967114	0.962642	0.95537	0.944781	0.927854	0.911327	0.905724	0.897358	0.884097	0.874334	0.864794	0.853588	0.850899	0.83285	0.832382	0.836357
afb1_cm	0.984478	0.984087	0.989754	0.985459	0.981373	0.988161	0.988769	0.996585	1.00307	1.00365	1.01409	1.01156	1.01421	1.01286	1.02002	1.02534	1.02149	1.01975	1.01683	1.00948	1.00941	1.00935	1.00478	0.991366	0.988586	0.975624	0.959832	0.957188	0.951808	0.93652	0.930204	0.91675	0.900542	0.884813	0.873826	0.853175	0.844366	0.850382	0.847886	0.842651	0.844683
afb1_cm	0.984492	0.99019	0.986266	0.988686	0.987461	0.988554	0.992457	1.00035	0.997625	0.991842	0.986706	0.993213	0.981645	0.991868	0.997717	1.0035	1.00677	1.00368	0.994846	0.985475	0.976929	0.97968	0.978667	0.96742	0.962808	0.953033	0.957602	0.937731	0.928242	0.913251	0.911958	0.904244	0.887955	0.878848	0.858859	0.849943	0.854808	0.839763	0.837475	0.824647	0.82265
afb1_cm	0.94682	0.964057	0.968792	0.972938	0.970903	0.964166	0.957772	0.965341	0.959011	0.952187	0.965165	0.950204	0.942858	0.945311	0.937868	0.921261	0.941127	0.951216	0.942624	0.96202	0.964079	0.960473	0.95263	0.946566	0.943386	0.941887	0.940539	0.922638	0.904585	0.917015	0.902811	0.89127	0.882022	0.871454	0.861564	0.855666	0.844618	0.83502	0.838408	0.838617	0.825298
afb1_iaa	0.987364	0.990097	0.981532	0.997409	0.997915	0.991018	0.985835	0.986423	0.996449	0.996213	0.988536	0.996626	0.991505	1.00908	1.015	1.01475	1.01531	1.0201	1.01975	1.01715	1.00727	1.01053	1.02446	1.02643	1.01842	1.01242	1.00367	0.997153	1.00311	1.0027	0.998496	0.993797	0.988872	0.971254	0.969386	0.970793	0.960727	0.953835	0.954962	0.952089	0.945306
afb1_iaa	0.960309	0.960875	0.960192	0.969506	0.971695	0.967651	0.971749	0.974873	0.979778	0.975163	0.986886	0.992476	0.997296	0.992327	0.991813	0.992797	0.980964	0.968836	0.957518	0.963709	0.958145	0.95731	0.957696	0.94732	0.94606	0.939285	0.93376	0.925356	0.925129	0.921124	0.913595	0.905116	0.897436	0.894163	0.896881	0.894601	0.896501	0.892188	0.895723	0.896426	0.899741
afb1_iaa	1.01084	1.00791	1.02013	1.02313	1.01792	1.01612	1.0137	1.02074	1.02232	1.01995	1.02272	1.01812	1.01353	1.03005	1.0363	1.03997	1.03133	1.03022	1.02346	1.02371	1.01809	1.01727	1.01475	1.00131	0.995935	0.986318	0.977538	0.973739	0.962121	0.960242	0.967764	0.953109	0.942714	0.941643	0.938871	0.932449	0.924321	0.914757	0.914978	0.907822	0.904709
afb1_iaa	0.978287	0.982378	0.981357	0.978786	0.975652	0.965777	0.966838	0.982698	0.982204	0.984606	0.985254	0.991998	0.999	0.997514	1.0018	0.997432	1.00253	1.01601	1.02217	1.01266	1.02292	1.02544	1.01887	1.01226	1.00232	0.996394	1.00808	1.00681	1.00464	1.00187	0.995913	0.995456	0.99171	0.989937	0.984559	0.984684	0.986218	0.974013	0.963142	0.967163	0.961854
afb1_iaa	0.984401	0.997207	1.00263	1.00242	1.00403	1.02071	1.01935	1.02564	1.01849	1.02211	1.02162	1.01555	1.0254	1.0375	1.04091	1.03775	1.03727	1.03142	1.02301	1.01676	1.02092	1.01666	0.998223	0.992955	0.983738	0.988844	0.994277	0.97134	0.964008	0.959017	0.951496	0.950116	0.946013	0.948847	0.943265	0.941523	0.934962	0.927975	0.925619	0.922675	0.926174
afb1_iaa	1.01619	1.02666	1.02894	1.03999	1.04037	1.04969	1.02477	1.00075	1.05332	1.06658	1.0727	1.06378	1.0747	1.07362	1.0705	1.06483	1.0452	1.03851	1.03326	1.0257	1.00762	0.992426	0.988706	0.988532	0.980123	0.973856	0.966444	0.959605	0.952763	0.94803	0.938607	0.947872	0.947421	0.940816	0.941907	0.933407	0.930223	0.934077	0.923536	0.920978	0.921172
afb1_iaa	1.07053	1.06967	1.07423	1.06787	1.06533	1.06586	1.0623	1.05943	1.05669	1.06769	1.06189	1.06469	1.06802	1.07026	1.07779	1.08123	1.07827	1.08039	1.07422	1.06967	1.05009	1.0417	1.03421	1.01844	1.02769	1.02141	1.0086	0.997811	0.984502	0.979158	0.965876	0.959323	0.949278	0.936974	0.937366	0.939546	0.927605	0.925668	0.925649	0.919182	0.926785
afb1_iaa	1.10517	1.11188	1.10956	1.11555	1.10723	1.10432	1.10701	1.10475	1.11164	1.11251	1.11602	1.11185	1.09606	1.0962	1.09934	1.09029	1.08836	1.0662	1.07769	1.07219	1.07117	1.07145	1.06763	1.06965	1.05794	1.04668	1.02608	1.02284	1.01898	1.00641	0.992185	0.984597	0.972633	0.956581	0.943778	0.933194	0.928355	0.934562	0.929559	0.933086	0.943035
afb1_iaa	1.0598	1.05263	1.07045	1.07764	1.07146	1.07048	1.06264	1.06407	1.06642	1.06479	1.07313	1.07837	1.07028	1.07646	1.07292	1.05784	1.06434	1.08522	1.09999	1.09665	1.09998	1.09632	1.09435	1.09066	1.07903	1.07257	1.06822	1.06486	1.04792	1.03512	1.02692	1.01594	1.01607	1.01953	1.01634	1.00366	1.00266	0.994356	0.979797	0.98377	0.973454
afb1_iaa	1.06211	1.05974	1.06976	1.06536	1.06439	1.06366	1.05882	1.06261	1.06143	1.06417	1.07394	1.07104	1.07211	1.07432	1.06585	1.06971	1.08139	1.07143	1.06574	1.05506	1.06384	1.0702	1.05736	1.05418	1.04245	1.03542	1.03026	1.03051	1.02416	1.02269	1.00621	0.996177	0.986627	0.985169	0.983427	0.973799	0.962468	0.947543	0.946373	0.935061	0.93537
afb1_iaa	1.07071	1.06344	1.07328	1.0717	1.07248	1.08134	1.06558	1.05863	1.0656	1.07352	1.08329	1.08026	1.08157	1.08617	1.091	1.09765	1.10392	1.10518	1.10406	1.09745	1.10725	1.09741	1.09741	1.09842	1.09773	1.0791	1.07898	1.08507	1.08063	1.06944	1.03592	1.04507	1.05616	1.05043	1.0325	1.02766	1.03108	1.02475	1.01363	1.00456	1.00114
afb1_iaa	1.00496	1.00563	1.00438	0.993193	1.00054	1.01798	1.03353	1.03392	1.03636	1.02815	1.0299	1.01857	1.02458	1.03496	1.03637	1.04263	1.05804	1.07554	1.07621	1.07581	1.06913	1.08153	1.07608	1.08262	1.08791	1.08724	1.08006	1.06027	1.05398	1.04817	1.03393	1.0196	1.01275	1.00115	0.993198	0.981534	0.980829	0.969662	0.97337	0.967775	0.956273
afb1_iaa	1.01868	1.02622	1.03943	1.02145	1.03286	1.05287	1.04556	1.04841	1.06798	1.08263	1.08713	1.09701	1.11033	1.12048	1.11622	1.11716	1.12515	1.11697	1.10853	1.10836	1.12555	1.11477	1.09558	1.10595	1.09101	1.09124	1.08973	1.09034	1.08209	1.07702	1.07318	1.06151	1.04071	1.05066	1.04555	1.0259	1.01705	1.00429	0.999173	0.985462	0.985324
afb1_iaa	1.0023	1.00343	1.00449	1.01701	1.01666	1.01298	1.01261	1.02273	1.02426	1.01582	1.02253	1.01904	1.02347	1.0287	1.02763	1.02374	1.03428	1.04313	1.04883	1.04874	1.04381	1.04945	1.03846	1.04289	1.04988	1.05242	1.04754	1.03032	1.02613	1.0228	1.019	1.00143	0.98524	0.98611	0.987378	0.983357	0.962722	0.951752	0.937559	0.932825	0.914895
afb1_iaa	0.997889	0.997553	1.00511	1.00266	0.986403	0.986967	0.99586	0.989479	1.00974	1.02495	1.02352	1.04782	1.04363	1.03528	1.0399	1.04034	1.04609	1.065	1.05996	1.06071	1.06554	1.06605	1.07595	1.07703	1.06193	1.05367	1.04653	1.036	1.02044	1.00826	1.01736	1.00184	0.982064	0.97335	0.966415	0.946409	0.929501	0.929963	0.924406	0.927002	0.918844
afb1_iaa	0.978496	0.985767	0.986558	0.988533	0.993327	0.994238	0.992536	0.978075	0.980755	0.974845	0.990691	0.992807	1.00076	1.00787	1.00834	1.01127	1.01328	1.01881	1.01614	1.01244	1.00539	0.99543	1.0085	1.00129	0.995706	0.985432	0.977446	0.986922	0.986211	0.983037	0.973525	0.956333	0.944933	0.93379	0.924532	0.920946	0.910929	0.912873	0.904851	0.851379	0.817081
afb1_iaa	0.999187	1.00308	1.01444	1.01392	1.01507	1.03055	1.03227	1.02732	1.03522	1.03891	1.04675	1.05828	1.04942	1.05681	1.06106	1.06952	1.07101	1.07303	1.07005	1.07352	1.0601	1.06257	1.05362	1.03135	1.03422	1.0318	1.0208	1.01873	1.00251	0.990835	0.983553	0.958869	0.949855	0.94041	0.947351	0.950821	0.958255	0.943678	0.928662	0.925864	0.928596
afb1_iaa	1.01594	1.02101	1.01831	1.02776	1.0225	1.02249	1.03224	1.02475	1.03403	1.05396	1.04482	1.03156	1.03205	1.03613	1.05018	1.05362	1.05401	1.05396	1.05302	1.05387	1.053	1.03939	1.02691	1.0234	1.0215	1.00634	1.0003	0.996995	0.989426	0.977393	0.979189	0.97131	0.965109	0.957975	0.945602	0.932617	0.925773	0.915113	0.92643	0.910774	0.906378
afb1_iaa	1.00035	1.01158	1.01714	1.01358	1.00178	0.992237	0.982885	0.997647	1.01744	1.01431	1.01131	1.02733	1.03895	1.04253	1.04024	1.04277	1.04511	1.04088	1.04845	1.05921	1.06651	1.07323	1.06308	1.05269	1.06476	1.06295	1.0512	1.02415	0.983885	1.00262	1.00475	1.0074	0.997178	0.999135	1.00062	0.992102	0.982074	0.973753	0.959015	0.951829	0.946859
afb1_S_cm	0.998151	0.998709	1.00275	0.994589	0.995745	0.993892	0.989132	0.991231	0.99684	0.997243	0.993394	0.995131	0.997529	0.999714	1.00567	1.00232	1.00044	0.991226	0.976188	0.970931	0.96926	0.967943	0.960698	0.949239	0.938619	0.926065	0.905002	0.894277	0.890804	0.891562	0.880954	0.879028	0.865417	0.866691	0.859515	0.861847	0.85352	0.845154	0.852081	0.850322	0.849592
afb1_S_cm	0.970338	0.980195	0.975575	0.972501	0.973796	0.976512	0.969405	0.967941	0.962307	0.964287	0.963063	0.953235	0.958061	0.956602	0.956698	0.965045	0.959044	0.955208	0.953975	0.94684	0.939717	0.93146	0.922613	0.913394	0.905888	0.896649	0.882627	0.877784	0.866613	0.867614	0.861386	0.859756	0.85868	0.859053	0.850825	0.842362	0.846441	0.843586	0.837041	0.836764	0.837243
afb1_S_cm	0.965629	0.965412	0.965559	0.963446	0.957627	0.966916	0.971293	0.96084	0.957082	0.959221	0.957319	0.952823	0.956557	0.955696	0.942274	0.93617	0.923536	0.938982	0.936058	0.92921	0.924672	0.925298	0.912968	0.904113	0.903907	0.895134	0.885773	0.874205	0.874051	0.868605	0.858978	0.851372	0.850526	0.847107	0.846881	0.845497	0.833925	0.830179	0.828109	0.823404	0.823794
afb1_S_cm	0.953436	0.954385	0.956539	0.959317	0.958995	0.951201	0.949443	0.950689	0.951074	0.940718	0.939568	0.94242	0.945372	0.951626	0.960228	0.954375	0.95452	0.944574	0.941464	0.934489	0.923709	0.918385	0.910199	0.903263	0.898951	0.893438	0.885163	0.875688	0.871382	0.865976	0.870725	0.862856	0.858558	0.857192	0.85991	0.855654	0.846116	0.851944	0.842547	0.844309	0.842847
afb1_S_cm	0.967248	0.966232	0.97401	0.972147	0.966943	0.965647	0.969917	0.961663	0.962392	0.957688	0.946059	0.947863	0.962564	0.962885	0.961473	0.956668	0.944239	0.938623	0.931429	0.920244	0.913232	0.907848	0.896257	0.894888	0.885082	0.875836	0.872359	0.866016	0.86107	0.857151	0.856242	0.844299	0.843788	0.854956	0.848793	0.846307	0.851897	0.858946	0.855347	0.850392	0.847765
afb1_S_cm	0.967887	0.967549	0.97089	0.971868	0.969962	0.965513	0.971967	0.964648	0.961289	0.957503	0.955802	0.964068	0.95963	0.965842	0.964022	0.963489	0.966281	0.972474	0.969101	0.959226	0.95261	0.948652	0.936359	0.930869	0.927523	0.926005	0.909459	0.90763	0.902516	0.902689	0.899759	0.886153	0.882591	0.877329	0.873466	0.872421	0.878512	0.886454	0.885167	0.88005	0.876722
afb1_S_cm	0.971865	0.961276	0.958495	0.965691	0.97131	0.973676	0.975683	0.985007	0.980671	0.976025	0.968207	0.971508	0.966422	0.980633	0.994236	0.988113	0.984785	0.985017	0.97686	0.966957	0.981928	0.976423	0.980108	0.988536	0.989605	0.992621	1.00397	1.00682	1.00291	1.00569	0.988233	0.977221	0.966814	0.954413	0.944938	0.939669	0.933542	0.930419	0.925039	0.924028	0.920279
afb1_S_cm	1.01618	0.993508	0.954656	0.963045	0.988469	0.984829	1.00179	1.01154	1.00266	1.00858	0.999866	1.00718	1.01017	1.00538	1.01781	1.01919	1.01956	1.01578	1.00806	1.0044	0.991791	0.978838	0.967592	0.957561	0.934643	0.933398	0.929362	0.926927	0.923012	0.919993	0.910872	0.905554	0.891829	0.894994	0.891398	0.883352	0.880936	0.873448	0.872552	0.869245	0.864972
afb1_S_cm	1.01595	1.01552	1.01141	1.01526	1.01081	1.0093	1.00853	1.00162	0.997175	0.998092	1.00186	0.991329	0.994379	0.986613	0.983942	0.992053	0.996666	0.996445	0.987538	0.982377	0.971523	0.964376	0.952697	0.947648	0.938311	0.928255	0.925319	0.919385	0.9124	0.907858	0.902279	0.893358	0.890484	0.889556	0.892979	0.890979	0.884322	0.882406	0.878525	0.879075	0.88179
afb1_S_cm	1.01633	1.01562	1.01426	1.01091	1.0053	1.00429	1.00093	0.995494	0.99946	0.996055	0.991092	0.966679	0.967249	0.965958	0.969075	0.977939	0.978464	0.965119	0.952407	0.94708	0.941066	0.936056	0.925942	0.917157	0.901338	0.895341	0.888337	0.885699	0.885914	0.881815	0.877859	0.878445	0.878055	0.876378	0.870931	0.865321	0.86956	0.864459	0.868832	0.869674	0.872415
afb1_S_cm	1.00099	0.994974	0.992965	0.990415	0.985911	0.993339	0.994616	0.988203	0.99548	0.994797	0.986496	0.977402	0.963548	0.979088	0.994017	0.997388	0.99908	0.993405	0.984421	0.981074	0.97643	0.967621	0.961515	0.955454	0.936998	0.921907	0.912705	0.914035	0.905508	0.895532	0.893013	0.879279	0.879805	0.872154	0.863421	0.864794	0.863895	0.867724	0.861482	0.856525	0.857249
afb1_S_cm	1.00728	1.00776	1.00866	0.997093	0.988601	0.991692	0.988118	0.993064	1.00092	0.997183	0.992	0.990522	0.991815	0.997909	0.993165	0.994792	0.993013	0.991251	0.986387	0.982722	0.979619	0.966657	0.957572	0.955712	0.943283	0.939328	0.936956	0.928617	0.91957	0.916821	0.911977	0.896927	0.89748	0.898559	0.893115	0.893697	0.886198	0.884633	0.884344	0.879822	0.88512
afb1_S_cm	1.01866	1.01675	1.0189	1.0116	1.00675	0.997314	0.997675	0.984472	0.992383	0.980495	0.989652	0.990224	0.99344	0.993838	0.983756	0.989292	0.994195	0.989352	0.982178	0.980546	0.975671	0.974817	0.965351	0.948077	0.945535	0.93627	0.930716	0.923943	0.919805	0.915001	0.908682	0.90405	0.902993	0.898171	0.897807	0.896656	0.893347	0.889614	0.892198	0.882615	0.883651
afb1_S_cm	0.965522	0.975605	0.974716	0.986287	0.987438	0.982731	0.977115	0.972167	0.980536	0.967208	0.970836	0.983279	0.979168	0.975203	0.974821	0.971653	0.969819	0.981594	0.9879	0.985428	0.978282	0.974409	0.976463	0.973615	0.973717	0.954079	0.943643	0.943034	0.927373	0.912532	0.902635	0.880774	0.875325	0.863856	0.85709	0.85286	0.843225	0.835098	0.833671	0.838776	0.827706
afb1_S_cm	0.958736	0.968887	0.972404	0.984293	0.984832	0.962756	0.973784	0.983444	0.985533	0.983947	0.985058	0.990752	0.992026	0.988723	0.992861	0.993997	0.993098	0.989076	0.988575	0.986618	0.982786	0.984408	0.986286	0.979383	0.966495	0.969618	0.953952	0.945008	0.93964	0.934593	0.91956	0.90287	0.897146	0.890013	0.87862	0.868251	0.848862	0.837602	0.840004	0.836098	0.823195
afb1_S_cm	0.957288	0.961026	0.961723	0.967194	0.958256	0.968427	0.972597	0.961068	0.960388	0.946558	0.923573	0.935032	0.952585	0.947222	0.971362	0.986402	0.995315	0.999648	1.00266	1.00495	1.00067	0.994919	0.982731	0.979362	0.980971	0.968864	0.943512	0.932876	0.921799	0.904968	0.894932	0.883509	0.874329	0.869852	0.857908	0.854738	0.850389	0.848486	0.84115	0.831109	0.830887
afb1_S_cm	0.953694	0.95696	0.96338	0.957348	0.968087	0.969574	0.97048	0.950357	0.946287	0.958177	0.948946	0.967473	0.963434	0.964247	0.961949	0.963097	0.976582	0.978681	0.984693	0.982731	0.979079	0.96669	0.970123	0.969493	0.956139	0.955863	0.942592	0.924686	0.912003	0.899487	0.886522	0.883596	0.884164	0.868222	0.858331	0.858703	0.845864	0.838428	0.836462	0.837647	0.832148
afb1_S_iaa	0.998218	0.992087	0.993289	0.992299	0.989854	0.991611	0.993241	0.99469	0.9962	0.995507	1.00604	1.01257	1.01274	1.01941	1.01924	1.02534	1.03839	1.05218	1.05455	1.05199	1.04936	1.05957	1.0641	1.06708	1.06798	1.05476	1.04011	1.04335	1.04004	1.03655	1.02399	1.02231	1.0197	1.00592	0.999733	0.996798	0.993517	0.993348	0.980483	0.977941	0.967277
afb1_S_iaa	1.01313	1.0237	1.02419	1.01699	1.01992	1.01574	1.02031	1.01294	0.983145	0.987474	0.994883	1.016	1.02561	1.04118	1.04211	1.04281	1.0479	1.05229	1.06119	1.06679	1.06504	1.06567	1.0643	1.0517	1.04788	1.04134	1.03845	1.0361	1.02918	1.00826	0.999889	0.992213	0.985021	0.99258	0.986828	0.978209	0.96679	0.967095	0.968152	0.958166	0.952152
afb1_S_iaa	1.0147	1.01272	1.01061	1.01571	1.01762	1.0286	1.02359	1.02617	1.03241	1.03919	1.0396	1.04702	1.05018	1.06239	1.06613	1.064	1.06779	1.06862	1.07057	1.05481	1.05155	1.05796	1.05609	1.03759	1.02612	1.02463	1.0126	1.00938	1.00136	1.00191	0.996433	0.977975	0.972822	0.9603	0.96798	0.959786	0.952556	0.947569	0.95359	0.947132	0.937669
afb1_S_iaa	0.972573	0.967524	0.976203	0.965541	0.971674	0.97664	0.969708	0.967368	0.967373	0.973064	0.965019	0.950511	0.963308	0.965061	0.981074	0.987394	0.990475	1.00363	1.00094	1.00665	1.00565	1.0008	0.997529	0.995628	0.985424	0.972509	0.969868	0.969704	0.964522	0.955958	0.949534	0.941698	0.936487	0.918793	0.91632	0.910135	0.914302	0.912266	0.903724	0.901474	0.892908
afb1_S_iaa	0.994451	0.994858	0.984307	0.990453	0.989204	0.982549	0.949078	0.958191	0.988736	0.993591	0.993122	1.0008	0.997295	1.00372	1.0093	1.01379	1.00642	1.00949	1.02265	1.01789	1.00782	1.00261	1.00252	0.997558	0.985675	0.990463	0.984673	0.974056	0.977633	0.961325	0.95242	0.951905	0.947435	0.936908	0.935203	0.928167	0.92232	0.914173	0.911516	0.903569	0.907931
afb1_S_iaa	1.06968	1.07022	1.07215	1.06877	1.07655	1.07256	1.07211	1.0798	1.08637	1.08183	1.08781	1.08225	1.07746	1.07321	1.08278	1.10279	1.10651	1.10843	1.10565	1.10864	1.10343	1.08989	1.08802	1.08645	1.08123	1.0642	1.04799	1.02782	1.03671	1.04351	1.03863	1.03176	1.03018	1.01905	1.0095	1.01327	1.00667	1.001	0.992703	0.992801	0.98252
afb1_S_iaa	1.09968	1.09849	1.09778	1.11265	1.09937	1.0933	1.09503	1.09599	1.08262	1.09141	1.09738	1.11586	1.12702	1.14163	1.15179	1.15215	1.14891	1.14578	1.13114	1.10786	1.11329	1.12396	1.11473	1.10654	1.09677	1.09376	1.08515	1.07316	1.06612	1.06358	1.05062	1.03553	1.04017	1.02825	1.02318	1.01951	1.00337	0.999749	0.997661	0.990896	0.987105
afb1_S_iaa	1.10755	1.10663	1.11586	1.11376	1.11606	1.1185	1.11386	1.10484	1.10668	1.11252	1.10686	1.11834	1.12582	1.12602	1.12762	1.13586	1.14633	1.14558	1.13818	1.12834	1.11218	1.11324	1.10001	1.097	1.08797	1.08537	1.08532	1.07978	1.07014	1.06334	1.05713	1.04678	1.04247	1.04689	1.03577	1.03952	1.04523	1.0359	1.02521	1.02877	1.02087
afb1_S_iaa	1.07654	1.07674	1.07712	1.07665	1.07548	1.07949	1.08206	1.0743	1.07161	1.06067	1.06264	1.05537	1.07984	1.08562	1.10524	1.11785	1.11926	1.13001	1.124	1.12197	1.10708	1.10333	1.09119	1.08792	1.08315	1.08023	1.06552	1.06102	1.0561	1.04586	1.04504	1.03538	1.03492	1.02788	1.01999	1.01363	1.00624	1.00401	0.994094	0.990869	0.989928
afb1_S_iaa	1.07891	1.0747	1.07356	1.07247	1.07381	1.07993	1.06965	1.08069	1.07619	1.0756	1.07462	1.06363	1.05379	1.0606	1.0702	1.08336	1.0996	1.10901	1.10539	1.10006	1.09035	1.08844	1.08452	1.07592	1.06959	1.05415	1.05462	1.04829	1.03763	1.03484	1.02866	1.02351	1.0173	1.01072	1.00169	1.00306	0.997764	0.991667	0.985922	0.975204	0.971652
afb1_S_iaa	1.1235	1.13347	1.12729	1.13408	1.12758	1.12665	1.1461	1.1293	1.13109	1.13579	1.13143	1.13925	1.13523	1.13414	1.13384	1.14212	1.14239	1.12892	1.10871	1.14091	1.14004	1.13335	1.12497	1.10147	1.09959	1.11678	1.09802	1.09045	1.09196	1.07795	1.06908	1.05706	1.04891	1.05235	1.03979	1.02881	1.02154	1.01012	1.00421	0.990411	0.980103
afb1_S_iaa	1.10491	1.11251	1.10351	1.10387	1.09246	1.10297	1.10541	1.09688	1.10844	1.11087	1.11665	1.11178	1.11206	1.12243	1.12096	1.1353	1.14978	1.15861	1.14118	1.14002	1.13615	1.13294	1.13982	1.13436	1.13437	1.12424	1.11729	1.10352	1.09823	1.07828	1.08163	1.07858	1.08373	1.07324	1.06558	1.05587	1.04342	1.03295	1.01883	1.02153	1.01375
afb1_S_iaa	1.06211	1.06074	1.05674	1.06335	1.06009	1.06604	1.06752	1.06043	1.0543	1.05585	1.05996	1.07095	1.07941	1.07413	1.08281	1.09283	1.10318	1.10667	1.09256	1.08325	1.07689	1.08787	1.08297	1.06866	1.07195	1.07114	1.06215	1.05393	1.042	1.0325	1.03997	1.03362	1.03177	1.02023	1.00973	1.00464	0.996914	0.999661	0.98379	0.979719	0.977232
afb1_S_iaa	1.06982	1.06239	1.06983	1.06921	1.06808	1.06736	1.07152	1.05375	1.05694	1.06381	1.06157	1.09071	1.10245	1.11354	1.11627	1.12455	1.12472	1.1194	1.12131	1.10798	1.10894	1.09871	1.08213	1.06243	1.05959	1.05885	1.04687	1.03866	1.02701	1.02414	1.01769	1.01545	1.00554	0.996944	0.987826	0.985334	0.969006	0.962951	0.956577	0.943106	0.943279
afb1_S_iaa	1.09971	1.09536	1.09733	1.10084	1.1018	1.09853	1.09261	1.09275	1.09358	1.09502	1.09103	1.09238	1.08858	1.09252	1.09594	1.09567	1.09667	1.09363	1.08598	1.06709	1.05828	1.06225	1.05268	1.05984	1.0632	1.07129	1.05466	1.04417	1.03925	1.02788	1.02962	1.02692	1.0195	1.01077	1.00098	1.00268	0.992209	0.987273	0.986046	0.974739	0.978207
afb1_S_iaa	1.02795	1.03218	1.0447	1.05135	1.05499	1.0464	1.04736	1.04746	1.05911	1.05824	1.0707	1.07136	1.07574	1.07695	1.08231	1.08494	1.0943	1.08879	1.04353	1.06031	1.05639	1.06291	1.08595	1.07109	1.06678	1.06167	1.05613	1.04325	1.0228	1.01618	1.00831	0.989315	0.985486	0.961043	0.951902	0.950663	0.931016	0.915826	0.919838	0.907415	0.881969
afb1_S_iaa	1.02047	1.02264	1.02942	1.02869	1.029	1.03877	1.02768	1.0467	1.0539	1.05826	1.05387	1.07097	1.0756	1.07837	1.08208	1.0905	1.10333	1.09244	1.09322	1.08005	1.04986	1.02631	1.03636	1.06604	1.09569	1.08574	1.05473	1.0486	1.03306	1.02977	1.02017	1.0088	1.0067	1.00745	1.00467	0.986653	0.96889	0.962616	0.961808	0.954162	0.963562
afb1_S_iaa	0.965446	0.958567	0.971642	0.984237	0.987274	0.993646	1.01824	1.01651	1.01601	1.02531	1.0268	1.0419	1.04332	1.05281	1.04962	1.07121	1.08103	1.08384	1.07998	1.07003	1.07127	1.06327	1.06224	1.05664	1.04046	1.03332	1.01783	1.00531	0.991824	0.98911	0.972133	0.966229	0.948499	0.934498	0.922561	0.909446	0.895205	0.898441	0.898535	0.897738	0.882287
afb1_S_iaa	1.03422	1.03783	1.04295	1.03564	1.03893	1.04401	1.0453	1.03928	1.04594	1.05458	1.04886	1.04512	1.0561	1.05165	1.0565	1.06547	1.07634	1.07558	1.08093	1.07437	1.07918	1.07931	1.06836	1.05703	1.04389	1.05526	1.0439	1.0413	1.02629	1.00063	0.97706	0.967182	0.969339	0.966253	0.96038	0.9559	0.937056	0.932066	0.920447	0.90467	0.904214
afb1_S_iaa	1.03279	1.04735	1.05537	1.05736	1.05448	1.05862	1.06972	1.06807	1.06673	1.09393	1.07591	1.06577	1.07273	1.07208	1.08365	1.10135	1.08424	1.08224	1.06288	1.06062	1.05402	1.11065	1.10107	1.08753	1.08314	1.07308	1.06416	1.05149	1.04391	1.03692	1.02136	1.00676	1.00583	1.00646	0.993015	0.972975	0.967425	0.95669	0.958147	0.945023	0.946131
afb1_S_iaa	1.03401	1.03951	1.04339	1.06268	1.06596	1.06596	1.09144	1.09791	1.09881	1.10347	1.10454	1.09788	1.10858	1.13142	1.13825	1.15424	1.14377	1.14629	1.14986	1.15023	1.14826	1.15641	1.1535	1.14617	1.13892	1.13526	1.12399	1.10976	1.1043	1.08929	1.08742	1.07397	1.06893	1.05258	1.05218	1.06683	1.04406	1.0405	1.03779	1.02828	1.01348
afb1_S_iaa	1.03317	1.03515	1.02977	1.0414	1.05403	1.04243	1.06	1.07714	1.06708	1.06288	1.07523	1.07311	1.067	1.07777	1.09021	1.09	1.08521	1.08253	1.07941	1.07286	1.08039	1.08099	1.07758	1.08017	1.06797	1.05472	1.04781	1.04415	1.03485	1.03169	1.03018	1.02685	1.02835	1.0184	1.01524	1.01096	1.00371	0.986806	0.984608	0.978889	0.97824

## Sheet: S4-2d
d	0	20	40	60	80	100	120	140	160	180	200	220	240	260	280	300	320	340	360	380	400	420	440	460	480	500	520	540	560	580	600	620	640	660	680	700	720	740	760	780	800
col_cm	1.03734	1.04238	1.04989	1.05682	1.06046	1.05821	1.04273	1.05208	1.05808	1.06818	1.08508	1.09098	1.09297	1.10376	1.11148	1.12269	1.13516	1.13397	1.13358	1.12978	1.1316	1.11858	1.09347	1.06874	1.04462	1.01741	0.99807	0.986247	0.966479	0.950183	0.931783	0.923101	0.912083	0.900648	0.894202	0.884617	0.881005	0.873467	0.872907	0.866764	0.859149
col_cm	1.0089	1.01118	1.00536	1.00373	1.01208	1.01484	1.01923	1.02078	1.02456	1.02114	1.02516	1.0303	1.03059	1.0346	1.03941	1.04105	1.03914	1.04028	1.03129	1.01367	0.99857	0.982834	0.968859	0.951468	0.93988	0.918149	0.901773	0.889887	0.878118	0.8656	0.852121	0.846825	0.837762	0.831691	0.828136	0.819498	0.811718	0.812947	0.811927	0.813865	0.811022
col_cm	0.996387	1.00326	1.0034	1.00877	1.01287	1.01113	1.00505	1.01202	1.0209	1.0367	1.03871	1.04097	1.0498	1.05596	1.05902	1.06345	1.07194	1.06999	1.06662	1.05184	1.03085	1.012	0.994552	0.976104	0.955403	0.934469	0.920144	0.906404	0.895029	0.885614	0.874946	0.874138	0.867823	0.861974	0.857199	0.852591	0.845785	0.841488	0.834543	0.828106	0.82255
col_cm	0.986095	0.987411	0.993902	0.999067	1.00473	1.01023	1.00908	1.00779	0.989357	0.992188	0.989089	0.981238	0.98498	1.0164	1.03449	1.03769	1.03428	1.03017	1.02192	1.00514	0.985518	0.970947	0.947302	0.930229	0.914482	0.898382	0.883478	0.869593	0.855727	0.846524	0.832821	0.82544	0.812995	0.807998	0.797017	0.791618	0.791857	0.791368	0.788891	0.789249	0.787966
col_cm	0.982441	0.987083	0.987503	0.988138	0.99662	0.998232	0.998342	1.00154	1.00026	0.997742	0.997588	1.00236	1.0015	1.00563	1.00552	1.01226	1.01505	1.01488	1.00856	0.990273	0.97707	0.953158	0.938793	0.916862	0.906419	0.888252	0.871348	0.861716	0.853628	0.839243	0.834799	0.829821	0.826517	0.818428	0.81044	0.81426	0.812709	0.810806	0.804838	0.799815	0.802184
col_cm	1.00461	1.00882	1.0188	1.02295	1.0279	1.02458	1.03151	1.04241	1.04129	1.0393	1.04103	1.04004	1.04401	1.0529	1.05735	1.06135	1.07213	1.08322	1.08854	1.08742	1.08801	1.06999	1.05674	1.03675	1.01689	1.00016	0.98474	0.97474	0.953181	0.94073	0.915392	0.907199	0.902884	0.897698	0.88773	0.882746	0.878662	0.867899	0.862219	0.855243	0.852562
col_cm	0.989614	0.992627	1.00487	1.00852	1.01106	1.01888	1.02729	1.03269	1.03855	1.04279	1.04184	1.0468	1.05069	1.04835	1.0503	1.05654	1.06901	1.07883	1.08607	1.09594	1.09747	1.09799	1.0895	1.0738	1.06178	1.04568	1.02541	1.01175	0.995566	0.98186	0.967963	0.948225	0.936993	0.92665	0.91007	0.89568	0.885958	0.875732	0.870504	0.862917	0.853723
col_cm	0.999366	1.00187	1.00764	1.01078	1.01626	1.02378	1.02813	1.02913	1.02697	1.02475	1.02645	1.02721	1.03052	1.03438	1.03558	1.03741	1.03912	1.04762	1.04162	1.03858	1.03516	1.02647	1.01087	0.997381	0.984445	0.970631	0.957	0.93982	0.926363	0.914361	0.900431	0.887671	0.882001	0.877057	0.872627	0.861661	0.854828	0.848511	0.839523	0.835591	0.830187
col_cm	0.99969	1.00507	1.01154	1.01557	1.01636	1.02932	1.03285	1.03842	1.04318	1.04965	1.05587	1.06032	1.06465	1.07658	1.08767	1.08275	1.07608	1.06883	1.09579	1.08113	1.07313	1.07634	1.07237	1.05688	1.04605	1.02859	1.01257	0.99857	0.987361	0.975162	0.966537	0.954077	0.941988	0.933262	0.928485	0.918935	0.91022	0.903772	0.894599	0.886394	0.876419
col_cm	0.99555	1.00192	1.00656	1.01102	1.019	1.0222	1.02637	1.03354	1.03737	1.03813	1.0364	1.03919	1.04137	1.04681	1.05873	1.06735	1.07032	1.07641	1.07623	1.07756	1.07505	1.0628	1.04777	1.03042	1.00915	0.993788	0.978404	0.959483	0.941846	0.931992	0.917046	0.904535	0.894792	0.886346	0.880079	0.865676	0.851119	0.841328	0.840692	0.840081	0.837652
col_cm	1.06132	1.06444	1.07345	1.0695	1.06863	1.07136	1.0667	1.07725	1.0845	1.08681	1.10234	1.11488	1.11589	1.11534	1.11611	1.10988	1.10061	1.08316	1.07913	1.06038	1.03339	1.00843	0.981021	0.947831	0.9273	0.912053	0.893693	0.876015	0.860504	0.844563	0.831261	0.823602	0.816635	0.812	0.803449	0.798752	0.798125	0.797198	0.791531	0.794131	0.797244
col_cm	1.09685	1.09652	1.09094	1.093	1.08529	1.08869	1.09425	1.09157	1.09112	1.085	1.08889	1.09452	1.09159	1.0953	1.09169	1.09394	1.09144	1.08007	1.06262	1.05557	1.03844	1.02127	1.00833	0.998843	0.983828	0.970588	0.961766	0.946322	0.931609	0.924545	0.909838	0.894466	0.890873	0.884576	0.876187	0.865319	0.857662	0.858278	0.849512	0.846587	0.842367
col_cm	1.00987	1.01396	1.01421	1.01632	1.01909	1.01723	1.01325	1.00799	1.01646	1.01755	1.01718	1.02066	1.02702	1.02733	1.02657	1.03154	1.03602	1.04295	1.045	1.04233	1.03567	1.03318	1.02343	1.0004	0.981124	0.961809	0.946183	0.934234	0.919198	0.903845	0.888698	0.871643	0.859118	0.852869	0.837182	0.827489	0.820028	0.811649	0.806788	0.799287	0.789786
col_cm	1.022	1.02164	1.02145	1.02333	1.02384	1.02331	1.01446	1.01244	1.0112	1.00827	1.00744	1.00364	1.00768	1.01081	1.01014	1.00513	1.00829	1.0139	1.01703	1.01595	1.01386	1.00271	0.989265	0.972407	0.955751	0.938637	0.92092	0.903584	0.886926	0.868961	0.85326	0.83816	0.827249	0.81746	0.809529	0.8045	0.80303	0.788733	0.781504	0.780999	0.774441
col_cm	0.954565	0.956732	0.95778	0.953656	0.951905	0.952252	0.95635	0.9626	0.973621	0.973667	0.974843	0.978526	0.976046	0.975888	0.979681	0.982232	0.98072	0.986442	0.988949	0.990118	0.989021	0.985517	0.981965	0.973204	0.960216	0.943311	0.927949	0.918149	0.904531	0.894163	0.879032	0.866652	0.856505	0.845521	0.835335	0.826037	0.823771	0.80445	0.79572	0.7927	0.785457
col_cm	0.980315	0.984329	0.984048	0.985204	0.985212	0.99194	0.988591	0.985759	0.987371	0.985439	0.984864	0.982385	0.981795	0.979209	0.981035	0.978163	0.979813	0.97767	0.975914	0.976689	0.97449	0.971638	0.962665	0.9579	0.947187	0.934957	0.924877	0.914404	0.902457	0.892676	0.880535	0.86819	0.853989	0.842582	0.833518	0.825746	0.819468	0.811734	0.799039	0.797358	0.78508
col_cm	0.931212	0.936583	0.938945	0.939369	0.94426	0.951981	0.950246	0.953195	0.949815	0.954469	0.960458	0.961709	0.966048	0.967367	0.96983	0.966196	0.957022	0.947224	0.936044	0.924832	0.911601	0.892069	0.88113	0.866584	0.848406	0.834722	0.821206	0.814195	0.805683	0.799583	0.795574	0.789398	0.777865	0.77127	0.766995	0.757667	0.756129	0.753543	0.754375	0.756065	0.753952
col_cm	0.94386	0.944517	0.950033	0.953028	0.955548	0.959318	0.960656	0.965692	0.968911	0.969815	0.971108	0.975396	0.973667	0.976457	0.98368	0.989784	0.989488	0.993254	0.992741	0.989384	0.980425	0.971824	0.963351	0.95014	0.939061	0.921838	0.915174	0.90146	0.888725	0.876422	0.862871	0.849858	0.841844	0.833727	0.828227	0.816983	0.815902	0.807151	0.805819	0.800545	0.79484
col_cm	1.00564	1.00713	1.01095	1.00813	1.00729	1.00633	1.00607	1.00658	1.00763	1.0051	0.998289	0.994172	0.995834	1.00488	1.0108	1.00569	0.995464	0.984618	0.970689	0.947694	0.933472	0.918801	0.90095	0.883524	0.869776	0.861179	0.848126	0.839402	0.832776	0.824573	0.819055	0.814531	0.808765	0.807057	0.801806	0.80157	0.797525	0.793126	0.788007	0.786136	0.786258
col_cm	1.02043	1.02488	1.02249	1.03226	1.03372	1.03205	1.03404	1.03447	1.02773	1.02333	1.02004	1.02025	1.01438	1.01649	1.01462	1.01168	1.016	1.01076	1.00293	1.00419	0.994145	0.988647	0.977546	0.961	0.9459	0.937602	0.924696	0.910347	0.900001	0.887992	0.882844	0.870783	0.864236	0.858183	0.852093	0.846792	0.836506	0.832789	0.831745	0.824037	0.81958
col_cm	0.974963	0.967442	0.966143	0.951596	0.938853	0.93808	0.955155	0.971103	0.971003	0.973806	0.984447	0.983732	0.986075	0.987461	0.995448	0.995658	0.987511	0.981288	0.968304	0.948156	0.929733	0.916288	0.900081	0.886517	0.879302	0.869441	0.855207	0.844515	0.839978	0.835215	0.826419	0.824198	0.816466	0.81076	0.809325	0.804461	0.796399	0.797712	0.794816	0.79377	0.785336
col_cm	0.966359	0.96816	0.971836	0.973659	0.97475	0.974679	0.981103	0.986564	0.983102	0.987055	0.993726	0.992754	0.991635	1.00246	0.995411	0.992128	0.985843	0.976414	0.960509	0.936201	0.915042	0.901116	0.882797	0.864629	0.854105	0.841249	0.834332	0.831496	0.823202	0.817937	0.813016	0.807399	0.805272	0.803811	0.79793	0.796082	0.797558	0.796251	0.798344	0.801505	0.798471
col_cm	0.980233	0.984821	0.989392	0.993585	0.999147	0.996442	1.00029	0.999292	0.998117	1.00565	0.999796	1.0038	1.00211	1.0087	1.01388	1.01803	1.01708	1.01509	1.00796	0.995408	0.979095	0.95786	0.942602	0.926583	0.915589	0.902348	0.895266	0.885353	0.872999	0.865095	0.850236	0.842462	0.837171	0.829824	0.833992	0.835884	0.839459	0.835193	0.834873	0.832793	0.826008
col_cm	1.00553	1.00858	1.01763	1.01809	1.02175	1.02412	1.02903	1.03057	1.02421	1.02593	1.02643	1.02678	1.0245	1.02918	1.04233	1.04912	1.06571	1.0747	1.08201	1.08894	1.08296	1.08246	1.06302	1.04441	1.02243	0.997045	0.975608	0.957748	0.946407	0.927552	0.919022	0.906334	0.896879	0.886293	0.876609	0.865077	0.856335	0.845023	0.838244	0.831532	0.823165
col_cm	1.01718	1.01436	1.02489	1.02887	1.03167	1.03311	1.03359	1.035	1.03575	1.03785	1.03939	1.04149	1.0453	1.04917	1.05271	1.05645	1.06477	1.07405	1.07305	1.06801	1.06556	1.05955	1.05155	1.04138	1.0251	1.01248	0.994084	0.973842	0.959736	0.944151	0.929524	0.91952	0.910413	0.897997	0.888413	0.875693	0.868489	0.860672	0.850686	0.848473	0.83909
col_cm	1.02677	1.03424	1.03736	1.03693	1.03714	1.03371	1.04202	1.0367	1.02279	1.01619	1.01738	1.02057	1.02772	1.04054	1.04355	1.04848	1.05718	1.06176	1.06103	1.05722	1.03955	1.03109	1.01777	1.00459	0.990967	0.979987	0.968828	0.955805	0.946708	0.941386	0.930198	0.920906	0.912506	0.90215	0.895818	0.887218	0.890405	0.880402	0.87767	0.870853	0.866184
col_cm	1.00576	1.00819	1.01131	1.01464	1.01378	1.01363	1.01845	1.01733	1.0038	1.00578	1.00659	1.01918	1.02512	1.03057	1.03044	1.035	1.04629	1.04144	1.04261	1.03824	1.0324	1.02095	1.0097	0.993833	0.978058	0.966704	0.950294	0.933218	0.921682	0.909222	0.898881	0.892658	0.879993	0.872793	0.866707	0.856291	0.848908	0.841161	0.838326	0.833243	0.828764
col_cm	0.997131	1.00511	1.01892	1.01582	1.01911	1.024	1.02345	1.02282	1.02607	1.02842	1.02827	1.02509	1.02344	1.02785	1.03215	1.03327	1.03724	1.05082	1.05817	1.06268	1.05688	1.03719	1.03161	1.03327	1.01956	1.00486	0.983112	0.9721	0.958435	0.943576	0.928765	0.923489	0.906022	0.890979	0.880617	0.876868	0.869133	0.857419	0.853241	0.840753	0.836294
col_cm	0.992405	0.995687	0.997776	1.01139	1.00891	1.00742	0.99636	1.00085	1.00608	1.01312	1.02897	1.03168	1.03894	1.03949	1.04053	1.03584	1.02605	1.01811	1.00641	0.990543	0.978637	0.964891	0.9462	0.939349	0.92759	0.913767	0.902387	0.892344	0.883144	0.87497	0.8656	0.859613	0.853799	0.848218	0.839119	0.836083	0.83088	0.820027	0.819192	0.817664	0.810617
col_cm	0.985537	0.981355	0.979261	0.983746	0.989016	0.991535	0.986648	0.994396	0.991721	0.992759	0.995306	0.997866	1.00385	1.00596	1.01221	1.02165	1.02976	1.03806	1.04156	1.03544	1.02444	1.02277	1.01342	1.00479	0.985176	0.972005	0.954242	0.938154	0.924418	0.906804	0.894287	0.884542	0.876172	0.864633	0.857853	0.855154	0.851618	0.850733	0.840761	0.838037	0.838074
col_cm	0.988003	0.989782	0.988258	0.995628	0.998375	1.00038	0.999393	0.996278	0.989339	0.988835	0.984427	0.983137	0.976039	0.976591	0.974865	0.975478	0.982161	0.981709	0.975678	0.967021	0.954138	0.942286	0.928573	0.912555	0.899508	0.887742	0.874766	0.865312	0.856962	0.850567	0.843988	0.840569	0.835714	0.830699	0.827676	0.823119	0.820864	0.811493	0.807931	0.80251	0.801372
col_cm	0.99181	0.99873	1.00153	1.00362	0.997603	0.994459	0.992089	0.991019	0.985539	0.983173	0.980457	0.976457	0.96593	0.971538	0.986093	0.995652	0.994133	0.986482	0.97905	0.966244	0.952897	0.935579	0.919986	0.903873	0.884201	0.872569	0.862661	0.850847	0.844655	0.835354	0.824253	0.812833	0.806818	0.806474	0.800804	0.803632	0.802071	0.79874	0.798394	0.796872	0.796407
col_cm	0.994051	1.00232	1.0077	1.01195	1.0145	1.01238	1.0069	1.00812	1.00608	1.01636	1.01637	1.01143	0.999882	0.995308	1.00866	1.02454	1.02974	1.03492	1.04346	1.04713	1.04309	1.03417	1.02283	1.00566	0.99241	0.971902	0.95168	0.932573	0.921245	0.907758	0.893896	0.880996	0.872465	0.866264	0.858417	0.847705	0.842381	0.839418	0.831147	0.831217	0.826811
col_cm	1.01469	1.01801	1.02322	1.02922	1.01986	1.02139	1.01824	1.01758	1.02249	1.02085	1.02293	1.03561	1.04161	1.0463	1.05133	1.05852	1.06592	1.06959	1.07288	1.06587	1.05666	1.04098	1.02922	1.01523	0.996778	0.979362	0.96935	0.953674	0.940747	0.921668	0.907579	0.89828	0.888721	0.881163	0.880578	0.877626	0.875028	0.865048	0.863667	0.856092	0.852601
col_cm	1.01749	1.02341	1.02354	1.00402	1.0124	1.02227	1.02406	1.04358	1.05925	1.06568	1.06372	1.06492	1.07342	1.06566	1.05332	1.04018	1.02987	1.00843	0.996116	0.980292	0.959028	0.948648	0.935626	0.92684	0.910289	0.906756	0.895323	0.886663	0.877419	0.873174	0.869506	0.865209	0.862363	0.856529	0.848849	0.850446	0.848982	0.843951	0.837349	0.832758	0.832518
col_cm	1.00306	1.00672	1.00976	1.01607	1.0163	1.00688	1.00422	0.97609	0.988518	1.01108	1.01046	1.00997	1.01586	1.0146	1.02118	1.02432	1.0174	1.01259	1.00406	0.991813	0.976585	0.960126	0.942483	0.927574	0.908196	0.893473	0.881137	0.869534	0.858643	0.852236	0.846702	0.841723	0.834188	0.827782	0.826003	0.821823	0.817239	0.809906	0.810832	0.80794	0.800455
col_cm	0.999942	0.999136	0.997456	1.00073	0.999182	0.995056	1.00099	1.00025	0.997187	0.996516	0.996479	0.994424	0.992081	0.992867	0.994888	0.990871	0.98499	0.990252	0.991045	1.00942	1.01503	1.01546	1.01157	0.998689	0.991133	0.972928	0.958988	0.946648	0.929307	0.91916	0.902009	0.890804	0.880762	0.87199	0.865802	0.854256	0.849739	0.839554	0.839498	0.838686	0.823681
col_cm	1.01301	1.02041	1.02093	1.0233	1.03304	1.04012	1.03855	1.04047	1.04307	1.04758	1.04637	1.04747	1.05045	1.05152	1.06301	1.0694	1.07518	1.07054	1.07009	1.06676	1.05955	1.04401	1.02102	1.00443	0.980566	0.957261	0.940704	0.924108	0.912961	0.899821	0.89011	0.878731	0.870321	0.859161	0.853596	0.845135	0.839022	0.832496	0.832942	0.828621	0.825918
col_cm	0.993975	0.994665	0.998792	1.00544	1.00539	1.00709	1.00967	1.01264	1.01614	1.02056	1.01864	1.0228	1.03022	1.03184	1.03875	1.04639	1.05699	1.05485	1.05683	1.05197	1.04415	1.03696	1.02493	1.01416	1.00322	0.987774	0.966399	0.947554	0.929526	0.917936	0.903828	0.895752	0.886634	0.877703	0.87439	0.872857	0.867446	0.855802	0.855331	0.847486	0.839688
col_cm	0.98642	0.993447	0.994281	0.994106	0.997781	0.997897	0.996384	1.0024	1.00129	0.995507	1.00207	1.00324	1.00305	1.0126	1.01794	1.02784	1.03295	1.03759	1.03626	1.0285	1.0196	1.00475	0.991408	0.980658	0.968622	0.956028	0.942006	0.936769	0.924808	0.918787	0.909407	0.905631	0.896234	0.890806	0.87943	0.871309	0.870987	0.868252	0.865681	0.865502	0.862614
col_cm	1.01702	1.01717	1.01991	1.02116	1.02634	1.03081	1.03103	1.0313	1.03215	1.0312	1.03437	1.03805	1.0395	1.0448	1.05255	1.05624	1.06601	1.0733	1.0741	1.0681	1.06117	1.05526	1.05003	1.03183	1.01519	0.999476	0.982088	0.971687	0.958478	0.944106	0.932538	0.921088	0.909128	0.89666	0.89091	0.878586	0.872342	0.865804	0.855428	0.857962	0.848104
col_cm	0.998112	1.00309	1.00604	1.00581	1.01451	1.01969	1.02557	1.02602	1.02928	1.03116	1.03305	1.0337	1.03964	1.05151	1.0589	1.0649	1.06514	1.05798	1.05346	1.0613	1.06075	1.05545	1.0425	1.02768	1.0129	0.994093	0.97418	0.958989	0.936317	0.933243	0.922473	0.908963	0.898377	0.888778	0.879369	0.873688	0.866102	0.858548	0.849742	0.846555	0.839868
col_cm	0.991148	0.998575	1.00151	1.00389	1.01321	1.00365	1.00585	1.00626	1.00324	1.00762	1.00893	1.01062	1.00662	1.0109	1.00938	1.01154	1.01404	1.01846	1.02277	1.02598	1.03515	1.04336	1.05347	1.05637	1.05819	1.05835	1.05399	1.04866	1.04059	1.02312	1.00534	0.994377	0.968737	0.949368	0.933116	0.915265	0.894534	0.882941	0.875548	0.872051	0.864045
col_cm	0.998812	1.00324	1.0145	1.01967	1.01758	1.01576	1.02289	1.02476	1.02782	1.02772	1.03561	1.04481	1.05205	1.0598	1.07246	1.07624	1.08924	1.09906	1.10559	1.10653	1.1094	1.11238	1.09998	1.08132	1.06172	1.03612	1.02292	0.995772	0.972743	0.956551	0.9448	0.93183	0.926977	0.913317	0.900442	0.891342	0.88633	0.876247	0.867773	0.861385	0.858391
col_cm	0.988844	0.995474	0.998242	0.999523	1.00157	1.00633	1.01075	1.01189	1.02464	1.02686	1.02161	1.00313	1.00581	1.02033	1.03155	1.03665	1.02745	1.02141	1.01315	1.0062	0.995521	0.991533	0.979067	0.970952	0.964745	0.954936	0.945723	0.939949	0.932813	0.926832	0.922418	0.915114	0.909849	0.90517	0.898951	0.893023	0.887659	0.882531	0.882433	0.880318	0.872647
col_cm	1.01432	1.02099	1.02413	1.03595	1.04517	1.04827	1.06057	1.06479	1.06801	1.0807	1.08754	1.09528	1.10417	1.11312	1.12375	1.12845	1.13408	1.12482	1.11966	1.10799	1.10013	1.08823	1.07545	1.06017	1.05097	1.02807	1.00901	0.987963	0.958963	0.93792	0.922842	0.915926	0.907954	0.892915	0.882482	0.866983	0.858345	0.850692	0.842647	0.834643	0.833828
col_cm	1.01823	1.0229	1.02804	1.03075	1.03169	1.03571	1.0385	1.04125	1.04388	1.05528	1.05679	1.06249	1.06958	1.07002	1.07175	1.0641	1.07234	1.07086	1.07164	1.07493	1.09176	1.08479	1.06652	1.04529	1.02942	1.01358	1.00156	0.990906	0.974454	0.957313	0.946178	0.937089	0.924473	0.912653	0.906957	0.898477	0.893964	0.887801	0.886219	0.880113	0.872149
col_cm	0.993124	1.00174	1.00147	1.00535	1.00653	1.01068	1.01419	1.02335	1.02638	1.02915	1.03775	1.04692	1.05383	1.06344	1.07566	1.08845	1.09807	1.10393	1.09963	1.09789	1.09077	1.0797	1.0565	1.02712	1.01649	0.996344	0.970065	0.953458	0.942286	0.923683	0.920457	0.905264	0.895677	0.88205	0.86999	0.865468	0.85696	0.855406	0.845745	0.838274	0.832337
cngc_cm	0.979439	0.982093	0.979723	0.98615	0.9889	0.991605	0.99595	0.994878	0.987249	0.975917	0.974962	0.983025	0.992647	0.990473	0.984717	1.01483	1.02123	1.01672	1.0097	1.0064	0.991716	0.977515	0.966394	0.957371	0.952634	0.939918	0.935439	0.932783	0.927211	0.915858	0.911347	0.906572	0.897596	0.892079	0.884804	0.876715	0.871079	0.866601	0.859087	0.848503	0.84831
cngc_cm	0.957236	0.956276	0.957781	0.959363	0.958736	0.96594	0.964751	0.962167	0.963902	0.958749	0.960189	0.957613	0.962161	0.956814	0.954474	0.954158	0.952477	0.949313	0.943679	0.94331	0.936016	0.928311	0.920444	0.915394	0.905282	0.897665	0.892082	0.886658	0.881696	0.876298	0.868721	0.860794	0.862668	0.861349	0.852416	0.846186	0.849728	0.843646	0.842835	0.84004	0.838457
cngc_cm	0.971504	0.980415	0.983804	0.983891	0.987268	0.987609	0.988758	0.991071	0.993718	0.996068	1.00494	1.00253	0.997831	0.998241	1.00244	1.00625	1.01011	1.00543	0.998437	0.994648	0.981612	0.968139	0.953549	0.927276	0.941753	0.936962	0.927642	0.918919	0.912252	0.906106	0.898337	0.891399	0.88703	0.875019	0.866788	0.861218	0.853814	0.850003	0.844323	0.844053	0.834101
cngc_cm	0.95556	0.958843	0.962027	0.965448	0.962019	0.964342	0.961811	0.965325	0.961705	0.959601	0.959395	0.958789	0.957807	0.957229	0.961342	0.956828	0.954198	0.955445	0.952319	0.94948	0.948745	0.941662	0.937432	0.932698	0.926383	0.920122	0.913156	0.907846	0.901087	0.88997	0.876402	0.873163	0.87339	0.859905	0.857112	0.853032	0.84709	0.845717	0.830721	0.832	0.828847
cngc_cm	0.953818	0.954942	0.958441	0.958982	0.95837	0.962087	0.960311	0.960739	0.959042	0.964373	0.962376	0.962092	0.967113	0.965563	0.968065	0.966778	0.967759	0.964426	0.962648	0.961282	0.955716	0.95245	0.942706	0.933261	0.923458	0.917434	0.91079	0.901216	0.897832	0.885047	0.878299	0.871033	0.860985	0.85865	0.854948	0.84689	0.840764	0.838298	0.830792	0.824006	0.823577
cngc_cm	0.964987	0.962982	0.956765	0.960912	0.937365	0.945949	0.97136	0.970076	0.966862	0.962318	0.959676	0.955198	0.953856	0.954529	0.956572	0.957375	0.955015	0.950985	0.944654	0.930292	0.919435	0.911112	0.904361	0.89921	0.889426	0.874178	0.865155	0.856257	0.849182	0.841504	0.834888	0.82759	0.829722	0.822458	0.824242	0.816375	0.814101	0.811736	0.804921	0.807274	0.809354
cngc_cm	0.966313	0.964943	0.964591	0.97044	0.978338	0.983104	0.985697	0.985322	0.983208	0.976671	0.962429	0.965873	0.967684	0.966929	0.965243	0.964281	0.963292	0.960525	0.955694	0.953339	0.941963	0.931964	0.923044	0.912845	0.902861	0.898379	0.888607	0.882796	0.876069	0.866848	0.860531	0.855624	0.847245	0.841338	0.834396	0.830155	0.821674	0.816455	0.817237	0.819286	0.817567
cngc_cm	0.962709	0.963699	0.96388	0.962608	0.965122	0.972805	0.971496	0.970385	0.97684	0.968946	0.96636	0.969046	0.973945	0.969979	0.968604	0.969194	0.967464	0.969657	0.97083	0.965969	0.96381	0.955886	0.948687	0.937314	0.928723	0.92072	0.912195	0.90833	0.900326	0.894112	0.892128	0.884114	0.872183	0.870065	0.861415	0.85932	0.854323	0.849132	0.837897	0.833094	0.832427
cngc_cm	0.954601	0.96172	0.962523	0.972671	0.972868	0.96563	0.971417	0.967388	0.967805	0.972522	0.966088	0.970622	0.968136	0.963777	0.963825	0.964238	0.956647	0.947623	0.942164	0.934541	0.924775	0.915004	0.906764	0.899428	0.891031	0.883964	0.874428	0.87055	0.861835	0.858489	0.853722	0.852567	0.84611	0.838972	0.832862	0.828663	0.828799	0.822382	0.819043	0.816339	0.809128
cngc_cm	0.864198	0.864051	0.86842	0.870774	0.867889	0.867287	0.873917	0.871003	0.871989	0.874646	0.877636	0.878218	0.886166	0.888626	0.890093	0.894962	0.898774	0.901301	0.901705	0.897584	0.893705	0.885858	0.87629	0.865244	0.85233	0.837429	0.83285	0.828485	0.825266	0.79838	0.76266	0.760856	0.79101	0.797301	0.794291	0.792333	0.785621	0.778579	0.770408	0.768124	0.763766
cngc_cm	0.879391	0.875746	0.885323	0.880275	0.885965	0.882396	0.88465	0.889224	0.88341	0.882882	0.889898	0.885121	0.883352	0.888806	0.89225	0.886895	0.882348	0.881742	0.875252	0.870439	0.865815	0.851527	0.839287	0.837165	0.830119	0.822307	0.81492	0.776742	0.79192	0.795454	0.790474	0.784536	0.777813	0.774027	0.773288	0.771165	0.76796	0.761164	0.75333	0.751495	0.74691
cngc_cm	0.878302	0.88079	0.883995	0.885361	0.885181	0.885602	0.885647	0.88764	0.874244	0.86659	0.864808	0.867287	0.870662	0.87633	0.873548	0.8771	0.877895	0.874181	0.86874	0.865103	0.857461	0.859264	0.852663	0.846619	0.841299	0.833253	0.829164	0.82691	0.815367	0.809327	0.804678	0.797712	0.792982	0.792138	0.785019	0.783041	0.775734	0.769438	0.76509	0.762784	0.755763
cngc_cm	0.892825	0.893902	0.891959	0.8893	0.889579	0.893376	0.890413	0.895782	0.895796	0.900193	0.895247	0.882834	0.876677	0.879372	0.881984	0.879475	0.879214	0.879346	0.875931	0.873575	0.865327	0.861652	0.856149	0.848659	0.844824	0.837406	0.82947	0.818997	0.8091	0.800849	0.796388	0.791646	0.782642	0.780675	0.776558	0.775266	0.770228	0.769415	0.769869	0.768316	0.765766
cngc_cm	0.896908	0.896909	0.900322	0.899169	0.898887	0.901728	0.907837	0.908677	0.908464	0.910539	0.917374	0.917618	0.917651	0.920154	0.917827	0.919807	0.901379	0.885014	0.869178	0.854488	0.846791	0.84175	0.841892	0.834943	0.830808	0.826725	0.824658	0.816795	0.812581	0.805415	0.797579	0.795524	0.788566	0.786903	0.779297	0.778038	0.772385	0.77186	0.767154	0.761959	0.751254
cngc_cm	0.885833	0.889038	0.892418	0.889933	0.891653	0.886237	0.887853	0.890404	0.889491	0.886112	0.886742	0.886128	0.886827	0.886014	0.884524	0.885328	0.881752	0.884173	0.882892	0.882892	0.881329	0.877698	0.871706	0.86877	0.860046	0.853458	0.845269	0.840095	0.829826	0.821813	0.812079	0.803276	0.796897	0.791973	0.788867	0.786449	0.783408	0.773318	0.766545	0.76562	0.761522
cngc_cm	0.892164	0.889577	0.886587	0.889732	0.891584	0.896333	0.898771	0.895401	0.895069	0.88356	0.878561	0.879144	0.88195	0.891034	0.895005	0.893876	0.889003	0.885732	0.880488	0.871135	0.862588	0.855255	0.841893	0.831168	0.822297	0.809019	0.801679	0.790875	0.786623	0.778174	0.771307	0.764612	0.757254	0.752801	0.746787	0.746182	0.741493	0.741243	0.732942	0.733402	0.733154
cngc_cm	0.874404	0.878935	0.886661	0.889194	0.890244	0.896359	0.892148	0.890476	0.89585	0.895105	0.895998	0.900988	0.897468	0.900332	0.89686	0.896671	0.895217	0.894768	0.887155	0.886089	0.883893	0.870222	0.868465	0.860618	0.853917	0.84988	0.844965	0.839178	0.831979	0.824946	0.817493	0.816079	0.814287	0.811386	0.807689	0.806693	0.802602	0.79824	0.797085	0.7973	0.795639
cngc_cm	0.877191	0.879505	0.877496	0.875789	0.875045	0.867373	0.851075	0.875464	0.884952	0.88878	0.886921	0.890046	0.880658	0.873273	0.872731	0.872661	0.868927	0.863978	0.863693	0.856896	0.845022	0.839597	0.833878	0.830068	0.82185	0.815418	0.808267	0.802531	0.794324	0.791173	0.784212	0.779518	0.774383	0.772565	0.768301	0.761798	0.759961	0.757543	0.757177	0.753534	0.751987
cngc_cm	0.881649	0.885401	0.887664	0.88422	0.886093	0.888317	0.890625	0.889853	0.895402	0.889151	0.887778	0.883484	0.885367	0.878133	0.870582	0.867123	0.864026	0.856041	0.845758	0.845398	0.83453	0.829885	0.821537	0.81588	0.806288	0.802352	0.793954	0.787048	0.782305	0.779814	0.779376	0.779562	0.782069	0.779673	0.7749	0.77011	0.771602	0.774712	0.772681	0.776883	0.776053
cngc_cm	0.972825	0.975173	0.982474	0.977904	0.976189	0.974089	0.971249	0.972147	0.970374	0.969274	0.961579	0.959733	0.953405	0.943596	0.945212	0.941779	0.943721	0.945644	0.94119	0.942515	0.942514	0.941263	0.941163	0.940525	0.938042	0.93452	0.932889	0.927529	0.915613	0.905026	0.894958	0.883865	0.874618	0.865882	0.860374	0.848869	0.837431	0.829233	0.824555	0.817276	0.811843
cngc_cm	0.971988	0.974137	0.975339	0.977603	0.977988	0.973164	0.96814	0.960728	0.961527	0.964745	0.965137	0.959941	0.967676	0.961097	0.966024	0.96795	0.962024	0.958012	0.95673	0.949727	0.943212	0.930783	0.923025	0.907901	0.892	0.879789	0.869237	0.856502	0.848941	0.838843	0.828166	0.825948	0.818571	0.813481	0.807115	0.804255	0.804499	0.80274	0.802361	0.797155	0.798962
cngc_cm	0.960794	0.964306	0.965438	0.966612	0.962059	0.966561	0.96248	0.96562	0.965051	0.963299	0.958325	0.953404	0.9534	0.959474	0.963969	0.961906	0.960707	0.9569	0.942105	0.939549	0.931004	0.918986	0.910097	0.905681	0.895682	0.888566	0.878689	0.872375	0.855005	0.847282	0.843026	0.830038	0.826843	0.821926	0.812188	0.803829	0.797931	0.797268	0.797418	0.798918	0.794135
cngc_cm	0.997105	1.00294	0.999294	1.00098	1.00055	1.0017	0.98663	0.975099	0.972388	0.972967	0.96319	0.969957	0.971974	0.969834	0.963914	0.960166	0.959768	0.962339	0.957732	0.950737	0.940231	0.930647	0.924126	0.917748	0.903464	0.896228	0.886824	0.873446	0.863905	0.857162	0.849523	0.841933	0.841797	0.833702	0.825528	0.82115	0.818873	0.817334	0.814328	0.809644	0.809737
cngc_cm	0.959001	0.963935	0.952596	0.948627	0.95424	0.958899	0.960261	0.963416	0.964451	0.95615	0.954441	0.954702	0.958588	0.958327	0.963502	0.962203	0.966487	0.963645	0.96115	0.952104	0.9417	0.932659	0.919435	0.910858	0.898613	0.884115	0.876281	0.868768	0.86102	0.853288	0.848687	0.838528	0.834294	0.822296	0.821079	0.81827	0.811788	0.81005	0.806161	0.809583	0.806323
cngc_cm	0.954832	0.960908	0.961645	0.965466	0.961407	0.961375	0.96367	0.959588	0.96408	0.963962	0.962637	0.963003	0.967205	0.968118	0.971344	0.972175	0.975329	0.971264	0.967296	0.953478	0.95548	0.952889	0.94175	0.930356	0.914724	0.901964	0.886948	0.874597	0.863463	0.855662	0.846401	0.842138	0.837058	0.833557	0.828465	0.824782	0.819654	0.816411	0.812569	0.805316	0.803809
cngc_cm	0.976528	0.980023	0.979592	0.979976	0.981717	0.977918	0.976405	0.973296	0.967683	0.971534	0.97251	0.969619	0.968105	0.976557	0.978221	0.978045	0.972937	0.967749	0.962461	0.955948	0.951123	0.946734	0.934105	0.919372	0.905761	0.891963	0.887428	0.872646	0.861769	0.852719	0.846766	0.842638	0.836269	0.829402	0.82471	0.823135	0.821141	0.814054	0.820441	0.814727	0.813508
cngc_cm	0.977947	0.985534	0.986131	0.984806	0.986392	0.989309	0.984983	0.982499	0.977761	0.979335	0.978813	0.976778	0.973948	0.96734	0.964647	0.969199	0.961916	0.958785	0.957143	0.963671	0.955976	0.947182	0.940101	0.935976	0.926448	0.920094	0.909089	0.904224	0.886337	0.876218	0.870658	0.863919	0.851429	0.84576	0.839546	0.831714	0.825541	0.821581	0.81731	0.810812	0.802617
cngc_cm	1.00428	1.01246	1.01378	1.02289	1.02152	1.02347	1.02889	1.02232	1.02022	1.01341	1.0019	0.997669	0.988486	0.989127	1.00426	1.01496	1.01174	1.00967	1.0006	0.993272	0.989503	0.981722	0.973194	0.964551	0.952232	0.941168	0.931936	0.917024	0.907249	0.891165	0.883145	0.869792	0.859584	0.852907	0.850235	0.839591	0.831313	0.82394	0.82366	0.827291	0.816502
cngc_cm	1.00167	1.00826	1.00812	1.0106	1.01127	1.01457	1.00888	1.0032	0.99629	0.997702	0.994487	0.988202	0.989542	0.982528	0.984378	0.987586	0.984634	0.982	0.977567	0.970244	0.955798	0.943549	0.931803	0.918594	0.907061	0.897182	0.888991	0.87445	0.864206	0.856878	0.850974	0.843946	0.841007	0.831182	0.827599	0.827334	0.824797	0.821818	0.817571	0.815702	0.821385
cngc_cm	1.00152	1.0099	1.00964	1.01004	1.01664	1.0156	1.02055	1.02119	1.01376	1.00472	1.00411	1.00152	0.997066	1.0118	1.01469	1.02143	1.03129	1.02421	1.01609	1.00369	0.993926	0.982738	0.96095	0.951561	0.93843	0.927961	0.916958	0.909977	0.898702	0.889917	0.882473	0.872461	0.860079	0.852455	0.849559	0.83823	0.826748	0.822418	0.818714	0.810497	0.807934
cngc_cm	0.971985	0.973816	0.974829	0.97962	0.978442	0.975912	0.977922	0.983154	0.977188	0.973268	0.965474	0.9581	0.952079	0.952448	0.956065	0.952644	0.947333	0.947147	0.944347	0.94275	0.9423	0.93814	0.9393	0.936786	0.928455	0.925324	0.91721	0.912776	0.900102	0.88993	0.884614	0.873794	0.868654	0.85516	0.846451	0.837165	0.828856	0.822527	0.819822	0.813645	0.81253
cngc_cm	0.961667	0.963009	0.966938	0.974785	0.978123	0.98162	0.98091	0.982725	0.981242	0.977549	0.970555	0.970886	0.97126	0.968208	0.954308	0.93988	0.928034	0.914902	0.900018	0.884655	0.873101	0.856654	0.843395	0.838139	0.828587	0.819498	0.815992	0.811223	0.808697	0.80463	0.797503	0.796449	0.79508	0.798926	0.792767	0.79923	0.798203	0.798085	0.799141
cngc_cm	0.959688	0.966356	0.967599	0.968742	0.969058	0.969779	0.969685	0.964215	0.962785	0.958417	0.954314	0.953422	0.948999	0.952359	0.950368	0.94817	0.947088	0.942297	0.939307	0.940052	0.934901	0.929086	0.930297	0.922729	0.913832	0.909048	0.89959	0.892505	0.885887	0.874009	0.865688	0.857906	0.847945	0.844646	0.837447	0.838703	0.826161	0.817505	0.809395	0.803947	0.800001
cngc_cm	0.963558	0.97247	0.968283	0.974601	0.980447	0.976935	0.980941	0.978234	0.975328	0.968204	0.961289	0.958282	0.958073	0.954996	0.951335	0.950066	0.942793	0.940866	0.933263	0.933113	0.931301	0.929953	0.926727	0.92407	0.918466	0.906393	0.899778	0.893922	0.890266	0.885705	0.876917	0.866521	0.85894	0.861755	0.85948	0.850858	0.843851	0.838658	0.831524	0.821529	0.81605
cngc_cm	0.967839	0.966873	0.970145	0.976724	0.979677	0.982839	0.982459	0.98174	0.979043	0.977396	0.981097	0.977926	0.971258	0.966603	0.96898	0.965334	0.966706	0.95612	0.948413	0.936478	0.92574	0.915649	0.90645	0.895844	0.886051	0.874875	0.864643	0.857671	0.851052	0.840901	0.83891	0.83531	0.832707	0.830696	0.826843	0.828095	0.819759	0.818573	0.821029	0.820743	0.82088
cngc_cm	0.959475	0.96133	0.959758	0.96395	0.966958	0.965026	0.957218	0.953649	0.950418	0.944986	0.945881	0.938023	0.929862	0.919818	0.917863	0.914881	0.925354	0.924167	0.927251	0.921112	0.919831	0.913	0.903983	0.893875	0.879087	0.87341	0.861021	0.853843	0.843899	0.83282	0.823787	0.817442	0.810338	0.80387	0.801754	0.790948	0.78834	0.785627	0.783907	0.78203	0.780819
cngc_cm	0.943082	0.946639	0.942712	0.944138	0.946236	0.945273	0.945655	0.935889	0.933855	0.933954	0.934822	0.925416	0.92297	0.92212	0.914695	0.913119	0.9102	0.911021	0.907804	0.905388	0.900065	0.895254	0.888084	0.888912	0.880535	0.867495	0.861587	0.852202	0.846437	0.838165	0.831751	0.823043	0.8146	0.806973	0.801989	0.799459	0.793087	0.78514	0.784366	0.781252	0.779262
cngc_cm	0.969632	0.970917	0.97469	0.974814	0.972643	0.973265	0.97488	0.984777	0.996116	1.00202	1.01651	1.01145	1.01506	1.01796	1.01563	1.01489	0.998902	0.987252	0.977846	0.965533	0.953863	0.937147	0.92577	0.915692	0.904327	0.89361	0.878945	0.873024	0.866918	0.858699	0.853005	0.841585	0.834191	0.829119	0.819128	0.810616	0.811788	0.806311	0.805219	0.796722	0.795764
cngc_cm	0.95946	0.968555	0.967307	0.952841	0.956749	0.952535	0.960308	0.966198	0.958602	0.957608	0.946464	0.940355	0.943133	0.951362	0.950667	0.949944	0.947749	0.940468	0.935603	0.930826	0.92524	0.917926	0.910287	0.901196	0.895223	0.883484	0.874713	0.866122	0.856982	0.850095	0.836801	0.830862	0.828071	0.81812	0.809652	0.804536	0.804098	0.8018	0.797549	0.795256	0.792286
cngc_cm	0.958822	0.957233	0.960821	0.967828	0.962942	0.963806	0.962952	0.963973	0.966616	0.968286	0.97025	0.971528	0.975099	0.977795	0.978176	0.988884	0.996829	0.997333	0.99964	0.996039	0.995309	0.992903	0.987254	0.972458	0.959029	0.950989	0.941924	0.936297	0.923717	0.919386	0.912774	0.904341	0.898052	0.890328	0.885427	0.876588	0.870339	0.863756	0.859606	0.851135	0.84559
cngc_cm	0.959566	0.96739	0.971444	0.967006	0.967589	0.969367	0.971493	0.969085	0.967461	0.965633	0.963127	0.961325	0.964136	0.971211	0.976505	0.981555	0.985427	0.989042	0.986732	0.987372	0.981254	0.971985	0.96841	0.952757	0.948502	0.9405	0.933758	0.926614	0.918047	0.910827	0.899176	0.893217	0.884122	0.875271	0.866083	0.861273	0.8519	0.84586	0.838517	0.836752	0.833353
cngc_cm	0.968511	0.975083	0.971895	0.975761	0.977533	0.980387	0.980242	0.975611	0.974366	0.972657	0.968931	0.967314	0.970184	0.9722	0.972925	0.974103	0.973421	0.965492	0.962842	0.970039	0.967946	0.960833	0.962171	0.963306	0.951188	0.940553	0.928494	0.915647	0.909471	0.898522	0.885187	0.876147	0.863817	0.856181	0.846198	0.83592	0.82957	0.820445	0.816136	0.811711	0.806322
cngc_cm	0.949106	0.9552	0.956771	0.952116	0.951798	0.950825	0.949321	0.944769	0.939999	0.935768	0.936662	0.931078	0.933117	0.929953	0.926018	0.91896	0.916674	0.917718	0.922531	0.91773	0.919112	0.920472	0.912246	0.907181	0.896633	0.891565	0.878819	0.869123	0.862966	0.856355	0.844127	0.837745	0.831555	0.825351	0.81939	0.822296	0.812364	0.804987	0.805097	0.802807	0.80162
cngc_cm	0.958045	0.962341	0.961947	0.96345	0.961307	0.960219	0.96165	0.966002	0.959972	0.956034	0.951954	0.953557	0.957209	0.957564	0.958797	0.953065	0.948823	0.946374	0.939787	0.931996	0.924869	0.91996	0.913701	0.897076	0.893453	0.889283	0.88168	0.872766	0.863606	0.854184	0.853054	0.841652	0.831725	0.828829	0.823562	0.827665	0.82252	0.821385	0.819025	0.811364	0.81215
cngc_cm	0.946078	0.942745	0.952395	0.949175	0.952124	0.952258	0.953467	0.947575	0.947738	0.948469	0.945332	0.940567	0.940574	0.9395	0.937166	0.933163	0.93636	0.940118	0.940689	0.93729	0.934842	0.929772	0.924219	0.917437	0.910533	0.901398	0.892621	0.886419	0.873651	0.870818	0.861106	0.860352	0.852309	0.846126	0.841758	0.837394	0.831733	0.821809	0.816942	0.813421	0.811044
cngc_cm	0.948396	0.948075	0.949772	0.948953	0.942218	0.946337	0.943129	0.938338	0.935609	0.937535	0.924513	0.92392	0.922489	0.920832	0.924319	0.921026	0.921469	0.920693	0.920568	0.922064	0.91736	0.913418	0.907197	0.904548	0.895855	0.892379	0.879396	0.875494	0.868523	0.856793	0.845343	0.836314	0.831657	0.825036	0.82195	0.814815	0.81439	0.81	0.808133	0.806958	0.806852
cngc_cm	0.983134	0.984696	0.98859	0.994865	0.995641	0.994499	0.993483	0.995858	0.994209	0.992557	0.984246	0.979694	0.973816	0.971946	0.971026	0.96695	0.966484	0.959451	0.960539	0.958646	0.957519	0.957949	0.959526	0.954645	0.958695	0.958354	0.955233	0.943455	0.935286	0.925957	0.920053	0.91751	0.909867	0.901776	0.894437	0.884245	0.86672	0.858341	0.853959	0.849839	0.84992
cngc_cm	0.960572	0.960123	0.96485	0.967996	0.964792	0.960494	0.964806	0.964916	0.961982	0.962936	0.964257	0.954339	0.958471	0.960458	0.959001	0.959495	0.956551	0.952082	0.947605	0.942578	0.939649	0.927973	0.912982	0.90562	0.887068	0.879154	0.873766	0.863771	0.859294	0.849334	0.84259	0.833593	0.83337	0.832688	0.833626	0.82678	0.825461	0.821293	0.82023	0.820988	0.82126
cngc_cm	0.950986	0.954105	0.953068	0.961715	0.959956	0.954802	0.952476	0.952497	0.951064	0.947137	0.942208	0.940407	0.941827	0.937979	0.939748	0.943534	0.947527	0.946331	0.95057	0.944847	0.941016	0.917329	0.908281	0.908077	0.899638	0.891206	0.889133	0.884175	0.876202	0.869788	0.860784	0.857353	0.854192	0.841	0.830993	0.832032	0.824626	0.826994	0.839258	0.828186	0.820694
cngcomp_cm	0.993511	0.997511	1.00572	1.0061	1.01725	1.02446	1.03035	1.04176	1.0535	1.05758	1.07219	1.08479	1.09811	1.11184	1.13429	1.14945	1.16586	1.17091	1.17178	1.16783	1.1477	1.12485	1.1072	1.07816	1.05018	1.01688	0.990823	0.967207	0.94384	0.925335	0.916392	0.910042	0.90095	0.893386	0.884579	0.875738	0.85555	0.852576	0.849921	0.852146	0.844521
cngcomp_cm	1.00816	1.02244	1.03192	1.04472	1.05206	1.05939	1.07203	1.08478	1.09036	1.10594	1.12077	1.13345	1.14904	1.14722	1.13675	1.11328	1.07691	1.06325	1.08148	1.0713	1.03062	0.998621	0.96724	0.943081	0.928595	0.912586	0.899564	0.889522	0.886436	0.878149	0.868982	0.862422	0.861996	0.861046	0.857076	0.852964	0.849989	0.845525	0.846008	0.841439	0.837672
cngcomp_cm	0.998069	1.00096	1.0115	1.02168	1.02749	1.03791	1.04855	1.04529	1.03841	1.05994	1.06887	1.07929	1.09932	1.11428	1.1315	1.14624	1.15181	1.1462	1.14067	1.12236	1.0945	1.06463	1.04004	1.01226	0.982706	0.961431	0.93917	0.920895	0.909936	0.89899	0.888473	0.881137	0.879496	0.871359	0.865101	0.86023	0.853443	0.847079	0.84016	0.836118	0.829251
cngcomp_cm	0.998876	1.00082	1.00731	1.01633	1.01943	1.03282	1.03374	1.03773	1.05437	1.06077	1.07333	1.08456	1.09803	1.11646	1.12532	1.13663	1.1472	1.14393	1.12756	1.10677	1.07845	1.04918	1.01975	0.991291	0.965218	0.945777	0.926382	0.911318	0.905139	0.893762	0.88183	0.868349	0.863867	0.857158	0.852609	0.843646	0.837853	0.833442	0.823289	0.815339	0.810468
cngcomp_cm	1.01476	1.01237	1.01805	1.02148	1.03597	1.05084	1.06034	1.06855	1.08333	1.09469	1.10618	1.12106	1.1264	1.13873	1.13414	1.12272	1.10789	1.07871	1.04663	1.01935	0.990667	0.962518	0.947464	0.932968	0.92247	0.910903	0.906081	0.901209	0.896305	0.893933	0.886795	0.885962	0.882521	0.877523	0.874662	0.875554	0.870331	0.862482	0.862131	0.855471	0.856663
cngcomp_cm	1.04564	1.04719	1.04561	1.04978	1.06403	1.08132	1.10946	1.12339	1.13155	1.12767	1.14308	1.15948	1.17732	1.19598	1.20335	1.21438	1.20638	1.19615	1.17189	1.14568	1.1231	1.0923	1.06521	1.03982	1.01915	0.998785	0.986297	0.969172	0.957561	0.946324	0.936677	0.934459	0.92282	0.920324	0.91106	0.906682	0.89596	0.888414	0.889953	0.890073	0.886393
cngcomp_cm	1.05299	1.05699	1.0664	1.07662	1.07793	1.08981	1.08666	1.08057	1.08945	1.10013	1.12031	1.14223	1.16442	1.17522	1.18503	1.19292	1.19273	1.18393	1.16396	1.13894	1.11107	1.08597	1.06004	1.0407	1.02202	1.00039	0.97808	0.962593	0.94739	0.941161	0.929109	0.922719	0.91681	0.908593	0.903518	0.892107	0.891755	0.884013	0.88411	0.886581	0.885013
cngcomp_cm	1.02096	1.02356	1.02919	1.03487	1.03929	1.04815	1.05298	1.06028	1.05986	1.05766	1.09686	1.12121	1.13338	1.14199	1.16053	1.17329	1.17358	1.17377	1.14069	1.10795	1.07393	1.03441	1.00056	0.975796	0.956087	0.936648	0.9174	0.907586	0.897168	0.885023	0.885609	0.881709	0.879251	0.87391	0.860569	0.86065	0.858176	0.847979	0.846024	0.842899	0.836552
cngcomp_cm	1.05142	1.05563	1.06496	1.07176	1.08165	1.09392	1.10834	1.11959	1.12806	1.13457	1.14963	1.162	1.17445	1.17741	1.17915	1.18821	1.18805	1.18442	1.18235	1.1608	1.12042	1.08406	1.05641	1.0306	1.00441	0.984699	0.965799	0.952881	0.94192	0.932979	0.93013	0.922547	0.909948	0.907393	0.906126	0.903101	0.901652	0.889924	0.881228	0.878579	0.873947
cngcomp_cm	1.06322	1.05849	1.06784	1.06395	1.06908	1.09161	1.10058	1.11138	1.11882	1.12857	1.12984	1.1485	1.15427	1.16905	1.17546	1.17955	1.17325	1.16175	1.14325	1.11603	1.08355	1.04852	1.0255	1.00285	0.981211	0.965402	0.952504	0.942308	0.933127	0.930296	0.925613	0.916217	0.90823	0.898961	0.892759	0.894114	0.893754	0.890849	0.883442	0.884874	0.881493
cngcomp_cm	0.906458	0.906288	0.912119	0.918758	0.931985	0.942678	0.955755	0.968005	0.980474	0.990604	1.00468	1.01813	1.02855	1.04414	1.0605	1.07134	1.08171	1.08732	1.08886	1.08432	1.07731	1.06086	1.02961	1.0032	0.970559	0.945034	0.91741	0.892818	0.875189	0.855906	0.843692	0.835081	0.824653	0.81344	0.80203	0.798119	0.791389	0.78747	0.7817	0.774041	0.767268
cngcomp_cm	0.893552	0.895446	0.901645	0.905375	0.914367	0.923229	0.925363	0.936896	0.949431	0.952889	0.962163	0.979572	0.989956	1.00812	1.02689	1.04271	1.05699	1.05349	1.06766	1.06504	1.05781	1.0408	1.0188	0.991447	0.965674	0.93788	0.908265	0.884063	0.864862	0.851072	0.84163	0.832133	0.829069	0.821919	0.817239	0.807786	0.79996	0.79369	0.791526	0.78837	0.782775
cngcomp_cm	0.901575	0.901244	0.906857	0.910343	0.912584	0.918203	0.923481	0.939729	0.943412	0.955422	0.959212	0.938261	0.94208	0.950548	0.967049	1.01056	1.03749	1.04289	1.03456	1.01858	0.993339	0.966555	0.937451	0.911357	0.890898	0.867991	0.849782	0.837189	0.82595	0.817728	0.806683	0.801753	0.795194	0.788361	0.78365	0.782285	0.784906	0.779642	0.776171	0.775748	0.77086
cngcomp_cm	0.90126	0.90347	0.906115	0.909994	0.919675	0.92715	0.940211	0.951754	0.966577	0.979741	0.989644	1.00186	1.01224	1.0154	1.01541	1.02586	1.02459	1.01105	0.980613	0.949197	0.913128	0.884307	0.857349	0.838617	0.828903	0.814586	0.807861	0.79819	0.790366	0.787923	0.781049	0.779029	0.776548	0.771476	0.76553	0.763963	0.764587	0.762509	0.759264	0.754304	0.752643
cngcomp_cm	0.884233	0.890157	0.894743	0.894481	0.897864	0.902327	0.905155	0.915982	0.926067	0.944476	0.95848	0.965123	0.975544	0.986879	0.999333	1.00324	1.01551	1.02006	1.03164	1.02229	1.00886	0.985574	0.961063	0.9389	0.915181	0.892821	0.869361	0.850789	0.833979	0.821642	0.806629	0.798661	0.792741	0.78473	0.785605	0.782463	0.777384	0.774586	0.771633	0.772297	0.765006
cngcomp_cm	0.915079	0.922017	0.923852	0.927392	0.931307	0.935563	0.944762	0.951727	0.956245	0.967081	0.97813	0.98597	0.998092	1.00864	1.01692	1.02998	1.04243	1.04584	1.05227	1.06268	1.05414	1.02443	1.02374	1.00759	0.982075	0.960072	0.937359	0.917425	0.895231	0.87853	0.857194	0.845951	0.838112	0.827166	0.818932	0.81621	0.808506	0.801943	0.797761	0.794028	0.79441
cngcomp_cm	0.905992	0.910715	0.909548	0.911447	0.910785	0.90502	0.910115	0.917073	0.939245	0.949743	0.967576	0.981826	0.995693	1.01059	1.02987	1.03874	1.04633	1.04296	1.03895	1.02419	1.00627	0.979439	0.947154	0.913757	0.885506	0.859543	0.84351	0.829977	0.821593	0.81341	0.8012	0.79436	0.792257	0.788788	0.782375	0.782915	0.77784	0.774316	0.770717	0.764792	0.761039
cngcomp_cm	0.903103	0.902277	0.888996	0.889025	0.901482	0.908293	0.914984	0.929436	0.939182	0.945862	0.951121	0.955491	0.950699	0.956693	0.953996	0.948362	0.937853	0.915579	0.893932	0.865704	0.833683	0.808824	0.79201	0.779714	0.766744	0.763348	0.763398	0.753941	0.751249	0.746595	0.737305	0.728471	0.722218	0.72788	0.725432	0.722867	0.721808	0.725901	0.730705	0.730828	0.734756
cngcomp_cm	0.882925	0.894435	0.904586	0.907212	0.91193	0.904312	0.916094	0.948869	0.958675	0.962671	0.948519	0.942162	0.922878	0.902614	0.885262	0.866443	0.839182	0.813134	0.794828	0.776528	0.772352	0.768918	0.758815	0.757285	0.754654	0.749369	0.751124	0.7472	0.751469	0.752222	0.754344	0.763269	0.771538	0.775802	0.779659	0.774604	0.783007	0.783809	0.787514	0.786342	0.775874
cngcomp_cm	1.01303	1.02259	1.03179	1.03715	1.04484	1.05464	1.06388	1.07903	1.08613	1.09727	1.10673	1.12633	1.14261	1.15352	1.15965	1.14704	1.1321	1.10646	1.06751	1.03157	0.991006	0.95822	0.930617	0.915737	0.901584	0.89052	0.883069	0.87583	0.872159	0.865998	0.862078	0.860457	0.864243	0.861773	0.862038	0.862942	0.866679	0.866754	0.868587	0.875462	0.876775
cngcomp_cm	1.03011	1.0363	1.03985	1.04932	1.05933	1.06486	1.07639	1.08252	1.09943	1.11509	1.12564	1.14012	1.16103	1.18787	1.19689	1.20116	1.21409	1.22717	1.21014	1.19054	1.16544	1.13541	1.10009	1.04827	1.00521	0.983613	0.962566	0.945136	0.933501	0.922302	0.914596	0.910311	0.903178	0.897481	0.894844	0.88737	0.886549	0.881793	0.883183	0.886724	0.885728
cngcomp_cm	1.03714	1.0399	1.045	1.04449	1.05078	1.05663	1.06947	1.08415	1.09919	1.1185	1.12386	1.1155	1.12688	1.14427	1.14274	1.13429	1.11564	1.09263	1.05777	1.02797	0.999635	0.977418	0.959456	0.947725	0.933294	0.926864	0.920534	0.915455	0.918898	0.905731	0.904987	0.9005	0.901625	0.896448	0.894354	0.89367	0.89184	0.892363	0.88947	0.890636	0.900265
cngcomp_cm	1.12204	1.12967	1.13839	1.14417	1.1498	1.15348	1.16556	1.1776	1.19174	1.22192	1.25678	1.28142	1.3096	1.33091	1.35018	1.36239	1.36388	1.35251	1.334	1.30191	1.27106	1.23815	1.20505	1.18033	1.15288	1.12992	1.11518	1.09193	1.07717	1.06614	1.06225	1.05729	1.05235	1.04314	1.04397	1.04618	1.04141	1.03659	1.03077	1.02882	1.01874
cngcomp_cm	0.991944	0.999532	1.01314	1.02167	1.02619	1.03481	1.04778	1.06378	1.07778	1.08702	1.10001	1.11175	1.13289	1.14838	1.15204	1.1576	1.14089	1.12598	1.09542	1.07094	1.03757	1.00966	0.98699	0.96946	0.948974	0.933057	0.923043	0.91287	0.904282	0.894759	0.889884	0.883817	0.880591	0.877334	0.879316	0.875951	0.868104	0.867039	0.86438	0.868659	0.869089
cngcomp_cm	0.962173	0.962034	0.960236	0.958008	0.967441	0.974403	0.98415	1.00081	1.01757	1.03712	1.05386	1.07335	1.07817	1.08181	1.07626	1.05671	1.03082	1.0002	0.97415	0.94439	0.925171	0.914314	0.901661	0.891873	0.87756	0.86786	0.86234	0.853328	0.849748	0.849779	0.853365	0.852346	0.851842	0.852457	0.85669	0.864061	0.868959	0.872704	0.868711	0.868085	0.870097
cngcomp_cm	0.990182	0.996101	0.990007	0.993821	1.00567	1.0142	1.01697	1.02567	1.03321	1.03909	1.04413	1.05903	1.07299	1.08738	1.09802	1.10073	1.08693	1.054	1.0183	0.985929	0.963214	0.939143	0.921728	0.907213	0.895079	0.886716	0.883879	0.878212	0.872947	0.875208	0.872369	0.873	0.873989	0.872262	0.874937	0.872566	0.872943	0.868368	0.872945	0.881635	0.887095
cngcomp_cm	0.989873	0.99313	1.00115	1.01274	1.01845	1.02618	1.0335	1.0402	1.05318	1.06837	1.07947	1.09305	1.10459	1.11889	1.118	1.11729	1.11628	1.10748	1.088	1.06105	1.0287	0.99736	0.972598	0.943614	0.92417	0.902574	0.888936	0.879351	0.871826	0.869282	0.865129	0.862685	0.85159	0.849015	0.843315	0.845734	0.842101	0.838181	0.840513	0.84116	0.837908
cngcomp_cm	0.967742	0.967905	0.966802	0.970977	0.970725	0.97262	0.975925	0.984411	0.990197	0.991211	1.00913	1.01788	1.03978	1.05056	1.05973	1.0694	1.07648	1.07023	1.05515	1.03074	1.00412	0.976759	0.953205	0.927285	0.913998	0.898546	0.884859	0.873421	0.860286	0.85516	0.848875	0.837986	0.834583	0.830637	0.827018	0.81724	0.815428	0.81269	0.815611	0.808538	0.804203
cngcomp_cm	0.986549	0.993365	1.00331	1.01096	1.02004	1.02828	1.03778	1.04525	1.05512	1.06614	1.0873	1.09598	1.09186	1.09165	1.08041	1.06379	1.04611	1.02819	1.01076	0.994025	0.96719	0.93974	0.914735	0.895905	0.882822	0.873543	0.866276	0.864338	0.858094	0.851968	0.844697	0.844392	0.839501	0.835074	0.832194	0.825241	0.81818	0.815235	0.813571	0.805088	0.802905
cngcomp_cm	0.998042	1.00491	1.00438	1.0128	1.01834	1.03135	1.0407	1.05388	1.06556	1.07608	1.08942	1.10812	1.1076	1.1071	1.1303	1.14069	1.12995	1.14831	1.15488	1.13137	1.09862	1.07365	1.04702	1.02374	0.997362	0.978428	0.964107	0.950116	0.939263	0.928547	0.920114	0.907802	0.89855	0.889966	0.885878	0.881387	0.873959	0.86666	0.864248	0.859815	0.857088
cngcomp_cm	0.992709	0.9949	0.999893	1.00229	1.00345	1.0154	1.02429	1.02945	1.03776	1.04796	1.06514	1.07722	1.08919	1.10258	1.11462	1.12691	1.13372	1.13577	1.13695	1.13256	1.11779	1.10168	1.07473	1.04263	1.01698	0.984561	0.963191	0.942787	0.929348	0.914	0.902901	0.893316	0.886471	0.874068	0.869919	0.861589	0.856023	0.853612	0.849749	0.848314	0.849678
cngcomp_cm	0.990021	1.00147	1.00032	1.0042	1.01543	1.02517	1.02741	1.03304	1.03754	1.04957	1.05742	1.07717	1.0921	1.10635	1.11287	1.11076	1.10429	1.10266	1.08549	1.071	1.05233	1.02486	1.00624	0.985214	0.96754	0.94992	0.93454	0.927807	0.919564	0.911787	0.906979	0.899075	0.887618	0.887865	0.883658	0.874986	0.870246	0.863133	0.864962	0.85631	0.853838
cngcomp_cm	0.999607	1.00315	1.00388	1.01021	1.01422	1.01868	1.02011	1.03183	1.04642	1.05955	1.06653	1.07643	1.0862	1.10237	1.10954	1.1113	1.10672	1.103	1.08694	1.06518	1.03587	1.01629	1.00445	0.980932	0.965302	0.951588	0.939188	0.922046	0.916673	0.908524	0.907997	0.899827	0.893699	0.890382	0.8842	0.883741	0.878752	0.877386	0.871849	0.873057	0.86814
col_iaa	1.10051	1.10779	1.10967	1.11277	1.12111	1.12651	1.13732	1.13949	1.15112	1.15318	1.15918	1.17227	1.18379	1.18326	1.1679	1.17314	1.17471	1.17789	1.18006	1.17518	1.16557	1.15191	1.1393	1.13121	1.12147	1.11306	1.10516	1.08667	1.07977	1.06838	1.05596	1.04712	1.03448	1.02488	1.01617	0.999645	0.996985	0.993296	0.986792	0.983303	0.975446
col_iaa	1.0369	1.04171	1.04488	1.05072	1.05856	1.0677	1.0794	1.08864	1.0953	1.10467	1.11444	1.11982	1.12732	1.1347	1.13665	1.13861	1.13334	1.12008	1.11859	1.11386	1.09807	1.08153	1.07777	1.06562	1.06063	1.0471	1.03634	1.02673	1.02298	1.01502	1.00782	0.996646	0.991993	0.986448	0.984914	0.979729	0.966894	0.969372	0.964552	0.962593	0.955235
col_iaa	1.01737	1.03098	1.03426	1.03611	1.04003	1.04735	1.05751	1.05943	1.06656	1.07193	1.07701	1.08752	1.10535	1.12028	1.12981	1.13776	1.14781	1.1492	1.13963	1.12637	1.11339	1.10363	1.0884	1.06529	1.05465	1.04215	1.03478	1.02439	1.01502	1.00614	1.00134	0.995043	0.988799	0.981375	0.979489	0.975969	0.971025	0.964774	0.958186	0.953075	0.949505
col_iaa	1.0282	1.03673	1.04233	1.04917	1.05992	1.06968	1.07127	1.04925	1.05785	1.06154	1.06689	1.11188	1.12297	1.13444	1.14816	1.16138	1.17431	1.18026	1.1853	1.18682	1.17888	1.17545	1.16062	1.14126	1.12464	1.10617	1.09931	1.08393	1.06916	1.06629	1.05144	1.04029	1.03157	1.02432	1.01246	1.00812	1.00131	0.992622	0.985695	0.983064	0.980994
col_iaa	1.0438	1.03978	1.0534	1.05652	1.04936	1.03763	1.05006	1.07308	1.07774	1.08953	1.11129	1.1265	1.12832	1.14422	1.1549	1.16265	1.17667	1.18314	1.18697	1.18842	1.18613	1.17273	1.15557	1.14431	1.13327	1.11849	1.10638	1.09978	1.07916	1.06992	1.06103	1.05468	1.04726	1.04147	1.0359	1.02979	1.02086	1.01633	1.01507	1.00781	1.00282
col_iaa	1.03023	1.03404	1.04041	1.04246	1.04314	1.06662	1.08608	1.0939	1.09371	1.08672	1.11419	1.12789	1.14414	1.15626	1.17213	1.19061	1.2019	1.2183	1.23813	1.24469	1.24584	1.23743	1.21399	1.19003	1.1743	1.15224	1.13788	1.1228	1.10984	1.09405	1.08263	1.07208	1.06373	1.05151	1.04685	1.04005	1.03737	1.0304	1.02659	1.02586	1.01907
col_iaa	1.03776	1.04143	1.04448	1.0477	1.04859	1.05229	1.06331	1.05645	1.05729	1.06808	1.07442	1.08679	1.07979	1.07848	1.08146	1.08402	1.08996	1.09138	1.09772	1.1061	1.10411	1.10066	1.10003	1.08772	1.08063	1.07237	1.0714	1.06215	1.06203	1.05789	1.05096	1.04942	1.04213	1.03902	1.03611	1.03356	1.03051	1.0217	1.01456	1.01056	1.00741
col_iaa	1.04413	1.04797	1.04841	1.05698	1.06602	1.07357	1.0778	1.08627	1.09317	1.10446	1.10814	1.11224	1.12347	1.12608	1.13894	1.1483	1.15242	1.16311	1.17726	1.18891	1.19241	1.19035	1.184	1.17589	1.16319	1.15019	1.13844	1.13005	1.11838	1.10871	1.09751	1.0871	1.07984	1.06954	1.05964	1.05727	1.04939	1.04852	1.04545	1.03821	1.03262
col_iaa	1.03359	1.04374	1.04798	1.05098	1.06036	1.05651	1.05658	1.06695	1.0682	1.08801	1.10532	1.12975	1.13726	1.1495	1.15396	1.16172	1.16837	1.16654	1.16327	1.15215	1.14058	1.12896	1.11222	1.09843	1.08774	1.07333	1.06449	1.05651	1.05079	1.04472	1.03956	1.03954	1.03771	1.0305	1.02571	1.02366	1.02012	1.02446	1.02143	1.01446	1.01128
col_iaa	1.03282	1.03767	1.04263	1.04399	1.05019	1.06127	1.06501	1.06828	1.07411	1.08107	1.08231	1.0985	1.1087	1.13074	1.14513	1.15038	1.16174	1.17673	1.18626	1.19062	1.19401	1.19485	1.18932	1.17975	1.16748	1.15079	1.1374	1.11718	1.10089	1.08844	1.07863	1.06854	1.05123	1.04901	1.04534	1.03784	1.03678	1.03433	1.02943	1.02238	1.02027
col_iaa	1.00088	1.00791	1.00802	1.015	1.02733	1.02911	1.04448	1.04595	1.0529	1.05265	1.05241	1.05668	1.06217	1.06569	1.07339	1.07851	1.08249	1.08622	1.08913	1.09135	1.09103	1.08302	1.0739	1.06034	1.04122	1.02092	1.00002	0.991432	0.968818	0.951882	0.93634	0.921257	0.915284	0.905276	0.89379	0.889539	0.891443	0.886141	0.876501	0.878159	0.87134
col_iaa	0.940849	0.938608	0.933719	0.926088	0.913932	0.887129	0.912846	0.919645	0.923071	0.940523	0.950588	0.961196	0.964872	0.972203	0.975391	0.979525	0.980652	0.975403	0.966484	0.949795	0.935412	0.925905	0.905272	0.888136	0.87184	0.858381	0.848699	0.84487	0.839034	0.835713	0.828513	0.823126	0.819961	0.813441	0.812031	0.811995	0.814873	0.810975	0.816339	0.816504	0.812724
col_iaa	0.953839	0.956439	0.961366	0.967831	0.96734	0.977774	0.985126	0.98386	0.968422	0.977369	0.977937	0.984282	1.00502	1.03158	1.03704	1.04607	1.05616	1.05215	1.05255	1.05423	1.04972	1.03445	1.01767	1.00205	0.986127	0.971864	0.961849	0.953672	0.945164	0.939488	0.924874	0.918854	0.91341	0.901339	0.900396	0.892661	0.891943	0.886092	0.881122	0.872909	0.873712
col_iaa	0.974967	0.97159	0.968445	0.978258	0.979674	0.97845	0.999128	1.01086	1.01627	1.02297	1.02488	1.02725	1.03433	1.04128	1.05329	1.06146	1.07085	1.07573	1.08178	1.08009	1.06863	1.05929	1.04582	1.03184	1.02221	1.00715	0.994854	0.983756	0.975539	0.962843	0.957888	0.952023	0.943908	0.941502	0.936827	0.931738	0.922552	0.922336	0.922274	0.918317	0.917632
col_iaa	0.927659	0.928663	0.935573	0.936358	0.94169	0.943447	0.952067	0.960663	0.962999	0.957075	0.964044	0.961055	0.95893	0.975783	1.00972	1.03038	1.04334	1.06244	1.07122	1.07162	1.06886	1.062	1.05338	1.04341	1.02705	1.01428	0.99593	0.986764	0.977717	0.969613	0.961852	0.950722	0.941103	0.924143	0.91507	0.904993	0.900574	0.892404	0.886225	0.88743	0.875139
col_iaa	0.969325	0.971282	0.975632	0.97721	0.985355	0.986663	0.978012	0.970472	0.975079	1.00335	1.01911	1.03256	1.04956	1.06046	1.07262	1.08392	1.09587	1.10402	1.10754	1.10658	1.09784	1.09156	1.07053	1.05647	1.04	1.02633	1.01535	1.00516	0.994147	0.989305	0.978074	0.969922	0.962605	0.961048	0.956797	0.950646	0.949272	0.940835	0.933611	0.93828	0.93549
col_iaa	0.947463	0.956878	0.955268	0.960099	0.95873	0.964357	0.978501	0.985063	0.988793	1.00187	1.01455	1.01463	0.99813	1.00318	0.998211	0.992572	0.986416	0.98079	0.971924	0.965753	0.957583	0.950177	0.945417	0.940009	0.930202	0.921849	0.91229	0.905157	0.90306	0.898214	0.891806	0.883952	0.879936	0.876518	0.873223	0.874936	0.871019	0.867634	0.868985	0.867139	0.863931
col_iaa	0.951033	0.95895	0.967001	0.97057	0.984346	0.987148	0.993202	1.00153	1.00729	1.01618	1.02545	1.03396	1.04922	1.0566	1.06784	1.07651	1.08837	1.09724	1.09315	1.09519	1.08748	1.07241	1.05385	1.03482	1.02092	1.00694	0.990265	0.975975	0.966163	0.957652	0.955745	0.944315	0.9403	0.940558	0.935772	0.925005	0.919471	0.915559	0.91074	0.912515	0.907013
col_iaa	0.92112	0.927888	0.931277	0.931376	0.947243	0.953908	0.965406	0.975267	0.980903	0.988078	0.992423	0.997802	1.00663	1.01731	1.02812	1.04193	1.0568	1.07564	1.0963	1.10442	1.11295	1.11423	1.10288	1.09665	1.08961	1.07667	1.05876	1.04589	1.03104	1.01216	0.992425	0.980605	0.967865	0.959198	0.949701	0.946437	0.94378	0.938378	0.937482	0.940086	0.93743
col_iaa	1.07952	1.08546	1.08759	1.09027	1.09265	1.09526	1.09733	1.10086	1.10104	1.10471	1.10374	1.10611	1.11818	1.1262	1.13906	1.14942	1.15839	1.16385	1.1622	1.16053	1.15441	1.14723	1.1423	1.13008	1.11284	1.09271	1.06675	1.05019	1.02528	1.00417	0.980246	0.977473	0.965527	0.95965	0.948753	0.940384	0.938019	0.931969	0.921698	0.914769	0.904614
col_iaa	1.05963	1.05943	1.06531	1.06737	1.07263	1.07641	1.07512	1.07713	1.08091	1.08274	1.07706	1.08201	1.08725	1.0977	1.10693	1.11603	1.12322	1.13018	1.14333	1.15148	1.15737	1.15564	1.15337	1.14396	1.13474	1.11806	1.1036	1.09479	1.08266	1.06433	1.0542	1.0378	1.02581	1.01272	0.999228	0.98775	0.974074	0.966805	0.953591	0.943924	0.940151
col_iaa	1.05246	1.05857	1.05935	1.07085	1.07146	1.07591	1.08216	1.08335	1.089	1.09307	1.1067	1.12003	1.13982	1.14661	1.1698	1.1698	1.17555	1.16983	1.16652	1.16679	1.15337	1.13308	1.12155	1.10272	1.07512	1.05758	1.03617	1.02198	1.0083	0.995132	0.985949	0.973651	0.965472	0.959682	0.950113	0.946799	0.941544	0.930543	0.927218	0.924452	0.923759
col_iaa	1.03888	1.05158	1.06217	1.06539	1.07284	1.08295	1.09124	1.10325	1.1101	1.11866	1.12405	1.11603	1.12366	1.14112	1.15944	1.16469	1.17051	1.17277	1.16694	1.15769	1.13939	1.11427	1.10038	1.08408	1.06742	1.05239	1.03624	1.02058	1.00466	0.988694	0.980353	0.971717	0.962352	0.950177	0.946342	0.937122	0.927337	0.916804	0.910922	0.903389	0.89756
col_iaa	1.05332	1.06332	1.0711	1.07784	1.08306	1.09058	1.09278	1.10217	1.10195	1.11045	1.12062	1.12403	1.13238	1.14533	1.15404	1.16268	1.17033	1.17479	1.16823	1.15845	1.13614	1.12075	1.1013	1.08369	1.06897	1.05798	1.04055	1.02751	1.01186	1.00069	0.989879	0.982207	0.973237	0.960781	0.95048	0.947719	0.941149	0.939814	0.936403	0.92981	0.920988
col_iaa	1.06534	1.06747	1.07585	1.08076	1.08228	1.08325	1.08691	1.0834	1.07943	1.08065	1.0923	1.10149	1.11967	1.13734	1.15195	1.16618	1.17181	1.1767	1.1664	1.15625	1.14402	1.13025	1.11786	1.09961	1.08554	1.0728	1.05913	1.04664	1.03473	1.02343	1.01063	1.00469	0.997359	0.991586	0.982642	0.974419	0.969852	0.967368	0.95935	0.952133	0.952659
col_iaa	1.06712	1.07938	1.0824	1.08871	1.09394	1.09992	1.10874	1.11594	1.12254	1.12478	1.1343	1.13721	1.15323	1.16688	1.18028	1.18788	1.19126	1.19905	1.19243	1.18687	1.1762	1.15139	1.12861	1.10412	1.08732	1.07311	1.05065	1.03465	1.02556	1.00932	1.00118	0.989847	0.981394	0.972714	0.959988	0.957514	0.94783	0.944842	0.942183	0.9408	0.935781
col_iaa	1.06457	1.0738	1.07882	1.07865	1.08193	1.08145	1.08309	1.08712	1.08629	1.08427	1.08574	1.09114	1.08807	1.0815	1.09824	1.10559	1.11279	1.12502	1.12409	1.13029	1.12769	1.12087	1.10911	1.09857	1.0824	1.06929	1.0491	1.03287	1.01407	1.00102	0.983119	0.970407	0.960766	0.947465	0.938147	0.926177	0.92028	0.917934	0.907325	0.905452	0.900154
col_iaa	1.05178	1.05811	1.06684	1.07353	1.07819	1.08419	1.08632	1.09462	1.0985	1.10037	1.10103	1.11101	1.12368	1.13929	1.15713	1.16836	1.18645	1.19565	1.19966	1.19984	1.19935	1.19171	1.17606	1.15057	1.12957	1.10096	1.08432	1.06188	1.05007	1.03755	1.02746	1.01758	1.00592	0.995745	0.983271	0.978004	0.974002	0.972896	0.96617	0.962216	0.957055
col_iaa	1.0495	1.05324	1.05885	1.05973	1.0654	1.04688	1.05411	1.07276	1.08111	1.09014	1.10027	1.1119	1.12122	1.13223	1.15013	1.16011	1.16593	1.17279	1.17259	1.16636	1.159	1.14188	1.12011	1.10432	1.08235	1.06242	1.04393	1.03361	1.01859	1.00938	1.0003	0.993062	0.982993	0.974041	0.968245	0.963066	0.954215	0.947431	0.945825	0.93586	0.938281
col_iaa	1.04012	1.0502	1.04528	1.04984	1.05302	1.05574	1.05952	1.05912	1.06238	1.07025	1.07548	1.07532	1.07991	1.08514	1.09511	1.10312	1.10324	1.10861	1.1083	1.10296	1.09615	1.09766	1.09039	1.08698	1.07047	1.05688	1.04723	1.03658	1.02828	1.01835	1.01512	1.00728	1.00067	0.991997	0.99197	0.98492	0.975839	0.973897	0.970196	0.965636	0.964599
col_iaa	1.05294	1.06114	1.07258	1.08348	1.09355	1.09329	1.08367	1.08423	1.08787	1.10938	1.14192	1.15229	1.14569	1.13758	1.12561	1.11714	1.10962	1.09005	1.05937	1.05031	1.03492	1.01237	0.998793	0.983293	0.970238	0.953814	0.939152	0.928692	0.920776	0.909095	0.90203	0.899006	0.886811	0.881553	0.879511	0.86794	0.865448	0.865081	0.860242	0.860427	0.860045
col_iaa	1.05685	1.06869	1.07281	1.07855	1.09239	1.10756	1.11412	1.12797	1.13521	1.14388	1.1461	1.15416	1.16065	1.1665	1.17577	1.18032	1.18884	1.19625	1.19745	1.20626	1.18835	1.18595	1.17139	1.1532	1.13692	1.11499	1.10029	1.08047	1.05968	1.04595	1.03479	1.02273	1.00449	0.991928	0.978558	0.965076	0.950238	0.939745	0.927519	0.923573	0.918813
col_iaa	1.01189	1.01685	1.01913	1.0269	1.0346	1.03938	1.04839	1.06124	1.05766	1.05798	1.06855	1.07389	1.09356	1.11194	1.11812	1.12911	1.13986	1.14851	1.1431	1.13052	1.12413	1.10565	1.08868	1.0686	1.05423	1.0436	1.03079	1.01348	1.00331	0.994698	0.985032	0.974741	0.964571	0.957044	0.949644	0.946678	0.935333	0.928969	0.921047	0.910911	0.908543
col_iaa	1.03982	1.04307	1.04274	1.05598	1.06487	1.07311	1.08395	1.08331	1.09257	1.09897	1.11339	1.1254	1.13979	1.15411	1.1682	1.18256	1.19477	1.19415	1.18648	1.18278	1.17562	1.16561	1.13542	1.10719	1.08405	1.05855	1.03549	1.01336	1.00363	0.984914	0.972927	0.961239	0.948115	0.940165	0.932862	0.926559	0.912777	0.913	0.904135	0.897576	0.893341
col_iaa	1.03389	1.03313	1.03556	1.03645	1.03877	1.04218	1.04279	1.04461	1.0433	1.04812	1.0526	1.05996	1.07504	1.09182	1.10234	1.10569	1.11128	1.11216	1.11005	1.10141	1.0926	1.07824	1.07083	1.05376	1.04347	1.03112	1.02072	1.00848	0.996461	0.989936	0.978203	0.972065	0.961869	0.954896	0.947156	0.939205	0.933141	0.923742	0.918442	0.916978	0.912035
col_iaa	1.04778	1.05721	1.06602	1.07228	1.0842	1.08751	1.09821	1.10583	1.11336	1.12016	1.12989	1.13931	1.14722	1.16238	1.16173	1.16314	1.15714	1.14542	1.1331	1.11949	1.09977	1.08418	1.06475	1.04775	1.03292	1.0183	1.00701	0.999171	0.98886	0.972131	0.965224	0.956977	0.945036	0.938316	0.933062	0.929761	0.925609	0.924487	0.927982	0.922493	0.930145
col_iaa	1.03679	1.03887	1.04547	1.04926	1.05795	1.06648	1.06961	1.08006	1.08775	1.08902	1.09705	1.11208	1.1197	1.13252	1.13953	1.14501	1.14702	1.1344	1.11632	1.10058	1.09155	1.07057	1.05376	1.03856	1.02378	1.0156	1.00153	0.99216	0.98396	0.975344	0.965591	0.959279	0.956252	0.954443	0.946954	0.94044	0.94159	0.939868	0.934693	0.931553	0.932831
col_iaa	1.03407	1.03801	1.0431	1.05087	1.05128	1.05954	1.05294	1.05567	1.06606	1.08386	1.0945	1.10203	1.10549	1.11853	1.13067	1.14239	1.15809	1.17286	1.18423	1.19117	1.20017	1.21047	1.20509	1.19859	1.18383	1.16155	1.13526	1.11018	1.09732	1.08616	1.06813	1.04654	1.02731	1.00107	0.988179	0.970239	0.963644	0.951144	0.939455	0.928956	0.920741
col_iaa	1.0652	1.07483	1.07928	1.07946	1.09171	1.09714	1.09641	1.09894	1.09862	1.10728	1.11259	1.11646	1.13196	1.13626	1.14372	1.15143	1.1643	1.17914	1.19141	1.20294	1.20986	1.21571	1.22104	1.21759	1.20817	1.19619	1.17921	1.15694	1.13641	1.11995	1.09879	1.07645	1.05881	1.03635	1.01646	1.00062	0.989037	0.981083	0.9681	0.956359	0.947649
col_iaa	1.06075	1.06874	1.08083	1.08796	1.10358	1.11267	1.12601	1.13323	1.14128	1.14698	1.14712	1.16194	1.17154	1.16727	1.18432	1.19857	1.20869	1.22348	1.2163	1.20419	1.19267	1.1702	1.14575	1.12771	1.11062	1.09295	1.06998	1.05128	1.04207	1.02967	1.01833	1.00577	0.996705	0.980809	0.969987	0.961221	0.944289	0.936028	0.925815	0.927849	0.927254
col_iaa	1.00852	1.01275	1.01221	1.01602	1.02869	1.04125	1.04269	1.04796	1.05289	1.05661	1.06168	1.06636	1.07765	1.0884	1.10226	1.09138	1.07902	1.09027	1.09158	1.116	1.15267	1.14403	1.12715	1.1117	1.08949	1.06556	1.05067	1.04204	1.02438	1.0118	1.00038	0.989887	0.979767	0.965574	0.956648	0.945614	0.940501	0.935616	0.931582	0.928492	0.914804
col_iaa	1.02838	1.03124	1.03845	1.04283	1.04536	1.03408	1.01668	1.03664	1.04518	1.05686	1.06823	1.07241	1.09021	1.0913	1.09695	1.11297	1.12678	1.12791	1.12687	1.12048	1.11468	1.10225	1.08188	1.06121	1.04452	1.03515	1.01733	1.00729	0.995062	0.983943	0.975123	0.969724	0.959336	0.95625	0.951742	0.942264	0.938398	0.929737	0.924101	0.915195	0.917865
col_iaa	1.02345	1.02994	1.03193	1.03811	1.04358	1.04633	1.05352	1.05699	1.06233	1.06518	1.07028	1.074	1.08604	1.0946	1.10269	1.11262	1.12527	1.14008	1.16044	1.17467	1.18315	1.1898	1.18962	1.18257	1.17633	1.15304	1.13306	1.10996	1.08753	1.06943	1.05397	1.04009	1.02703	1.01004	1.00462	0.992377	0.978141	0.97161	0.9628	0.955522	0.949528
col_iaa	1.00878	1.01436	1.02063	1.0209	1.02913	1.03486	1.04112	1.055	1.05815	1.06327	1.0663	1.07196	1.07383	1.08186	1.09364	1.09998	1.11946	1.12891	1.13843	1.14088	1.13679	1.1326	1.12743	1.11631	1.09751	1.08736	1.06968	1.05596	1.04289	1.03182	1.0139	1.00294	0.990074	0.982849	0.974323	0.969313	0.960778	0.960022	0.952272	0.952939	0.947246
col_iaa	1.03926	1.04705	1.05281	1.06393	1.06213	1.07051	1.07345	1.08057	1.08358	1.09402	1.10125	1.10273	1.10946	1.12217	1.13019	1.14159	1.15662	1.17305	1.18172	1.19349	1.19765	1.19432	1.18603	1.17435	1.15508	1.13526	1.11388	1.09657	1.08082	1.06069	1.04526	1.03602	1.03387	1.02166	1.01142	0.999692	0.991927	0.979294	0.969199	0.957055	0.954509
col_iaa	1.00711	1.01684	1.02109	1.02295	1.02829	1.03444	1.03278	1.03497	1.02667	1.02751	1.05719	1.07147	1.08704	1.09938	1.10931	1.11986	1.13086	1.13505	1.14461	1.1465	1.1456	1.14173	1.13116	1.11932	1.10231	1.09532	1.07668	1.06151	1.05133	1.03265	1.02318	1.01686	1.01192	1.00181	0.991435	0.987649	0.981347	0.977439	0.9657	0.963517	0.956529
col_iaa	1.02279	1.03062	1.0259	1.02642	1.03197	1.03779	1.04197	1.04468	1.04554	1.05416	1.05393	1.05899	1.06885	1.0791	1.08565	1.09788	1.11304	1.12224	1.1332	1.14625	1.15838	1.16333	1.16386	1.16504	1.15752	1.14475	1.13412	1.11575	1.10545	1.08667	1.07678	1.06782	1.03848	1.02772	1.02351	1.01132	1.01	1.00304	0.994333	0.989507	0.98197
col_iaa	1.06547	1.07296	1.07875	1.08664	1.08473	1.0951	1.10149	1.1086	1.11701	1.11956	1.12214	1.13542	1.14978	1.15959	1.16983	1.177	1.17932	1.18578	1.17935	1.17181	1.16103	1.15055	1.13612	1.12027	1.10494	1.09084	1.0724	1.06895	1.05396	1.04086	1.03379	1.01867	1.01423	1.01022	1.00331	0.992141	0.982067	0.978248	0.967855	0.972183	0.96713
col_iaa	1.05218	1.04989	1.05869	1.06475	1.07295	1.07626	1.0871	1.08852	1.08754	1.09903	1.12334	1.13505	1.1458	1.16189	1.16867	1.19042	1.18837	1.19102	1.18912	1.17535	1.15718	1.13807	1.12103	1.10183	1.08953	1.06825	1.04837	1.0341	1.02442	1.01892	1.01403	1.00949	1.00555	1.00159	0.997321	0.993824	0.987478	0.987071	0.985773	0.97439	0.975484
cngc_iaa	0.973709	0.973852	0.981148	0.98207	0.981364	0.985612	0.983616	0.984419	0.983415	0.980202	0.983193	0.982203	0.979355	0.980376	0.98272	0.985748	0.979847	0.98149	0.980372	0.980289	0.985165	0.9897	0.98995	1.00471	1.00994	1.00672	0.989539	0.974808	0.961225	0.951684	0.94798	0.944845	0.942155	0.941607	0.938077	0.931338	0.932136	0.931156	0.933919	0.926532	0.924139
cngc_iaa	0.966072	0.965678	0.962507	0.963028	0.956066	0.958387	0.959738	0.957687	0.959647	0.960604	0.95905	0.96539	0.9688	0.978532	0.98426	0.994764	1.00081	1.00069	1.0014	1.00014	1.0006	0.996241	0.9895	0.979459	0.984274	0.979139	0.974648	0.972534	0.960362	0.95136	0.949302	0.943653	0.938734	0.936261	0.930733	0.923877	0.929132	0.921059	0.920174	0.922817	0.922063
cngc_iaa	0.984654	0.983921	0.976152	0.980043	0.971637	0.964703	0.967835	0.979606	0.992212	0.994133	0.996219	0.999439	1.00832	1.00795	1.00818	1.01418	1.01282	1.01461	1.00971	1.00795	1.00732	1.00068	0.995253	0.983868	0.981758	0.977617	0.972351	0.969898	0.968803	0.961809	0.964158	0.964151	0.967933	0.968092	0.96722	0.954813	0.953249	0.952829	0.949696	0.942039	0.940185
cngc_iaa	0.979626	0.983418	0.989749	0.99085	0.993785	0.99542	1.00054	1.00828	1.01105	1.01106	1.02424	1.03301	1.03765	1.04881	1.05769	1.06623	1.07842	1.08032	1.07153	1.07832	1.07588	1.07031	1.06247	1.06625	1.05893	1.04301	1.03114	1.01435	0.998926	0.988915	0.978067	0.963653	0.961618	0.956051	0.949935	0.945306	0.945971	0.936874	0.932006	0.92197	0.916404
cngc_iaa	0.972232	0.971371	0.980689	0.980206	0.981044	0.991918	0.991123	0.983999	0.988617	0.994586	0.999929	1.00701	1.02012	1.02319	1.02722	1.02203	1.02233	1.01955	1.02078	1.02096	1.01605	1.01369	1.00904	1.00367	0.992753	0.977964	0.961852	0.951609	0.944267	0.932839	0.931071	0.927282	0.91997	0.91661	0.912366	0.908066	0.903219	0.899887	0.895376	0.890689	0.887272
cngc_iaa	0.991662	0.994485	0.996089	0.997741	1.00364	1.00528	1.00508	1.0058	1.00633	1.00516	1.00733	1.00906	1.01373	1.02014	1.02245	1.01988	1.02294	1.02045	1.0216	1.02203	1.01865	1.01289	0.994042	0.968303	0.968799	0.939759	0.96805	0.967784	0.961021	0.959014	0.954627	0.952176	0.948448	0.93716	0.9364	0.932663	0.928551	0.930089	0.929871	0.92884	0.926531
cngc_iaa	0.985686	0.989286	0.999692	0.996119	0.994446	0.997333	0.998788	1.00359	1.00428	1.00391	1.00211	1.00898	1.01193	1.01865	1.03063	1.03621	1.04545	1.05524	1.06126	1.06908	1.06475	1.05317	1.03926	1.02603	1.01705	1.00206	0.99377	0.985723	0.97745	0.973584	0.971054	0.958486	0.954817	0.95222	0.948772	0.939787	0.938499	0.931967	0.932134	0.931658	0.926006
cngc_iaa	0.982438	0.98568	0.983061	0.987276	0.99397	0.996543	1.00032	1.00336	1.00495	1.00915	1.00427	1.003	1.01398	1.02472	1.04259	1.05294	1.07029	1.07155	1.08756	1.09626	1.09735	1.09075	1.07887	1.0612	1.03813	1.0197	1.0043	0.992039	0.984714	0.976958	0.968198	0.962439	0.959671	0.949851	0.948291	0.938388	0.938809	0.933362	0.928332	0.927037	0.918561
cngc_iaa	1.00472	1.01137	1.01686	1.0186	1.02435	1.02816	1.03293	1.03739	1.04814	1.05154	1.05524	1.06849	1.0657	1.06356	1.06815	1.06697	1.06648	1.05458	1.03064	1.02646	1.0223	1.01338	1.00368	0.993357	0.986963	0.981573	0.977135	0.969545	0.965778	0.965855	0.959805	0.958944	0.951546	0.950339	0.945601	0.944082	0.94392	0.944567	0.939273	0.933367	0.929425
cngc_iaa	1.00292	1.00295	1.00432	1.007	1.00717	1.01385	1.01085	1.01366	1.01776	1.01806	1.02273	1.02987	1.04348	1.0558	1.06781	1.07473	1.07215	1.06242	1.04821	1.03841	1.02886	1.02067	1.0096	0.999243	0.987026	0.980544	0.970871	0.968215	0.963671	0.956311	0.949753	0.942831	0.942674	0.941164	0.938401	0.931471	0.933438	0.931529	0.931036	0.925162	0.92674
cngc_iaa	0.903579	0.904276	0.911848	0.913749	0.913782	0.915673	0.910215	0.915079	0.913813	0.913297	0.914989	0.914962	0.915936	0.915208	0.923314	0.927206	0.929239	0.938271	0.950105	0.947522	0.942522	0.944813	0.93398	0.927535	0.916835	0.901035	0.892236	0.886352	0.880111	0.878034	0.871719	0.869883	0.869341	0.8625	0.85804	0.849524	0.849811	0.844609	0.841776	0.837773	0.832641
cngc_iaa	0.898174	0.905608	0.908444	0.909555	0.909728	0.910891	0.91683	0.923958	0.922325	0.924432	0.929198	0.936468	0.942518	0.950932	0.934609	0.915529	0.918471	0.916405	0.91595	0.914158	0.911429	0.905016	0.903726	0.893487	0.885191	0.877021	0.867952	0.868421	0.865278	0.857834	0.851331	0.849672	0.84113	0.834702	0.831045	0.824854	0.826188	0.825032	0.823677	0.819935	0.817353
cngc_iaa	0.915295	0.917638	0.913803	0.918001	0.918901	0.925232	0.922718	0.922792	0.925476	0.930069	0.937312	0.940904	0.941429	0.94385	0.930834	0.94605	0.958392	0.959679	0.959176	0.933651	0.901788	0.890946	0.886279	0.877853	0.872936	0.871314	0.867034	0.865262	0.856846	0.855763	0.8521	0.849432	0.852845	0.850654	0.843626	0.842126	0.842332	0.838275	0.840088	0.835384	0.833161
cngc_iaa	0.918187	0.926811	0.934848	0.940115	0.94747	0.948266	0.954016	0.953712	0.958217	0.955393	0.959415	0.956882	0.961809	0.963178	0.952188	0.943104	0.931222	0.926899	0.900751	0.891784	0.878191	0.880331	0.87198	0.859087	0.849016	0.84397	0.832676	0.828023	0.823846	0.820298	0.81083	0.816332	0.812566	0.814199	0.809203	0.813688	0.813926	0.806727	0.814067	0.813831	0.816404
cngc_iaa	0.917792	0.918548	0.898505	0.915273	0.892989	0.899381	0.92256	0.924302	0.927496	0.928098	0.934703	0.940302	0.942912	0.948158	0.950028	0.952121	0.954633	0.947529	0.943727	0.941263	0.928543	0.916858	0.904568	0.892862	0.884306	0.875609	0.869292	0.862444	0.855511	0.849609	0.846014	0.846288	0.84442	0.838665	0.831947	0.833611	0.833196	0.832484	0.8311	0.832338	0.834001
cngc_iaa	0.916186	0.920342	0.91705	0.910542	0.910926	0.912555	0.911986	0.915811	0.922138	0.924839	0.925197	0.924584	0.920766	0.923454	0.918873	0.919105	0.913508	0.904709	0.89804	0.89513	0.884714	0.879587	0.868278	0.860237	0.854415	0.850476	0.850617	0.849525	0.850009	0.84553	0.849641	0.850996	0.848321	0.839895	0.84031	0.842757	0.840486	0.836246	0.840229	0.839333	0.843458
cngc_iaa	0.905461	0.904135	0.908018	0.917258	0.915672	0.914721	0.919819	0.918641	0.919953	0.922247	0.916399	0.918115	0.918915	0.914076	0.909891	0.904056	0.897948	0.888152	0.881733	0.878394	0.874829	0.861231	0.862389	0.855414	0.85238	0.851699	0.844461	0.843593	0.83789
cngc_iaa	0.885371	0.88632	0.893262	0.899335	0.895933	0.894821	0.899958	0.901043	0.904718	0.905677	0.906298	0.905386	0.908474	0.907876	0.904948	0.90113	0.898822	0.895046	0.894335	0.891503	0.886259	0.878402	0.872798	0.869377	0.863983	0.862877	0.856506	0.855679	0.852381	0.849415	0.850457	0.847986	0.843876	0.841103	0.84588	0.843135	0.841786	0.839343	0.836387	0.836022	0.83643
cngc_iaa	1.0263	1.0301	1.02728	1.03449	1.03289	1.03251	1.03573	1.03813	1.04234	1.04465	1.04913	1.05219	1.05126	1.05048	1.04335	1.05394	1.06224	1.07038	1.07588	1.07284	1.07469	1.06254	1.04999	1.02645	1.02292	1.01858	1.00444	1.00079	0.990793	0.988849	0.985299	0.987362	0.974153	0.975603	0.96864	0.966192	0.966198	0.960598	0.95876	0.956316	0.944857
cngc_iaa	1.03666	1.03341	1.03856	1.03604	1.0392	1.03961	1.03897	1.03552	1.03617	1.04192	1.03824	1.03382	1.0338	1.04302	1.04468	1.04791	1.05276	1.05329	1.05773	1.06255	1.06169	1.05856	1.05969	1.05643	1.05521	1.05063	1.04239	1.03235	1.01823	1.01267	1.00108	0.99505	0.992903	0.987361	0.983164	0.98229	0.972049	0.963725	0.960678	0.957537	0.953938
cngc_iaa	1.01535	1.0208	1.0279	1.03287	1.03278	1.0365	1.03528	1.04403	1.04057	1.03984	1.04166	1.039	1.03882	1.03146	1.03294	1.03861	1.03628	1.03792	1.03665	1.04177	1.03616	1.03349	1.0265	1.02543	1.02043	1.0141	1.01371	1.00479	0.999888	0.99268	0.995189	0.987608	0.980989	0.976072	0.972019	0.967025	0.961462	0.961033	0.954	0.955452	0.94876
cngc_iaa	0.989462	0.991445	0.991546	0.98312	0.996612	0.98979	0.987744	0.987143	0.989444	0.986953	0.986504	0.991113	0.993341	0.996168	0.999446	0.996265	0.995868	0.994672	0.987087	0.981285	0.975255	0.973758	0.969136	0.961221	0.95216	0.939488	0.929909	0.921418	0.914323	0.909827	0.904244	0.899406	0.893575	0.889724	0.884746	0.88465	0.881293	0.873702	0.873702	0.878839	0.878129
cngc_iaa	0.992009	0.997409	1.00152	0.995319	0.995226	0.979433	0.991378	1.00468	1.00862	1.01233	1.01778	1.02753	1.03239	1.03795	1.04549	1.04474	1.03718	1.03657	1.02831	1.01553	1.00537	0.998467	0.988735	0.97363	0.964364	0.950338	0.940976	0.938156	0.93064	0.926715	0.925209	0.917452	0.909823	0.902174	0.898195	0.898821	0.89726	0.897547	0.893747	0.898385	0.897586
cngc_iaa	1.03136	1.03125	1.03163	1.0332	1.02957	1.02738	1.02919	1.02597	1.02073	1.01996	1.02767	1.02559	1.02887	1.02829	1.02896	1.0299	1.03338	1.03442	1.03733	1.03584	1.03034	1.01772	1.00159	0.999551	0.99039	0.981875	0.970725	0.964347	0.957874	0.954139	0.952983	0.949285	0.941749	0.933991	0.932193	0.929113	0.928297	0.920222	0.912129	0.907155	0.901962
cngc_iaa	1.02144	1.01745	1.02198	1.02771	1.0223	1.02384	1.0264	1.02633	1.01663	1.02486	1.0276	1.03194	1.03058	1.03764	1.03382	1.0375	1.04031	1.04184	1.04001	1.03635	1.03345	1.02661	1.01606	1.00753	0.996157	0.984852	0.975798	0.969111	0.960955	0.956141	0.951388	0.944004	0.936964	0.93065	0.921509	0.922585	0.920614	0.909783	0.902048	0.896216	0.895562
cngc_iaa	1.05874	1.06007	1.07257	1.07527	1.06936	1.07618	1.07019	1.06397	1.06086	1.05519	1.05887	1.06242	1.06608	1.06387	1.05953	1.06635	1.06599	1.06936	1.07557	1.08052	1.08718	1.08769	1.09251	1.08466	1.07987	1.07003	1.05758	1.04165	1.02882	1.0158	1.00915	0.996968	0.984014	0.975624	0.964459	0.955597	0.950657	0.941969	0.941655	0.937517	0.932321
cngc_iaa	1.01549	1.01233	1.0127	1.01201	1.0085	1.00626	1.00665	0.99919	0.997946	1.00076	0.997508	0.999025	0.9998	1.00027	1.0049	1.00223	1.00332	0.996346	0.990359	0.981804	0.975837	0.964644	0.943367	0.936851	0.93198	0.92622	0.917492	0.91512	0.907715	0.909073	0.901585	0.903975	0.901108	0.90507	0.900071	0.897457	0.895447	0.896638	0.8961	0.900666	0.897868
cngc_iaa	1.02568	1.03634	1.0353	1.04478	1.05043	1.05712	1.06548	1.07391	1.07716	1.08696	1.09035	1.10036	1.10767	1.10997	1.11737	1.1179	1.11619	1.11472	1.10924	1.10183	1.08652	1.07037	1.05121	1.03884	1.03202	1.02229	1.01657	1.01337	1.00771	0.996577	0.992148	0.99318	0.985377	0.980844	0.976522	0.96718	0.961114	0.960961	0.95299	0.952512	0.949545
cngc_iaa	1.02325	1.01775	1.02224	1.02948	1.03388	1.03296	1.03671	1.0352	1.04224	1.03999	1.04303	1.04214	1.03074	1.03331	1.02809	1.03493	1.02821	1.03708	1.04533	1.04015	1.02896	1.01727	1.00588	0.997718	0.990903	0.977998	0.980573	0.978987	0.969756	0.965437	0.959605	0.94968	0.948203	0.93724	0.936386	0.929731	0.925821	0.922732	0.912796	0.908973	0.90781
cngc_iaa	1.01991	1.02821	1.02676	1.03425	1.03523	1.04339	1.05064	1.04983	1.06398	1.07118	1.08374	1.08488	1.09066	1.09737	1.09507	1.09633	1.10431	1.09334	1.09433	1.08867	1.07474	1.05398	1.03828	1.02612	1.01459	1.00681	0.999772	0.99007	0.986033	0.977285	0.967557	0.960581	0.952758	0.946831	0.935964	0.927748	0.922741	0.917767	0.910712	0.908049	0.899287
cngc_iaa	1.03951	1.04786	1.05143	1.05642	1.06307	1.06992	1.07993	1.08222	1.08837	1.08655	1.09041	1.10629	1.10987	1.1141	1.11761	1.11845	1.11776	1.12048	1.12385	1.11907	1.11444	1.10602	1.09774	1.08453	1.06394	1.04944	1.04098	1.03688	1.03012	1.02413	1.01628	1.01423	1.00678	1.00604	0.997485	0.989625	0.98334	0.982321	0.975214	0.970909	0.967575
cngc_iaa	0.987388	0.98633	0.988761	0.992438	0.993821	0.994188	0.992892	0.994784	0.989408	0.988801	0.99116	0.9875	0.985236	0.980818	0.974425	0.963586	0.959959	0.970279	0.965366	0.959985	0.953458	0.948345	0.952049	0.939589	0.929255	0.92223	0.90206	0.897795	0.894314	0.882032	0.872166	0.867055	0.860318	0.851533	0.838734	0.8371	0.831084	0.827113	0.828665	0.835231	0.834917
cngc_iaa	0.992215	0.989583	0.991129	0.997077	0.99845	1.00133	0.99993	0.999356	0.994256	0.995682	0.994133	0.994188	0.991976	0.990119	0.981994	0.979267	0.970234	0.962505	0.955054	0.948696	0.944833	0.933243	0.92053	0.912033	0.905652	0.891974	0.883818	0.88221	0.877373	0.875141	0.874044	0.871467	0.84898	0.835085	0.830786	0.826353	0.824088	0.821303	0.817964	0.814304	0.817794
cngc_iaa	1.02176	1.02526	1.02849	1.02491	1.02954	1.02449	1.0288	1.03203	1.03137	1.03336	1.03899	1.04551	1.04192	1.05052	1.06249	1.06294	1.06494	1.0582	1.05571	1.0462	1.03488	1.02006	1.00757	0.99323	0.985034	0.979875	0.976521	0.963985	0.959764	0.943184	0.945838	0.94767	0.932968	0.92424	0.919992	0.907626	0.903854	0.893545	0.887309	0.884619	0.881891
cngc_iaa	1.01546	1.02043	1.02232	1.02598	1.03018	1.03258	1.03646	1.03638	1.03915	1.04142	1.02546	1.02849	1.04678	1.05221	1.06061	1.06711	1.07512	1.07742	1.0797	1.0771	1.07032	1.05645	1.05015	1.03901	1.0313	1.02317	1.01536	1.00473	0.997651	0.990636	0.987225	0.977021	0.973953	0.973384	0.96639	0.956141	0.952545	0.945592	0.943485	0.934413	0.931858
cngc_iaa	1.00613	1.0143	1.016	1.01646	1.02564	1.02849	1.02906	1.02913	1.0351	1.04356	1.04596	1.04895	1.05315	1.05373	1.05387	1.05958	1.06261	1.06475	1.06478	1.06499	1.07047	1.07056	1.07173	1.06628	1.05527	1.03677	1.03117	1.02041	1.00898	1.00171	0.99227	0.986196	0.9834	0.977901	0.973624	0.967382	0.949942	0.950864	0.948422	0.942687	0.93764
cngc_iaa	1.0129	1.01266	1.0134	1.02295	1.01379	0.990901	1.00376	1.01192	1.01573	1.02473	1.02927	1.02495	1.02785	1.02659	1.03035	1.03188	1.02668	1.02037	1.01258	1.00902	0.995024	0.98494	0.975672	0.97371	0.965763	0.956139	0.947144	0.93941	0.936867	0.931259	0.925028	0.92141	0.92026	0.915405	0.911881	0.91244	0.907921	0.904385	0.898078	0.8898	0.885211
cngc_iaa	1.0023	1.012	1.01445	1.0203	1.01979	1.01748	1.01574	1.01229	1.00826	1.00207	0.995335	0.996904	0.99161	0.991637	0.978774	0.981669	0.983071	0.991132	0.988705	0.993844	0.995283	0.993366	0.990906	0.988609	0.988545	0.981943	0.978925	0.970983	0.965232	0.957683	0.953937	0.952522	0.94703	0.941988	0.939128	0.928446	0.922598	0.919011	0.91061	0.909298	0.905166
cngc_iaa	1.00424	1.00533	1.00853	1.00771	1.00436	1.00272	1.00306	1.00386	1.0023	0.992204	0.999226	1.00606	1.0042	1.0158	1.02405	1.025	1.03063	1.03238	1.03388	1.03836	1.04516	1.04282	1.04062	1.02657	1.0146	1.00682	0.996624	0.990719	0.980623	0.971643	0.971055	0.960099	0.95581	0.951588	0.94679	0.93766	0.935639	0.93285	0.922309	0.923761	0.914315
cngc_iaa	1.0255	1.03189	1.03617	1.0417	1.04179	1.04182	1.0418	1.03954	1.03911	1.04459	1.04065	1.04263	1.04902	1.05681	1.05649	1.06086	1.06522	1.05982	1.0577	1.05606	1.05685	1.05097	1.05534	1.05246	1.0537	1.04622	1.03647	1.02876	1.01585	1.00279	1.00128	0.99539	0.992486	0.985064	0.983462	0.974928	0.969765	0.965058	0.963488	0.958237	0.958321
cngc_iaa	1.07346	1.07764	1.08652	1.08771	1.08927	1.08945	1.09114	1.09108	1.08826	1.08854	1.08538	1.08388	1.08426	1.08624	1.07909	1.08113	1.08477	1.08167	1.08307	1.0853	1.08835	1.09125	1.09608	1.10293	1.11519	1.12581	1.12575	1.11468	1.09147	1.07459	1.06047	1.0522	1.04491	1.0317	1.02167	1.00871	1.00326	1.00171	0.995701	0.991824	0.994888
cngc_iaa	1.04482	1.05207	1.05526	1.05661	1.0553	1.06078	1.0676	1.0674	1.06457	1.05827	1.0623	1.05979	1.06444	1.06319	1.06364	1.06858	1.06781	1.06826	1.0703	1.06581	1.0682	1.06185	1.0623	1.0576	1.0537	1.04777	1.04597	1.03797	1.03483	1.02582	1.02272	1.01747	1.00771	1.00076	0.996213	0.993778	0.983651	0.975643	0.972118	0.968083	0.955589
cngc_iaa	0.994465	1.00036	1.00183	1.00195	1.002	1.00228	1.00417	1.00307	1.00501	1.00367	1.00295	1.00239	1.00185	1.00494	1.00881	1.01262	1.01034	1.01625	1.01608	1.01986	1.01959	1.01827	1.01772	1.01788	1.01102	1.00188	0.99363	0.992885	0.991497	0.987533	0.980169	0.977308	0.973605	0.965297	0.961478	0.954643	0.952411	0.950073	0.943262	0.940664	0.934851
cngcomp_iaa	1.00743	1.0124	1.01914	1.02557	1.03425	1.04861	1.06625	1.0756	1.09328	1.11145	1.13761	1.15188	1.18056	1.17939	1.16999	1.15856	1.19684	1.19457	1.18361	1.16781	1.14523	1.1307	1.11066	1.0922	1.07159	1.05805	1.04308	1.03146	1.01673	1.01062	1.00477	0.99656	0.990627	0.985611	0.981563	0.973666	0.969991	0.967842	0.96833	0.961191	0.956336
cngcomp_iaa	1.02074	1.02547	1.03234	1.04308	1.04818	1.0581	1.06904	1.08117	1.09752	1.1248	1.14064	1.17101	1.19138	1.21671	1.23144	1.24337	1.26519	1.26191	1.2567	1.24495	1.22844	1.20253	1.18521	1.16076	1.13753	1.11902	1.10068	1.08318	1.07237	1.05685	1.05284	1.04464	1.03303	1.02276	1.03442	1.03317	1.02703	1.02275	1.01925	1.01728	1.0102
cngcomp_iaa	1.03391	1.04133	1.04673	1.05154	1.05489	1.06438	1.08916	1.11746	1.13019	1.1499	1.16443	1.18471	1.19681	1.20666	1.20977	1.19722	1.18417	1.16672	1.14289	1.11745	1.09827	1.08189	1.0632	1.05241	1.04218	1.03941	1.03296	1.02557	1.01732	1.01156	1.00882	1.00063	0.995517	0.987421	0.986901	0.984687	0.981392	0.977054	0.971427	0.970835	0.964195
cngcomp_iaa	1.02537	1.03372	1.03542	1.04438	1.05081	1.06005	1.07428	1.08663	1.09844	1.11234	1.12814	1.14463	1.16027	1.17866	1.19441	1.20693	1.2122	1.22176	1.22322	1.21927	1.21076	1.19725	1.17706	1.15332	1.13889	1.11522	1.09027	1.0683	1.05667	1.04157	1.03637	1.02986	1.02389	1.01464	1.00479	0.990001	0.977395	0.981276	0.980023	0.977437	0.966843
cngcomp_iaa	1.03217	1.04351	1.0498	1.05776	1.06628	1.08083	1.09702	1.10667	1.11979	1.13166	1.15042	1.16875	1.18923	1.19552	1.17756	1.17629	1.18707	1.22489	1.26945	1.26382	1.25352	1.23936	1.21788	1.18884	1.16884	1.15578	1.13906	1.11887	1.10669	1.09222	1.07946	1.07606	1.05984	1.05653	1.05157	1.04258	1.03799	1.02028	1.00971	1.00673	1.00771
cngcomp_iaa	1.03754	1.04083	1.04391	1.05377	1.06953	1.08894	1.09524	1.10699	1.12275	1.12417	1.1448	1.16543	1.19163	1.21595	1.22208	1.22164	1.20795	1.20897	1.2023	1.17593	1.16102	1.13992	1.1297	1.1064	1.09403	1.08041	1.06762	1.06344	1.04966	1.04846	1.03887	1.03209	1.0235	1.01981	1.01602	1.00825	1.00348	0.998176	0.998662	0.993948	0.987223
cngcomp_iaa	1.04443	1.05094	1.0582	1.06676	1.07831	1.09029	1.09791	1.09372	1.0962	1.11112	1.13263	1.15953	1.18772	1.20431	1.21632	1.21654	1.21629	1.20775	1.19939	1.18193	1.16483	1.13863	1.12421	1.10953	1.08834	1.07967	1.06756	1.05305	1.04563	1.03837	1.02581	1.02234	1.01686	1.01521	1.01014	1.00484	0.99861	0.988316	0.988521	0.984539	0.980519
cngcomp_iaa	1.01133	1.01849	1.02426	1.03195	1.04385	1.04566	1.05872	1.07406	1.09078	1.10311	1.11691	1.13224	1.14906	1.16141	1.17146	1.18868	1.22305	1.22907	1.22766	1.23169	1.22365	1.21046	1.19084	1.17349	1.15299	1.13415	1.11563	1.09635	1.08032	1.06384	1.0501	1.04638	1.04154	1.03218	1.01831	1.01636	1.00911	1.00661	0.998632	0.992742	0.989918
cngcomp_iaa	1.04652	1.05323	1.05691	1.05984	1.06651	1.08008	1.09601	1.11552	1.13554	1.15414	1.17682	1.18966	1.20481	1.2141	1.2211	1.22738	1.22636	1.21456	1.20713	1.19303	1.16662	1.14537	1.1281	1.10844	1.09099	1.07307	1.06292	1.04668	1.03754	1.03025	1.01951	1.01603	1.01039	1.00582	0.998621	0.998854	0.991041	0.987944	0.982458	0.979485	0.979237
cngcomp_iaa	0.9465	0.95626	0.968493	0.978552	0.994714	1.00513	1.02107	1.03396	1.04422	1.05502	1.07075	1.08507	1.09335	1.10994	1.10992	1.10897	1.10405	1.09535	1.07632	1.04904	1.02768	1.01733	1.00275	0.987505	0.971336	0.968423	0.956912	0.944611	0.934903	0.93204	0.930606	0.922965	0.919606	0.914684	0.900614	0.903357	0.898089	0.88728	0.885547	0.880889	0.878727
cngcomp_iaa	0.939862	0.942129	0.95313	0.973338	0.978928	0.996161	1.00704	1.02543	1.04016	1.05376	1.06765	1.07764	1.08898	1.09575	1.09049	1.09337	1.08784	1.06885	1.0489	1.02661	1.00011	0.979465	0.959487	0.951082	0.940305	0.933263	0.928958	0.923506	0.915141	0.911468	0.902893	0.896261	0.89068	0.885509	0.884183	0.879511	0.875623	0.870974	0.867111	0.86513	0.860861
cngcomp_iaa	0.957077	0.963758	0.962076	0.976918	0.986609	1.00118	1.01205	1.01011	1.02161	1.04501	1.06764	1.07859	1.09458	1.10768	1.12202	1.13438	1.13704	1.13399	1.13463	1.12701	1.10842	1.08629	1.06449	1.043	1.01586	0.993486	0.982549	0.964973	0.951631	0.941666	0.935477	0.926649	0.923646	0.91889	0.917041	0.913459	0.905063	0.905956	0.898444	0.891027	0.887764
cngcomp_iaa	0.891821	0.894394	0.895414	0.90343	0.911511	0.918862	0.925922	0.934157	0.943456	0.957375	0.974158	0.992445	1.00645	1.02107	1.03758	1.05416	1.07228	1.07843	1.08711	1.09151	1.08649	1.08034	1.06752	1.03475	1.01211	0.993727	0.973112	0.95146	0.939195	0.924206	0.908283	0.893783	0.887302	0.875849	0.871536	0.862892	0.856774	0.853671	0.85302	0.849084	0.846034
cngcomp_iaa	0.957801	0.963603	0.963063	0.975218	0.983351	0.993518	1.00447	1.01998	1.02379	1.02802	1.05061	1.06267	1.07993	1.10241	1.11399	1.11714	1.1067	1.09407	1.07606	1.05505	1.03369	1.0097	0.988711	0.972073	0.954026	0.946975	0.936573	0.927868	0.92125	0.916015	0.907544	0.902283	0.894424	0.88972	0.884308	0.877611	0.872635	0.867101	0.86045	0.857496	0.852429
cngcomp_iaa	0.948293	0.944438	0.94062	0.958658	0.961598	0.965431	0.977242	0.986636	0.998995	1.03136	1.04332	1.05993	1.07392	1.08982	1.10037	1.11048	1.10999	1.10848	1.10307	1.08606	1.06513	1.04055	1.01293	0.993173	0.984449	0.968209	0.961435	0.948311	0.933212	0.924803	0.918174	0.909211	0.903009	0.899613	0.891933	0.88301	0.883504	0.876176	0.873055	0.867126	0.864452
cngcomp_iaa	0.967559	0.976549	0.98752	1.00271	1.01672	1.03401	1.04315	1.05868	1.07709	1.09271	1.10965	1.1124	1.11398	1.10723	1.08931	1.07229	1.05146	1.03046	1.00497	0.980867	0.961903	0.943207	0.932705	0.923477	0.911791	0.903472	0.899721	0.894854	0.888274	0.878857	0.878601	0.870879	0.86356	0.859431	0.854199	0.855102	0.850534	0.847427	0.8425	0.839086	0.833113
cngcomp_iaa	1.11279	1.12262	1.1352	1.14539	1.15643	1.17232	1.19004	1.21174	1.2288	1.24335	1.26623	1.2909	1.30036	1.31555	1.32754	1.33194	1.34102	1.32328	1.29618	1.25612	1.19699	1.16685	1.14041	1.13657	1.11694	1.09726	1.08352	1.06778	1.06116	1.05471	1.04519	1.03994	1.02809	1.02157	1.01345	1.00968	1.00383	1.00412	1.00019	0.994465	0.995639
cngcomp_iaa	1.10869	1.1196	1.12202	1.12724	1.1411	1.14717	1.16595	1.18115	1.19138	1.2045	1.22702	1.2374	1.26475	1.27623	1.28957	1.30085	1.30726	1.31296	1.31265	1.30985	1.28675	1.26451	1.236	1.20342	1.17717	1.15042	1.12742	1.11058	1.09719	1.08267	1.07107	1.06281	1.04842	1.03885	1.03394	1.02976	1.02397	1.02194	1.01189	1.00392	0.995384
cngcomp_iaa	1.16576	1.1718	1.17217	1.18122	1.19097	1.20408	1.21037	1.17398	1.18386	1.20148	1.24321	1.27546	1.29761	1.32363	1.33583	1.34557	1.34429	1.32515	1.3011	1.27931	1.24538	1.21778	1.19274	1.16658	1.15476	1.13839	1.1215	1.10208	1.09372	1.08572	1.07532	1.0677	1.05896	1.05663	1.04509	1.03649	1.03413	1.02342	1.02315	1.01699	1.01048
cngcomp_iaa	1.11103	1.14086	1.16511	1.19299	1.23004	1.25833	1.2574	1.24138	1.21815	1.21065	1.20837	1.20475	1.19375	1.14766	1.12638	1.10599	1.07543	1.0509	1.0337	1.01952	1.00986	1.0008	0.992195	0.984978	0.980231	0.974182	0.966703	0.966917	0.961498	0.960425	0.956915	0.951174	0.95028	0.947602	0.941573	0.938392	0.936903	0.926807	0.920724	0.920735	0.916783
cngcomp_iaa	1.27689	1.2799	1.27396	1.27533	1.27619	1.27425	1.27438	1.29071	1.3045	1.31144	1.32663	1.33945	1.34981	1.36276	1.36982	1.37672	1.37672	1.38045	1.37842	1.3722	1.35757	1.3475	1.32575	1.30606	1.28721	1.25984	1.23885	1.22227	1.2055	1.19356	1.1818	1.1646	1.14339	1.14289	1.13243	1.12755	1.12348	1.12011	1.11495	1.11095	1.10789
cngcomp_iaa	1.05194	1.05322	1.06259	1.07043	1.07803	1.08375	1.08963	1.09803	1.12483	1.16051	1.18403	1.20335	1.21992	1.22979	1.23737	1.23353	1.22058	1.20072	1.17398	1.14692	1.11426	1.08685	1.06315	1.04189	1.02374	1.01225	1.00061	0.990687	0.98004	0.971293	0.965839	0.952655	0.948985	0.946754	0.936864	0.933076	0.92488	0.919718	0.915162	0.915254	0.911952
cngcomp_iaa	1.10519	1.10244	1.11529	1.12088	1.12658	1.13219	1.13169	1.12772	1.12975	1.14076	1.15323	1.17444	1.17216	1.16586	1.14884	1.13174	1.10879	1.08719	1.06105	1.04046	1.01798	1.00618	0.991748	0.980416	0.969597	0.960643	0.954071	0.950391	0.95198	0.95017	0.947685	0.948428	0.95214	0.947152	0.94259	0.938844	0.930991	0.933935	0.93162	0.929806	0.928723
cngcomp_iaa	1.0803	1.08644	1.10103	1.10775	1.1228	1.13975	1.15462	1.17158	1.18798	1.20175	1.20821	1.21559	1.2071	1.18364	1.15744	1.12253	1.09843	1.06653	1.04374	1.01591	1.00415	0.994962	0.991777	0.989075	0.981834	0.980995	0.973685	0.970364	0.96451	0.964104	0.959269	0.957315	0.95835	0.960041	0.962016	0.955462	0.952739	0.940415	0.95009	0.946905	0.942805
cngcomp_iaa	1.11343	1.11804	1.12548	1.12928	1.14434	1.16129	1.17456	1.1927	1.20953	1.21924	1.21433	1.21369	1.20468	1.18384	1.15819	1.12642	1.09617	1.07266	1.04918	1.02847	1.01072	1.00257	0.986193	0.975783	0.964078	0.957668	0.954412	0.941931	0.942744	0.941825	0.942287	0.940159	0.940207	0.943168	0.939783	0.940649	0.931979	0.92941	0.934121	0.92565	0.924578
cngcomp_iaa	1.01848	1.02633	1.02418	1.03212	1.03521	1.03967	1.04919	1.0589	1.06879	1.08624	1.10173	1.11151	1.12232	1.13156	1.14959	1.16692	1.17418	1.1852	1.19072	1.19369	1.19249	1.19093	1.17683	1.16589	1.14858	1.12992	1.109	1.08735	1.07158	1.05694	1.03893	1.02807	1.01549	1.00531	0.994432	0.98986	0.982565	0.975909	0.966196	0.961546	0.95787
cngcomp_iaa	1.03283	1.03417	1.03944	1.04579	1.05356	1.06826	1.08181	1.09198	1.10743	1.11656	1.13455	1.15548	1.16925	1.18713	1.19915	1.20969	1.19715	1.17175	1.15579	1.15956	1.17015	1.17731	1.15893	1.12899	1.10853	1.08979	1.06667	1.04879	1.03134	1.0152	1.00399	0.995554	0.989568	0.982994	0.977164	0.975142	0.973713	0.973741	0.968706	0.958477	0.954843
cngcomp_iaa	1.02864	1.03939	1.03371	1.03286	1.04517	1.05675	1.06928	1.08296	1.09749	1.104	1.11527	1.13061	1.14901	1.16805	1.1855	1.20008	1.20853	1.20514	1.21779	1.22282	1.22595	1.22149	1.20823	1.19761	1.17999	1.15709	1.14025	1.11515	1.0977	1.08133	1.06305	1.05025	1.03548	1.02977	1.01951	1.01475	1.00428	0.997591	0.987084	0.982926	0.971427
cngcomp_iaa	1.03876	1.04379	1.05091	1.06388	1.07218	1.08701	1.10171	1.11886	1.13459	1.1423	1.16932	1.18143	1.19399	1.20132	1.20568	1.19883	1.19572	1.18579	1.16669	1.15265	1.12834	1.10841	1.09356	1.07824	1.05872	1.0451	1.03775	1.02608	1.01969	1.01133	1.00354	0.994656	0.989778	0.982936	0.97471	0.969032	0.953059	0.952736	0.94692	0.942851	0.935938
cngcomp_iaa	1.04373	1.0499	1.05701	1.06517	1.07535	1.08534	1.08648	1.1199	1.13485	1.1535	1.16608	1.1669	1.18405	1.19992	1.20179	1.19854	1.19165	1.17743	1.17134	1.14636	1.12043	1.0982	1.08155	1.06486	1.05541	1.03705	1.02512	1.01812	1.00395	0.992808	0.988108	0.984901	0.979701	0.967361	0.96013	0.953001	0.947462	0.943236	0.940841	0.937462	0.932144
cngcomp_iaa	1.03231	1.03297	1.04186	1.04394	1.05446	1.06104	1.07068	1.08687	1.09559	1.11021	1.13116	1.13354	1.15347	1.17729	1.18739	1.20348	1.21336	1.22057	1.23039	1.22486	1.2153	1.2063	1.18939	1.16698	1.14138	1.11647	1.09021	1.06818	1.05025	1.04007	1.02664	1.02108	1.00949	1.00193	0.990764	0.990369	0.985741	0.979802	0.978231	0.973	0.965737
cngcomp_iaa	1.0661	1.07771	1.08181	1.08796	1.09355	1.10087	1.10509	1.11243	1.12525	1.15139	1.17286	1.1837	1.19814	1.19808	1.20441	1.19706	1.19115	1.17911	1.16389	1.14019	1.12064	1.10122	1.07576	1.06065	1.03962	1.02284	1.00862	0.997844	0.988322	0.97605	0.97491	0.966282	0.955648	0.953967	0.949051	0.947633	0.939044	0.931197	0.9347	0.92306	0.923809
cngcomp_iaa	1.03964	1.04732	1.05331	1.05659	1.06296	1.07062	1.08547	1.09308	1.09808	1.10085	1.11086	1.11843	1.14833	1.1537	1.1639	1.16593	1.16398	1.15322	1.14077	1.11516	1.09617	1.08689	1.07078	1.05942	1.04718	1.03613	1.02363	1.01065	1.01074	1.00307	0.999534	0.989712	0.988617	0.980218	0.979434	0.972614	0.964841	0.958571	0.96189	0.958931	0.954642
cngcomp_iaa	1.05937	1.06825	1.06799	1.07701	1.08728	1.09587	1.10596	1.1108	1.13227	1.14393	1.15146	1.16197	1.17503	1.18048	1.1829	1.17615	1.16145	1.14137	1.1239	1.10324	1.08404	1.06172	1.04215	1.02602	1.00986	0.993508	0.988324	0.979683	0.977869	0.970468	0.966975	0.956807	0.947763	0.940941	0.938675	0.928477	0.929449	0.921473	0.921415	0.92392	0.917325

## Sheet: S4-2f
Genotype	Treatment	Elongation (µm/min)
Col0	cm	2.8326
Col0	cm	2.8834
Col0	cm	2.72123
Col0	cm	2.86843
Col0	cm	3.1328
Col0	cm	3.4498
Col0	cm	3.78003
Col0	IAA 10nM	1.8392
Col0	IAA 10nM	1.73847
Col0	IAA 10nM	1.1218
Col0	IAA 10nM	1.04997
Col0	IAA 10nM	1.90667
Col0	IAA 10nM	1.98543
Col0	IAA 10nM	1.20943
AFB1c	cm	2.96977
AFB1c	cm	2.3943
AFB1c	cm	2.47383
AFB1c	cm	2.4377
AFB1c	cm	1.62827
AFB1c	cm	2.6041
AFB1c	IAA 10nM	2.0651
AFB1c	IAA 10nM	1.48307
AFB1c	IAA 10nM	1.4106
AFB1c	IAA 10nM	1.57963
AFB1c	IAA 10nM	1.91933
AFB1c	IAA 10nM	1.76153
afb1_3	cm	2.7556
afb1_3	cm	3.19483
afb1_3	cm	3.3805
afb1_3	cm	3.88113
afb1_3	cm	3.01737
afb1_3	cm	3.80557
afb1_s	cm	2.6764
afb1_s	cm	2.20123
afb1_s	cm	2.52547
afb1_s	cm	2.7644
afb1_s	cm	2.8212
afb1_s	cm	2.93333
afb1_3	IAA 10nM	1.46117
afb1_3	IAA 10nM	2.36947
afb1_3	IAA 10nM	2.01367
afb1_3	IAA 10nM	1.93743
afb1_3	IAA 10nM	2.07417
afb1_s	IAA 10nM	1.98137
afb1_s	IAA 10nM	1.8552
afb1_s	IAA 10nM	2.01367
afb1_s	IAA 10nM	1.54697
afb1_s	IAA 10nM	1.7661
afb1_s	IAA 10nM	2.27687
afb1_s	IAA 10nM	1.60833
Col0	cm	3.45913
Col0	cm	4.51163
Col0	cm	3.0625
Col0	cm	3.0625
Col0	cm	2.78667
Col0	cm	2.83357
Col0	cm	3.9423
Col0	cm	3.22667
Col0	cm	3.45913
Col0	cm	4.4991
Col0	IAA 10nM	2.3853
Col0	IAA 10nM	3.2771
Col0	IAA 10nM	2.66937
Col0	IAA 10nM	3.3
Col0	IAA 10nM	2.50623
Col0	IAA 10nM	3.4019
Col0	IAA 10nM	3.1225
Col0	IAA 10nM	2.91957
Col0	IAA 10nM	2.42
AFB1c	cm	2.2049
AFB1c	cm	3.23997
AFB1c	cm	2.94797
AFB1c	cm	3.5474
AFB1c	cm	2.76147
AFB1c	cm	2.71433
AFB1c	cm	2.64917
AFB1c	IAA 10nM	1.68827
AFB1c	IAA 10nM	1.8112
AFB1c	IAA 10nM	1.9416
AFB1c	IAA 10nM	1.78427
AFB1c	IAA 10nM	1.85667
AFB1c	IAA 10nM	2.30153
afb1_3	cm	4.84887
afb1_3	cm	4.82553
afb1_3	cm	4.52177
afb1_3	cm	3.89773
afb1_3	cm	4.39327
afb1_3	cm	4.4607
afb1_3	cm	4.4061
afb1_3	cm	4.31173
afb1_3	cm	3.84843
afb1_3	cm	3.78003
afb1_3	IAA 10nM	1.8348
afb1_3	IAA 10nM	3.34773
afb1_3	IAA 10nM	2.86377
afb1_3	IAA 10nM	3.41533
afb1_3	IAA 10nM	3.5261
afb1_3	IAA 10nM	2.6764
afb1_3	IAA 10nM	3.22667
afb1_3	IAA 10nM	3.05193
afb1_3	IAA 10nM	4.01193
afb1_s	cm	3.68277
afb1_s	cm	3.24743
afb1_s	cm	3.95523
afb1_s	cm	3.32273
afb1_s	cm	3.4027
afb1_s	cm	3.6652
afb1_s	cm	4.30423
afb1_s	IAA 10nM	2.74877
afb1_s	IAA 10nM	3.08087
afb1_s	IAA 10nM	3.45367
afb1_s	IAA 10nM	3.313
afb1_s	IAA 10nM	3.08087
afb1_s	IAA 10nM	3.06423
afb1_s	IAA 10nM	2.6175
afb1_s	IAA 10nM	2.1779
afb1_s	IAA 10nM	2.54247
afb1_s	IAA 10nM	2.86093
Col0	cm	3.1729
Col0	cm	3.11127
Col0	cm	4.00187
Col0	cm	2.09993
Col0	cm	2.61133
Col0	cm	3.49623
Col0	cm	2.9223
Col0	cm	3.00757
Col0	IAA 10nM	1.6233
Col0	IAA 10nM	2.34323
Col0	IAA 10nM	1.29947
Col0	IAA 10nM	1.7737
Col0	IAA 10nM	1.83333
Col0	IAA 10nM	1.77217
Col0	IAA 10nM	1.712
Col0	IAA 10nM	2.21097
AFB1c	cm	2.57607
AFB1c	cm	2.93517
AFB1c	cm	3.42397
AFB1c	cm	2.8834
AFB1c	cm	2.7044
AFB1c	cm	3.1225
AFB1c	cm	2.62057
AFB1c	cm	1.71827
AFB1c	IAA 10nM	1.65447
AFB1c	IAA 10nM	1.90807
AFB1c	IAA 10nM	2.29217
AFB1c	IAA 10nM	1.7661
AFB1c	IAA 10nM	1.9291
AFB1c	IAA 10nM	1.76153
AFB1c	IAA 10nM	1.98137
AFB1c	IAA 10nM	1.8348
afb1_3	cm	4.25713
afb1_3	cm	3.45367
afb1_3	cm	3.61793
afb1_3	cm	3.113
afb1_3	cm	4.16903
afb1_3	cm	3.52763
afb1_3	IAA 10nM	3.96067
afb1_3	IAA 10nM	2.8078
afb1_3	IAA 10nM	2.65727
afb1_3	IAA 10nM	2.79247
afb1_3	IAA 10nM	3.409
afb1_3	IAA 10nM	3.52687
afb1_3	IAA 10nM	3.4019
afb1_3	IAA 10nM	3.4661
afb1_s	cm	3.33567
afb1_s	cm	3.34533
afb1_s	cm	3.31383
afb1_s	cm	4.044
afb1_s	cm	3.57157
afb1_s	cm	2.80207
afb1_s	cm	3.11127
afb1_s	cm	4.25903
afb1_s	IAA 10nM	1.9922
afb1_s	IAA 10nM	2.2061
afb1_s	IAA 10nM	3.08437
afb1_s	IAA 10nM	2.74877
afb1_s	IAA 10nM	3.2275
afb1_s	IAA 10nM	2.51053
afb1_s	IAA 10nM	2.66937

## Sheet: S4-2g
geno/cond	length (µm)	elongation (µm/min)
col_cm	126.016	3.1504
col_cm	115.227	2.88068
col_cm	117.762	2.94405
col_cm	131.015	3.27537
col_cm	142.029	3.55072
col_cm	111.236	2.7809
col_cm	144.301	3.60752
col_cm	134.834	3.37085
col_cm	119.308	2.9827
col_cm	163.822	4.09555
col_iaa	53.911	1.34777
col_iaa	46.252	1.1563
col_iaa	69.379	1.73447
col_iaa	51.998	1.29995
col_iaa	64.481	1.61203
col_iaa	53.945	1.34862
col_iaa	68.329	1.70823
col_iaa	78.357	1.95893
col_iaa	76.598	1.91495
col_iaa	71.373	1.78432
cngc_cm	120.722	3.01805
cngc_cm	141.665	3.54162
cngc_cm	133.118	3.32795
cngc_cm	179.556	4.4889
cngc_cm	154.004	3.8501
cngc_cm	144.205	3.60513
cngc_cm	191.368	4.7842
cngc_cm	150.121	3.75303
cngc_cm	134.973	3.37432
cngc_iaa	73.059	1.82648
cngc_iaa	72.383	1.80957
cngc_iaa	70.537	1.76343
cngc_iaa	106.808	2.6702
cngc_iaa	87.24	2.181
cngc_iaa	117.474	2.93685
cngc_iaa	62.429	1.56072
cngc_iaa	123.309	3.08272
cngc_iaa	117.255	2.93138
cngc_iaa	100.552	2.5138
cngcomp_cm	111.529	2.78823
cngcomp_cm	109.983	2.74958
cngcomp_cm	95.807	2.39518
cngcomp_cm	91.875	2.29688
cngcomp_cm	97.124	2.4281
cngcomp_cm	95.801	2.39502
cngcomp_cm	113.365	2.83412
cngcomp_cm	123.21	3.08025
cngcomp_cm	104.801	2.62003
cngcomp_cm	97.306	2.43265
cngcomp_iaa	41.64	1.041
cngcomp_iaa	55.493	1.38732
cngcomp_iaa	41.887	1.04717
cngcomp_iaa	49.439	1.23598
cngcomp_iaa	54.364	1.3591
cngcomp_iaa	53.528	1.3382
cngcomp_iaa	40.867	1.02168
cngcomp_iaa	55	1.375
cngcomp_iaa	53.824	1.3456
col_cm	84.664	2.1166
col_cm	112.888	2.8222
col_cm	101.343	2.53357
col_cm	111.122	2.77805
col_cm	121.484	3.0371
col_cm	84.636	2.1159
col_cm	28.174	0.70435
col_cm	100.847	2.52117
col_iaa	83.781	2.09452
col_iaa	76.408	1.9102
col_iaa	62.998	1.57495
col_iaa	61.097	1.52743
col_iaa	86.782	2.16955
col_iaa	70.168	1.7542
col_iaa	62.507	1.56268
col_iaa	45.633	1.14082
col_iaa	83.665	2.09163
cngc_cm	99.269	2.48172
cngc_cm	133.445	3.33613
cngc_cm	99.779	2.49447
cngc_cm	127.251	3.18127
cngc_cm	133.264	3.3316
cngc_cm	83.903	2.09757
cngc_cm	173.682	4.34205
cngc_cm	143.104	3.5776
cngc_cm	148.125	3.70312
cngc_cm	114.194	2.85485
cngc_iaa	79.238	1.98095
cngc_iaa	91.96	2.299
cngc_iaa	71.19	1.77975
cngc_iaa	78.748	1.9687
cngc_iaa	90.508	2.2627
cngc_iaa	103.195	2.57987
cngc_iaa	73.4	1.835
cngc_iaa	114.114	2.85285
cngcomp_cm	85.602	2.14005
cngcomp_cm	75.686	1.89215
cngcomp_cm	114.491	2.86227
cngcomp_cm	108.744	2.7186
cngcomp_cm	119.313	2.98283
cngcomp_cm	90.441	2.26103
cngcomp_cm	79.026	1.97565
cngcomp_cm	101.992	2.5498
cngcomp_cm	115.038	2.87595
cngcomp_iaa	54.001	1.35003
cngcomp_iaa	62.739	1.56848
cngcomp_iaa	73.921	1.84803
cngcomp_iaa	74.451	1.86128
cngcomp_iaa	65.151	1.62878
cngcomp_iaa	63.496	1.5874
cngcomp_iaa	48.54	1.2135
col_cm	117.659	2.94148
col_cm	155.571	3.88928
col_cm	119.986	2.99965
col_cm	94.064	2.3516
col_cm	126.977	3.17442
col_cm	144.364	3.6091
col_cm	137.764	3.4441
col_cm	132.968	3.3242
col_cm	154.635	3.86587
col_cm	115.981	2.89953
col_iaa	85.468	2.1367
col_iaa	85.156	2.1289
col_iaa	94.061	2.35153
col_iaa	55.591	1.38977
col_iaa	68.209	1.70522
col_iaa	69.988	1.7497
col_iaa	102.625	2.56562
col_iaa	92.459	2.31148
col_iaa	80.977	2.02442
col_iaa	97.925	2.44813
cngc_cm	107.342	2.68355
cngc_cm	111.1	2.7775
cngc_cm	172.894	4.32235
cngc_cm	168.942	4.22355
cngc_cm	120.008	3.0002
cngc_cm	132.579	3.31447
cngc_cm	160.242	4.00605
cngc_cm	152.047	3.80118
cngc_cm	140.128	3.5032
cngc_cm	150.736	3.7684
cngc_iaa	97.062	2.42655
cngc_iaa	112.808	2.8202
cngc_iaa	129.394	3.23485
cngc_iaa	113.108	2.8277
cngc_iaa	102.513	2.56283
cngc_iaa	105.922	2.64805
cngc_iaa	115.505	2.88762
cngcomp_cm	127.672	3.1918
cngcomp_cm	89.093	2.22732
cngcomp_cm	64.31	1.60775
cngcomp_iaa	52.53	1.31325
cngcomp_iaa	54.923	1.37308
cngcomp_iaa	56.369	1.40922
cngcomp_iaa	66.919	1.67298
col_cm	148.431	3.71077
col_cm	91.875	2.29688
col_cm	100.703	2.51757
col_cm	140.512	3.5128
col_cm	174.321	4.35802
col_cm	116.351	2.90877
col_cm	108.002	2.70005
col_cm	135.925	3.39812
col_cm	130.424	3.2606
col_cm	145.214	3.63035
col_iaa	79.238	1.98095
col_iaa	110.605	2.76512
col_iaa	60.179	1.50448
col_iaa	87.462	2.18655
col_iaa	64.263	1.60658
col_iaa	75.944	1.8986
col_iaa	48.3	1.2075
col_iaa	83.549	2.08873
col_iaa	64.202	1.60505
col_iaa	86.338	2.15845
col_iaa	90.782	2.26955
cngc_cm	94.108	2.3527
cngc_cm	147.976	3.6994
cngc_cm	118.071	2.95178
cngc_cm	157.607	3.94017
cngc_cm	147.418	3.68545
cngc_cm	183.744	4.5936
cngc_cm	133.128	3.3282
cngc_cm	165.023	4.12558
cngc_cm	135.304	3.3826
cngc_cm	204.114	5.10285
cngc_iaa	42.956	1.0739
cngc_iaa	102.23	2.55575
cngc_iaa	105.623	2.64058
cngc_iaa	110.685	2.76713
cngc_iaa	118.56	2.964
cngc_iaa	108.343	2.70858
cngc_iaa	90.316	2.2579
cngc_iaa	109.454	2.73635
cngc_iaa	105.692	2.6423
cngcomp_cm	87.344	2.1836
cngcomp_cm	28.711	0.717775
cngcomp_cm	91.513	2.28783
cngcomp_cm	83.139	2.07848
cngcomp_iaa	167.902	4.19755
cngcomp_iaa	52.12	1.303
cngcomp_iaa	52.166	1.30415
cngcomp_iaa	60.988	1.5247
cngcomp_iaa	49.938	1.24845
col_cm	134.205	3.35513
col_cm	110.549	2.76372
col_cm	112.888	2.8222
col_cm	86.25	2.15625
col_cm	148.887	3.72218
col_cm	184.623	4.61557
col_cm	114.614	2.86535
col_cm	159.501	3.98753
col_cm	92.046	2.30115
col_cm	132.591	3.31478
col_iaa	71.254	1.78135
col_iaa	77.675	1.94188
col_iaa	100.027	2.50068
col_iaa	78.748	1.9687
col_iaa	90.24	2.256
col_iaa	67.181	1.67952
col_iaa	96.978	2.42445
col_iaa	72.899	1.82248
col_iaa	116.911	2.92278
cngc_cm	200.312	5.0078
cngc_cm	151.673	3.79182
cngc_cm	145.216	3.6304
cngc_cm	165.169	4.12922
cngc_cm	135.224	3.3806
cngc_cm	156.246	3.90615
cngc_cm	146.447	3.66118
cngc_cm	191.147	4.77867
cngc_cm	124.888	3.1222
cngc_cm	102.731	2.56827
cngc_iaa	123.082	3.07705
cngc_iaa	109.344	2.7336
cngc_iaa	90.868	2.2717
cngc_iaa	117.721	2.94303
cngc_iaa	114.951	2.87378
cngc_iaa	103.435	2.58588
cngc_iaa	96.405	2.41012
cngc_iaa	124.96	3.124
cngc_iaa	91.538	2.28845
cngcomp_cm	121.185	3.02962
cngcomp_cm	112.706	2.81765
cngcomp_cm	101.915	2.54787
cngcomp_cm	103.564	2.5891
cngcomp_cm	108.052	2.7013
cngcomp_cm	125.347	3.13368
cngcomp_cm	139.454	3.48635
cngcomp_iaa	81.836	2.0459
cngcomp_iaa	70.644	1.7661
cngcomp_iaa	74.038	1.85095
cngcomp_iaa	68.527	1.71317
cngcomp_iaa	73.29	1.83225
cngcomp_iaa	70.998	1.77495
cngcomp_iaa	74.929	1.87322
cngcomp_iaa	74.97	1.87425
cngcomp_iaa	75.998	1.89995

## Sheet: S4-2h
exp	geno/cond	length	elong
sac5-new11	col_cm	126.016	3.1504
sac5-new11	col_cm	115.227	2.88068
sac5-new11	col_cm	117.762	2.94405
sac5-new11	col_cm	131.015	3.27537
sac5-new11	col_cm	142.029	3.55072
sac5-new11	col_cm	111.236	2.7809
sac5-new11	col_cm	144.301	3.60752
sac5-new11	col_cm	134.834	3.37085
sac5-new11	col_cm	119.308	2.9827
sac5-new11	col_cm	163.822	4.09555
sac5-new11	col_iaa	53.911	1.34777
sac5-new11	col_iaa	46.252	1.1563
sac5-new11	col_iaa	69.379	1.73447
sac5-new11	col_iaa	51.998	1.29995
sac5-new11	col_iaa	64.481	1.61203
sac5-new11	col_iaa	53.945	1.34862
sac5-new11	col_iaa	68.329	1.70823
sac5-new11	col_iaa	78.357	1.95893
sac5-new11	col_iaa	76.598	1.91495
sac5-new11	col_iaa	71.373	1.78432
sac5-new11	cngc_cm	120.722	3.01805
sac5-new11	cngc_cm	141.665	3.54162
sac5-new11	cngc_cm	133.118	3.32795
sac5-new11	cngc_cm	179.556	4.4889
sac5-new11	cngc_cm	154.004	3.8501
sac5-new11	cngc_cm	144.205	3.60513
sac5-new11	cngc_cm	191.368	4.7842
sac5-new11	cngc_cm	150.121	3.75303
sac5-new11	cngc_cm	134.973	3.37432
sac5-new11	cngc_iaa	73.059	1.82648
sac5-new11	cngc_iaa	72.383	1.80957
sac5-new11	cngc_iaa	70.537	1.76343
sac5-new11	cngc_iaa	106.808	2.6702
sac5-new11	cngc_iaa	87.24	2.181
sac5-new11	cngc_iaa	117.474	2.93685
sac5-new11	cngc_iaa	62.429	1.56072
sac5-new11	cngc_iaa	123.309	3.08272
sac5-new11	cngc_iaa	117.255	2.93138
sac5-new11	cngc_iaa	100.552	2.5138
sac5-new11	cngcomp_cm	111.529	2.78823
sac5-new11	cngcomp_cm	109.983	2.74958
sac5-new11	cngcomp_cm	95.807	2.39518
sac5-new11	cngcomp_cm	91.875	2.29688
sac5-new11	cngcomp_cm	97.124	2.4281
sac5-new11	cngcomp_cm	95.801	2.39502
sac5-new11	cngcomp_cm	113.365	2.83412
sac5-new11	cngcomp_cm	123.21	3.08025
sac5-new11	cngcomp_cm	104.801	2.62003
sac5-new11	cngcomp_cm	97.306	2.43265
sac5-new11	cngcomp_iaa	41.64	1.041
sac5-new11	cngcomp_iaa	55.493	1.38732
sac5-new11	cngcomp_iaa	41.887	1.04717
sac5-new11	cngcomp_iaa	49.439	1.23598
sac5-new11	cngcomp_iaa	54.364	1.3591
sac5-new11	cngcomp_iaa	53.528	1.3382
sac5-new11	cngcomp_iaa	40.867	1.02168
sac5-new11	cngcomp_iaa	55	1.375
sac5-new11	cngcomp_iaa	53.824	1.3456
sac5-new12	col_cm	84.664	2.1166
sac5-new12	col_cm	112.888	2.8222
sac5-new12	col_cm	101.343	2.53357
sac5-new12	col_cm	111.122	2.77805
sac5-new12	col_cm	121.484	3.0371
sac5-new12	col_cm	84.636	2.1159
sac5-new12	col_cm	28.174	0.70435
sac5-new12	col_cm	100.847	2.52117
sac5-new12	col_iaa	83.781	2.09452
sac5-new12	col_iaa	76.408	1.9102
sac5-new12	col_iaa	62.998	1.57495
sac5-new12	col_iaa	61.097	1.52743
sac5-new12	col_iaa	86.782	2.16955
sac5-new12	col_iaa	70.168	1.7542
sac5-new12	col_iaa	62.507	1.56268
sac5-new12	col_iaa	45.633	1.14082
sac5-new12	col_iaa	83.665	2.09163
sac5-new12	cngc_cm	99.269	2.48172
sac5-new12	cngc_cm	133.445	3.33613
sac5-new12	cngc_cm	99.779	2.49447
sac5-new12	cngc_cm	127.251	3.18127
sac5-new12	cngc_cm	133.264	3.3316
sac5-new12	cngc_cm	83.903	2.09757
sac5-new12	cngc_cm	173.682	4.34205
sac5-new12	cngc_cm	143.104	3.5776
sac5-new12	cngc_cm	148.125	3.70312
sac5-new12	cngc_cm	114.194	2.85485
sac5-new12	cngc_iaa	79.238	1.98095
sac5-new12	cngc_iaa	91.96	2.299
sac5-new12	cngc_iaa	71.19	1.77975
sac5-new12	cngc_iaa	78.748	1.9687
sac5-new12	cngc_iaa	90.508	2.2627
sac5-new12	cngc_iaa	103.195	2.57987
sac5-new12	cngc_iaa	73.4	1.835
sac5-new12	cngc_iaa	114.114	2.85285
sac5-new12	cngcomp_cm	85.602	2.14005
sac5-new12	cngcomp_cm	75.686	1.89215
sac5-new12	cngcomp_cm	114.491	2.86227
sac5-new12	cngcomp_cm	108.744	2.7186
sac5-new12	cngcomp_cm	119.313	2.98283
sac5-new12	cngcomp_cm	90.441	2.26103
sac5-new12	cngcomp_cm	79.026	1.97565
sac5-new12	cngcomp_cm	101.992	2.5498
sac5-new12	cngcomp_cm	115.038	2.87595
sac5-new12	cngcomp_iaa	54.001	1.35003
sac5-new12	cngcomp_iaa	62.739	1.56848
sac5-new12	cngcomp_iaa	73.921	1.84803
sac5-new12	cngcomp_iaa	74.451	1.86128
sac5-new12	cngcomp_iaa	65.151	1.62878
sac5-new12	cngcomp_iaa	63.496	1.5874
sac5-new12	cngcomp_iaa	48.54	1.2135
sac5-new2-13	col_cm	117.659	2.94148
sac5-new2-13	col_cm	155.571	3.88928
sac5-new2-13	col_cm	119.986	2.99965
sac5-new2-13	col_cm	94.064	2.3516
sac5-new2-13	col_cm	126.977	3.17442
sac5-new2-13	col_cm	144.364	3.6091
sac5-new2-13	col_cm	137.764	3.4441
sac5-new2-13	col_cm	132.968	3.3242
sac5-new2-13	col_cm	154.635	3.86587
sac5-new2-13	col_cm	115.981	2.89953
sac5-new2-13	col_iaa	85.468	2.1367
sac5-new2-13	col_iaa	85.156	2.1289
sac5-new2-13	col_iaa	94.061	2.35153
sac5-new2-13	col_iaa	55.591	1.38977
sac5-new2-13	col_iaa	68.209	1.70522
sac5-new2-13	col_iaa	69.988	1.7497
sac5-new2-13	col_iaa	102.625	2.56562
sac5-new2-13	col_iaa	92.459	2.31148
sac5-new2-13	col_iaa	80.977	2.02442
sac5-new2-13	col_iaa	97.925	2.44813
sac5-new2-13	cngc_cm	107.342	2.68355
sac5-new2-13	cngc_cm	111.1	2.7775
sac5-new2-13	cngc_cm	172.894	4.32235
sac5-new2-13	cngc_cm	168.942	4.22355
sac5-new2-13	cngc_cm	120.008	3.0002
sac5-new2-13	cngc_cm	132.579	3.31447
sac5-new2-13	cngc_cm	160.242	4.00605
sac5-new2-13	cngc_cm	152.047	3.80118
sac5-new2-13	cngc_cm	140.128	3.5032
sac5-new2-13	cngc_cm	150.736	3.7684
sac5-new2-13	cngc_iaa	97.062	2.42655
sac5-new2-13	cngc_iaa	112.808	2.8202
sac5-new2-13	cngc_iaa	129.394	3.23485
sac5-new2-13	cngc_iaa	113.108	2.8277
sac5-new2-13	cngc_iaa	102.513	2.56283
sac5-new2-13	cngc_iaa	105.922	2.64805
sac5-new2-13	cngc_iaa	115.505	2.88762
sac5-new2-13	cngcomp_cm	127.672	3.1918
sac5-new2-13	cngcomp_cm	89.093	2.22732
sac5-new2-13	cngcomp_cm	64.31	1.60775
sac5-new2-13	cngcomp_iaa	52.53	1.31325
sac5-new2-13	cngcomp_iaa	54.923	1.37308
sac5-new2-13	cngcomp_iaa	56.369	1.40922
sac5-new2-13	cngcomp_iaa	66.919	1.67298
sac5-new2-12	col_cm	148.431	3.71077
sac5-new2-12	col_cm	91.875	2.29688
sac5-new2-12	col_cm	100.703	2.51757
sac5-new2-12	col_cm	140.512	3.5128
sac5-new2-12	col_cm	174.321	4.35802
sac5-new2-12	col_cm	116.351	2.90877
sac5-new2-12	col_cm	108.002	2.70005
sac5-new2-12	col_cm	135.925	3.39812
sac5-new2-12	col_cm	130.424	3.2606
sac5-new2-12	col_cm	145.214	3.63035
sac5-new2-12	col_iaa	79.238	1.98095
sac5-new2-12	col_iaa	110.605	2.76512
sac5-new2-12	col_iaa	60.179	1.50448
sac5-new2-12	col_iaa	87.462	2.18655
sac5-new2-12	col_iaa	64.263	1.60658
sac5-new2-12	col_iaa	75.944	1.8986
sac5-new2-12	col_iaa	48.3	1.2075
sac5-new2-12	col_iaa	83.549	2.08873
sac5-new2-12	col_iaa	64.202	1.60505
sac5-new2-12	col_iaa	86.338	2.15845
sac5-new2-12	col_iaa	90.782	2.26955
sac5-new2-12	cngc_cm	94.108	2.3527
sac5-new2-12	cngc_cm	147.976	3.6994
sac5-new2-12	cngc_cm	118.071	2.95178
sac5-new2-12	cngc_cm	157.607	3.94017
sac5-new2-12	cngc_cm	147.418	3.68545
sac5-new2-12	cngc_cm	183.744	4.5936
sac5-new2-12	cngc_cm	133.128	3.3282
sac5-new2-12	cngc_cm	165.023	4.12558
sac5-new2-12	cngc_cm	135.304	3.3826
sac5-new2-12	cngc_cm	204.114	5.10285
sac5-new2-12	cngc_iaa	42.956	1.0739
sac5-new2-12	cngc_iaa	102.23	2.55575
sac5-new2-12	cngc_iaa	105.623	2.64058
sac5-new2-12	cngc_iaa	110.685	2.76713
sac5-new2-12	cngc_iaa	118.56	2.964
sac5-new2-12	cngc_iaa	108.343	2.70858
sac5-new2-12	cngc_iaa	90.316	2.2579
sac5-new2-12	cngc_iaa	109.454	2.73635
sac5-new2-12	cngc_iaa	105.692	2.6423
sac5-new2-12	cngcomp_cm	87.344	2.1836
sac5-new2-12	cngcomp_cm	28.711	0.717775
sac5-new2-12	cngcomp_cm	91.513	2.28783
sac5-new2-12	cngcomp_cm	83.139	2.07848
sac5-new2-12	cngcomp_iaa	167.902	4.19755
sac5-new2-12	cngcomp_iaa	52.12	1.303
sac5-new2-12	cngcomp_iaa	52.166	1.30415
sac5-new2-12	cngcomp_iaa	60.988	1.5247
sac5-new2-12	cngcomp_iaa	49.938	1.24845
sac5-new3-11	col_cm	134.205	3.35513
sac5-new3-11	col_cm	110.549	2.76372
sac5-new3-11	col_cm	112.888	2.8222
sac5-new3-11	col_cm	86.25	2.15625
sac5-new3-11	col_cm	148.887	3.72218
sac5-new3-11	col_cm	184.623	4.61557
sac5-new3-11	col_cm	114.614	2.86535
sac5-new3-11	col_cm	159.501	3.98753
sac5-new3-11	col_cm	92.046	2.30115
sac5-new3-11	col_cm	132.591	3.31478
sac5-new3-11	col_iaa	71.254	1.78135
sac5-new3-11	col_iaa	77.675	1.94188
sac5-new3-11	col_iaa	100.027	2.50068
sac5-new3-11	col_iaa	78.748	1.9687
sac5-new3-11	col_iaa	90.24	2.256
sac5-new3-11	col_iaa	67.181	1.67952
sac5-new3-11	col_iaa	96.978	2.42445
sac5-new3-11	col_iaa	72.899	1.82248
sac5-new3-11	col_iaa	116.911	2.92278
sac5-new3-11	cngc_cm	200.312	5.0078
sac5-new3-11	cngc_cm	151.673	3.79182
sac5-new3-11	cngc_cm	145.216	3.6304
sac5-new3-11	cngc_cm	165.169	4.12922
sac5-new3-11	cngc_cm	135.224	3.3806
sac5-new3-11	cngc_cm	156.246	3.90615
sac5-new3-11	cngc_cm	146.447	3.66118
sac5-new3-11	cngc_cm	191.147	4.77867
sac5-new3-11	cngc_cm	124.888	3.1222
sac5-new3-11	cngc_cm	102.731	2.56827
sac5-new3-11	cngc_iaa	123.082	3.07705
sac5-new3-11	cngc_iaa	109.344	2.7336
sac5-new3-11	cngc_iaa	90.868	2.2717
sac5-new3-11	cngc_iaa	117.721	2.94303
sac5-new3-11	cngc_iaa	114.951	2.87378
sac5-new3-11	cngc_iaa	103.435	2.58588
sac5-new3-11	cngc_iaa	96.405	2.41012
sac5-new3-11	cngc_iaa	124.96	3.124
sac5-new3-11	cngc_iaa	91.538	2.28845
sac5-new3-11	cngcomp_cm	121.185	3.02962
sac5-new3-11	cngcomp_cm	112.706	2.81765
sac5-new3-11	cngcomp_cm	101.915	2.54787
sac5-new3-11	cngcomp_cm	103.564	2.5891
sac5-new3-11	cngcomp_cm	108.052	2.7013
sac5-new3-11	cngcomp_cm	125.347	3.13368
sac5-new3-11	cngcomp_cm	139.454	3.48635
sac5-new3-11	cngcomp_iaa	81.836	2.0459
sac5-new3-11	cngcomp_iaa	70.644	1.7661
sac5-new3-11	cngcomp_iaa	74.038	1.85095
sac5-new3-11	cngcomp_iaa	68.527	1.71317
sac5-new3-11	cngcomp_iaa	73.29	1.83225
sac5-new3-11	cngcomp_iaa	70.998	1.77495
sac5-new3-11	cngcomp_iaa	74.929	1.87322
sac5-new3-11	cngcomp_iaa	74.97	1.87425
sac5-new3-11	cngcomp_iaa	75.998	1.89995
