# Supplementary material for: The AUX1-AFB1-CNGC14 module establishes a longitudinal root surface pH profile
Source: eLife. 2023 Jul 14;12:e85193. doi: 10.7554/eLife.85193 (PMC10414970; doi:10.7554/eLife.85193)
Supplement: Figure 4—source data 1. [file elife-85193-fig4-data1.xlsx]

## Sheet: 4b
distance from root tip (µm)	0	20	40	60	80	100	120	140	160	180	200	220	240	260	280	300	320	340	360	380	400	420	440	460	480	500	520	540	560	580	600	620	640	660	680	700	720	740	760	780	800
col_cm	0.977536	0.981754	0.988405	1.00304	1.01157	1.01169	1.01924	1.01791	1.0197	1.01798	1.02466	1.0306	1.03473	1.04391	1.04312	1.04331	1.04634	1.04531	1.03785	1.02261	1.00471	0.985174	0.956662	0.937457	0.918778	0.902183	0.88801	0.874798	0.868354	0.850852	0.842458	0.838775	0.828381	0.822109	0.820262	0.815567	0.815676	0.809749	0.807939	0.812913	0.811423
col_cm	0.947056	0.952488	0.956437	0.951507	0.95122	0.957013	0.953725	0.960877	0.961895	0.96811	0.979396	0.989735	1.00209	1.00965	1.01814	1.02074	1.02642	1.0389	1.0443	1.05142	1.05263	1.05396	1.05982	1.06439	1.06503	1.06464	1.07181	1.07012	1.07874	1.08286	1.07922	1.06745	1.04457	1.02702	1.0139	1.00145	0.985718	0.965495	0.950225	0.937477	0.926477
col_cm	0.99756	1.00422	1.00738	1.01636	1.02064	1.02553	1.03736	1.02621	1.01972	1.02647	1.02993	1.04111	1.05926	1.0717	1.0801	1.08389	1.09267	1.09737	1.10775	1.10801	1.10162	1.09383	1.07659	1.06075	1.03814	1.01923	1.00143	0.992162	0.975391	0.951644	0.900108	0.925482	0.932988	0.925472	0.915651	0.908352	0.902026	0.896572	0.891569	0.892485	0.885067
col_cm	1.01701	1.02568	1.03058	1.04208	1.05656	1.06366	1.06247	1.06364	1.06269	1.07435	1.0688	1.07619	1.08794	1.10025	1.0976	1.07654	1.0851	1.10555	1.10825	1.09545	1.07843	1.05373	1.03774	1.00989	0.98421	0.973602	0.951171	0.938772	0.921568	0.908378	0.895434	0.889388	0.878857	0.87074	0.864021	0.858549	0.850489	0.850655	0.841167	0.84107	0.835351
col_cm	1.02115	1.03436	1.04042	1.04892	1.06232	1.0707	1.08334	1.08894	1.09257	1.09733	1.10474	1.10493	1.11016	1.11363	1.12191	1.12882	1.1415	1.14275	1.15082	1.15585	1.15456	1.15285	1.1375	1.12002	1.09956	1.08352	1.05992	1.03618	0.998868	0.969308	0.987918	0.975891	0.962043	0.947358	0.932804	0.924242	0.918846	0.911256	0.90049	0.898752	0.891192
col_cm	1.02925	1.04171	1.04537	1.05556	1.06493	1.07487	1.08213	1.07279	1.06939	1.07029	1.06673	1.07641	1.09119	1.09971	1.10024	1.10271	1.09565	1.09352	1.0849	1.06833	1.03679	1.01609	1.00053	0.979032	0.970241	0.964049	0.955791	0.946133	0.936895	0.931079	0.915932	0.914053	0.904417	0.891892	0.886503	0.87973	0.870357	0.869033	0.859796	0.853596	0.846914
col_cm	0.994176	0.996061	1.00432	1.01761	1.028	1.03735	1.05443	1.05732	1.06233	1.07564	1.0806	1.08236	1.08247	1.09241	1.08706	1.08926	1.09251	1.08132	1.07453	1.05383	1.03885	1.03262	1.00888	0.98541	0.969571	0.953962	0.942877	0.926718	0.912167	0.904575	0.901265	0.89213	0.904556	0.90801	0.887361	0.881559	0.880858	0.880732	0.882987	0.889758	0.89117
col_cm	0.988926	0.995884	1.00335	1.01027	1.02269	1.02596	1.02858	1.02996	1.03162	1.03774	1.04168	1.04845	1.05034	1.05823	1.06436	1.05776	1.05107	1.04157	1.02595	1.0021	0.987955	0.97205	0.955904	0.94329	0.937372	0.927838	0.925679	0.919773	0.914789	0.903389	0.90098	0.892778	0.887054	0.879994	0.878456	0.871242	0.867943	0.867038	0.866614	0.866823	0.860319
col_cm	1.01973	1.03387	1.04045	1.05441	1.04961	1.06753	1.06205	1.02535	1.01153	1.04475	1.0634	1.07869	1.08528	1.09151	1.09667	1.09944	1.10293	1.11187	1.1058	1.09622	1.08562	1.08207	1.06726	1.04743	1.02761	1.00955	1.00078	0.98332	0.969679	0.953855	0.943237	0.935746	0.925688	0.917788	0.900091	0.899609	0.891573	0.889836	0.893442	0.891136	0.880639
col_cm	0.975783	0.970346	0.963952	0.970433	0.956014	0.946679
col_cm	1.01059	1.02017	1.02823	1.03371	1.04934	1.05819	1.06732	1.07538	1.08303	1.08992	1.08975	1.08367	1.0825	1.09919	1.11093	1.12825	1.1267	1.13136	1.13807	1.12604	1.10861	1.0965	1.07926	1.06371	1.05171	1.04245	1.02755	1.02044	1.01025	1.00072	0.995635	0.989037	0.978927	0.972144	0.970561	0.965424	0.959059	0.95497	0.953555	0.949319	0.946076
col_cm	1.00435	1.00921	1.01584	1.02331	1.02128	1.02647	1.03304	1.04413	1.04097	1.03396	1.03992	1.04387	1.03914	1.04067	1.03965	1.04412	1.04337	1.0417	1.04739	1.04361	1.04745	1.04408	1.0239	1.00411	0.989838	0.973974	0.967995	0.957974	0.941712	0.936104	0.922083	0.90401	0.893244	0.88678	0.874216	0.872558	0.855903	0.85228	0.85012	0.850806	0.841416
col_cm	1.01593	1.03118	1.0298	1.0459	1.0488	1.0671	1.07288	1.07956	1.07875	1.0879	1.09375	1.09905	1.11213	1.10965	1.1083	1.10612	1.11603	1.11416	1.10399	1.09584	1.07849	1.06429	1.05224	1.03163	1.01432	0.995923	0.980999	0.967828	0.9588	0.947005	0.937563	0.923337	0.915185	0.908505	0.90601	0.899699	0.894293	0.888873	0.88446	0.884566	0.878313
col_cm	1.00095	1.01246	1.01983	1.02681	1.02702	1.02958	1.04738	1.04978	1.06114	1.05937	1.04532	1.04258	1.05355	1.07039	1.08297	1.09224	1.10341	1.10708	1.10869	1.10955	1.1062	1.10191	1.06798	1.0394	1.02345	0.998262	0.982281	0.970964	0.960042	0.945187	0.938972	0.931647	0.916063	0.902658	0.89041	0.879233	0.867714	0.859761	0.856795	0.849891	0.849271
col_cm	1.02974	1.03419	1.042	1.03274	1.04564	1.04903	1.05745	1.0732	1.07846	1.08434	1.08896	1.08312	1.08767	1.09963	1.11095	1.11593	1.11641	1.12361	1.12176	1.11913	1.11245	1.0915	1.0747	1.05871	1.03955	1.01903	0.998224	0.982649	0.965267	0.944808	0.92859	0.914476	0.900147	0.88605	0.871382	0.867636	0.859812	0.859007	0.853353	0.856048	0.859508
col_cm	1.03872	1.05211	1.06498	1.07967	1.09033	1.09397	1.10453	1.10439	1.11591	1.11095	1.12106	1.13085	1.11948	1.1162	1.11966	1.12129	1.12808	1.13229	1.1213	1.10467	1.08521	1.06271	1.03932	1.02702	1.00817	0.98551	0.972794	0.959959	0.946241	0.932311	0.927089	0.915306	0.906269	0.899443	0.893894	0.897089	0.887236	0.882409	0.881404	0.878447	0.871108
col_cm	1.03456	1.0432	1.05308	1.0602	1.06992	1.07988	1.09118	1.09876	1.08981	1.08519	1.08968	1.109	1.12288	1.13234	1.14164	1.1431	1.15076	1.15623	1.16045	1.15577	1.14998	1.14046	1.12879	1.0972	1.0883	1.07855	1.06187	1.04208	1.02561	1.00617	1.00073	0.987454	0.9732	0.961493	0.954566	0.943104	0.9291	0.920377	0.906121	0.896818	0.892002
col_cm	0.997212	1.00745	1.01139	1.02517	1.03194	1.03932	1.04845	1.05432	1.06022	1.06337	1.07423	1.08629	1.09223	1.10385	1.11175	1.11528	1.10989	1.10242	1.09786	1.08185	1.06297	1.04265	1.01921	1.00554	0.987808	0.969049	0.953577	0.945408	0.931259	0.922114	0.910264	0.909019	0.903762	0.898994	0.895457	0.888595	0.883536	0.881283	0.88148	0.8859	0.879425
col_cm	0.990677	0.98726	0.996626	1.00469	1.01072	1.01344	1.02022	1.03075	1.0319	1.03998	1.04109	1.0448	1.04889	1.05588	1.06204	1.07663	1.06852	1.07745	1.07882	1.07457	1.06035	1.03086	1.02554	1.02246	1.0261	1.0122	0.989188	0.985331	0.972018	0.9706	0.963128	0.957831	0.949897	0.943414	0.93856	0.93584	0.928795	0.925464	0.921161	0.919821	0.91907
col_cm	0.973656	0.982693	0.996378	1.00532	1.00565	1.00722	1.0231	1.02565	1.03657	1.03366	1.03079	1.02998	1.04534	1.06533	1.07553	1.07458	1.06102	1.0511	1.04169	1.02327	1.01147	0.990977	0.973396	0.955298	0.939776	0.916227	0.900762	0.888593	0.877477	0.870322	0.858043	0.846221	0.839009	0.833041	0.828537	0.830339	0.825114	0.823555	0.819178	0.817749	0.817476
col_cm	0.977769	0.979599	0.983221	0.996362	1.00038	1.01288	1.02064	1.0257	1.02866	1.03479	1.04126	1.03957	1.03837	1.02475	1.01676	0.99753	0.982119	0.964395	0.951431	0.936418	0.922314	0.906254	0.897741	0.88561	0.881793	0.869623	0.866763	0.863741	0.853131	0.851771	0.848906	0.837542	0.830544	0.832261	0.826907	0.825437	0.828548	0.826119	0.826077	0.822137	0.820008
col_cm	0.98414	0.990109	1.00181	1.01279	1.01732	1.02761	1.03828	1.05073	1.05745	1.06515	1.06566	1.06344	1.07233	1.08329	1.09702	1.10694	1.11772	1.11989	1.11418	1.10021	1.09301	1.08367	1.08886	1.09343	1.08578	1.06837	1.05268	1.04017	1.0229	1.0045	0.991303	0.983161	0.966433	0.957324	0.946809	0.94031	0.935823	0.928063	0.918303	0.917887	0.907362
col_cm	0.990801	1.00504	1.0103	1.0218	1.0284	1.03673	1.04975	1.04293	1.04768	1.04603	1.04825	1.05369	1.0718	1.08404	1.09434	1.09685	1.10438	1.10543	1.11318	1.11368	1.10104	1.09161	1.07916	1.06436	1.04477	1.02553	1.01142	1.00126	0.984639	0.973589	0.959903	0.951485	0.940732	0.931049	0.926387	0.915636	0.910139	0.90635	0.893682	0.899836	0.892382
col_cm	0.982724	0.996495	0.998615	1.00656	1.01535	1.03173	1.04383	1.04283	1.04648	1.04957	1.05345	1.06252	1.07015	1.07757	1.07743	1.08626	1.09923	1.10271	1.11747	1.12622	1.12734	1.12359	1.11114	1.08677	1.06007	1.02737	0.997518	0.973938	0.952346	0.939507	0.927443	0.909019	0.895752	0.888387	0.876828	0.869619	0.862177	0.855336	0.848655	0.846098	0.836967
col_cm	0.99763	0.998959	0.999009	1.00813	1.00967	1.00407	1.00994	1.01723	1.02323	1.02653	1.03068	1.02896	1.03331	1.03761	1.04251	1.04802	1.04997	1.05054	1.06332	1.05405	1.04755	1.03012	1.01591	0.9917	0.969317	0.953681	0.938133	0.921672	0.906565	0.896136	0.886244	0.872822	0.866387	0.859861	0.856427	0.843897	0.83893	0.829041	0.824023	0.82373	0.820234
col_cm	0.990324	0.9984	1.00755	1.00676	1.01062	1.0155	1.01502	1.0196	1.02635	1.03132	1.03116	1.03422	1.03772	1.04242	1.04832	1.05529	1.05932	1.06898	1.06274	1.05293	1.04448	1.03415	1.02519	1.01164	0.992168	0.969849	0.954714	0.935205	0.915231	0.900714	0.887797	0.874546	0.864857	0.85748	0.849763	0.844027	0.83912	0.830039	0.830476	0.826561	0.823409
col_cm	0.991176	0.997672	0.99957	1.01526	1.02245	1.03613	1.03574	1.03974	1.03452	1.03677	1.04601	1.03254	1.02921	1.04584	1.05886	1.06191	1.07923	1.08268	1.09372	1.09309	1.07856	1.05221	1.03558	1.0209	0.99938	0.975712	0.953304	0.93356	0.914584	0.902388	0.889084	0.881603	0.869409	0.863103	0.848325	0.841147	0.837182	0.825791	0.818811	0.81604	0.807018
col_cm	1.01147	1.01365	1.0286	1.03586	1.03969	1.04523	1.05616	1.06661	1.06619	1.06327	1.05696	1.0748	1.07453	1.08163	1.10281	1.10008	1.10199	1.1104	1.10352	1.11069	1.10076	1.09706	1.09186	1.07363	1.05614	1.02488	1.00478	0.987127	0.96344	0.947763	0.933792	0.924726	0.913018	0.89805	0.895024	0.885215	0.88244	0.877002	0.86846	0.861455	0.858566
col_cm	1.0094	1.01494	1.02798	1.03621	1.03674	1.04397	1.04713	1.04328	1.05015	1.05569	1.04889	1.0506	1.05966	1.07736	1.08229	1.09222	1.10326	1.11355	1.12753	1.13083	1.12608	1.11775	1.0959	1.06787	1.03998	1.00653	0.988172	0.966835	0.946611	0.935467	0.916238	0.897621	0.885341	0.877048	0.870937	0.859411	0.855012	0.851299	0.845636	0.840063	0.831496
col_cm	0.988509	0.986373	0.997666	0.997463	0.998894	1.00149	1.00544	0.996369	0.997038	0.999258	1.00195	0.997933	1.00287	0.998095	1.00267	0.996046	0.995993	0.990501	0.983564	0.967068	0.957556	0.948093	0.931769	0.919641	0.903476	0.89267	0.882508	0.873722	0.869428	0.866375	0.864145	0.866145	0.857918	0.855792	0.856733	0.857516	0.854023	0.854919	0.85175	0.848233	0.85169
col_cm	1.00934	1.01662	1.0155	1.02394	1.02636	1.02859	1.03619	1.04479	1.04165	1.03964	1.04377	1.0458	1.04943	1.04476	1.03706	1.03613	1.04008	1.07407	1.08971	1.09605	1.09279	1.08171	1.07181	1.06908	1.06363	1.03961	1.03378	1.02502	1.00604	0.993175	0.982939	0.965694	0.950964	0.935317	0.922153	0.915511	0.906057	0.896898	0.891007	0.883875	0.876724
col_cm	0.990947	0.989116	0.992788	0.989624	0.998205	1.00238	1.00792	1.01788	1.02026	1.01692	1.01906	1.02315	1.02633	1.02792	1.0354	1.03916	1.04224	1.04232	1.04109	1.03962	1.02783	1.01266	0.996573	0.981635	0.968021	0.950733	0.934201	0.9167	0.903616	0.893401	0.877255	0.869765	0.864934	0.849077	0.844277	0.83432	0.826415	0.823559	0.822849	0.818355	0.814985
col_cm	0.99462	1.00543	1.00501	1.00741	1.00799	1.01001	1.00931	1.017	1.01316	1.00728	1.00905	1.01304	1.018	1.01644	1.0147	1.01812	1.01929	1.0302	1.02943	1.03439	1.04088	1.03065	1.02581	1.0043	0.999219	0.994304	0.980798	0.972691	0.963926	0.962465	0.947242	0.941457	0.931296	0.921175	0.910307	0.903833	0.898676	0.885198	0.882787	0.87787	0.868741
col_cm	0.993449	1.00009	1.00604	1.01325	1.02139	1.02934	1.03969	1.03802	1.02713	1.02054	1.01931	1.01041	1.02925	1.03878	1.04522	1.06231	1.06778	1.07689	1.0804	1.09503	1.09625	1.09456	1.0872	1.07322	1.0475	1.02856	0.993793	0.977487	0.95888	0.941493	0.921695	0.901075	0.889784	0.87178	0.865287	0.852649	0.848359	0.838811	0.826715	0.822718	0.815235
col_cm	0.999329	1.00367	1.00975	1.00814	1.01589	1.01776	1.03177	1.03379	1.02971	1.02812	1.02918	1.03235	1.0425	1.04196	1.05234	1.05179	1.04974	1.04643	1.03707	1.01726	0.988265	0.971606	0.953854	0.934553	0.917452	0.89584	0.880596	0.872626	0.861112	0.852409	0.844595	0.842404	0.837476	0.831443	0.824353	0.823471	0.821268	0.817033	0.818578	0.81657	0.814059
col_cm	1.00965	1.01742	1.01254	1.02626	1.02703	1.0288	1.04749	1.03859	1.04137	1.03342	1.02837	1.04258	1.04578	1.04219	1.03257	1.06366	1.07513	1.06908	1.06303	1.07011	1.08206	1.08293	1.07658	1.06322	1.04795	1.02797	1.00406	0.985898	0.957466	0.934895	0.923436	0.91002	0.88855	0.874325	0.873715	0.867291	0.8649	0.853402	0.846717	0.839373	0.831773
col_cm	1.01415	1.0117	1.01119	1.02176	1.01995	1.02243	1.02978	1.02924	1.0254	1.02941	1.0293	1.02989	1.03208	1.03016	1.02212	1.02541	1.03553	1.04253	1.03971	1.04178	1.03343	1.01405	1.0069	0.99139	0.979354	0.968275	0.947091	0.930077	0.919431	0.911051	0.904123	0.891234	0.8808	0.880031	0.878057	0.876312	0.8707	0.859482	0.848243	0.838451	0.829039
tir_cm	0.964782	0.977287	0.976209	0.97533	0.993147	0.987014	0.988986	1.00028	1.00405	1.0136	1.02234	1.02483	1.03383	1.03741	1.0316	1.0222	1.02076	1.00819	0.989706	0.971093	0.953132	0.933804	0.920073	0.906708	0.886298	0.876216	0.867004	0.859828	0.855521	0.842583	0.843166	0.838798	0.82867	0.827625	0.826858	0.823948	0.821325	0.819245	0.817599	0.823121	0.824726
tir_cm	1.0193	1.02517	1.04189	1.04623	1.06976	1.0778	1.08393	1.09134	1.08753	1.07045	1.06584	1.09352	1.1184	1.12455	1.13272	1.13323	1.1328	1.12425	1.11951	1.10548	1.07868	1.0569	1.04152	1.0182	1.00044	0.986362	0.969973	0.95602	0.937943	0.933239	0.91564	0.904785	0.896901	0.892367	0.890572	0.883704	0.879844	0.876584	0.873797	0.871027	0.870488
tir_cm	0.998097	1.00879	1.0235	1.01972	1.03409	1.04298	1.04937	1.06335	1.06103	1.06549	1.06014	1.06271	1.07366	1.09112	1.10407	1.10682	1.1042	1.09571	1.09055	1.07764	1.06952	1.05108	1.03257	1.01395	0.999561	0.980794	0.966243	0.949714	0.936543	0.934492	0.922913	0.920099	0.911561	0.901815	0.900467	0.886164	0.882324	0.882613	0.875683	0.87396	0.872257
tir_cm	0.965868	0.973162	0.979283	0.975306	0.969963	0.976575	0.99147	1.00226	1.00434	0.998667	1.00337	1.00577	1.01245	1.00906	1.00233	1.01226	1.00315	0.989172	0.978081	0.961566	0.940045	0.923717	0.913011	0.898741	0.893148	0.878308	0.870543	0.857693	0.853451	0.845807	0.839733	0.835468	0.826976	0.824018	0.82056	0.816468	0.822733	0.816511	0.819824	0.823409	0.823553
tir_cm	0.969084	0.979067	0.986818	1.00053	1.01507	1.02431	1.02305	1.03065	1.02731	1.02822	1.02267	1.02655	1.02347	1.02611	1.02873	1.02557	1.00744	1.01688	1.03088	1.02405	1.00366	0.980579	0.963496	0.954133	0.935123	0.92536	0.910164	0.901782	0.897108	0.882862	0.87065	0.860315	0.854626	0.851611	0.848314	0.844059	0.842278	0.840268	0.828238	0.825702	0.819086
tir_cm	0.970497	0.971938	0.977198	0.996962	1.00268	1.01752	1.03	1.02973	1.02497	1.02081	1.01395	1.01762	1.02773	1.01856	1.029	1.03438	1.03571	1.03907	1.02886	1.01083	0.998731	0.97663	0.946881	0.931737	0.910534	0.891619	0.877828	0.858988	0.84883	0.836972	0.82999	0.822591	0.820884	0.809586	0.805852	0.800118	0.797707	0.795104	0.792124	0.792449	0.791285
tir_cm	0.984683	0.995186	1.01082	1.02233	1.02574	1.02623	1.04538	1.05362	1.05685	1.06495	1.0695	1.06349	1.06795	1.06489	1.06804	1.05672	1.03949	1.02792	1.00313	0.987838	0.964949	0.946957	0.928597	0.915447	0.902177	0.888872	0.872709	0.860169	0.847903	0.838927	0.829376	0.819969	0.816098	0.814089	0.806457	0.807015
tir_cm	0.998987	1.01159	1.02779	1.04053	1.04997	1.06195	1.07374	1.08766	1.08996	1.09861	1.09561	1.09451	1.08122	1.06568	1.04763	1.02407	1.0085	0.985424	0.965148	0.944553	0.925944	0.905866	0.896631	0.887856	0.877913	0.872943	0.868579	0.862086	0.852762	0.846097	0.837405	0.836123	0.833613	0.826309	0.826312	0.824235	0.818439
tir_cm	0.995553	1.01123	1.01903	1.03096	1.04079	1.05145	1.05875	1.06441	1.07187	1.07756	1.07999	1.07961	1.07915	1.08956	1.08544	1.08269	1.06436	1.03996	1.02101	0.997021	0.973115	0.950607	0.938558	0.925886	0.915196	0.90348	0.890102	0.877185	0.873817	0.867661	0.863661	0.856402	0.857302	0.84995	0.841985	0.843178	0.84621	0.844779	0.843287	0.839115	0.837181
tir_cm	0.999106	1.00268	1.01815	1.02511	1.03782	1.04655	1.04871	1.04151	1.03968	1.0416	1.04189	1.04723	1.04582	1.04592	1.05016	1.03852	1.02582	1.00611	0.9913	0.969911	0.952366	0.941474	0.926719	0.91332	0.904342	0.893249	0.887003	0.884992	0.875007	0.863102	0.865508	0.863447	0.871148	0.869212	0.861928	0.860885	0.858818	0.866342	0.856541	0.861432	0.861257
tir_cm	0.978165	0.984785	0.980715	0.986652	1.00191	1.00946	1.02815	1.03507	1.03354	1.03773	1.03633	1.02775	1.0224	1.01261	1.00383	0.987729	0.977054	0.956943	0.941463	0.923844	0.914674	0.902551	0.884533	0.877764	0.871625	0.860983	0.85906	0.858727	0.861664	0.855742	0.857954	0.858043	0.859103	0.861686	0.856576	0.861646	0.862819	0.860312	0.857134	0.855345	0.854533
tir_cm	1.0017	1.01692	1.02504	1.03352	1.04839	1.05694	1.06576	1.06952	1.06756	1.07313	1.06886	1.06884	1.06575	1.06664	1.06656	1.05569	1.05024	1.03978	1.02666	1.01089	0.991718	0.968949	0.949022	0.934349	0.915406	0.900529	0.891341	0.883319	0.873267	0.8674	0.862168	0.85895	0.858644	0.855207	0.855842	0.859105	0.86008	0.860045	0.858865	0.847322	0.848
tir_cm	0.913487	0.922616	0.928235	0.931192	0.941284	0.952184	0.953266	0.953328	0.960046	0.963959	0.96535	0.967799	0.961953	0.957661	0.940409	0.926131	0.908169	0.885395	0.865052	0.846003	0.831982	0.811859	0.80141	0.794248	0.788487	0.785119	0.778006	0.779346	0.773404	0.773353	0.770645	0.769631	0.765386	0.759084	0.762635	0.75672	0.754162	0.755509	0.748531	0.746391	0.737754
tir_cm	0.944951	0.954126	0.958181	0.970418	0.977745	0.978934	0.985741	0.985692	0.984322	0.983774	0.980365	0.978053	0.976284	0.984161	0.978018	0.968449	0.967509	0.965515	0.955588	0.943367	0.925818	0.917963	0.90369	0.891499	0.88269	0.878505	0.869832	0.864674	0.856197	0.849277	0.847045	0.840333	0.832992	0.830729	0.823609	0.816543	0.808108	0.802112	0.78954	0.780452	0.772573
tir_cm	0.959691	0.966937	0.969038	0.974518	0.983733	0.996312	0.99801	1.00395	1.00729	1.0034	1.00347	0.996712	0.99617	0.990064	0.976216	0.961298	0.954039	0.94343	0.9338	0.928654	0.921961	0.921714	0.919614	0.915078	0.916371	0.916043	0.911955	0.909486	0.906236	0.89887	0.887837	0.884233	0.873954	0.868311	0.860713	0.852942	0.842868	0.836686	0.831934	0.827903	0.816929
tir_cm	0.969348	0.976706	0.981348	0.983672	0.984126	0.987541	0.984169	0.981162	0.976531	0.978229	0.976724	0.972371	0.9713	0.964421	0.947567	0.936116	0.923136	0.914039	0.899954	0.889425	0.871193	0.858076	0.849864	0.839359	0.833366	0.826299	0.824354	0.813136	0.808391	0.800029	0.795534	0.793137	0.788441	0.79017	0.786979	0.784958	0.780775	0.777538	0.776271	0.781746	0.781994
tir_cm	0.949958	0.955726	0.958509	0.960177	0.959394	0.968327	0.962683	0.958795	0.956582	0.965994	0.964753	0.970338	0.971086	0.972202	0.964585	0.965396	0.9562	0.952814	0.950572	0.936076	0.928765	0.908276	0.890735	0.879103	0.861717	0.858599	0.851777	0.852459	0.844424	0.837724	0.823432	0.810921	0.804795	0.802135	0.795769	0.792771	0.792843	0.786454	0.774689	0.779134	0.77199
tir_cm	0.915461	0.918102	0.919048	0.913863	0.91476	0.911501	0.906146	0.904734	0.904383	0.902416	0.907542	0.915543	0.921819	0.917054	0.922301	0.922841	0.912403	0.894401	0.882025	0.870396	0.857875	0.843349	0.837648	0.831912	0.825732	0.824289	0.813971	0.802289	0.797126	0.796078	0.789555	0.784302	0.780888	0.779475	0.777173	0.775733	0.773467	0.769409	0.767534	0.770061	0.767132
tir_cm	0.946131	0.950587	0.960305	0.960022	0.962349	0.953421	0.956259	0.950686	0.941881	0.939693	0.934332	0.924145	0.923885	0.923774	0.917393	0.909576	0.897637	0.887974	0.881987	0.874177	0.860778	0.849959	0.836543	0.822441	0.812676	0.800044	0.796118	0.785816	0.780991	0.77575	0.766814	0.763203	0.761547	0.762067	0.758612	0.755299	0.752183	0.748732	0.751228	0.74885	0.744216
tir_cm	0.935223	0.940886	0.934878	0.9338	0.943333	0.939512	0.936436	0.940034	0.929746	0.924768	0.92439	0.925275	0.923913	0.920126	0.910017	0.896086	0.888416	0.878484	0.872609	0.868412	0.855962	0.842351	0.83245	0.823993	0.817462	0.808263	0.805216	0.795981	0.794246	0.793222	0.789664	0.782317	0.779359	0.778372	0.778801	0.769066	0.773022	0.768827	0.765701	0.76586	0.761175
tir_cm	0.961467	0.961767	0.963178	0.969691	0.973247	0.966031	0.966317	0.964227	0.959199	0.960016	0.957992	0.955767	0.953543	0.958137	0.962764	0.964751	0.959185	0.964062	0.96429	0.958956	0.952054	0.937945	0.925338	0.916227	0.894681	0.877324	0.866778	0.854214	0.844342	0.835243	0.831888	0.822098	0.811868	0.81116	0.810097	0.802201	0.802952	0.794867	0.791066	0.789851	0.790098
tir_cm	0.973691	0.975551	0.983069	0.985146	0.995263	0.998165	0.996682	1.00017	0.991841	0.983824	0.984348	0.988786	0.989737	0.990684	0.988999	0.990014	0.985591	0.976356	0.969904	0.960498	0.950412	0.939283	0.9315	0.915027	0.899179	0.889843	0.873494	0.864807	0.849619	0.842266	0.83204	0.826273	0.823982	0.816742	0.819949	0.812067	0.80514	0.806594	0.801261	0.796476	0.791531
tir_cm	1.00347	1.01036	1.0079	0.99868	1.00279	1.00996	1.01033	1.00364	0.992536	0.996325	1.00332	0.993053	0.99091	0.989262	0.989435	0.977519	0.963695	0.953684	0.946331	0.933242	0.917555	0.907713	0.899297	0.892256	0.884593	0.87873	0.868831	0.85654	0.84834	0.846054	0.833451	0.825858	0.825297	0.825246	0.82411	0.81896	0.814333	0.811324	0.807308	0.806033	0.808415
tir_cm	0.983679	0.987085	0.986541	0.992024	0.988794	0.983943	0.977	0.969917	0.96028	0.943579	0.943169	0.950669	0.949267	0.947493	0.937195	0.928341	0.92081	0.906607	0.894676	0.875486	0.863259	0.854365	0.838754	0.824807	0.818067	0.805121	0.803667	0.801892	0.801834	0.795152	0.790078	0.786218	0.779172	0.777597	0.776533	0.767867	0.766125	0.767026	0.764995	0.763941	0.762941
tir_cm	1.02386	1.03188	1.02698	1.01583	1.01203	1.00345	0.997681	0.98247	0.968402	0.948579	0.937775	0.923555	0.91571	0.903909	0.891718	0.883128	0.870162	0.860014	0.855546	0.845367	0.839025	0.830667	0.822542	0.81245	0.806537	0.80035	0.797838	0.796183	0.786918	0.788861	0.783336	0.781336	0.776401	0.772746	0.771263	0.769624	0.768434	0.767144	0.769269	0.769398	0.768619
col_iaa	1.08361	1.08769	1.09978	1.11405	1.11586	1.13032	1.12451	1.13	1.14125	1.16126	1.17906	1.17804	1.18589	1.18682	1.19602	1.20932	1.21444	1.2229	1.23283	1.231	1.22469	1.20613	1.19118	1.17377	1.15455	1.1349	1.1209	1.09969	1.09371	1.07749	1.07061	1.05656	1.04661	1.04483	1.03027	1.02744	1.02222	1.01535	1.01124	1.00255	1.00132
col_iaa	1.05933	1.06802	1.07669	1.09787	1.11076	1.12881	1.14315	1.1498	1.16228	1.18449	1.19393	1.1944	1.20869	1.22725	1.22071	1.21721	1.20535	1.20039	1.19241	1.17955	1.16234	1.14126	1.11644	1.10326	1.09101	1.07859	1.0681	1.0589	1.05691	1.04961	1.04229	1.03639	1.02762	1.02489	1.02296	1.01678	1.00856	1.00968	1.00597	1.00081	0.996448
col_iaa	1.05767	1.06836	1.08242	1.09181	1.08942	1.0907	1.11337	1.12791	1.12692	1.12385	1.12175	1.12315	1.14662	1.16729	1.18223	1.18985	1.19117	1.18561	1.17803	1.17311	1.15433	1.13029	1.11661	1.09705	1.0847	1.0682	1.05817	1.04776	1.04089	1.03353	1.02173	1.01902	1.00817	1.00241	0.997477	0.989326	0.982044	0.978165	0.978914	0.975948	0.970974
col_iaa	1.04751	1.05441	1.0605	1.07626	1.07927	1.08405	1.09011	1.0897	1.0929	1.09155	1.0966	1.09616	1.09623	1.09064	1.0852	1.07558	1.06534	1.05585	1.04864	1.03442	1.0213	1.01005	1.00094	0.98997	0.982842	0.978229	0.978065	0.96982	0.96836	0.95839	0.962976	0.959564	0.959281	0.953533	0.955503	0.956943	0.957992	0.956186	0.959878	0.960445	0.958289
col_iaa	1.04905	1.05811	1.0634	1.07364	1.08515	1.09084	1.09757	1.101	1.11016	1.11225	1.11784	1.13225	1.13995	1.14416	1.15441	1.16276	1.15879	1.1578	1.14791	1.12924	1.11478	1.0995	1.08944	1.07293	1.05779	1.04503	1.03317	1.01909	1.02149	1.01912	1.01291	1.00754	1.01271	1.00689	1.0059	0.997037	0.99132	0.984279	0.983352	0.981153	0.980178
col_iaa	1.04967	1.05647	1.06493	1.07281	1.08783	1.10135	1.11158	1.11895	1.12378	1.12619	1.13452	1.14691	1.15545	1.16634	1.17127	1.17383	1.17158	1.15667	1.14941	1.13262	1.12212	1.10938	1.09669	1.08307	1.06599	1.05837	1.05157	1.04495	1.03393	1.02898	1.02582	1.01709	1.01634	1.01328	1.00896	1.00433	1.00215	1.00065	1.00545	1.00027	1.00331
col_iaa	1.04746	1.05238	1.05723	1.06803	1.07495	1.07382	1.07586	1.08236	1.08659	1.09766	1.12164	1.13148	1.14072	1.17145	1.18293	1.19117	1.18954	1.19146	1.18443	1.17048	1.16162	1.15306	1.13421	1.12135	1.10796	1.09854	1.07854	1.06331	1.05439	1.05223	1.04917	1.05081	1.04729	1.04256	1.0376	1.03978	1.03831	1.04846	1.04265	1.03837	1.03316
col_iaa	1.06297	1.06681	1.08576	1.09864	1.10887	1.11596	1.12307	1.13903	1.15333	1.16603	1.18174	1.19664	1.2023	1.21356	1.22356	1.21766	1.20631	1.20089	1.18537	1.1666	1.14573	1.1337	1.12072	1.10626	1.09712	1.09068	1.08439	1.07877	1.06951	1.06265	1.05754	1.05135	1.04742	1.04725	1.04404	1.0376	1.03361	1.02906	1.02315	1.02153	1.0123
col_iaa	1.08532	1.09207	1.09069	1.092	1.09367	1.10746	1.12025	1.1312	1.14065	1.14473	1.15427	1.15966	1.16622	1.18265	1.18664	1.20176	1.21618	1.21806	1.21412	1.20705	1.18834	1.16755	1.15499	1.14379	1.12705	1.12098	1.11341	1.10354	1.0948	1.09361	1.09216	1.08117	1.07541	1.07389	1.0746	1.06706	1.07373	1.06473	1.05883	1.05756	1.05118
col_iaa	1.07438	1.08326	1.08756	1.0952	1.10145	1.11064	1.12063	1.12496	1.13286	1.14115	1.14141	1.15273	1.14822	1.14488	1.18821	1.20268	1.20501	1.1937	1.19314	1.18395	1.17254	1.16047	1.1396	1.12443	1.10396	1.10143	1.08491	1.07331	1.05797	1.04443	1.04758	1.04036	1.03578	1.03334	1.0295	1.02825	1.02241	1.01794	1.01357	1.01559	1.01074
col_iaa	1.04604	1.04558	1.0493	1.06997	1.07503	1.08043	1.09007	1.10141	1.10678	1.11395	1.13238	1.12849	1.12499	1.12552	1.12305	1.11617	1.11475	1.09838	1.08765	1.06633	1.05763	1.0524	1.04486	1.03568	1.03628	1.0271	1.02182	1.0266	1.01925	1.0174	1.01041	1.00602	1.00966	1.00018	1.00151	0.991118	0.995816	0.997834	0.998829	0.993333	0.98887
col_iaa	1.0519	1.07094	1.07678	1.08434	1.08826	1.09784	1.10612	1.11334	1.12482	1.13707	1.14466	1.16077	1.17123	1.18389	1.19524	1.2146	1.21386	1.22053	1.22019	1.20653	1.19521
col_iaa	1.06564	1.07289	1.08827	1.09049	1.09727	1.10635	1.10682	1.12125	1.13122	1.14405	1.14526	1.16172	1.17414	1.18814	1.20682	1.22669	1.2434	1.25536	1.25944	1.25435	1.25493	1.23894	1.2328
col_iaa	1.0627	1.07722	1.08138	1.09237	1.09874	1.11673	1.11299	1.10348	1.10968	1.10699	1.11443	1.13671	1.16923	1.18111	1.19965	1.21081	1.20952	1.21023	1.20967	1.19126	1.1727	1.15621	1.13448	1.11807	1.10061	1.08431	1.07105	1.06333	1.05408	1.04696	1.03988	1.03672	1.03646	1.03323	1.02521	1.02168	1.01454	1.01034	1.01056	1.0036	1.00269
col_iaa	1.07118	1.07139	1.08117	1.08638	1.09707	1.11248	1.12171	1.12997	1.14535	1.15082	1.15023	1.17594	1.18474	1.20264	1.21846	1.23214	1.24148	1.2448	1.24563	1.24402	1.24032	1.23001	1.20455	1.18141	1.17697	1.15567	1.13986	1.12543	1.10891	1.09558	1.08856	1.07119	1.0589	1.05001	1.0393	1.03577	1.02819	1.01855	1.0175	0.998346	0.995821
col_iaa	1.08158	1.09027	1.10544	1.11091	1.11769	1.12936	1.13753	1.14552	1.15371	1.1541	1.16126	1.16825	1.16759	1.17534	1.19749	1.2112	1.22112	1.2217	1.23502	1.22599	1.21178	1.20539	1.18559	1.16998	1.15296	1.13745	1.12226	1.1083	1.09112	1.08152	1.06835	1.05297	1.0476	1.04211	1.0397	1.03287	1.0217	1.02425	1.01595	1.01266	1.00724
col_iaa	1.06274	1.07277	1.07767	1.08405	1.08915	1.07623	1.08994	1.12669	1.12854	1.13635	1.14892	1.14228	1.12187	1.11484	1.13669	1.12773	1.13607	1.14209	1.14381	1.14799	1.15246	1.14818	1.14449	1.13238	1.12449	1.12447	1.11896	1.10908	1.09599	1.09575	1.08395	1.07418	1.07425	1.06796	1.06228	1.05765	1.05058	1.03969	1.02589	1.02429	1.02263
col_iaa	1.05887	1.06084	1.06869	1.07564	1.08655	1.0985	1.10621	1.11561	1.1231	1.13078	1.1342	1.13188	1.15282	1.16257	1.17231	1.18491	1.19375	1.19674	1.20383	1.20011	1.18968	1.18467	1.18055	1.16266	1.1485	1.11898	1.10083	1.09107	1.08109	1.07423	1.06113	1.05757	1.05271	1.05332	1.04438	1.0444	1.03955	1.02959	1.02806	1.02158	1.01299
col_iaa	1.03053	1.03067	1.0431	1.0463	1.05071	1.06736	1.07644	1.08137	1.08535	1.09013	1.09864	1.10617	1.1234	1.13658	1.14918	1.15959	1.17133	1.17511	1.18241	1.18626	1.19102	1.18996	1.17992	1.15899	1.15443	1.13983	1.1222	1.10879	1.09738	1.08465	1.07832	1.06578	1.05523	1.04539	1.03987	1.03561	1.02566	1.0175	1.01332	1.00817	1.00693
col_iaa	1.01558	1.02168	1.027	1.02938	1.03285	1.03889	1.05252	1.06205	1.06813	1.0715	1.07926	1.08613	1.09187	1.10835	1.11173	1.13079	1.13011	1.13142	1.1487	1.1437	1.14529	1.14053	1.14674	1.13147	1.1268	1.10551	1.09541	1.08459	1.07261	1.0599	1.05373	1.04971	1.04417	1.0434	1.0372	1.02855	1.02483	1.01458	1.0171	1.01642	1.00598
col_iaa	1.01174	1.01897	1.02813	1.04042	1.05098	1.05966	1.06275	1.0834	1.08944	1.0983	1.11034	1.11418	1.12399	1.14595	1.14631	1.12881	1.10507	1.116	1.14316	1.16065	1.17368	1.16206	1.15152	1.13761	1.11745	1.10299	1.09019	1.07482	1.05564	1.04441	1.04559	1.04938	1.04284	1.03706	1.03071	1.02031	1.01138	1.00949	1.00354	0.998967	1.00228
col_iaa	1.0167	1.0248	1.02875	1.03479	1.03878	1.04657	1.0591	1.07066	1.0794	1.09086	1.10114	1.11308	1.12798	1.14104	1.1578	1.16668	1.17928	1.1922	1.20104	1.20417	1.20533	1.20532	1.1994	1.18575	1.16594	1.15107	1.13296	1.11444	1.09529	1.08663	1.06996	1.0589	1.04587	1.04073	1.0335	1.0297	1.02341	1.01692	1.01249	1.00827	1.00002
col_iaa	1.02641	1.0281	1.03737	1.04434	1.05224	1.05703	1.06436	1.0672	1.07276	1.07515	1.08095	1.08802	1.0942	1.0975	1.10925	1.1191	1.12535	1.13045	1.14263	1.13657	1.13427	1.13548	1.12647	1.11826	1.10193	1.084	1.06789	1.04773	1.02802	1.01716	1.00127	0.988448	0.97992	0.975742	0.964153	0.954215	0.950479	0.944979	0.938891	0.9338	0.921785
col_iaa	1.02705	1.04026	1.03678	1.03695	1.05111	1.04997	1.07553	1.0771	1.09021	1.09636	1.10708	1.11688	1.12132	1.13299	1.13767	1.14432	1.15313	1.15714	1.16265	1.15976	1.14508	1.13269	1.11634	1.09625	1.07845	1.06049	1.0488	1.04271	1.02757	1.01513	1.0075	1.00029	0.991091	0.988649	0.983026	0.978973	0.976755	0.969137	0.963465	0.966973	0.961159
col_iaa	1.00351	1.0089	1.01438	1.02033	1.02778	1.02699	1.02832	1.03126	1.04403	1.05208	1.06302	1.08516	1.09136	1.08913	1.10328	1.11811	1.13973	1.15515	1.16135	1.17359	1.17125	1.16436	1.15321	1.12845	1.10793	1.08866	1.06395	1.04769	1.00786	1.01197	1.0014	0.991213	0.983625	0.970733	0.960401	0.952163	0.943192	0.934495	0.928618	0.915613	0.913038
col_iaa	0.997054	1.00652	1.01901	1.02567	1.03827	1.03982	1.04007	1.04089	1.04983	1.06779	1.08275	1.09576	1.10505	1.11828	1.13059	1.13779	1.14605	1.14382	1.13684	1.12364	1.09948	1.08587	1.06535	1.05233	1.03638	1.02099	1.00413	0.998444	0.987128	0.976847	0.975858	0.972285	0.964382	0.960634	0.959988	0.958968	0.955077	0.946594	0.941051	0.946333	0.941479
col_iaa	1.02074	1.03447	1.04059	1.04321	1.04889	1.05657	1.06934	1.07419	1.08117	1.08537	1.08835	1.1055	1.10713	1.12384	1.12822	1.13525	1.15703	1.16959	1.1831	1.18457	1.18478	1.19162	1.19398	1.17694	1.1612	1.14768	1.12785	1.11627	1.10455	1.09212	1.07626	1.06545	1.05441	1.04295	1.03782	1.02687	1.01721	0.998851	0.980688	0.988853	0.985494
col_iaa	1.01049	1.01993	1.02084	1.02499	1.03021	1.04415	1.04464	1.04146	1.03814	1.03764	1.04281	1.05324	1.06118	1.06544	1.08001	1.10146	1.1296	1.15336	1.16815	1.17991	1.18106	1.17947	1.16904	1.16527	1.14691	1.12233	1.09955	1.08297	1.06652	1.05079	1.03963	1.03096	1.02011	1.0115	1.00651	1.00177	0.99334	0.986562	0.97838	0.976518	0.971483
col_iaa	1.02295	1.03138	1.03587	1.03893	1.0495	1.06299	1.06521	1.06488	1.07115	1.07488	1.08194	1.08903	1.09144	1.10274	1.11246	1.12536	1.14131	1.16035	1.16315	1.15499	1.14729	1.13713	1.11872	1.0961	1.08145	1.05657	1.03877	1.0188	0.998877	0.989813	0.980381	0.974455	0.963157	0.954087	0.951366	0.947319	0.93711	0.927654	0.923414	0.914178	0.915573
col_iaa	1.00361	1.00553	1.01576	1.01931	1.0248	1.03199	1.04491	1.04055	1.03956	1.0466	1.05879	1.07457	1.0815	1.09567	1.1108	1.12285	1.12973	1.12507	1.11522	1.09734	1.08392	1.07271	1.05872	1.0544	1.04491	1.03736	1.03171	1.03273	1.02672	1.01817	1.01681	1.00702	0.996751	0.988247	0.982819	0.98368	0.977473	0.963848	0.965493	0.956782	0.956514
col_iaa	1.02006	1.02412	1.02271	1.02571	1.03508	1.04373	1.055	1.06522	1.07673	1.07351	1.07546	1.07764	1.08452	1.09003	1.09737	1.11346	1.11848	1.12074	1.11369	1.10499	1.10302	1.09668	1.07536	1.06527	1.05873	1.0449	1.03714	1.03498	1.03074	1.01962	1.01539	1.0087	1.00654	0.997383	0.986972	0.978939	0.972697	0.96546	0.966899	0.962067	0.950759
col_iaa	1.00044	1.00184	1.00837	1.01617	1.01936	1.02334	1.02114	1.02431	1.01819	1.01937	1.01967	1.02658	1.0333	1.04727	1.05257	1.06152	1.06576	1.06167	1.05733	1.05089	1.04425	1.03561	1.02064	1.01023	1.00921	1.00675	1.00205	0.992616	0.988851	0.988642	0.984435	0.9872	0.985481	0.98893	0.979954	0.986647	0.985937	0.984435	0.983111	0.977752	0.973978
col_iaa	1.02112	1.02523	1.03937	1.04324	1.05432	1.05651	1.05641	1.06411	1.06423	1.06273	1.06028	1.06384	1.07298	1.07976	1.08643	1.09272	1.10312	1.09988	1.09597	1.08759	1.07621	1.058	1.04865	1.03141	1.02963	1.02233	1.02191	1.01485	1.01125	1.01022	1.00125	1.00112	0.992146	0.978794	0.967735	0.959468	0.949577	0.949387	0.933844	0.92931	0.925311
col_iaa	1.03857	1.04359	1.04774	1.06341	1.06891	1.06834	1.08239	1.08743	1.09339	1.09528	1.08232	1.08608	1.10642	1.12121	1.13527	1.15318	1.17396	1.18185	1.18181	1.1912	1.18318	1.18015	1.17563	1.15427	1.13195	1.11997	1.10229	1.09259	1.08605	1.07311	1.0672	1.05477	1.05036	1.04975	1.03665	1.02958	1.02147	1.01409	0.999132	0.99331	0.987041
col_iaa	1.05641	1.05805	1.06514	1.05901	1.06734	1.07058	1.07792	1.07435	1.07675	1.07601	1.07258	1.08046	1.09102	1.09792	1.10178	1.10685	1.11666	1.11095	1.1107	1.09974	1.0962	1.09372	1.08053	1.07008	1.0618	1.06097	1.06086	1.05031	1.0447	1.04548	1.04144	1.028	1.02103	1.01211	1.00622	0.99401	0.988719	0.985095	0.974234	0.967774	0.957534
col_iaa	1.03442	1.04321	1.04598	1.04885	1.05981	1.06627	1.0698	1.07849	1.07805	1.08246	1.08143	1.07971	1.0911	1.09692	1.10777	1.11894	1.13604	1.1613	1.16871	1.16086	1.15492	1.14014	1.12357	1.11322	1.10136	1.09366	1.07799	1.06402	1.05542	1.05028	1.04894	1.0373	1.03499	1.0343	1.03134	1.02531	1.02058	1.02128	1.01002	0.996565	0.991305
col_iaa	1.04778	1.04853	1.05492	1.05903	1.06449	1.06814	1.07172	1.07662	1.08766	1.09196	1.11289	1.12008	1.12967	1.13277	1.13474	1.13849	1.13259	1.12642	1.12243	1.10502	1.09032	1.07741	1.073	1.05268	1.03682	1.02708	1.0138	1.00225	0.994972	0.989926	0.982296	0.96702	0.962569	0.951621	0.941387	0.941139	0.939239	0.934916	0.937054	0.931511	0.927543
tir_iaa	1.03435	1.0473	1.06223	1.0739	1.08628	1.10046	1.10884	1.11294	1.11602	1.12057	1.13672	1.12768	1.13387	1.12503	1.10967	1.08716	1.05214	1.03251	1.00201	0.981559	0.960607	0.943771	0.927231	0.918794	0.914737	0.909817	0.909918	0.905793	0.89997	0.892534	0.893156	0.888504	0.882935	0.873694	0.875302
tir_iaa	1.0403	1.07388	1.06834	1.0529	1.03597	1.02719	1.03268	1.0589	1.04863	1.00743	0.971043	0.951714	0.941381	0.93621	0.930738	0.923178	0.913608	0.915962	0.920799	0.910279	0.884746	0.89647	0.896125	0.895872	0.89853	0.895649	0.889133	0.888118	0.889103	0.886863	0.885223	0.883608	0.881551	0.877037	0.873432	0.865587	0.860963	0.856714	0.85658	0.858573	0.855886
tir_iaa	1.03102	1.05225	1.05086	1.04925	1.04936	1.04341	1.05282	1.05343	1.04367	1.03246	1.02061	1.00043	0.983764	0.967321	0.954892	0.936773	0.918	0.904727	0.89298	0.883145	0.870985	0.86293	0.861781	0.854628	0.851689	0.849424	0.845163	0.838429	0.841766	0.837743	0.834462	0.833441	0.831669	0.830364	0.829239	0.828547	0.834437	0.836177	0.830427	0.835058	0.837523
tir_iaa	1.01745	1.02553	1.03257	1.0431	1.0514	1.06357	1.07449	1.07823	1.07421	1.04938	1.04206	1.05376	1.06552	1.09218	1.11821	1.10799	1.10655	1.10013	1.08451	1.06778	1.04247	1.02699	1.00567	0.992352	0.975248	0.955315	0.944952	0.931603	0.930997	0.922876	0.912731	0.91216	0.90866	0.908176	0.906851	0.893744	0.891303	0.887172	0.885544	0.88555	0.881485
tir_iaa	1.03201	1.04015	1.05194	1.06467	1.07638	1.08029	1.09447	1.10477	1.08708	1.08907	1.08513	1.07126	1.07391	1.04991	1.03104	1.01147	0.986296	0.970186	0.949387	0.942975	0.929559	0.922557	0.920653	0.911609	0.907922	0.901117	0.895457	0.894216	0.886879	0.881742	0.876002	0.873562	0.8659	0.864191	0.858481	0.852815	0.849345	0.847189	0.84575	0.839959	0.834668
tir_iaa	1.03046	1.0489	1.06073	1.0662	1.07828	1.08865	1.0935	1.10032	1.10375	1.1008	1.09649	1.09705	1.10265	1.10184	1.09582	1.09159	1.08627	1.05381	1.04889	1.03843	1.02352	1.01093	0.992855	0.973406	0.958626	0.945242	0.933929	0.924283	0.916799	0.90642	0.894834	0.891701	0.881715	0.875364	0.870395	0.866335	0.864001	0.860934	0.860603	0.853766	0.855002
tir_iaa	0.9782	0.99341	1.00387	0.996339	1.01184	1.0284	1.03648	1.0311	1.02736	1.01125	1.00628	0.99717	0.984648	0.971725	0.953371	0.937813	0.919868	0.903236	0.89497	0.893665	0.888314	0.868856	0.867174	0.867082	0.856545	0.863182	0.855997	0.853676	0.862257	0.858514	0.860074
tir_iaa	1.02305	1.03378	1.04395	1.05527	1.06855	1.07897	1.08952	1.09321	1.09785	1.09607	1.10037	1.09988	1.09978	1.10238	1.10596	1.09604	1.08782	1.07736	1.067	1.05679	1.04169	1.01494	0.998879	0.982348	0.97727	0.971006	0.965136	0.954639	0.943518	0.940339	0.929275	0.927371	0.923946	0.922876	0.916282	0.909948	0.907163	0.903887	0.899499	0.896839	0.890761
tir_iaa	0.983544	0.989335	0.997365	1.00984	1.01542	1.0243	1.02824	1.03411	1.04624	1.05179	1.054	1.05911	1.05126	1.04216	1.03244	1.02052	1.00153	0.988607	0.976413	0.958241	0.937476	0.924442	0.911548	0.901468	0.896277	0.889742	0.885623	0.88269	0.877263	0.872911	0.87101	0.867984	0.868523	0.867005	0.858781	0.862832	0.858744	0.854499	0.854578	0.856592	0.847586
tir_iaa	1.01147	1.01898	1.03674	1.04841	1.06268	1.06575	1.0669	1.05527	1.05244	1.08203	1.09517	1.10397	1.11201	1.11778	1.11681	1.11831	1.1234	1.11995	1.10817	1.09138	1.06834	1.05147	1.02884	1.01466	0.99644	0.980989	0.956876	0.938311	0.92863	0.914806	0.905275	0.898068	0.894725	0.886421	0.878971	0.875355	0.868132	0.86463	0.861528	0.858488	0.860021
tir_iaa	0.98974	0.994865	1.00254	1.01024	1.0252	1.0377	1.04569	1.04634	1.04891	1.05714	1.05509	1.05709	1.06821	1.07041	1.08073	1.08248	1.08631	1.08127	1.06764	1.04604	1.02518	0.996359	0.976425	0.957988	0.946859	0.932631	0.921871	0.911184	0.907815	0.899876	0.898321	0.89132	0.889532	0.890873	0.881925	0.878221	0.876652	0.873803	0.873128	0.873629	0.874185
tir_iaa	0.988576	0.998393	1.00263	1.01147	1.01999	1.02722	1.02461	1.03344	1.03567	1.05211	1.06382	1.07636	1.07244	1.07741	1.08124	1.07466	1.06866	1.05879	1.04349	1.02224	1.00704	0.990107	0.980604	0.969446	0.951503	0.941082	0.937114	0.926482	0.920112	0.910631	0.90066	0.892347	0.881075	0.87511	0.868149	0.861572	0.856645	0.846112	0.838364	0.835572	0.832084
tir_iaa	1.02066	1.03312	1.03551	1.04267	1.04911	1.06627	1.07094	1.0666	1.05532	1.03427	1.02585	1.07187	1.08083	1.07706	1.06635	1.0541	1.04422	1.02532	1.01311	1.00323	0.992602	0.980856	0.973371	0.968436	0.960525	0.958579	0.95825	0.954844	0.949833	0.947296	0.951338	0.94894	0.948467	0.95289	0.950268	0.955395	0.940811	0.944349	0.95074	0.957924	0.973966
tir_iaa	0.988154	0.99383	1.00687	1.01004	1.02215	1.03245	1.03618	1.03096	1.01868	1.00302	0.989724	0.980025	0.962769	0.939008	0.919118	0.902579	0.890268	0.887773	0.88179	0.875997	0.868207	0.860244	0.85824	0.854858	0.849006	0.848481	0.846334	0.846484
tir_iaa	0.980184	0.986003	0.997063	1.00817	1.01785	1.02655	1.04255	1.04897	1.05054	1.05412	1.05001	1.04571	1.04265	1.02335	1.00326	0.988282	0.968816	0.954368	0.938128	0.921761	0.915947	0.916493	0.917393	0.910484	0.911016	0.910434	0.911925	0.914538	0.913187	0.910289	0.910356	0.9094	0.907235	0.907022	0.903557	0.902067	0.90066	0.902483	0.89869	0.893026	0.884775
tir_iaa	1.00192	1.01322	1.02623	1.03095	1.04459	1.05361	1.06348	1.07186	1.07589	1.09213	1.09531	1.09801	1.10039	1.09838	1.09155	1.09415	1.06658	1.05168	1.05603	1.04207	1.02795	1.0125	0.987699	0.980343	0.966862	0.961253	0.952765	0.946248	0.937255	0.938208	0.933622	0.925977	0.921668	0.912699	0.910107	0.905472	0.902562	0.896201	0.893842	0.889307	0.884766
tir_iaa	0.979219	0.984323	0.953613	0.965469	0.987936	1.00137	1.00478	1.00731	1.01405	1.01521	1.02084	1.02076	1.02212	1.0119	1.00592	0.991867	0.970179	0.950028	0.93796	0.917252	0.893169	0.872203	0.857803	0.844602	0.83074	0.813188	0.812102	0.803634	0.7978	0.796245	0.789547	0.789695	0.783285	0.783019	0.779739	0.782778	0.78276	0.779056	0.775508	0.779802	0.781069
tir_iaa	1.00164	1.00418	1.00694	1.00788	1.01248	1.0192	1.02927	1.03962	1.03969	1.0464	1.05066	1.05839	1.0358	1.04753	1.06736	1.07586	1.0735	1.07175	1.06394	1.05859	1.04897	1.0368	1.02416	1.01347	0.997724	0.991937	0.989466	0.974764	0.969314	0.970729	0.964914	0.952039	0.940435	0.929352	0.918116	0.913395	0.902661	0.90172	0.886179	0.877624	0.872943
tir_iaa	1.0017	0.995262	1.00524	1.00384	1.00592	1.00602	1.01339	1.01485	1.01744	1.01605	1.00641	1.00154	0.99415	0.974086	0.970695	0.941018	0.925343	0.903873	0.887646	0.870451	0.85454	0.849038	0.840006	0.831609	0.822462	0.817473	0.811062	0.808884	0.802395	0.798346	0.793303	0.790554	0.789735	0.790771	0.788532	0.785574	0.781009	0.776445	0.774264	0.77193	0.769941
tir_iaa	0.946458	0.955054	0.961118	0.96116	0.951309	0.967959	0.974294	0.979772	0.992147	0.999987	1.00325	1.00782	1.00365	1.01094	1.01094	0.998734	0.986254	0.966394	0.951945	0.926802	0.918137	0.90811	0.889302	0.872821	0.865442	0.852064	0.844193	0.839931	0.82922	0.823895	0.825754	0.813521	0.809221	0.802859	0.794686	0.793931	0.787911	0.78969	0.787935	0.783582	0.781146
tir_iaa	0.978389	0.981858	0.98445	0.976259	0.984983	0.980821	0.981157	0.983021	0.97334	0.973689	0.972661	0.969126	0.96608	0.963259	0.962137	0.963262	0.962856	0.954649	0.950997	0.951451	0.955868	0.955883	0.953042	0.948737	0.945983	0.948032	0.948174	0.945101	0.944046	0.941748	0.943175	0.939754	0.939236	0.941887	0.938551	0.940175	0.938355	0.932527	0.934488	0.93449	0.932298
tir_iaa	1.02682	1.03416	1.04613	1.05092	1.06418	1.07503	1.08139	1.09264	1.09996	1.10093	1.10506	1.10654	1.1073	1.10755	1.0974	1.0928	1.07958	1.0665	1.05386	1.04112	1.02656	1.00457	0.986727	0.975136	0.96812	0.963762	0.954707	0.945268	0.935056	0.932709	0.925744	0.923415	0.919609	0.914467	0.908511	0.89916	0.895696	0.895392	0.886842	0.881673	0.871726
tir_iaa	1.01392	1.02036	1.02836	1.03324	1.04223	1.04638	1.04774	1.0437	1.04285	1.04052	1.03754	1.03815	1.04455	1.03806	1.03208	1.02028	1.00404	0.989915	0.980563	0.958409	0.944434	0.935474	0.917846	0.90826	0.896765	0.882873	0.877255	0.87501	0.862184	0.858586	0.857822	0.852259	0.844424	0.844714	0.838239	0.830975	0.828801	0.82607	0.826178	0.823014	0.812616
tir_iaa	0.999065	1.00381	1.00705	1.02008	1.02887	1.041	1.0436	1.04267	1.05093	1.05257	1.04694	1.04812	1.05156	1.06107	1.04978	1.05777	1.06953	1.06423	1.05159	1.02693	1.01182	0.98789	0.96393	0.943912	0.931989	0.920369	0.907138	0.899585	0.890035	0.882259	0.875422	0.863974	0.857954	0.856066	0.856569	0.849595	0.845724	0.846972	0.843508	0.839848	0.831906
tir_iaa	1.06645	1.07742	1.09242	1.1025	1.11208	1.13033	1.12865	1.12292	1.1318	1.13473	1.13029	1.12944	1.1164	1.11341	1.10018	1.08242	1.05743	1.04865	1.03266	1.01293	0.996347	0.993015	0.983393	0.976947	0.965733	0.965404	0.957429	0.948884	0.945277	0.936634	0.935364	0.930167	0.921712	0.916854	0.906812	0.900802	0.89288	0.890351	0.882466	0.873799	0.863728
tir_iaa	1.04554	1.05999	1.06922	1.08	1.0838	1.08859	1.06837	1.07112	1.09712	1.10686	1.1091	1.1112	1.11165	1.10793	1.10205	1.0955	1.08261	1.06536	1.04469	1.02872	1.01139	0.993371	0.972138	0.95753	0.945612	0.934039	0.92169	0.912115	0.901782	0.888257	0.883312	0.881719	0.872403	0.861687	0.853209	0.850699	0.846898	0.845906	0.839329	0.834963	0.830283
tir_iaa	0.990346	1.00307	1.01295	1.02404	1.03449	1.03036	1.02867	1.03645	1.03383	1.03972	1.04805	1.04908	1.05196	1.0496	1.0479	1.04269	1.0393	1.02754	1.0179	1.00644	0.98697	0.971631	0.960378	0.943004	0.92566	0.913447	0.899685	0.890013	0.881447	0.873401	0.859767	0.852874	0.846321	0.838099	0.824492	0.822316	0.811493	0.811029	0.800842	0.79589	0.789797
tir_iaa	1.00126	1.0126	1.01385	1.01886	1.01487	1.02175	1.0267	1.03166	1.02223	1.01364	1.00914	1.00442	0.986988	0.971428	0.959096	0.950167	0.927379	0.907557	0.904726	0.892187	0.88931	0.884259	0.881052	0.878049	0.875937	0.876847	0.869455	0.867013	0.863733	0.865016	0.859509	0.855841	0.854315	0.847075	0.850661	0.854293	0.853655	0.849017	0.847917	0.849809	0.845529
tir_iaa	1.00514	1.00373	1.01429	1.01371	1.01787	1.02178	1.03355	1.02942	1.03027	1.03579	1.03243	1.03182	1.03933	1.03975	1.04592	1.04051	1.02994	1.01905	1.00224	0.993477	0.971663	0.954494	0.937232	0.929187	0.921184	0.90463	0.892175	0.879896	0.870772	0.859041	0.856571	0.850008	0.844449	0.84078	0.831203	0.829495	0.827165	0.824387	0.819187	0.812996	0.810358
tir_iaa	0.988529	0.999657	0.999324	1.00962	1.01914	1.01872	1.02027	1.02504	1.02436	1.02058	1.01998	1.01973	1.00926	0.990543	0.978394	0.964882	0.948469	0.932372	0.920033	0.905031	0.883201	0.87263	0.85993	0.85034	0.840177	0.834458	0.829353	0.820849	0.816768	0.812622	0.804292	0.800286	0.799314	0.801978	0.792719	0.790568	0.790827	0.783834	0.782679	0.779812	0.777661

## Sheet: 4d
distance from root tip (µm)	0	20	40	60	80	100	120	140	160	180	200	220	240	260	280	300	320	340	360	380	400	420	440	460	480	500	520	540	560	580	600	620	640	660	680	700	720	740	760	780	800
col_cm	1	1.01211	1.01933	1.02959	1.03683	1.03112	1.02739	1.03978	1.04465	1.04189	1.04381	1.04315	1.04667	1.04462	1.04655	1.05842	1.04254	1.04891	1.05081	1.04369	1.07093	1.0777	1.06953	1.07252	1.05402	1.03721	1.02228	1.01023	0.994567	0.984084	0.968513	0.960458	0.952127	0.936862	0.931737	0.919773	0.909655	0.906037	0.899088	0.894483	0.891266
col_cm	1	1.01892	1.02143	1.01581	1.02474	1.03807	1.03845	1.04108	1.04654	1.04838	1.04836	1.05272	1.0501	1.05099	1.05739	1.04789	1.04427	1.04011	1.0501	1.05333	1.04702	1.0417	1.04006	1.0516	1.05338	1.04312	1.02662	1.02091	1.00669	0.99612	0.983511	0.977908	0.974438	0.96064	0.955803	0.940486	0.937949	0.929862	0.918009	0.912262	0.901557
col_cm	1	0.982356	0.986063	0.985829	0.990693	1.00079	0.994096	0.962288	0.959957	0.978627	0.984117	0.990697	0.989565	0.991363	0.994111	0.99863	1.00448	0.993135	0.988115	0.986418	0.97963	0.975523	0.962794	0.961975	0.950217	0.942522	0.937511	0.923057	0.912256	0.910855	0.902105	0.889585	0.877254	0.876452	0.87613	0.859337	0.859213	0.855674	0.844895	0.841132	0.841979
col_cm	1	1.00605	1.00757	1.01049	1.01904	1.01966	1.02013	1.02246	1.03065	1.04007	1.03609	1.04061	1.0375	1.04345	1.05733	1.0584	1.06012	1.06156	1.0686	1.07948	1.07763	1.07363	1.06734	1.05817	1.0418	1.03623	1.02488	1.0122	1.00133	0.976756	0.96192	0.955684	0.93737	0.924613	0.911982	0.911423	0.910421	0.902362	0.895203	0.892008	0.88751
col_cm	1	0.997034	0.991791	0.996747	1.00627	1.00718	1.00536	1.01196	1.0134	1.01711	1.01354	1.02149	1.01811	1.02411	1.03297	1.04194	1.0426	1.03998	1.03096	1.03024	1.05108	1.04732	1.04504	1.03753	1.02419	1.01369	1.00247	0.982846	0.975485	0.965628	0.953566	0.940632	0.92671	0.92554	0.917534	0.899539	0.895738	0.88318	0.887303	0.887175	0.888609
col_cm	1	1.00303	1.00247	1.00911	1.01671	1.00211	1.00442	1.00837	1.00921	1.00574	1.01419	1.03208	1.04518	1.04903	1.05837	1.06076	1.05669	1.06761	1.06743	1.0564	1.03637	1.01946	1.01076	1.00245	0.975888	0.964205	0.953672	0.935384	0.927543	0.91486	0.909085	0.901693	0.892773	0.883217	0.872006	0.869032	0.860804	0.851861	0.850935	0.840918	0.841582
col_cm	1	0.980496	0.985465	0.976747	0.986639	0.99446	0.985849	0.987082	0.993982	0.998141	1.00373	1.015	1.01823	1.01941	1.02784	1.02544	1.02182	1.01668	1.01294	1.00341	0.995485	0.981779	0.970407	0.959038	0.948881	0.937043	0.92714	0.909212	0.892908	0.888334	0.883785	0.885301	0.875905	0.866707	0.862151	0.862593	0.854974	0.855412	0.852438	0.849034	0.849773
col_cm	1	1.03056	1.02624	1.02524	1.02028	1.01808	1.01276	1.01502	1.01268	1.01288	1.01793	1.02058	1.02843	1.03633	1.04543	1.0473	1.03861	1.03947	1.02744	1.01795	0.996029	0.984402	0.965055	0.949073	0.936505	0.925029	0.908841	0.893717	0.879573	0.870569	0.860775	0.852617	0.854293	0.855608	0.850505	0.851079	0.850219	0.849338	0.850697
col_cm	1	1.01903	1.0213	1.01861	1.02008	1.01301	1.00539	1.01679	1.02336	1.02622	1.02877	1.02953	1.02801	1.02855	1.03044	1.02676	1.02464	1.01962	1.0141	1.00386	0.987557	0.972385	0.94977	0.929519	0.919192	0.896757	0.889499	0.880705	0.865778	0.862937	0.857902	0.855372	0.846751	0.848031	0.846148	0.851115	0.854234	0.851284	0.861229	0.859027	0.867505
col_cm	1	0.972642	0.979976	0.976977	0.976499	0.974878	0.974288	0.970622	0.970511	0.975119	0.983702	0.994061	0.991878	0.994644	0.995984	0.998881	0.992528	0.988027	0.990205	0.987845	0.977421	0.964995	0.957673	0.94166	0.934871	0.926336	0.916642	0.90284	0.89605	0.8935	0.887137	0.875841	0.873646	0.871095	0.8657	0.857646	0.85738	0.858219	0.851381	0.854745	0.840477
col_cm	1	1.00282	1.00289	0.999484	0.994052	0.995533	0.998581	0.99519	0.985592	0.986797	0.985608	0.9746	0.986921	0.993793	0.994164	0.996963	1.00085	1.00604	0.998796	0.988043	0.975996	0.965209	0.940775	0.927523	0.91593	0.905712	0.893083	0.895718	0.888851	0.872833	0.860328	0.85834	0.850829	0.840337	0.836222	0.839345	0.836832	0.838935	0.834053	0.825778	0.820844
col_cm	1	0.986295	0.928612	0.943533	0.981347	0.99062	0.989587	0.991309	0.994094	0.997795	1.0016	1.00107	1.00082	1.01012	1.01928	1.02707	1.0313	1.04463	1.03972	1.02728	1.01892	1.00737	1.00545	0.987194	0.964597	0.953009	0.939815	0.915948	0.901547	0.889226	0.877696	0.869562	0.860536	0.856704	0.844459	0.84626	0.838644	0.835491	0.834238	0.827732	0.833634
col_cm	1	1.00234	1.0065	1.00337	1.00432	1.00746	1.0006	1.01069	1.00716	0.991675	0.998117	0.992036	0.996592	0.99246	0.998712	0.998376	1.00691	0.991777	0.980026	0.975702	0.983034	0.974627	0.96545	0.948757	0.928684	0.921362	0.916863	0.898297	0.888687	0.885813	0.873975	0.874847	0.876495	0.865926	0.862694	0.861923	0.863993	0.860687	0.856566	0.865231	0.861807
col_cm	1	0.991654	0.98326	0.982771	0.977302	0.95982	0.958634	0.960612	0.989012	0.987119	0.991556	0.986193	0.988326	1.00494	1.00038	1.00516	1.00477	1.00355	0.999873	0.994657	0.97789	0.968211	0.954743	0.941168	0.925001	0.911402	0.905804	0.904574	0.895436	0.890676	0.889177	0.877818	0.875037	0.87006	0.865263	0.866031	0.861294	0.860058	0.860386	0.863187	0.861081
col_cm	1	1.00241	1.01141	1.00371	1.00192	1.00555	0.99937	0.997258	0.988287	0.990348	0.991981	0.989271	0.995705	0.998943	1.00156	1.00475	0.995827	0.995999	0.990781	0.994755	0.982399	0.981938	0.97015	0.961663	0.953511	0.941063	0.933598	0.923839	0.908035	0.90426	0.895765	0.887262	0.87995	0.876792	0.867928	0.863014	0.860756	0.858596	0.852675	0.853019	0.848949
col_cm	1	0.999719	1.00145	1.00106	0.997684	0.992861	0.991671	0.991909	0.990547	0.990252	0.988344	0.979032	0.970262	0.958641	0.954334	0.948633	0.94212	0.921403	0.909426	0.897332	0.886381	0.87177	0.863897	0.857104	0.841866	0.84402	0.837346	0.841685	0.83545	0.835009	0.843652	0.839168	0.837179	0.842303	0.844003	0.847817	0.8395	0.83955	0.847202	0.840996
col_cm	1	0.992535	0.99471	0.999586	0.992776	0.99824	1.00161	0.990437	0.994156	1.00242	0.999655	1.00413	1.00963	1.00719	1.00604	1.00689	1.00526	1.00219	0.991335	0.974432	0.962037	0.940327	0.91862	0.91257	0.90813	0.900501	0.900027	0.89394	0.87896	0.876838	0.876418	0.875222	0.871347	0.864662	0.861617	0.852498	0.856833	0.860664	0.857	0.863306	0.869936
col_cm	1	1.01131	1.01868	1.01228	1.01909	1.03456	1.03256	1.03219	1.04288	1.0419	1.04162	1.05327	1.04409	1.0296	1.04289	1.03778	1.02714	1.0405	1.10739	1.11975	1.1055	1.07327	1.0576	1.07221	1.07134	1.06695	1.08009	1.09617	1.06011	1.03335	1.02023	1.0201	1.00476	0.980992	0.969203	0.956328	0.943329	0.929436	0.902454	0.892032	0.89271
col_cm	1	1.01765	1.03268	1.03786	1.03484	1.04132	1.0394	1.05723	1.05218	1.07321	1.08604	1.09324	1.09524	1.10006	1.09773	1.10128	1.09941	1.10424	1.12848	1.12379	1.12111	1.13175	1.13062	1.12272	1.12053	1.12291	1.09921	1.07956	1.05826	1.03412	1.0115	1.00578	0.988983	0.957334	0.945257	0.926708	0.9163	0.914913	0.913069	0.912151	0.906179
col_cm	1	0.94656	0.945305	0.950914	0.963114	0.969079	0.968337	0.964782	0.97671	0.981188	0.990164	0.992141	0.980136	0.986322	0.986663	0.996613	1.01348	1.01929	1.02257	1.02514	1.03732	1.03864	1.04317	1.03221	1.02228	0.996123	0.974186	0.956537	0.944942	0.940496	0.915623	0.895008	0.896408	0.888469	0.872315	0.865062	0.856552	0.852956	0.847225	0.83916	0.832897
col_cm	1	1.03776	1.04384	1.06179	1.07153	1.08075	1.082	1.05916	1.04252	1.07623	1.09064	1.09188	1.10065	1.11138	1.1087	1.11784	1.07881	1.06357	1.09281	1.09854	1.09443	1.08745	1.0698	1.04477	1.02965	1.0114	0.979855	0.96303	0.943909	0.941583	0.931643	0.920931	0.911484	0.891808	0.899365	0.889965	0.877038	0.867412	0.865986	0.863143	0.859309
col_cm	1	0.97716	0.99742	1.00803	1.00811	0.997807	0.992961	0.96522	0.990608	1.01364	1.02655	1.02004	1.03677	1.03982	1.0444	1.04191	1.03574	1.03493	1.04369	1.04828	1.04081	1.04228	1.03403	1.00641	0.997989	0.986784	0.969198	0.957917	0.945591	0.932046	0.917802	0.904463	0.893731	0.876527	0.874575	0.866036	0.853647	0.843117	0.835118	0.825465	0.833811
col_cm	1	0.990145	1.00178	1.0038	1.00832	1.01518	1.03749	1.04904	1.04215	1.04216	1.03655	1.02293	1.00389	0.979674	0.984988	1.00728	1.02432	1.02613	1.06054	1.06178	1.07051	1.06772	1.06536	1.05347	1.03079	1.02816	1.01318	0.998655	0.992431	0.979582	0.95916	0.943064	0.939617	0.927777	0.915801	0.899542	0.892179	0.883178	0.882826	0.880113	0.861578
col_cm	1	1.01972	1.02277	1.02775	1.03603	1.03795	1.03969	1.04318	1.06056	1.06862	1.06111	1.06594	1.06878	1.08152	1.07986	1.0827	1.10253	1.10872	1.12632	1.14032	1.16048	1.17103	1.1661	1.16539	1.14905	1.12401	1.11896	1.10451	1.08139	1.05169	1.04912	1.02249	1.00051	0.990031	0.975661	0.963025	0.957119	0.947147	0.937904	0.935942	0.930698
col_cm	1	0.999688	1.00889	1.01973	1.03083	1.0326	1.03756	1.04312	1.04893	1.06216	1.05552	1.06243	1.06767	1.01465	0.947222	0.987297	1.03327	1.08098	1.10919	1.11418	1.11486	1.11459	1.09524	1.07587	1.06804	1.06338	1.04777	1.0362	1.02073	0.991824	0.979218	0.958509	0.946172	0.931607	0.92176	0.910812	0.889822	0.884288	0.858505	0.850862	0.852459
col_iaa	1.06285	1.06065	1.06109	1.07139	1.0767	1.09138	1.09608	1.10658	1.11182	1.11313	1.12414	1.14101	1.14955	1.15767	1.16681	1.16328	1.15402	1.14409	1.14741	1.14645	1.12336	1.10958	1.11115	1.1031	1.07612	1.06281	1.05229	1.04624	1.03101	1.02363	1.02351	1.02109	1.01802	1.0058	0.998976	0.992618	0.999707	0.995051	0.981563	0.9865	0.980629
col_iaa	1.03816	1.04216	1.04767	1.05542	1.05786	1.07392	1.0663	1.0583	1.06885	1.08452	1.08978	1.09833	1.11474	1.12998	1.1407	1.15425	1.15636	1.16492	1.15596	1.1656	1.15768	1.15813	1.14272	1.13527	1.11637	1.10521	1.09449	1.08284	1.07358	1.06839	1.05177	1.04138	1.03466	1.04363	1.03403	1.02099	1.01862	1.01432	1.00424	0.999507	1.0024
col_iaa	1.02824	1.03388	1.03761	1.04189	1.05408	1.06106	1.06411	1.06744	1.07655	1.08073	1.07702	1.09663	1.10826	1.12866	1.12824	1.13473	1.13695	1.14131	1.16566	1.16999	1.17291	1.16079	1.14488	1.13816	1.13067	1.1121	1.10244	1.09958	1.08847	1.07302	1.0611	1.05411	1.04375	1.04514	1.03481	1.02296	1.01072	1.00251	1.00009	0.995592	0.995094
col_iaa	1.03954	1.03826	1.04052	1.04685	1.05107	1.05913	1.0519	1.06627	1.05482	1.05617	1.07396	1.08723	1.04958	1.08145	1.09828	1.11323	1.12116	1.13752	1.14841	1.15358	1.15166	1.14303	1.13794	1.12571	1.10556	1.10317	1.09347	1.07461	1.06238	1.05675	1.04589	1.03972	1.04445	1.03673	1.03305	1.02462	1.02624	1.02079	1.01551	1.0112	1.0083
col_iaa	1.03139	1.04149	1.04858	1.05926	1.06585	1.06353	1.0684	1.07465	1.08139	1.0822	1.09275	1.1055	1.12157	1.12536	1.13774	1.14458	1.15133	1.15245	1.15621	1.16582	1.15413	1.12775	1.13866	1.13503	1.12471	1.103	1.0989	1.07984	1.06635	1.05696	1.05818	1.05212	1.04953	1.03778	1.02681	1.01898	1.01251	1.01128	1.01207	1.00755	0.997162
col_iaa	1.02085	1.01391	1.00491	1.00768	1.01757	1.01936	1.046	1.04894	1.05668	1.05476	1.06142	1.07306	1.05954	1.04206	1.09302	1.10364	1.10973	1.11699	1.11717	1.1185	1.12738	1.13021	1.12347	1.11737	1.11378	1.09695	1.10166	1.09195	1.08425	1.0746	1.06396	1.06018	1.0651	1.05979	1.04477	1.04434	1.03799	1.03398	1.03375	1.03316	1.03518
col_iaa	1.04034	1.03566	1.0331	1.02816	1.05212	1.04941	1.05341	1.06768	1.06807	1.0716	1.07035	1.0648	1.07245	1.07244	1.09421	1.0892	1.10377	1.10785	1.11645	1.12313	1.12382	1.12543	1.11328	1.10134	1.09285	1.09542	1.09352	1.08494	1.07329	1.07357	1.06815	1.06012	1.05484	1.04016	1.04814	1.03877	1.02293	1.02071	1.01736	1.0075	0.992101
col_iaa	1.12336	1.13497	1.1475	1.13161	1.13858	1.15074	1.14999	1.14857	1.16124	1.16757	1.15905	1.1744	1.17905	1.18094	1.19804	1.19769	1.19605	1.18869	1.16664	1.14572	1.13958	1.12227	1.10703	1.08756	1.06779	1.05099	1.03047	1.01481	1.01341	1.0054	0.996383	0.992251	0.983307	0.982161	0.972378	0.977214	0.97174	0.96799	0.978334	0.974624	0.973202
col_iaa	1.093	1.09674	1.07399	1.07686	1.10169	1.11302	1.11228	1.1127	1.09521	1.10839	1.12156	1.12557	1.13387	1.11501	1.12579	1.15289	1.15178	1.15808	1.15403	1.14268	1.12862	1.09478	1.07607	1.02974	1.02983	1.02392	1.01557	0.996748	0.97004	0.973939	0.972037	0.954687	0.952181	0.941781	0.929271	0.933888	0.928361	0.920621	0.906646	0.917949	0.920902
col_iaa	1.11232	1.10148	1.10969	1.1001	1.09678	1.10304	1.06681	1.03468	1.03709	1.07859	1.10733	1.1439	1.1548	1.16456	1.17685	1.18402	1.19577	1.20289	1.21266	1.2104	1.2069	1.17883	1.15603	1.1368	1.12726	1.10014	1.07492	1.04967	1.04069	1.03667	1.01594	0.994368	0.98072	0.97057	0.959704	0.953004	0.950965	0.939534	0.927517	0.919775	0.908663
col_iaa	1.10188	1.10193	1.10445	1.10887	1.11624	1.11995	1.1184	1.11065	1.11734	1.10322	1.11156	1.1128	1.10548	1.12624	1.14989	1.15522	1.14908	1.13156	1.14436	1.1686	1.16502	1.15657	1.14325	1.13782	1.11773	1.10996	1.09629	1.08718	1.07966	1.06305	1.04247	1.04051	1.03153	1.02346	1.01129	1.00916	0.998968	0.983614	0.974304	0.964962	0.957396
col_iaa	1.12218	1.12744	1.13361	1.13541	1.15753	1.15275	1.15538	1.15742	1.15983	1.17001	1.17127	1.1714	1.16817	1.1792	1.18691	1.1948	1.20036	1.20817	1.20122	1.20348	1.2124	1.20197	1.2036	1.18229	1.16762	1.14831	1.13248	1.10635	1.08915	1.07038	1.04065	1.01842	1.00554	0.986729	0.968257	0.972286	0.951824	0.939837	0.933099	0.927268	0.922451
col_iaa	1.10775	1.1081	1.11111	1.11287	1.10246	1.11698	1.11076	1.12901	1.13044	1.13063	1.13486	1.13542	1.12904	1.12102	1.11036	1.14983	1.16041	1.16572	1.16966	1.16364	1.16857	1.16802	1.17006	1.15503	1.13159	1.11304	1.10284	1.08617	1.0744	1.06072	1.05362	1.04	1.02436	1.01517	1.00361	1.00018	0.982317	0.97593	0.966173	0.952738	0.925015
col_iaa	1.10705	1.1083	1.11478	1.11269	1.11334	1.13379	1.14085	1.14712	1.14129	1.1337	1.1373	1.13763	1.13918	1.13706	1.14759	1.15737	1.16481	1.16686	1.16948	1.17234	1.16972	1.14626	1.12841	1.11536	1.09299	1.08436	1.08177	1.06529	1.04881	1.02778	1.0142	1.00197	0.99381	0.978351	0.957238	0.943911	0.945006	0.93846	0.935773	0.919063	0.912595
col_iaa	1.09545	1.09693	1.11279	1.12251	1.09493	1.09394	1.10196	1.10494	1.11034	1.12278	1.13999	1.13626	1.14978	1.16627	1.15552	1.16456	1.15932	1.13107	1.12591	1.13308	1.11554	1.09	1.0612	1.03824	1.02061	0.998935	0.975735	0.952279	0.948609	0.933565	0.924266	0.907554	0.903984	0.888049	0.890833	0.877658	0.880965	0.87871	0.865756	0.873867	0.863274
col_iaa	0.999076	1.03306	1.05608	1.06451	1.06135	1.07424	1.08903	1.09626	1.09948	1.10577	1.11232	1.12104	1.13385	1.08187	1.04683	1.07351	1.06841	1.18156	1.21178	1.21402	1.22348	1.21302	1.22272	1.2166	1.21284	1.19476	1.16468	1.14705	1.12452	1.1056	1.08614	1.05829	1.04723	1.0321	1.0096	1.00292	0.989306	0.992544	0.988633	0.971616	0.967639
col_iaa	1.0386	1.04838	1.06309	1.05778	1.06056	1.07302	1.07499	1.08064	1.08865	1.09054	1.10516	1.11493	1.11933	1.13166	1.12988	1.12988	1.12838	1.09703	1.14012	1.17458	1.15094	1.15853	1.17752	1.1481	1.15129	1.11713	1.0921	1.08471	1.06975	1.05863	1.05427	1.04454	1.0217	1.01054	1.00546	0.995924	0.980773	0.973765	0.975261	0.966983	0.95762
col_iaa	1.06474	1.06315	1.06759	1.04808	1.06907	1.06705	1.10799	1.10984	1.1283	1.13265	1.14078	1.15251	1.16327	1.171	1.19079	1.21237	1.24294	1.26705	1.27324	1.27375	1.28187	1.27311	1.25603	1.24079	1.23204	1.20867	1.16813	1.18447	1.17267	1.14242	1.12032	1.10465	1.08516	1.06444	1.04951	1.03609	1.02107	1.02717	1.01429	1.00214	0.987563
col_iaa	1.08261	1.08288	1.08606	1.1068	1.11965	1.11757	1.12733	1.13381	1.13832	1.14579	1.1586	1.16747	1.15698	1.17979	1.19626	1.21544	1.23106	1.23313	1.25375	1.24816	1.243	1.26124	1.28764	1.29051	1.2688	1.25917	1.24102	1.21487	1.17998	1.15108	1.12138	1.10701	1.0838	1.07472	1.06105	1.04892	1.02308	0.992164	0.979712	0.96901	0.96163
col_iaa	1.03529	1.04155	1.05285	1.05214	1.04708	1.07215	1.07388	1.06858	1.07723	1.07473	1.06344	1.04994	1.06253	1.08527	1.09953	1.11795	1.14997	1.16847	1.18997	1.19819	1.2009	1.1865	1.14567	1.12497	1.11743	1.09824	1.07978	1.07126	1.06362	1.05917	1.05826	1.0434	1.03936	1.04402	1.02568	1.01116	0.995096	0.977814	0.973562	0.968174	0.96727
col_iaa	1.08916	1.09364	1.10019	1.09583	1.09447	1.11357	1.11916	1.1182	1.14648	1.15648	1.14817	1.15924	1.17183	1.17831	1.19282	1.2255	1.26388	1.2668	1.27035	1.28809	1.29088	1.23048	1.23492	1.27061	1.26646	1.24599	1.21503	1.21873	1.19929	1.16685	1.13408	1.11271	1.09253	1.0698	1.05066	1.02709	1.02686	1.03142	1.0056	0.984523	0.964785
col_iaa	1.02735	1.06234	1.07809	1.08267	1.0836	1.08833	1.09258	1.09011	1.10187	1.11524	1.11909	1.13027	1.15559	1.1815	1.1842	1.20202	1.18704	1.20399	1.20904	1.22395	1.21324	1.22426	1.22365	1.19351	1.17082	1.17237	1.15388	1.16246	1.164	1.16243	1.16729	1.15609	1.14008	1.13702	1.12651	1.10837	1.10439	1.10642	1.10081	1.08278	1.07407
col_iaa	1.09934	1.0823	1.08774	1.09674	1.09268	1.11063	1.0837	1.13712	1.14958	1.16054	1.17036	1.17321	1.19127	1.18953	1.20127	1.21716	1.22917	1.23546	1.24945	1.26847	1.26306	1.28656	1.2947	1.26849	1.26564	1.26571	1.26254	1.23999	1.22038	1.21227	1.19565	1.18402	1.15316	1.1255	1.11463	1.11082	1.09366	1.06975	1.06518	1.0687	1.06363
afb1_cm	0.967231	0.972759	0.971801	0.972898	0.973956	0.967803	0.967808	0.956362	0.958463	0.961239	0.959814	0.962378	0.962684	0.967663	0.967224	0.970561	0.966715	0.958352	0.956425	0.946509	0.918133	0.936403	0.938494	0.931407	0.921517	0.91592	0.911505	0.913346	0.904747	0.894774	0.890365	0.886819	0.872526	0.873378	0.862818	0.861465	0.858449	0.846228	0.849054	0.849928	0.848067
afb1_cm	0.917317	0.919011	0.919183	0.918322	0.921367	0.922757	0.927839	0.920535	0.920216	0.912934	0.913276	0.910012	0.912329	0.912769	0.913543	0.916967	0.915226	0.917864	0.92064	0.919342	0.918064	0.90923	0.902031	0.901956	0.894832	0.891762	0.888636	0.884625	0.866324	0.85194	0.852718	0.8439	0.842482	0.82821	0.827319	0.823193	0.826458	0.82231	0.819231	0.818932	0.816654
afb1_cm	0.932784	0.934797	0.942211	0.937497	0.937244	0.928731	0.933293	0.930355	0.92674	0.922553	0.920803	0.91509	0.886235	0.898554	0.9155	0.921962	0.916797	0.904213	0.898004	0.899316	0.899227	0.891394	0.884747	0.881195	0.877304	0.862285	0.856943	0.858857	0.849429	0.848866	0.839924	0.8358	0.83229	0.829469	0.820584	0.824974	0.824265	0.815007	0.812286	0.809734	0.807414
afb1_cm	0.946427	0.951574	0.940255	0.946092	0.955026	0.946914	0.943887	0.945258	0.947298	0.941391	0.94793	0.939365	0.926706	0.925892	0.923505	0.927331	0.934667	0.939495	0.945375	0.934873	0.924353	0.925381	0.916134	0.91388	0.905306	0.897096	0.895595	0.881684	0.877467	0.866685	0.864254	0.860689	0.856891	0.853447	0.849235	0.846962	0.838684	0.835281	0.835333	0.839187	0.831366
afb1_cm	0.948419	0.952495	0.951773	0.947191	0.950326	0.943417	0.929202	0.923322	0.927302	0.940509	0.928391	0.931888	0.950201	0.948103	0.950862	0.954543	0.952823	0.948488	0.94088	0.930872	0.929736	0.922469	0.914405	0.910994	0.901155	0.890861	0.888283	0.879097	0.870759	0.872422	0.86483	0.853026	0.853138	0.856526	0.852359	0.850378	0.852142	0.845636	0.843037	0.845119	0.838688
afb1_cm	0.951237	0.95589	0.945861	0.953358	0.942994	0.938818	0.947932	0.952124	0.959196	0.967674	0.972045	0.973857	0.972371	0.977995	0.977249	0.968616	0.965197	0.967008	0.960028	0.950209	0.930962	0.925232	0.919024	0.912443	0.901868	0.899709	0.888955	0.878794	0.876996	0.872631	0.870298	0.866782	0.862047	0.861217	0.855336	0.865129	0.856159	0.856819	0.854996	0.842395	0.846257
afb1_cm	0.987995	0.991004	0.98751	0.987564	0.979826	0.979433	0.967466	0.960667	0.952392	0.945515	0.948722	0.955113	0.96167	0.960055	0.968439	0.957526	0.957171	0.949677	0.934742	0.924902	0.911159	0.898428	0.894507	0.889757	0.878189	0.869165	0.867178	0.866103	0.864355	0.857733	0.849293	0.846005	0.843704	0.846807	0.84289	0.840663	0.836833	0.833771	0.834872	0.834326	0.832853
afb1_cm	0.985316	0.93713	0.971829	0.978256	0.98108	0.980661	0.977373	0.97913	0.976849	0.979455	0.979014	0.981967	0.992361	0.989638	0.986587	0.979744	0.966599	0.959285	0.953101	0.942329	0.931494	0.928142	0.913287	0.903002	0.895642	0.889935	0.881459	0.883459	0.869006	0.86783	0.853683	0.850839	0.847511	0.842291	0.837273	0.846051	0.841934	0.848898	0.84839	0.845168	0.85302
afb1_cm	0.96951	0.973933	0.972264	0.969267	0.969471	0.96603	0.967005	0.958849	0.952446	0.971153	0.976548	0.97644	0.981722	0.975246	0.97528	0.961906	0.961867	0.949804	0.935374	0.921219	0.914458	0.90317	0.892252	0.879525	0.867127	0.857696	0.848079	0.837401	0.831556	0.827566	0.826473	0.825688	0.822765	0.826723	0.831767	0.828332	0.824669	0.829719	0.83134	0.830217	0.823422
afb1_cm	0.964413	0.959559	0.958572	0.952976	0.952345	0.951467	0.954954	0.964707	0.963624	0.956695	0.964928	0.97003	0.97601	0.980211	0.98128	0.978621	0.978809	0.981781	0.976108	0.96428	0.954516	0.952676	0.945048	0.937946	0.928154	0.919775	0.911255	0.893239	0.888906	0.884133	0.873969	0.864373	0.855557	0.854815	0.859623	0.847109	0.847826	0.844158	0.846831	0.848643	0.847627
afb1_cm	0.979182	0.989281	0.991686	0.986149	0.982836	0.975694	0.967405	0.970997	0.959944	0.95299	0.95564	0.952402	0.962346	0.962703	0.963269	0.96508	0.969305	0.97009	0.961018	0.954472	0.951205	0.963367	0.958726	0.951689	0.948134	0.942312	0.931749	0.908721	0.903344	0.904945	0.900378	0.893919	0.887509	0.886245	0.883895	0.880478	0.876386	0.867827	0.867803	0.86833	0.858445
afb1_cm	0.98611	0.978681	0.977031	0.979566	0.982679	0.979017	0.976228	0.981215	0.977286	0.969058	0.95805	0.93716	0.969141	0.974909	0.970845	0.971365	0.967682	0.967425	0.962262	0.961592	0.964815	0.958856	0.947901	0.941263	0.925533	0.920465	0.908467	0.890709	0.892377	0.88904	0.880588	0.873572	0.873062	0.873423	0.868279	0.859766	0.854299	0.854312	0.848162	0.846957	0.845241
afb1_cm	0.964538	0.976028	0.972506	0.970809	0.970969	0.969975	0.967817	0.951597	0.955174	0.9501	0.942806	0.972137	0.966211	0.966619	0.972958	0.969891	0.968901	0.964086	0.962119	0.960633	0.952925	0.949162	0.945435	0.935414	0.927835	0.921207	0.908689	0.903162	0.895339	0.888349	0.881345	0.871962	0.865749	0.86013	0.85475	0.852303	0.853863	0.845319	0.842417	0.841574	0.843309
afb1_cm	0.956136	0.957381	0.960988	0.959433	0.956746	0.947232	0.951578	0.948801	0.940659	0.957077	0.957223	0.950682	0.951062	0.96129	0.968355	0.963824	0.958215	0.95782	0.958887	0.952046	0.952889	0.947996	0.934678	0.919272	0.913677	0.900167	0.890513	0.891185	0.881723	0.877017	0.868648	0.861319	0.852798	0.844114	0.841645	0.847677	0.840256	0.833098	0.828116	0.829932	0.82949
afb1_cm	0.982498	0.983194	0.978937	0.969316	0.970041	0.956109	0.955326	0.956399	0.949124	0.946738	0.928121	0.935702	0.929647	0.934966	0.92993	0.930752	0.925221	0.932953	0.932211	0.928967	0.924676	0.922129	0.920516	0.912031	0.905929	0.900213	0.894379	0.891822	0.882873	0.868355	0.860219	0.857798	0.853596	0.841603	0.843857	0.836049	0.832674	0.833335	0.840384	0.842304	0.841133
afb1_cm	0.985972	0.978663	0.973063	0.982467	0.989862	0.981576	0.985252	0.986532	0.987617	0.981032	0.979416	0.979887	0.972029	0.967036	0.965496	0.969086	0.969402	0.976094	0.96992	0.959892	0.96362	0.954201	0.94579	0.934818	0.928405	0.914299	0.907012	0.886248	0.866169	0.86513	0.864161	0.849731	0.835246	0.834427	0.822739	0.827244	0.819655	0.813411	0.806946	0.805528	0.804815
afb1_cm	0.990375	0.985927	0.992851	1.00137	1.01322	1.0105	1.00485	1.00906	1.00421	0.999104	0.994833	1.00221	0.998114	0.995975	0.9985	1.00322	1.00698	0.998947	0.997873	0.994936	0.99133	0.981959	0.945633	0.95969	0.974707	0.967114	0.962642	0.95537	0.944781	0.927854	0.911327	0.905724	0.897358	0.884097	0.874334	0.864794	0.853588	0.850899	0.83285	0.832382	0.836357
afb1_cm	0.984478	0.984087	0.989754	0.985459	0.981373	0.988161	0.988769	0.996585	1.00307	1.00365	1.01409	1.01156	1.01421	1.01286	1.02002	1.02534	1.02149	1.01975	1.01683	1.00948	1.00941	1.00935	1.00478	0.991366	0.988586	0.975624	0.959832	0.957188	0.951808	0.93652	0.930204	0.91675	0.900542	0.884813	0.873826	0.853175	0.844366	0.850382	0.847886	0.842651	0.844683
afb1_cm	0.984492	0.99019	0.986266	0.988686	0.987461	0.988554	0.992457	1.00035	0.997625	0.991842	0.986706	0.993213	0.981645	0.991868	0.997717	1.0035	1.00677	1.00368	0.994846	0.985475	0.976929	0.97968	0.978667	0.96742	0.962808	0.953033	0.957602	0.937731	0.928242	0.913251	0.911958	0.904244	0.887955	0.878848	0.858859	0.849943	0.854808	0.839763	0.837475	0.824647	0.82265
afb1_cm	0.94682	0.964057	0.968792	0.972938	0.970903	0.964166	0.957772	0.965341	0.959011	0.952187	0.965165	0.950204	0.942858	0.945311	0.937868	0.921261	0.941127	0.951216	0.942624	0.96202	0.964079	0.960473	0.95263	0.946566	0.943386	0.941887	0.940539	0.922638	0.904585	0.917015	0.902811	0.89127	0.882022	0.871454	0.861564	0.855666	0.844618	0.83502	0.838408	0.838617	0.825298
afb1_iaa	0.987364	0.990097	0.981532	0.997409	0.997915	0.991018	0.985835	0.986423	0.996449	0.996213	0.988536	0.996626	0.991505	1.00908	1.015	1.01475	1.01531	1.0201	1.01975	1.01715	1.00727	1.01053	1.02446	1.02643	1.01842	1.01242	1.00367	0.997153	1.00311	1.0027	0.998496	0.993797	0.988872	0.971254	0.969386	0.970793	0.960727	0.953835	0.954962	0.952089	0.945306
afb1_iaa	0.960309	0.960875	0.960192	0.969506	0.971695	0.967651	0.971749	0.974873	0.979778	0.975163	0.986886	0.992476	0.997296	0.992327	0.991813	0.992797	0.980964	0.968836	0.957518	0.963709	0.958145	0.95731	0.957696	0.94732	0.94606	0.939285	0.93376	0.925356	0.925129	0.921124	0.913595	0.905116	0.897436	0.894163	0.896881	0.894601	0.896501	0.892188	0.895723	0.896426	0.899741
afb1_iaa	1.01084	1.00791	1.02013	1.02313	1.01792	1.01612	1.0137	1.02074	1.02232	1.01995	1.02272	1.01812	1.01353	1.03005	1.0363	1.03997	1.03133	1.03022	1.02346	1.02371	1.01809	1.01727	1.01475	1.00131	0.995935	0.986318	0.977538	0.973739	0.962121	0.960242	0.967764	0.953109	0.942714	0.941643	0.938871	0.932449	0.924321	0.914757	0.914978	0.907822	0.904709
afb1_iaa	0.978287	0.982378	0.981357	0.978786	0.975652	0.965777	0.966838	0.982698	0.982204	0.984606	0.985254	0.991998	0.999	0.997514	1.0018	0.997432	1.00253	1.01601	1.02217	1.01266	1.02292	1.02544	1.01887	1.01226	1.00232	0.996394	1.00808	1.00681	1.00464	1.00187	0.995913	0.995456	0.99171	0.989937	0.984559	0.984684	0.986218	0.974013	0.963142	0.967163	0.961854
afb1_iaa	0.984401	0.997207	1.00263	1.00242	1.00403	1.02071	1.01935	1.02564	1.01849	1.02211	1.02162	1.01555	1.0254	1.0375	1.04091	1.03775	1.03727	1.03142	1.02301	1.01676	1.02092	1.01666	0.998223	0.992955	0.983738	0.988844	0.994277	0.97134	0.964008	0.959017	0.951496	0.950116	0.946013	0.948847	0.943265	0.941523	0.934962	0.927975	0.925619	0.922675	0.926174
afb1_iaa	1.01619	1.02666	1.02894	1.03999	1.04037	1.04969	1.02477	1.00075	1.05332	1.06658	1.0727	1.06378	1.0747	1.07362	1.0705	1.06483	1.0452	1.03851	1.03326	1.0257	1.00762	0.992426	0.988706	0.988532	0.980123	0.973856	0.966444	0.959605	0.952763	0.94803	0.938607	0.947872	0.947421	0.940816	0.941907	0.933407	0.930223	0.934077	0.923536	0.920978	0.921172
afb1_iaa	1.07053	1.06967	1.07423	1.06787	1.06533	1.06586	1.0623	1.05943	1.05669	1.06769	1.06189	1.06469	1.06802	1.07026	1.07779	1.08123	1.07827	1.08039	1.07422	1.06967	1.05009	1.0417	1.03421	1.01844	1.02769	1.02141	1.0086	0.997811	0.984502	0.979158	0.965876	0.959323	0.949278	0.936974	0.937366	0.939546	0.927605	0.925668	0.925649	0.919182	0.926785
afb1_iaa	1.10517	1.11188	1.10956	1.11555	1.10723	1.10432	1.10701	1.10475	1.11164	1.11251	1.11602	1.11185	1.09606	1.0962	1.09934	1.09029	1.08836	1.0662	1.07769	1.07219	1.07117	1.07145	1.06763	1.06965	1.05794	1.04668	1.02608	1.02284	1.01898	1.00641	0.992185	0.984597	0.972633	0.956581	0.943778	0.933194	0.928355	0.934562	0.929559	0.933086	0.943035
afb1_iaa	1.0598	1.05263	1.07045	1.07764	1.07146	1.07048	1.06264	1.06407	1.06642	1.06479	1.07313	1.07837	1.07028	1.07646	1.07292	1.05784	1.06434	1.08522	1.09999	1.09665	1.09998	1.09632	1.09435	1.09066	1.07903	1.07257	1.06822	1.06486	1.04792	1.03512	1.02692	1.01594	1.01607	1.01953	1.01634	1.00366	1.00266	0.994356	0.979797	0.98377	0.973454
afb1_iaa	1.06211	1.05974	1.06976	1.06536	1.06439	1.06366	1.05882	1.06261	1.06143	1.06417	1.07394	1.07104	1.07211	1.07432	1.06585	1.06971	1.08139	1.07143	1.06574	1.05506	1.06384	1.0702	1.05736	1.05418	1.04245	1.03542	1.03026	1.03051	1.02416	1.02269	1.00621	0.996177	0.986627	0.985169	0.983427	0.973799	0.962468	0.947543	0.946373	0.935061	0.93537
afb1_iaa	1.07071	1.06344	1.07328	1.0717	1.07248	1.08134	1.06558	1.05863	1.0656	1.07352	1.08329	1.08026	1.08157	1.08617	1.091	1.09765	1.10392	1.10518	1.10406	1.09745	1.10725	1.09741	1.09741	1.09842	1.09773	1.0791	1.07898	1.08507	1.08063	1.06944	1.03592	1.04507	1.05616	1.05043	1.0325	1.02766	1.03108	1.02475	1.01363	1.00456	1.00114
afb1_iaa	1.00496	1.00563	1.00438	0.993193	1.00054	1.01798	1.03353	1.03392	1.03636	1.02815	1.0299	1.01857	1.02458	1.03496	1.03637	1.04263	1.05804	1.07554	1.07621	1.07581	1.06913	1.08153	1.07608	1.08262	1.08791	1.08724	1.08006	1.06027	1.05398	1.04817	1.03393	1.0196	1.01275	1.00115	0.993198	0.981534	0.980829	0.969662	0.97337	0.967775	0.956273
afb1_iaa	1.01868	1.02622	1.03943	1.02145	1.03286	1.05287	1.04556	1.04841	1.06798	1.08263	1.08713	1.09701	1.11033	1.12048	1.11622	1.11716	1.12515	1.11697	1.10853	1.10836	1.12555	1.11477	1.09558	1.10595	1.09101	1.09124	1.08973	1.09034	1.08209	1.07702	1.07318	1.06151	1.04071	1.05066	1.04555	1.0259	1.01705	1.00429	0.999173	0.985462	0.985324
afb1_iaa	1.0023	1.00343	1.00449	1.01701	1.01666	1.01298	1.01261	1.02273	1.02426	1.01582	1.02253	1.01904	1.02347	1.0287	1.02763	1.02374	1.03428	1.04313	1.04883	1.04874	1.04381	1.04945	1.03846	1.04289	1.04988	1.05242	1.04754	1.03032	1.02613	1.0228	1.019	1.00143	0.98524	0.98611	0.987378	0.983357	0.962722	0.951752	0.937559	0.932825	0.914895
afb1_iaa	0.997889	0.997553	1.00511	1.00266	0.986403	0.986967	0.99586	0.989479	1.00974	1.02495	1.02352	1.04782	1.04363	1.03528	1.0399	1.04034	1.04609	1.065	1.05996	1.06071	1.06554	1.06605	1.07595	1.07703	1.06193	1.05367	1.04653	1.036	1.02044	1.00826	1.01736	1.00184	0.982064	0.97335	0.966415	0.946409	0.929501	0.929963	0.924406	0.927002	0.918844
afb1_iaa	0.978496	0.985767	0.986558	0.988533	0.993327	0.994238	0.992536	0.978075	0.980755	0.974845	0.990691	0.992807	1.00076	1.00787	1.00834	1.01127	1.01328	1.01881	1.01614	1.01244	1.00539	0.99543	1.0085	1.00129	0.995706	0.985432	0.977446	0.986922	0.986211	0.983037	0.973525	0.956333	0.944933	0.93379	0.924532	0.920946	0.910929	0.912873	0.904851	0.851379	0.817081
afb1_iaa	0.999187	1.00308	1.01444	1.01392	1.01507	1.03055	1.03227	1.02732	1.03522	1.03891	1.04675	1.05828	1.04942	1.05681	1.06106	1.06952	1.07101	1.07303	1.07005	1.07352	1.0601	1.06257	1.05362	1.03135	1.03422	1.0318	1.0208	1.01873	1.00251	0.990835	0.983553	0.958869	0.949855	0.94041	0.947351	0.950821	0.958255	0.943678	0.928662	0.925864	0.928596
afb1_iaa	1.01594	1.02101	1.01831	1.02776	1.0225	1.02249	1.03224	1.02475	1.03403	1.05396	1.04482	1.03156	1.03205	1.03613	1.05018	1.05362	1.05401	1.05396	1.05302	1.05387	1.053	1.03939	1.02691	1.0234	1.0215	1.00634	1.0003	0.996995	0.989426	0.977393	0.979189	0.97131	0.965109	0.957975	0.945602	0.932617	0.925773	0.915113	0.92643	0.910774	0.906378
afb1_iaa	1.00035	1.01158	1.01714	1.01358	1.00178	0.992237	0.982885	0.997647	1.01744	1.01431	1.01131	1.02733	1.03895	1.04253	1.04024	1.04277	1.04511	1.04088	1.04845	1.05921	1.06651	1.07323	1.06308	1.05269	1.06476	1.06295	1.0512	1.02415	0.983885	1.00262	1.00475	1.0074	0.997178	0.999135	1.00062	0.992102	0.982074	0.973753	0.959015	0.951829	0.946859
afb1ox_cm	0.980671	0.976972	0.986007	0.988292	0.990779	0.992216	0.992626	0.994629	0.991107	0.987517	0.986533	0.979813	0.977639	0.992072	1.00558	1.015	1.01764	1.01852	1.01856	1.01701	1.00209	0.989856	0.975883	0.976893	0.963994	0.95188	0.946307	0.936002	0.923138	0.920815	0.913774	0.897179	0.888043	0.885507	0.875982	0.869888	0.872486	0.86407	0.85722	0.852097	0.84978
afb1ox_cm	1.00207	1.00493	1.02393	1.02813	1.03519	1.03945	1.04814	1.05904	1.0772	1.0738	1.08302	1.09372	1.08267	1.06958	1.05344	1.04801	1.02426	1.00341	0.980304	0.956487	0.938625	0.917165	0.901286	0.890766	0.886113	0.870818	0.869361	0.855765	0.856473	0.859856	0.855824	0.853481	0.863184	0.854322	0.848072	0.854577	0.856201	0.856337	0.85952	0.867191	0.862814
afb1ox_cm	0.997619	1.00381	1.00656	1.01407	1.01592	1.02454	1.02685	1.02085	1.03241	1.03114	1.03687	1.04115	1.05525	1.0661	1.07225	1.07989	1.08647	1.10093	1.09676	1.09415	1.07891	1.07135	1.05403	1.02592	1.00357	0.990777	0.976823	0.967218	0.949429	0.925388	0.91438	0.901296	0.892525	0.880224	0.877772	0.869713	0.856246	0.855249	0.848091	0.849293	0.843538
afb1ox_cm	0.983998	0.988656	0.988912	0.999989	1.00449	1.00962	1.01348	1.01247	1.01702	1.01177	1.00343	1.00996	1.01053	1.00528	0.999193	1.00288	0.998095	0.981297	0.969091	0.96019	0.942777	0.932913	0.917324	0.905259	0.882011	0.871949	0.871536	0.84779	0.839443	0.836841	0.824405	0.821606	0.821911	0.809989	0.808821	0.806167	0.807508
afb1ox_cm	0.990985	0.997964	1.00345	0.997872	1.01141	1.0165	1.01964	1.01927	1.02218	1.01855	1.01311	1.02622	1.02829	1.03377	1.04492	1.04767	1.0449	1.04774	1.05206	1.05758	1.06334	1.04727	1.0434	1.03935	1.02331	1.00801	0.993538	0.9769	0.960286	0.943089	0.933145	0.925405	0.919407	0.909998	0.89318	0.882293	0.871844	0.860078	0.855557	0.869749	0.867973
afb1ox_cm	1.0681	1.08316	1.07563	1.07981	1.08554	1.08299	1.07693	1.08592	1.09561	1.09604	1.09556	1.09735	1.09758	1.10652	1.11266	1.12256	1.12615	1.1338	1.14642	1.15901	1.15799	1.1605	1.15216	1.14882	1.13835	1.12371	1.11724	1.09791	1.07842	1.06608	1.06089	1.04437	1.02166	1.01081	0.992815	0.987227	0.969855	0.962439	0.949585	0.945189	0.943335
afb1ox_cm	1.07764	1.08276	1.08383	1.08663	1.09517	1.10153	1.0985	1.11922	1.11952	1.11636	1.11537	1.12258	1.11932	1.12814	1.1463	1.15676	1.16813	1.17266	1.171	1.15626	1.15986	1.1551	1.14478	1.13951	1.12219	1.09885	1.08326	1.06291	1.04707	1.0317	1.01608	1.01006	1.00047	0.978678	0.970797	0.958078	0.951296	0.94412	0.935605	0.932954	0.929597
afb1ox_cm	1.00937	1.01381	1.02085	1.01379	1.01234	1.01747	1.01843	1.01914	1.03033	1.03503	1.03951	1.0494	1.04126	1.04698	1.05848	1.05629	1.06156	1.05872	1.05133	1.04778	1.02723	1.01841	1.01319	1.00639	1.0005	0.994234	0.981061	0.968404	0.971432	0.966726	0.951879	0.93275	0.919386	0.915068	0.908945	0.897022	0.891516	0.885288	0.87528	0.868914	0.860946
afb1ox_cm	1.07213	1.06842	1.07028	1.08243	1.08804	1.0952	1.08775	1.08352	1.08533	1.08755	1.10345	1.08147	1.08123	1.09871	1.09988	1.06368	1.11362	1.14476	1.14164	1.11982	1.10402	1.08508	1.06181	1.05532	1.05147	1.03159	1.02194	1.00483	0.990491	0.978492	0.972155	0.96325	0.962949	0.953188	0.939952	0.924694	0.922983	0.908869	0.899635	0.899407	0.901234
afb1ox_cm	1.0549	1.06534	1.06225	1.06161	1.05512	1.05594	1.05684	1.07257	1.07179	1.07332	1.08562	1.08684	1.09776	1.10572	1.11866	1.13271	1.14453	1.16067	1.16223	1.16197	1.16209	1.15643	1.13477	1.11623	1.08877	1.07368	1.06736	1.05267	1.04977	1.04025	1.02519	1.00116	0.98653	0.977457	0.974585	0.957145	0.94121	0.937649	0.929234	0.924307	0.912943
afb1ox_cm	1.11368	1.10492	1.11395	1.11723	1.1248	1.13081	1.13147	1.13763	1.14047	1.13541	1.14632	1.14789	1.16453	1.16891	1.17409	1.18465	1.19879	1.20877	1.21054	1.21828	1.20724	1.20019	1.19566	1.19174	1.17471	1.15056	1.14264	1.11695	1.08977	1.056	1.03931	1.02234	1.00899	0.991239	0.980397	0.970488	0.961474	0.96125	0.958816	0.955297	0.954085
afb1ox_cm	0.973601	0.977331	0.986134	0.990436	0.957679	0.964763	0.994006	1.02598	1.04738	1.06583	1.08439	1.09042	1.08777	1.07614	1.05891	1.03729	1.0244	0.995679	0.981628	0.965492	0.937941	0.912768	0.908083	0.901157	0.894447	0.891154	0.885896	0.881294	0.87308	0.866339	0.859241	0.854911	0.858366	0.860851	0.855831	0.86258	0.859529	0.859818	0.872887	0.866807	0.85459
afb1ox_cm	0.967507	0.973406	0.967514	0.976047	0.975066	0.984752	0.999326	0.998724	1.00798	1.01468	1.02011	1.03143	1.03886	1.04376	1.0531	1.0625	1.05907	1.06045	1.0378	1.02597	1.02536	1.01814	1.00877	0.997588	0.977799	0.972802	0.954087	0.922448	0.908711	0.908753	0.904283	0.89603	0.884047	0.871879	0.868494	0.872188	0.863373	0.858778	0.860361	0.868781	0.870974
afb1ox_cm	0.977438	0.995883	0.999435	1.01069	1.00867	1.02153	1.02584	1.02735	1.02759	1.04302	1.05057	1.05527	1.07383	1.09432	1.1018	1.11389	1.11031	1.11124	1.00828	1.00942	1.10415	1.09938	1.08405	1.06205	1.02908	1.0215	1.00076	0.997106	0.983446	0.971208	0.96371	0.955002	0.940798	0.916188	0.900173	0.894346	0.882462	0.877134	0.869919	0.871215	0.86943
afb1ox_cm	0.98197	0.977135	0.96896	0.969806	0.999738	1.00393	1.01682	1.0067	0.997694	1.01651	1.01167	1.03095	1.04484	1.05445	1.05172	1.07089	1.08595	1.09873	1.10906	1.10675	1.10518	1.0966	1.09311	1.07816	1.07346	1.07283	1.05412	1.03808	1.0413	1.01395	0.996187	0.980989	0.966326	0.950171	0.953774	0.943741	0.935831	0.930563	0.925141	0.910622	0.907889
afb1ox_cm	1.00289	0.997602	1.00203	1.00814	1.00159	1.00508	0.986798	0.967287	0.974354	0.961266	0.993237	1.02171	1.02967	1.04748	1.05208	1.0524	1.0708	1.09524	1.08839	1.0982	1.08876	1.08276	1.06723	1.05815	1.0387	1.02803	1.00953	0.996516	0.97277	0.964732	0.947313	0.930188	0.926228	0.923923	0.922823	0.914133	0.906101	0.90086	0.89781	0.892125	0.882773
afb1ox_cm	0.96994	0.974831	0.9693	0.983488	0.980641	0.97524	0.960923	0.975991	0.984192	0.983235	0.992024	1.0036	1.02409	1.04565	1.06374	1.06853	1.07301	1.07594	1.08143	1.08491	1.08366	1.08808	1.07609	1.06508	1.0547	1.04135	1.04048	1.02909	1.01893	1.00854	0.985878	0.972645	0.966913	0.949482	0.941123	0.936814	0.936227	0.919269	0.903895	0.905025	0.894048
afb1ox_cm	0.976635	0.977895	0.965581	0.967943	0.965961	0.969821	0.974998	0.994773	0.998598	0.997191	1.01419	1.02496	1.03665	1.05814	1.0758	1.08284	1.08573	1.08945	1.09175	1.09726	1.09149	1.07644	1.05815	1.04367	1.041	1.01596	1.00096	0.98461	0.965097	0.953667	0.933819	0.937976	0.920299	0.911509	0.90457	0.878596	0.868662	0.875462	0.876166	0.879194	0.871606
afb1ox_cm	0.992319	1.00011	1.00789	1.01266	1.00587	1.0079	1.00737	1.00525	1.01377	1.02947	1.03135	1.0353	1.04287	1.05928	1.0466	1.03223	1.05032	1.04992	1.04634	1.04163	1.00619	1.00918	1.0047	1.00026	0.994408	0.986256	0.977746	0.962938	0.958993	0.944582	0.940556	0.941152	0.941423	0.924529	0.92477	0.925097	0.924464	0.92357	0.92709	0.938105	0.92322
afb1ox_iaa	1.00825	1.01573	1.0049	1.02198	1.04857	1.05826	1.05872	1.0569	1.06959	1.07134	1.08352	1.08887	1.10256	1.12225	1.13244	1.13454	1.13731	1.1588	1.17135	1.18576	1.18801	1.18184	1.16941	1.1763	1.13729	1.14513	1.13273	1.1024	1.11258	1.10961	1.09051	1.0695	1.05295	1.04163	1.02594	1.01613	1.00477	0.990692	0.973527	0.95261	0.936759
afb1ox_iaa	1.03487	1.03888	1.05161	1.05706	1.07067	1.07518	1.07212	1.07463	1.09747	1.10466	1.11182	1.12101	1.14001	1.15825	1.17236	1.17459	1.19184	1.20096	1.20753	1.20804	1.2112	1.21436	1.20386	1.1851	1.17836	1.17735	1.15428	1.1339	1.11594	1.0991	1.07828	1.05795	1.05255	1.02972	1.01509	1.0057	0.999894	0.987292	0.970734	0.959322	0.949797
afb1ox_iaa	1.01655	1.01473	1.02939	1.04306	1.04385	1.05071	1.05514	1.05968	1.07464	1.0805	1.08268	1.08375	1.09488	1.11988	1.12657	1.13394	1.17869	1.19185	1.1879	1.17859	1.16026	1.14713	1.12891	1.10788	1.09369	1.06844	1.05189	1.04079	1.02102	0.998023	0.994112	0.982514	0.966464	0.962011	0.95461	0.940646	0.93048	0.927549	0.913372	0.909402	0.905256
afb1ox_iaa	1.04946	1.04993	1.05901	1.09061	1.09999	1.11137	1.11342	1.12449	1.13685	1.15469	1.15823	1.16454	1.17108	1.18087	1.20913	1.20556	1.19609	1.19346	1.20143	1.21196	1.18327	1.17883	1.15885	1.13056	1.0989	1.06662	1.04235	1.03269	1.02148	1.00697	0.987619	0.972856	0.953954	0.944229	0.933879	0.913015	0.90246	0.894834	0.884707	0.875128	0.869368
afb1ox_iaa	1.03263	1.03882	1.04972	1.06403	1.06686	1.07877	1.07946	1.09515	1.10361	1.0961	1.10737	1.11593	1.11994	1.11829	1.1332	1.14249	1.14509	1.14926	1.14814	1.12948	1.12841	1.12187	1.10731	1.09921	1.07745	1.06968	1.06408	1.03963	1.02461	1.00746	0.991226	0.985772	0.973311	0.961498	0.947057	0.930854	0.919391	0.90987	0.900429	0.889519	0.883301
afb1ox_iaa	0.96998	0.974317	0.97482	0.982213	0.980997	0.980379	0.988291	0.983077	0.980425	0.985425	0.972797	0.962941	0.954234	0.973592	0.987085	0.990139	0.994497	0.99821	0.999021	0.999551	1.00776	1.01082	1.01099	1.00457	0.997035	0.991893	0.987522	0.970793	0.966274	0.968677	0.964218	0.953482	0.946148	0.937003	0.924341	0.921015	0.910948	0.911061	0.912645	0.911216	0.903865
afb1ox_iaa	1.09648	1.11212	1.12638	1.14355	1.14933	1.15517	1.16946	1.1689	1.17975	1.20136	1.19557	1.19243	1.2143	1.20931	1.17911	1.18059	1.18948	1.20344	1.20445	1.17795	1.15663	1.13978	1.1257	1.11328	1.08844	1.07529	1.05638	1.04286	1.03208	1.01567	1.00995	1.00422	0.983852	0.977186	0.966837	0.953301	0.934075	0.93645	0.938723	0.929505	0.933964
afb1ox_iaa	1.11895	1.14242	1.16135	1.1684	1.17637	1.19847	1.20964	1.2131	1.22556	1.20329	1.21899	1.25681	1.2821	1.29274	1.30879	1.33538	1.34302	1.3339	1.32755	1.32243	1.30065	1.28699	1.27417	1.24359	1.22452	1.20051	1.18576	1.16252	1.14258	1.12196	1.09884	1.08643	1.07811	1.05949	1.03751	1.03172	1.01257	1.00575	0.996138	0.981974	0.977696
afb1ox_iaa	1.10884	1.10931	1.12038	1.12674	1.12877	1.14257	1.14145	1.14016	1.1469	1.16222	1.17482	1.1897	1.20277	1.20814	1.19662	1.19166	1.18228	1.19857	1.20087	1.20163	1.18617	1.16451	1.14779	1.13503	1.12092	1.09872	1.08118	1.0787	1.06082	1.048	1.04612	1.03518	1.02682	1.0245	1.0076	1.00378	0.98773	0.976234	0.972962	0.966749	0.958945
afb1ox_iaa	1.11938	1.12114	1.12844	1.14161	1.16072	1.16762	1.17134	1.18377	1.19731	1.20763	1.21491	1.21998	1.22957	1.24827	1.25724	1.27976	1.2828	1.26675	1.25831	1.2542	1.24379	1.22769	1.21772	1.18378	1.17519	1.17149	1.1631	1.14592	1.11661	1.11834	1.09903	1.08967	1.0787	1.06836	1.04945	1.04398	1.04759	1.02791	1.01868	1.00976	0.996053
afb1ox_iaa	1.12476	1.11933	1.12993	1.14356	1.16655	1.19189	1.20722	1.21854	1.22266	1.22743	1.24379	1.26099	1.27726	1.27264	1.28087	1.29256	1.31162	1.32392	1.30601	1.25706	1.22119	1.20759	1.19591	1.17913	1.16659	1.15138	1.12921	1.11323	1.10159	1.08671	1.07604	1.06212	1.04831	1.04062	1.03371	1.02404	1.01497	1.01289	1.00642	0.991079	0.984582
afb1ox_iaa	1.14655	1.16425	1.17664	1.17339	1.14195	1.09938	1.1594	1.21841	1.24057	1.26061	1.26756	1.27947	1.27745	1.30629	1.3331	1.35108	1.32638	1.32056	1.31764	1.29323	1.27711	1.26149	1.23501	1.21068	1.18419	1.16919	1.15337	1.11488	1.10984	1.11175	1.10265	1.08605	1.06989	1.06698	1.04157	1.0251	1.01902	1.01216	1.01343	1.0039	0.995478
afb1ox_iaa	1.04757	1.07801	1.06926	1.08383	1.09676	1.11858	1.13213	1.14153	1.15156	1.14378	1.15906	1.17617	1.18216	1.20531	1.22391	1.23356	1.21426	1.27463	1.29449	1.32081	1.32118	1.33262	1.3296	1.32896	1.31955	1.28571	1.27618	1.25448	1.22784	1.22026	1.20134	1.17568	1.15071	1.12003	1.09737	1.07244	1.05208	1.03681	1.03308	1.03447	1.02014
afb1ox_iaa	1.03145	1.03426	1.00929	1.02156	1.04436	1.05742	1.07366	1.07086	1.08146	1.07911	1.10128	1.11759	1.13454	1.1625	1.18219	1.19813	1.2041	1.21696	1.23597	1.26113	1.27169	1.2614	1.26377	1.2574	1.24567	1.2071	1.19735	1.18992	1.17487	1.16347	1.13673	1.10424	1.0801	1.06669	1.0476	1.02281	1.00997	1.01147	0.995859	0.977665	0.969387
afb1ox_iaa	1.04354	1.01103	1.001	0.998888	1.03948	1.08302	1.07178	1.09206	1.10588	1.11602	1.12578	1.13784	1.14972	1.16318	1.19293	1.21399	1.22475	1.21619	1.22452	1.21758	1.2366	1.24308	1.23694	1.23334	1.2036	1.1877	1.17166	1.14475	1.12947	1.09581	1.06785	1.0597	1.05394	1.03446	1.00949	0.993666	0.980593	0.97353	0.960038	0.948553	0.942459
afb1ox_iaa	1.02944	1.0445	1.05536	1.0387	1.03715	1.0747	1.09284	1.11656	1.12214	1.13057	1.13036	1.14096	1.16708	1.16691	1.19234	1.20596	1.21391	1.22746	1.25898	1.27511	1.28095	1.26739	1.26766	1.25761	1.23531	1.22188	1.20646	1.19162	1.14944	1.1231	1.12643	1.11158	1.09753	1.07493	1.05176	1.03131	1.01698	1.00211	0.994267	0.992165	0.990273
afb1ox_iaa	1.02889	1.04392	1.0507	1.03747	1.04157	1.05878	1.07574	1.07715	1.08545	1.09515	1.09785	1.12623	1.14619	1.15843	1.16188	1.16609	1.18032	1.1823	1.19774	1.20214	1.19834	1.19307	1.17239	1.16292	1.14789	1.12955	1.11064	1.08469	1.06511	1.06255	1.05285	1.0374	1.01948	1.01732	0.999243	0.984086	0.96728	0.939635	0.930987	0.9417	0.939062
afb1ox_iaa	1.0441	1.05164	1.02647	1.02091	1.03726	1.06585	1.08461	1.10409	1.10497	1.12096	1.15285	1.16654	1.18716	1.20321	1.21834	1.22352	1.23126	1.24191	1.2599	1.25857	1.26131	1.22179	1.21403	1.2476	1.26567	1.25325	1.2449	1.23448	1.21237	1.17841	1.15476	1.11915	1.10353	1.10093	1.0744	1.04591	1.03222	1.03129	1.01714	1.00386	0.991564
afb1ox_iaa	1.05543	1.06494	1.0787	1.08162	1.08252	1.08425	1.09307	1.09907	1.10206	1.11548	1.10955	1.08568	1.11562	1.14025	1.15109	1.15479	1.19641	1.20141	1.22139	1.2268	1.21464	1.20961	1.20162	1.17701	1.16819	1.15473	1.12941	1.09701	1.09093	1.05711	1.03931	1.03485	1.03228	1.02715	1.00205	0.999167	0.990712	0.983622	0.974553	0.965929	0.966419
afb1ox_iaa	1.04112	1.0516	1.05053	1.062	1.07443	1.08891	1.09821	1.12104	1.12782	1.14673	1.15494	1.15829	1.17185	1.20579	1.16689	1.13875	1.12936	1.10923	1.0853	1.0829	1.07277	1.06493	1.06441	1.04504	1.04513	1.03011	1.01477	0.997287	0.985539	0.978684	0.957049	0.949812	0.950631	0.944574	0.937943	0.9339	0.926841	0.92852	0.924684	0.922197	0.916564

## Sheet: 4f
distance from root tip (µm)	0	20	40	60	80	100	120	140	160	180	200	220	240	260	280	300	320	340	360	380	400	420	440	460	480	500	520	540	560	580	600	620	640	660	680	700	720	740	760	780	800
col_cm	1.03734	1.04238	1.04989	1.05682	1.06046	1.05821	1.04273	1.05208	1.05808	1.06818	1.08508	1.09098	1.09297	1.10376	1.11148	1.12269	1.13516	1.13397	1.13358	1.12978	1.1316	1.11858	1.09347	1.06874	1.04462	1.01741	0.99807	0.986247	0.966479	0.950183	0.931783	0.923101	0.912083	0.900648	0.894202	0.884617	0.881005	0.873467	0.872907	0.866764	0.859149
col_cm	1.0089	1.01118	1.00536	1.00373	1.01208	1.01484	1.01923	1.02078	1.02456	1.02114	1.02516	1.0303	1.03059	1.0346	1.03941	1.04105	1.03914	1.04028	1.03129	1.01367	0.99857	0.982834	0.968859	0.951468	0.93988	0.918149	0.901773	0.889887	0.878118	0.8656	0.852121	0.846825	0.837762	0.831691	0.828136	0.819498	0.811718	0.812947	0.811927	0.813865	0.811022
col_cm	0.996387	1.00326	1.0034	1.00877	1.01287	1.01113	1.00505	1.01202	1.0209	1.0367	1.03871	1.04097	1.0498	1.05596	1.05902	1.06345	1.07194	1.06999	1.06662	1.05184	1.03085	1.012	0.994552	0.976104	0.955403	0.934469	0.920144	0.906404	0.895029	0.885614	0.874946	0.874138	0.867823	0.861974	0.857199	0.852591	0.845785	0.841488	0.834543	0.828106	0.82255
col_cm	0.986095	0.987411	0.993902	0.999067	1.00473	1.01023	1.00908	1.00779	0.989357	0.992188	0.989089	0.981238	0.98498	1.0164	1.03449	1.03769	1.03428	1.03017	1.02192	1.00514	0.985518	0.970947	0.947302	0.930229	0.914482	0.898382	0.883478	0.869593	0.855727	0.846524	0.832821	0.82544	0.812995	0.807998	0.797017	0.791618	0.791857	0.791368	0.788891	0.789249	0.787966
col_cm	0.982441	0.987083	0.987503	0.988138	0.99662	0.998232	0.998342	1.00154	1.00026	0.997742	0.997588	1.00236	1.0015	1.00563	1.00552	1.01226	1.01505	1.01488	1.00856	0.990273	0.97707	0.953158	0.938793	0.916862	0.906419	0.888252	0.871348	0.861716	0.853628	0.839243	0.834799	0.829821	0.826517	0.818428	0.81044	0.81426	0.812709	0.810806	0.804838	0.799815	0.802184
col_cm	1.00461	1.00882	1.0188	1.02295	1.0279	1.02458	1.03151	1.04241	1.04129	1.0393	1.04103	1.04004	1.04401	1.0529	1.05735	1.06135	1.07213	1.08322	1.08854	1.08742	1.08801	1.06999	1.05674	1.03675	1.01689	1.00016	0.98474	0.97474	0.953181	0.94073	0.915392	0.907199	0.902884	0.897698	0.88773	0.882746	0.878662	0.867899	0.862219	0.855243	0.852562
col_cm	0.989614	0.992627	1.00487	1.00852	1.01106	1.01888	1.02729	1.03269	1.03855	1.04279	1.04184	1.0468	1.05069	1.04835	1.0503	1.05654	1.06901	1.07883	1.08607	1.09594	1.09747	1.09799	1.0895	1.0738	1.06178	1.04568	1.02541	1.01175	0.995566	0.98186	0.967963	0.948225	0.936993	0.92665	0.91007	0.89568	0.885958	0.875732	0.870504	0.862917	0.853723
col_cm	0.999366	1.00187	1.00764	1.01078	1.01626	1.02378	1.02813	1.02913	1.02697	1.02475	1.02645	1.02721	1.03052	1.03438	1.03558	1.03741	1.03912	1.04762	1.04162	1.03858	1.03516	1.02647	1.01087	0.997381	0.984445	0.970631	0.957	0.93982	0.926363	0.914361	0.900431	0.887671	0.882001	0.877057	0.872627	0.861661	0.854828	0.848511	0.839523	0.835591	0.830187
col_cm	0.99969	1.00507	1.01154	1.01557	1.01636	1.02932	1.03285	1.03842	1.04318	1.04965	1.05587	1.06032	1.06465	1.07658	1.08767	1.08275	1.07608	1.06883	1.09579	1.08113	1.07313	1.07634	1.07237	1.05688	1.04605	1.02859	1.01257	0.99857	0.987361	0.975162	0.966537	0.954077	0.941988	0.933262	0.928485	0.918935	0.91022	0.903772	0.894599	0.886394	0.876419
col_cm	0.99555	1.00192	1.00656	1.01102	1.019	1.0222	1.02637	1.03354	1.03737	1.03813	1.0364	1.03919	1.04137	1.04681	1.05873	1.06735	1.07032	1.07641	1.07623	1.07756	1.07505	1.0628	1.04777	1.03042	1.00915	0.993788	0.978404	0.959483	0.941846	0.931992	0.917046	0.904535	0.894792	0.886346	0.880079	0.865676	0.851119	0.841328	0.840692	0.840081	0.837652
col_cm	1.06132	1.06444	1.07345	1.0695	1.06863	1.07136	1.0667	1.07725	1.0845	1.08681	1.10234	1.11488	1.11589	1.11534	1.11611	1.10988	1.10061	1.08316	1.07913	1.06038	1.03339	1.00843	0.981021	0.947831	0.9273	0.912053	0.893693	0.876015	0.860504	0.844563	0.831261	0.823602	0.816635	0.812	0.803449	0.798752	0.798125	0.797198	0.791531	0.794131	0.797244
col_cm	1.09685	1.09652	1.09094	1.093	1.08529	1.08869	1.09425	1.09157	1.09112	1.085	1.08889	1.09452	1.09159	1.0953	1.09169	1.09394	1.09144	1.08007	1.06262	1.05557	1.03844	1.02127	1.00833	0.998843	0.983828	0.970588	0.961766	0.946322	0.931609	0.924545	0.909838	0.894466	0.890873	0.884576	0.876187	0.865319	0.857662	0.858278	0.849512	0.846587	0.842367
col_cm	1.00987	1.01396	1.01421	1.01632	1.01909	1.01723	1.01325	1.00799	1.01646	1.01755	1.01718	1.02066	1.02702	1.02733	1.02657	1.03154	1.03602	1.04295	1.045	1.04233	1.03567	1.03318	1.02343	1.0004	0.981124	0.961809	0.946183	0.934234	0.919198	0.903845	0.888698	0.871643	0.859118	0.852869	0.837182	0.827489	0.820028	0.811649	0.806788	0.799287	0.789786
col_cm	1.022	1.02164	1.02145	1.02333	1.02384	1.02331	1.01446	1.01244	1.0112	1.00827	1.00744	1.00364	1.00768	1.01081	1.01014	1.00513	1.00829	1.0139	1.01703	1.01595	1.01386	1.00271	0.989265	0.972407	0.955751	0.938637	0.92092	0.903584	0.886926	0.868961	0.85326	0.83816	0.827249	0.81746	0.809529	0.8045	0.80303	0.788733	0.781504	0.780999	0.774441
col_cm	0.954565	0.956732	0.95778	0.953656	0.951905	0.952252	0.95635	0.9626	0.973621	0.973667	0.974843	0.978526	0.976046	0.975888	0.979681	0.982232	0.98072	0.986442	0.988949	0.990118	0.989021	0.985517	0.981965	0.973204	0.960216	0.943311	0.927949	0.918149	0.904531	0.894163	0.879032	0.866652	0.856505	0.845521	0.835335	0.826037	0.823771	0.80445	0.79572	0.7927	0.785457
col_cm	0.980315	0.984329	0.984048	0.985204	0.985212	0.99194	0.988591	0.985759	0.987371	0.985439	0.984864	0.982385	0.981795	0.979209	0.981035	0.978163	0.979813	0.97767	0.975914	0.976689	0.97449	0.971638	0.962665	0.9579	0.947187	0.934957	0.924877	0.914404	0.902457	0.892676	0.880535	0.86819	0.853989	0.842582	0.833518	0.825746	0.819468	0.811734	0.799039	0.797358	0.78508
col_cm	0.931212	0.936583	0.938945	0.939369	0.94426	0.951981	0.950246	0.953195	0.949815	0.954469	0.960458	0.961709	0.966048	0.967367	0.96983	0.966196	0.957022	0.947224	0.936044	0.924832	0.911601	0.892069	0.88113	0.866584	0.848406	0.834722	0.821206	0.814195	0.805683	0.799583	0.795574	0.789398	0.777865	0.77127	0.766995	0.757667	0.756129	0.753543	0.754375	0.756065	0.753952
col_cm	0.94386	0.944517	0.950033	0.953028	0.955548	0.959318	0.960656	0.965692	0.968911	0.969815	0.971108	0.975396	0.973667	0.976457	0.98368	0.989784	0.989488	0.993254	0.992741	0.989384	0.980425	0.971824	0.963351	0.95014	0.939061	0.921838	0.915174	0.90146	0.888725	0.876422	0.862871	0.849858	0.841844	0.833727	0.828227	0.816983	0.815902	0.807151	0.805819	0.800545	0.79484
col_cm	1.00564	1.00713	1.01095	1.00813	1.00729	1.00633	1.00607	1.00658	1.00763	1.0051	0.998289	0.994172	0.995834	1.00488	1.0108	1.00569	0.995464	0.984618	0.970689	0.947694	0.933472	0.918801	0.90095	0.883524	0.869776	0.861179	0.848126	0.839402	0.832776	0.824573	0.819055	0.814531	0.808765	0.807057	0.801806	0.80157	0.797525	0.793126	0.788007	0.786136	0.786258
col_cm	1.02043	1.02488	1.02249	1.03226	1.03372	1.03205	1.03404	1.03447	1.02773	1.02333	1.02004	1.02025	1.01438	1.01649	1.01462	1.01168	1.016	1.01076	1.00293	1.00419	0.994145	0.988647	0.977546	0.961	0.9459	0.937602	0.924696	0.910347	0.900001	0.887992	0.882844	0.870783	0.864236	0.858183	0.852093	0.846792	0.836506	0.832789	0.831745	0.824037	0.81958
col_cm	0.974963	0.967442	0.966143	0.951596	0.938853	0.93808	0.955155	0.971103	0.971003	0.973806	0.984447	0.983732	0.986075	0.987461	0.995448	0.995658	0.987511	0.981288	0.968304	0.948156	0.929733	0.916288	0.900081	0.886517	0.879302	0.869441	0.855207	0.844515	0.839978	0.835215	0.826419	0.824198	0.816466	0.81076	0.809325	0.804461	0.796399	0.797712	0.794816	0.79377	0.785336
col_cm	0.966359	0.96816	0.971836	0.973659	0.97475	0.974679	0.981103	0.986564	0.983102	0.987055	0.993726	0.992754	0.991635	1.00246	0.995411	0.992128	0.985843	0.976414	0.960509	0.936201	0.915042	0.901116	0.882797	0.864629	0.854105	0.841249	0.834332	0.831496	0.823202	0.817937	0.813016	0.807399	0.805272	0.803811	0.79793	0.796082	0.797558	0.796251	0.798344	0.801505	0.798471
col_cm	0.980233	0.984821	0.989392	0.993585	0.999147	0.996442	1.00029	0.999292	0.998117	1.00565	0.999796	1.0038	1.00211	1.0087	1.01388	1.01803	1.01708	1.01509	1.00796	0.995408	0.979095	0.95786	0.942602	0.926583	0.915589	0.902348	0.895266	0.885353	0.872999	0.865095	0.850236	0.842462	0.837171	0.829824	0.833992	0.835884	0.839459	0.835193	0.834873	0.832793	0.826008
col_cm	1.00553	1.00858	1.01763	1.01809	1.02175	1.02412	1.02903	1.03057	1.02421	1.02593	1.02643	1.02678	1.0245	1.02918	1.04233	1.04912	1.06571	1.0747	1.08201	1.08894	1.08296	1.08246	1.06302	1.04441	1.02243	0.997045	0.975608	0.957748	0.946407	0.927552	0.919022	0.906334	0.896879	0.886293	0.876609	0.865077	0.856335	0.845023	0.838244	0.831532	0.823165
col_cm	1.01718	1.01436	1.02489	1.02887	1.03167	1.03311	1.03359	1.035	1.03575	1.03785	1.03939	1.04149	1.0453	1.04917	1.05271	1.05645	1.06477	1.07405	1.07305	1.06801	1.06556	1.05955	1.05155	1.04138	1.0251	1.01248	0.994084	0.973842	0.959736	0.944151	0.929524	0.91952	0.910413	0.897997	0.888413	0.875693	0.868489	0.860672	0.850686	0.848473	0.83909
col_cm	1.02677	1.03424	1.03736	1.03693	1.03714	1.03371	1.04202	1.0367	1.02279	1.01619	1.01738	1.02057	1.02772	1.04054	1.04355	1.04848	1.05718	1.06176	1.06103	1.05722	1.03955	1.03109	1.01777	1.00459	0.990967	0.979987	0.968828	0.955805	0.946708	0.941386	0.930198	0.920906	0.912506	0.90215	0.895818	0.887218	0.890405	0.880402	0.87767	0.870853	0.866184
col_cm	1.00576	1.00819	1.01131	1.01464	1.01378	1.01363	1.01845	1.01733	1.0038	1.00578	1.00659	1.01918	1.02512	1.03057	1.03044	1.035	1.04629	1.04144	1.04261	1.03824	1.0324	1.02095	1.0097	0.993833	0.978058	0.966704	0.950294	0.933218	0.921682	0.909222	0.898881	0.892658	0.879993	0.872793	0.866707	0.856291	0.848908	0.841161	0.838326	0.833243	0.828764
col_cm	0.997131	1.00511	1.01892	1.01582	1.01911	1.024	1.02345	1.02282	1.02607	1.02842	1.02827	1.02509	1.02344	1.02785	1.03215	1.03327	1.03724	1.05082	1.05817	1.06268	1.05688	1.03719	1.03161	1.03327	1.01956	1.00486	0.983112	0.9721	0.958435	0.943576	0.928765	0.923489	0.906022	0.890979	0.880617	0.876868	0.869133	0.857419	0.853241	0.840753	0.836294
col_cm	0.992405	0.995687	0.997776	1.01139	1.00891	1.00742	0.99636	1.00085	1.00608	1.01312	1.02897	1.03168	1.03894	1.03949	1.04053	1.03584	1.02605	1.01811	1.00641	0.990543	0.978637	0.964891	0.9462	0.939349	0.92759	0.913767	0.902387	0.892344	0.883144	0.87497	0.8656	0.859613	0.853799	0.848218	0.839119	0.836083	0.83088	0.820027	0.819192	0.817664	0.810617
col_cm	0.985537	0.981355	0.979261	0.983746	0.989016	0.991535	0.986648	0.994396	0.991721	0.992759	0.995306	0.997866	1.00385	1.00596	1.01221	1.02165	1.02976	1.03806	1.04156	1.03544	1.02444	1.02277	1.01342	1.00479	0.985176	0.972005	0.954242	0.938154	0.924418	0.906804	0.894287	0.884542	0.876172	0.864633	0.857853	0.855154	0.851618	0.850733	0.840761	0.838037	0.838074
col_cm	0.988003	0.989782	0.988258	0.995628	0.998375	1.00038	0.999393	0.996278	0.989339	0.988835	0.984427	0.983137	0.976039	0.976591	0.974865	0.975478	0.982161	0.981709	0.975678	0.967021	0.954138	0.942286	0.928573	0.912555	0.899508	0.887742	0.874766	0.865312	0.856962	0.850567	0.843988	0.840569	0.835714	0.830699	0.827676	0.823119	0.820864	0.811493	0.807931	0.80251	0.801372
col_cm	0.99181	0.99873	1.00153	1.00362	0.997603	0.994459	0.992089	0.991019	0.985539	0.983173	0.980457	0.976457	0.96593	0.971538	0.986093	0.995652	0.994133	0.986482	0.97905	0.966244	0.952897	0.935579	0.919986	0.903873	0.884201	0.872569	0.862661	0.850847	0.844655	0.835354	0.824253	0.812833	0.806818	0.806474	0.800804	0.803632	0.802071	0.79874	0.798394	0.796872	0.796407
col_cm	0.994051	1.00232	1.0077	1.01195	1.0145	1.01238	1.0069	1.00812	1.00608	1.01636	1.01637	1.01143	0.999882	0.995308	1.00866	1.02454	1.02974	1.03492	1.04346	1.04713	1.04309	1.03417	1.02283	1.00566	0.99241	0.971902	0.95168	0.932573	0.921245	0.907758	0.893896	0.880996	0.872465	0.866264	0.858417	0.847705	0.842381	0.839418	0.831147	0.831217	0.826811
col_cm	1.01469	1.01801	1.02322	1.02922	1.01986	1.02139	1.01824	1.01758	1.02249	1.02085	1.02293	1.03561	1.04161	1.0463	1.05133	1.05852	1.06592	1.06959	1.07288	1.06587	1.05666	1.04098	1.02922	1.01523	0.996778	0.979362	0.96935	0.953674	0.940747	0.921668	0.907579	0.89828	0.888721	0.881163	0.880578	0.877626	0.875028	0.865048	0.863667	0.856092	0.852601
col_cm	1.01749	1.02341	1.02354	1.00402	1.0124	1.02227	1.02406	1.04358	1.05925	1.06568	1.06372	1.06492	1.07342	1.06566	1.05332	1.04018	1.02987	1.00843	0.996116	0.980292	0.959028	0.948648	0.935626	0.92684	0.910289	0.906756	0.895323	0.886663	0.877419	0.873174	0.869506	0.865209	0.862363	0.856529	0.848849	0.850446	0.848982	0.843951	0.837349	0.832758	0.832518
col_cm	1.00306	1.00672	1.00976	1.01607	1.0163	1.00688	1.00422	0.97609	0.988518	1.01108	1.01046	1.00997	1.01586	1.0146	1.02118	1.02432	1.0174	1.01259	1.00406	0.991813	0.976585	0.960126	0.942483	0.927574	0.908196	0.893473	0.881137	0.869534	0.858643	0.852236	0.846702	0.841723	0.834188	0.827782	0.826003	0.821823	0.817239	0.809906	0.810832	0.80794	0.800455
col_cm	0.999942	0.999136	0.997456	1.00073	0.999182	0.995056	1.00099	1.00025	0.997187	0.996516	0.996479	0.994424	0.992081	0.992867	0.994888	0.990871	0.98499	0.990252	0.991045	1.00942	1.01503	1.01546	1.01157	0.998689	0.991133	0.972928	0.958988	0.946648	0.929307	0.91916	0.902009	0.890804	0.880762	0.87199	0.865802	0.854256	0.849739	0.839554	0.839498	0.838686	0.823681
col_cm	1.01301	1.02041	1.02093	1.0233	1.03304	1.04012	1.03855	1.04047	1.04307	1.04758	1.04637	1.04747	1.05045	1.05152	1.06301	1.0694	1.07518	1.07054	1.07009	1.06676	1.05955	1.04401	1.02102	1.00443	0.980566	0.957261	0.940704	0.924108	0.912961	0.899821	0.89011	0.878731	0.870321	0.859161	0.853596	0.845135	0.839022	0.832496	0.832942	0.828621	0.825918
col_cm	0.993975	0.994665	0.998792	1.00544	1.00539	1.00709	1.00967	1.01264	1.01614	1.02056	1.01864	1.0228	1.03022	1.03184	1.03875	1.04639	1.05699	1.05485	1.05683	1.05197	1.04415	1.03696	1.02493	1.01416	1.00322	0.987774	0.966399	0.947554	0.929526	0.917936	0.903828	0.895752	0.886634	0.877703	0.87439	0.872857	0.867446	0.855802	0.855331	0.847486	0.839688
col_cm	0.98642	0.993447	0.994281	0.994106	0.997781	0.997897	0.996384	1.0024	1.00129	0.995507	1.00207	1.00324	1.00305	1.0126	1.01794	1.02784	1.03295	1.03759	1.03626	1.0285	1.0196	1.00475	0.991408	0.980658	0.968622	0.956028	0.942006	0.936769	0.924808	0.918787	0.909407	0.905631	0.896234	0.890806	0.87943	0.871309	0.870987	0.868252	0.865681	0.865502	0.862614
col_cm	1.01702	1.01717	1.01991	1.02116	1.02634	1.03081	1.03103	1.0313	1.03215	1.0312	1.03437	1.03805	1.0395	1.0448	1.05255	1.05624	1.06601	1.0733	1.0741	1.0681	1.06117	1.05526	1.05003	1.03183	1.01519	0.999476	0.982088	0.971687	0.958478	0.944106	0.932538	0.921088	0.909128	0.89666	0.89091	0.878586	0.872342	0.865804	0.855428	0.857962	0.848104
col_cm	0.998112	1.00309	1.00604	1.00581	1.01451	1.01969	1.02557	1.02602	1.02928	1.03116	1.03305	1.0337	1.03964	1.05151	1.0589	1.0649	1.06514	1.05798	1.05346	1.0613	1.06075	1.05545	1.0425	1.02768	1.0129	0.994093	0.97418	0.958989	0.936317	0.933243	0.922473	0.908963	0.898377	0.888778	0.879369	0.873688	0.866102	0.858548	0.849742	0.846555	0.839868
col_cm	0.991148	0.998575	1.00151	1.00389	1.01321	1.00365	1.00585	1.00626	1.00324	1.00762	1.00893	1.01062	1.00662	1.0109	1.00938	1.01154	1.01404	1.01846	1.02277	1.02598	1.03515	1.04336	1.05347	1.05637	1.05819	1.05835	1.05399	1.04866	1.04059	1.02312	1.00534	0.994377	0.968737	0.949368	0.933116	0.915265	0.894534	0.882941	0.875548	0.872051	0.864045
col_cm	0.998812	1.00324	1.0145	1.01967	1.01758	1.01576	1.02289	1.02476	1.02782	1.02772	1.03561	1.04481	1.05205	1.0598	1.07246	1.07624	1.08924	1.09906	1.10559	1.10653	1.1094	1.11238	1.09998	1.08132	1.06172	1.03612	1.02292	0.995772	0.972743	0.956551	0.9448	0.93183	0.926977	0.913317	0.900442	0.891342	0.88633	0.876247	0.867773	0.861385	0.858391
col_cm	0.988844	0.995474	0.998242	0.999523	1.00157	1.00633	1.01075	1.01189	1.02464	1.02686	1.02161	1.00313	1.00581	1.02033	1.03155	1.03665	1.02745	1.02141	1.01315	1.0062	0.995521	0.991533	0.979067	0.970952	0.964745	0.954936	0.945723	0.939949	0.932813	0.926832	0.922418	0.915114	0.909849	0.90517	0.898951	0.893023	0.887659	0.882531	0.882433	0.880318	0.872647
col_cm	1.01432	1.02099	1.02413	1.03595	1.04517	1.04827	1.06057	1.06479	1.06801	1.0807	1.08754	1.09528	1.10417	1.11312	1.12375	1.12845	1.13408	1.12482	1.11966	1.10799	1.10013	1.08823	1.07545	1.06017	1.05097	1.02807	1.00901	0.987963	0.958963	0.93792	0.922842	0.915926	0.907954	0.892915	0.882482	0.866983	0.858345	0.850692	0.842647	0.834643	0.833828
col_cm	1.01823	1.0229	1.02804	1.03075	1.03169	1.03571	1.0385	1.04125	1.04388	1.05528	1.05679	1.06249	1.06958	1.07002	1.07175	1.0641	1.07234	1.07086	1.07164	1.07493	1.09176	1.08479	1.06652	1.04529	1.02942	1.01358	1.00156	0.990906	0.974454	0.957313	0.946178	0.937089	0.924473	0.912653	0.906957	0.898477	0.893964	0.887801	0.886219	0.880113	0.872149
col_cm	0.993124	1.00174	1.00147	1.00535	1.00653	1.01068	1.01419	1.02335	1.02638	1.02915	1.03775	1.04692	1.05383	1.06344	1.07566	1.08845	1.09807	1.10393	1.09963	1.09789	1.09077	1.0797	1.0565	1.02712	1.01649	0.996344	0.970065	0.953458	0.942286	0.923683	0.920457	0.905264	0.895677	0.88205	0.86999	0.865468	0.85696	0.855406	0.845745	0.838274	0.832337
cngc_cm	0.979439	0.982093	0.979723	0.98615	0.9889	0.991605	0.99595	0.994878	0.987249	0.975917	0.974962	0.983025	0.992647	0.990473	0.984717	1.01483	1.02123	1.01672	1.0097	1.0064	0.991716	0.977515	0.966394	0.957371	0.952634	0.939918	0.935439	0.932783	0.927211	0.915858	0.911347	0.906572	0.897596	0.892079	0.884804	0.876715	0.871079	0.866601	0.859087	0.848503	0.84831
cngc_cm	0.957236	0.956276	0.957781	0.959363	0.958736	0.96594	0.964751	0.962167	0.963902	0.958749	0.960189	0.957613	0.962161	0.956814	0.954474	0.954158	0.952477	0.949313	0.943679	0.94331	0.936016	0.928311	0.920444	0.915394	0.905282	0.897665	0.892082	0.886658	0.881696	0.876298	0.868721	0.860794	0.862668	0.861349	0.852416	0.846186	0.849728	0.843646	0.842835	0.84004	0.838457
cngc_cm	0.971504	0.980415	0.983804	0.983891	0.987268	0.987609	0.988758	0.991071	0.993718	0.996068	1.00494	1.00253	0.997831	0.998241	1.00244	1.00625	1.01011	1.00543	0.998437	0.994648	0.981612	0.968139	0.953549	0.927276	0.941753	0.936962	0.927642	0.918919	0.912252	0.906106	0.898337	0.891399	0.88703	0.875019	0.866788	0.861218	0.853814	0.850003	0.844323	0.844053	0.834101
cngc_cm	0.95556	0.958843	0.962027	0.965448	0.962019	0.964342	0.961811	0.965325	0.961705	0.959601	0.959395	0.958789	0.957807	0.957229	0.961342	0.956828	0.954198	0.955445	0.952319	0.94948	0.948745	0.941662	0.937432	0.932698	0.926383	0.920122	0.913156	0.907846	0.901087	0.88997	0.876402	0.873163	0.87339	0.859905	0.857112	0.853032	0.84709	0.845717	0.830721	0.832	0.828847
cngc_cm	0.953818	0.954942	0.958441	0.958982	0.95837	0.962087	0.960311	0.960739	0.959042	0.964373	0.962376	0.962092	0.967113	0.965563	0.968065	0.966778	0.967759	0.964426	0.962648	0.961282	0.955716	0.95245	0.942706	0.933261	0.923458	0.917434	0.91079	0.901216	0.897832	0.885047	0.878299	0.871033	0.860985	0.85865	0.854948	0.84689	0.840764	0.838298	0.830792	0.824006	0.823577
cngc_cm	0.964987	0.962982	0.956765	0.960912	0.937365	0.945949	0.97136	0.970076	0.966862	0.962318	0.959676	0.955198	0.953856	0.954529	0.956572	0.957375	0.955015	0.950985	0.944654	0.930292	0.919435	0.911112	0.904361	0.89921	0.889426	0.874178	0.865155	0.856257	0.849182	0.841504	0.834888	0.82759	0.829722	0.822458	0.824242	0.816375	0.814101	0.811736	0.804921	0.807274	0.809354
cngc_cm	0.966313	0.964943	0.964591	0.97044	0.978338	0.983104	0.985697	0.985322	0.983208	0.976671	0.962429	0.965873	0.967684	0.966929	0.965243	0.964281	0.963292	0.960525	0.955694	0.953339	0.941963	0.931964	0.923044	0.912845	0.902861	0.898379	0.888607	0.882796	0.876069	0.866848	0.860531	0.855624	0.847245	0.841338	0.834396	0.830155	0.821674	0.816455	0.817237	0.819286	0.817567
cngc_cm	0.962709	0.963699	0.96388	0.962608	0.965122	0.972805	0.971496	0.970385	0.97684	0.968946	0.96636	0.969046	0.973945	0.969979	0.968604	0.969194	0.967464	0.969657	0.97083	0.965969	0.96381	0.955886	0.948687	0.937314	0.928723	0.92072	0.912195	0.90833	0.900326	0.894112	0.892128	0.884114	0.872183	0.870065	0.861415	0.85932	0.854323	0.849132	0.837897	0.833094	0.832427
cngc_cm	0.954601	0.96172	0.962523	0.972671	0.972868	0.96563	0.971417	0.967388	0.967805	0.972522	0.966088	0.970622	0.968136	0.963777	0.963825	0.964238	0.956647	0.947623	0.942164	0.934541	0.924775	0.915004	0.906764	0.899428	0.891031	0.883964	0.874428	0.87055	0.861835	0.858489	0.853722	0.852567	0.84611	0.838972	0.832862	0.828663	0.828799	0.822382	0.819043	0.816339	0.809128
cngc_cm	0.864198	0.864051	0.86842	0.870774	0.867889	0.867287	0.873917	0.871003	0.871989	0.874646	0.877636	0.878218	0.886166	0.888626	0.890093	0.894962	0.898774	0.901301	0.901705	0.897584	0.893705	0.885858	0.87629	0.865244	0.85233	0.837429	0.83285	0.828485	0.825266	0.79838	0.76266	0.760856	0.79101	0.797301	0.794291	0.792333	0.785621	0.778579	0.770408	0.768124	0.763766
cngc_cm	0.879391	0.875746	0.885323	0.880275	0.885965	0.882396	0.88465	0.889224	0.88341	0.882882	0.889898	0.885121	0.883352	0.888806	0.89225	0.886895	0.882348	0.881742	0.875252	0.870439	0.865815	0.851527	0.839287	0.837165	0.830119	0.822307	0.81492	0.776742	0.79192	0.795454	0.790474	0.784536	0.777813	0.774027	0.773288	0.771165	0.76796	0.761164	0.75333	0.751495	0.74691
cngc_cm	0.878302	0.88079	0.883995	0.885361	0.885181	0.885602	0.885647	0.88764	0.874244	0.86659	0.864808	0.867287	0.870662	0.87633	0.873548	0.8771	0.877895	0.874181	0.86874	0.865103	0.857461	0.859264	0.852663	0.846619	0.841299	0.833253	0.829164	0.82691	0.815367	0.809327	0.804678	0.797712	0.792982	0.792138	0.785019	0.783041	0.775734	0.769438	0.76509	0.762784	0.755763
cngc_cm	0.892825	0.893902	0.891959	0.8893	0.889579	0.893376	0.890413	0.895782	0.895796	0.900193	0.895247	0.882834	0.876677	0.879372	0.881984	0.879475	0.879214	0.879346	0.875931	0.873575	0.865327	0.861652	0.856149	0.848659	0.844824	0.837406	0.82947	0.818997	0.8091	0.800849	0.796388	0.791646	0.782642	0.780675	0.776558	0.775266	0.770228	0.769415	0.769869	0.768316	0.765766
cngc_cm	0.896908	0.896909	0.900322	0.899169	0.898887	0.901728	0.907837	0.908677	0.908464	0.910539	0.917374	0.917618	0.917651	0.920154	0.917827	0.919807	0.901379	0.885014	0.869178	0.854488	0.846791	0.84175	0.841892	0.834943	0.830808	0.826725	0.824658	0.816795	0.812581	0.805415	0.797579	0.795524	0.788566	0.786903	0.779297	0.778038	0.772385	0.77186	0.767154	0.761959	0.751254
cngc_cm	0.885833	0.889038	0.892418	0.889933	0.891653	0.886237	0.887853	0.890404	0.889491	0.886112	0.886742	0.886128	0.886827	0.886014	0.884524	0.885328	0.881752	0.884173	0.882892	0.882892	0.881329	0.877698	0.871706	0.86877	0.860046	0.853458	0.845269	0.840095	0.829826	0.821813	0.812079	0.803276	0.796897	0.791973	0.788867	0.786449	0.783408	0.773318	0.766545	0.76562	0.761522
cngc_cm	0.892164	0.889577	0.886587	0.889732	0.891584	0.896333	0.898771	0.895401	0.895069	0.88356	0.878561	0.879144	0.88195	0.891034	0.895005	0.893876	0.889003	0.885732	0.880488	0.871135	0.862588	0.855255	0.841893	0.831168	0.822297	0.809019	0.801679	0.790875	0.786623	0.778174	0.771307	0.764612	0.757254	0.752801	0.746787	0.746182	0.741493	0.741243	0.732942	0.733402	0.733154
cngc_cm	0.874404	0.878935	0.886661	0.889194	0.890244	0.896359	0.892148	0.890476	0.89585	0.895105	0.895998	0.900988	0.897468	0.900332	0.89686	0.896671	0.895217	0.894768	0.887155	0.886089	0.883893	0.870222	0.868465	0.860618	0.853917	0.84988	0.844965	0.839178	0.831979	0.824946	0.817493	0.816079	0.814287	0.811386	0.807689	0.806693	0.802602	0.79824	0.797085	0.7973	0.795639
cngc_cm	0.877191	0.879505	0.877496	0.875789	0.875045	0.867373	0.851075	0.875464	0.884952	0.88878	0.886921	0.890046	0.880658	0.873273	0.872731	0.872661	0.868927	0.863978	0.863693	0.856896	0.845022	0.839597	0.833878	0.830068	0.82185	0.815418	0.808267	0.802531	0.794324	0.791173	0.784212	0.779518	0.774383	0.772565	0.768301	0.761798	0.759961	0.757543	0.757177	0.753534	0.751987
cngc_cm	0.881649	0.885401	0.887664	0.88422	0.886093	0.888317	0.890625	0.889853	0.895402	0.889151	0.887778	0.883484	0.885367	0.878133	0.870582	0.867123	0.864026	0.856041	0.845758	0.845398	0.83453	0.829885	0.821537	0.81588	0.806288	0.802352	0.793954	0.787048	0.782305	0.779814	0.779376	0.779562	0.782069	0.779673	0.7749	0.77011	0.771602	0.774712	0.772681	0.776883	0.776053
cngc_cm	0.972825	0.975173	0.982474	0.977904	0.976189	0.974089	0.971249	0.972147	0.970374	0.969274	0.961579	0.959733	0.953405	0.943596	0.945212	0.941779	0.943721	0.945644	0.94119	0.942515	0.942514	0.941263	0.941163	0.940525	0.938042	0.93452	0.932889	0.927529	0.915613	0.905026	0.894958	0.883865	0.874618	0.865882	0.860374	0.848869	0.837431	0.829233	0.824555	0.817276	0.811843
cngc_cm	0.971988	0.974137	0.975339	0.977603	0.977988	0.973164	0.96814	0.960728	0.961527	0.964745	0.965137	0.959941	0.967676	0.961097	0.966024	0.96795	0.962024	0.958012	0.95673	0.949727	0.943212	0.930783	0.923025	0.907901	0.892	0.879789	0.869237	0.856502	0.848941	0.838843	0.828166	0.825948	0.818571	0.813481	0.807115	0.804255	0.804499	0.80274	0.802361	0.797155	0.798962
cngc_cm	0.960794	0.964306	0.965438	0.966612	0.962059	0.966561	0.96248	0.96562	0.965051	0.963299	0.958325	0.953404	0.9534	0.959474	0.963969	0.961906	0.960707	0.9569	0.942105	0.939549	0.931004	0.918986	0.910097	0.905681	0.895682	0.888566	0.878689	0.872375	0.855005	0.847282	0.843026	0.830038	0.826843	0.821926	0.812188	0.803829	0.797931	0.797268	0.797418	0.798918	0.794135
cngc_cm	0.997105	1.00294	0.999294	1.00098	1.00055	1.0017	0.98663	0.975099	0.972388	0.972967	0.96319	0.969957	0.971974	0.969834	0.963914	0.960166	0.959768	0.962339	0.957732	0.950737	0.940231	0.930647	0.924126	0.917748	0.903464	0.896228	0.886824	0.873446	0.863905	0.857162	0.849523	0.841933	0.841797	0.833702	0.825528	0.82115	0.818873	0.817334	0.814328	0.809644	0.809737
cngc_cm	0.959001	0.963935	0.952596	0.948627	0.95424	0.958899	0.960261	0.963416	0.964451	0.95615	0.954441	0.954702	0.958588	0.958327	0.963502	0.962203	0.966487	0.963645	0.96115	0.952104	0.9417	0.932659	0.919435	0.910858	0.898613	0.884115	0.876281	0.868768	0.86102	0.853288	0.848687	0.838528	0.834294	0.822296	0.821079	0.81827	0.811788	0.81005	0.806161	0.809583	0.806323
cngc_cm	0.954832	0.960908	0.961645	0.965466	0.961407	0.961375	0.96367	0.959588	0.96408	0.963962	0.962637	0.963003	0.967205	0.968118	0.971344	0.972175	0.975329	0.971264	0.967296	0.953478	0.95548	0.952889	0.94175	0.930356	0.914724	0.901964	0.886948	0.874597	0.863463	0.855662	0.846401	0.842138	0.837058	0.833557	0.828465	0.824782	0.819654	0.816411	0.812569	0.805316	0.803809
cngc_cm	0.976528	0.980023	0.979592	0.979976	0.981717	0.977918	0.976405	0.973296	0.967683	0.971534	0.97251	0.969619	0.968105	0.976557	0.978221	0.978045	0.972937	0.967749	0.962461	0.955948	0.951123	0.946734	0.934105	0.919372	0.905761	0.891963	0.887428	0.872646	0.861769	0.852719	0.846766	0.842638	0.836269	0.829402	0.82471	0.823135	0.821141	0.814054	0.820441	0.814727	0.813508
cngc_cm	0.977947	0.985534	0.986131	0.984806	0.986392	0.989309	0.984983	0.982499	0.977761	0.979335	0.978813	0.976778	0.973948	0.96734	0.964647	0.969199	0.961916	0.958785	0.957143	0.963671	0.955976	0.947182	0.940101	0.935976	0.926448	0.920094	0.909089	0.904224	0.886337	0.876218	0.870658	0.863919	0.851429	0.84576	0.839546	0.831714	0.825541	0.821581	0.81731	0.810812	0.802617
cngc_cm	1.00428	1.01246	1.01378	1.02289	1.02152	1.02347	1.02889	1.02232	1.02022	1.01341	1.0019	0.997669	0.988486	0.989127	1.00426	1.01496	1.01174	1.00967	1.0006	0.993272	0.989503	0.981722	0.973194	0.964551	0.952232	0.941168	0.931936	0.917024	0.907249	0.891165	0.883145	0.869792	0.859584	0.852907	0.850235	0.839591	0.831313	0.82394	0.82366	0.827291	0.816502
cngc_cm	1.00167	1.00826	1.00812	1.0106	1.01127	1.01457	1.00888	1.0032	0.99629	0.997702	0.994487	0.988202	0.989542	0.982528	0.984378	0.987586	0.984634	0.982	0.977567	0.970244	0.955798	0.943549	0.931803	0.918594	0.907061	0.897182	0.888991	0.87445	0.864206	0.856878	0.850974	0.843946	0.841007	0.831182	0.827599	0.827334	0.824797	0.821818	0.817571	0.815702	0.821385
cngc_cm	1.00152	1.0099	1.00964	1.01004	1.01664	1.0156	1.02055	1.02119	1.01376	1.00472	1.00411	1.00152	0.997066	1.0118	1.01469	1.02143	1.03129	1.02421	1.01609	1.00369	0.993926	0.982738	0.96095	0.951561	0.93843	0.927961	0.916958	0.909977	0.898702	0.889917	0.882473	0.872461	0.860079	0.852455	0.849559	0.83823	0.826748	0.822418	0.818714	0.810497	0.807934
cngc_cm	0.971985	0.973816	0.974829	0.97962	0.978442	0.975912	0.977922	0.983154	0.977188	0.973268	0.965474	0.9581	0.952079	0.952448	0.956065	0.952644	0.947333	0.947147	0.944347	0.94275	0.9423	0.93814	0.9393	0.936786	0.928455	0.925324	0.91721	0.912776	0.900102	0.88993	0.884614	0.873794	0.868654	0.85516	0.846451	0.837165	0.828856	0.822527	0.819822	0.813645	0.81253
cngc_cm	0.961667	0.963009	0.966938	0.974785	0.978123	0.98162	0.98091	0.982725	0.981242	0.977549	0.970555	0.970886	0.97126	0.968208	0.954308	0.93988	0.928034	0.914902	0.900018	0.884655	0.873101	0.856654	0.843395	0.838139	0.828587	0.819498	0.815992	0.811223	0.808697	0.80463	0.797503	0.796449	0.79508	0.798926	0.792767	0.79923	0.798203	0.798085	0.799141
cngc_cm	0.959688	0.966356	0.967599	0.968742	0.969058	0.969779	0.969685	0.964215	0.962785	0.958417	0.954314	0.953422	0.948999	0.952359	0.950368	0.94817	0.947088	0.942297	0.939307	0.940052	0.934901	0.929086	0.930297	0.922729	0.913832	0.909048	0.89959	0.892505	0.885887	0.874009	0.865688	0.857906	0.847945	0.844646	0.837447	0.838703	0.826161	0.817505	0.809395	0.803947	0.800001
cngc_cm	0.963558	0.97247	0.968283	0.974601	0.980447	0.976935	0.980941	0.978234	0.975328	0.968204	0.961289	0.958282	0.958073	0.954996	0.951335	0.950066	0.942793	0.940866	0.933263	0.933113	0.931301	0.929953	0.926727	0.92407	0.918466	0.906393	0.899778	0.893922	0.890266	0.885705	0.876917	0.866521	0.85894	0.861755	0.85948	0.850858	0.843851	0.838658	0.831524	0.821529	0.81605
cngc_cm	0.967839	0.966873	0.970145	0.976724	0.979677	0.982839	0.982459	0.98174	0.979043	0.977396	0.981097	0.977926	0.971258	0.966603	0.96898	0.965334	0.966706	0.95612	0.948413	0.936478	0.92574	0.915649	0.90645	0.895844	0.886051	0.874875	0.864643	0.857671	0.851052	0.840901	0.83891	0.83531	0.832707	0.830696	0.826843	0.828095	0.819759	0.818573	0.821029	0.820743	0.82088
cngc_cm	0.959475	0.96133	0.959758	0.96395	0.966958	0.965026	0.957218	0.953649	0.950418	0.944986	0.945881	0.938023	0.929862	0.919818	0.917863	0.914881	0.925354	0.924167	0.927251	0.921112	0.919831	0.913	0.903983	0.893875	0.879087	0.87341	0.861021	0.853843	0.843899	0.83282	0.823787	0.817442	0.810338	0.80387	0.801754	0.790948	0.78834	0.785627	0.783907	0.78203	0.780819
cngc_cm	0.943082	0.946639	0.942712	0.944138	0.946236	0.945273	0.945655	0.935889	0.933855	0.933954	0.934822	0.925416	0.92297	0.92212	0.914695	0.913119	0.9102	0.911021	0.907804	0.905388	0.900065	0.895254	0.888084	0.888912	0.880535	0.867495	0.861587	0.852202	0.846437	0.838165	0.831751	0.823043	0.8146	0.806973	0.801989	0.799459	0.793087	0.78514	0.784366	0.781252	0.779262
cngc_cm	0.969632	0.970917	0.97469	0.974814	0.972643	0.973265	0.97488	0.984777	0.996116	1.00202	1.01651	1.01145	1.01506	1.01796	1.01563	1.01489	0.998902	0.987252	0.977846	0.965533	0.953863	0.937147	0.92577	0.915692	0.904327	0.89361	0.878945	0.873024	0.866918	0.858699	0.853005	0.841585	0.834191	0.829119	0.819128	0.810616	0.811788	0.806311	0.805219	0.796722	0.795764
cngc_cm	0.95946	0.968555	0.967307	0.952841	0.956749	0.952535	0.960308	0.966198	0.958602	0.957608	0.946464	0.940355	0.943133	0.951362	0.950667	0.949944	0.947749	0.940468	0.935603	0.930826	0.92524	0.917926	0.910287	0.901196	0.895223	0.883484	0.874713	0.866122	0.856982	0.850095	0.836801	0.830862	0.828071	0.81812	0.809652	0.804536	0.804098	0.8018	0.797549	0.795256	0.792286
cngc_cm	0.958822	0.957233	0.960821	0.967828	0.962942	0.963806	0.962952	0.963973	0.966616	0.968286	0.97025	0.971528	0.975099	0.977795	0.978176	0.988884	0.996829	0.997333	0.99964	0.996039	0.995309	0.992903	0.987254	0.972458	0.959029	0.950989	0.941924	0.936297	0.923717	0.919386	0.912774	0.904341	0.898052	0.890328	0.885427	0.876588	0.870339	0.863756	0.859606	0.851135	0.84559
cngc_cm	0.959566	0.96739	0.971444	0.967006	0.967589	0.969367	0.971493	0.969085	0.967461	0.965633	0.963127	0.961325	0.964136	0.971211	0.976505	0.981555	0.985427	0.989042	0.986732	0.987372	0.981254	0.971985	0.96841	0.952757	0.948502	0.9405	0.933758	0.926614	0.918047	0.910827	0.899176	0.893217	0.884122	0.875271	0.866083	0.861273	0.8519	0.84586	0.838517	0.836752	0.833353
cngc_cm	0.968511	0.975083	0.971895	0.975761	0.977533	0.980387	0.980242	0.975611	0.974366	0.972657	0.968931	0.967314	0.970184	0.9722	0.972925	0.974103	0.973421	0.965492	0.962842	0.970039	0.967946	0.960833	0.962171	0.963306	0.951188	0.940553	0.928494	0.915647	0.909471	0.898522	0.885187	0.876147	0.863817	0.856181	0.846198	0.83592	0.82957	0.820445	0.816136	0.811711	0.806322
cngc_cm	0.949106	0.9552	0.956771	0.952116	0.951798	0.950825	0.949321	0.944769	0.939999	0.935768	0.936662	0.931078	0.933117	0.929953	0.926018	0.91896	0.916674	0.917718	0.922531	0.91773	0.919112	0.920472	0.912246	0.907181	0.896633	0.891565	0.878819	0.869123	0.862966	0.856355	0.844127	0.837745	0.831555	0.825351	0.81939	0.822296	0.812364	0.804987	0.805097	0.802807	0.80162
cngc_cm	0.958045	0.962341	0.961947	0.96345	0.961307	0.960219	0.96165	0.966002	0.959972	0.956034	0.951954	0.953557	0.957209	0.957564	0.958797	0.953065	0.948823	0.946374	0.939787	0.931996	0.924869	0.91996	0.913701	0.897076	0.893453	0.889283	0.88168	0.872766	0.863606	0.854184	0.853054	0.841652	0.831725	0.828829	0.823562	0.827665	0.82252	0.821385	0.819025	0.811364	0.81215
cngc_cm	0.946078	0.942745	0.952395	0.949175	0.952124	0.952258	0.953467	0.947575	0.947738	0.948469	0.945332	0.940567	0.940574	0.9395	0.937166	0.933163	0.93636	0.940118	0.940689	0.93729	0.934842	0.929772	0.924219	0.917437	0.910533	0.901398	0.892621	0.886419	0.873651	0.870818	0.861106	0.860352	0.852309	0.846126	0.841758	0.837394	0.831733	0.821809	0.816942	0.813421	0.811044
cngc_cm	0.948396	0.948075	0.949772	0.948953	0.942218	0.946337	0.943129	0.938338	0.935609	0.937535	0.924513	0.92392	0.922489	0.920832	0.924319	0.921026	0.921469	0.920693	0.920568	0.922064	0.91736	0.913418	0.907197	0.904548	0.895855	0.892379	0.879396	0.875494	0.868523	0.856793	0.845343	0.836314	0.831657	0.825036	0.82195	0.814815	0.81439	0.81	0.808133	0.806958	0.806852
cngc_cm	0.983134	0.984696	0.98859	0.994865	0.995641	0.994499	0.993483	0.995858	0.994209	0.992557	0.984246	0.979694	0.973816	0.971946	0.971026	0.96695	0.966484	0.959451	0.960539	0.958646	0.957519	0.957949	0.959526	0.954645	0.958695	0.958354	0.955233	0.943455	0.935286	0.925957	0.920053	0.91751	0.909867	0.901776	0.894437	0.884245	0.86672	0.858341	0.853959	0.849839	0.84992
cngc_cm	0.960572	0.960123	0.96485	0.967996	0.964792	0.960494	0.964806	0.964916	0.961982	0.962936	0.964257	0.954339	0.958471	0.960458	0.959001	0.959495	0.956551	0.952082	0.947605	0.942578	0.939649	0.927973	0.912982	0.90562	0.887068	0.879154	0.873766	0.863771	0.859294	0.849334	0.84259	0.833593	0.83337	0.832688	0.833626	0.82678	0.825461	0.821293	0.82023	0.820988	0.82126
cngc_cm	0.950986	0.954105	0.953068	0.961715	0.959956	0.954802	0.952476	0.952497	0.951064	0.947137	0.942208	0.940407	0.941827	0.937979	0.939748	0.943534	0.947527	0.946331	0.95057	0.944847	0.941016	0.917329	0.908281	0.908077	0.899638	0.891206	0.889133	0.884175	0.876202	0.869788	0.860784	0.857353	0.854192	0.841	0.830993	0.832032	0.824626	0.826994	0.839258	0.828186	0.820694
cngcomp_cm	0.993511	0.997511	1.00572	1.0061	1.01725	1.02446	1.03035	1.04176	1.0535	1.05758	1.07219	1.08479	1.09811	1.11184	1.13429	1.14945	1.16586	1.17091	1.17178	1.16783	1.1477	1.12485	1.1072	1.07816	1.05018	1.01688	0.990823	0.967207	0.94384	0.925335	0.916392	0.910042	0.90095	0.893386	0.884579	0.875738	0.85555	0.852576	0.849921	0.852146	0.844521
cngcomp_cm	1.00816	1.02244	1.03192	1.04472	1.05206	1.05939	1.07203	1.08478	1.09036	1.10594	1.12077	1.13345	1.14904	1.14722	1.13675	1.11328	1.07691	1.06325	1.08148	1.0713	1.03062	0.998621	0.96724	0.943081	0.928595	0.912586	0.899564	0.889522	0.886436	0.878149	0.868982	0.862422	0.861996	0.861046	0.857076	0.852964	0.849989	0.845525	0.846008	0.841439	0.837672
cngcomp_cm	0.998069	1.00096	1.0115	1.02168	1.02749	1.03791	1.04855	1.04529	1.03841	1.05994	1.06887	1.07929	1.09932	1.11428	1.1315	1.14624	1.15181	1.1462	1.14067	1.12236	1.0945	1.06463	1.04004	1.01226	0.982706	0.961431	0.93917	0.920895	0.909936	0.89899	0.888473	0.881137	0.879496	0.871359	0.865101	0.86023	0.853443	0.847079	0.84016	0.836118	0.829251
cngcomp_cm	0.998876	1.00082	1.00731	1.01633	1.01943	1.03282	1.03374	1.03773	1.05437	1.06077	1.07333	1.08456	1.09803	1.11646	1.12532	1.13663	1.1472	1.14393	1.12756	1.10677	1.07845	1.04918	1.01975	0.991291	0.965218	0.945777	0.926382	0.911318	0.905139	0.893762	0.88183	0.868349	0.863867	0.857158	0.852609	0.843646	0.837853	0.833442	0.823289	0.815339	0.810468
cngcomp_cm	1.01476	1.01237	1.01805	1.02148	1.03597	1.05084	1.06034	1.06855	1.08333	1.09469	1.10618	1.12106	1.1264	1.13873	1.13414	1.12272	1.10789	1.07871	1.04663	1.01935	0.990667	0.962518	0.947464	0.932968	0.92247	0.910903	0.906081	0.901209	0.896305	0.893933	0.886795	0.885962	0.882521	0.877523	0.874662	0.875554	0.870331	0.862482	0.862131	0.855471	0.856663
cngcomp_cm	1.04564	1.04719	1.04561	1.04978	1.06403	1.08132	1.10946	1.12339	1.13155	1.12767	1.14308	1.15948	1.17732	1.19598	1.20335	1.21438	1.20638	1.19615	1.17189	1.14568	1.1231	1.0923	1.06521	1.03982	1.01915	0.998785	0.986297	0.969172	0.957561	0.946324	0.936677	0.934459	0.92282	0.920324	0.91106	0.906682	0.89596	0.888414	0.889953	0.890073	0.886393
cngcomp_cm	1.05299	1.05699	1.0664	1.07662	1.07793	1.08981	1.08666	1.08057	1.08945	1.10013	1.12031	1.14223	1.16442	1.17522	1.18503	1.19292	1.19273	1.18393	1.16396	1.13894	1.11107	1.08597	1.06004	1.0407	1.02202	1.00039	0.97808	0.962593	0.94739	0.941161	0.929109	0.922719	0.91681	0.908593	0.903518	0.892107	0.891755	0.884013	0.88411	0.886581	0.885013
cngcomp_cm	1.02096	1.02356	1.02919	1.03487	1.03929	1.04815	1.05298	1.06028	1.05986	1.05766	1.09686	1.12121	1.13338	1.14199	1.16053	1.17329	1.17358	1.17377	1.14069	1.10795	1.07393	1.03441	1.00056	0.975796	0.956087	0.936648	0.9174	0.907586	0.897168	0.885023	0.885609	0.881709	0.879251	0.87391	0.860569	0.86065	0.858176	0.847979	0.846024	0.842899	0.836552
cngcomp_cm	1.05142	1.05563	1.06496	1.07176	1.08165	1.09392	1.10834	1.11959	1.12806	1.13457	1.14963	1.162	1.17445	1.17741	1.17915	1.18821	1.18805	1.18442	1.18235	1.1608	1.12042	1.08406	1.05641	1.0306	1.00441	0.984699	0.965799	0.952881	0.94192	0.932979	0.93013	0.922547	0.909948	0.907393	0.906126	0.903101	0.901652	0.889924	0.881228	0.878579	0.873947
cngcomp_cm	1.06322	1.05849	1.06784	1.06395	1.06908	1.09161	1.10058	1.11138	1.11882	1.12857	1.12984	1.1485	1.15427	1.16905	1.17546	1.17955	1.17325	1.16175	1.14325	1.11603	1.08355	1.04852	1.0255	1.00285	0.981211	0.965402	0.952504	0.942308	0.933127	0.930296	0.925613	0.916217	0.90823	0.898961	0.892759	0.894114	0.893754	0.890849	0.883442	0.884874	0.881493
cngcomp_cm	0.906458	0.906288	0.912119	0.918758	0.931985	0.942678	0.955755	0.968005	0.980474	0.990604	1.00468	1.01813	1.02855	1.04414	1.0605	1.07134	1.08171	1.08732	1.08886	1.08432	1.07731	1.06086	1.02961	1.0032	0.970559	0.945034	0.91741	0.892818	0.875189	0.855906	0.843692	0.835081	0.824653	0.81344	0.80203	0.798119	0.791389	0.78747	0.7817	0.774041	0.767268
cngcomp_cm	0.893552	0.895446	0.901645	0.905375	0.914367	0.923229	0.925363	0.936896	0.949431	0.952889	0.962163	0.979572	0.989956	1.00812	1.02689	1.04271	1.05699	1.05349	1.06766	1.06504	1.05781	1.0408	1.0188	0.991447	0.965674	0.93788	0.908265	0.884063	0.864862	0.851072	0.84163	0.832133	0.829069	0.821919	0.817239	0.807786	0.79996	0.79369	0.791526	0.78837	0.782775
cngcomp_cm	0.901575	0.901244	0.906857	0.910343	0.912584	0.918203	0.923481	0.939729	0.943412	0.955422	0.959212	0.938261	0.94208	0.950548	0.967049	1.01056	1.03749	1.04289	1.03456	1.01858	0.993339	0.966555	0.937451	0.911357	0.890898	0.867991	0.849782	0.837189	0.82595	0.817728	0.806683	0.801753	0.795194	0.788361	0.78365	0.782285	0.784906	0.779642	0.776171	0.775748	0.77086
cngcomp_cm	0.90126	0.90347	0.906115	0.909994	0.919675	0.92715	0.940211	0.951754	0.966577	0.979741	0.989644	1.00186	1.01224	1.0154	1.01541	1.02586	1.02459	1.01105	0.980613	0.949197	0.913128	0.884307	0.857349	0.838617	0.828903	0.814586	0.807861	0.79819	0.790366	0.787923	0.781049	0.779029	0.776548	0.771476	0.76553	0.763963	0.764587	0.762509	0.759264	0.754304	0.752643
cngcomp_cm	0.884233	0.890157	0.894743	0.894481	0.897864	0.902327	0.905155	0.915982	0.926067	0.944476	0.95848	0.965123	0.975544	0.986879	0.999333	1.00324	1.01551	1.02006	1.03164	1.02229	1.00886	0.985574	0.961063	0.9389	0.915181	0.892821	0.869361	0.850789	0.833979	0.821642	0.806629	0.798661	0.792741	0.78473	0.785605	0.782463	0.777384	0.774586	0.771633	0.772297	0.765006
cngcomp_cm	0.915079	0.922017	0.923852	0.927392	0.931307	0.935563	0.944762	0.951727	0.956245	0.967081	0.97813	0.98597	0.998092	1.00864	1.01692	1.02998	1.04243	1.04584	1.05227	1.06268	1.05414	1.02443	1.02374	1.00759	0.982075	0.960072	0.937359	0.917425	0.895231	0.87853	0.857194	0.845951	0.838112	0.827166	0.818932	0.81621	0.808506	0.801943	0.797761	0.794028	0.79441
cngcomp_cm	0.905992	0.910715	0.909548	0.911447	0.910785	0.90502	0.910115	0.917073	0.939245	0.949743	0.967576	0.981826	0.995693	1.01059	1.02987	1.03874	1.04633	1.04296	1.03895	1.02419	1.00627	0.979439	0.947154	0.913757	0.885506	0.859543	0.84351	0.829977	0.821593	0.81341	0.8012	0.79436	0.792257	0.788788	0.782375	0.782915	0.77784	0.774316	0.770717	0.764792	0.761039
cngcomp_cm	0.903103	0.902277	0.888996	0.889025	0.901482	0.908293	0.914984	0.929436	0.939182	0.945862	0.951121	0.955491	0.950699	0.956693	0.953996	0.948362	0.937853	0.915579	0.893932	0.865704	0.833683	0.808824	0.79201	0.779714	0.766744	0.763348	0.763398	0.753941	0.751249	0.746595	0.737305	0.728471	0.722218	0.72788	0.725432	0.722867	0.721808	0.725901	0.730705	0.730828	0.734756
cngcomp_cm	0.882925	0.894435	0.904586	0.907212	0.91193	0.904312	0.916094	0.948869	0.958675	0.962671	0.948519	0.942162	0.922878	0.902614	0.885262	0.866443	0.839182	0.813134	0.794828	0.776528	0.772352	0.768918	0.758815	0.757285	0.754654	0.749369	0.751124	0.7472	0.751469	0.752222	0.754344	0.763269	0.771538	0.775802	0.779659	0.774604	0.783007	0.783809	0.787514	0.786342	0.775874
cngcomp_cm	1.01303	1.02259	1.03179	1.03715	1.04484	1.05464	1.06388	1.07903	1.08613	1.09727	1.10673	1.12633	1.14261	1.15352	1.15965	1.14704	1.1321	1.10646	1.06751	1.03157	0.991006	0.95822	0.930617	0.915737	0.901584	0.89052	0.883069	0.87583	0.872159	0.865998	0.862078	0.860457	0.864243	0.861773	0.862038	0.862942	0.866679	0.866754	0.868587	0.875462	0.876775
cngcomp_cm	1.03011	1.0363	1.03985	1.04932	1.05933	1.06486	1.07639	1.08252	1.09943	1.11509	1.12564	1.14012	1.16103	1.18787	1.19689	1.20116	1.21409	1.22717	1.21014	1.19054	1.16544	1.13541	1.10009	1.04827	1.00521	0.983613	0.962566	0.945136	0.933501	0.922302	0.914596	0.910311	0.903178	0.897481	0.894844	0.88737	0.886549	0.881793	0.883183	0.886724	0.885728
cngcomp_cm	1.03714	1.0399	1.045	1.04449	1.05078	1.05663	1.06947	1.08415	1.09919	1.1185	1.12386	1.1155	1.12688	1.14427	1.14274	1.13429	1.11564	1.09263	1.05777	1.02797	0.999635	0.977418	0.959456	0.947725	0.933294	0.926864	0.920534	0.915455	0.918898	0.905731	0.904987	0.9005	0.901625	0.896448	0.894354	0.89367	0.89184	0.892363	0.88947	0.890636	0.900265
cngcomp_cm	1.12204	1.12967	1.13839	1.14417	1.1498	1.15348	1.16556	1.1776	1.19174	1.22192	1.25678	1.28142	1.3096	1.33091	1.35018	1.36239	1.36388	1.35251	1.334	1.30191	1.27106	1.23815	1.20505	1.18033	1.15288	1.12992	1.11518	1.09193	1.07717	1.06614	1.06225	1.05729	1.05235	1.04314	1.04397	1.04618	1.04141	1.03659	1.03077	1.02882	1.01874
cngcomp_cm	0.991944	0.999532	1.01314	1.02167	1.02619	1.03481	1.04778	1.06378	1.07778	1.08702	1.10001	1.11175	1.13289	1.14838	1.15204	1.1576	1.14089	1.12598	1.09542	1.07094	1.03757	1.00966	0.98699	0.96946	0.948974	0.933057	0.923043	0.91287	0.904282	0.894759	0.889884	0.883817	0.880591	0.877334	0.879316	0.875951	0.868104	0.867039	0.86438	0.868659	0.869089
cngcomp_cm	0.962173	0.962034	0.960236	0.958008	0.967441	0.974403	0.98415	1.00081	1.01757	1.03712	1.05386	1.07335	1.07817	1.08181	1.07626	1.05671	1.03082	1.0002	0.97415	0.94439	0.925171	0.914314	0.901661	0.891873	0.87756	0.86786	0.86234	0.853328	0.849748	0.849779	0.853365	0.852346	0.851842	0.852457	0.85669	0.864061	0.868959	0.872704	0.868711	0.868085	0.870097
cngcomp_cm	0.990182	0.996101	0.990007	0.993821	1.00567	1.0142	1.01697	1.02567	1.03321	1.03909	1.04413	1.05903	1.07299	1.08738	1.09802	1.10073	1.08693	1.054	1.0183	0.985929	0.963214	0.939143	0.921728	0.907213	0.895079	0.886716	0.883879	0.878212	0.872947	0.875208	0.872369	0.873	0.873989	0.872262	0.874937	0.872566	0.872943	0.868368	0.872945	0.881635	0.887095
cngcomp_cm	0.989873	0.99313	1.00115	1.01274	1.01845	1.02618	1.0335	1.0402	1.05318	1.06837	1.07947	1.09305	1.10459	1.11889	1.118	1.11729	1.11628	1.10748	1.088	1.06105	1.0287	0.99736	0.972598	0.943614	0.92417	0.902574	0.888936	0.879351	0.871826	0.869282	0.865129	0.862685	0.85159	0.849015	0.843315	0.845734	0.842101	0.838181	0.840513	0.84116	0.837908
cngcomp_cm	0.967742	0.967905	0.966802	0.970977	0.970725	0.97262	0.975925	0.984411	0.990197	0.991211	1.00913	1.01788	1.03978	1.05056	1.05973	1.0694	1.07648	1.07023	1.05515	1.03074	1.00412	0.976759	0.953205	0.927285	0.913998	0.898546	0.884859	0.873421	0.860286	0.85516	0.848875	0.837986	0.834583	0.830637	0.827018	0.81724	0.815428	0.81269	0.815611	0.808538	0.804203
cngcomp_cm	0.986549	0.993365	1.00331	1.01096	1.02004	1.02828	1.03778	1.04525	1.05512	1.06614	1.0873	1.09598	1.09186	1.09165	1.08041	1.06379	1.04611	1.02819	1.01076	0.994025	0.96719	0.93974	0.914735	0.895905	0.882822	0.873543	0.866276	0.864338	0.858094	0.851968	0.844697	0.844392	0.839501	0.835074	0.832194	0.825241	0.81818	0.815235	0.813571	0.805088	0.802905
cngcomp_cm	0.998042	1.00491	1.00438	1.0128	1.01834	1.03135	1.0407	1.05388	1.06556	1.07608	1.08942	1.10812	1.1076	1.1071	1.1303	1.14069	1.12995	1.14831	1.15488	1.13137	1.09862	1.07365	1.04702	1.02374	0.997362	0.978428	0.964107	0.950116	0.939263	0.928547	0.920114	0.907802	0.89855	0.889966	0.885878	0.881387	0.873959	0.86666	0.864248	0.859815	0.857088
cngcomp_cm	0.992709	0.9949	0.999893	1.00229	1.00345	1.0154	1.02429	1.02945	1.03776	1.04796	1.06514	1.07722	1.08919	1.10258	1.11462	1.12691	1.13372	1.13577	1.13695	1.13256	1.11779	1.10168	1.07473	1.04263	1.01698	0.984561	0.963191	0.942787	0.929348	0.914	0.902901	0.893316	0.886471	0.874068	0.869919	0.861589	0.856023	0.853612	0.849749	0.848314	0.849678
cngcomp_cm	0.990021	1.00147	1.00032	1.0042	1.01543	1.02517	1.02741	1.03304	1.03754	1.04957	1.05742	1.07717	1.0921	1.10635	1.11287	1.11076	1.10429	1.10266	1.08549	1.071	1.05233	1.02486	1.00624	0.985214	0.96754	0.94992	0.93454	0.927807	0.919564	0.911787	0.906979	0.899075	0.887618	0.887865	0.883658	0.874986	0.870246	0.863133	0.864962	0.85631	0.853838
cngcomp_cm	0.999607	1.00315	1.00388	1.01021	1.01422	1.01868	1.02011	1.03183	1.04642	1.05955	1.06653	1.07643	1.0862	1.10237	1.10954	1.1113	1.10672	1.103	1.08694	1.06518	1.03587	1.01629	1.00445	0.980932	0.965302	0.951588	0.939188	0.922046	0.916673	0.908524	0.907997	0.899827	0.893699	0.890382	0.8842	0.883741	0.878752	0.877386	0.871849	0.873057	0.86814
col_iaa	1.10051	1.10779	1.10967	1.11277	1.12111	1.12651	1.13732	1.13949	1.15112	1.15318	1.15918	1.17227	1.18379	1.18326	1.1679	1.17314	1.17471	1.17789	1.18006	1.17518	1.16557	1.15191	1.1393	1.13121	1.12147	1.11306	1.10516	1.08667	1.07977	1.06838	1.05596	1.04712	1.03448	1.02488	1.01617	0.999645	0.996985	0.993296	0.986792	0.983303	0.975446
col_iaa	1.0369	1.04171	1.04488	1.05072	1.05856	1.0677	1.0794	1.08864	1.0953	1.10467	1.11444	1.11982	1.12732	1.1347	1.13665	1.13861	1.13334	1.12008	1.11859	1.11386	1.09807	1.08153	1.07777	1.06562	1.06063	1.0471	1.03634	1.02673	1.02298	1.01502	1.00782	0.996646	0.991993	0.986448	0.984914	0.979729	0.966894	0.969372	0.964552	0.962593	0.955235
col_iaa	1.01737	1.03098	1.03426	1.03611	1.04003	1.04735	1.05751	1.05943	1.06656	1.07193	1.07701	1.08752	1.10535	1.12028	1.12981	1.13776	1.14781	1.1492	1.13963	1.12637	1.11339	1.10363	1.0884	1.06529	1.05465	1.04215	1.03478	1.02439	1.01502	1.00614	1.00134	0.995043	0.988799	0.981375	0.979489	0.975969	0.971025	0.964774	0.958186	0.953075	0.949505
col_iaa	1.0282	1.03673	1.04233	1.04917	1.05992	1.06968	1.07127	1.04925	1.05785	1.06154	1.06689	1.11188	1.12297	1.13444	1.14816	1.16138	1.17431	1.18026	1.1853	1.18682	1.17888	1.17545	1.16062	1.14126	1.12464	1.10617	1.09931	1.08393	1.06916	1.06629	1.05144	1.04029	1.03157	1.02432	1.01246	1.00812	1.00131	0.992622	0.985695	0.983064	0.980994
col_iaa	1.0438	1.03978	1.0534	1.05652	1.04936	1.03763	1.05006	1.07308	1.07774	1.08953	1.11129	1.1265	1.12832	1.14422	1.1549	1.16265	1.17667	1.18314	1.18697	1.18842	1.18613	1.17273	1.15557	1.14431	1.13327	1.11849	1.10638	1.09978	1.07916	1.06992	1.06103	1.05468	1.04726	1.04147	1.0359	1.02979	1.02086	1.01633	1.01507	1.00781	1.00282
col_iaa	1.03023	1.03404	1.04041	1.04246	1.04314	1.06662	1.08608	1.0939	1.09371	1.08672	1.11419	1.12789	1.14414	1.15626	1.17213	1.19061	1.2019	1.2183	1.23813	1.24469	1.24584	1.23743	1.21399	1.19003	1.1743	1.15224	1.13788	1.1228	1.10984	1.09405	1.08263	1.07208	1.06373	1.05151	1.04685	1.04005	1.03737	1.0304	1.02659	1.02586	1.01907
col_iaa	1.03776	1.04143	1.04448	1.0477	1.04859	1.05229	1.06331	1.05645	1.05729	1.06808	1.07442	1.08679	1.07979	1.07848	1.08146	1.08402	1.08996	1.09138	1.09772	1.1061	1.10411	1.10066	1.10003	1.08772	1.08063	1.07237	1.0714	1.06215	1.06203	1.05789	1.05096	1.04942	1.04213	1.03902	1.03611	1.03356	1.03051	1.0217	1.01456	1.01056	1.00741
col_iaa	1.04413	1.04797	1.04841	1.05698	1.06602	1.07357	1.0778	1.08627	1.09317	1.10446	1.10814	1.11224	1.12347	1.12608	1.13894	1.1483	1.15242	1.16311	1.17726	1.18891	1.19241	1.19035	1.184	1.17589	1.16319	1.15019	1.13844	1.13005	1.11838	1.10871	1.09751	1.0871	1.07984	1.06954	1.05964	1.05727	1.04939	1.04852	1.04545	1.03821	1.03262
col_iaa	1.03359	1.04374	1.04798	1.05098	1.06036	1.05651	1.05658	1.06695	1.0682	1.08801	1.10532	1.12975	1.13726	1.1495	1.15396	1.16172	1.16837	1.16654	1.16327	1.15215	1.14058	1.12896	1.11222	1.09843	1.08774	1.07333	1.06449	1.05651	1.05079	1.04472	1.03956	1.03954	1.03771	1.0305	1.02571	1.02366	1.02012	1.02446	1.02143	1.01446	1.01128
col_iaa	1.03282	1.03767	1.04263	1.04399	1.05019	1.06127	1.06501	1.06828	1.07411	1.08107	1.08231	1.0985	1.1087	1.13074	1.14513	1.15038	1.16174	1.17673	1.18626	1.19062	1.19401	1.19485	1.18932	1.17975	1.16748	1.15079	1.1374	1.11718	1.10089	1.08844	1.07863	1.06854	1.05123	1.04901	1.04534	1.03784	1.03678	1.03433	1.02943	1.02238	1.02027
col_iaa	1.00088	1.00791	1.00802	1.015	1.02733	1.02911	1.04448	1.04595	1.0529	1.05265	1.05241	1.05668	1.06217	1.06569	1.07339	1.07851	1.08249	1.08622	1.08913	1.09135	1.09103	1.08302	1.0739	1.06034	1.04122	1.02092	1.00002	0.991432	0.968818	0.951882	0.93634	0.921257	0.915284	0.905276	0.89379	0.889539	0.891443	0.886141	0.876501	0.878159	0.87134
col_iaa	0.940849	0.938608	0.933719	0.926088	0.913932	0.887129	0.912846	0.919645	0.923071	0.940523	0.950588	0.961196	0.964872	0.972203	0.975391	0.979525	0.980652	0.975403	0.966484	0.949795	0.935412	0.925905	0.905272	0.888136	0.87184	0.858381	0.848699	0.84487	0.839034	0.835713	0.828513	0.823126	0.819961	0.813441	0.812031	0.811995	0.814873	0.810975	0.816339	0.816504	0.812724
col_iaa	0.953839	0.956439	0.961366	0.967831	0.96734	0.977774	0.985126	0.98386	0.968422	0.977369	0.977937	0.984282	1.00502	1.03158	1.03704	1.04607	1.05616	1.05215	1.05255	1.05423	1.04972	1.03445	1.01767	1.00205	0.986127	0.971864	0.961849	0.953672	0.945164	0.939488	0.924874	0.918854	0.91341	0.901339	0.900396	0.892661	0.891943	0.886092	0.881122	0.872909	0.873712
col_iaa	0.974967	0.97159	0.968445	0.978258	0.979674	0.97845	0.999128	1.01086	1.01627	1.02297	1.02488	1.02725	1.03433	1.04128	1.05329	1.06146	1.07085	1.07573	1.08178	1.08009	1.06863	1.05929	1.04582	1.03184	1.02221	1.00715	0.994854	0.983756	0.975539	0.962843	0.957888	0.952023	0.943908	0.941502	0.936827	0.931738	0.922552	0.922336	0.922274	0.918317	0.917632
col_iaa	0.927659	0.928663	0.935573	0.936358	0.94169	0.943447	0.952067	0.960663	0.962999	0.957075	0.964044	0.961055	0.95893	0.975783	1.00972	1.03038	1.04334	1.06244	1.07122	1.07162	1.06886	1.062	1.05338	1.04341	1.02705	1.01428	0.99593	0.986764	0.977717	0.969613	0.961852	0.950722	0.941103	0.924143	0.91507	0.904993	0.900574	0.892404	0.886225	0.88743	0.875139
col_iaa	0.969325	0.971282	0.975632	0.97721	0.985355	0.986663	0.978012	0.970472	0.975079	1.00335	1.01911	1.03256	1.04956	1.06046	1.07262	1.08392	1.09587	1.10402	1.10754	1.10658	1.09784	1.09156	1.07053	1.05647	1.04	1.02633	1.01535	1.00516	0.994147	0.989305	0.978074	0.969922	0.962605	0.961048	0.956797	0.950646	0.949272	0.940835	0.933611	0.93828	0.93549
col_iaa	0.947463	0.956878	0.955268	0.960099	0.95873	0.964357	0.978501	0.985063	0.988793	1.00187	1.01455	1.01463	0.99813	1.00318	0.998211	0.992572	0.986416	0.98079	0.971924	0.965753	0.957583	0.950177	0.945417	0.940009	0.930202	0.921849	0.91229	0.905157	0.90306	0.898214	0.891806	0.883952	0.879936	0.876518	0.873223	0.874936	0.871019	0.867634	0.868985	0.867139	0.863931
col_iaa	0.951033	0.95895	0.967001	0.97057	0.984346	0.987148	0.993202	1.00153	1.00729	1.01618	1.02545	1.03396	1.04922	1.0566	1.06784	1.07651	1.08837	1.09724	1.09315	1.09519	1.08748	1.07241	1.05385	1.03482	1.02092	1.00694	0.990265	0.975975	0.966163	0.957652	0.955745	0.944315	0.9403	0.940558	0.935772	0.925005	0.919471	0.915559	0.91074	0.912515	0.907013
col_iaa	0.92112	0.927888	0.931277	0.931376	0.947243	0.953908	0.965406	0.975267	0.980903	0.988078	0.992423	0.997802	1.00663	1.01731	1.02812	1.04193	1.0568	1.07564	1.0963	1.10442	1.11295	1.11423	1.10288	1.09665	1.08961	1.07667	1.05876	1.04589	1.03104	1.01216	0.992425	0.980605	0.967865	0.959198	0.949701	0.946437	0.94378	0.938378	0.937482	0.940086	0.93743
col_iaa	1.07952	1.08546	1.08759	1.09027	1.09265	1.09526	1.09733	1.10086	1.10104	1.10471	1.10374	1.10611	1.11818	1.1262	1.13906	1.14942	1.15839	1.16385	1.1622	1.16053	1.15441	1.14723	1.1423	1.13008	1.11284	1.09271	1.06675	1.05019	1.02528	1.00417	0.980246	0.977473	0.965527	0.95965	0.948753	0.940384	0.938019	0.931969	0.921698	0.914769	0.904614
col_iaa	1.05963	1.05943	1.06531	1.06737	1.07263	1.07641	1.07512	1.07713	1.08091	1.08274	1.07706	1.08201	1.08725	1.0977	1.10693	1.11603	1.12322	1.13018	1.14333	1.15148	1.15737	1.15564	1.15337	1.14396	1.13474	1.11806	1.1036	1.09479	1.08266	1.06433	1.0542	1.0378	1.02581	1.01272	0.999228	0.98775	0.974074	0.966805	0.953591	0.943924	0.940151
col_iaa	1.05246	1.05857	1.05935	1.07085	1.07146	1.07591	1.08216	1.08335	1.089	1.09307	1.1067	1.12003	1.13982	1.14661	1.1698	1.1698	1.17555	1.16983	1.16652	1.16679	1.15337	1.13308	1.12155	1.10272	1.07512	1.05758	1.03617	1.02198	1.0083	0.995132	0.985949	0.973651	0.965472	0.959682	0.950113	0.946799	0.941544	0.930543	0.927218	0.924452	0.923759
col_iaa	1.03888	1.05158	1.06217	1.06539	1.07284	1.08295	1.09124	1.10325	1.1101	1.11866	1.12405	1.11603	1.12366	1.14112	1.15944	1.16469	1.17051	1.17277	1.16694	1.15769	1.13939	1.11427	1.10038	1.08408	1.06742	1.05239	1.03624	1.02058	1.00466	0.988694	0.980353	0.971717	0.962352	0.950177	0.946342	0.937122	0.927337	0.916804	0.910922	0.903389	0.89756
col_iaa	1.05332	1.06332	1.0711	1.07784	1.08306	1.09058	1.09278	1.10217	1.10195	1.11045	1.12062	1.12403	1.13238	1.14533	1.15404	1.16268	1.17033	1.17479	1.16823	1.15845	1.13614	1.12075	1.1013	1.08369	1.06897	1.05798	1.04055	1.02751	1.01186	1.00069	0.989879	0.982207	0.973237	0.960781	0.95048	0.947719	0.941149	0.939814	0.936403	0.92981	0.920988
col_iaa	1.06534	1.06747	1.07585	1.08076	1.08228	1.08325	1.08691	1.0834	1.07943	1.08065	1.0923	1.10149	1.11967	1.13734	1.15195	1.16618	1.17181	1.1767	1.1664	1.15625	1.14402	1.13025	1.11786	1.09961	1.08554	1.0728	1.05913	1.04664	1.03473	1.02343	1.01063	1.00469	0.997359	0.991586	0.982642	0.974419	0.969852	0.967368	0.95935	0.952133	0.952659
col_iaa	1.06712	1.07938	1.0824	1.08871	1.09394	1.09992	1.10874	1.11594	1.12254	1.12478	1.1343	1.13721	1.15323	1.16688	1.18028	1.18788	1.19126	1.19905	1.19243	1.18687	1.1762	1.15139	1.12861	1.10412	1.08732	1.07311	1.05065	1.03465	1.02556	1.00932	1.00118	0.989847	0.981394	0.972714	0.959988	0.957514	0.94783	0.944842	0.942183	0.9408	0.935781
col_iaa	1.06457	1.0738	1.07882	1.07865	1.08193	1.08145	1.08309	1.08712	1.08629	1.08427	1.08574	1.09114	1.08807	1.0815	1.09824	1.10559	1.11279	1.12502	1.12409	1.13029	1.12769	1.12087	1.10911	1.09857	1.0824	1.06929	1.0491	1.03287	1.01407	1.00102	0.983119	0.970407	0.960766	0.947465	0.938147	0.926177	0.92028	0.917934	0.907325	0.905452	0.900154
col_iaa	1.05178	1.05811	1.06684	1.07353	1.07819	1.08419	1.08632	1.09462	1.0985	1.10037	1.10103	1.11101	1.12368	1.13929	1.15713	1.16836	1.18645	1.19565	1.19966	1.19984	1.19935	1.19171	1.17606	1.15057	1.12957	1.10096	1.08432	1.06188	1.05007	1.03755	1.02746	1.01758	1.00592	0.995745	0.983271	0.978004	0.974002	0.972896	0.96617	0.962216	0.957055
col_iaa	1.0495	1.05324	1.05885	1.05973	1.0654	1.04688	1.05411	1.07276	1.08111	1.09014	1.10027	1.1119	1.12122	1.13223	1.15013	1.16011	1.16593	1.17279	1.17259	1.16636	1.159	1.14188	1.12011	1.10432	1.08235	1.06242	1.04393	1.03361	1.01859	1.00938	1.0003	0.993062	0.982993	0.974041	0.968245	0.963066	0.954215	0.947431	0.945825	0.93586	0.938281
col_iaa	1.04012	1.0502	1.04528	1.04984	1.05302	1.05574	1.05952	1.05912	1.06238	1.07025	1.07548	1.07532	1.07991	1.08514	1.09511	1.10312	1.10324	1.10861	1.1083	1.10296	1.09615	1.09766	1.09039	1.08698	1.07047	1.05688	1.04723	1.03658	1.02828	1.01835	1.01512	1.00728	1.00067	0.991997	0.99197	0.98492	0.975839	0.973897	0.970196	0.965636	0.964599
col_iaa	1.05294	1.06114	1.07258	1.08348	1.09355	1.09329	1.08367	1.08423	1.08787	1.10938	1.14192	1.15229	1.14569	1.13758	1.12561	1.11714	1.10962	1.09005	1.05937	1.05031	1.03492	1.01237	0.998793	0.983293	0.970238	0.953814	0.939152	0.928692	0.920776	0.909095	0.90203	0.899006	0.886811	0.881553	0.879511	0.86794	0.865448	0.865081	0.860242	0.860427	0.860045
col_iaa	1.05685	1.06869	1.07281	1.07855	1.09239	1.10756	1.11412	1.12797	1.13521	1.14388	1.1461	1.15416	1.16065	1.1665	1.17577	1.18032	1.18884	1.19625	1.19745	1.20626	1.18835	1.18595	1.17139	1.1532	1.13692	1.11499	1.10029	1.08047	1.05968	1.04595	1.03479	1.02273	1.00449	0.991928	0.978558	0.965076	0.950238	0.939745	0.927519	0.923573	0.918813
col_iaa	1.01189	1.01685	1.01913	1.0269	1.0346	1.03938	1.04839	1.06124	1.05766	1.05798	1.06855	1.07389	1.09356	1.11194	1.11812	1.12911	1.13986	1.14851	1.1431	1.13052	1.12413	1.10565	1.08868	1.0686	1.05423	1.0436	1.03079	1.01348	1.00331	0.994698	0.985032	0.974741	0.964571	0.957044	0.949644	0.946678	0.935333	0.928969	0.921047	0.910911	0.908543
col_iaa	1.03982	1.04307	1.04274	1.05598	1.06487	1.07311	1.08395	1.08331	1.09257	1.09897	1.11339	1.1254	1.13979	1.15411	1.1682	1.18256	1.19477	1.19415	1.18648	1.18278	1.17562	1.16561	1.13542	1.10719	1.08405	1.05855	1.03549	1.01336	1.00363	0.984914	0.972927	0.961239	0.948115	0.940165	0.932862	0.926559	0.912777	0.913	0.904135	0.897576	0.893341
col_iaa	1.03389	1.03313	1.03556	1.03645	1.03877	1.04218	1.04279	1.04461	1.0433	1.04812	1.0526	1.05996	1.07504	1.09182	1.10234	1.10569	1.11128	1.11216	1.11005	1.10141	1.0926	1.07824	1.07083	1.05376	1.04347	1.03112	1.02072	1.00848	0.996461	0.989936	0.978203	0.972065	0.961869	0.954896	0.947156	0.939205	0.933141	0.923742	0.918442	0.916978	0.912035
col_iaa	1.04778	1.05721	1.06602	1.07228	1.0842	1.08751	1.09821	1.10583	1.11336	1.12016	1.12989	1.13931	1.14722	1.16238	1.16173	1.16314	1.15714	1.14542	1.1331	1.11949	1.09977	1.08418	1.06475	1.04775	1.03292	1.0183	1.00701	0.999171	0.98886	0.972131	0.965224	0.956977	0.945036	0.938316	0.933062	0.929761	0.925609	0.924487	0.927982	0.922493	0.930145
col_iaa	1.03679	1.03887	1.04547	1.04926	1.05795	1.06648	1.06961	1.08006	1.08775	1.08902	1.09705	1.11208	1.1197	1.13252	1.13953	1.14501	1.14702	1.1344	1.11632	1.10058	1.09155	1.07057	1.05376	1.03856	1.02378	1.0156	1.00153	0.99216	0.98396	0.975344	0.965591	0.959279	0.956252	0.954443	0.946954	0.94044	0.94159	0.939868	0.934693	0.931553	0.932831
col_iaa	1.03407	1.03801	1.0431	1.05087	1.05128	1.05954	1.05294	1.05567	1.06606	1.08386	1.0945	1.10203	1.10549	1.11853	1.13067	1.14239	1.15809	1.17286	1.18423	1.19117	1.20017	1.21047	1.20509	1.19859	1.18383	1.16155	1.13526	1.11018	1.09732	1.08616	1.06813	1.04654	1.02731	1.00107	0.988179	0.970239	0.963644	0.951144	0.939455	0.928956	0.920741
col_iaa	1.0652	1.07483	1.07928	1.07946	1.09171	1.09714	1.09641	1.09894	1.09862	1.10728	1.11259	1.11646	1.13196	1.13626	1.14372	1.15143	1.1643	1.17914	1.19141	1.20294	1.20986	1.21571	1.22104	1.21759	1.20817	1.19619	1.17921	1.15694	1.13641	1.11995	1.09879	1.07645	1.05881	1.03635	1.01646	1.00062	0.989037	0.981083	0.9681	0.956359	0.947649
col_iaa	1.06075	1.06874	1.08083	1.08796	1.10358	1.11267	1.12601	1.13323	1.14128	1.14698	1.14712	1.16194	1.17154	1.16727	1.18432	1.19857	1.20869	1.22348	1.2163	1.20419	1.19267	1.1702	1.14575	1.12771	1.11062	1.09295	1.06998	1.05128	1.04207	1.02967	1.01833	1.00577	0.996705	0.980809	0.969987	0.961221	0.944289	0.936028	0.925815	0.927849	0.927254
col_iaa	1.00852	1.01275	1.01221	1.01602	1.02869	1.04125	1.04269	1.04796	1.05289	1.05661	1.06168	1.06636	1.07765	1.0884	1.10226	1.09138	1.07902	1.09027	1.09158	1.116	1.15267	1.14403	1.12715	1.1117	1.08949	1.06556	1.05067	1.04204	1.02438	1.0118	1.00038	0.989887	0.979767	0.965574	0.956648	0.945614	0.940501	0.935616	0.931582	0.928492	0.914804
col_iaa	1.02838	1.03124	1.03845	1.04283	1.04536	1.03408	1.01668	1.03664	1.04518	1.05686	1.06823	1.07241	1.09021	1.0913	1.09695	1.11297	1.12678	1.12791	1.12687	1.12048	1.11468	1.10225	1.08188	1.06121	1.04452	1.03515	1.01733	1.00729	0.995062	0.983943	0.975123	0.969724	0.959336	0.95625	0.951742	0.942264	0.938398	0.929737	0.924101	0.915195	0.917865
col_iaa	1.02345	1.02994	1.03193	1.03811	1.04358	1.04633	1.05352	1.05699	1.06233	1.06518	1.07028	1.074	1.08604	1.0946	1.10269	1.11262	1.12527	1.14008	1.16044	1.17467	1.18315	1.1898	1.18962	1.18257	1.17633	1.15304	1.13306	1.10996	1.08753	1.06943	1.05397	1.04009	1.02703	1.01004	1.00462	0.992377	0.978141	0.97161	0.9628	0.955522	0.949528
col_iaa	1.00878	1.01436	1.02063	1.0209	1.02913	1.03486	1.04112	1.055	1.05815	1.06327	1.0663	1.07196	1.07383	1.08186	1.09364	1.09998	1.11946	1.12891	1.13843	1.14088	1.13679	1.1326	1.12743	1.11631	1.09751	1.08736	1.06968	1.05596	1.04289	1.03182	1.0139	1.00294	0.990074	0.982849	0.974323	0.969313	0.960778	0.960022	0.952272	0.952939	0.947246
col_iaa	1.03926	1.04705	1.05281	1.06393	1.06213	1.07051	1.07345	1.08057	1.08358	1.09402	1.10125	1.10273	1.10946	1.12217	1.13019	1.14159	1.15662	1.17305	1.18172	1.19349	1.19765	1.19432	1.18603	1.17435	1.15508	1.13526	1.11388	1.09657	1.08082	1.06069	1.04526	1.03602	1.03387	1.02166	1.01142	0.999692	0.991927	0.979294	0.969199	0.957055	0.954509
col_iaa	1.00711	1.01684	1.02109	1.02295	1.02829	1.03444	1.03278	1.03497	1.02667	1.02751	1.05719	1.07147	1.08704	1.09938	1.10931	1.11986	1.13086	1.13505	1.14461	1.1465	1.1456	1.14173	1.13116	1.11932	1.10231	1.09532	1.07668	1.06151	1.05133	1.03265	1.02318	1.01686	1.01192	1.00181	0.991435	0.987649	0.981347	0.977439	0.9657	0.963517	0.956529
col_iaa	1.02279	1.03062	1.0259	1.02642	1.03197	1.03779	1.04197	1.04468	1.04554	1.05416	1.05393	1.05899	1.06885	1.0791	1.08565	1.09788	1.11304	1.12224	1.1332	1.14625	1.15838	1.16333	1.16386	1.16504	1.15752	1.14475	1.13412	1.11575	1.10545	1.08667	1.07678	1.06782	1.03848	1.02772	1.02351	1.01132	1.01	1.00304	0.994333	0.989507	0.98197
col_iaa	1.06547	1.07296	1.07875	1.08664	1.08473	1.0951	1.10149	1.1086	1.11701	1.11956	1.12214	1.13542	1.14978	1.15959	1.16983	1.177	1.17932	1.18578	1.17935	1.17181	1.16103	1.15055	1.13612	1.12027	1.10494	1.09084	1.0724	1.06895	1.05396	1.04086	1.03379	1.01867	1.01423	1.01022	1.00331	0.992141	0.982067	0.978248	0.967855	0.972183	0.96713
col_iaa	1.05218	1.04989	1.05869	1.06475	1.07295	1.07626	1.0871	1.08852	1.08754	1.09903	1.12334	1.13505	1.1458	1.16189	1.16867	1.19042	1.18837	1.19102	1.18912	1.17535	1.15718	1.13807	1.12103	1.10183	1.08953	1.06825	1.04837	1.0341	1.02442	1.01892	1.01403	1.00949	1.00555	1.00159	0.997321	0.993824	0.987478	0.987071	0.985773	0.97439	0.975484
cngc_iaa	0.973709	0.973852	0.981148	0.98207	0.981364	0.985612	0.983616	0.984419	0.983415	0.980202	0.983193	0.982203	0.979355	0.980376	0.98272	0.985748	0.979847	0.98149	0.980372	0.980289	0.985165	0.9897	0.98995	1.00471	1.00994	1.00672	0.989539	0.974808	0.961225	0.951684	0.94798	0.944845	0.942155	0.941607	0.938077	0.931338	0.932136	0.931156	0.933919	0.926532	0.924139
cngc_iaa	0.966072	0.965678	0.962507	0.963028	0.956066	0.958387	0.959738	0.957687	0.959647	0.960604	0.95905	0.96539	0.9688	0.978532	0.98426	0.994764	1.00081	1.00069	1.0014	1.00014	1.0006	0.996241	0.9895	0.979459	0.984274	0.979139	0.974648	0.972534	0.960362	0.95136	0.949302	0.943653	0.938734	0.936261	0.930733	0.923877	0.929132	0.921059	0.920174	0.922817	0.922063
cngc_iaa	0.984654	0.983921	0.976152	0.980043	0.971637	0.964703	0.967835	0.979606	0.992212	0.994133	0.996219	0.999439	1.00832	1.00795	1.00818	1.01418	1.01282	1.01461	1.00971	1.00795	1.00732	1.00068	0.995253	0.983868	0.981758	0.977617	0.972351	0.969898	0.968803	0.961809	0.964158	0.964151	0.967933	0.968092	0.96722	0.954813	0.953249	0.952829	0.949696	0.942039	0.940185
cngc_iaa	0.979626	0.983418	0.989749	0.99085	0.993785	0.99542	1.00054	1.00828	1.01105	1.01106	1.02424	1.03301	1.03765	1.04881	1.05769	1.06623	1.07842	1.08032	1.07153	1.07832	1.07588	1.07031	1.06247	1.06625	1.05893	1.04301	1.03114	1.01435	0.998926	0.988915	0.978067	0.963653	0.961618	0.956051	0.949935	0.945306	0.945971	0.936874	0.932006	0.92197	0.916404
cngc_iaa	0.972232	0.971371	0.980689	0.980206	0.981044	0.991918	0.991123	0.983999	0.988617	0.994586	0.999929	1.00701	1.02012	1.02319	1.02722	1.02203	1.02233	1.01955	1.02078	1.02096	1.01605	1.01369	1.00904	1.00367	0.992753	0.977964	0.961852	0.951609	0.944267	0.932839	0.931071	0.927282	0.91997	0.91661	0.912366	0.908066	0.903219	0.899887	0.895376	0.890689	0.887272
cngc_iaa	0.991662	0.994485	0.996089	0.997741	1.00364	1.00528	1.00508	1.0058	1.00633	1.00516	1.00733	1.00906	1.01373	1.02014	1.02245	1.01988	1.02294	1.02045	1.0216	1.02203	1.01865	1.01289	0.994042	0.968303	0.968799	0.939759	0.96805	0.967784	0.961021	0.959014	0.954627	0.952176	0.948448	0.93716	0.9364	0.932663	0.928551	0.930089	0.929871	0.92884	0.926531
cngc_iaa	0.985686	0.989286	0.999692	0.996119	0.994446	0.997333	0.998788	1.00359	1.00428	1.00391	1.00211	1.00898	1.01193	1.01865	1.03063	1.03621	1.04545	1.05524	1.06126	1.06908	1.06475	1.05317	1.03926	1.02603	1.01705	1.00206	0.99377	0.985723	0.97745	0.973584	0.971054	0.958486	0.954817	0.95222	0.948772	0.939787	0.938499	0.931967	0.932134	0.931658	0.926006
cngc_iaa	0.982438	0.98568	0.983061	0.987276	0.99397	0.996543	1.00032	1.00336	1.00495	1.00915	1.00427	1.003	1.01398	1.02472	1.04259	1.05294	1.07029	1.07155	1.08756	1.09626	1.09735	1.09075	1.07887	1.0612	1.03813	1.0197	1.0043	0.992039	0.984714	0.976958	0.968198	0.962439	0.959671	0.949851	0.948291	0.938388	0.938809	0.933362	0.928332	0.927037	0.918561
cngc_iaa	1.00472	1.01137	1.01686	1.0186	1.02435	1.02816	1.03293	1.03739	1.04814	1.05154	1.05524	1.06849	1.0657	1.06356	1.06815	1.06697	1.06648	1.05458	1.03064	1.02646	1.0223	1.01338	1.00368	0.993357	0.986963	0.981573	0.977135	0.969545	0.965778	0.965855	0.959805	0.958944	0.951546	0.950339	0.945601	0.944082	0.94392	0.944567	0.939273	0.933367	0.929425
cngc_iaa	1.00292	1.00295	1.00432	1.007	1.00717	1.01385	1.01085	1.01366	1.01776	1.01806	1.02273	1.02987	1.04348	1.0558	1.06781	1.07473	1.07215	1.06242	1.04821	1.03841	1.02886	1.02067	1.0096	0.999243	0.987026	0.980544	0.970871	0.968215	0.963671	0.956311	0.949753	0.942831	0.942674	0.941164	0.938401	0.931471	0.933438	0.931529	0.931036	0.925162	0.92674
cngc_iaa	0.903579	0.904276	0.911848	0.913749	0.913782	0.915673	0.910215	0.915079	0.913813	0.913297	0.914989	0.914962	0.915936	0.915208	0.923314	0.927206	0.929239	0.938271	0.950105	0.947522	0.942522	0.944813	0.93398	0.927535	0.916835	0.901035	0.892236	0.886352	0.880111	0.878034	0.871719	0.869883	0.869341	0.8625	0.85804	0.849524	0.849811	0.844609	0.841776	0.837773	0.832641
cngc_iaa	0.898174	0.905608	0.908444	0.909555	0.909728	0.910891	0.91683	0.923958	0.922325	0.924432	0.929198	0.936468	0.942518	0.950932	0.934609	0.915529	0.918471	0.916405	0.91595	0.914158	0.911429	0.905016	0.903726	0.893487	0.885191	0.877021	0.867952	0.868421	0.865278	0.857834	0.851331	0.849672	0.84113	0.834702	0.831045	0.824854	0.826188	0.825032	0.823677	0.819935	0.817353
cngc_iaa	0.915295	0.917638	0.913803	0.918001	0.918901	0.925232	0.922718	0.922792	0.925476	0.930069	0.937312	0.940904	0.941429	0.94385	0.930834	0.94605	0.958392	0.959679	0.959176	0.933651	0.901788	0.890946	0.886279	0.877853	0.872936	0.871314	0.867034	0.865262	0.856846	0.855763	0.8521	0.849432	0.852845	0.850654	0.843626	0.842126	0.842332	0.838275	0.840088	0.835384	0.833161
cngc_iaa	0.918187	0.926811	0.934848	0.940115	0.94747	0.948266	0.954016	0.953712	0.958217	0.955393	0.959415	0.956882	0.961809	0.963178	0.952188	0.943104	0.931222	0.926899	0.900751	0.891784	0.878191	0.880331	0.87198	0.859087	0.849016	0.84397	0.832676	0.828023	0.823846	0.820298	0.81083	0.816332	0.812566	0.814199	0.809203	0.813688	0.813926	0.806727	0.814067	0.813831	0.816404
cngc_iaa	0.917792	0.918548	0.898505	0.915273	0.892989	0.899381	0.92256	0.924302	0.927496	0.928098	0.934703	0.940302	0.942912	0.948158	0.950028	0.952121	0.954633	0.947529	0.943727	0.941263	0.928543	0.916858	0.904568	0.892862	0.884306	0.875609	0.869292	0.862444	0.855511	0.849609	0.846014	0.846288	0.84442	0.838665	0.831947	0.833611	0.833196	0.832484	0.8311	0.832338	0.834001
cngc_iaa	0.916186	0.920342	0.91705	0.910542	0.910926	0.912555	0.911986	0.915811	0.922138	0.924839	0.925197	0.924584	0.920766	0.923454	0.918873	0.919105	0.913508	0.904709	0.89804	0.89513	0.884714	0.879587	0.868278	0.860237	0.854415	0.850476	0.850617	0.849525	0.850009	0.84553	0.849641	0.850996	0.848321	0.839895	0.84031	0.842757	0.840486	0.836246	0.840229	0.839333	0.843458
cngc_iaa	0.905461	0.904135	0.908018	0.917258	0.915672	0.914721	0.919819	0.918641	0.919953	0.922247	0.916399	0.918115	0.918915	0.914076	0.909891	0.904056	0.897948	0.888152	0.881733	0.878394	0.874829	0.861231	0.862389	0.855414	0.85238	0.851699	0.844461	0.843593	0.83789
cngc_iaa	0.885371	0.88632	0.893262	0.899335	0.895933	0.894821	0.899958	0.901043	0.904718	0.905677	0.906298	0.905386	0.908474	0.907876	0.904948	0.90113	0.898822	0.895046	0.894335	0.891503	0.886259	0.878402	0.872798	0.869377	0.863983	0.862877	0.856506	0.855679	0.852381	0.849415	0.850457	0.847986	0.843876	0.841103	0.84588	0.843135	0.841786	0.839343	0.836387	0.836022	0.83643
cngc_iaa	1.0263	1.0301	1.02728	1.03449	1.03289	1.03251	1.03573	1.03813	1.04234	1.04465	1.04913	1.05219	1.05126	1.05048	1.04335	1.05394	1.06224	1.07038	1.07588	1.07284	1.07469	1.06254	1.04999	1.02645	1.02292	1.01858	1.00444	1.00079	0.990793	0.988849	0.985299	0.987362	0.974153	0.975603	0.96864	0.966192	0.966198	0.960598	0.95876	0.956316	0.944857
cngc_iaa	1.03666	1.03341	1.03856	1.03604	1.0392	1.03961	1.03897	1.03552	1.03617	1.04192	1.03824	1.03382	1.0338	1.04302	1.04468	1.04791	1.05276	1.05329	1.05773	1.06255	1.06169	1.05856	1.05969	1.05643	1.05521	1.05063	1.04239	1.03235	1.01823	1.01267	1.00108	0.99505	0.992903	0.987361	0.983164	0.98229	0.972049	0.963725	0.960678	0.957537	0.953938
cngc_iaa	1.01535	1.0208	1.0279	1.03287	1.03278	1.0365	1.03528	1.04403	1.04057	1.03984	1.04166	1.039	1.03882	1.03146	1.03294	1.03861	1.03628	1.03792	1.03665	1.04177	1.03616	1.03349	1.0265	1.02543	1.02043	1.0141	1.01371	1.00479	0.999888	0.99268	0.995189	0.987608	0.980989	0.976072	0.972019	0.967025	0.961462	0.961033	0.954	0.955452	0.94876
cngc_iaa	0.989462	0.991445	0.991546	0.98312	0.996612	0.98979	0.987744	0.987143	0.989444	0.986953	0.986504	0.991113	0.993341	0.996168	0.999446	0.996265	0.995868	0.994672	0.987087	0.981285	0.975255	0.973758	0.969136	0.961221	0.95216	0.939488	0.929909	0.921418	0.914323	0.909827	0.904244	0.899406	0.893575	0.889724	0.884746	0.88465	0.881293	0.873702	0.873702	0.878839	0.878129
cngc_iaa	0.992009	0.997409	1.00152	0.995319	0.995226	0.979433	0.991378	1.00468	1.00862	1.01233	1.01778	1.02753	1.03239	1.03795	1.04549	1.04474	1.03718	1.03657	1.02831	1.01553	1.00537	0.998467	0.988735	0.97363	0.964364	0.950338	0.940976	0.938156	0.93064	0.926715	0.925209	0.917452	0.909823	0.902174	0.898195	0.898821	0.89726	0.897547	0.893747	0.898385	0.897586
cngc_iaa	1.03136	1.03125	1.03163	1.0332	1.02957	1.02738	1.02919	1.02597	1.02073	1.01996	1.02767	1.02559	1.02887	1.02829	1.02896	1.0299	1.03338	1.03442	1.03733	1.03584	1.03034	1.01772	1.00159	0.999551	0.99039	0.981875	0.970725	0.964347	0.957874	0.954139	0.952983	0.949285	0.941749	0.933991	0.932193	0.929113	0.928297	0.920222	0.912129	0.907155	0.901962
cngc_iaa	1.02144	1.01745	1.02198	1.02771	1.0223	1.02384	1.0264	1.02633	1.01663	1.02486	1.0276	1.03194	1.03058	1.03764	1.03382	1.0375	1.04031	1.04184	1.04001	1.03635	1.03345	1.02661	1.01606	1.00753	0.996157	0.984852	0.975798	0.969111	0.960955	0.956141	0.951388	0.944004	0.936964	0.93065	0.921509	0.922585	0.920614	0.909783	0.902048	0.896216	0.895562
cngc_iaa	1.05874	1.06007	1.07257	1.07527	1.06936	1.07618	1.07019	1.06397	1.06086	1.05519	1.05887	1.06242	1.06608	1.06387	1.05953	1.06635	1.06599	1.06936	1.07557	1.08052	1.08718	1.08769	1.09251	1.08466	1.07987	1.07003	1.05758	1.04165	1.02882	1.0158	1.00915	0.996968	0.984014	0.975624	0.964459	0.955597	0.950657	0.941969	0.941655	0.937517	0.932321
cngc_iaa	1.01549	1.01233	1.0127	1.01201	1.0085	1.00626	1.00665	0.99919	0.997946	1.00076	0.997508	0.999025	0.9998	1.00027	1.0049	1.00223	1.00332	0.996346	0.990359	0.981804	0.975837	0.964644	0.943367	0.936851	0.93198	0.92622	0.917492	0.91512	0.907715	0.909073	0.901585	0.903975	0.901108	0.90507	0.900071	0.897457	0.895447	0.896638	0.8961	0.900666	0.897868
cngc_iaa	1.02568	1.03634	1.0353	1.04478	1.05043	1.05712	1.06548	1.07391	1.07716	1.08696	1.09035	1.10036	1.10767	1.10997	1.11737	1.1179	1.11619	1.11472	1.10924	1.10183	1.08652	1.07037	1.05121	1.03884	1.03202	1.02229	1.01657	1.01337	1.00771	0.996577	0.992148	0.99318	0.985377	0.980844	0.976522	0.96718	0.961114	0.960961	0.95299	0.952512	0.949545
cngc_iaa	1.02325	1.01775	1.02224	1.02948	1.03388	1.03296	1.03671	1.0352	1.04224	1.03999	1.04303	1.04214	1.03074	1.03331	1.02809	1.03493	1.02821	1.03708	1.04533	1.04015	1.02896	1.01727	1.00588	0.997718	0.990903	0.977998	0.980573	0.978987	0.969756	0.965437	0.959605	0.94968	0.948203	0.93724	0.936386	0.929731	0.925821	0.922732	0.912796	0.908973	0.90781
cngc_iaa	1.01991	1.02821	1.02676	1.03425	1.03523	1.04339	1.05064	1.04983	1.06398	1.07118	1.08374	1.08488	1.09066	1.09737	1.09507	1.09633	1.10431	1.09334	1.09433	1.08867	1.07474	1.05398	1.03828	1.02612	1.01459	1.00681	0.999772	0.99007	0.986033	0.977285	0.967557	0.960581	0.952758	0.946831	0.935964	0.927748	0.922741	0.917767	0.910712	0.908049	0.899287
cngc_iaa	1.03951	1.04786	1.05143	1.05642	1.06307	1.06992	1.07993	1.08222	1.08837	1.08655	1.09041	1.10629	1.10987	1.1141	1.11761	1.11845	1.11776	1.12048	1.12385	1.11907	1.11444	1.10602	1.09774	1.08453	1.06394	1.04944	1.04098	1.03688	1.03012	1.02413	1.01628	1.01423	1.00678	1.00604	0.997485	0.989625	0.98334	0.982321	0.975214	0.970909	0.967575
cngc_iaa	0.987388	0.98633	0.988761	0.992438	0.993821	0.994188	0.992892	0.994784	0.989408	0.988801	0.99116	0.9875	0.985236	0.980818	0.974425	0.963586	0.959959	0.970279	0.965366	0.959985	0.953458	0.948345	0.952049	0.939589	0.929255	0.92223	0.90206	0.897795	0.894314	0.882032	0.872166	0.867055	0.860318	0.851533	0.838734	0.8371	0.831084	0.827113	0.828665	0.835231	0.834917
cngc_iaa	0.992215	0.989583	0.991129	0.997077	0.99845	1.00133	0.99993	0.999356	0.994256	0.995682	0.994133	0.994188	0.991976	0.990119	0.981994	0.979267	0.970234	0.962505	0.955054	0.948696	0.944833	0.933243	0.92053	0.912033	0.905652	0.891974	0.883818	0.88221	0.877373	0.875141	0.874044	0.871467	0.84898	0.835085	0.830786	0.826353	0.824088	0.821303	0.817964	0.814304	0.817794
cngc_iaa	1.02176	1.02526	1.02849	1.02491	1.02954	1.02449	1.0288	1.03203	1.03137	1.03336	1.03899	1.04551	1.04192	1.05052	1.06249	1.06294	1.06494	1.0582	1.05571	1.0462	1.03488	1.02006	1.00757	0.99323	0.985034	0.979875	0.976521	0.963985	0.959764	0.943184	0.945838	0.94767	0.932968	0.92424	0.919992	0.907626	0.903854	0.893545	0.887309	0.884619	0.881891
cngc_iaa	1.01546	1.02043	1.02232	1.02598	1.03018	1.03258	1.03646	1.03638	1.03915	1.04142	1.02546	1.02849	1.04678	1.05221	1.06061	1.06711	1.07512	1.07742	1.0797	1.0771	1.07032	1.05645	1.05015	1.03901	1.0313	1.02317	1.01536	1.00473	0.997651	0.990636	0.987225	0.977021	0.973953	0.973384	0.96639	0.956141	0.952545	0.945592	0.943485	0.934413	0.931858
cngc_iaa	1.00613	1.0143	1.016	1.01646	1.02564	1.02849	1.02906	1.02913	1.0351	1.04356	1.04596	1.04895	1.05315	1.05373	1.05387	1.05958	1.06261	1.06475	1.06478	1.06499	1.07047	1.07056	1.07173	1.06628	1.05527	1.03677	1.03117	1.02041	1.00898	1.00171	0.99227	0.986196	0.9834	0.977901	0.973624	0.967382	0.949942	0.950864	0.948422	0.942687	0.93764
cngc_iaa	1.0129	1.01266	1.0134	1.02295	1.01379	0.990901	1.00376	1.01192	1.01573	1.02473	1.02927	1.02495	1.02785	1.02659	1.03035	1.03188	1.02668	1.02037	1.01258	1.00902	0.995024	0.98494	0.975672	0.97371	0.965763	0.956139	0.947144	0.93941	0.936867	0.931259	0.925028	0.92141	0.92026	0.915405	0.911881	0.91244	0.907921	0.904385	0.898078	0.8898	0.885211
cngc_iaa	1.0023	1.012	1.01445	1.0203	1.01979	1.01748	1.01574	1.01229	1.00826	1.00207	0.995335	0.996904	0.99161	0.991637	0.978774	0.981669	0.983071	0.991132	0.988705	0.993844	0.995283	0.993366	0.990906	0.988609	0.988545	0.981943	0.978925	0.970983	0.965232	0.957683	0.953937	0.952522	0.94703	0.941988	0.939128	0.928446	0.922598	0.919011	0.91061	0.909298	0.905166
cngc_iaa	1.00424	1.00533	1.00853	1.00771	1.00436	1.00272	1.00306	1.00386	1.0023	0.992204	0.999226	1.00606	1.0042	1.0158	1.02405	1.025	1.03063	1.03238	1.03388	1.03836	1.04516	1.04282	1.04062	1.02657	1.0146	1.00682	0.996624	0.990719	0.980623	0.971643	0.971055	0.960099	0.95581	0.951588	0.94679	0.93766	0.935639	0.93285	0.922309	0.923761	0.914315
cngc_iaa	1.0255	1.03189	1.03617	1.0417	1.04179	1.04182	1.0418	1.03954	1.03911	1.04459	1.04065	1.04263	1.04902	1.05681	1.05649	1.06086	1.06522	1.05982	1.0577	1.05606	1.05685	1.05097	1.05534	1.05246	1.0537	1.04622	1.03647	1.02876	1.01585	1.00279	1.00128	0.99539	0.992486	0.985064	0.983462	0.974928	0.969765	0.965058	0.963488	0.958237	0.958321
cngc_iaa	1.07346	1.07764	1.08652	1.08771	1.08927	1.08945	1.09114	1.09108	1.08826	1.08854	1.08538	1.08388	1.08426	1.08624	1.07909	1.08113	1.08477	1.08167	1.08307	1.0853	1.08835	1.09125	1.09608	1.10293	1.11519	1.12581	1.12575	1.11468	1.09147	1.07459	1.06047	1.0522	1.04491	1.0317	1.02167	1.00871	1.00326	1.00171	0.995701	0.991824	0.994888
cngc_iaa	1.04482	1.05207	1.05526	1.05661	1.0553	1.06078	1.0676	1.0674	1.06457	1.05827	1.0623	1.05979	1.06444	1.06319	1.06364	1.06858	1.06781	1.06826	1.0703	1.06581	1.0682	1.06185	1.0623	1.0576	1.0537	1.04777	1.04597	1.03797	1.03483	1.02582	1.02272	1.01747	1.00771	1.00076	0.996213	0.993778	0.983651	0.975643	0.972118	0.968083	0.955589
cngc_iaa	0.994465	1.00036	1.00183	1.00195	1.002	1.00228	1.00417	1.00307	1.00501	1.00367	1.00295	1.00239	1.00185	1.00494	1.00881	1.01262	1.01034	1.01625	1.01608	1.01986	1.01959	1.01827	1.01772	1.01788	1.01102	1.00188	0.99363	0.992885	0.991497	0.987533	0.980169	0.977308	0.973605	0.965297	0.961478	0.954643	0.952411	0.950073	0.943262	0.940664	0.934851
cngcomp_iaa	1.00743	1.0124	1.01914	1.02557	1.03425	1.04861	1.06625	1.0756	1.09328	1.11145	1.13761	1.15188	1.18056	1.17939	1.16999	1.15856	1.19684	1.19457	1.18361	1.16781	1.14523	1.1307	1.11066	1.0922	1.07159	1.05805	1.04308	1.03146	1.01673	1.01062	1.00477	0.99656	0.990627	0.985611	0.981563	0.973666	0.969991	0.967842	0.96833	0.961191	0.956336
cngcomp_iaa	1.02074	1.02547	1.03234	1.04308	1.04818	1.0581	1.06904	1.08117	1.09752	1.1248	1.14064	1.17101	1.19138	1.21671	1.23144	1.24337	1.26519	1.26191	1.2567	1.24495	1.22844	1.20253	1.18521	1.16076	1.13753	1.11902	1.10068	1.08318	1.07237	1.05685	1.05284	1.04464	1.03303	1.02276	1.03442	1.03317	1.02703	1.02275	1.01925	1.01728	1.0102
cngcomp_iaa	1.03391	1.04133	1.04673	1.05154	1.05489	1.06438	1.08916	1.11746	1.13019	1.1499	1.16443	1.18471	1.19681	1.20666	1.20977	1.19722	1.18417	1.16672	1.14289	1.11745	1.09827	1.08189	1.0632	1.05241	1.04218	1.03941	1.03296	1.02557	1.01732	1.01156	1.00882	1.00063	0.995517	0.987421	0.986901	0.984687	0.981392	0.977054	0.971427	0.970835	0.964195
cngcomp_iaa	1.02537	1.03372	1.03542	1.04438	1.05081	1.06005	1.07428	1.08663	1.09844	1.11234	1.12814	1.14463	1.16027	1.17866	1.19441	1.20693	1.2122	1.22176	1.22322	1.21927	1.21076	1.19725	1.17706	1.15332	1.13889	1.11522	1.09027	1.0683	1.05667	1.04157	1.03637	1.02986	1.02389	1.01464	1.00479	0.990001	0.977395	0.981276	0.980023	0.977437	0.966843
cngcomp_iaa	1.03217	1.04351	1.0498	1.05776	1.06628	1.08083	1.09702	1.10667	1.11979	1.13166	1.15042	1.16875	1.18923	1.19552	1.17756	1.17629	1.18707	1.22489	1.26945	1.26382	1.25352	1.23936	1.21788	1.18884	1.16884	1.15578	1.13906	1.11887	1.10669	1.09222	1.07946	1.07606	1.05984	1.05653	1.05157	1.04258	1.03799	1.02028	1.00971	1.00673	1.00771
cngcomp_iaa	1.03754	1.04083	1.04391	1.05377	1.06953	1.08894	1.09524	1.10699	1.12275	1.12417	1.1448	1.16543	1.19163	1.21595	1.22208	1.22164	1.20795	1.20897	1.2023	1.17593	1.16102	1.13992	1.1297	1.1064	1.09403	1.08041	1.06762	1.06344	1.04966	1.04846	1.03887	1.03209	1.0235	1.01981	1.01602	1.00825	1.00348	0.998176	0.998662	0.993948	0.987223
cngcomp_iaa	1.04443	1.05094	1.0582	1.06676	1.07831	1.09029	1.09791	1.09372	1.0962	1.11112	1.13263	1.15953	1.18772	1.20431	1.21632	1.21654	1.21629	1.20775	1.19939	1.18193	1.16483	1.13863	1.12421	1.10953	1.08834	1.07967	1.06756	1.05305	1.04563	1.03837	1.02581	1.02234	1.01686	1.01521	1.01014	1.00484	0.99861	0.988316	0.988521	0.984539	0.980519
cngcomp_iaa	1.01133	1.01849	1.02426	1.03195	1.04385	1.04566	1.05872	1.07406	1.09078	1.10311	1.11691	1.13224	1.14906	1.16141	1.17146	1.18868	1.22305	1.22907	1.22766	1.23169	1.22365	1.21046	1.19084	1.17349	1.15299	1.13415	1.11563	1.09635	1.08032	1.06384	1.0501	1.04638	1.04154	1.03218	1.01831	1.01636	1.00911	1.00661	0.998632	0.992742	0.989918
cngcomp_iaa	1.04652	1.05323	1.05691	1.05984	1.06651	1.08008	1.09601	1.11552	1.13554	1.15414	1.17682	1.18966	1.20481	1.2141	1.2211	1.22738	1.22636	1.21456	1.20713	1.19303	1.16662	1.14537	1.1281	1.10844	1.09099	1.07307	1.06292	1.04668	1.03754	1.03025	1.01951	1.01603	1.01039	1.00582	0.998621	0.998854	0.991041	0.987944	0.982458	0.979485	0.979237
cngcomp_iaa	0.9465	0.95626	0.968493	0.978552	0.994714	1.00513	1.02107	1.03396	1.04422	1.05502	1.07075	1.08507	1.09335	1.10994	1.10992	1.10897	1.10405	1.09535	1.07632	1.04904	1.02768	1.01733	1.00275	0.987505	0.971336	0.968423	0.956912	0.944611	0.934903	0.93204	0.930606	0.922965	0.919606	0.914684	0.900614	0.903357	0.898089	0.88728	0.885547	0.880889	0.878727
cngcomp_iaa	0.939862	0.942129	0.95313	0.973338	0.978928	0.996161	1.00704	1.02543	1.04016	1.05376	1.06765	1.07764	1.08898	1.09575	1.09049	1.09337	1.08784	1.06885	1.0489	1.02661	1.00011	0.979465	0.959487	0.951082	0.940305	0.933263	0.928958	0.923506	0.915141	0.911468	0.902893	0.896261	0.89068	0.885509	0.884183	0.879511	0.875623	0.870974	0.867111	0.86513	0.860861
cngcomp_iaa	0.957077	0.963758	0.962076	0.976918	0.986609	1.00118	1.01205	1.01011	1.02161	1.04501	1.06764	1.07859	1.09458	1.10768	1.12202	1.13438	1.13704	1.13399	1.13463	1.12701	1.10842	1.08629	1.06449	1.043	1.01586	0.993486	0.982549	0.964973	0.951631	0.941666	0.935477	0.926649	0.923646	0.91889	0.917041	0.913459	0.905063	0.905956	0.898444	0.891027	0.887764
cngcomp_iaa	0.891821	0.894394	0.895414	0.90343	0.911511	0.918862	0.925922	0.934157	0.943456	0.957375	0.974158	0.992445	1.00645	1.02107	1.03758	1.05416	1.07228	1.07843	1.08711	1.09151	1.08649	1.08034	1.06752	1.03475	1.01211	0.993727	0.973112	0.95146	0.939195	0.924206	0.908283	0.893783	0.887302	0.875849	0.871536	0.862892	0.856774	0.853671	0.85302	0.849084	0.846034
cngcomp_iaa	0.957801	0.963603	0.963063	0.975218	0.983351	0.993518	1.00447	1.01998	1.02379	1.02802	1.05061	1.06267	1.07993	1.10241	1.11399	1.11714	1.1067	1.09407	1.07606	1.05505	1.03369	1.0097	0.988711	0.972073	0.954026	0.946975	0.936573	0.927868	0.92125	0.916015	0.907544	0.902283	0.894424	0.88972	0.884308	0.877611	0.872635	0.867101	0.86045	0.857496	0.852429
cngcomp_iaa	0.948293	0.944438	0.94062	0.958658	0.961598	0.965431	0.977242	0.986636	0.998995	1.03136	1.04332	1.05993	1.07392	1.08982	1.10037	1.11048	1.10999	1.10848	1.10307	1.08606	1.06513	1.04055	1.01293	0.993173	0.984449	0.968209	0.961435	0.948311	0.933212	0.924803	0.918174	0.909211	0.903009	0.899613	0.891933	0.88301	0.883504	0.876176	0.873055	0.867126	0.864452
cngcomp_iaa	0.967559	0.976549	0.98752	1.00271	1.01672	1.03401	1.04315	1.05868	1.07709	1.09271	1.10965	1.1124	1.11398	1.10723	1.08931	1.07229	1.05146	1.03046	1.00497	0.980867	0.961903	0.943207	0.932705	0.923477	0.911791	0.903472	0.899721	0.894854	0.888274	0.878857	0.878601	0.870879	0.86356	0.859431	0.854199	0.855102	0.850534	0.847427	0.8425	0.839086	0.833113
cngcomp_iaa	1.11279	1.12262	1.1352	1.14539	1.15643	1.17232	1.19004	1.21174	1.2288	1.24335	1.26623	1.2909	1.30036	1.31555	1.32754	1.33194	1.34102	1.32328	1.29618	1.25612	1.19699	1.16685	1.14041	1.13657	1.11694	1.09726	1.08352	1.06778	1.06116	1.05471	1.04519	1.03994	1.02809	1.02157	1.01345	1.00968	1.00383	1.00412	1.00019	0.994465	0.995639
cngcomp_iaa	1.10869	1.1196	1.12202	1.12724	1.1411	1.14717	1.16595	1.18115	1.19138	1.2045	1.22702	1.2374	1.26475	1.27623	1.28957	1.30085	1.30726	1.31296	1.31265	1.30985	1.28675	1.26451	1.236	1.20342	1.17717	1.15042	1.12742	1.11058	1.09719	1.08267	1.07107	1.06281	1.04842	1.03885	1.03394	1.02976	1.02397	1.02194	1.01189	1.00392	0.995384
cngcomp_iaa	1.16576	1.1718	1.17217	1.18122	1.19097	1.20408	1.21037	1.17398	1.18386	1.20148	1.24321	1.27546	1.29761	1.32363	1.33583	1.34557	1.34429	1.32515	1.3011	1.27931	1.24538	1.21778	1.19274	1.16658	1.15476	1.13839	1.1215	1.10208	1.09372	1.08572	1.07532	1.0677	1.05896	1.05663	1.04509	1.03649	1.03413	1.02342	1.02315	1.01699	1.01048
cngcomp_iaa	1.11103	1.14086	1.16511	1.19299	1.23004	1.25833	1.2574	1.24138	1.21815	1.21065	1.20837	1.20475	1.19375	1.14766	1.12638	1.10599	1.07543	1.0509	1.0337	1.01952	1.00986	1.0008	0.992195	0.984978	0.980231	0.974182	0.966703	0.966917	0.961498	0.960425	0.956915	0.951174	0.95028	0.947602	0.941573	0.938392	0.936903	0.926807	0.920724	0.920735	0.916783
cngcomp_iaa	1.27689	1.2799	1.27396	1.27533	1.27619	1.27425	1.27438	1.29071	1.3045	1.31144	1.32663	1.33945	1.34981	1.36276	1.36982	1.37672	1.37672	1.38045	1.37842	1.3722	1.35757	1.3475	1.32575	1.30606	1.28721	1.25984	1.23885	1.22227	1.2055	1.19356	1.1818	1.1646	1.14339	1.14289	1.13243	1.12755	1.12348	1.12011	1.11495	1.11095	1.10789
cngcomp_iaa	1.05194	1.05322	1.06259	1.07043	1.07803	1.08375	1.08963	1.09803	1.12483	1.16051	1.18403	1.20335	1.21992	1.22979	1.23737	1.23353	1.22058	1.20072	1.17398	1.14692	1.11426	1.08685	1.06315	1.04189	1.02374	1.01225	1.00061	0.990687	0.98004	0.971293	0.965839	0.952655	0.948985	0.946754	0.936864	0.933076	0.92488	0.919718	0.915162	0.915254	0.911952
cngcomp_iaa	1.10519	1.10244	1.11529	1.12088	1.12658	1.13219	1.13169	1.12772	1.12975	1.14076	1.15323	1.17444	1.17216	1.16586	1.14884	1.13174	1.10879	1.08719	1.06105	1.04046	1.01798	1.00618	0.991748	0.980416	0.969597	0.960643	0.954071	0.950391	0.95198	0.95017	0.947685	0.948428	0.95214	0.947152	0.94259	0.938844	0.930991	0.933935	0.93162	0.929806	0.928723
cngcomp_iaa	1.0803	1.08644	1.10103	1.10775	1.1228	1.13975	1.15462	1.17158	1.18798	1.20175	1.20821	1.21559	1.2071	1.18364	1.15744	1.12253	1.09843	1.06653	1.04374	1.01591	1.00415	0.994962	0.991777	0.989075	0.981834	0.980995	0.973685	0.970364	0.96451	0.964104	0.959269	0.957315	0.95835	0.960041	0.962016	0.955462	0.952739	0.940415	0.95009	0.946905	0.942805
cngcomp_iaa	1.11343	1.11804	1.12548	1.12928	1.14434	1.16129	1.17456	1.1927	1.20953	1.21924	1.21433	1.21369	1.20468	1.18384	1.15819	1.12642	1.09617	1.07266	1.04918	1.02847	1.01072	1.00257	0.986193	0.975783	0.964078	0.957668	0.954412	0.941931	0.942744	0.941825	0.942287	0.940159	0.940207	0.943168	0.939783	0.940649	0.931979	0.92941	0.934121	0.92565	0.924578
cngcomp_iaa	1.01848	1.02633	1.02418	1.03212	1.03521	1.03967	1.04919	1.0589	1.06879	1.08624	1.10173	1.11151	1.12232	1.13156	1.14959	1.16692	1.17418	1.1852	1.19072	1.19369	1.19249	1.19093	1.17683	1.16589	1.14858	1.12992	1.109	1.08735	1.07158	1.05694	1.03893	1.02807	1.01549	1.00531	0.994432	0.98986	0.982565	0.975909	0.966196	0.961546	0.95787
cngcomp_iaa	1.03283	1.03417	1.03944	1.04579	1.05356	1.06826	1.08181	1.09198	1.10743	1.11656	1.13455	1.15548	1.16925	1.18713	1.19915	1.20969	1.19715	1.17175	1.15579	1.15956	1.17015	1.17731	1.15893	1.12899	1.10853	1.08979	1.06667	1.04879	1.03134	1.0152	1.00399	0.995554	0.989568	0.982994	0.977164	0.975142	0.973713	0.973741	0.968706	0.958477	0.954843
cngcomp_iaa	1.02864	1.03939	1.03371	1.03286	1.04517	1.05675	1.06928	1.08296	1.09749	1.104	1.11527	1.13061	1.14901	1.16805	1.1855	1.20008	1.20853	1.20514	1.21779	1.22282	1.22595	1.22149	1.20823	1.19761	1.17999	1.15709	1.14025	1.11515	1.0977	1.08133	1.06305	1.05025	1.03548	1.02977	1.01951	1.01475	1.00428	0.997591	0.987084	0.982926	0.971427
cngcomp_iaa	1.03876	1.04379	1.05091	1.06388	1.07218	1.08701	1.10171	1.11886	1.13459	1.1423	1.16932	1.18143	1.19399	1.20132	1.20568	1.19883	1.19572	1.18579	1.16669	1.15265	1.12834	1.10841	1.09356	1.07824	1.05872	1.0451	1.03775	1.02608	1.01969	1.01133	1.00354	0.994656	0.989778	0.982936	0.97471	0.969032	0.953059	0.952736	0.94692	0.942851	0.935938
cngcomp_iaa	1.04373	1.0499	1.05701	1.06517	1.07535	1.08534	1.08648	1.1199	1.13485	1.1535	1.16608	1.1669	1.18405	1.19992	1.20179	1.19854	1.19165	1.17743	1.17134	1.14636	1.12043	1.0982	1.08155	1.06486	1.05541	1.03705	1.02512	1.01812	1.00395	0.992808	0.988108	0.984901	0.979701	0.967361	0.96013	0.953001	0.947462	0.943236	0.940841	0.937462	0.932144
cngcomp_iaa	1.03231	1.03297	1.04186	1.04394	1.05446	1.06104	1.07068	1.08687	1.09559	1.11021	1.13116	1.13354	1.15347	1.17729	1.18739	1.20348	1.21336	1.22057	1.23039	1.22486	1.2153	1.2063	1.18939	1.16698	1.14138	1.11647	1.09021	1.06818	1.05025	1.04007	1.02664	1.02108	1.00949	1.00193	0.990764	0.990369	0.985741	0.979802	0.978231	0.973	0.965737
cngcomp_iaa	1.0661	1.07771	1.08181	1.08796	1.09355	1.10087	1.10509	1.11243	1.12525	1.15139	1.17286	1.1837	1.19814	1.19808	1.20441	1.19706	1.19115	1.17911	1.16389	1.14019	1.12064	1.10122	1.07576	1.06065	1.03962	1.02284	1.00862	0.997844	0.988322	0.97605	0.97491	0.966282	0.955648	0.953967	0.949051	0.947633	0.939044	0.931197	0.9347	0.92306	0.923809
cngcomp_iaa	1.03964	1.04732	1.05331	1.05659	1.06296	1.07062	1.08547	1.09308	1.09808	1.10085	1.11086	1.11843	1.14833	1.1537	1.1639	1.16593	1.16398	1.15322	1.14077	1.11516	1.09617	1.08689	1.07078	1.05942	1.04718	1.03613	1.02363	1.01065	1.01074	1.00307	0.999534	0.989712	0.988617	0.980218	0.979434	0.972614	0.964841	0.958571	0.96189	0.958931	0.954642
cngcomp_iaa	1.05937	1.06825	1.06799	1.07701	1.08728	1.09587	1.10596	1.1108	1.13227	1.14393	1.15146	1.16197	1.17503	1.18048	1.1829	1.17615	1.16145	1.14137	1.1239	1.10324	1.08404	1.06172	1.04215	1.02602	1.00986	0.993508	0.988324	0.979683	0.977869	0.970468	0.966975	0.956807	0.947763	0.940941	0.938675	0.928477	0.929449	0.921473	0.921415	0.92392	0.917325

## Sheet: 4h
material: 4d old 3372 pAFB1::AFB1-mCitrine line and cngc14-1/p14::CNGC14-CDS1-GFP line
measure the intensity of the signal in the epidermal cell file using a segmented line of 35 px - using a individual z-section. Start in the level of QC
AFB measured using the 515 illumination, 10% laser, 500 ms
CNGC14 using 488 illumination, 15 or20% laser intensity, 1000 ms
20x objective
	bin the data along the root axis each 10 micrometers
																	CNGC14														AFB1
	distance	p14-CNGC14-CDS1-GFP-A-20pc-01	p14-CNGC14-CDS1-GFP-A-20pc-02	p14-CNGC14-CDS1-GFP-B-20pc-01	p14-CNGC14-CDS1-GFP-B-20pc-02	p14-CNGC14-CDS1-GFP-B-20pc-03	p14-CNGC14-CDS1-GFP-B-20pc-04	p14-CNGC14-CDS1-GFP-B-20pc-05	p14-CNGC14-CDS1-GFP-B-20pc-07	p14-CNGC14-CDS1-GFP-B-20pc-08	p14-CNGC14-CDS1-GFP-B-20pc-09	p14-CNGC14-CDS1-GFP-C-20pc-01	p14-CNGC14-CDS1-GFP-C-20pc-02	p14-CNGC14-CDS1-GFP-C-20pc-03	p14-CNGC14-CDS1-GFP-C-20pc-04	p14-CNGC14-CDS1-GFP-C-20pc-05	average	stdev			distance	3372-1	3372-2	3372-3	3372-4	3372-5	3372-6	3372-7	3372-8	3372-9	average	stdev
	5.225	141.69	142.146	147.728	136.85	137.307	145.054	144.551	141.431	141.643	144.387	134.854	144.066	142.291	137.109	151.699	142.187	4.44287			5.225	259.447	315.645	311.07	249.607	363.949	303.538	221.897	405.641	382.16	312.55	62.4962
	15.125	147.891	146.629	150.018	142.156	142.874	150.138	147.207	149.735	149.421	145.995	137.465	147.073	143.085	138.68	147.794	145.744	4.02856			15.125	263.562	334.384	327.122	295.947	389.303	365.057	262.746	408.559	443.039	343.302	63.4693
	25.025	153.612	151.737	150.654	145.583	147.516	158.045	148.633	150.839	156.482	146.696	140.909	150.701	148.558	140.63	150.678	149.418	4.86094			25.025	278.541	327.188	353.821	341.699	372.568	401.372	298.085	399.268	469.19	360.192	58.3658
	34.925	161.146	151.598	152.694	158.632	150.518	156.884	156.351	158.315	159.802	151.755	144.698	156.093	153.846	146.414	155.022	154.251	4.71978			34.925	302.524	315.06	353.462	390.973	379.717	417.045	337.7	424.173	480.745	377.933	57.3023
	44.825	162.662	163.686	156.097	166.636	152.05	164.228	164.765	161.337	164.223	152.096	148.477	165.184	165.541	150.324	153.33	159.376	6.48313			44.825	317.346	330.99	385.55	418.603	363.387	448.626	358.744	445.862	466.308	392.824	54.3055
	55	167.755	170.24	158.28	166.043	158.745	167.926	174.396	167.031	168.061	155.695	147.277	167.454	168.526	153.766	158.359	163.304	7.45002			55	331.119	348.099	379.775	415.741	387.89	407.47	370.611	460.369	510.001	401.231	55.7812
	65.175	169.7	175.524	180.611	166.521	162.513	174.84	185.644	171.319	174.68	163.198	152.069	170.414	176.889	161.528	162.459	169.861	8.64745			65.175	358.577	339.094	405.939	413.981	386.768	403.268	379.742	487.293	544.791	413.273	64.4704
	75.075	176.411	180.275	176.926	167.11	162.14	186.969	185.434	168.63	181.987	164.472	163.737	177.696	195.481	166.423	165.16	174.59	10.1241			75.075	405.698	328.665	444.963	434.354	428.507	449.034	381.492	495.087	515.492	431.477	56.2865
	84.975	182.197	187.195	183.316	164.558	174.124	183.505	194.045	179.455	179.389	167.208	162.187	186.205	186.655	163.486	168.845	177.491	10.0615			84.975	429.986	337.179	475.063	440.487	409.329	428.049	410.079	491.47	495.429	435.23	49.2415
	94.875	189.067	181.603	183.505	187.867	167.568	194.057	203.406	183.139	179.696	177.907	163.649	183.944	198.983	174.319	184.339	183.537	10.6235			94.875	433.48	343.937	472.712	434.532	389.509	423.296	384.864	480.278	484.981	427.51	48.063
	105.05	190.53	186.924	186.114	193.702	173.894	189.593	195.55	195.245	197.122	196.177	162.201	192.338	191.665	183	187.724	188.119	9.36336			105.05	443.915	345.384	499.959	428.997	393.61	462.046	400.867	479.361	518.347	441.387	55.3662
	115.225	194.575	192.63	201.351	193.772	173.353	189.564	200.851	200.626	198.345	194.358	162.166	202.636	193.485	190.685	179.669	191.204	11.3374			115.225	509.312	375.354	497.375	464.623	493.02	484.649	454.221	447.961	515.71	471.358	43.0605
	125.125	204.617	199.171	201.673	203.647	173.038	189.586	196.692	198.045	202.568	203.954	167.615	202.996	210.662	188.804	176.558	194.642	12.8901			125.125	491.79	394.594	475.274	550.535	542.633	490.584	436.693	464.297	541.818	487.58	52.3117
	135.025	202.477	198.308	194.641	206.656	178.513	203.361	197.834	213.627	193.461	205.774	170.209	211.68	220.615	191.273	176.754	197.679	14.1574			135.025	542.976	417.304	520.764	609.421	508.055	517.687	427.461	454.236	534.404	503.59	61.1263
	144.925	197.714	197.483	198.282	209.618	173.536	196.901	196.626	200.795	193.26	201.259	175.139	207.456	200.824	195.89	197.695	196.165	9.82697			144.925	548.873	414.343	510.035	633.048	491.508	529.917	441.464	485.027	575.697	514.435	67.0826
	154.825	192.592	202.952	188.498	209.923	179.373	200.018	185.953	200.873	185.955	204.018	184.988	213.735	198.876	195.098	191.217	195.605	9.8487			154.825	573.449	444.249	513.503	654.9	506.744	602.294	480.021	497.028	586.178	539.818	67.7809
	165	192.367	200.945	184.749	205.192	179.317	198.798	199.258	206.033	189.475	202.658	195.371	213.009	193.471	190.15	202.589	196.892	8.84334			165	619.53	420.125	567.597	668.998	567.331	589.92	524.707	503.599	588.849	561.184	71.8004
	175.175	188.293	200.201	186.065	212.414	182.48	194.486	189.934	200.611	195.14	207.817	194.687	205.017	194.361	205.434	196.534	196.898	8.41597			175.175	584.763	459.858	559.468	669.569	575.724	565.471	533.788	509.314	601.614	562.174	59.0232
	185.075	192.506	194.309	181.801	206.295	183.198	199.409	193.016	203.215	191.709	198.088	185.816	198.71	207.302	200.12	190.795	195.086	7.80221			185.075	620.65	527.362	539.462	634.143	599.867	550.024	510.928	525.693	611.871	568.889	47.3233
	194.975	186.838	197.105	186.085	203.516	173.776	200.643	184.435	209.475	198.554	197.658	193.157	206.144	204.917	193.572	187.55	194.895	9.74502			194.975	620.464	480.188	539.669	671.827	564.503	523.478	576.376	503.115	637.863	568.609	64.4188
	204.875	184.087	186.614	189.958	200.853	182.466	200.235	195.21	205.003	187.59	206.735	185.293	199.222	182.93	193.593	183.952	192.249	8.42874			204.875	665.162	503.935	544.876	740.049	584.359	578.564	572.071	468.035	646.965	589.335	83.8213
	215.05	187.891	180.531	187.421	209.927	174.52	210.247	184.157	204.288	182.314	188.436	195.904	202.403	194.588	187.054	184.914	191.64	10.8602			215.05	639.34	495.078	563.176	749.615	553.683	656.451	594.617	459.338	627.266	593.174	87.869
	225.225	187.102	179.68	180.282	200.165	163.374	201.017	194.341	199.071	185.044	194.157	185.304	199.112	191.827	193.06	176.121	188.644	10.5856			225.225	641.417	520.348	560.628	745.776	593.176	629.084	578.138	443.124	610.726	591.38	83.8804
	235.125	186.773	180.164	171.145	205.725	168.495	199.684	192.773	203.54	183.989	192.934	198.819	193.135	188.935	204.897	174.365	189.691	12.1174			235.125	637.914	547.604	584.393	781.315	610.405	651.175	599.564	380.797	677.973	607.905	108.164
	245.025	175.07	188.361	184.466	198.51	166.036	196.346	198.927	196.765	175.933	206.071	189.007	191.211	183.128	191.7	181.933	188.231	10.6755			245.025	558.833	566.767	625.271	788.015	525.39	622.699	586.845	382.243	654.541	590.067	108.712
	254.925	189.396	184.789	187.628	204.005	175.445	210.701	184.611	208.741	183.526	187.345	197.329	209.917	187.107	187.505	182.417	192.031	11.2106			254.925	591.599	591.264	734.622	783.806	511.666	667.335	664.392	379.371	640.105	618.24	120.327
	264.825	181.958	192.457	186.118	204.567	163.594	204.082	190.994	202.175	174.188	181.645	178.036	185.132	189.435	183.037	195.601	187.535	11.3968			264.825	613.593	607.194	705.979	875.206	481.564	638.437	670.282	379.907	592.579	618.304	138.352
	275	180.682	176.342	189.448	186.168	156.803	202.73	177.681	200.955	171.47	177.621	175.257	187.956	182.814	183.25	183.689	182.191	11.2271			275	584.211	663.992	664.431	768.572	510.173	606.471	685.299	345.644	591.299	602.233	120.948
	285.175	185.296	177.305	181.49	190.503	157.321	207.198	179.604	193.962	169.949	174.618	190.065	182.259	186.207	193.47	190.466	183.981	11.7268			285.175	496.293	603.733	545.448	740.738	464.879	563.334	698.782	329.767	535.063	553.115	122.664
	295.075	179.512	174.647	203.789	192.199	153.728	192.943	184.873	198.566	169.085	181.324	171.656	188.154	174.094	182.2	188.49	182.351	12.6934			295.075	535.557	607.91	516.887	832.849	432.819	614.982	678.813	304.975	557.44	564.692	148.895
	304.975	187.005	169.816	177.508	194.211	149.243	186.48	170.99	177.587	171.892	178.639	169.836	171.182	177.216	184.008	180.174	176.386	10.3939			304.975	572.073	561.654	616.558	817.802	433.404	590.001	685.183	312.172	533.425	569.141	143.082
	314.875	182.285	182.779	178.141	180.502	150.714	188.319	166.989	172.57	167.487	165.229	174.403	172.691	159.293	177.249	183.905	173.504	10.1632			314.875	541.892	553.842	591.931	827.483	405.934	618.938	685.152	340.345	499.271	562.754	144.773
	325.05	177.046	178.061	178.917	181.081	153.852	184.125	169.698	166.014	168.659	173.898	184.596	174.057	158.487	176.741	174.196	173.295	8.75212			325.05	536.301	608.679	481.797	728.783	386.303	586.389	639.704	371.96	491.348	536.807	117.253
	335.225	179.11	169.308	172.294	174.486	162.479	186.906	162.897	164.908	168.292	166.665	162.947	168.628	166.63	177.012	173.062	170.375	6.87176			335.225	522.127	574.835	578.933	720.902	419.918	503.658	674.087	364.735	461.58	535.642	115.212
	345.125	175.229	168.528	179.432	169.074	150.396	174.806	158.686	176.683	159.639	164.271	160.754	174.722	168.832	168.954	167.337	167.823	7.95446			345.125	452.488	511.432	578.978	816.022	386.167	503.972	607.41	351.293	472.373	520.015	137.966
	355.025	168.991	167.904	175.567	165.674	147.546	175.43	156.736	167.985	163.042	169.599	162.867	172.426	164.567	166.395	172.188	166.461	7.23874			355.025	477.475	475.852	525.192	647.631	348.246	470.263	607.822	364.916	462.271	486.63	98.1846
	364.925	169.041	158.859	173.083	163.846	147.693	174.29	155.476	171.15	165.644	157.178	158.757	165.457	157.96	166.594	157.285	162.821	7.44633			364.925	399.709	457.804	528.615	669.295	309.793	440.523	537.536	406.817	458.665	467.64	102.109
	374.825	170.09	155.392	157.867	161.744	142.358	176.183	157.454	169.983	165.687	154.639	167.077	165.284	178.585	170.414	157.144	163.327	9.43018			374.825	376.416	563.896	503.834	647.805	328.617	570.374	607.334	378.524	420.149	488.55	115.658
	385	163.844	160.697	161.789	167.247	138.337	178.337	159.029	169.193	159.375	158.728	159.155	163.33	167.493	173.166	161.748	162.764	8.83847			385	401.466	499.8	653.718	780.223	247.831	378.026	487.615	335.945	381.313	462.882	165.486
	395.175	160.055	149.18	166.649	163.676	138.951	168.228	156.209	165.45	158.205	166.364	159.071	155.882	161.438	168.795	156.063	159.614	7.94548			395.175	354.884	497.819	413.747	597.047	306.585	449.216	522.577	298.451	426.909	429.693	99.9347
	405.075	156.629	149.834	170.331	164.256	139.527	168.722	157.663	168.681	152.362	159.82	159.199	161.021	174.56	167.686	157.49	160.519	9.05931			405.075	330.564	450.549	441.301	640.592	311.315	501.926	471.336	325.393	434.005	434.109	104.02
	414.975	163.025	152.025	164.382	168.6	131.231	164.393	155.316	169.26	148.39	162.039	154.948	156.559	151.556	161.751	152.303	157.052	9.63659			414.975	447.698	440.444	356.192	555.758	290.055	398.417	604.165	305.892	417.141	423.973	104.786
	424.875	159.954	149.323	172.505	165.342	134.539	160.669	151.061	167.361	153.155	161.801	148.91	158.224	160.511	159.999	148.778	156.809	9.37845			424.875	396.093	439.012	366.802	592.812	265.49	364.401	488.219	283.769	399.82	399.602	100.291
	435.05	156.99	148.046	153.699	155.885	130.103	162.418	154.834	158.737	151.929	154.25	145.687	156.818	158.61	161.008	150.881	153.326	7.87302			435.05	318.796	457.43	326.585	576.089	271.449	430.907	471.058	262.432	391.538	389.587	104.187
	445.225	157.184	154.851	151.474	150.704	128.415	162.201	153.114	162.355	153.658	155.205	152.367	163.07	151.397	158.09	143.728	153.187	8.56146			445.225	360.976	458.771	399.781	444.2	259.47	340.952	343.43	274.716	466.455	372.083	76.2106
	455.125	157.265	150.452	158.456	161.636	128.099	156.764	153.69	167.144	149.623	155.188	142.445	152.845	164.279	158.006	146.298	153.479	9.58101			455.125	437.865	391.452	264.106	453.825	239.612	294.645	375.803	292.795	427.925	353.114	81.2164
	465.025	155.602	147.271	158.723	154.729	126.998	155.984	150.036	162.174	148.871	155.221	139.865	150.908	151.318	157.159	149.114	150.932	8.549			465.025	280.73	348.411	406.262	468.488	256.786	289.54	505.678	224.872		347.596	102.954
	474.925	153.851	150.385	149.102	157.771	126.283	156.376	151.792	157.962	155.347	152.935	140.258	153.536	148.612	157.879	146.693	150.585	8.28237			474.925	293.085	332.937	381.921	374.894	242.727	308.837	464.289	261.095		332.473	72.5845
	484.825	148.281	152.523	148.878	158.561	129.038	152.587	151.875	165.028	149.168	155.678	144.117	155.856	153.972	154.686	157.851	151.873	8.05301			484.825	282.045	333.346	280.713	438.11	234.025	368.939	354.121	239.371		316.334	70.1596
	495	147.813	156.023	159.819	160.455	131.916	151.528	150.359	148.716	143.693	153.011	144.066	155.77	153.223	156.611	156.798	151.32	7.41342			495	254.391	319.194	286.098	476.807	236.967	384.001	395.992	239.915		324.171	87.082
	505.175	148.536	158.483	149.277	157.724	132.951	153.91	149.942	149.423	142.393	165.217	146.955	151.981	152.579	151.028	147.671	150.538	7.32911			505.175	256.377	327.933	245.397	390.555	252.923	333.73	355.943	228.95		298.976	60.2238
	515.075	146.696	154.097	150.325	152.359	135.521	152.859	156.619	146.829	145.795	150.805	147.089	151.562	156.941	144.343	150.492	149.489	5.41688			515.075	242.726	300.031	230.011	367.492	263.681	322.1	315.528	237.196		284.846	49.1204
	524.975	145.898	150.254	151.401	152.136	135.241	161.447	149.661	147.17	148.686	148.437	143.894	150.66	147.771	146.842	151.612	148.741	5.4513			524.975	250.61	321.623	227.397	413.795	267.042	288.048	338.517	199.311		288.293	68.5375
	534.875	143.701	146.604	154.315	149.917	136.103		145.947	144.377	147.523	148.005	145.982		145.132	146.039	154.262	146.762	4.64152			534.875	278.844	258.256	239.551	464.53	243.957	287.51	410.489	197.437		297.572	91.7222
	545.05	145.062	142.487	146.648	148.747	135.987		146.857	143.458	147.677	147.792	146.55		148.884	147.616	149.787	145.965	3.65388			545.05	243.125	294.33	240.016	352.242	220.1	304.399	469.667	199.313		290.399	87.9812
	555.225	144.462	156.656	147.15	157.74	135.722		150.701			148.137	142.845		149.472	145.691	146.167	147.704	6.14469			555.225	217.373	291.88	283.864	349.622	220.812	283.88	403.214	207.641		282.286	68.4725
	565.125	143.96	150.579	145.631	151.878	136.164		151.598			148.605	142.415		144.024	142.913	147.129	145.9	4.71314			565.125	250.741	255.59	347.953	338.242	231.136	293.379	378.639	219.471		289.394	59.4209
	575.025	147.733	148.541		155.579	137.475					148.492	143.015		142.091	140.01	153.913	146.317	6.14304			575.025	256.14	242.334	297.951	360.902	231.387	300.538	347.622	194.3		278.897	58
	584.925	150.721	151.541		156.583	143.076					145.675			140.657	139.253	156.473	147.997	6.81906			584.925	292.901	220.367	269.266	345.344	221.938	301.775	318.707	192.458		270.344	53.943
	594.825	154.045	152.994		160.155						144.201			138.324	142.231	160.824	150.396	8.89597			594.825		229.838	245.592	292.295	239.117	264.556		190.786		243.698	34.0973
	605		157.96		161.423						142.192			139.03	143.031	161.431	150.845	10.4892			605			248.603	243.775	202.88	250.93		211.73		231.584	22.5314
	615.175		156.637											138.772	145.09		146.833	9.05954			615.175			240.995		201.751	257.524		190.412		222.67	31.7744
	625.075		155.899											139.213	145.02		146.711	8.4707			625.075			277.291		194.813			176.324		216.143	53.7567
	634.975		153.127											138.437	138.75		143.438	8.39237			631.675			282.207		185.41			175.751		214.456	58.8722
	644.875		146.448											140.848	138.2		141.832	4.21118
	655.05		146.181											141.479	137.781		141.814	4.21012
	665.225		144.713											145.93	139.464		143.369	3.43605
	675.125		151.919											140.986			146.453	7.73114
	685.025		147.425											138.084			142.755	6.60531
