# Supplementary material for: The AUX1-AFB1-CNGC14 module establishes a longitudinal root surface pH profile
Source: eLife. 2023 Jul 14;12:e85193. doi: 10.7554/eLife.85193 (PMC10414970; doi:10.7554/eLife.85193)
Supplement: Figure 5—figure supplement 1—source data 1. [file elife-85193-fig5-figsupp1-data1.xlsx]

## Sheet: S5b
t	2	4	6	8	10	12	14	16	18	20	22	24	26	28	30	32	34	36	38	40	42	44
col	1.00344	1.06423	1.0827	1.12753	1.13133	1.13449	1.11693	1.11628	1.10187	1.08922	1.08487	1.08128	1.07431	1.08792	1.08459	1.08285	1.07008	1.0693	1.06788	1.06184	1.07833	1.07051
col	0.993121	1.02167	1.07111	1.08272	1.08944	1.11568	1.09921	1.07751	1.06483	1.05784	1.06849	1.07159	1.07	1.06198	1.07968	1.07949	1.07361	1.08038	1.08127	1.0824	1.08968	1.0835
col	1.00541	1.02463	1.06508	1.08207	1.06634	1.04835	1.05813	1.04764	1.06697	1.05098	1.04987	1.0553	1.04719	1.04947	1.04911	1.05912	1.04922	1.05263	1.03958	1.04484	1.03394	1.03226
col	1.01907	1.0714	1.08055	1.07777	1.08248	1.08519	1.0773	1.07177	1.06631	1.05901	1.06112	1.05619	1.04797	1.05738	1.05125	1.04406	1.03008	1.03967	1.0327	1.03618	1.02848	1.01797
fc	1.0429	1.10269	1.07811	1.07202	1.10076	1.08002	1.07362	1.06331	1.04775	1.0299	1.0188	1.06278	1.06545	1.07351	1.04522	1.03111	1.03995	1.02426	1.04762	1.05174	1.01447	1.08386
fc	1.03395	1.05588	1.07576	1.06503	1.05857	1.07783	1.06936	1.06602	1.06104	1.058	1.09617	1.03861	1.04273	1.03736	1.02352	1.04559	1.04032	1.03067	1.01617	1.02278	1.03454	1.02923
fc	1.0368	1.04018	1.07081	1.04792	1.05929	1.0725	1.05432	1.01777	1.04684	1.03706	1.04616	1.03119	1.00913	1.05297	1.03852	1.03574	1.03755	1.03851	1.04535	1.01817	1.06273	1.00561
fc	1.027	1.00875	1.03866	1.04037	1.04086	1.02179	1.02138	1.00092	0.983553	0.979142	0.980257	0.967378	0.986811	0.975665	0.972386	0.969526	0.970445	0.970251	0.969164	0.956611	0.98157	0.955541
fc	1.04991	1.0153	1.09349	1.06954	1.10602	1.05397	1.0248	1.05015	1.01763	1.0502	1.01506	1.03477	1.01302	1.01229	1.02384	0.994591	1.02589	1.01035	1.01694	0.985793	1.02719	1.01109
col	0.986583	1.05562	1.08963	1.09097	1.07023	1.04049	1.08405	1.07322	1.08915	1.10911	1.11248	1.1004	1.09568	1.10134	1.10602	1.10146	1.10942	1.10851	1.09843	1.09113	1.10091	1.06287
col	1.03432	1.07024	1.08612	1.08334	1.09579	1.10193	1.08509	1.07959	1.07905	1.07871	1.05852	1.06912	1.06976	1.07261	1.06825	1.06603	1.07656	1.07887	1.0718	1.07432	1.06871	1.05986
col	1.06072	1.08651	1.11471	1.10011	1.09531	1.10388	1.1111	1.10206	1.11093	1.10352	1.09095	1.10653	1.10434	1.12505	1.11304	1.11251	1.10571	1.09767	1.10231	1.10728	1.09304	1.09202
col	0.978724	1.02519	1.0367	1.01924	1.00216	1.01987	1.06233	1.06471	1.0578	1.05728	1.06024	1.06307	1.06994	1.06819	1.06853	1.07267	1.07886	1.09346	1.08021	1.08913	1.08187	1.09779
col	0.974552	1.03968	1.07245	1.05432	1.03176	1.04658	1.05914	1.05603	1.05627	1.0626	1.06292	1.05565	1.05937	1.07501	1.07603	1.08688	1.09169	1.07907	1.08768	1.09261	1.07643	1.07178
fc	0.95103	1.08078	1.02712	1.03653	1.01002	1.05951	1.03356	1.00567	1.05972	1.02515	1.03576	1.00813	1.05028	1.00567	1.03076	1.01982	0.99074	0.976071	1.02766	0.991539	0.984281	0.98846
fc	0.974121	1.07071	1.02614	1.03232	1.05313	1.0006	1.01228	1.04101	1.00549	1.02885	1.01576	0.975137	1.02308	0.977672	1.01627	0.999096	1.05751	0.959901	0.943592	0.99751	0.981523	0.947898
fc	1.00817	1.0593	1.05604	1.07534	1.04478	1.04831	1.07141	1.06472	1.06898	1.0547	1.06809	1.0813	1.00137	1.05504	1.08459	1.02757	1.05426	1.06004	1.05691	1.07053	1.02094	1.06533
fc	1.00601	1.02668	1.04555	1.02555	1.04045	1.01855	0.995163	1.01386	0.990499	1.00657	0.985033	0.970548	1.0027	0.987736	0.977167	0.978394	0.996093	0.976707	0.96385	0.97019	0.982172	0.970567
fc	1.08558	1.1983	1.11638	1.129	1.12315	1.15365	1.07813	1.14008	1.04685	1.09655	1.10674	1.03411	1.06284	1.10728	1.07698	1.05826	1.10353	1.03913	1.04781	1.09079	1.03565	1.00371
col	0.925566	0.951558	0.954493	0.966667	0.989504	0.996694	0.99416	1.00103	1.00712	1.00123	1.00879	1.00916	1.01367	1.01694	1.02272	1.01782	1.01735	1.01307	1.01398	1.00726	1.00727	1.01212
col	0.959812	0.984326	1.00372	1.03185	1.04658	1.04678	1.04972	1.04037	1.03727	1.02867	1.01505	1.02216	1.0187	1.01359	1.01517	1.01094	1.00865	1.00113	0.999305	0.990457	0.987433	0.984128
col	0.975921	1.00921	1.05187	1.05985	1.04321	1.04113	1.05859	1.07514	1.06481	1.05753	1.05489	1.0545	1.05238	1.06365	1.0514	1.0522	1.05802	1.05591	1.0547	1.04968	1.06056	1.05258
col	1.00207	1.06418	1.0548	1.08063	1.07206	1.07228	1.06229	1.06596	1.06496	1.05687	1.05194	1.06239	1.05734	1.05177	1.04833	1.04344	1.04156	1.02773	1.02603	1.0218	1.01568	1.01947
fc	1.01525	1.01693	1.02245	1.02272	1.01602	1.06642	1.08487	1.02448	1.02212	1.02282	1.00825	0.994358	1.01293	1.01068	1.01648	1.01904	1.03666	1.0316	1.03203	1.02132	1.0289	1.01648
fc	1.01264	1.00997	1.02887	1.07373	1.04307	1.0775	1.11169	1.10223	1.09592	1.09267	1.08284	1.08219	1.09753	1.07272	1.09087	1.08508	1.08943	1.08656	1.04788	1.07778	1.08066	1.04516
fc	1.00008	1.00485	1.03883	1.05689	1.04339	1.02679	1.00423	1.00955	1.00601	0.996792	0.999158	0.973023	0.978198	0.991732	0.967845	0.982368	0.95381	0.971565	0.950002	0.965223	0.999444	0.957072
fc	1.08863	1.14901	1.14006	1.14801	1.12908	1.10109	1.09417	1.08999	1.09291	1.10953	1.10492	1.07037	1.09954	1.08563	1.06476	1.07046	1.09383	1.0935	1.08968	1.08824	1.05326	1.07196

## Sheet: S5c
t	2	4	6	8	10	12	14	16	18	20	22	24	26	28	30	32	34	36	38	40	42	44	46
col	0	0.476061	0.615142	1.63533	1.89946	2.67225	3.60724	4.60408	4.96045	5.89484	6.8073	8.10381	8.73279	9.73019	10.5081	11.3105	11.9314	12.4756	13.7672	14.6693	15.2611	16.084	17.1019
col	0	0.303363	0.370214	1.28806	1.51532	1.88578	2.69156	3.29948	3.98541	5.27655	5.96235	6.59022	7.84131	8.19765	8.75571	10.2611	10.9587	11.771	13.1139	13.1596	14.6196	14.666	16.8176
col	0	0.272383	0.591797	1.19852	2.29058	2.16028	3.06011	3.08857	3.93157	4.75456	4.86705	6.13703	7.12939	8.49959	9.22023	10.5249	10.892	11.7599	11.9924	12.5664	12.8854	13.8279	14.5076
col	0	2.17515	2.76211	3.66369	4.78636	6.02399	7.04807	7.93747	9.98848	10.7159	11.7819	12.5966	13.3481	14.5927	15.7409	16.7874	17.9422	19.4959	20.5096	21.8566	22.3194	23.2735	24.3659
fc	0	-0.203565	0.818668	0.849671	2.15535	2.95125	3.62818	4.01265	4.13505	4.74119	5.40091	5.36435	6.4639	6.28224	7.34636	7.55323	7.72896	8.69256	8.82963	8.77834	9.95331	10.2606	11.6704
fc	0	0.219113	0.538559	0.778156	0.835825	1.38041	1.54183	2.34026	2.64965	2.89771	3.28504	3.70631	4.12845	4.46522	4.63856	4.70798	5.21966	5.44381	5.66566	5.92032	6.44281	6.77118	7.48264
fc	0	-0.213318	-0.0397125	0.737001	1.06974	1.71005	2.45967	3.20995	3.40401	4.1786	4.81957	5.26857	5.99404	6.46394	6.5972	6.5452	7.6973	8.0335	8.55499	9.23821	9.68496	9.68644	10.2264
fc	0	1.13638	1.29924	1.57233	2.73658	3.61915	4.97415	5.2309	5.8143	6.68999	7.02595	7.34014	8.44413	8.91851	9.6625	10.1005	10.5308	10.8246	11.6993	11.9446	12.8605	12.5959	14.8145
fc	0	-0.0915204	2.59569	0.514049	2.09736	4.64208	5.75546	6.11878	5.37172	9.47567	7.65289	8.66062	8.58263	9.45501	10.8213	9.38419	10.7978	12.1171	13.0522	13.3202	14.3202	15.4293	14.3577
col	0	0.4345	0.940299	0.773992	0.766095	2.16089	2.31775	2.11932	3.07281	3.88558	4.17703	5.08042	5.98617	6.48035	7.65861	8.93139	9.70846	10.6959	11.6036	13.5043	14.0832	15.462	16.0515
col	0	0.00345436	0.217049	0.71955	0.470968	0.223305	0.515275	0.896865	1.14286	1.50036	1.85787	2.51592	3.46612	3.35853	4.3342	4.91848	5.62811	6.13437	6.40431	7.57509	8.88385	9.27052	10.0046
fc	0	-0.490038	0.297111	1.44303	2.59225	3.13522	3.40509	4.32235	4.50273	5.01159	5.91582	6.43439	7.33477	8.07872	9.38176	10.5132	11.4215	12.7764	13.8912	15.2312	15.8435	17.0571	17.9829
fc	0	0.880353	1.03284	1.48386	2.56852	3.12864	3.39771	3.85806	4.55442	5.29917	5.76288	7.33009	6.7651	8.25907	8.57012	8.96369	9.5536	11.1169	11.4794	12.1175	13.4847	14.3163	14.7073
fc	0	-0.613201	-0.297598	-0.022164	0.616816	1.25178	2.30876	2.43996	3.70571	4.32624	3.53041	4.6427	4.78362	4.70535	4.73704	5.37424	6.59295	7.22679	6.80924	7.43837	7.32369	8.24785	9.18004
col	0	0.0766753	0.362923	0.675292	0.878806	2.22853	2.16287	3.61875	4.4511	5.6236	6.36877	6.89518	7.92913	8.52948	8.78583	10.3429	10.6031	11.344	11.4293	12.2037	13.2282	13.598	13.9017
col	0	0.253274	1.46299	2.32685	1.75709	2.88809	3.90625	4.14348	4.87625	5.20262	6.68232	7.62645	7.29632	9.25129	9.88851	12.0691	12	12.4756	13.4905	14.2338	15.0888	15.9824	16.3436
fc	0	-0.0260831	0.40553	0.939043	1.81171	2.88114	3.09409	3.62159	4.20828	3.65033	4.29565	5.05141	5.40612	5.82577	6.46592	6.79286	6.4837	7.66255	7.9218	8.55317	9.08477	9.79618	11.0387
col	0	0.253274	1.46299	2.32685	1.75709	2.88809	3.90625	4.14348	4.87625	5.20262	6.68232	7.62645	7.29632	9.25129	9.88851	12.0691	12	12.4756	13.4905	14.2338	15.0888	15.9824	16.3436

## Sheet: S5e
t	2	4	6	8	10	12	14	16	18	20	22	24	26	28	30	32	34	36	38	40	42	44
col	1.09384	1.08753	1.08419	1.08265	1.09205	1.06615	1.0195	1.03049	1.06511	1.04155	1.10375	1.101	1.10567	1.10868	1.12485	1.12206	1.10635	1.09346	1.11707	1.11015	1.11413	1.10433
col	1.08164	1.12045	1.10447	1.14117	1.13796	1.10671	1.1012	1.08185	1.07302	1.08163	1.10738	1.12125	1.10919	1.13727	1.12224	1.1407	1.1321	1.14837	1.12911	1.12369	1.14057	1.12471
col	1.03917	1.07744	1.07712	1.07813	1.0816	1.05383	1.04871	1.05153	1.05304	1.0486	1.06263	1.07087	1.07362	1.08016	1.09579	1.09901	1.09096	1.09775	1.09707	1.08919	1.08645	1.08311
col	1.07661	1.10957	1.1184	1.16308	1.16653	1.14667	1.1302	1.11102	1.10219	1.10801	1.13548	1.11538	1.13854	1.1615	1.1558	1.14771	1.15451	1.16302	1.17607	1.16696	1.17006	1.16048
col	1.06633	1.08194	1.075	1.11643	1.1119	1.06873	1.04731	1.06366	1.06648	1.07052	1.08877	1.08054	1.08645	1.09703	1.09491	1.09869	1.1019	1.11455	1.09573	1.1033	1.11696	1.11072
pp2c	1.01111	1.03137	1.02289	1.0321	1.03461	1.04578	1.0279	1.045	1.04174	1.03297	1.03476	1.03002	1.03269	1.04501	1.03252	1.04732	1.04295	1.04449	1.04839	1.0469	1.05484	1.05331
pp2c	1.05247	1.06016	1.07307	1.06832	1.08194	1.10591	1.08727	1.09874	1.10082	1.10019	1.08459	1.1	1.09984	1.10554	1.1049	1.0952	1.12025	1.09082	1.11444	1.10623	1.10218	1.10129
pp2c	1.03636	1.07359	1.07092	1.07984	1.08486	1.06514	1.06852	1.07649	1.09346	1.07368	1.09491	1.09354	1.09401	1.11319	1.10304	1.1241	1.10072	1.09769	1.10779	1.10297	1.09907	1.09022
pp2c	1.07041	1.05457	1.06832	1.07563	1.09203	1.06038	1.06815	1.06848	1.0631	1.07265	1.07209	1.07208	1.06965	1.08744	1.09228	1.06339	1.10253	1.08884	1.08856	1.0976	1.09513	1.07868
pp2c	1.04918	1.01334	1.02281	1.02077	1.04693	1.01111	1.03014	1.00773	1.01587	1.03179	1.04099	1.03967	1.03039	1.04634	1.04789	1.04459	1.03039	1.05216	1.05042	1.03863	1.05917	1.0487
pp2c	1.06841	1.07778	1.08263	1.08599	1.10053	1.1064	1.09745	1.12947	1.14486	1.11793	1.1073	1.11989	1.1319	1.13113	1.1558	1.14064	1.14534	1.14283	1.13531	1.1388	1.13621	1.13339
aha	1.15667	1.04031	1.07551	1.06986	1.08065	1.02347	1.05558	1.00573	1.01764	1.03642	1.02918	1.00402	1.0156	0.993553	1.013	1.00851	1.03762	1.00977	0.972661	0.962643	1.01566	0.979235
aha	1.07714	1.07552	1.02697	1.02098	0.984012	0.96757	0.99764	1.02015	0.92269	1.00237	0.986539	0.96405	0.975269	0.991465	0.969736	0.955463	0.977642	0.948742	0.980257	0.970252	0.948266	0.966835
aha	1.10149	1.08027	1.07199	1.10286	1.09191	1.02951	1.10366	1.07781	1.04329	1.09087	1.08178	1.04838	1.06738	1.10839	1.06051	1.08722	1.07084	1.08352	1.05618	1.02038	1.01039	1.06629
aha	1.12921	1.09605	1.09416	1.1355	1.10351	1.11107	1.11377	1.08005	1.10112	1.0802	1.11073	1.12214	1.10014	1.11488	1.09855	1.1109	1.0907	1.10708	1.05924	1.10131	1.08832	1.07837
aha	1.08269	1.07147	1.09161	1.09583	1.10147	1.08369	1.10512	1.09219	1.07508	1.08398	1.11073	1.09824	1.11435	1.11679	1.11063	1.10934	1.10895	1.12275	1.1185	1.11438	1.11327	1.09882
aha	1.08613	1.10883	1.12507	1.10963	1.09552	1.07198	1.08917	1.09288	1.10431	1.1151	1.12702	1.11998	1.11956	1.12427	1.12826	1.10368	1.10545	1.1228	1.11938	1.11892	1.10703	1.09627
aha	1.09333	1.09104	1.07409	1.07987	1.07826	1.05852	1.02744	1.0494	1.02316	1.07114	1.07523	1.0428	1.04098	1.10382	1.03023	1.05598	1.04802	1.06593	1.06675	1.06772	1.05604	1.04424
aha	1.07309	1.09274	1.10417	1.0952	1.04016	1.08775	1.05353	1.02871	1.04838	1.01991	1.05532	1.05957	1.06003	1.06532	1.02059	1.05605	1.05158	1.04225	1.01986	1.05018	1.03203	1.01589
aha	1.0063	1.03091	1.08629	1.02918	1.04502	1.06898	1.00719	0.987894	1.07472	1.06806	1.01001	1.0553	1.06251	1.08417	1.01787	1.05424	1.14121	0.993777	1.0313	1.04583	1.05308	1.03864
aha	1.12677	1.12616	1.14386	1.13515	1.09404	1.08707	1.11183	1.10018	1.11211	1.09692	1.10943	1.08542	1.12163	1.09753	1.10808	1.08933	1.0998	1.09953	1.07474	1.07924	1.08429	1.08941
col	1.11257	1.12437	1.11954	1.13033	1.12675	1.09487	1.1214	1.13765	1.14228	1.16732	1.15971	1.15727	1.17651	1.17155	1.16507	1.14821	1.15636	1.15881	1.15428	1.14073	1.13691	1.13457
col	1.0171	1.04257	1.04181	1.0569	1.03952	1.04473	1.03923	1.04188	1.05141	1.05057	1.06373	1.07821	1.07099	1.07665	1.06487	1.06507	1.07031	1.06563	1.07103	1.07265	1.06733	1.05765
col	1.07899	1.10402	1.09059	1.10806	1.09934	1.10593	1.09456	1.11213	1.08895	1.10226	1.10552	1.09696	1.09956	1.10014	1.08759	1.06472	1.08068	1.06874	1.05874	1.068	1.07772	1.05088
col	1.00973	1.0733	1.07248	1.08645	1.08677	1.06221	1.07217	1.08857	1.05842	1.08984	1.06782	1.07229	1.06205	1.09374	1.08134	1.079	1.07692	1.06403	1.05751	1.06498	1.0534	1.0626
col	1.06794	1.14205	1.10233	1.11097	1.08994	1.1149	1.10101	1.11238	1.10135	1.09527	1.09755	1.08961	1.07495	1.0554	1.06519	1.06651	1.06163	1.07649	1.06662	1.07621	1.04899	1.05208
aha	1.0721	1.0707	1.09796	1.10922	1.09165	1.08229	1.05761	1.02694	1.05804	1.07828	1.07868	1.03364	1.04162	1.08386	1.08089	1.0334	1.0896	1.0279	1.06681	1.07177	0.991115	1.04442
aha	1.08932	1.1377	1.12023	1.13275	1.07045	1.08599	1.1036	1.04949	1.09943	1.04753	1.04357	1.05807	1.04997	1.06119	1.05403	1.04777	1.07452	1.02259	1.03503	1.04254	1.0284	1.02508
aha	1.07403	1.03446	1.09538	1.07627	1.03415	1.05432	1.07367	1.01199	1.05703	1.04939	1.00509	1.02195	1.00823	1.04134	1.02166	1.06159	1.00715	1.0726	0.998443	1.03918	1.02079	1.01311
aha	1.16629	1.05093	1.12313	1.04103	1.08697	1.10621	1.00177	1.11429	1.04486	1.03046	1.07354	1.05278	1.03383	1.06944	1.08139	1.03038	1.07858	1.04081	1.04513	1.05315	1.06831	1.0459
aha	1.22564	1.23415	1.18176	1.23311	1.18842	1.15574	1.15369	1.14146	1.07574	1.13437	1.12138	1.10451	1.14591	1.12008	1.10581	1.14634	1.13944	1.094	1.13058	1.07541	1.09237	1.09353
pp2c	1.00745	1.02898	1.04351	1.02584	1.04153	1.03265	1.03511	1.05072	1.06589	1.03676	1.02691	1.05607	1.04227	1.05027	1.0415	1.0557	1.05791	1.03931	1.04213	1.03233	1.04113	1.03666
pp2c	1.00893	1.01847	1.02339	1.02361	1.02743	1.02514	1.01758	1.01821	1.02826	1.02797	1.01653	1.0226	1.03305	1.02244	1.0315	1.02856	1.03268	1.03548	1.02144	1.03644	1.03434	1.03143
pp2c	1.04828	1.06647	1.06636	1.05882	1.07906	1.08166	1.06901	1.0781	1.08085	1.06852	1.05395	1.04969	1.07247	1.06332	1.07391	1.07666	1.0479	1.05793	1.06877	1.05284	1.05479	1.0585
pp2c	1.02585	1.02844	1.02657	1.04597	1.04438	1.0405	1.04049	1.04268	1.05325	1.04326	1.04574	1.04369	1.03181	1.03979	1.04879	1.03489	1.04676	1.0461	1.03452	1.04254	1.04316	1.03599
pp2c	1.01365	1.0551	1.05934	1.04529	1.05475	1.05777	1.08323	1.06821	1.06847	1.08162	1.0847	1.07661	1.05692	1.08203	1.06845	1.05785	1.06806	1.07649	1.06327	1.05552	1.06568	1.06267
pp2c	1.09148	1.07024	1.10936	1.10561	1.1214	1.11483	1.10851	1.11991	1.11193	1.09064	1.09643	1.11988	1.11264	1.10128	1.11361	1.11355	1.09829	1.10318	1.1162	1.1037	1.09062	1.08925
pp2c	1.03105	1.02907	1.04513	1.0403	1.06241	1.04993	1.05671	1.03133	1.04845	1.05226	1.04448	1.04056	1.03518	1.0294	1.04717	1.04156	1.03501	1.04091	1.04765	1.0298	1.04004	1.03733

## Sheet: S5f
t	2	4	6	8	10	12	14	16	18	20	22	24	26	28	30	32	34	36	38	40	42	44	46
col	0	0.108201	0.239075	1.3428	0.656159	1.11896	1.51403	1.43116	2.37823	2.17435	3.07225	3.50289	5.48239	5.57146	6.43111	7.87026	8.51292	9.51725	9.49326	10.4286	11.9803	12.6292	14.5545
col	0	0.965863	1.18066	1.19807	1.46504	1.83281	2.04662	2.59066	3.60733	3.16831	3.45226	5.02417	4.84134	5.80382	6.72052	7.0729	8.13535	9.16171	9.74168	11.2621	11.4196	13.4916	14.1535
col	0	0.352347	0.856488	0.593024	0.653524	1.10133	0.911985	0.976224	0.84461	-0.106749	1.01182	0.715309	1.09673	1.16891	1.30902	1.68165	2.19933	2.5037	2.32186	3.08757	3.32195	3.61294	4.46266
col	0	0.268782	0.025116	-0.120031	0.389978	0.866388	0.573493	1.24184	1.83573	1.45933	1.65006	2.41527	2.86641	3.13865	4.05952	4.40702	4.47851	4.73038	5.49916	6.19224	6.40542	7.26832	8.14208
col	0	0.0704191	-0.32491	0.318357	0.45857	0.532137	0.92892	2.07916	1.73425	2.01224	2.66443	3.31635	3.7051	5.14782	5.44289	6.97451	7.13549	6.83291	8.99065	9.97925	11.04	11.14	13.4393
col	0	0.04546	-0.128798	0.470071	1.14907	0.535107	1.04744	1.54463	1.62178	1.38336	2.45399	2.92039	3.35961	3.65286	4.19905	4.54299	5.48762	5.89042	6.76379	7.37782	8.37407	9.32251	10.1164
col	0	0.317482	0.74952	1.3767	1.90162	3.18296	4.21367	4.72445	6.06719	6.66567	7.99061	8.48096	9.12151	9.79246	10.6547	11.1232	12.1094	12.6272	12.2086	13.5775	14.4736	14.7229	15.5335
col	0	-0.0576561	0.113271	1.04836	1.61154	2.42579	3.35677	4.18804	5.03877	5.96067	6.64927	7.51522	8.78005	8.83411	9.686	11.3395	12.4632	13.155	13.0297	14.7048	15.1106	16.6334	15.9618
col	0	0.295984	1.66328	1.93383	1.91574	3.4636	4.43995	5.8642	6.55883	8.01988	9.40907	10.6308	11.3885	12.8499	14.3308	15.3187	15.864	16.5724	17.5612	18.8781	19.6437	19.1122	21.6713
aha	0	0.616988	1.33068	2.40254	2.43229	3.20938	4.15048	4.10294	4.37485	5.45583	5.42277	5.6245	6.17642	7.01271	7.66923	8.51513	8.7312	8.98344	9.35667	9.74032	10.5808	12.0816	12.3224
aha	0	-0.0896578	0.523014	1.54072	2.10309	3.09108	3.6904	3.43641	4.14661	4.66011	5.28486	5.86691	6.29517	6.63947	7.41136	7.40967	7.7597	8.75521	9.08925	9.51895	9.50267	10.0498	10.8625
aha	0	0.782545	0.695255	2.10544	1.69546	2.43536	2.52047	3.09258	3.95606	4.00219	5.00219	5.67738	5.69824	6.46856	6.78424	7.57938	8.3398	8.71963	10.2797	10.7181	10.9073	11.1212	11.9383
aha	0	0.739441	0.861136	1.52187	1.31922	1.77449	2.47169	3.05147	4.03144	4.24441	5.01907	5.58233	5.90543	6.44743	7.60709	8.61763	10.0312	10.1842	10.829	11.9884	12.4941	13.5456	14.4626
aha	0	0.196779	0.955022	1.17841	1.31875	2.00564	2.77615	3.41296	4.14115	4.79652	5.59265	6.39498	7.43109	8.0548	8.93647	9.81815	11.6459	11.7532	11.9078	12.6293	13.5673	14.6037	15.4042
aha	0	0.376116	0.207099	0.364106	0.756043	1.03882	1.67048	2.26582	2.59173	3.03527	3.35608	4.21986	4.66224	5.50486	6.31417	7.04898	7.74564	8.15471	8.57792	9.50615	10.6289	10.6443	11.5622
aha	0	0.464464	1.3866	2.15448	2.92666	3.08165	4.21442	4.04139	5.17363	5.17881	5.5843	6.84933	7.35966	7.83908	8.80248	8.82484	10.3196	10.5775	11.3538	11.7012	12.4765	13.8374	14.2474
aha	0	2.0688	2.09489	1.77138	2.05778	2.42002	2.96106	2.48812	3.30575	2.74132	3.78326	4.18137	4.63565	4.38384	4.77581	5.33383	5.92991	6.21138	6.67181	8.09696	8.62422	9.21468	9.187
aha	0	1.26512	2.05271	1.98838	2.75818	3.9717	4.26509	4.75964	5.32158	6.16306	7.00921	7.75699	8.82602	10.017	10.1782	10.3147	11.1339	12.3702	12.7358	13.5622	14.9007	15.1065	16.2209
aha	0	-1.00111	-1.18479	-0.223369	0.130383	1.01148	0.763599	1.62758	1.72758	1.91965	2.23501	2.72942	2.85561	3.03899	3.22598	4.34983	3.99373	4.64691	4.4801	4.63989	4.90322	4.73236	6.53956
aha	0	-0.99892	0.458908	0.44978	1.04095	2.95635	2.99682	3.53656	5.281	5.67571	5.03134	6.38539	5.80194	7.13785	7.64034	8.98442	10.2708	9.54176	11.0783	11.5479	12.6987	12.6586	14.7075
aha	0	-0.436508	0.120946	0.589062	0.379709	1.5776	1.74169	2.04214	2.1438	2.57206	3.32707	3.42651	3.36436	3.37774	2.92085	3.41658	3.41719	4.49633	4.67063	4.67063	5.3149	4.79937	5.97775
aha	0	0.391369	1.06895	1.00301	1.4831	1.90425	2.24485	2.29152	2.76909	3.30495	3.51858	3.47875	3.64281	3.61773	3.68436	3.53848	3.68413	3.60604	3.61791	3.74654	4.00191	3.95381	3.95074
aha	0	0.237245	0.591073	1.57986	2.02463	2.37632	3.88263	3.3176	4.59265	4.98692	6.2906	6.9107	7.15181	7.09708	7.84046	9.15507	9.34388	9.90923	11.0115	10.3263	10.7572	11.832	11.8832
pp2c	0	0.265828	0.172347	0.383996	0.782272	0.81268	0.597032	0.682589	0.816063	0.946816	1.21829	1.51412	1.75432	1.69916	1.64261	2.44917	2.13274	2.50974	2.81677	3.27528	3.34285	3.2949	4.31579
pp2c	0	0.450366	0.357781	0.91317	0.642309	0.371208	0.47274	0.717201	1.3453	1.59746	1.37351	2.35204	1.45934	1.66439	3.22009	3.69778	3.13705	5.12714	5.02015	4.5124	5.61937	6.43161	6.76364
pp2c	0	-0.459866	0.440933	-0.220414	0.861707	0.247234	1.41008	0.653896	0.913584	1.26081	1.19545	1.95745	1.70453	2.872	2.89702	2.92358	4.19936	5.07878	5.87278	6.69045	6.26301	7.18558	8.12848
pp2c	0	0.534003	0.103919	0.27121	0.807349	0.946314	0.390182	0.99304	0.108234	1.04297	1.37227	1.14874	1.74596	2.15218	2.90222	3.41952	3.91442	4.53502	4.71431	5.24678	5.55972	6.49832	7.04327
pp2c	0	0.336488	0.427775	0.719727	1.49966	1.61342	1.90948	2.37803	2.59452	2.97415	3.33093	3.86043	4.54617	4.67528	5.70606	6.24028	6.70809	6.95891	7.44725	8.44736	9.09585	9.9861	11.066
pp2c	0	0.871346	0.160993	0.549297	0.46981	0.8739	1.37325	1.54659	1.88355	2.39917	2.26197	2.70418	3.19532	3.21044	3.57128	4.84359	4.96548	5.84115	6.65387	7.07122	8.07421	8.70955	9.93968
pp2c	0	0.0064205	0.517631	1.34753	2.10339	2.308	3.97632	4.61033	4.72593	6.1472	6.91725	7.34467	8.65628	9.15577	10.3783	10.6197	11.3216	12.7678	13.2924	13.8259	14.4754	15.3534	16.235
pp2c	0	0.0606333	1.04467	1.01979	2.78157	2.32696	2.61548	2.67885	2.90733	3.5806	1.12074	4.12709	3.76913	3.48532	5.63722	5.90271	4.2523	4.03008	3.91897	3.80786	5.01932	4.36451	5.03782
pp2c	0	0.542812	0.448499	1.277	1.42476	2.07839	2.56245	4.09735	4.1879	4.53465	5.78937	5.9267	6.41021	7.15238	7.33431	8.225	8.2797	8.47043	9.56129	10.3433	11.3996	12.2884	12.5501
pp2c	0	0.25366	0.586927	1.5762	0.863834	1.67719	1.51205	1.9443	2.08724	2.0843	2.44281	3.50139	3.24185	4.30739	3.62144	5.23969	5.2073	5.1992	5.84208	5.85043	6.27428	7.02097	6.90792
pp2c	0	-0.988001	-0.124393	0.573685	0.216874	1.11089	0.991413	1.1608	1.66229	2.51731	3.34149	2.93324	3.83037	4.70937	5.04943	5.57693	6.09528	7.22234	7.54183	8.32548	8.61651	9.19035	9.74795
pp2c	0	0.475882	0.659676	0.369353	0.992431	2.2801	2.4582	3.0665	2.61464	3.97912	4.7462	5.33457	5.50277	6.04041	7.06579	7.85379	7.85971	9.02266	9.16516	10.3951	11.3135	12.1942	13.6776

## Sheet: S5h
t	2	4	6	8	10	12	14	16	18	20	22	24	26	28	30	32	34	36	38	40	42	44
col	1.03292	1.04508	1.05308	1.06455	1.06266	1.06808	1.08177	1.0724	1.07283	1.06831	1.07252	1.05562	1.04851	1.05435	1.06123	1.07057	1.0651	1.0783	1.06426	1.07389	1.06681	1.05595
col	0.980807	0.989218	0.986091	0.986022	0.989166	0.987122	0.991804	0.992906	0.993735	1.00219	0.994916	0.993426	1.00122	0.989216	0.993141	1.00178	0.997466	1.00037	0.997872	1.00106	0.998472	0.995918
col	1.01035	1.05196	1.04112	1.05498	1.04682	1.05531	1.04977	1.04672	1.07575	1.07443	1.09208	1.08487	1.08845	1.10124	1.09097	1.09773	1.07826	1.09824	1.07788	1.0922	1.09029	1.08066
aux	1.05195	1.0564	0.996911	1.05497	1.05477	1.0012	1.0544	1.05285	1.02278	1.02786	1.00559	1.00815	1.02477	1.06288	1.005	1.0065	1.00587	1.0141	1.01308	1.01302	1.01387	1.01051
aux	1.00456	1.00658	1.00511	1.00611	1.0068	1.00734	1.00799	1.00785	1.00915	1.01127	1.00981	1.00926	1.01065	1.01208	1.01258	1.01301	1.00895	1.0093	1.01018	1.00875	1.00988	1.01129
pin	0.992337	0.985122	0.981127	0.980336	0.975926	0.978491	0.978392	0.982611	0.981744	0.985237	0.982654	0.985159	0.985007	0.98551	0.986803	0.981756	0.98264	0.976866	0.974539	0.974481	0.976952	0.975574
col	0.993481	1.01988	1.01845	1.0295	1.043	1.05274	1.04701	1.0504	1.05651	1.05736	1.06638	1.05042	1.05447	1.05805	1.06709	1.06045	1.0713	1.06825	1.06023	1.0562	1.05085	1.04989
col	1.01253	1.04196	1.03711	1.05124	1.06511	1.07227	1.09699	1.1045	1.10618	1.10317	1.09367	1.09851	1.1022	1.12223	1.12962	1.12467	1.11598	1.1363	1.11663	1.12188	1.12432	1.11479
col	1.00433	1.04935	1.04477	1.04192	1.03586	1.06341	1.06285	1.07753	1.07311	1.06759	1.08038	1.08982	1.07162	1.07557	1.07357	1.0805	1.07463	1.08074	1.06501	1.06748	1.04907	1.04796
aux	0.970323	0.956157	0.955614	0.956375	0.951345	0.962585	0.963531	0.965419	0.953281	0.957112	0.951555	0.963841	0.955075	0.965883	0.962943	0.969262	0.971005	0.978441	0.977337	0.973652	0.984627	0.982662
aux	0.943788	0.945211	0.948628	0.951992	0.956245	0.958313	0.951813	0.952889	0.950168	0.951	0.946231	0.952063	0.954889	0.957559	0.95789	0.962452	0.963275	0.965335	0.963911	0.96583	0.966585	0.969908
pin	0.982922	0.980371	0.984063	0.98157	0.985381	0.983749	0.988466	0.98926	0.994853	0.990494	0.994012	1.0071	1.00105	1.00624	1.01174	1.01062	1.00866	1.01499	1.00596	1.00826	1.01055	1.00789
pin	0.971258	0.978589	0.983221	0.988423	0.9894	0.992599	0.995046	0.989394	0.985742	0.984302	0.991351	0.988352	0.981751	0.982468	0.97543	0.966993	0.966773	0.975454	0.980198	0.981064	0.973952	0.972979
col	1.01781	1.0376	1.05508	1.05431	1.05417	1.031	1.02503	1.03411	1.02502	1.02577	1.02113	1.03617	1.02216	1.02736	1.0343	1.02233	1.03982	1.02569	1.03547	1.03341	1.03471	1.03367
col	1.07998	1.0919	1.07684	1.08343	1.09574	1.08861	1.07105	1.05976	1.07033	1.06674	1.07206	1.06558	1.06925	1.08521	1.06198	1.06598	1.06019	1.06577	1.05918	1.06776	1.08499	1.06194
col	1.05138	1.06418	1.05989	1.06605	1.0759	1.0663	1.05599	1.06691	1.07383	1.05259	1.05057	1.06349	1.06869	1.07108	1.07029	1.06019	1.04696	1.06051	1.04407	1.06137	1.05909	1.06297
col	1.05477	1.05963	1.05244	1.07093	1.064	1.05898	1.04939	1.0572	1.05355	1.04859	1.04605	1.0637	1.046	1.04973	1.04877	1.04524	1.05335	1.04611	1.05188	1.03651	1.05612	1.05547
aux	0.969843	0.967003	0.971089	0.974804	0.973377	0.969204	0.967645	0.969235	0.9691	0.967038	0.96416	0.964801	0.965853	0.962849	0.957885	0.964535	0.96922	0.966897	0.971163	0.968541	0.968071	0.963015
pin	1.01555	1.0147	1.01849	1.02239	1.02674	1.0269	1.03321	1.04047	1.02933	1.0196	1.02377	1.02002	1.0227	1.01736	1.01956	1.02402	1.02683	1.02418	1.02551	1.02204	1.02108	1.02429
pin	1.00058	0.997879	1.00038	0.999319	1.00724	1.01715	1.01022	1.00855	1.01145	1.00685	1.01441	1.01124	1.01108	1.00914	1.01123	1.01055	1.00661	1.00569	1.00383	1.00938	1.00646	1.00583

## Sheet: S5i
t	2	4	6	8	10	12	14	16	18	20	22	24	26	28	30	32	34	36	38	40	42	44	46
aux	0	-0.0695262	-0.143855	0.546969	-0.633729	-0.0151092	0.467345	-0.595113	-0.509731	-0.716047	-1.10478	-0.321107	-0.444588	-0.551974	-1.34008	-1.05549	-1.28047	-1.33763	-0.306175	-0.386378	-1.29813	-1.84876	-1.3424
aux	0	0.153378	0.136745	0.238192	0.470783	0.798342	0.647277	0.694046	0.905098	0.886372	1.18392	1.06345	1.66341	1.02627	1.33641	1.95324	2.02472	2.83439	3.0391	3.5524	3.64281	3.84717	3.52129
col	0	0.254514	-0.279031	-0.220014	1.59842	1.30762	1.71894	2.05131	3.09916	3.05521	4.16851	5.59138	5.78864	6.27666	7.66189	8.11275	9.13921	10.1314	10.5781	11.7866	12.7978	13.4593	14.2484
col	0	0.249003	0.741085	0.681286	1.30575	1.7491	1.7593	2.00168	2.32582	2.08638	2.94367	3.58238	2.73292	3.76535	4.53454	5.35546	5.56085	7.49684	8.57974	8.48814	9.51191	9.85385	11.0102
col	0	-0.224052	-0.28021	-0.117817	-0.695016	-0.835103	0.197645	0.62959	0.442157	0.605992	0.86108	1.13089	2.57889	4.82788	4.5709	5.04834	5.04569	6.31823	7.22388	9.11529	8.33782	10.8777	13.0454
pin	0	-0.351796	-0.0582591	-0.517505	-0.647076	0.221778	0.509854	0.131941	1.81356	0.255497	0.379234	1.32847	0.508448	0.862128	1.93094	1.42248	2.17932	1.92002	2.52449	2.79135	2.85586	2.84894	2.88479
aux	0	-0.109684	0.460131	-2.31508	-0.241663	-2.04136	-0.0143872	0.362995	-0.568079	-0.370278	-1.06892	-4.27499	-3.48613	-4.43505	-2.12994	-4.18766	-7.21717	-9.53938	1.3504	1.14479	1.67325	-0.349806	1.34233
aux	0	-0.0241583	0.197119	-0.0775412	0.109398	0.188079	0.849228	0.681111	0.728521	0.327463	0.292206	1.29749	1.29576	1.26282	0.350377	0.547643	0.938702	0.876451	0.0407146	0.0459581	0.0583779	0.909307	0.781133
col	0	0.30933	0.296862	0.59579	0.309197	0.621403	0.972027	0.872104	1.4725	1.35784	1.84877	2.00066	2.27477	2.39454	3.31068	3.69598	4.21542	4.91805	5.24063	6.15392	6.92294	8.10744	8.66573
col	0	0.0077177	0.283234	0.215567	0.760735	0.0868901	0.269936	1.16632	1.68907	2.28454	2.38005	2.23941	2.10174	2.97611	3.40988	3.90722	4.84385	4.67958	6.3404	6.71779	7.16502	9.07254	9.08375
col	0	0.713796	0.942756	1.33924	1.42298	2.05372	2.4227	2.8422	3.79751	3.47872	4.58336	4.43718	4.71197	5.59464	6.07067	7.22918	8.15631	8.30682	8.78902	8.99558	9.48757	9.89361	10.4563
pin	0	0.00136896	-0.07835	-0.235593	-0.153704	-0.386934	-0.24862	-0.56182	-0.547489	-0.444701	-0.242452	-0.804335	-0.577621	-1.03685	-0.977311	-0.936543	-0.413718	-0.329036	-0.299351	-0.31547	-0.278052	-0.462888	-0.358369
pin	0	-0.560827	-0.186137	0.326377	0.390448	-0.00806226	0.100786	-1.51027	-0.296727	1.322	0.482677	0.562706	2.22055	0.647532	4.43627	4.28175	4.23392	2.02856	2.31141	4.47392	5.842	5.94989	5.45736
aux	0	0.134608	-0.052248	0.213278	0.191522	0.0739913	-0.305806	0.295257	0.748269	0.295206	0.371179	0.30748	0.787966	0.650254	0.821983	0.96685	0.931638	0.852376	0.677419	1.80714	1.73052	1.83843	2.19346
col	0	0.501616	2.08144	2.51409	3.28747	3.12278	3.93132	4.11826	4.8548	5.64078	6.59114	7.55849	7.69883	8.20755	8.6904	8.64358	10.149	10.0044	11.1169	12.3332	12.5187	13.1179	14.1114
col	0	0.510562	0.936241	1.39964	1.63478	2.3271	2.62838	3.08088	3.44533	3.77299	4.05298	4.63753	4.74937	5.46665	5.5034	6.25571	6.51008	6.22652	6.75962	7.42661	7.44596	8.32728	7.91595
col	0	1.48728	1.52599	1.2523	1.02865	1.57512	2.08102	2.22818	2.77211	4.10188	3.95769	3.80087	5.11841	4.10013	5.68918	4.98212	5.16297	8.10078	7.22632	7.19589	7.3054	7.55584	8.77179
col	0	0.3539	-0.0274515	0.542015	0.689659	1.44957	1.70307	1.86068	2.37641	1.78893	2.82448	3.69297	4.04037	4.1337	4.64691	5.15107	5.34162	5.23289	5.99844	5.92786	6.59807	7.04463	7.60681
pin	0	-0.223192	-0.991341	-0.588952	-1.05662	-1.41771	-1.29902	-1.28907	-1.10346	-1.88554	-1.54231	-1.50954	-1.89228	-1.80668	-2.25968	-2.28227	-2.31257	-2.21911	-2.89247	-2.69848	-2.79958	-2.6408	-3.58219
pin	0	-1.00869	-1.72303	-1.08002	-1.94224	-1.52068	-1.88458	-2.75369	-3.08572	-2.87457	-3.26756	-2.95116	-3.23815	-3.74834	-4.08748	-3.59145	-3.96173	-4.33571	-3.80502	-4.63819	-4.16821	-4.68978	-4.61839
