# Supplementary material for: The AUX1-AFB1-CNGC14 module establishes a longitudinal root surface pH profile
Source: eLife. 2023 Jul 14;12:e85193. doi: 10.7554/eLife.85193 (PMC10414970; doi:10.7554/eLife.85193)
Supplement: Figure 5—source data 1. [file elife-85193-fig5-data1.xlsx]

## Sheet: 5a
pH
t in min	2	4	6	8	10	12	14	16	18	20	22	24	26	28	30	32	34	36	38	40	42	44
Col	1.00344	1.06423	1.0827	1.12753	1.13133	1.13449	1.11693	1.11628	1.10187	1.08922	1.08487	1.08128	1.07431	1.08792	1.08459	1.08285	1.07008	1.0693	1.06788	1.06184	1.07833	1.07051
Col	0.993121	1.02167	1.07111	1.08272	1.08944	1.11568	1.09921	1.07751	1.06483	1.05784	1.06849	1.07159	1.07	1.06198	1.07968	1.07949	1.07361	1.08038	1.08127	1.0824	1.08968	1.0835
Col	1.00541	1.02463	1.06508	1.08207	1.06634	1.04835	1.05813	1.04764	1.06697	1.05098	1.04987	1.0553	1.04719	1.04947	1.04911	1.05912	1.04922	1.05263	1.03958	1.04484	1.03394	1.03226
Col	1.01907	1.0714	1.08055	1.07777	1.08248	1.08519	1.0773	1.07177	1.06631	1.05901	1.06112	1.05619	1.04797	1.05738	1.05125	1.04406	1.03008	1.03967	1.0327	1.03618	1.02848	1.01797
Col	0.986583	1.05562	1.08963	1.09097	1.07023	1.04049	1.08405	1.07322	1.08915	1.10911	1.11248	1.1004	1.09568	1.10134	1.10602	1.10146	1.10942	1.10851	1.09843	1.09113	1.10091	1.06287
Col	1.03432	1.07024	1.08612	1.08334	1.09579	1.10193	1.08509	1.07959	1.07905	1.07871	1.05852	1.06912	1.06976	1.07261	1.06825	1.06603	1.07656	1.07887	1.0718	1.07432	1.06871	1.05986
Col	1.06072	1.08651	1.11471	1.10011	1.09531	1.10388	1.1111	1.10206	1.11093	1.10352	1.09095	1.10653	1.10434	1.12505	1.11304	1.11251	1.10571	1.09767	1.10231	1.10728	1.09304	1.09202
Col	0.978724	1.02519	1.0367	1.01924	1.00216	1.01987	1.06233	1.06471	1.0578	1.05728	1.06024	1.06307	1.06994	1.06819	1.06853	1.07267	1.07886	1.09346	1.08021	1.08913	1.08187	1.09779
Col	0.974552	1.03968	1.07245	1.05432	1.03176	1.04658	1.05914	1.05603	1.05627	1.0626	1.06292	1.05565	1.05937	1.07501	1.07603	1.08688	1.09169	1.07907	1.08768	1.09261	1.07643	1.07178
angles
t in min	2	4	6	8	10	12	14	16	18	20	22	24	26	28	30	32	34	36	38	40	42	44
Col	0	0.4345	0.940299	0.773992	0.766095	2.16089	2.31775	2.11932	3.07281	3.88558	4.17703	5.08042	5.98617	6.48035	7.65861	8.93139	9.70846	10.6959	11.6036	13.5043	14.0832	15.462
Col	0	0.00345436	0.217049	0.71955	0.470968	0.223305	0.515275	0.896865	1.14286	1.50036	1.85787	2.51592	3.46612	3.35853	4.3342	4.91848	5.62811	6.13437	6.40431	7.57509	8.88385	9.27052
Col	0	0.0766753	0.362923	0.675292	0.878806	2.22853	2.16287	3.61875	4.4511	5.6236	6.36877	6.89518	7.92913	8.52948	8.78583	10.3429	10.6031	11.344	11.4293	12.2037	13.2282	13.598
Col	0	0.253274	1.46299	2.32685	1.75709	2.88809	3.90625	4.14348	4.87625	5.20262	6.68232	7.62645	7.29632	9.25129	9.88851	12.0691	12	12.4756	13.4905	14.2338	15.0888	15.9824
Col	-2.32685	-2.07357	-0.863853	-2.84217e-14	-0.569759	0.561247	1.5794	1.81664	2.5494	2.87577	4.35547	5.2996	4.96947	6.92445	7.56166	9.74229	9.67319	10.1487	11.1637	11.9069	12.7619	13.6555

## Sheet: 5b
pH
t	2	4	6	8	10	12	14	16	18	20	22	24	26	28	30	32	34	36	38	40	42	44
col	1.03292	1.04508	1.05308	1.06455	1.06266	1.06808	1.08177	1.0724	1.07283	1.06831	1.07252	1.05562	1.04851	1.05435	1.06123	1.07057	1.0651	1.0783	1.06426	1.07389	1.06681	1.05595
col	0.980807	0.989218	0.986091	0.986022	0.989166	0.987122	0.991804	0.992906	0.993735	1.00219	0.994916	0.993426	1.00122	0.989216	0.993141	1.00178	0.997466	1.00037	0.997872	1.00106	0.998472	0.995918
col	1.01035	1.05196	1.04112	1.05498	1.04682	1.05531	1.04977	1.04672	1.07575	1.07443	1.09208	1.08487	1.08845	1.10124	1.09097	1.09773	1.07826	1.09824	1.07788	1.0922	1.09029	1.08066
aux	1.05195	1.0564	0.996911	1.05497	1.05477	1.0012	1.0544	1.05285	1.02278	1.02786	1.00559	1.00815	1.02477	1.06288	1.005	1.0065	1.00587	1.0141	1.01308	1.01302	1.01387	1.01051
aux	1.00456	1.00658	1.00511	1.00611	1.0068	1.00734	1.00799	1.00785	1.00915	1.01127	1.00981	1.00926	1.01065	1.01208	1.01258	1.01301	1.00895	1.0093	1.01018	1.00875	1.00988	1.01129
col	0.993481	1.01988	1.01845	1.0295	1.043	1.05274	1.04701	1.0504	1.05651	1.05736	1.06638	1.05042	1.05447	1.05805	1.06709	1.06045	1.0713	1.06825	1.06023	1.0562	1.05085	1.04989
col	1.01253	1.04196	1.03711	1.05124	1.06511	1.07227	1.09699	1.1045	1.10618	1.10317	1.09367	1.09851	1.1022	1.12223	1.12962	1.12467	1.11598	1.1363	1.11663	1.12188	1.12432	1.11479
col	1.00433	1.04935	1.04477	1.04192	1.03586	1.06341	1.06285	1.07753	1.07311	1.06759	1.08038	1.08982	1.07162	1.07557	1.07357	1.0805	1.07463	1.08074	1.06501	1.06748	1.04907	1.04796
aux	0.970323	0.956157	0.955614	0.956375	0.951345	0.962585	0.963531	0.965419	0.953281	0.957112	0.951555	0.963841	0.955075	0.965883	0.962943	0.969262	0.971005	0.978441	0.977337	0.973652	0.984627	0.982662
aux	0.943788	0.945211	0.948628	0.951992	0.956245	0.958313	0.951813	0.952889	0.950168	0.951	0.946231	0.952063	0.954889	0.957559	0.95789	0.962452	0.963275	0.965335	0.963911	0.96583	0.966585	0.969908
col	1.01781	1.0376	1.05508	1.05431	1.05417	1.031	1.02503	1.03411	1.02502	1.02577	1.02113	1.03617	1.02216	1.02736	1.0343	1.02233	1.03982	1.02569	1.03547	1.03341	1.03471	1.03367
col	1.07998	1.0919	1.07684	1.08343	1.09574	1.08861	1.07105	1.05976	1.07033	1.06674	1.07206	1.06558	1.06925	1.08521	1.06198	1.06598	1.06019	1.06577	1.05918	1.06776	1.08499	1.06194
col	1.05138	1.06418	1.05989	1.06605	1.0759	1.0663	1.05599	1.06691	1.07383	1.05259	1.05057	1.06349	1.06869	1.07108	1.07029	1.06019	1.04696	1.06051	1.04407	1.06137	1.05909	1.06297
col	1.05477	1.05963	1.05244	1.07093	1.064	1.05898	1.04939	1.0572	1.05355	1.04859	1.04605	1.0637	1.046	1.04973	1.04877	1.04524	1.05335	1.04611	1.05188	1.03651	1.05612	1.05547
aux	0.969843	0.967003	0.971089	0.974804	0.973377	0.969204	0.967645	0.969235	0.9691	0.967038	0.96416	0.964801	0.965853	0.962849	0.957885	0.964535	0.96922	0.966897	0.971163	0.968541	0.968071	0.963015
angles
t	2	4	6	8	10	12	14	16	18	20	22	24	26	28	30	32	34	36	38	40	42	44	46
aux	0	-0.0695262	-0.143855	0.546969	-0.633729	-0.0151092	0.467345	-0.595113	-0.509731	-0.716047	-1.10478	-0.321107	-0.444588	-0.551974	-1.34008	-1.05549	-1.28047	-1.33763	-0.306175	-0.386378	-1.29813	-1.84876	-1.3424
aux	0	0.153378	0.136745	0.238192	0.470783	0.798342	0.647277	0.694046	0.905098	0.886372	1.18392	1.06345	1.66341	1.02627	1.33641	1.95324	2.02472	2.83439	3.0391	3.5524	3.64281	3.84717	3.52129
col	0	0.254514	-0.279031	-0.220014	1.59842	1.30762	1.71894	2.05131	3.09916	3.05521	4.16851	5.59138	5.78864	6.27666	7.66189	8.11275	9.13921	10.1314	10.5781	11.7866	12.7978	13.4593	14.2484
col	0	0.249003	0.741085	0.681286	1.30575	1.7491	1.7593	2.00168	2.32582	2.08638	2.94367	3.58238	2.73292	3.76535	4.53454	5.35546	5.56085	7.49684	8.57974	8.48814	9.51191	9.85385	11.0102
col	0	-0.224052	-0.28021	-0.117817	-0.695016	-0.835103	0.197645	0.62959	0.442157	0.605992	0.86108	1.13089	2.57889	4.82788	4.5709	5.04834	5.04569	6.31823	7.22388	9.11529	8.33782	10.8777	13.0454
aux	0	-0.109684	0.460131	-2.31508	-0.241663	-2.04136	-0.0143872	0.362995	-0.568079	-0.370278	-1.06892	-4.27499	-3.48613	-4.43505	-2.12994	-4.18766	-7.21717	-9.53938	1.3504	1.14479	1.67325	-0.349806	1.34233
aux	0	-0.0241583	0.197119	-0.0775412	0.109398	0.188079	0.849228	0.681111	0.728521	0.327463	0.292206	1.29749	1.29576	1.26282	0.350377	0.547643	0.938702	0.876451	0.0407146	0.0459581	0.0583779	0.909307	0.781133
col	0	0.30933	0.296862	0.59579	0.309197	0.621403	0.972027	0.872104	1.4725	1.35784	1.84877	2.00066	2.27477	2.39454	3.31068	3.69598	4.21542	4.91805	5.24063	6.15392	6.92294	8.10744	8.66573
col	0	0.0077177	0.283234	0.215567	0.760735	0.0868901	0.269936	1.16632	1.68907	2.28454	2.38005	2.23941	2.10174	2.97611	3.40988	3.90722	4.84385	4.67958	6.3404	6.71779	7.16502	9.07254	9.08375
col	0	0.713796	0.942756	1.33924	1.42298	2.05372	2.4227	2.8422	3.79751	3.47872	4.58336	4.43718	4.71197	5.59464	6.07067	7.22918	8.15631	8.30682	8.78902	8.99558	9.48757	9.89361	10.4563
aux	0	0.134608	-0.052248	0.213278	0.191522	0.0739913	-0.305806	0.295257	0.748269	0.295206	0.371179	0.30748	0.787966	0.650254	0.821983	0.96685	0.931638	0.852376	0.677419	1.80714	1.73052	1.83843	2.19346
col	0	0.501616	2.08144	2.51409	3.28747	3.12278	3.93132	4.11826	4.8548	5.64078	6.59114	7.55849	7.69883	8.20755	8.6904	8.64358	10.149	10.0044	11.1169	12.3332	12.5187	13.1179	14.1114
col	0	0.510562	0.936241	1.39964	1.63478	2.3271	2.62838	3.08088	3.44533	3.77299	4.05298	4.63753	4.74937	5.46665	5.5034	6.25571	6.51008	6.22652	6.75962	7.42661	7.44596	8.32728	7.91595
col	0	1.48728	1.52599	1.2523	1.02865	1.57512	2.08102	2.22818	2.77211	4.10188	3.95769	3.80087	5.11841	4.10013	5.68918	4.98212	5.16297	8.10078	7.22632	7.19589	7.3054	7.55584	8.77179
col	0	0.3539	-0.0274515	0.542015	0.689659	1.44957	1.70307	1.86068	2.37641	1.78893	2.82448	3.69297	4.04037	4.1337	4.64691	5.15107	5.34162	5.23289	5.99844	5.92786	6.59807	7.04463	7.60681

## Sheet: 5c
pH
t	2	4	6	8	10	12	14	16	18	20	22	24	26	28	30	32	34	36	38	40	42	44	46	48	50	52	54	56	58	60
Col	0.98821	1.00509	1.0239	1.01945	1.01447	1.02131	1.01682	1.01552	1.01751	1.01822	1.02188	1.02379	1.02704	1.02616	1.03159	1.02994	1.02398	1.02886	1.03311	1.02538	1.02634	1.0237	1.01467	1.02121	1.01625	1.01317	1.01987	1.0197	1.02392	1.02342
Col	1.03809	1.07283	1.08148	1.0827	1.09253	1.05603	1.0648	1.07519	1.08129	1.08013	1.07416	1.07564	1.05894	1.06704	1.06496	1.05395	1.051	1.04145	1.0534	1.03954	1.04126	1.04858	1.0532	1.04012	1.04455	1.04531	1.03573	1.03064	1.03706	1.0426
Col	0.987112	1.025	1.01499	1.01713	1.02134	1.03563	1.02497	1.02031	1.01575	1.02631	1.02857	1.03709	1.04245	1.04787	1.03929	1.04452	1.04465	1.0326	1.031	1.03504	1.03526	1.02914	1.02657	1.02471	1.01749	1.01447	1.02677	1.02537	1.02893	1.02239
Col	1.04603	1.06866	1.06087	1.06358	1.06739	1.06649	1.06033	1.05644	1.0604	1.05951	1.06703	1.05817	1.05448	1.05605	1.04455	1.04496	1.05357	1.04151	1.04545	1.0522	1.0599	1.06249	1.05864	1.05563	1.05081	1.04617	1.04612	1.05204	1.04809	1.05175
Col	1.01856	1.01945	1.03471	1.04128	1.04243	1.0494	1.05412	1.05187	1.02867	1.03776	1.04143	1.04233	1.04295	1.05029	1.05084	1.05134	1.05347	1.05248	1.057	1.05556	1.05387	1.05373	1.04979	1.0499	1.0484	1.05255	1.05464	1.04896	1.04997	1.05182
Col	0.971478	0.982112	1.01214	0.981128	0.992597	1.00043	1.00077	1.00293	1.00407	1.00932	1.02225	1.02134	1.02508	1.02791	1.03241	1.02953	1.03571	1.02636	1.02509	1.02218	1.02143	1.02668	1.02497	1.03112	1.02943	1.0274	1.02296	1.01902	1.02007	1.01666
Col	0.997322	1.02144	1.01593	1.02685	1.03394	1.02427	1.03289	1.03943	1.02878	1.06751	1.07692	1.0598	1.06895	1.0648	1.06626	1.05883	1.07287	1.06769	1.05426	1.06405	1.06916	1.05188	1.05615	1.05839	1.05287	1.06343	1.0489	1.04113	1.03824	1.04741
Col	1.0261	1.04519	1.06027	1.06488	1.06729	1.06294	1.05457	1.04639	1.03626	1.05215	1.05477	1.06349	1.06133	1.04617	1.04473	1.05257	1.04859	1.04659	1.05463	1.05087	1.04991	1.04808	1.04856	1.04833	1.04151	1.03704	1.03457	1.04063	1.0399	1.03958
Col	1.0005	1.0646	1.06924	1.06535	1.06135	1.04508	1.04929	1.0507	1.04111	1.06256	1.06982	1.06401	1.0544	1.06063	1.05625	1.0549	1.0583	1.06687	1.06345	1.06011	1.06211	1.06448	1.0607	1.0643	1.06004	1.07031	1.07373	1.06503	1.06855	1.07298
Col	1.01007	1.04942	1.08075	1.05739	1.05212	1.05418	1.03894	1.04533	1.05077	1.04433	1.05086	1.03886	1.04015	1.03964	1.04311	1.03985	1.0424	1.03884	1.04281	1.04396	1.038	1.03784	1.04337	1.04663	1.04554	1.04099	1.03581	1.04093	1.02538	1.03441
Col	0.975044	1.01858	1.00846	1.00044	0.994427	0.983191	0.994987	1.00412	1.00468	1.0099	1.01427	1.00049	0.993473	1.01382	1.01103	1.00221	1.00926	1.01937	1.00836	1.0088	1.01162	1.01565	1.01158	1.01523	1.01779	1.03208	1.03785	1.02344	1.02755	1.03213
afb1	0.954324	0.956285	0.957362	0.965484	0.97898	0.991562	0.997166	1.01007	1.01345	1.01608	1.01903	1.02286	1.0199	1.02478	1.02336	1.02328	1.02392	1.02325	1.02458	1.01839	1.02168	1.02158	1.02017	1.02207	1.0181	1.01635	1.01439	1.01042	1.00592	1.00361
afb1	1.04889	1.05212	1.0489	1.04243	1.04241	1.04352	1.05035	1.04763	1.04812	1.04362	1.04635	1.04546	1.04655	1.04885	1.05437	1.05859	1.05725	1.05736	1.06351	1.06208	1.06252	1.0577	1.0596	1.05734	1.05226	1.05058	1.05128	1.05197	1.05409	1.05283
afb1	1.00895	0.998236	0.995965	0.993151	0.999652	1.00735	1.0111	1.00622	1.01014	1.00926	1.01071	1.0046	1.00987	1.00967	1.01312	1.01616	1.01798	1.02031	1.02129	1.02671	1.03157	1.03401	1.03863	1.03713	1.03863	1.03828	1.04418	1.04532	1.04702	1.04747
afb1	1.02024	1.01137	1.00109	1.00598	1.01188	1.0167	1.01823	1.01546	1.0122	1.01291	1.01376	1.01585	1.02108	1.01996	1.02513	1.03045	1.03344	1.03611	1.03754	1.03903	1.0377	1.03596	1.03158	1.03097	1.03225	1.03229	1.02771	1.0264	1.02905	1.03784
afb1	1.04936	1.03351	1.0235	1.02246	1.02265	1.03011	1.02739	1.03547	1.03821	1.03401	1.03519	1.03433	1.03255	1.03279	1.0396	1.04099	1.04313	1.0486	1.04724	1.05115	1.05029	1.04987	1.0458	1.04531	1.04547	1.04681	1.04372	1.04535	1.05028	1.04549
afb1	1.0309	1.02949	1.01933	1.02525	1.02778	1.03225	1.0342	1.03845	1.04152	1.03342	1.03242	1.02842	1.02758	1.03255	1.03368	1.03324	1.02922	1.03367	1.03078	1.0345	1.03332	1.03528	1.02786	1.03503	1.03168	1.03351	1.02814	1.03046	1.02636	1.03091
afb1	1.01608	1.01356	1.0105	1.01246	1.01525	1.01884	1.01756	1.02439	1.02649	1.02334	1.02749	1.01405	1.02577	1.01821	1.02078	1.02245	1.02637	1.02933	1.02779	1.03324	1.0321	1.03551	1.03582	1.02984	1.02333	1.03647	1.03252	1.02657	1.02169	1.02259
afb1	1.00919	1.01163	0.999808	1.00975	1.01797	1.02097	1.0263	1.01763	1.0241	1.02344	1.02134	1.02041	1.02241	1.02828	1.02844	1.03002	1.03253	1.03367	1.03247	1.02997	1.02266	1.01856	1.02528	1.02924	1.02635	1.02938	1.02393	1.0291	1.03033	1.02526
afb1	0.99918	0.997688	0.997793	0.994611	1.0072	1.01318	1.01648	1.01991	1.02217	1.03352	1.03192	1.0246	1.0299	1.03349	1.04133	1.04317	1.03571	1.03225	1.0399	1.03877	1.02852	1.02408	1.03146	1.0204	1.03236	1.02736	1.02434	1.02726	1.0219	1.01825
afb1	0.99322	0.998096	0.989415	0.997322	1.00269	1.0021	1.00859	0.993399	0.997673	1.0001	0.994006	1.00627	0.996716	1.00989	1.0075	1.0074	1.006	1.00422	1.00456	0.996829	0.990854	0.983631	0.989822	0.999426	1.00296	0.993154	0.991684	1.00246	1.00845	1.00262
afb1	0.994035	1.00041	0.991604	1.00273	0.995519	0.989063	0.992237	0.974005	0.976031	0.967662	0.963257	0.982113	0.967778	0.977161	0.967515	0.965713	0.971315	0.97284	0.966016	0.959625	0.963376	0.960504	0.959632	0.979445	0.971525	0.966701	0.968118	0.975863	0.986838	0.984648
angles
t	2	4	6	8	10	12	14	16	18	20	22	24	26	28	30	32	34	36	38	40	42	44	46	48	50	52	54	56	58	60
Col	0	0.24369	0.496117	0.205755	0.862407	1.03564	1.66079	1.23882	2.37765	2.34519	3.27854	3.6055	4.45569	4.26477	5.46605	6.80069	7.8486	8.81119	9.6044	10.4814	11.3343	12.1889	12.4883	13.8092	14.149	15.2504	15.8884	16.9914	17.9347	18.6943
Col	0	0.190018	1.14899	0.678329	1.57398	1.98551	3.03145	3.21705	4.52507	5.1061	5.51745	6.51224	7.73585	8.15701	9.83916	10.4365	12.0225	13.206	14.8565	15.0116	16.2992	16.8448	17.5818	18.5444	19.2293	20.2711	21.3619	22.7065	23.5773	23.9363
Col	0	0.654247	0.48641	0.282077	1.01498	1.29515	1.53852	2.07539	2.14592	2.76621	3.08115	4.19609	4.8385	5.74476	6.40597	7.43852	8.60843	9.32616	10.12	11.1443	11.7469	12.9875	13.7826	15.1141	15.2642	16.1103	17.1061	18.2487	18.3629	19.3979
Col	0	0.0769294	0.389732	0.81381	1.25989	1.70508	2.21963	2.68061	2.91836	3.71723	4.10179	4.73727	5.55486	6.32071	6.64357	7.76713	8.17711	9.00356	9.7697	10.5277	11.1439	12.0797	12.5785	13.5215	14.115	14.7262	15.5092	16.1923	16.6031	17.5308
Col	0	-0.0394426	0.114331	0.077319	0.679175	0.385661	0.855636	1.71705	2.09965	2.34531	2.41849	3.49729	-0.0488396	4.67629	5.15111	6.17603	8.82965	9.15305	9.24048	6.21663	11.0239	11.2228	12.1999	13.8183	14.3972	15.3498	16.2268	17.3633	18.1956	19.1711
Col	0	0.163739	1.13548	1.68593	2.20615	2.51082	3.39454	3.91997	4.22722	4.65383	5.50045	5.9269	6.05026	7.47962	9.14333	9.41395	10.0116	10.8312	11.7574	12.2679	12.8405	14.0897	14.1401	15.6843	16.0703	16.4384	17.9563	17.0446	18.4374	18.7492
Col	0	-0.204077	0.375964	0.42043	0.266213	1.02332	1.20418	1.77106	2.08335	2.12239	2.04583	2.43864	3.09817	3.44791	3.76492	4.44623	4.65141	4.41687	5.37992	6.23811	6.27273	6.96021	8.03957	8.72835	8.91719	9.37675	8.82757	9.85137	11.2189	11.1079
Col	0	-0.109146	-0.158341	-0.0497088	0.430297	0.623987	1.25985	1.07735	2.45546	2.53266	2.95779	3.16217	4.30855	4.71695	5.47057	5.48071	5.41003	6.13995	8.15773	8.46108	8.98054	9.67684	10.3873	11.1579	12.6191	13.3674	14.9338	15.9037	17.2297	17.6849
Col	0	0.316531	0.361296	1.08722	1.6588	2.34255	2.98496	3.75377	4.70873	5.42772	6.27667	7.34641	8.08436	9.19885	9.63041	10.3082	11.39	12.1258	13.1052	13.6971	14.6292	15.6217	16.685	17.5478	18.8693	19.6832	20.3972	20.9891	22.7235	22.9374
afb1	0	-0.194813	-0.355267	0.220514	-0.171532	-0.0269698	0.38215	0.531462	0.236239	0.595756	0.169808	0.691448	0.825774	0.930384	0.973368	1.2009	1.08255	1.69297	1.43109	2.18008	2.47428	3.32829	3.19517	3.85462	4.82022	5.17233	5.70397	6.33797	7.09955	7.58312
afb1	0	0.524888	0.307498	0.407376	0.332	0.334839	0.204877	0.720709	0.904832	0.98388	1.16901	1.16925	1.33486	1.76943	1.77406	2.01918	2.40558	3.14565	3.76667	4.28081	4.38957	5.07254	5.40855	6.04262	6.34471	7.41333	7.93417	8.21486	8.86074	9.0136
afb1	0	-0.686156	-0.540447	-0.298278	-0.371059	-0.60287	-1.037	-1.12502	-0.803634	-0.91141	-1.06571	-0.83986	-1.2402	-1.44943	-1.05285	-1.1432	-1.30453	-1.37149	-1.11367	-0.688197	-0.936078	-0.524389	-0.352614	-0.240637	0.201526	0.442102	1.0198	1.48505	1.86208	2.42444
afb1	0	0.100233	-0.0978765	0.166375	0.204534	0.276512	0.308833	0.309218	0.432531	0.857269	1.32635	1.1289	1.38456	1.76601	2.08775	2.32826	2.39814	2.74552	3.4482	3.62012	4.58871	4.71535	5.31754	6.04247	6.5787	7.24697	7.20604	8.09304	8.689	9.28
afb1	0	-0.110979	-0.285446	-0.58668	-0.990473	-0.783045	-0.933468	-1.1087	-1.02224	-1.2079	-1.27412	-1.51948	-1.41978	-1.48558	-1.44298	-1.52994	-1.47977	-1.19649	-1.37349	-0.785623	-0.864071	-0.160966	0.186972	0.214327	0.649248	0.670142	1.14287	1.2296	1.82959	1.82077
afb1	0	0.891106	0.751128	1.05511	0.532042	0.645893	1.61043	1.66584	0.622825	1.13323	2.17712	1.25907	2.01935	1.11104	3.58506	3.87426	3.26346	4.47623	3.43783	3.87196	5.15174	5.95917	6.08565	6.00398	6.66899	7.12375	7.40831	8.19051	8.62692	9.16197
afb1	0	0.459384	1.03769	1.01492	0.9554	1.12188	2.0628	1.46139	1.32483	2.32724	2.32724	3.17673	3.0217	4.02903	3.71922	4.61903	5.10162	5.71564	6.56912	6.37995	7.63198	8.80836	9.04284	9.58044	10.1411	11.0886	11.2274	11.9879	12.5722	13.0948
afb1	0	0.679145	0.736936	0.490944	0.732374	1.22384	0.705	0.937648	1.65227	1.49887	1.07844	1.67999	2.03517	1.8793	1.81439	2.87261	3.78645	3.06466	3.63376	4.40006	5.16718	5.75867	6.45327	7.05369	7.10877	8.13244	7.85017	8.2674	8.94908	9.79147
afb1	0	0.0875157	-0.618445	-1.58093	-1.39852	-1.38281	-1.07633	-1.44762	-1.34047	-1.36242	-1.58588	-0.794839	-0.857398	-1.25275	-0.776093	-0.398974	0.409513	0.819468	1.17619	0.887875	1.41582	1.8731	2.36104	2.47363	2.70713	3.43972	4.23414	4.72694	5.17982	6.00961
afb1	0	-0.552481	-0.0183682	0.275252	0.557979	1.00044	1.19766	1.31665	1.82565	2.51439	2.69592	2.78803	3.87367	4.21431	4.10216	4.95789	5.2796	6.14023	6.05843	6.86138	7.14793	7.98626	8.35682	9.07228	9.73112	10.4091	10.7893	11.8695	12.2308	13.4133
afb1	0	-0.553472	-0.395392	-0.67877	-0.46491	-0.516264	-0.542767	-1.25943	-0.906028	-0.370036	-0.635477	-0.531769	0.0355934	0.714837	1.70262	1.45976	2.07656	2.621	3.00006	3.55995	4.034	4.44657	5.21409	5.57204	6.07129	6.56634	7.26782	8.47028	8.97327	9.86121

## Sheet: 5d
pH
t	2	4	6	8	10	12	14	16	18	20	22	24	26	28	30	32	34	36	38	40	42	44
col	0.990967	1.0182	1.08254	1.05571	1.07985	1.09031	1.10638	1.13265	1.13536	1.12182	1.14731	1.10648	1.11543	1.1423	1.12093	1.14643	1.13938	1.1401	1.13597	1.1469	1.13439	1.13177
cngc	0.994858	0.999352	0.984985	0.989999	0.988553	0.991588	0.994443	0.997428	1.014	1.00616	1.02041	1.00933	1.0065	1.01044	1.00347	1.01345	1.01476	1.0268	1.04028	1.04478	1.02876	1.01088
col	1.01803	1.0493	1.03872	1.03129	1.01472	1.04309	1.02676	1.03522	1.04958	1.0458	1.05597	1.06182	1.0554	1.05692	1.0515	1.04669	1.05759	1.05496	1.05367	1.05238	1.04113	1.05243
col	1.01252	1.00691	1.0407	1.02398	1.0286	1.02755	1.04086	1.05071	1.0416	1.06776	1.06591	1.07571	1.08923	1.06951	1.06211	1.0609	1.0709	1.0704	1.06844	1.09792	1.08451	1.08799
col	0.97345	1.00514	1.06273	1.04263	1.05833	1.07043	1.05217	1.0723	1.07801	1.03673	1.03643	1.03945	1.04802	1.04035	1.03216	1.03406	1.02196	1.03836	1.02448	1.02722	1.01346	1.0264
cngc	1.01255	0.972859	0.98654	0.979973	1.00635	1.01721	1.00207	1.01253	1.00729	1.02508	1.00682	1.01987	1.04038	1.02896	1.05992	1.03289	1.04337	1.03477	1.0514	1.04881	1.04466	1.04689
cngc	1.00449	1.02656	1.01789	1.01733	1.0507	1.03547	1.04867	1.0302	1.04524	1.03951	1.04429	1.04208	1.05438	1.04567	1.04495	1.02975	1.04904	1.04986	1.05247	1.03392	1.04566	1.04778
cngc	0.971811	0.987226	0.984072	0.978183	0.999353	1.01377	1.00548	1.01735	1.02075	1.02729	1.02864	1.03551	1.04003	1.02838	1.03807	1.03853	1.04733	1.03735	1.04576	1.05003	1.06422	1.04123
col	1.03116	1.02955	1.06855	1.07304	1.11164	1.08952	1.11351	1.10614	1.08332	1.0645	1.07017	1.07237	1.07127	1.07824	1.10512	1.09551	1.09094	1.09847	1.0792	1.07714	1.07574	1.08171
col	0.974255	1.03563	1.06515	1.08996	1.09994	1.11129	1.09909	1.11033	1.12161	1.09822	1.06842	1.0677	1.04365	1.06937	1.07359	1.05853	1.06569	1.06819	1.07036	1.07289	1.06191	1.03505
cngc	0.996849	1.00021	0.995394	0.998377	1.00899	1.01368	1.02481	1.02073	1.03095	1.02744	1.01494	1.02211	1.00617	1.01827	1.04054	1.04707	1.04721	1.04912	1.03841	1.06149	1.04866	1.04805
cngc	0.992776	0.992588	0.975185	0.996027	1.00079	1.01182	1.03858	1.02772	1.03973	1.02342	1.02647	1.04349	1.03233	1.0399	1.02929	1.03563	1.04548	1.04744	1.05399	1.05305	1.06937	1.0566
cngc	0.994093	0.979313	0.994154	0.985586	0.995478	1.00332	1.01412	1.03143	1.02651	1.02793	1.02379	1.03376	1.03486	1.02345	1.03306	1.02237	1.03938	1.02429	1.02616	1.03419	1.03951	1.02656
col	0.977038	1.02381	1.05734	1.04579	1.05415	1.05515	1.05558	1.05717	1.05712	1.06758	1.04695	1.04202	1.0463	1.05023	1.04907	1.07023	1.06228	1.04343	1.04166	1.06058	1.04826	1.03356
col	1.00337	1.06594	1.08714	1.08231	1.10296	1.10899	1.10387	1.1182	1.11198	1.11026	1.10229	1.10374	1.08915	1.09809	1.09868	1.09196	1.09129	1.08847	1.07907	1.08725	1.0928	1.06981
col	0.970024	1.01835	1.02699	1.02138	1.01673	1.05982	1.04944	1.03718	1.0676	1.04872	1.04994	1.03728	1.044	1.0412	1.03754	1.04982	1.04875	1.03479	1.04114	1.04166	1.02927	1.02628
cngc	1.02088	1.02454	1.01704	1.01732	1.02576	1.04393	1.04347	1.05498	1.06489	1.06599	1.05234	1.05343	1.05393	1.05442	1.04283	1.03818	1.06051	1.04109	1.04561	1.05981	1.05347	1.03714
col	1.00893	1.02474	1.0472	1.04165	1.05822	1.05785	1.07331	1.06665	1.07093	1.06538	1.08139	1.07813	1.07257	1.07166	1.09123	1.10038	1.09863	1.09437	1.09678	1.10262	1.08526	1.09483
col	1.04599	1.07048	1.07924	1.08737	1.08937	1.10524	1.1033	1.13891	1.12916	1.12946	1.1376	1.14567	1.14601	1.14429	1.14469	1.15855	1.16672	1.15915	1.16554	1.15388	1.14941	1.14716
col	0.991934	0.999232	1.00897	1.02021	1.03452	1.04443	1.04664	1.04001	1.05197	1.05033	1.04716	1.05356	1.06037	1.05269	1.05837	1.05816	1.05846	1.06277	1.08795	1.08727	1.09154	1.08742
cngc	1.01327	1.01255	0.987975	1.02435	1.02164	1.03499	1.04715	1.03633	1.02853	1.03586	1.029	1.03544	1.03984	1.03853	1.04599	1.04634	1.04809	1.05164	1.04438	1.04304	1.05165	1.03398
cngc	1.02836	1.01701	1.04024	1.00949	1.04616	1.0245	1.03449	1.03926	1.04481	1.05973	1.01636	1.0363	1.0275	1.03481	1.02472	1.0373	1.04098	1.0694	1.04338	1.07243	1.06138	1.04901
cngc	0.986236	0.998733	0.995024	1.03172	1.02878	1.04312	1.04913	1.02908	1.06172	1.06928	1.02504	1.05632	1.06984	1.07189	1.06115	1.05682	1.08605	1.06483	1.08263	1.07477	1.08094	1.07796
angles
t	2	4	6	8	10	12	14	16	18	20	22	24	26	28	30	32	34	36	38	40	42	44	46
cngc	0	-0.542096	-0.644449	-1.22876	-0.0489775	-0.465552	-0.839773	0.38228	0.181075	1.5983	1.83921	1.75898	1.61105	3.01352	3.19298	3.82441	4.03128	5.5863	6.0935	6.923	8.00717	8.72837	8.82779
col	0	-0.322445	0.473935	-0.306034	0.254257	1.39258	1.48432	1.44665	2.02426	2.53021	2.74373	3.21204	3.72008	3.92874	5.04727	5.45665	5.83593	6.65373	7.31024	7.93791	8.92633	9.46271	10.1094
col	0	-0.01075	0.00198848	0.225866	0.0735698	0.283022	0.379088	-0.0450906	0.203094	0.452054	0.727837	0.897954	0.743533	0.681999	1.00834	0.983164	1.69928	1.75341	1.81574	2.39396	2.92274	3.16134	3.33687
cngc	0	-0.17991	-0.362177	-0.129486	-0.443773	-0.175387	-0.386068	-0.159189	-0.126049	0.0583529	-0.180746	0.105311	0.0231027	-0.0668553	0.361446	0.423188	0.146422	0.49867	0.475116	0.372557	0.671848	1.13651	1.53379
cngc	0	-0.179446	0.51174	0.257092	1.14336	1.49052	1.13946	1.51636	1.51119	0.915759	2.02734	2.10512	2.16705	2.10181	2.16705	2.06212	2.831	2.94923	3.44979	3.7208	4.65308	5.44431	6.15242
cngc	0	0.0485406	-0.117001	-0.300079	-0.494939	-0.412257	-0.413647	-0.594529	-0.513719	-0.582465	-0.548393	-0.4998	-0.412257	-0.174065	-0.429287	-0.318852	-0.236271	-0.311125	-0.0116686	0.0920345	-0.0513424	-0.00460215	0.215503
cngc	0	0.426467	-0.00816279	-0.159817	-0.146234	-0.453517	-0.203711	-0.661174	-0.90794	-0.97029	-0.741027	-1.13951	-1.22589	-1.1849	-0.992675	-1.57276	-1.12579	-1.4763	-1.79272	-1.67781	-1.79348	-1.71853	-1.50561
cngc	0	0.458953	0.551076	0.873308	1.05112	0.979129	1.17606	0.642176	0.904856	0.717442	1.21046	1.52481	1.40899	1.89214	2.00729	1.84031	1.9263	1.55225	2.26869	2.21112	2.23427	2.43135	2.47737
cngc	0	-0.354075	0.311521	0.578981	-0.596512	0.397959	0.762025	0.47042	0.798861	1.00926	0.812743	1.43771	2.61842	2.84298	3.13788	3.26536	3.01224	3.57686	3.86508	4.64205	4.52356	5.96401	6.46027
col	0	-0.48065	-0.593271	-0.727843	-0.0882633	0.294607	0.402396	0.775609	0.750882	0.697311	0.851854	1.68064	1.56344	1.73436	2.17243	1.92744	2.0747	2.7248	3.30906	3.59032	3.83892	4.18492	4.05453
col	0	-0.419427	-0.571939	-0.511775	0.347549	-0.834992	-1.09577	-0.764447	0.125388	0.385138	0.341359	0.342769	1.09075	0.959725	1.67155	1.39561	1.95374	2.60551	2.57005	3.4578	3.79343	3.75635	4.53096
cngc	0	0.231956	-0.00786122	-0.653087	0.373778	0.470338	-0.781757	0.424752	-0.225848	0.666684	0.508752	0.0689887	-0.131488	1.14732	1.30006	1.71753	2.76262	1.85156	2.15588	2.42306	2.12989	2.32921	3.14461
cngc	0	0.314907	0.771654	0.314783	0.402573	0.514495	0.777518	0.435486	0.0678568	1.85622	1.72089	1.29842	1.60143	1.00613	1.98106	1.94474	2.10553	2.19883	2.38769	2.87774	2.69179	2.95281	3.81597
col	0	-0.325863	-0.2681	0.4207	0.153671	0.988829	0.954768	1.74801	1.76719	1.91518	2.15612	3.28814	3.09122	3.70841	3.81494	4.2654	4.51592	5.76227	5.51964	5.94846	7.21298	7.67758	8.40071
col	0	0.0927699	0.596188	0.39596	0.710793	0.762941	1.4121	1.70113	2.16497	2.67672	2.99789	3.29831	4.29798	4.51986	4.66861	5.70631	6.07562	6.82316	6.81145	7.74504	8.30636	8.82514	9.33101
cngc	0	-0.336819	-0.280651	-0.82281	-0.866997	-1.086	-1.1185	-1.26214	-1.19013	-0.924874	-1.4186	-0.772142	-1.02798	-0.552621	-0.604025	-0.800698	-0.360782	-0.285178	-0.0659016	-0.497194	0.115063	0.276507	0.690618
col	0	0.96757	0.199455	0.684537	0.877852	1.25707	1.65652	2.10154	2.1858	1.92443	2.53418	3.16261	2.53235	4.73272	4.82355	5.37821	5.58983	6.54498	6.82633	7.12148	8.08863	9.53195	9.69643
col	0	0.179639	0.107916	1.3925	1.17532	1.13498	1.43556	2.62797	2.62797	3.5708	3.92796	4.49582	5.1035	5.79131	6.35502	7.20271	8.01504	8.08835	8.93702	9.82916	10.261	11.1871	11.7755
col	0	0.157658	-0.355427	-0.595322	-0.27722	0.0144325	0.0334614	0.243691	0.355888	0.72006	0.858849	1.34385	1.34629	1.39018	2.10026	2.58655	3.17036	3.42746	3.49072	4.35272	4.75896	4.94382	5.33117

## Sheet: 5erep1
timescale: each 1-0 seconds image
Root1
left side	0	10	20	30	40	50	60	70	80	90	100	110	120	130	140	150	160	170	180	190	200	210	220	230	240	250	260	270	280	290	300	310	320	330	340	350	360	370	380	390	400	410	420	430	440	450	460	470	480
0	0.918672	0.922207	0.932253	0.932689	0.93232	0.939506	0.924547	0.925895	0.930319	0.92768	0.928625	0.924407	0.92431	0.92004	0.923473	0.92206	0.922706	0.927439	0.928164	0.926293	0.924038	0.92358	0.9211	0.924477	0.923702	0.921166	0.921669	0.93156	0.927149	0.927895	0.921403	0.921455	0.920372	0.928092	0.930273	0.925671	0.925933	0.923872	0.923504	0.929066	0.917959	0.926044	0.923086	0.915873	0.918796	0.924562	0.914468	0.90987	0.923207
20	0.91681	0.923832	0.93077	0.930281	0.929422	0.934747	0.924629	0.927693	0.928658	0.929047	0.930694	0.924238	0.924509	0.919042	0.9238	0.923853	0.924299	0.927791	0.92666	0.926983	0.923273	0.92356	0.923184	0.924247	0.924619	0.924593	0.92427	0.933247	0.927253	0.92927	0.92512	0.923187	0.922941	0.92754	0.929624	0.928821	0.926945	0.92289	0.923292	0.928881	0.919359	0.926481	0.92308	0.915487	0.91865	0.922855	0.915465	0.909378	0.920601
40	0.923195	0.925883	0.932752	0.933239	0.93206	0.939772	0.929491	0.933926	0.93345	0.933017	0.936157	0.928106	0.927363	0.925083	0.92733	0.927152	0.931583	0.930421	0.93201	0.931578	0.928481	0.929287	0.926961	0.927591	0.930569	0.929302	0.929904	0.935373	0.929774	0.93378	0.926756	0.92433	0.92626	0.933944	0.932844	0.933905	0.932453	0.929688	0.929452	0.931729	0.923551	0.928529	0.925964	0.921462	0.923548	0.926155	0.919713	0.915052	0.925309
60	0.929231	0.931808	0.942781	0.938873	0.940511	0.947963	0.93589	0.94046	0.939499	0.938641	0.944315	0.934999	0.934146	0.930207	0.937774	0.93404	0.938385	0.938629	0.935331	0.936682	0.933938	0.936228	0.932792	0.934224	0.937924	0.934014	0.936861	0.9423	0.935254	0.941901	0.932449	0.929593	0.930907	0.940426	0.940494	0.942723	0.937625	0.936193	0.933722	0.939568	0.92943	0.932502	0.931301	0.926642	0.930235	0.932849	0.922779	0.922039	0.932944
80	0.933811	0.938211	0.946271	0.945753	0.945622	0.952471	0.939116	0.945218	0.949351	0.943369	0.949801	0.941848	0.941048	0.939365	0.94184	0.940534	0.947466	0.94563	0.945168	0.944863	0.941376	0.944911	0.940524	0.941272	0.944478	0.94136	0.945101	0.951231	0.944035	0.949631	0.940393	0.940541	0.941024	0.944156	0.948072	0.947971	0.946063	0.943705	0.942284	0.943214	0.934334	0.937856	0.936521	0.935373	0.936759	0.937021	0.930698	0.925688	0.935075
100	0.940964	0.945751	0.959187	0.95209	0.955004	0.959186	0.947786	0.952657	0.952979	0.952466	0.957331	0.950284	0.950099	0.942859	0.950273	0.949415	0.955706	0.954541	0.952629	0.954632	0.94898	0.952969	0.952195	0.948913	0.951639	0.952927	0.954865	0.959417	0.950602	0.957859	0.948665	0.948406	0.945084	0.954685	0.959031	0.955247	0.955654	0.951112	0.949516	0.951988	0.942452	0.947105	0.942771	0.939565	0.942566	0.944364	0.936867	0.9334	0.941398
120	0.952813	0.958971	0.968571	0.959631	0.963341	0.970629	0.956509	0.962873	0.966765	0.965171	0.96764	0.959145	0.958445	0.95324	0.960499	0.959039	0.965363	0.963527	0.96398	0.962746	0.963509	0.962257	0.96352	0.958444	0.960765	0.963484	0.964833	0.9707	0.963066	0.972624	0.959209	0.958572	0.959435	0.967436	0.967641	0.966087	0.964537	0.960842	0.960523	0.96003	0.954169	0.954122	0.951481	0.949679	0.952406	0.952646	0.945417	0.939229	0.949099
140	0.964353	0.968577	0.97647	0.973142	0.978109	0.978635	0.969159	0.971901	0.977777	0.975837	0.980387	0.971889	0.971061	0.965488	0.971914	0.971621	0.978872	0.97963	0.978071	0.976132	0.970858	0.97414	0.97476	0.972155	0.976114	0.975931	0.977832	0.982224	0.977915	0.98554	0.976049	0.970733	0.9742	0.981775	0.979237	0.97779	0.977539	0.971866	0.972381	0.967705	0.96514	0.965796	0.963061	0.958543	0.961141	0.963466	0.954238	0.950148	0.959686
160	0.970831	0.975173	0.98251	0.977419	0.985919	0.985473	0.976708	0.978281	0.983021	0.982245	0.986751	0.977645	0.978607	0.97176	0.982778	0.978084	0.986533	0.987497	0.984627	0.98368	0.978746	0.982424	0.985737	0.982586	0.984455	0.985749	0.985985	0.991471	0.985569	0.995692	0.983487	0.980145	0.986469	0.992506	0.988934	0.98622	0.983045	0.980567	0.978938	0.974322	0.970441	0.969937	0.9695	0.968052	0.968533	0.968834	0.965375	0.960105	0.969633
180	0.97979	0.986022	0.995025	0.986096	0.993767	0.99582	0.984784	0.990258	0.992852	0.988692	0.997057	0.989511	0.988723	0.983691	0.99113	0.989622	0.994342	0.994929	0.995346	0.993747	0.992314	0.994913	0.992741	0.988062	0.992888	0.994987	0.999677	1.00229	0.992902	1.00303	0.989905	0.990534	0.997767	0.998043	0.998206	0.995749	0.99287	0.98864	0.988442	0.983661	0.977959	0.977764	0.974083	0.973914	0.977121	0.975832	0.969523	0.963567	0.974093
200	0.984901	0.991276	1.00119	0.990517	0.998707	1.00253	0.994494	1.00027	1.00216	0.999332	1.0038	1.00269	0.999029	0.991557	0.994143	0.99749	1.00148	1.00233	1.00147	1.00165	1.00267	1.00064	1.00221	0.996005	1.00196	1.00442	1.00919	1.01323	1.00356	1.01286	0.998882	1.00147	1.00186	1.01011	1.00965	1.00714	1.00387	1.0017	0.997031	0.991813	0.984724	0.985482	0.984032	0.981382	0.984254	0.984915	0.980727	0.967725	0.985532
220	0.995674	0.999398	1.00831	1.00066	1.00944	1.01407	1.00227	1.00959	1.01094	1.00911	1.0121	1.00935	1.00783	0.999563	1.00349	1.00666	1.00894	1.00822	1.00814	1.00763	1.00869	1.00883	1.00562	1.00115	1.00751	1.00691	1.01031	1.01805	1.01065	1.01956	1.00657	1.00758	1.00752	1.01701	1.01402	1.00837	1.00707	1.00662	0.997541	0.99487	0.989266	0.990711	0.990627	0.985613	0.986682	0.989151	0.984078	0.970267	0.987862
240	0.999105	1.00509	1.01347	1.00648	1.0171	1.02171	1.01281	1.01656	1.01701	1.01419	1.01778	1.01326	1.01562	1.00097	1.01275	1.01415	1.01333	1.01429	1.01093	1.01093	1.01178	1.01452	1.01343	1.0073	1.01511	1.01526	1.01643	1.02127	1.01509	1.02486	1.01254	1.01344	1.01723	1.02306	1.01975	1.01556	1.01326	1.00847	1.00488	1.00241	0.996511	0.994255	0.994884	0.992008	0.994543	0.992349	0.988339	0.978505	0.993705
260	1.00748	1.0126	1.02112	1.01466	1.02987	1.02958	1.02022	1.02281	1.02234	1.02393	1.02357	1.0159	1.0194	1.01123	1.02057	1.02185	1.02112	1.02047	1.01729	1.01853	1.01759	1.0201	1.01697	1.01221	1.02019	1.01841	1.02116	1.02718	1.01899	1.02858	1.01762	1.01718	1.02079	1.02821	1.02115	1.01657	1.01828	1.01446	1.00592	1.00322	0.997548	0.99763	0.997125	0.995696	0.997862	0.996141	0.99272	0.98016	0.997135
280	1.01602	1.01913	1.02882	1.02102	1.03465	1.03414	1.02913	1.03233	1.03081	1.02687	1.03229	1.02583	1.02445	1.01674	1.02511	1.02725	1.02719	1.02594	1.02214	1.01983	1.02172	1.02784	1.02367	1.01597	1.02728	1.02434	1.02824	1.03346	1.02415	1.03082	1.01975	1.0253	1.02526	1.03273	1.02651	1.0219	1.01944	1.01372	1.00944	1.00903	1.00331	1.00279	1.0023	0.998496	1.00666	1.00193	0.99848	0.987407	1.00224
300	1.0264	1.0277	1.03388	1.03102	1.04067	1.04438	1.03716	1.03794	1.03725	1.03719	1.03579	1.02821	1.03345	1.02178	1.0288	1.03428	1.033	1.03284	1.02363	1.02397	1.02694	1.03291	1.0295	1.02435	1.02949	1.02937	1.03263	1.03924	1.03192	1.04088	1.02761	1.03106	1.03141	1.03629	1.03163	1.02563	1.02194	1.01522	1.01265	1.01474	1.00721	1.00574	1.00732	1.00388	1.01051	1.00679	1.00407	0.992634	1.00413
320	1.03158	1.03126	1.04284	1.03828	1.04939	1.05276	1.04321	1.04454	1.04207	1.04023	1.04618	1.03442	1.03589	1.02611	1.03389	1.03938	1.03923	1.03767	1.0298	1.02889	1.03223	1.03711	1.03017	1.02909	1.0362	1.03428	1.03868	1.03862	1.03194	1.04145	1.03093	1.03461	1.03366	1.04417	1.03473	1.02597	1.02458	1.01454	1.01672	1.01599	1.00944	1.01059	1.01383	1.00723	1.01255	1.01129	1.00786	0.993407	1.01117
340	1.0307	1.03283	1.04284	1.03958	1.05192	1.0525	1.04231	1.04309	1.03923	1.04067	1.04215	1.0366	1.03544	1.02859	1.03372	1.03892	1.03761	1.03603	1.03275	1.0284	1.03323	1.03519	1.03375	1.02924	1.03373	1.03033	1.03545	1.04107	1.03151	1.03979	1.02867	1.0312	1.0315	1.03734	1.03165	1.02196	1.02108	1.01693	1.01437	1.01645	1.00707	1.00918	1.01194	1.00928	1.0144	1.01101	1.01019	0.995472	1.00696
360	1.03033	1.03078	1.04098	1.0419	1.05013	1.05125	1.03854	1.04234	1.03603	1.04009	1.04369	1.03669	1.0386	1.02851	1.03777	1.04087	1.038	1.03624	1.02944	1.02804	1.03159	1.03442	1.03022	1.02514	1.03304	1.02906	1.03261	1.03581	1.02778	1.036	1.02459	1.02804	1.02688	1.03559	1.03175	1.01933	1.01856	1.01502	1.01154	1.01448	1.00515	1.00536	1.00786	1.00745	1.00974	1.01052	1.00589	0.990274	1.00464
380	1.03056	1.03158	1.04145	1.04248	1.04849	1.051	1.03902	1.03933	1.03737	1.03906	1.04376	1.03966	1.0411	1.03003	1.03998	1.0422	1.04008	1.0389	1.02693	1.02669	1.0356	1.03255	1.02914	1.02648	1.03123	1.02919	1.03579	1.03815	1.03105	1.03749	1.02671	1.02742	1.02702	1.03458	1.0282	1.01897	1.01688	1.01503	1.01285	1.01366	1.0063	1.00744	1.00966	1.01061	1.01408	1.01118	1.00745	0.993292	1.00194
400	1.02724	1.03002	1.03785	1.03852	1.04371	1.04372	1.03198	1.03224	1.03022	1.03194	1.03613	1.0351	1.03599	1.02837	1.03799	1.04129	1.03625	1.03665	1.02303	1.02599	1.02984	1.02971	1.02832	1.02491	1.02884	1.02325	1.02641	1.03365	1.02697	1.03176	1.02232	1.02339	1.02123	1.02833	1.0207	1.01649	1.01251	1.01346	1.01278	1.01372	1.00355	1.00404	1.0073	1.00636	1.01167	1.01332	1.00305	0.988826	0.99907
420	1.02263	1.0211	1.02975	1.03059	1.03548	1.03482	1.02281	1.02182	1.02245	1.02442	1.02866	1.0246	1.02859	1.02399	1.03188	1.03262	1.03158	1.02727	1.01932	1.0207	1.02526	1.02163	1.0164	1.01401	1.01853	1.01612	1.0199	1.02935	1.01767	1.02512	1.01097	1.01369	1.01179	1.0199	1.01284	1.00746	1.00949	1.00756	1.00722	1.00485	0.996689	0.999486	0.99938	0.99772	1.00653	1.00399	0.996772	0.984208	0.99466
440	1.00905	1.01155	1.01641	1.01568	1.02203	1.02217	1.01036	1.01044	1.01053	1.01498	1.01972	1.01603	1.01768	1.0118	1.01962	1.02129	1.02081	1.0169	1.00893	1.011	1.01252	1.01308	1.00777	1.00749	1.00849	1.00679	1.01269	1.023	1.01159	1.01624	1.00409	1.00194	1.00374	1.00894	1.00396	1.00136	1.00164	0.997124	0.996103	1.00058	0.988994	0.992481	0.992324	0.988879	0.995316	0.998965	0.990259	0.975551	0.986875
460	0.994237	0.996885	1.00414	1.00558	1.00792	1.01367	0.999161	0.998908	0.999262	1.00292	1.00882	1.00795	1.0059	0.999932	1.00794	1.01069	1.00861	1.00978	1.00364	1.00117	1.00248	1.00426	1.00248	0.998707	1.0001	0.998856	1.0031	1.01209	1.00218	1.00351	0.992215	0.993826	0.993754	1.00239	0.99675	0.995862	0.992376	0.990259	0.989531	0.990424	0.982753	0.987587	0.987027	0.980959	0.990923	0.991407	0.984163	0.968156	0.978909
480	0.980449	0.983466	0.989538	0.989405	0.994516	0.995777	0.986301	0.985284	0.985774	0.989874	0.995781	0.995056	0.99798	0.9913	0.996244	1.00012	0.999476	0.999454	0.996809	0.993383	0.993919	0.993176	0.992514	0.99106	0.993362	0.988058	0.99137	1.00134	0.9959	0.994332	0.986939	0.982754	0.982954	0.991381	0.985955	0.98525	0.983289	0.97742	0.979174	0.980726	0.978449	0.980815	0.97798	0.977201	0.977205	0.981339	0.972656	0.957691	0.968188
500	0.969226	0.970808	0.979508	0.978985	0.97883	0.98646	0.976222	0.977613	0.978133	0.983004	0.987513	0.987646	0.990274	0.985174	0.988838	0.994106	0.996538	0.998434	0.996765	0.991398	0.990997	0.989366	0.991582	0.991888	0.990004	0.986502	0.98745	1.00083	0.987733	0.991512	0.981687	0.981116	0.981945	0.988798	0.984064	0.981524	0.977367	0.971907	0.9729	0.974712	0.971368	0.975701	0.977713	0.971258	0.973011	0.976362	0.967702	0.951322	0.960202
520	0.953636	0.957454	0.965043	0.964822	0.965744	0.974639	0.965374	0.965944	0.96651	0.974341	0.980502	0.979649	0.980045	0.974045	0.98212	0.9845	0.986523	0.99254	0.986799	0.986599	0.986328	0.984659	0.987488	0.982641	0.988032	0.980613	0.983539	0.99106	0.982571	0.986429	0.97577	0.975385	0.975239	0.980775	0.979107	0.975232	0.972713	0.967947	0.967102	0.969415	0.963481	0.971215	0.973475	0.962922	0.967245	0.966071	0.960293	0.944773	0.953468
540	0.940929	0.945118	0.953229	0.952445	0.957256	0.961872	0.95046	0.9548	0.95619	0.962681	0.968307	0.969852	0.970607	0.964469	0.972112	0.977808	0.978154	0.981434	0.981835	0.981537	0.979689	0.978929	0.978155	0.977008	0.97931	0.97621	0.979309	0.982447	0.973251	0.97423	0.968494	0.965488	0.962141	0.972533	0.969727	0.964714	0.962302	0.956356	0.9586	0.959386	0.951668	0.959291	0.96214	0.951844	0.956095	0.958677	0.951697	0.937445	0.945376
560	0.929317	0.934149	0.940882	0.93805	0.940955	0.946507	0.940988	0.941815	0.947938	0.953567	0.961875	0.963701	0.961711	0.957255	0.961734	0.96711	0.971552	0.975064	0.974682	0.976395	0.975572	0.971945	0.970908	0.972053	0.97271	0.967177	0.972422	0.973969	0.963974	0.969378	0.959209	0.956535	0.9542	0.962044	0.960354	0.956523	0.952778	0.950358	0.950928	0.956767	0.948843	0.949677	0.950911	0.944609	0.947955	0.948253	0.942293	0.93073	0.939354
580	0.918292	0.921484	0.927178	0.927934	0.933284	0.937344	0.930078	0.934399	0.937241	0.943017	0.950321	0.954432	0.953108	0.948018	0.952848	0.959449	0.963142	0.9668	0.965043	0.966798	0.963456	0.963117	0.964019	0.96541	0.966088	0.964028	0.963651	0.969063	0.956186	0.960228	0.950876	0.946838	0.945813	0.951915	0.951752	0.944296	0.94344	0.940215	0.944796	0.947829	0.938916	0.939679	0.939747	0.931486	0.933228	0.938729	0.932284	0.919147	0.928575
600	0.906681	0.909422	0.919135	0.918272	0.922336	0.931506	0.920715	0.921573	0.925627	0.931425	0.937337	0.939737	0.940102	0.937328	0.941206	0.946112	0.95565	0.956246	0.956857	0.956463	0.95633	0.95532	0.957045	0.956329	0.957626	0.957701	0.953964	0.958333	0.944687	0.95223	0.944353	0.939716	0.936236	0.94521	0.943788	0.9364	0.935033	0.933596	0.936037	0.941584	0.934401	0.933827	0.931096	0.922904	0.926001	0.929768	0.923433	0.910282	0.92276
620	0.900503	0.902621	0.911387	0.909796	0.913016	0.919226	0.912916	0.91662	0.916665	0.922857	0.925402	0.929471	0.929827	0.927183	0.935522	0.938275	0.944307	0.947727	0.948236	0.948969	0.950008	0.947172	0.948146	0.948465	0.951377	0.946808	0.947706	0.953269	0.937837	0.946925	0.938225	0.937673	0.932395	0.939255	0.934525	0.931729	0.930611	0.930648	0.932449	0.934838	0.927023	0.927257	0.924531	0.919752	0.921054	0.920904	0.917156	0.905795	0.91537
640	0.894506	0.895962	0.903212	0.901664	0.907193	0.912244	0.903162	0.904949	0.909248	0.912353	0.917363	0.918651	0.918718	0.915801	0.925784	0.92646	0.934879	0.937141	0.937769	0.944452	0.942384	0.939362	0.937853	0.940045	0.942544	0.939124	0.939355	0.946529	0.932952	0.941289	0.931755	0.928476	0.928161	0.93598	0.931315	0.925834	0.926464	0.92288	0.925337	0.927939	0.920394	0.919569	0.918255	0.912811	0.912545	0.914006	0.909195	0.90572	0.911469
660	0.888807	0.894096	0.89938	0.896078	0.898211	0.904744	0.895997	0.898069	0.900713	0.90623	0.909741	0.909912	0.911877	0.910389	0.920297	0.919686	0.924517	0.930263	0.932593	0.936462	0.9354	0.934004	0.933285	0.929459	0.934841	0.929086	0.933972	0.937527	0.931446	0.938618	0.927942	0.923742	0.92546	0.930122	0.92505	0.922402	0.918908	0.917537	0.919189	0.919812	0.913894	0.917194	0.912928	0.907046	0.907358	0.909339	0.90476	0.901522	0.907783
680	0.881779	0.885508	0.894728	0.88912	0.89389	0.897874	0.890354	0.894609	0.893945	0.899501	0.899846	0.902463	0.903516	0.90196	0.913115	0.912116	0.917646	0.921904	0.92406	0.928456	0.927309	0.926856	0.923536	0.925328	0.930863	0.924809	0.927415	0.932286	0.924416	0.931302	0.921668	0.921855	0.917786	0.924631	0.924402	0.917796	0.917171	0.912547	0.916369	0.916022	0.909048	0.90849	0.906134	0.902765	0.901665	0.904625	0.90295	0.89587	0.905553
700	0.876302	0.879766	0.886147	0.881084	0.884581	0.89028	0.882418	0.885779	0.887815	0.888956	0.894019	0.891826	0.894803	0.895989	0.903663	0.903342	0.908011	0.91187	0.913519	0.91688	0.918917	0.919436	0.915817	0.917072	0.919391	0.918626	0.921356	0.926304	0.917067	0.926406	0.914824	0.917532	0.913918	0.921408	0.919331	0.914409	0.907241	0.910913	0.909242	0.911212	0.904165	0.905334	0.902863	0.900923	0.898863	0.901909	0.897446	0.889857	0.90076
720	0.869297	0.873132	0.877314	0.877243	0.879226	0.885643	0.873559	0.878808	0.881164	0.882562	0.884463	0.888398	0.88805	0.884992	0.895796	0.896506	0.897847	0.903917	0.905532	0.907644	0.90855	0.910975	0.908356	0.910924	0.91223	0.911179	0.916397	0.919519	0.911331	0.921902	0.90783	0.905478	0.907664	0.914099	0.911934	0.904247	0.905909	0.904595	0.904958	0.902299	0.896915	0.898436	0.897657	0.895636	0.894622	0.895754	0.893423	0.885567	0.89724
740	0.863354	0.867198	0.87391	0.869895	0.875081	0.880145	0.868923	0.874515	0.873351	0.873154	0.877788	0.877652	0.881683	0.878653	0.889704	0.888525	0.893672	0.894857	0.897847	0.899093	0.901156	0.904488	0.902116	0.901212	0.90461	0.905683	0.906432	0.913049	0.904814	0.911456	0.904118	0.900376	0.902458	0.908606	0.906088	0.90023	0.898629	0.898224	0.896873	0.898136	0.894832	0.894388	0.894455	0.889529	0.89047	0.890641	0.890362	0.879803	0.891891
760	0.860585	0.863994	0.870259	0.867597	0.873016	0.874496	0.865173	0.870396	0.870409	0.8697	0.875809	0.875815	0.876721	0.872068	0.881557	0.883648	0.886583	0.888762	0.889658	0.892934	0.893461	0.899611	0.89777	0.897267	0.900373	0.900804	0.90432	0.910945	0.902196	0.910733	0.895895	0.898191	0.902176	0.905477	0.903191	0.897508	0.89699	0.89505	0.8955	0.894966	0.88979	0.892566	0.890365	0.886316	0.890391	0.890499	0.887923	0.877755	0.889983
780	0.85718	0.858161	0.86839	0.862194	0.866684	0.871362	0.862265	0.868349	0.866353	0.864967	0.872676	0.869295	0.872629	0.867723	0.87535	0.878061	0.879894	0.883295	0.882418	0.88513	0.885746	0.890517	0.891208	0.890447	0.893502	0.89535	0.896834	0.903233	0.895986	0.903824	0.892675	0.892345	0.898108	0.903585	0.900299	0.894898	0.893443	0.889306	0.889924	0.892646	0.888934	0.890068	0.888212	0.880848	0.884578	0.887542	0.884382	0.875955	0.888999
800	0.852135	0.856365	0.86411	0.858297	0.864838	0.864277	0.85795	0.860753	0.861037	0.861938	0.865269	0.863532	0.867064	0.860942	0.871462	0.872166	0.871554	0.875567	0.875579	0.879089	0.877388	0.881692	0.882425	0.883111	0.8875	0.889538	0.892096	0.896466	0.889306	0.896908	0.887783	0.886802	0.893536	0.898166	0.896957	0.890604	0.890563	0.889688	0.887428	0.891339	0.884354	0.886977	0.883601	0.882005	0.883457	0.883265	0.882144	0.873198	0.887154
820	0.847851	0.850546	0.859081	0.853446	0.860415	0.861179	0.85308	0.856438	0.856234	0.855787	0.859803	0.855941	0.85898	0.854136	0.863542	0.864642	0.86605	0.868974	0.86732	0.868498	0.86845	0.874232	0.875976	0.873054	0.880977	0.882602	0.885917	0.889774	0.881359	0.8901	0.877973	0.8804	0.88411	0.894487	0.891501	0.886625	0.886638	0.884215	0.883345	0.885534	0.87963	0.885539	0.883474	0.878734	0.881085	0.880065	0.880804	0.871289	0.885134
840	0.842636	0.844801	0.855532	0.848081	0.854625	0.854747	0.849497	0.850622	0.852477	0.851471	0.854778	0.850112	0.853966	0.847192	0.855943	0.857537	0.85727	0.861813	0.859052	0.862364	0.861874	0.866765	0.86953	0.867583	0.872961	0.874415	0.877051	0.881151	0.873743	0.885015	0.874287	0.875492	0.879186	0.887523	0.884999	0.883059	0.879508	0.879283	0.881374	0.880274	0.877347	0.878375	0.879389	0.874637	0.877401	0.87825	0.877938	0.870237	0.883708
[truncated: 551 more columns]

## Sheet: 5erep2
Root1	left side
		0	10	20	30	40	50	60	70	80	90	100	110	120	130	140	150	160	170	180	190	200	210	220	230	240	250	260	270	280	290	300	310	320	330	340	350	360	370	380	390	400	410	420	430	440	450	460	470
	0	0.924412	0.931429	0.937037	0.936897	0.935171	0.937597	0.930914	0.936109	0.921271	0.929273	0.935075	0.931616	0.924618	0.935727	0.933777	0.92016	0.9279	0.925708	0.918209	0.92662	0.926141	0.920447	0.920396	0.928908	0.921228	0.926777	0.913959	0.917498	0.920206	0.914643	0.919677	0.925099	0.920596	0.924776	0.923904	0.910641	0.915459	0.90719	0.909887	0.912964	0.909703	0.902498	0.916104	0.914432	0.907385	0.909461	0.914998	0.907474
	20	0.928257	0.931494	0.937149	0.939397	0.937591	0.941382	0.933736	0.939586	0.923382	0.934273	0.936668	0.934057	0.927074	0.938079	0.934448	0.924467	0.928261	0.927599	0.921604	0.925938	0.928548	0.924675	0.924433	0.928525	0.924035	0.929203	0.915211	0.923318	0.921926	0.91385	0.920486	0.929384	0.921782	0.927893	0.925113	0.912415	0.917842	0.910455	0.909591	0.912681	0.9105	0.904818	0.919051	0.914352	0.908785	0.909198	0.912517	0.911768
	40	0.931404	0.934902	0.944566	0.940516	0.941702	0.942906	0.932495	0.941766	0.928072	0.936806	0.938581	0.93576	0.929094	0.940412	0.938408	0.923087	0.932256	0.932797	0.924427	0.930915	0.931808	0.924718	0.925826	0.929821	0.923059	0.929616	0.916577	0.922318	0.924072	0.916256	0.922323	0.930708	0.925791	0.927328	0.927082	0.914046	0.920491	0.911703	0.91137	0.914761	0.910688	0.905534	0.921255	0.916693	0.9052	0.91104	0.912919	0.911562
	60	0.939431	0.94448	0.946333	0.947624	0.945175	0.94889	0.940331	0.949535	0.934001	0.941269	0.944614	0.940835	0.936438	0.944647	0.942185	0.927774	0.935692	0.934701	0.929105	0.934609	0.935128	0.930654	0.930173	0.934735	0.924871	0.933728	0.922015	0.925362	0.927315	0.919548	0.923666	0.931451	0.927887	0.930758	0.929358	0.916211	0.921469	0.914656	0.916636	0.917911	0.915961	0.908474	0.921857	0.920137	0.911432	0.915451	0.911039	0.914253
	80	0.947331	0.954317	0.956899	0.95423	0.954393	0.953868	0.948893	0.956331	0.942555	0.950147	0.953245	0.948973	0.944523	0.951685	0.949316	0.936603	0.944507	0.94352	0.934207	0.943491	0.944469	0.936777	0.937241	0.938557	0.934343	0.939589	0.925223	0.929247	0.931211	0.929059	0.932344	0.938218	0.931703	0.938447	0.936923	0.92144	0.929451	0.922385	0.92084	0.92615	0.922507	0.916088	0.930041	0.926074	0.916376	0.919514	0.917196	0.91823
	100	0.957707	0.964313	0.968282	0.965226	0.963253	0.967758	0.959361	0.967421	0.954288	0.963247	0.963902	0.961482	0.955542	0.959465	0.960334	0.945873	0.954861	0.952766	0.946528	0.953545	0.954362	0.947257	0.944911	0.94862	0.941064	0.947506	0.934036	0.940619	0.941703	0.93883	0.940617	0.947413	0.942202	0.946525	0.94648	0.931842	0.939152	0.931606	0.931919	0.936037	0.931444	0.924154	0.937147	0.934444	0.92622	0.925139	0.924149	0.924908
	120	0.969147	0.97322	0.973456	0.971838	0.97022	0.974668	0.967793	0.976504	0.964965	0.968492	0.97122	0.96998	0.960348	0.969458	0.968095	0.951059	0.958373	0.962924	0.955634	0.959298	0.961817	0.956483	0.954638	0.955251	0.948953	0.952554	0.943132	0.949533	0.950712	0.946089	0.946486	0.954794	0.948614	0.953842	0.95606	0.937576	0.951057	0.938093	0.938831	0.943165	0.940591	0.934222	0.944594	0.939809	0.932947	0.93288	0.931418	0.930646
	140	0.979543	0.980882	0.980336	0.97738	0.975953	0.980164	0.976138	0.981948	0.964008	0.976737	0.974413	0.971581	0.968441	0.973883	0.971598	0.959568	0.968207	0.971703	0.965103	0.967531	0.969247	0.96054	0.961482	0.963985	0.952854	0.961563	0.949537	0.95296	0.956522	0.950892	0.952956	0.960196	0.953682	0.960657	0.963507	0.943869	0.955326	0.941645	0.945357	0.950054	0.944595	0.94011	0.952435	0.947968	0.938305	0.936427	0.94098	0.937998
	160	0.985936	0.985572	0.989162	0.983384	0.980448	0.987894	0.975592	0.985219	0.968793	0.983176	0.98245	0.979542	0.97376	0.975751	0.977748	0.967005	0.975349	0.973925	0.96789	0.973728	0.974387	0.969249	0.962595	0.968832	0.956208	0.968026	0.952938	0.96079	0.961963	0.95839	0.956499	0.964512	0.958807	0.9673	0.969708	0.945198	0.955631	0.949742	0.949492	0.954079	0.948754	0.94422	0.957566	0.953799	0.94394	0.938291	0.943997	0.941277
	180	0.989359	0.991184	0.993975	0.989996	0.987704	0.990324	0.980921	0.990131	0.972962	0.986392	0.988304	0.985998	0.976613	0.979968	0.982867	0.967079	0.980552	0.976463	0.971248	0.977618	0.975983	0.971289	0.969611	0.972735	0.961354	0.972173	0.960017	0.967423	0.966487	0.963111	0.9625	0.969521	0.96536	0.969582	0.969641	0.948644	0.955029	0.953552	0.954303	0.952577	0.954454	0.94526	0.960383	0.953911	0.943918	0.943376	0.949188	0.947337
	200	0.990812	0.992495	0.994344	0.993257	0.988789	0.992546	0.985466	0.992405	0.979394	0.990973	0.99092	0.985702	0.978592	0.985284	0.985816	0.973107	0.98329	0.981621	0.973483	0.979043	0.978858	0.973565	0.971147	0.974508	0.963562	0.976184	0.96146	0.966988	0.968323	0.962372	0.966235	0.971926	0.966615	0.972312	0.972	0.951461	0.95866	0.95467	0.956043	0.954615	0.954055	0.946387	0.962359	0.959779	0.949718	0.947957	0.95238	0.949462
	220	0.995678	0.999416	1.00047	1.00108	0.995534	0.998424	0.988958	0.998786	0.982248	0.989182	0.990607	0.99225	0.982855	0.991445	0.987242	0.973463	0.98726	0.985696	0.976663	0.978782	0.979795	0.97183	0.973107	0.97643	0.966331	0.977734	0.965056	0.970595	0.970764	0.964906	0.965871	0.975079	0.967772	0.972453	0.972327	0.953386	0.961863	0.954764	0.95564	0.957129	0.957432	0.948167	0.964332	0.962241	0.94917	0.949827	0.954834	0.952882
	240	1.00479	1.00576	1.00789	1.00439	1.00101	1.00412	0.994993	1.00212	0.989505	0.995336	0.997655	0.997574	0.988362	0.994447	0.99227	0.980399	0.992241	0.991338	0.982532	0.981451	0.983914	0.979361	0.976123	0.984365	0.972628	0.982888	0.970295	0.976132	0.978637	0.968925	0.971498	0.98294	0.972814	0.977913	0.975493	0.959808	0.96348	0.957958	0.957633	0.960837	0.960046	0.953703	0.968937	0.965468	0.956174	0.958127	0.96137	0.958988
	260	1.0145	1.01592	1.01535	1.01489	1.01039	1.01238	1.0048	1.00967	0.994584	1.00432	1.00459	1.00329	0.993106	1.00207	1.00044	0.983879	0.997939	0.997055	0.982848	0.989191	0.984888	0.981755	0.980919	0.990009	0.979399	0.988072	0.975122	0.981859	0.981489	0.974588	0.976626	0.98314	0.975519	0.976023	0.976724	0.960743	0.964256	0.959702	0.958837	0.961627	0.963916	0.954428	0.97107	0.965055	0.958654	0.956789	0.964302	0.959845
	280	1.02173	1.02384	1.02164	1.02281	1.01891	1.01571	1.01395	1.01608	1.00071	1.01145	1.00959	1.01089	1.00054	1.00605	1.00564	0.988725	1.00201	1.00108	0.988855	0.992353	0.991637	0.989014	0.988008	0.996588	0.98688	0.994973	0.983062	0.989585	0.98767	0.980669	0.976896	0.988475	0.980688	0.983379	0.981732	0.96742	0.970625	0.964798	0.964184	0.965341	0.965472	0.956937	0.972018	0.970785	0.964693	0.963964	0.971566	0.966563
	300	1.02624	1.0312	1.02754	1.0274	1.02447	1.02604	1.01898	1.02065	1.00839	1.02046	1.01843	1.01816	1.00502	1.01228	1.00954	0.995999	1.00831	1.00718	0.993987	0.998182	0.996625	0.994155	0.993088	1.00304	0.993507	0.996115	0.989235	0.993375	0.991473	0.986499	0.982452	0.9905	0.983075	0.987127	0.984828	0.968576	0.971901	0.966248	0.968004	0.967327	0.967868	0.959739	0.976392	0.971659	0.968041	0.970639	0.973975	0.968911
	320	1.03549	1.03541	1.03328	1.03148	1.03267	1.03149	1.02281	1.02916	1.01693	1.02552	1.02418	1.02348	1.01058	1.01981	1.01333	0.998626	1.0098	1.00783	0.997531	1.00301	1.0015	0.996739	0.995757	1.00461	0.991827	0.998759	0.988849	0.993243	0.995119	0.984108	0.981794	0.992152	0.983416	0.986003	0.985359	0.971592	0.97245	0.967117	0.967609	0.966961	0.966512	0.962001	0.975306	0.972089	0.965718	0.967637	0.974238	0.969428
	340	1.04275	1.04237	1.04154	1.041	1.03515	1.03744	1.03209	1.03751	1.026	1.0343	1.03413	1.03388	1.01956	1.0245	1.0176	1.00154	1.01618	1.01245	0.999263	1.00833	1.00714	1.00596	1.00199	1.0085	0.993891	1.00392	0.989017	0.99629	0.994477	0.985061	0.982986	0.990968	0.984061	0.987934	0.986437	0.973103	0.975216	0.968089	0.969311	0.96613	0.966663	0.962511	0.973475	0.972419	0.971953	0.96988	0.973771	0.971964
	360	1.04525	1.04885	1.04455	1.04342	1.0363	1.0387	1.03641	1.03899	1.02701	1.03389	1.03168	1.03337	1.01782	1.02182	1.0179	1.00231	1.01457	1.01315	1.00159	1.01226	1.00955	1.00803	1.00382	1.00794	0.993854	1.00196	0.993114	0.997955	0.996126	0.985824	0.981592	0.988902	0.98373	0.985528	0.984722	0.971057	0.975269	0.9694	0.967222	0.964888	0.96116	0.959159	0.973527	0.971412	0.969477	0.970759	0.97324	0.969607
	380	1.04482	1.04298	1.03854	1.03633	1.02775	1.03206	1.02821	1.02788	1.01961	1.02826	1.02585	1.02415	1.00909	1.0139	1.00807	0.995169	1.00487	1.00302	0.995369	1.00373	1.00409	1.00202	0.998026	1.00173	0.985969	0.993116	0.983581	0.988451	0.988621	0.975765	0.973194	0.980571	0.9747	0.979751	0.97525	0.9655	0.969893	0.962886	0.958822	0.957424	0.955306	0.948755	0.963809	0.96594	0.963838	0.961248	0.9636	0.959878
	400	1.03906	1.03717	1.03478	1.02971	1.02716	1.02314	1.02177	1.02401	1.01146	1.01975	1.01919	1.01902	1.00272	1.00833	1.00324	0.990504	1.00005	0.99908	0.987431	0.997125	0.994617	0.992111	0.991877	0.995483	0.98338	0.986896	0.978846	0.986621	0.981966	0.973934	0.969806	0.975966	0.969242	0.971771	0.969533	0.960355	0.965427	0.956766	0.955603	0.951509	0.949983	0.942485	0.958775	0.956105	0.956256	0.954213	0.959151	0.950178
	420	1.02938	1.02414	1.02384	1.02619	1.01936	1.02058	1.01396	1.01374	1.00285	1.01086	1.01112	1.0136	0.996133	1.00257	0.994026	0.984415	0.989806	0.989523	0.980191	0.987388	0.984662	0.98338	0.980733	0.987765	0.976363	0.979119	0.971243	0.975714	0.974912	0.963063	0.963303	0.968231	0.960748	0.965775	0.961724	0.951031	0.954428	0.94932	0.947752	0.942276	0.940547	0.935604	0.949377	0.950736	0.945073	0.94624	0.949199	0.941884
	440	1.01273	1.01323	1.00993	1.01509	1.00938	1.00784	1.0015	1.00161	0.987072	0.998723	1.00065	1.003	0.989561	0.996184	0.988134	0.97793	0.987462	0.983702	0.970432	0.973903	0.973752	0.97435	0.973118	0.97926	0.967924	0.976175	0.965597	0.968942	0.968584	0.957911	0.955536	0.960643	0.955	0.959929	0.955491	0.944753	0.94621	0.943076	0.943568	0.938395	0.938062	0.929612	0.943711	0.941005	0.938914	0.939192	0.942853	0.936754
	460	0.997302	0.99167	0.9886	0.995779	0.993306	0.989327	0.984964	0.98358	0.969129	0.97754	0.984529	0.986	0.974502	0.979706	0.97431	0.963766	0.971036	0.972593	0.955825	0.957648	0.959768	0.957868	0.956735	0.96462	0.956009	0.962445	0.950672	0.955174	0.951845	0.944959	0.942676	0.948137	0.941031	0.947102	0.942452	0.9316	0.934425	0.93111	0.929366	0.926545	0.923667	0.917576	0.931458	0.931082	0.925757	0.926892	0.934374	0.927294
	480	0.980005	0.978261	0.977429	0.980366	0.978492	0.978378	0.972701	0.971729	0.960535	0.96947	0.973663	0.976567	0.96418	0.969631	0.961204	0.953872	0.965691	0.961443	0.948668	0.950859	0.951467	0.949026	0.949153	0.955644	0.949378	0.957481	0.943249	0.947626	0.945703	0.937882	0.936024	0.941001	0.935163	0.938559	0.937075	0.920392	0.924399	0.918937	0.921966	0.918142	0.916496	0.91118	0.920503	0.920006	0.914875	0.916357	0.920235	0.914777
	500	0.960472	0.959964	0.957254	0.962067	0.961279	0.956843	0.954995	0.956579	0.943724	0.952887	0.955055	0.95979	0.950148	0.953564	0.949209	0.939106	0.951893	0.947676	0.935875	0.936109	0.937064	0.936833	0.935049	0.943954	0.937231	0.943593	0.933385	0.934684	0.934881	0.927255	0.928733	0.93326	0.925241	0.928007	0.924046	0.91265	0.915416	0.912031	0.914702	0.911592	0.909122	0.904995	0.914427	0.912749	0.905547	0.90911	0.913382	0.9075
	520	0.944419	0.945384	0.942471	0.946341	0.944475	0.944717	0.940863	0.942103	0.930194	0.938066	0.941992	0.944011	0.937776	0.941546	0.934509	0.926796	0.939902	0.935864	0.923596	0.926722	0.92518	0.924466	0.922342	0.932419	0.926102	0.931337	0.921858	0.923057	0.926514	0.914469	0.917489	0.922459	0.916126	0.918463	0.914403	0.901848	0.907621	0.903168	0.903579	0.899302	0.899653	0.893537	0.905168	0.90228	0.893886	0.897018	0.897991	0.894421
	540	0.926378	0.928007	0.927229	0.928326	0.929677	0.928691	0.924925	0.927374	0.915389	0.923999	0.929139	0.931205	0.923743	0.928319	0.922927	0.913503	0.924562	0.925299	0.910836	0.915633	0.915869	0.912083	0.910527	0.921209	0.917178	0.921579	0.911602	0.91313	0.915831	0.907505	0.909842	0.914283	0.904713	0.909318	0.907514	0.895463	0.900537	0.894475	0.896556	0.892641	0.893543	0.885468	0.896645	0.895112	0.88554	0.886447	0.889174	0.882853
	560	0.91448	0.915726	0.918409	0.922704	0.920155	0.921772	0.91456	0.917885	0.90893	0.915797	0.917365	0.921001	0.913727	0.921015	0.914991	0.906893	0.914954	0.913153	0.9034	0.907284	0.909096	0.905446	0.903252	0.91243	0.907283	0.914506	0.905542	0.904903	0.906727	0.897655	0.899158	0.904643	0.894439	0.901151	0.900232	0.885248	0.892254	0.885369	0.884958	0.883895	0.884307	0.876846	0.88673	0.883993	0.874808	0.875549	0.878052	0.874491
	580	0.904987	0.907194	0.909105	0.912478	0.910939	0.912368	0.90641	0.910345	0.902489	0.910377	0.911527	0.914878	0.911767	0.916646	0.911601	0.898748	0.910243	0.90942	0.901272	0.906412	0.907064	0.905283	0.900825	0.909983	0.907893	0.911892	0.902237	0.903911	0.905641	0.89655	0.898031	0.901738	0.895852	0.901888	0.899133	0.885644	0.894322	0.884758	0.885157	0.881519	0.882219	0.873734	0.885352	0.880535	0.87447	0.875628	0.876086	0.872133
	600	0.898803	0.89771	0.9019	0.902405	0.900352	0.903076	0.898777	0.903948	0.892446	0.900755	0.907174	0.910029	0.900379	0.906966	0.90404	0.893285	0.903859	0.903092	0.896949	0.901014	0.900439	0.901127	0.898841	0.906828	0.901	0.908004	0.89941	0.901278	0.901795	0.893469	0.894803	0.89808	0.896156	0.900117	0.898295	0.886145	0.89183	0.886322	0.883103	0.878199	0.879655	0.872633	0.880342	0.875311	0.871554	0.872506	0.875499	0.871036
	620	0.888878	0.89225	0.892517	0.895185	0.889979	0.894381	0.891576	0.89564	0.886133	0.895302	0.89806	0.900126	0.894234	0.901715	0.897146	0.886743	0.896197	0.895855	0.890213	0.896174	0.897945	0.897488	0.893499	0.900884	0.894815	0.902661	0.895423	0.895941	0.896501	0.887943	0.892027	0.89332	0.89098	0.89601	0.897111	0.882349	0.886602	0.879842	0.877651	0.875991	0.873646	0.867589	0.877089	0.873506	0.867431	0.867085	0.869989	0.867036
	640	0.877912	0.882165	0.884978	0.888018	0.885199	0.888037	0.883401	0.890504	0.880643	0.889937	0.889155	0.888455	0.887052	0.898522	0.892511	0.880488	0.890881	0.894792	0.887773	0.892011	0.893623	0.891413	0.889976	0.899498	0.892162	0.899836	0.890596	0.89165	0.894053	0.887199	0.890009	0.894895	0.887649	0.89556	0.892386	0.879224	0.883833	0.876303	0.874903	0.875704	0.871407	0.864037	0.875165	0.871631	0.865039	0.863952	0.868378	0.86598
	660	0.869199	0.87388	0.876594	0.878042	0.875191	0.8771	0.872759	0.880047	0.869192	0.876236	0.881614	0.880104	0.877997	0.887857	0.882736	0.872353	0.884099	0.881947	0.879402	0.883192	0.884441	0.881569	0.883286	0.891912	0.885093	0.893041	0.885117	0.888342	0.889626	0.882745	0.883801	0.891038	0.884057	0.888141	0.889145	0.874083	0.876961	0.873327	0.869372	0.870668	0.868025	0.860597	0.872305	0.869547	0.864794	0.861752	0.86515	0.862921
	680	0.860528	0.865826	0.865001	0.868212	0.864463	0.867168	0.862775	0.86954	0.858833	0.865704	0.869573	0.869481	0.866245	0.876708	0.8757	0.864623	0.875143	0.874977	0.869095	0.875125	0.874836	0.874672	0.874904	0.883988	0.879364	0.886576	0.877419	0.883688	0.885118	0.87673	0.880531	0.885925	0.880461	0.883625	0.883826	0.868103	0.873081	0.865621	0.863042	0.866547	0.861094	0.856654	0.86524	0.86474	0.859593	0.857786	0.861103	0.857246
	700	0.853872	0.857607	0.859903	0.862161	0.857776	0.860284	0.853539	0.85845	0.850288	0.857764	0.859041	0.859247	0.858235	0.864803	0.862867	0.855134	0.865377	0.866257	0.859512	0.864782	0.866387	0.866301	0.867307	0.873653	0.87017	0.876466	0.871151	0.875391	0.878922	0.871268	0.872458	0.87826	0.871358	0.877305	0.874789	0.862317	0.863879	0.8597	0.858718	0.861103	0.855216	0.851628	0.861379	0.859164	0.853018	0.85438	0.854442	0.853419
	720	0.852475	0.854581	0.856515	0.859332	0.854199	0.856135	0.850828	0.856861	0.845819	0.854203	0.853936	0.855654	0.852252	0.860225	0.858682	0.852748	0.864721	0.862543	0.853545	0.861482	0.863707	0.863634	0.863668	0.871045	0.868695	0.873132	0.866886	0.870585	0.875653	0.868251	0.871879	0.875397	0.869125	0.873751	0.873998	0.860846	0.861948	0.856177	0.854829	0.85539	0.854833	0.849214	0.857591	0.856271	0.851444	0.847133	0.85453	0.852382
	740	0.846726	0.848791	0.851265	0.850275	0.847465	0.852003	0.84776	0.849531	0.840653	0.847062	0.84715	0.847615	0.845226	0.854237	0.853663	0.845407	0.85494	0.854281	0.846765	0.854679	0.859025	0.858652	0.85769	0.868425	0.860932	0.869977	0.861169	0.866416	0.868324	0.863885	0.868834	0.872746	0.866312	0.873181	0.870662	0.856737	0.859857	0.855922	0.853469	0.856224	0.853971	0.84891	0.859598	0.85834	0.85145	0.848201	0.854784	0.853918
	760	0.845329	0.845516	0.848055	0.847646	0.844995	0.847428	0.840867	0.848467	0.836389	0.842733	0.843269	0.843397	0.837908	0.850697	0.848935	0.838886	0.849992	0.850459	0.843231	0.850005	0.854762	0.853026	0.854364	0.86094	0.856394	0.864581	0.854477	0.861566	0.863717	0.859215	0.861902	0.867117	0.862643	0.865516	0.8637	0.851526	0.855381	0.849943	0.848801	0.851422	0.850363	0.845999	0.854121	0.850883	0.844433	0.845438	0.849884	0.848593
	780	0.842832	0.84392	0.845844	0.846603	0.8428	0.847566	0.841457	0.844729	0.835369	0.84164	0.843474	0.843539	0.838683	0.848944	0.850169	0.838195	0.850126	0.848008	0.840106	0.849732	0.854691	0.851781	0.853161	0.862501	0.852678	0.85959	0.852684	0.859353	0.863605	0.859694	0.861073	0.869534	0.860943	0.863977	0.864246	0.851815	0.856892	0.852278	0.850298	0.853228	0.851451	0.844974	0.855534	0.854675	0.847445	0.845147	0.851318	0.848977
	800	0.838359	0.838579	0.838024	0.842661	0.838392	0.839888	0.835715	0.838789	0.829699	0.83413	0.834955	0.835181	0.833718	0.841579	0.840676	0.829402	0.841719	0.839721	0.834801	0.842193	0.848126	0.845948	0.844848	0.855661	0.846062	0.852221	0.846735	0.852444	0.856016	0.852977	0.856595	0.862758	0.855987	0.859715	0.859856	0.846614	0.852524	0.848533	0.848775	0.850817	0.847918	0.841131	0.855885	0.851978	0.844796	0.842437	0.84926	0.847899
right side
		0	10	20	30	40	50	60	70	80	90	100	110	120	130	140	150	160	170	180	190	200	210	220	230	240	250	260	270	280	290	300	310	320	330	340	350	360	370	380	390	400	410	420	430	440	450	460	470
	0	0.932318	0.9379	0.943686	0.940679	0.942047	0.945009	0.939917	0.941094	0.926801	0.936754	0.940446	0.93594	0.932057	0.94059	0.939489	0.928475	0.932485	0.928613	0.920951	0.928885	0.929237	0.924733	0.922769	0.929443	0.92259	0.935046	0.915708	0.919831	0.922161	0.917802	0.925624	0.932096	0.924775	0.929829	0.928561	0.913404	0.919882	0.912247	0.912276	0.914352	0.916655	0.904484	0.922642	0.919402	0.913336	0.913581	0.917014	0.915514
	20	0.942633	0.94347	0.950649	0.951865	0.948607	0.952959	0.944697	0.952393	0.936312	0.947388	0.950159	0.943796	0.941264	0.948821	0.947241	0.935865	0.937981	0.934941	0.927448	0.937115	0.936806	0.930151	0.9292	0.933214	0.92794	0.936029	0.921081	0.924693	0.926855	0.922367	0.927997	0.934881	0.926028	0.931573	0.934983	0.914874	0.922589	0.913118	0.914287	0.917183	0.915547	0.908988	0.922952	0.921627	0.91396	0.914561	0.915258	0.917537
	40	0.951865	0.955706	0.96089	0.959233	0.958353	0.963408	0.952393	0.960535	0.944992	0.957253	0.957326	0.954597	0.948772	0.956684	0.956577	0.942583	0.948727	0.945825	0.93734	0.945219	0.944831	0.938578	0.937156	0.941131	0.937306	0.945878	0.930604	0.934042	0.937489	0.933115	0.936009	0.942544	0.937961	0.940903	0.941548	0.919013	0.932644	0.922118	0.922169	0.927537	0.921175	0.917597	0.930804	0.927594	0.921703	0.921081	0.925975	0.923767
	60	0.964195	0.963054	0.968729	0.9679	0.965883	0.972454	0.962377	0.969496	0.956821	0.963938	0.968253	0.963095	0.962251	0.964374	0.965499	0.952217	0.955779	0.952135	0.94449	0.951341	0.950666	0.945688	0.945641	0.950886	0.941823	0.954118	0.936272	0.943455	0.943561	0.940056	0.944764	0.949802	0.94514	0.94924	0.947614	0.929613	0.93667	0.928429	0.931146	0.934086	0.929799	0.923031	0.938936	0.934838	0.92525	0.929413	0.931198	0.932676
	80	0.967981	0.971783	0.976831	0.973005	0.974659	0.977792	0.968841	0.977937	0.96117	0.969067	0.973662	0.97088	0.963788	0.971163	0.970409	0.955267	0.961602	0.957949	0.950672	0.955273	0.955633	0.950206	0.947712	0.954301	0.948965	0.957574	0.940891	0.945335	0.949642	0.94576	0.947197	0.95502	0.949902	0.95018	0.954316	0.932806	0.939887	0.93294	0.935935	0.939011	0.930667	0.929077	0.942279	0.939053	0.933225	0.930662	0.937823	0.938727
	100	0.976514	0.982307	0.986406	0.981244	0.981988	0.990545	0.979902	0.986601	0.973702	0.975406	0.98083	0.978289	0.97171	0.982372	0.977676	0.960404	0.964867	0.96508	0.957703	0.96347	0.962222	0.955885	0.954606	0.961818	0.951289	0.959642	0.947413	0.952429	0.954001	0.949529	0.953021	0.959834	0.953913	0.956041	0.959707	0.936477	0.945705	0.9372	0.940723	0.944905	0.935805	0.934986	0.946193	0.943551	0.935779	0.938263	0.941912	0.944357
	120	0.990962	0.991254	0.994294	0.993302	0.991041	0.998427	0.990799	0.998115	0.986844	0.991583	0.986583	0.989949	0.981905	0.991361	0.986122	0.973087	0.973699	0.977967	0.969635	0.974005	0.97383	0.963994	0.964874	0.968263	0.959621	0.970975	0.956054	0.961056	0.965779	0.957254	0.95985	0.964812	0.961447	0.964538	0.971338	0.945512	0.955059	0.947468	0.948959	0.95227	0.948846	0.946631	0.954889	0.95255	0.948127	0.944664	0.951063	0.950733
	140	1.00091	1.00083	1.00212	0.999205	0.997696	1.00334	0.996314	1.00465	0.985863	1.00186	0.996877	0.996802	0.990669	0.996489	0.988103	0.979012	0.982564	0.981915	0.971585	0.978731	0.975621	0.96993	0.968485	0.976296	0.960429	0.972476	0.957193	0.971504	0.967576	0.965234	0.963384	0.965273	0.967616	0.971775	0.978121	0.949084	0.955784	0.953525	0.958145	0.956404	0.953715	0.948271	0.959631	0.957603	0.95121	0.949746	0.957206	0.957462
	160	1.01149	1.01366	1.01014	1.01204	1.00908	1.01611	1.0051	1.0136	0.996118	1.01273	1.01237	1.0048	0.998855	1.00462	1.00087	0.987805	0.993494	0.988582	0.976454	0.982632	0.984822	0.979197	0.972692	0.980615	0.970041	0.976915	0.965185	0.975264	0.971441	0.974388	0.972995	0.976054	0.972403	0.976335	0.975645	0.950797	0.959326	0.959333	0.95987	0.961658	0.955747	0.947328	0.966761	0.9612	0.952883	0.951563	0.959796	0.960363
	180	1.02278	1.02293	1.02045	1.0205	1.01881	1.02368	1.01629	1.02508	1.00922	1.01915	1.01483	1.01495	1.00873	1.01241	1.00971	0.992593	1.00305	0.996434	0.983189	0.989306	0.988454	0.981323	0.979169	0.987564	0.978645	0.985165	0.971301	0.978166	0.981557	0.977361	0.97933	0.990486	0.978227	0.982873	0.978558	0.962384	0.969665	0.965696	0.969635	0.969568	0.967667	0.957983	0.975387	0.973063	0.96272	0.963444	0.970278	0.96706
	200	1.02853	1.02677	1.02795	1.02698	1.02381	1.02778	1.02483	1.03096	1.01786	1.02958	1.02276	1.02234	1.01132	1.01924	1.01661	0.997767	1.0084	1.00129	0.991237	0.995362	0.991693	0.985597	0.982704	0.991603	0.979394	0.986614	0.974887	0.985145	0.986381	0.978674	0.980836	0.995037	0.980811	0.988019	0.983511	0.96863	0.974633	0.972704	0.974069	0.977891	0.975481	0.965045	0.979243	0.979097	0.969371	0.967497	0.97296	0.973204
	220	1.034	1.03629	1.03331	1.0361	1.02879	1.03496	1.02782	1.03534	1.02565	1.03201	1.02853	1.03015	1.01698	1.02565	1.02133	1.00456	1.01416	1.00649	0.99428	1.0002	0.994521	0.989387	0.987248	0.994464	0.983342	0.989188	0.977716	0.987997	0.9859	0.981015	0.980787	0.993084	0.981814	0.987041	0.991798	0.969423	0.978357	0.974911	0.979413	0.979504	0.980549	0.967394	0.985208	0.981043	0.968782	0.966917	0.9745	0.973948
	240	1.04029	1.04302	1.04233	1.04362	1.03355	1.03994	1.0396	1.04322	1.03193	1.04029	1.03607	1.0382	1.02538	1.03227	1.02672	1.00786	1.01703	1.01397	1.0032	1.0032	1.00023	0.995374	0.990402	0.998877	0.985109	0.995617	0.982238	0.991018	0.989082	0.982721	0.984791	0.994481	0.984766	0.990496	0.989796	0.972531	0.980702	0.979913	0.986883	0.981134	0.982856	0.973132	0.987201	0.981832	0.974098	0.970654	0.978195	0.976124
	260	1.04941	1.05266	1.04974	1.04964	1.0442	1.04782	1.04527	1.05237	1.04092	1.04988	1.04477	1.04532	1.03466	1.03988	1.03273	1.01389	1.02439	1.02221	1.00584	1.00938	1.00666	1.0016	0.997273	1.00625	0.992976	1.00011	0.989253	0.998824	0.996559	0.989349	0.990715	0.994163	0.988266	0.993545	0.996558	0.978944	0.985832	0.983675	0.986359	0.987824	0.98857	0.980202	0.992326	0.984103	0.977257	0.973199	0.979077	0.975638
	280	1.05504	1.06123	1.05959	1.0564	1.0536	1.05898	1.05753	1.06364	1.05245	1.05829	1.05688	1.0541	1.04532	1.04915	1.0391	1.02128	1.03224	1.02932	1.01501	1.01338	1.01093	1.0088	1.00265	1.01135	0.99702	1.00274	0.998075	1.00266	1.00278	0.994232	0.995692	1.00174	0.990196	0.99626	0.998594	0.984342	0.993312	0.989676	0.995792	0.993479	0.9911	0.986456	0.998275	0.989559	0.980641	0.977056	0.984033	0.983005
	300	1.06122	1.0648	1.06481	1.06128	1.05624	1.0628	1.06582	1.06553	1.05642	1.06169	1.05604	1.05932	1.04591	1.05383	1.04252	1.02541	1.03761	1.03217	1.01853	1.02079	1.0161	1.009	1.00492	1.01526	0.99931	1.00468	0.996744	1.00584	1.00513	0.994863	0.997617	1.00241	0.990998	0.998266	1.00067	0.985508	0.994146	0.991847	0.997377	0.997416	0.994864	0.989654	0.999393	0.990247	0.981107	0.979335	0.983389	0.982452
	320	1.06148	1.06459	1.06516	1.06974	1.06147	1.06657	1.065	1.06958	1.05664	1.06207	1.0569	1.0646	1.04728	1.05432	1.04156	1.02332	1.03439	1.03254	1.01774	1.0204	1.01313	1.01109	1.00612	1.01586	1.00328	1.00604	0.996534	1.00599	1.00443	0.997297	0.992796	1.00024	0.991402	0.996983	1.00033	0.987371	0.991173	0.990698	0.996893	0.993863	0.994969	0.988617	1.00136	0.99163	0.979672	0.980419	0.983583	0.979482
	340	1.05794	1.06419	1.06367	1.06719	1.06016	1.06372	1.06305	1.06734	1.05117	1.05697	1.05725	1.05559	1.04123	1.04656	1.03487	1.01994	1.03498	1.02927	1.01575	1.01823	1.01474	1.0111	1.00338	1.01276	0.99911	1.0059	0.995936	1.00207	1.00447	0.994093	0.991267	0.996625	0.987627	0.996487	1.00067	0.987663	0.989949	0.988448	0.993978	0.988905	0.99166	0.985267	0.995986	0.990232	0.976792	0.974241	0.975576	0.979451
	360	1.04389	1.05156	1.05344	1.0579	1.05283	1.05426	1.0525	1.05657	1.04119	1.0455	1.04515	1.04663	1.0311	1.038	1.0255	1.01019	1.0281	1.0233	1.00603	1.00952	1.0083	1.0082	1.00015	1.00628	0.995293	0.997636	0.992366	0.994562	0.992872	0.983277	0.982848	0.991932	0.983976	0.988611	0.993883	0.981155	0.984418	0.979882	0.985816	0.981208	0.981788	0.978204	0.989299	0.980027	0.968527	0.969654	0.973173	0.97221
	380	1.02568	1.03513	1.03585	1.04218	1.03395	1.03641	1.04087	1.04068	1.02658	1.0326	1.03291	1.03059	1.02001	1.02387	1.01411	0.997166	1.01134	1.01081	0.994966	0.997694	1.00084	0.997258	0.992156	0.99894	0.98668	0.988347	0.981541	0.981213	0.978421	0.97113	0.97043	0.979632	0.9682	0.976099	0.978046	0.968155	0.968637	0.966134	0.973638	0.970832	0.968416	0.962026	0.97505	0.966966	0.955906	0.956525	0.960249	0.95823
	400	1.00817	1.01483	1.01562	1.01847	1.01714	1.01812	1.01802	1.02272	1.00994	1.01416	1.0168	1.01681	0.99955	1.00899	0.996762	0.98063	0.992867	0.995168	0.980524	0.985878	0.988226	0.985794	0.984369	0.987716	0.976554	0.979714	0.971324	0.973238	0.966151	0.957843	0.957872	0.964996	0.959502	0.963119	0.964103	0.953796	0.954381	0.953879	0.959808	0.95858	0.959656	0.951025	0.959149	0.95346	0.947731	0.946472	0.95151	0.948463
	420	0.99266	0.996692	0.999184	1.00444	0.999829	1.00225	1.00326	1.01131	0.997884	1.00628	1.00462	1.00379	0.992184	0.999135	0.990021	0.973704	0.982405	0.982128	0.972741	0.978678	0.981307	0.979626	0.976763	0.980342	0.967078	0.969505	0.958637	0.959682	0.959335	0.946961	0.947434	0.955655	0.946158	0.956334	0.951856	0.940774	0.94404	0.941973	0.94693	0.945424	0.94355	0.940004	0.947083	0.941284	0.932164	0.936507	0.939253	0.933371
	440	0.977174	0.979323	0.981005	0.987197	0.983638	0.98448	0.988142	0.993331	0.984336	0.993033	0.988111	0.98983	0.979896	0.988291	0.978266	0.964217	0.97017	0.971384	0.961139	0.967466	0.970311	0.973511	0.968789	0.970667	0.957323	0.95966	0.950449	0.954105	0.951725	0.939334	0.939245	0.945764	0.940559	0.946918	0.946891	0.935354	0.934245	0.931771	0.936588	0.931315	0.935909	0.928201	0.938672	0.928557	0.923931	0.929285	0.930396	0.926817
	460	0.956981	0.960008	0.963497	0.964269	0.964264	0.965444	0.967101	0.973348	0.963662	0.976407	0.971196	0.971945	0.960402	0.972253	0.964484	0.950902	0.956358	0.955195	0.949635	0.956315	0.958429	0.958118	0.951427	0.960442	0.945064	0.950369	0.940415	0.940607	0.939716	0.926127	0.928263	0.937779	0.932636	0.936768	0.934068	0.923012	0.922622	0.921402	0.924449	0.919281	0.923109	0.916652	0.925549	0.918453	0.911176	0.913899	0.920401	0.916758
	480	0.945252	0.948321	0.94703	0.950544	0.947943	0.954457	0.952388	0.960172	0.95074	0.962858	0.961151	0.957164	0.954325	0.963735	0.953659	0.942999	0.948161	0.946312	0.938018	0.945403	0.950501	0.947688	0.943956	0.947224	0.936511	0.94068	0.931806	0.931424	0.927311	0.915874	0.919248	0.926417	0.921648	0.926439	0.924795	0.91257	0.912685	0.911539	0.911496	0.909053	0.911707	0.90428	0.916635	0.910024	0.901202	0.902964	0.906792	0.905452
	500	0.93061	0.929232	0.931738	0.933464	0.93076	0.936818	0.934451	0.944585	0.936681	0.943473	0.946975	0.945523	0.935944	0.949782	0.942917	0.929946	0.938265	0.936849	0.930994	0.936525	0.941062	0.93671	0.936605	0.940808	0.930549	0.934615	0.924944	0.923611	0.920942	0.909713	0.91441	0.919066	0.914545	0.918892	0.916732	0.906492	0.906962	0.902172	0.903553	0.902787	0.904593	0.897845	0.906622	0.903609	0.896226	0.895967	0.899732	0.89886
	520	0.920836	0.92276	0.9181	0.922189	0.919676	0.924848	0.92518	0.933214	0.926081	0.932707	0.936541	0.935148	0.929515	0.941563	0.938426	0.923791	0.931627	0.931216	0.925569	0.927656	0.931775	0.930198	0.928163	0.932589	0.923465	0.92667	0.915746	0.915947	0.914575	0.902071	0.903986	0.912551	0.906663	0.911362	0.91095	0.897648	0.899993	0.89338	0.894695	0.891774	0.89244	0.887093	0.896302	0.895322	0.885543	0.88649	0.891712	0.889926
	540	0.908501	0.911045	0.909545	0.910885	0.910223	0.913099	0.912671	0.921595	0.911788	0.924671	0.925453	0.926676	0.92075	0.931851	0.928727	0.919172	0.924213	0.924221	0.917473	0.925265	0.926124	0.923221	0.920001	0.924985	0.92062	0.922314	0.912687	0.910584	0.90779	0.901643	0.903818	0.907107	0.904921	0.904334	0.906934	0.893095	0.892541	0.888207	0.889816	0.886649	0.890335	0.881445	0.895285	0.890342	0.883784	0.883564	0.887693	0.887125
	560	0.898333	0.89796	0.899179	0.902664	0.899373	0.903581	0.902547	0.91249	0.898819	0.911726	0.91463	0.914014	0.910776	0.921672	0.91744	0.912433	0.916445	0.916308	0.911272	0.916523	0.915357	0.913609	0.911103	0.920075	0.910256	0.914369	0.905752	0.905538	0.904633	0.895998	0.899562	0.904598	0.896304	0.901123	0.897065	0.888722	0.889014	0.886171	0.884265	0.88398	0.882515	0.877163	0.886174	0.885513	0.879846	0.879732	0.885788	0.881708
	580	0.888861	0.890583	0.892087	0.892022	0.892132	0.894933	0.892634	0.902404	0.894085	0.902369	0.905334	0.90512	0.900174	0.910681	0.909078	0.903764	0.909288	0.90847	0.90191	0.90965	0.910272	0.908446	0.905772	0.912097	0.905718	0.910738	0.897578	0.899461	0.903934	0.894498	0.89805	0.900682	0.892793	0.897596	0.894793	0.883342	0.883675	0.880199	0.879305	0.878982	0.879776	0.873145	0.886554	0.880347	0.8771	0.878527	0.879767	0.876552
	600	0.880594	0.880508	0.88245	0.883484	0.88203	0.886047	0.884754	0.891529	0.880432	0.892618	0.896185	0.896021	0.893416	0.904556	0.904408	0.894376	0.903974	0.901768	0.897019	0.903325	0.907861	0.902512	0.903175	0.907966	0.900737	0.906635	0.8964	0.897002	0.901652	0.894173	0.89695	0.900673	0.892387	0.893498	0.891537	0.88015	0.882576	0.8764	0.878924	0.878762	0.876323	0.871032	0.883124	0.880621	0.875716	0.876262	0.878627	0.873123
	620	0.872656	0.87354	0.87585	0.879374	0.879159	0.88015	0.876188	0.886986	0.876479	0.88526	0.891068	0.889823	0.885828	0.896462	0.897436	0.890117	0.896467	0.89366	0.889717	0.898943	0.90296	0.899525	0.897958	0.90151	0.895132	0.903911	0.891164	0.895404	0.896992	0.890288	0.895032	0.896367	0.888896	0.891032	0.890918	0.875465	0.880074	0.873428	0.874978	0.876344	0.872551	0.870392	0.881755	0.876897	0.871932	0.870623	0.874167	0.868185
	640	0.863912	0.865333	0.868953	0.868663	0.869134	0.871902	0.866272	0.875107	0.866977	0.87535	0.880431	0.883785	0.879228	0.890817	0.890068	0.881085	0.892105	0.889754	0.884916	0.891424	0.897431	0.895989	0.89307	0.897135	0.892212	0.900093	0.887816	0.890964	0.894193	0.887992	0.893124	0.895492	0.888486	0.88964	0.887686	0.874938	0.877434	0.87244	0.871486	0.874796	0.871916	0.867686	0.878898	0.876019	0.869289	0.871192	0.872926	0.869077
	660	0.85767	0.857704	0.859873	0.862268	0.858439	0.864968	0.85933	0.867575	0.859267	0.86931	0.872744	0.875637	0.872027	0.882818	0.883314	0.876684	0.884129	0.881621	0.878375	0.885604	0.89176	0.891333	0.887283	0.895005	0.885653	0.898432	0.886445	0.887528	0.892606	0.887654	0.889327	0.895532	0.885781	0.887678	0.889248	0.874621	0.875927	0.872023	0.867742	0.871287	0.871495	0.863482	0.874614	0.870851	0.866192	0.865202	0.867957	0.864591
	680	0.849334	0.853209	0.854472	0.854317	0.854855	0.858232	0.85408	0.858871	0.850789	0.85851	0.864033	0.866285	0.865338	0.875097	0.877363	0.866467	0.875564	0.876736	0.871361	0.880499	0.885385	0.882026	0.881664	0.887472	0.880331	0.891139	0.879833	0.882448	0.884633	0.881737	0.883552	0.889642	0.880782	0.884032	0.882524	0.867973	0.870627	0.867348	0.861876	0.864788	0.863192	0.858781	0.871243	0.866413	0.860664	0.861882	0.865807	0.861623
	700	0.845726	0.850138	0.849526	0.850606	0.850256	0.853942	0.849074	0.857888	0.846386	0.856504	0.862084	0.863192	0.860559	0.873004	0.872232	0.861164	0.871396	0.872901	0.869507	0.875746	0.883431	0.879049	0.877379	0.882843	0.878636	0.888711	0.875463	0.882161	0.885708	0.881603	0.886133	0.890993	0.880715	0.884714	0.883728	0.866859	0.870967	0.867569	0.86301	0.866397	0.865605	0.858156	0.871079	0.868555	0.858483	0.860188	0.862743	0.860558
	720	0.842851	0.845691	0.845261	0.848269	0.847116	0.850556	0.843716	0.852331	0.842923	0.847022	0.855705	0.857041	0.854605	0.864543	0.863653	0.855766	0.866995	0.864527	0.861071	0.870603	0.876364	0.872575	0.87133	0.88049	0.87306	0.880908	0.870293	0.878036	0.880029	0.875902	0.880517	0.88311	0.877861	0.875379	0.880886	0.864302	0.867611	0.860153	0.858722	0.862993	0.860675	0.85737	0.868039	0.865259	0.857304	0.856532	0.861651	0.858027
	740	0.83932	0.84254	0.843623	0.844471	0.842126	0.846812	0.843536	0.848309	0.838335	0.84477	0.852962	0.853632	0.85009	0.859936	0.862368	0.851337	0.864826	0.863938	0.859758	0.865637	0.871992	0.867766	0.865818	0.87593	0.86898	0.878883	0.867734	0.873836	0.877596	0.873104	0.878166	0.882107	0.876687	0.877028	0.877568	0.862232	0.868135	0.862053	0.859326	0.865623	0.861256	0.858014	0.868724	0.862884	0.856769	0.855931	0.859876	0.85914
	760	0.843753	0.843628	0.849331	0.845799	0.845852	0.848637	0.84576	0.851763	0.840995	0.849489	0.85473	0.854421	0.851527	0.860247	0.859885	0.850174	0.863908	0.863038	0.856056	0.866008	0.871048	0.868401	0.865287	0.875787	0.869002	0.87695	0.867306	0.87584	0.875463	0.871425	0.875671	0.881716	0.874295	0.87733	0.877491	0.861821	0.865676	0.860501	0.857976	0.862779	0.861063	0.854639	0.869474	0.863154	0.85688	0.854666	0.860925	0.859515
	780	0.836301	0.837674	0.840251	0.839134	0.835937	0.840417	0.836636	0.841471	0.831565	0.838889	0.843187	0.847268	0.84236	0.852496	0.852016	0.841624	0.855423	0.855724	0.849522	0.859214	0.862653	0.860944	0.858189	0.870542	0.863692	0.871458	0.864735	0.869923	0.874998	0.868571	0.870389	0.876901	0.873637	0.876238	0.875264	0.861067	0.864828	0.863346	0.861613	0.863061	0.861174	0.857172	0.867511	0.865282	0.859918	0.861435	0.864896	0.862936
	800	0.837063	0.836107	0.84158	0.839238	0.835453	0.841655	0.834955	0.843032	0.82999	0.836182	0.840503	0.839235	0.838082	0.846904	0.846235	0.834936	0.848464	0.84818	0.844494	0.850405	0.854639	0.855185	0.849744	0.862105	0.855444	0.866685	0.856081	0.862571	0.867682	0.862907	0.867188	0.872508	0.865465	0.869672	0.871077	0.854906	0.857602	0.853869	0.853522	0.856103	0.853741	0.849945	0.862006	0.858084	0.851514	0.850228	0.855283	0.857538
[truncated: 251 more columns]

## Sheet: 5erep3
left side	root1
		0	10	20	30	40	50	60	70	80	90	100	110	120	130	140	150	160	170	180	190	200	210	220	230	240	250	260	270	280	290	300	310	320	330	340	350	360	370	380	390	400	410	420	430	440	450	460	470
	0	0.945127	0.945335	0.952249	0.946568	0.948097	0.951766	0.948997	0.954554	0.954945	0.950542	0.953712	0.950273	0.94536	0.942079	0.954537	0.952712	0.954306	0.950191	0.950419	0.945469	0.942701	0.940659	0.949263	0.951103	0.950149	0.940392	0.949678	0.951312	0.950898	0.946678	0.944074	0.948646	0.944101	0.946313	0.938528	0.939419	0.93906	0.948157	0.943657	0.935061	0.946193	0.951399	0.939329	0.943865	0.935572	0.935166	0.944169	0.942249
	20	0.946868	0.948449	0.95388	0.951062	0.953558	0.954174	0.949848	0.956895	0.958666	0.953496	0.953203	0.955755	0.945586	0.942374	0.955865	0.951234	0.954095	0.951154	0.95168	0.945545	0.943162	0.941533	0.950688	0.950434	0.950136	0.942083	0.950901	0.951788	0.950078	0.949711	0.946116	0.94803	0.946203	0.945457	0.939327	0.941986	0.939052	0.949701	0.946246	0.938584	0.950209	0.954029	0.939026	0.948474	0.93729	0.93461	0.943865	0.943874
	40	0.954752	0.955984	0.960446	0.956662	0.959332	0.961926	0.954654	0.96264	0.964574	0.95929	0.961712	0.962657	0.950029	0.949178	0.963635	0.959694	0.961081	0.954911	0.955805	0.950861	0.946032	0.94671	0.954626	0.956664	0.956547	0.946953	0.954742	0.956392	0.950409	0.953304	0.949755	0.953712	0.951476	0.949946	0.944075	0.943797	0.945563	0.951813	0.94722	0.941347	0.951912	0.955946	0.943564	0.951039	0.941333	0.938481	0.94686	0.946193
	60	0.964859	0.966369	0.970027	0.96874	0.970702	0.969726	0.964502	0.972312	0.974341	0.971155	0.970469	0.9701	0.962994	0.955769	0.972208	0.965985	0.967619	0.965637	0.964096	0.958332	0.95312	0.956571	0.962588	0.9634	0.965589	0.952875	0.959045	0.961859	0.96037	0.957651	0.957827	0.959501	0.959379	0.957345	0.95259	0.951263	0.948714	0.959306	0.953619	0.947787	0.959821	0.962755	0.951039	0.955899	0.946326	0.944972	0.954451	0.954667
	80	0.972169	0.97503	0.981312	0.979032	0.978023	0.982263	0.978338	0.982136	0.984178	0.976892	0.982492	0.979002	0.969902	0.96618	0.980422	0.973498	0.974553	0.971556	0.972751	0.963812	0.960698	0.963316	0.966872	0.970775	0.97304	0.961322	0.966877	0.970495	0.968746	0.966576	0.963598	0.966801	0.964848	0.963458	0.95929	0.95979	0.956809	0.964179	0.962246	0.955118	0.968141	0.972055	0.957721	0.963912	0.952829	0.950629	0.961495	0.959357
	100	0.97936	0.984405	0.987382	0.985256	0.987452	0.992231	0.983873	0.990399	0.992185	0.987155	0.986723	0.986884	0.976556	0.972937	0.986151	0.98214	0.980983	0.978117	0.976327	0.971063	0.968742	0.969091	0.976494	0.977688	0.980522	0.967112	0.97338	0.976862	0.974959	0.973061	0.9689	0.969779	0.969488	0.968465	0.962316	0.967384	0.961453	0.967353	0.965209	0.957073	0.96872	0.972732	0.960929	0.96672	0.959587	0.955536	0.964338	0.962334
	120	0.98672	0.991028	0.995579	0.991195	0.996037	0.99486	0.990906	0.997585	0.999282	0.991478	0.992238	0.992109	0.983704	0.980005	0.99309	0.989914	0.985449	0.984458	0.985704	0.974806	0.973036	0.972052	0.980121	0.983312	0.985082	0.970607	0.979876	0.977234	0.979891	0.978595	0.972088	0.972137	0.974176	0.974848	0.969618	0.968306	0.963268	0.975652	0.967292	0.959429	0.976826	0.978522	0.963486	0.971557	0.960957	0.958775	0.969466	0.96579
	140	0.990075	0.996172	0.999448	0.996517	0.99564	0.997025	0.994025	1.00004	1.00405	0.994667	0.999165	0.995394	0.98664	0.98171	0.995933	0.993031	0.991018	0.989211	0.988657	0.97864	0.977178	0.978234	0.98113	0.986502	0.988037	0.971649	0.98025	0.981366	0.983634	0.979354	0.978912	0.974007	0.975682	0.97372	0.967286	0.966987	0.966271	0.976394	0.968092	0.95894	0.975923	0.976717	0.965611	0.972557	0.962328	0.961474	0.967968	0.964904
	160	0.996963	1.00075	1.00713	1.00265	1.00245	1.00381	0.999182	1.00786	1.00893	1.00501	1.00619	1.00434	0.995889	0.990736	1.00282	0.997955	0.993619	0.994895	0.993066	0.98951	0.98423	0.984299	0.987295	0.992194	0.991624	0.976065	0.984521	0.985252	0.987676	0.987442	0.985257	0.985019	0.98302	0.981876	0.977038	0.972288	0.971136	0.98094	0.973125	0.963973	0.981851	0.980634	0.973066	0.973501	0.969275	0.966264	0.974819	0.970821
	180	1.00023	1.00125	1.0089	1.00512	1.00799	1.00876	1.00139	1.01322	1.0086	1.00708	1.00633	1.00731	0.996831	0.995163	1.0012	0.998557	0.996494	0.997035	0.993923	0.991021	0.985721	0.984683	0.988198	0.992566	0.99404	0.975635	0.984871	0.985648	0.985563	0.985707	0.986259	0.985272	0.983451	0.980149	0.976115	0.973551	0.971125	0.976225	0.973429	0.965505	0.98247	0.983136	0.972084	0.974016	0.970553	0.961978	0.97622	0.973239
	200	1.00463	1.00584	1.01319	1.00909	1.01316	1.01115	1.00709	1.01666	1.01396	1.00982	1.01036	1.01081	0.998438	0.998045	1.00387	0.997656	0.995605	0.999505	0.996083	0.990598	0.986943	0.98459	0.989534	0.993001	0.993095	0.980268	0.986271	0.987636	0.98532	0.984836	0.986589	0.986594	0.980971	0.980706	0.980015	0.970778	0.967933	0.972158	0.972102	0.962978	0.979019	0.98242	0.971438	0.976019	0.969046	0.961718	0.971858	0.97083
	220	1.00845	1.01027	1.0187	1.01423	1.01832	1.01288	1.01035	1.02199	1.01894	1.01187	1.01556	1.01242	1.00229	0.997706	1.00886	0.996697	1.002	0.999866	0.999872	0.993763	0.988179	0.98593	0.99184	0.994715	0.99701	0.979757	0.987418	0.986924	0.989598	0.989425	0.987564	0.987227	0.985859	0.980747	0.976668	0.97293	0.968613	0.973423	0.972686	0.964841	0.982579	0.980847	0.969508	0.972686	0.968301	0.960722	0.971803	0.97103
	240	1.01677	1.01889	1.02515	1.01927	1.01889	1.01804	1.01419	1.02648	1.02824	1.01643	1.02138	1.01528	1.00654	1.00005	1.01018	1.00548	1.00416	1.00351	1.0023	0.997013	0.992344	0.988995	0.993724	0.996108	0.997737	0.977814	0.989695	0.991468	0.990307	0.990964	0.987702	0.987481	0.988528	0.983718	0.976995	0.97222	0.963602	0.976046	0.971248	0.964542	0.981693	0.981716	0.97002	0.973025	0.967899	0.966181	0.972202	0.971237
	260	1.01928	1.01735	1.02898	1.01959	1.02549	1.02151	1.01733	1.03449	1.03259	1.02345	1.02529	1.01776	1.00835	1.00539	1.01249	1.00879	1.00782	1.00676	1.00678	1.0013	0.996909	0.993088	0.994568	0.998181	0.997251	0.981401	0.993193	0.992489	0.992581	0.991404	0.988609	0.990941	0.987416	0.983643	0.978443	0.971904	0.968199	0.979848	0.972849	0.9642	0.983436	0.984796	0.973435	0.973927	0.971133	0.965996	0.97302	0.973969
	280	1.01866	1.01617	1.02963	1.02593	1.03001	1.02748	1.02299	1.03478	1.02986	1.02477	1.02724	1.01739	1.00806	1.00237	1.01423	1.00768	1.00889	1.00717	1.00616	1.00186	0.994233	0.991708	0.992423	1.00005	0.99875	0.980619	0.99078	0.99063	0.992101	0.987897	0.990242	0.987288	0.984657	0.980546	0.977274	0.97316	0.96764	0.977053	0.970082	0.962648	0.983047	0.982864	0.970202	0.973847	0.968534	0.963062	0.972332	0.973167
	300	1.01418	1.01483	1.02503	1.02158	1.02352	1.02639	1.0209	1.03201	1.02692	1.02256	1.02161	1.01961	1.01005	1.00182	1.01039	1.00576	1.00401	1.01011	1.00572	0.997364	0.990347	0.987727	0.990446	0.996237	0.995017	0.979246	0.98801	0.987803	0.990103	0.986431	0.987192	0.985817	0.982975	0.981091	0.977767	0.969808	0.965068	0.975891	0.969933	0.963532	0.97925	0.980275	0.969162	0.970537	0.966463	0.959594	0.969719	0.970473
	320	1.00753	1.00923	1.02129	1.01399	1.01851	1.0167	1.01516	1.02547	1.0204	1.01772	1.01745	1.01394	1.00454	0.998337	1.00503	1.00047	1.00177	1.00249	1.00291	0.995468	0.985861	0.984175	0.985706	0.98978	0.990742	0.975395	0.980503	0.981993	0.97996	0.978999	0.980643	0.981704	0.976523	0.973424	0.971855	0.963846	0.961648	0.973179	0.963246	0.960839	0.976325	0.97662	0.962558	0.964838	0.964265	0.956452	0.96552	0.965094
	340	1.00486	1.00371	1.01395	1.00548	1.01256	1.01407	1.01242	1.021	1.01804	1.01576	1.01649	1.01208	1.00567	0.99863	1.0057	1.00269	1.00327	1.00746	1.00334	0.996378	0.989289	0.984383	0.987169	0.991123	0.99098	0.975699	0.981873	0.984516	0.980858	0.980422	0.981506	0.981224	0.977147	0.974366	0.972332	0.963074	0.962794	0.972797	0.967704	0.959871	0.972407	0.977514	0.966278	0.968049	0.964413	0.955088	0.962341	0.963353
	360	0.992209	0.991442	1.00309	0.997706	1.00718	1.00095	1.00227	1.01322	1.0096	1.01199	1.01036	1.00576	1.00013	0.995084	1.00061	0.99649	0.998199	1.00252	0.997365	0.98998	0.982979	0.978124	0.982198	0.988634	0.985995	0.971015	0.979559	0.976435	0.977469	0.978174	0.975699	0.978783	0.973647	0.971702	0.970012	0.962667	0.960163	0.972512	0.966435	0.955804	0.972491	0.975411	0.960008	0.964245	0.959449	0.953114	0.959035	0.961356
	380	0.9781	0.980013	0.990355	0.987967	0.992126	0.988472	0.988449	0.998076	0.996511	0.999209	0.996655	0.993969	0.991934	0.988762	0.995508	0.990162	0.990697	0.99321	0.992231	0.984295	0.97857	0.975473	0.977968	0.982028	0.978943	0.962863	0.970251	0.970657	0.969292	0.970269	0.971393	0.969785	0.968509	0.963783	0.96307	0.957481	0.956817	0.966462	0.95958	0.950495	0.964512	0.966048	0.953884	0.959818	0.954386	0.947635	0.953857	0.953482
	400	0.966464	0.965967	0.978746	0.974445	0.979532	0.976989	0.974629	0.985538	0.980679	0.988641	0.989073	0.98624	0.986302	0.9793	0.984969	0.984551	0.987231	0.986953	0.98483	0.977041	0.973286	0.968584	0.972792	0.976565	0.974983	0.960981	0.967718	0.969066	0.968552	0.968488	0.964143	0.966473	0.962414	0.959844	0.958563	0.95572	0.954234	0.966433	0.95452	0.94763	0.960664	0.961913	0.947871	0.955192	0.947666	0.939844	0.949609	0.950574
	420	0.949947	0.951524	0.96615	0.961355	0.96434	0.961143	0.961677	0.97152	0.967777	0.971581	0.973544	0.970039	0.968853	0.966797	0.978175	0.97563	0.978041	0.977512	0.97442	0.971977	0.964663	0.962401	0.964499	0.966544	0.969399	0.955395	0.960369	0.958033	0.958242	0.961661	0.956964	0.959303	0.956813	0.95166	0.954632	0.949862	0.951298	0.958632	0.94664	0.938633	0.95218	0.955468	0.942435	0.94667	0.942229	0.935283	0.942714	0.94267
	440	0.943314	0.942815	0.956466	0.950274	0.955967	0.95255	0.951991	0.962158	0.963144	0.96766	0.966563	0.964847	0.965053	0.962367	0.973228	0.972514	0.972092	0.975271	0.971967	0.967134	0.963066	0.960875	0.966003	0.968638	0.967632	0.959504	0.960526	0.961149	0.959191	0.958627	0.956502	0.961158	0.955996	0.953727	0.953621	0.949664	0.947235	0.956525	0.947921	0.938119	0.948518	0.954711	0.942205	0.947698	0.940852	0.935114	0.942477	0.943315
	460	0.933797	0.929894	0.941872	0.937267	0.941012	0.939791	0.942749	0.947779	0.947463	0.953846	0.954677	0.953399	0.950968	0.951979	0.96386	0.961625	0.962449	0.967741	0.963271	0.960889	0.957617	0.955855	0.95908	0.963242	0.963469	0.952018	0.955658	0.954446	0.952733	0.952686	0.950544	0.952195	0.948293	0.946151	0.946096	0.942467	0.9407	0.949712	0.941288	0.934766	0.944813	0.947063	0.934622	0.938513	0.934116	0.928313	0.934441	0.93589
	480	0.918691	0.920276	0.929153	0.926709	0.927886	0.92804	0.928572	0.937544	0.935967	0.941818	0.944123	0.948341	0.938126	0.94095	0.951255	0.949154	0.954895	0.95869	0.956457	0.954227	0.951673	0.947743	0.956073	0.959199	0.95877	0.946977	0.947394	0.9485	0.947698	0.945909	0.944621	0.944738	0.942198	0.939009	0.938285	0.931389	0.929833	0.939048	0.932891	0.924117	0.934944	0.939777	0.926854	0.931987	0.928118	0.922736	0.928171	0.929188
	500	0.914242	0.913994	0.920502	0.917805	0.920153	0.918053	0.920385	0.931342	0.932853	0.936141	0.937312	0.940878	0.934979	0.934828	0.94556	0.946126	0.951334	0.95017	0.949479	0.949973	0.947526	0.948701	0.951884	0.957141	0.95658	0.94412	0.946647	0.948227	0.946902	0.945035	0.944244	0.94672	0.939734	0.938009	0.934959	0.929894	0.927347	0.938013	0.929977	0.923154	0.930379	0.937482	0.922061	0.929939	0.924191	0.918467	0.924318	0.927568
	520	0.901457	0.90534	0.91132	0.906912	0.908084	0.908341	0.910037	0.920653	0.920321	0.92391	0.927785	0.929633	0.92821	0.929055	0.935666	0.937217	0.941982	0.941503	0.942901	0.942392	0.941571	0.94027	0.945453	0.948923	0.950481	0.939071	0.942299	0.940466	0.9417	0.940213	0.938771	0.939799	0.93438	0.931951	0.928463	0.923766	0.922471	0.931065	0.924172	0.916756	0.928609	0.933351	0.921137	0.925791	0.921441	0.916834	0.921266	0.921606
	540	0.896132	0.896178	0.903871	0.899583	0.90091	0.902502	0.903917	0.9163	0.915912	0.920426	0.924176	0.92432	0.922469	0.923181	0.930314	0.932254	0.934832	0.93958	0.935152	0.935312	0.936745	0.937187	0.941997	0.943319	0.945457	0.93597	0.940392	0.935188	0.938796	0.934932	0.934308	0.936037	0.929111	0.925837	0.922175	0.918781	0.91536	0.926599	0.920405	0.913752	0.921436	0.926647	0.91322	0.921119	0.91391	0.912135	0.918175	0.916278
	560	0.897304	0.895531	0.902104	0.897813	0.899684	0.900828	0.903697	0.911572	0.91323	0.919246	0.920965	0.923967	0.9223	0.922536	0.931996	0.930841	0.934941	0.936437	0.93421	0.935456	0.93454	0.936823	0.939487	0.941921	0.942842	0.934787	0.938565	0.935982	0.936374	0.934361	0.932331	0.930279	0.92497	0.92318	0.920405	0.916635	0.916222	0.923567	0.915415	0.909599	0.919211	0.923829	0.91202	0.916051	0.911452	0.909083	0.913178	0.911738
	580	0.895077	0.893188	0.897747	0.894121	0.897917	0.899126	0.899551	0.91293	0.911581	0.91487	0.919739	0.921761	0.920226	0.920949	0.930493	0.928096	0.929177	0.932973	0.931273	0.930858	0.934248	0.93584	0.938967	0.942399	0.942777	0.932792	0.935658	0.936359	0.934721	0.93469	0.930468	0.933168	0.925699	0.924192	0.919156	0.915418	0.918579	0.924129	0.917491	0.911368	0.920166	0.923506	0.915397	0.918072	0.912879	0.908756	0.914474	0.913081
	600	0.887048	0.886745	0.894527	0.891263	0.891849	0.894945	0.895074	0.906778	0.907308	0.90996	0.913937	0.915913	0.913905	0.915827	0.925442	0.924399	0.927242	0.926717	0.928622	0.927502	0.929389	0.930855	0.932422	0.93659	0.936216	0.927527	0.934577	0.931692	0.931253	0.930443	0.9285	0.931081	0.925563	0.92219	0.916163	0.913047	0.913745	0.92117	0.91462	0.909677	0.920663	0.925302	0.91032	0.914982	0.909223	0.909951	0.912635	0.91179
	620	0.884237	0.881657	0.890469	0.885578	0.88542	0.888415	0.888593	0.898069	0.900272	0.900319	0.902466	0.906947	0.905523	0.907295	0.918034	0.917863	0.920249	0.923201	0.922165	0.92283	0.921773	0.921701	0.925531	0.930478	0.929825	0.922787	0.925904	0.925405	0.928167	0.924262	0.922168	0.922766	0.920359	0.913997	0.910894	0.909182	0.909585	0.916789	0.911963	0.904936	0.915082	0.920452	0.905675	0.910091	0.906175	0.904751	0.908966	0.909116
	640	0.883404	0.879696	0.88953	0.884651	0.88738	0.884406	0.885936	0.896233	0.896886	0.898711	0.902538	0.903502	0.903546	0.902144	0.915892	0.91559	0.921547	0.920175	0.922119	0.919935	0.91792	0.921382	0.927772	0.930404	0.930847	0.91954	0.925153	0.928561	0.92591	0.923159	0.917501	0.925432	0.919635	0.91834	0.912569	0.910246	0.91108	0.919039	0.910995	0.903214	0.914457	0.919582	0.906851	0.911693	0.906813	0.902664	0.907777	0.907011
	660	0.877307	0.874123	0.883285	0.877579	0.880343	0.883189	0.879288	0.888148	0.88647	0.887883	0.890329	0.894137	0.892285	0.892155	0.906678	0.909176	0.915064	0.916601	0.914712	0.915959	0.912349	0.911587	0.919297	0.923783	0.924042	0.917239	0.919068	0.920663	0.919532	0.916802	0.916577	0.92007	0.915045	0.910978	0.90689	0.905806	0.90699	0.911459	0.909063	0.901389	0.91265	0.915883	0.907762	0.907954	0.902593	0.89899	0.906188	0.904096
	680	0.873818	0.871987	0.877942	0.876095	0.874834	0.876304	0.8743	0.882298	0.885216	0.884916	0.887407	0.891981	0.884941	0.890674	0.902078	0.906869	0.90918	0.913334	0.911168	0.909463	0.908262	0.911329	0.917519	0.923268	0.923333	0.913065	0.91663	0.918551	0.918176	0.915219	0.916046	0.916214	0.91522	0.912847	0.908661	0.903644	0.90384	0.910903	0.906584	0.898729	0.912962	0.916796	0.903146	0.905842	0.899554	0.895568	0.904078	0.90251
	700	0.871568	0.869073	0.876019	0.87534	0.870236	0.874481	0.871204	0.878561	0.88017	0.878049	0.880859	0.883082	0.883002	0.882066	0.897677	0.901799	0.90334	0.906585	0.90724	0.905013	0.903987	0.908892	0.913612	0.91649	0.919589	0.906578	0.913505	0.913545	0.912727	0.912092	0.912912	0.912878	0.9097	0.90896	0.904443	0.901475	0.900589	0.909633	0.903475	0.895956	0.907468	0.912267	0.900075	0.904533	0.896759	0.892732	0.902036	0.900655
	720	0.868109	0.86773	0.873615	0.869539	0.871154	0.871151	0.868819	0.874534	0.878197	0.874604	0.880166	0.880723	0.880586	0.879025	0.893839	0.89826	0.901871	0.903564	0.904635	0.901121	0.902358	0.906376	0.912335	0.915215	0.919362	0.909149	0.912236	0.913683	0.913307	0.913989	0.9139	0.911282	0.90962	0.907223	0.908072	0.901753	0.902193	0.908963	0.903757	0.896261	0.909748	0.913354	0.902665	0.904655	0.898337	0.894378	0.904239	0.901856
	740	0.867237	0.866719	0.873672	0.86772	0.868528	0.871506	0.866506	0.871867	0.877142	0.875399	0.877663	0.88018	0.877797	0.877608	0.890039	0.895989	0.898172	0.897607	0.902319	0.900778	0.901458	0.903293	0.908377	0.914689	0.913878	0.902611	0.906976	0.911935	0.907976	0.912685	0.908647	0.908179	0.907163	0.905596	0.903021	0.899785	0.900633	0.907443	0.902332	0.896418	0.906791	0.908855	0.898831	0.901216	0.897046	0.894436	0.89795	0.900285
	760	0.866759	0.86684	0.871758	0.868793	0.869365	0.871733	0.867076	0.872624	0.872521	0.87559	0.876932	0.877607	0.877364	0.878413	0.89232	0.894254	0.89726	0.900641	0.902351	0.902137	0.901096	0.904144	0.908626	0.910875	0.913435	0.903889	0.909954	0.912547	0.912991	0.908471	0.911214	0.911165	0.909703	0.909043	0.904496	0.902133	0.900386	0.908149	0.904428	0.897115	0.907991	0.912989	0.901457	0.907354	0.899556	0.895617	0.902527	0.902599
	780	0.868632	0.864234	0.872833	0.868585	0.867014	0.870293	0.864887	0.871851	0.874339	0.872974	0.873969	0.876816	0.875364	0.875371	0.892391	0.891767	0.895132	0.897433	0.898206	0.896545	0.896758	0.903092	0.904622	0.909782	0.909718	0.900191	0.90512	0.909276	0.907767	0.908017	0.907226	0.906276	0.906697	0.906822	0.902203	0.899927	0.897912	0.903828	0.901741	0.895841	0.908741	0.909812	0.90066	0.904226	0.895136	0.891725	0.900733	0.897412
	800	0.865415	0.864869	0.869911	0.868436	0.868175	0.871496	0.866168	0.872327	0.874788	0.875786	0.875426	0.875673	0.874197	0.874338	0.888194	0.889979	0.891545	0.896396	0.900269	0.89821	0.896869	0.899625	0.904727	0.908828	0.909181	0.898776	0.902614	0.906571	0.908287	0.906982	0.905496	0.908716	0.90457	0.903978	0.903585	0.898833	0.899484	0.904484	0.902885	0.89436	0.909241	0.910407	0.901996	0.901638	0.896385	0.893475	0.899471	0.900503
	820
[truncated: 550 more columns]

## Sheet: 5erep4
	root 1
	RIGHT	0	1	2	3	4	5	6	7	8	9	10	11	12	13	14	15	16	17	18	19	20	21	22	23	24	25	26	27	28	29	30	31	32	33	34	35	36	37	38	39	40	41	42	43	44	45	46	47
	0	0.950652	0.943316	0.952617	0.950572	0.948397	0.957867	0.948558	0.953922	0.95098	0.956843	0.956572	0.942142	0.949207	0.950333	0.948984	0.95255	0.948263	0.946337	0.948671	0.945406	0.945169	0.947775	0.95754	0.943428	0.93724	0.949659	0.944791	0.948825	0.928394	0.947623	0.949168	0.953053	0.944785	0.951052	0.948127	0.940834	0.930876	0.947412	0.932931	0.939956	0.950577	0.93676	0.938941	0.947139	0.94088	0.943988	0.932312	0.945095
	20	0.953653	0.946207	0.95739	0.955033	0.952793	0.963983	0.952936	0.956752	0.955089	0.960631	0.954287	0.947707	0.952201	0.952834	0.948666	0.953471	0.948317	0.948202	0.949257	0.947371	0.943946	0.946379	0.955436	0.942813	0.938595	0.943961	0.941924	0.945574	0.925746	0.948074	0.950559	0.950582	0.941836	0.950032	0.950144	0.93858	0.934067	0.942762	0.933993	0.941359	0.947814	0.934912	0.940707	0.945208	0.941118	0.942701	0.934035	0.94377
	40	0.95962	0.953292	0.964156	0.964462	0.958125	0.970333	0.959848	0.964171	0.963101	0.967415	0.964774	0.952097	0.959656	0.959402	0.957413	0.958908	0.956712	0.955195	0.954928	0.953487	0.950717	0.951723	0.958335	0.944702	0.94097	0.950771	0.947812	0.951593	0.929591	0.951619	0.952594	0.956397	0.947309	0.952573	0.953446	0.941014	0.937576	0.947566	0.94111	0.944756	0.952427	0.937762	0.944068	0.950634	0.944628	0.948173	0.939633	0.951032
	60	0.971231	0.968056	0.975463	0.974232	0.971511	0.984854	0.970677	0.972745	0.971923	0.979336	0.971995	0.962382	0.971745	0.969609	0.963658	0.967704	0.965291	0.961876	0.962725	0.961071	0.956359	0.959951	0.968748	0.953235	0.948341	0.956985	0.952991	0.957362	0.938506	0.958402	0.959493	0.960193	0.952791	0.958376	0.956723	0.944946	0.942405	0.953554	0.945178	0.953521	0.955776	0.945049	0.949498	0.953115	0.949628	0.95389	0.945392	0.955791
	80	0.983504	0.977954	0.984572	0.981966	0.982245	0.991341	0.976726	0.982785	0.981508	0.98629	0.981537	0.97462	0.980289	0.980341	0.972407	0.976266	0.973286	0.970739	0.969018	0.968253	0.961717	0.965191	0.973724	0.959907	0.955649	0.96521	0.959943	0.963741	0.945207	0.968089	0.967951	0.971023	0.964287	0.966517	0.967901	0.957723	0.951158	0.963528	0.95336	0.959859	0.964942	0.954295	0.961796	0.965524	0.960839	0.96623	0.956388	0.970899
	100	0.991251	0.984483	0.989692	0.988485	0.989292	1.0016	0.983297	0.9898	0.987613	0.993198	0.989335	0.98012	0.985613	0.983683	0.978258	0.97719	0.978211	0.977704	0.974026	0.970878	0.966646	0.966761	0.976826	0.965569	0.955383	0.965532	0.962425	0.968074	0.948117	0.966763	0.969272	0.974462	0.967294	0.969729	0.971943	0.960986	0.956662	0.966152	0.958644	0.967299	0.97344	0.960935	0.964009	0.969584	0.965492	0.973351	0.965551	0.978515
	120	0.998701	0.994684	0.999271	0.999798	0.999868	1.01074	0.991231	0.997369	0.996051	1.0023	0.994747	0.990125	0.992133	0.994833	0.986521	0.986697	0.983398	0.981159	0.978614	0.9765	0.971329	0.974301	0.982871	0.968304	0.961783	0.971622	0.971753	0.97077	0.949538	0.97377	0.976062	0.981718	0.973735	0.978434	0.978707	0.963786	0.963226	0.973051	0.96663	0.973761	0.977577	0.965552	0.974094	0.976577	0.971917	0.980616	0.974374	0.988404
	140	1.00692	1.00401	1.00955	1.00664	1.00843	1.0225	1.00118	1.00777	1.0083	1.01173	1.00514	0.997054	1.003	1.00559	0.995853	0.995782	0.993132	0.992655	0.986876	0.985662	0.978384	0.982904	0.990335	0.979002	0.971657	0.978213	0.973655	0.976252	0.958371	0.980789	0.981313	0.987545	0.978833	0.98423	0.985483	0.972209	0.969541	0.978753	0.974161	0.983635	0.985154	0.973645	0.98076	0.985798	0.978743	0.989387	0.982034	0.996292
	160	1.01538	1.00933	1.0139	1.01507	1.01361	1.0268	1.00772	1.01533	1.01617	1.01813	1.01161	1.00524	1.00631	1.01164	1.00239	1.00122	0.999412	0.998925	0.99354	0.991782	0.985183	0.989179	0.995519	0.98245	0.975866	0.983001	0.978489	0.982249	0.960173	0.9879	0.986707	0.991369	0.983834	0.990431	0.990151	0.978641	0.975133	0.984928	0.979245	0.988071	0.993014	0.978844	0.989885	0.99506	0.990057	0.998614	0.991875	1.00447
	180	1.019	1.01421	1.01759	1.01872	1.02289	1.02877	1.01235	1.01731	1.01724	1.0229	1.01606	1.01151	1.01394	1.01614	1.00363	1.00484	1.00228	1.00101	1.00097	0.994182	0.989936	0.989852	0.997911	0.985791	0.977295	0.987776	0.981321	0.984606	0.963406	0.986528	0.987577	0.994263	0.983892	0.984387	0.990691	0.977466	0.976048	0.985855	0.982709	0.991352	0.996349	0.980557	0.993541	0.997328	0.995057	0.999995	0.991007	1.00964
	200	1.02466	1.01951	1.0245	1.0236	1.02636	1.03649	1.01734	1.02283	1.02417	1.02904	1.02105	1.01436	1.02046	1.0206	1.00949	1.01012	1.00564	1.0083	1.00242	0.998761	0.989583	0.992385	1.00196	0.993272	0.979847	0.989169	0.982097	0.98253	0.965568	0.989165	0.989054	0.993379	0.982608	0.984197	0.988979	0.97743	0.975415	0.983451	0.982807	0.993791	0.994351	0.985267	0.993626	1.00011	0.994799	1.00168	0.997167	1.00901
	220	1.02613	1.02226	1.0291	1.03036	1.03084	1.04134	1.01845	1.02735	1.029	1.03545	1.02856	1.02023	1.02454	1.02739	1.014	1.01449	1.01078	1.01124	1.00566	1.00268	0.995422	0.99579	1.00545	0.995603	0.985976	0.99456	0.987671	0.986651	0.969114	0.990189	0.991814	0.995178	0.985772	0.988441	0.991308	0.979247	0.979804	0.986521	0.983483	0.993994	0.996099	0.987051	1.00015	1.00464	0.998091	1.00793	0.9979	1.01442
	240	1.03521	1.03523	1.03437	1.03889	1.03962	1.0502	1.02829	1.03269	1.03659	1.04121	1.03675	1.02559	1.03194	1.03606	1.02043	1.02083	1.01863	1.01932	1.01251	1.0086	1.00191	1.00419	1.0124	1.00343	0.992728	0.999861	0.989919	0.991483	0.970667	0.992955	0.991621	0.998045	0.986652	0.989096	0.990819	0.980569	0.97938	0.982849	0.986086	0.994775	0.997326	0.988134	0.998175	1.00339	1.0009	1.00857	0.996871	1.01226
	260	1.04203	1.0369	1.0415	1.04557	1.04654	1.05623	1.0342	1.04168	1.04059	1.04703	1.04187	1.03705	1.04009	1.04154	1.02829	1.02755	1.02552	1.02451	1.02192	1.01584	1.00817	1.01132	1.0196	1.0062	0.996387	1.00289	0.995166	0.994794	0.97375	0.995157	0.995669	0.998325	0.989787	0.994669	0.994741	0.984374	0.982601	0.985251	0.989753	0.999817	1.00227	0.990758	1.0026	1.009	1.0062	1.01388	1.00183	1.01948
	280	1.02293	1.01909	1.02212	1.03042	1.02957	1.0413	1.01958	1.02806	1.02782	1.03693	1.03383	1.02584	1.03007	1.03219	1.02092	1.02408	1.0173	1.02036	1.01364	1.01193	1.00384	1.0067	1.01579	1.00665	0.997731	1.00516	0.992867	0.992701	0.973498	0.992508	0.994597	1.00044	0.988254	0.992943	0.992265	0.985107	0.98179	0.985123	0.988848	0.998401	0.999232	0.989207	1.00296	1.00767	1.00528	1.01514	0.99945	1.01651
	300	1.02581	1.02017	1.02683	1.02913	1.03169	1.03969	1.01817	1.02394	1.0266	1.03095	1.0251	1.01844	1.02174	1.02132	1.00769	1.01352	1.00598	1.00553	1.00003	0.994897	0.991867	0.991175	1.00031	0.991461	0.979837	0.987298	0.975678	0.972301	0.958091	0.975608	0.976715	0.980566	0.9688	0.974697	0.97242	0.963336	0.961216	0.964214	0.968551	0.974683	0.974485	0.970387	0.983982	0.989304	0.988107	0.99433	0.982519	0.99852
	320	1.03975	1.04176	1.04298	1.04569	1.04932	1.06108	1.03941	1.04557	1.04509	1.05119	1.04702	1.03593	1.04572	1.04415	1.0298	1.03443	1.02576	1.0294	1.02239	1.0186	1.01526	1.01405	1.02072	1.01397	0.996459	1.00855	0.991782	0.992621	0.972773	0.990871	0.992372	0.99467	0.983877	0.985306	0.986227	0.975543	0.973377	0.975591	0.978039	0.98339	0.982391	0.976585	0.989675	0.992366	0.98721	0.994292	0.981284	0.999147
	340	1.04534	1.04935	1.05041	1.05648	1.05911	1.07193	1.05182	1.05187	1.05012	1.05714	1.05364	1.04323	1.05014	1.05188	1.0379	1.04111	1.03288	1.03236	1.0331	1.02469	1.02274	1.02388	1.02862	1.02071	1.00636	1.01564	0.998488	0.999861	0.977932	0.997153	0.996997	0.998383	0.98869	0.993644	0.988727	0.98415	0.981247	0.982569	0.984433	0.98856	0.986296	0.983627	0.997213	1.00402	1.001	1.00288	0.990683	1.00692
	360	1.0601	1.05691	1.06381	1.07112	1.07373	1.08346	1.06239	1.06451	1.06292	1.06963	1.06801	1.05663	1.06683	1.06258	1.04981	1.05319	1.04005	1.04328	1.04299	1.03664	1.03265	1.03381	1.04142	1.03508	1.0182	1.02525	1.0099	1.00818	0.986202	1.00374	1.00549	1.0066	0.99534	1.00208	0.997956	0.98958	0.988655	0.990068	0.99031	0.993106	0.992582	0.985948	0.99856	1.00699	1.00493	1.00524	0.99248	1.00995
	380	1.06297	1.06038	1.06411	1.077	1.07831	1.08801	1.06818	1.06792	1.06239	1.07125	1.07128	1.05903	1.06784	1.06553	1.05038	1.05494	1.0424	1.04566	1.04734	1.0394	1.03876	1.04059	1.04823	1.03978	1.02098	1.02681	1.01425	1.01204	0.989276	1.0064	1.00887	1.01024	0.997143	1.00389	0.996136	0.991967	0.988561	0.993856	0.989015	0.990862	0.991327	0.985159	0.999296	1.00545	1.00355	1.00507	0.990592	1.00422
	400	1.05492	1.05377	1.05589	1.07056	1.07229	1.0829	1.06298	1.0614	1.06052	1.06538	1.06409	1.05598	1.06546	1.05895	1.04622	1.0476	1.03587	1.04101	1.04457	1.03657	1.03493	1.034	1.04405	1.03452	1.01806	1.02343	1.01006	1.00846	0.982132	1.00026	1.00681	1.0103	0.994801	1.00209	0.993633	0.98592	0.98391	0.984358	0.981948	0.98322	0.987757	0.979926	0.991523	0.996283	0.995641	0.995468	0.980179	1.0013
	420	1.0448	1.04437	1.04585	1.05797	1.06132	1.06962	1.05026	1.04931	1.05024	1.05472	1.05629	1.042	1.05123	1.04502	1.03177	1.03764	1.02505	1.03229	1.03374	1.02406	1.02449	1.02885	1.03503	1.03009	1.01016	1.01495	0.997083	1.00008	0.975613	0.992016	1.00291	1.00046	0.989434	0.9936	0.984058	0.980337	0.974573	0.976183	0.971858	0.972441	0.976161	0.969301	0.978173	0.983223	0.980891	0.980296	0.971422	0.986712
	440	1.02822	1.03117	1.03327	1.04036	1.04362	1.05244	1.03919	1.04064	1.04125	1.04675	1.04607	1.03346	1.03909	1.03545	1.0214	1.02468	1.0168	1.02213	1.02781	1.01769	1.01398	1.02014	1.02878	1.01946	1.00413	1.0055	0.990732	0.990385	0.969859	0.984002	0.993012	0.9959	0.97941	0.983781	0.977177	0.971027	0.967818	0.967111	0.96092	0.95997	0.965427	0.957795	0.965097	0.970532	0.967625	0.967428	0.959565	0.972581
	460	1.00605	1.00488	1.00961	1.01709	1.01716	1.0289	1.01531	1.02011	1.01451	1.02387	1.02295	1.01198	1.01811	1.01071	0.999587	1.0027	0.994165	0.999579	1.00347	0.994306	0.993702	0.996668	1.00907	1.00294	0.987327	0.993976	0.977904	0.976734	0.954274	0.96614	0.981374	0.980563	0.966252	0.972245	0.96131	0.95911	0.95643	0.955088	0.950153	0.950849	0.955907	0.943661	0.952419	0.958123	0.9565	0.956767	0.950049	0.961493
	480	0.989607	0.988807	0.99354	1.00044	0.998621	1.00912	0.998861	1.00114	1.00064	1.00958	1.0085	0.995136	1.00194	0.991687	0.982487	0.986762	0.977922	0.982753	0.988327	0.980533	0.980354	0.98485	0.996941	0.989489	0.976445	0.980026	0.967654	0.965324	0.944829	0.958455	0.964572	0.966798	0.951818	0.959259	0.948696	0.9433	0.941126	0.940425	0.934172	0.93291	0.93677	0.927531	0.935059	0.942539	0.942067	0.942034	0.933873	0.943383
	500	0.970069	0.971461	0.974602	0.978755	0.977132	0.988282	0.977498	0.983383	0.982105	0.989069	0.99121	0.977267	0.983962	0.972454	0.965962	0.969525	0.962819	0.966475	0.969348	0.961675	0.9615	0.962741	0.976112	0.967572	0.958747	0.964751	0.953299	0.95318	0.931241	0.945193	0.952303	0.950165	0.938031	0.945261	0.937929	0.932628	0.926241	0.93106	0.925829	0.9232	0.927346	0.917099	0.923053	0.930126	0.931275	0.930947	0.922196	0.930059
	520	0.956606	0.959552	0.957847	0.961484	0.962248	0.971376	0.960838	0.966986	0.969519	0.976993	0.977631	0.964851	0.970118	0.963272	0.95318	0.957509	0.947522	0.954192	0.956921	0.951816	0.950389	0.952023	0.963493	0.957366	0.94778	0.953044	0.940003	0.94437	0.921828	0.936979	0.939508	0.939575	0.9278	0.932076	0.926306	0.920425	0.916046	0.91836	0.914622	0.912484	0.917074	0.907229	0.910025	0.91714	0.91947	0.917765	0.909574	0.916569
	540	0.944904	0.943355	0.947024	0.953873	0.948662	0.958845	0.949411	0.954414	0.955137	0.96542	0.96012	0.953191	0.953797	0.950296	0.941197	0.944206	0.935754	0.940409	0.944639	0.93724	0.93734	0.9414	0.947067	0.939427	0.93348	0.941538	0.92994	0.933477	0.912169	0.92427	0.929172	0.928536	0.916912	0.922729	0.917921	0.908575	0.907787	0.907737	0.903024	0.902141	0.909956	0.898731	0.900816	0.907241	0.907104	0.906385	0.901393	0.909827
	560	0.933219	0.931836	0.935994	0.941009	0.938344	0.945659	0.937326	0.943059	0.945437	0.954406	0.949062	0.940534	0.945776	0.941264	0.931242	0.936615	0.930733	0.931738	0.934442	0.93318	0.928338	0.933406	0.940873	0.935287	0.927848	0.93534	0.921981	0.924888	0.904326	0.920544	0.923362	0.921495	0.912987	0.917141	0.913206	0.903614	0.898861	0.905341	0.89785	0.897758	0.902723	0.89293	0.896061	0.899528	0.898442	0.89788	0.891646	0.900472
	580	0.924845	0.923504	0.928695	0.933034	0.928741	0.935558	0.928904	0.936275	0.933011	0.943233	0.939284	0.93048	0.934092	0.930167	0.922943	0.927079	0.923039	0.925597	0.927163	0.920487	0.918203	0.921353	0.93137	0.922779	0.916688	0.924071	0.914133	0.914702	0.894614	0.911288	0.91504	0.911996	0.902917	0.910334	0.901463	0.895144	0.891535	0.895441	0.889461	0.890588	0.896785	0.887822	0.888827	0.892486	0.892702	0.891236	0.883224	0.890464
	600	0.913569	0.912606	0.91913	0.91874	0.918008	0.926369	0.917377	0.925168	0.921884	0.931675	0.927879	0.919194	0.924306	0.92206	0.914872	0.922275	0.917411	0.920957	0.92288	0.91558	0.913763	0.917506	0.925494	0.918317	0.911411	0.917793	0.909337	0.913252	0.891457	0.908303	0.910803	0.909372	0.898027	0.904098	0.900267	0.893238	0.886347	0.892613	0.887282	0.887185	0.892478	0.884484	0.883722	0.885813	0.883789	0.88666	0.881592	0.888475
	620	0.911817	0.911275	0.916988	0.91733	0.912806	0.920843	0.914127	0.919601	0.9174	0.926676	0.922318	0.911131	0.917948	0.915724	0.91082	0.916621	0.911036	0.914878	0.914334	0.910016	0.907804	0.911075	0.917588	0.910932	0.90477	0.909911	0.902256	0.90223	0.88248	0.900606	0.901532	0.900484	0.891502	0.897693	0.890709	0.884437	0.875679	0.882047	0.878296	0.88092	0.887304	0.874223	0.874612	0.876214	0.877681	0.878313	0.8746	0.878011
	640	0.904702	0.900992	0.907086	0.908065	0.907537	0.913183	0.904516	0.912296	0.908101	0.917057	0.912874	0.904683	0.911622	0.909841	0.904164	0.910499	0.909493	0.910265	0.91087	0.908674	0.904213	0.90803	0.914031	0.903375	0.898933	0.905697	0.899336	0.900908	0.878906	0.899016	0.900685	0.897853	0.88823	0.894979	0.889879	0.884361	0.877499	0.880091	0.876141	0.879145	0.883822	0.872192	0.873584	0.875861	0.876363	0.876017	0.86977	0.876265
	660	0.899376	0.89545	0.899181	0.903443	0.899995	0.90787	0.900583	0.906098	0.903754	0.913597	0.908204	0.898288	0.906263	0.904239	0.900329	0.905977	0.904586	0.906403	0.905883	0.902911	0.900696	0.900255	0.909492	0.898912	0.895245	0.900857	0.892898	0.892812	0.875857	0.892265	0.892668	0.893621	0.881685	0.890088	0.883456	0.878572	0.871894	0.871923	0.869559	0.873531	0.876139	0.8674	0.866505	0.871857	0.868307	0.869673	0.862589	0.870694
	680	0.893096	0.890294	0.896005	0.898157	0.892413	0.900817	0.893357	0.901313	0.897003	0.903896	0.901427	0.894053	0.90018	0.900321	0.895858	0.90255	0.900526	0.901616	0.900492	0.899381	0.894284	0.895232	0.904528	0.895382	0.890192	0.897036	0.889663	0.891339	0.869963	0.888413	0.889132	0.889265	0.880301	0.884228	0.881916	0.875278	0.866667	0.871039	0.866181	0.869687	0.873728	0.864101	0.862339	0.871032	0.864111	0.866417	0.86011	0.867629
	700	0.894581	0.888266	0.890994	0.890943	0.887701	0.898193	0.888437	0.894291	0.892832	0.898448	0.896688	0.888638	0.897155	0.894483	0.893403	0.894272	0.896861	0.895858	0.895838	0.893033	0.892405	0.889245	0.89999	0.892077	0.885126	0.893131	0.885238	0.88897	0.866924	0.887608	0.888946	0.888034	0.878932	0.881483	0.880971	0.873612	0.867018	0.870345	0.865852	0.86722	0.87226	0.861193	0.861239	0.865296	0.863962	0.863089	0.855714	0.864485
	720	0.892964	0.889509	0.893964	0.89525	0.894347	0.90022	0.891584	0.894965	0.896415	0.902368	0.899076	0.891695	0.900563	0.898873	0.89231	0.899898	0.90021	0.899098	0.902303	0.897813	0.894567	0.894121	0.903199	0.889642	0.887568	0.893218	0.889004	0.889306	0.870924	0.890396	0.891901	0.891222	0.878822	0.883958	0.881979	0.874494	0.86715	0.87101	0.867148	0.869871	0.871822	0.863356	0.864067	0.867334	0.86167	0.865166	0.85395	0.862931
	740	0.883614	0.878141	0.881942	0.881462	0.884277	0.888625	0.878356	0.884349	0.883037	0.892182	0.887978	0.882148	0.890801	0.888052	0.884915	0.891126	0.891235	0.893927	0.892015	0.891593	0.887457	0.886339	0.89481	0.883842	0.879256	0.890176	0.885073	0.883956	0.868067	0.883614	0.888589	0.890591	0.879723	0.885017	0.881609	0.87461	0.869441	0.872182	0.868621	0.870967	0.873859	0.864725	0.867152	0.869088	0.866826	0.867701	0.859068	0.867414
	760	0.880151	0.876825	0.880668	0.880042	0.877515	0.885183	0.872871	0.879808	0.878338	0.88568	0.880697	0.876472	0.881606	0.881336	0.8779	0.884365	0.886728	0.886422	0.884451	0.881607	0.880419	0.879971	0.889264	0.877386	0.874048	0.882078	0.876612	0.877116	0.858929	0.879828	0.882022	0.882302	0.870507	0.876177	0.873493	0.863267	0.856445	0.862291	0.857792	0.861849	0.865672	0.857906	0.859506	0.861278	0.855941	0.858296	0.849988	0.856959
	780	0.871414	0.869041	0.872055	0.875326	0.872365	0.879662	0.865723	0.874331	0.871122	0.878363	0.875664	0.867287	0.874009	0.875881	0.871833	0.878166	0.877557	0.876963	0.876474	0.876577	0.871743	0.873828	0.881185	0.870909	0.864274	0.878009	0.872259	0.871867	0.856237	0.873697	0.877238	0.878206	0.867938	0.872005	0.869406	0.862771	0.857304	0.86216	0.855091	0.860648	0.863331	0.853462	0.856052	0.858406	0.856534	0.853227	0.847519	0.856839
	LEFT	0	1	2	3	4	5	6	7	8	9	10	11	12	13	14	15	16	17	18	19	20	21	22	23	24	25	26	27	28	29	30	31	32	33	34	35	36	37	38	39	40	41	42	43	44	45	46	47
	0	0.948304	0.941262	0.953161	0.950615	0.94732	0.956232	0.952256	0.950173	0.949527	0.955505	0.955516	0.944657	0.951473	0.948197	0.948266	0.952051	0.948028	0.948558	0.94843	0.944515	0.945964	0.949418	0.953602	0.944324	0.936369	0.94535	0.944537	0.949134	0.926702	0.946041	0.949841	0.951548	0.941206	0.949378	0.945858	0.9402	0.933925	0.944505	0.932603	0.938519	0.947464	0.939231	0.937824	0.946268	0.940689	0.940909	0.930711	0.943072
	20	0.952801	0.94918	0.958642	0.957195	0.953177	0.962587	0.95321	0.957607	0.956367	0.959492	0.95786	0.951278	0.955081	0.957099	0.952155	0.955437	0.950974	0.95248	0.954057	0.950773	0.949451	0.950487	0.959369	0.946321	0.942912	0.950171	0.948839	0.949785	0.932884	0.952399	0.955375	0.955245	0.945414	0.953144	0.949409	0.942646	0.932794	0.94486	0.934083	0.940655	0.947421	0.937771	0.941529	0.945403	0.943882	0.943495	0.933067	0.942986
	40	0.956292	0.95181	0.959445	0.959577	0.955825	0.965968	0.956061	0.961938	0.959239	0.96427	0.962424	0.950699	0.959766	0.956891	0.955773	0.958876	0.956562	0.956424	0.953923	0.952894	0.953383	0.952596	0.960956	0.949765	0.94269	0.954626	0.952039	0.952059	0.933749	0.953505	0.955986	0.955873	0.949959	0.956754	0.95354	0.946396	0.940778	0.948282	0.939606	0.944068	0.953595	0.940913	0.950379	0.950549	0.946579	0.947304	0.938437	0.948772
	60	0.961632	0.958424	0.967137	0.961053	0.959956	0.972438	0.961359	0.963257	0.964661	0.968417	0.963657	0.952369	0.963106	0.96244	0.960332	0.963423	0.961583	0.960384	0.957957	0.957041	0.952964	0.956302	0.964674	0.95293	0.948198	0.957073	0.953574	0.955511	0.935857	0.955264	0.957915	0.957804	0.950248	0.956958	0.952433	0.945547	0.940669	0.948211	0.94175	0.944833	0.953561	0.942042	0.946829	0.953588	0.948683	0.950045	0.937834	0.94707
	80	0.9662	0.962655	0.970342	0.965586	0.966137	0.975355	0.964625	0.967846	0.969109	0.973844	0.96774	0.960888	0.965851	0.968249	0.960155	0.968141	0.964548	0.962918	0.962939	0.96228	0.954483	0.959223	0.966633	0.957108	0.949224	0.958962	0.95601	0.960019	0.939102	0.959713	0.960943	0.957212	0.95321	0.9574	0.956854	0.946657	0.94125	0.952008	0.945959	0.947365	0.957023	0.945239	0.952918	0.955844	0.949996	0.951109	0.942725	0.951626
	100	0.978252	0.972089	0.976202	0.976754	0.973856	0.986679	0.973241	0.978226	0.976852	0.983091	0.977833	0.972407	0.976251	0.977251	0.970525	0.974223	0.9722	0.973789	0.967379	0.96847	0.962827	0.968529	0.972081	0.962538	0.954379	0.961693	0.961012	0.960825	0.944216	0.961249	0.963751	0.965913	0.958478	0.962343	0.962649	0.954714	0.944379	0.955442	0.948094	0.953161	0.959772	0.948823	0.955499	0.959124	0.95208	0.954061	0.94318	0.957717
	120	0.987527	0.984686	0.991057	0.987837	0.987837	0.997537	0.982124	0.989961	0.986113	0.993173	0.988862	0.98324	0.989147	0.99052	0.981391	0.98287	0.985463	0.979812	0.980015	0.977807	0.972626	0.975302	0.983819	0.969803	0.965914	0.972809	0.97234	0.973338	0.951334	0.971969	0.971064	0.976081	0.967462	0.971681	0.976705	0.96482	0.956144	0.962129	0.955725	0.964915	0.970646	0.959797	0.965371	0.968625	0.962182	0.965674	0.956241	0.969612
	140	0.997472	0.994642	0.996807	0.996995	0.996013	1.00954	0.991895	0.997176	0.995463	1.0036	0.99742	0.990768	0.997806	0.997822	0.990359	0.991284	0.994056	0.990902	0.989097	0.986689	0.981033	0.985229	0.99272	0.982157	0.976368	0.983975	0.981012	0.981366	0.959985	0.980897	0.980763	0.983627	0.974035	0.977254	0.982298	0.967715	0.965375	0.974298	0.962792	0.973037	0.977661	0.966739	0.975514	0.981028	0.970487	0.975906	0.966311	0.978197
	160	1.00661	1.0013	1.00848	1.00959	1.00731	1.0153	1.00055	1.00772	1.00511	1.01231	1.00804	1.00042	1.00585	1.00654	0.996699	1.0005	1.00139	1.00013	0.997281	0.994142	0.986768	0.990839	0.996839	0.988369	0.980497	0.992209	0.99002	0.986691	0.965831	0.987246	0.98676	0.988545	0.981809	0.985324	0.985161	0.974769	0.972445	0.979618	0.97271	0.979267	0.981768	0.973023	0.982298	0.986473	0.979665	0.983602	0.974181	0.986221
	180	1.01554	1.01094	1.01352	1.01645	1.01594	1.0251	1.00875	1.01375	1.01161	1.0194	1.01272	1.00702	1.01314	1.01556	1.00516	1.00981	1.00898	1.0069	1.00583	1.0014	0.995329	0.996511	1.00644	0.993726	0.98857	0.997694	0.993532	0.993384	0.974348	0.993076	0.990815	0.997327	0.988564	0.990591	0.992622	0.982914	0.976888	0.987631	0.981192	0.987246	0.988794	0.98028	0.989897	0.99218	0.985092	0.988205	0.980871	0.994071
	200	1.02139	1.01409	1.01904	1.02167	1.01731	1.02801	1.01116	1.01755	1.01656	1.02608	1.02009	1.01304	1.01668	1.02248	1.00982	1.01396	1.01345	1.01351	1.01012	1.00736	0.997666	0.999994	1.01065	1.00053	0.9901	1.00214	0.997444	0.992104	0.978591	0.99809	0.997095	0.998027	0.990566	0.996106	0.994704	0.985953	0.982493	0.987502	0.983817	0.99355	0.995138	0.983928	0.993476	0.996573	0.991444	0.995068	0.985035	1.00177
	220	1.02721	1.02268	1.02498	1.02756	1.02779	1.03532	1.01742	1.02347	1.02304	1.03157	1.02516	1.01818	1.02602	1.02775	1.01448	1.01963	1.01767	1.01803	1.01176	1.00897	1.0032	1.00519	1.01449	1.00445	0.995135	1.00609	0.998109	0.995969	0.97618	0.997291	0.999347	1.00261	0.993738	0.995775	0.999276	0.989581	0.98469	0.99184	0.983621	0.994162	0.99536	0.986417	0.994989	0.999211	0.989683	0.995367	0.986854	1.0055
	240	1.03225	1.02788	1.02935	1.03264	1.03137	1.04126	1.02301	1.02851	1.02868	1.03455	1.02995	1.02194	1.02845	1.02964	1.01907	1.02285	1.021	1.01928	1.01779	1.01322	1.00597	1.00725	1.02152	1.00614	0.998464	1.00849	0.999674	0.997993	0.976572	0.998504	1.00058	1.00648	0.994366	0.996359	0.998884	0.991942	0.987237	0.988878	0.98613	0.996619	0.99514	0.98785	0.996259	1.0001	0.996332	0.998735	0.986767	1.00643
	260	1.03249	1.02806	1.03127	1.03602	1.03329	1.03809	1.02323	1.0232	1.0257	1.03477	1.02768	1.02063	1.02798	1.02664	1.01751	1.02173	1.01764	1.01911	1.01735	1.00932	1.00225	1.00356	1.01424	1.00258	0.992963	1.00358	0.996316	0.993487	0.972226	0.99495	0.994839	1.00284	0.990088	0.993189	0.99733	0.986645	0.981258	0.986589	0.980843	0.991065	0.994305	0.983663	0.994386	0.999153	0.994729	0.995364	0.989346	1.00963
	280	1.04033	1.03502	1.03859	1.04195	1.03944	1.04777	1.02681	1.03061	1.03153	1.03578	1.03397	1.0244	1.03102	1.03159	1.02019	1.02605	1.02235	1.02529	1.02148	1.01222	1.00693	1.00782	1.01604	1.0069	0.995902	1.00426	0.993263	0.996123	0.97323	0.995328	0.995632	1.00005	0.990633	0.992869	0.990219	0.984915	0.979044	0.981891	0.978895	0.98916	0.990068	0.980426	0.990613	0.993187	0.988881	0.995813	0.983764	1.00053
	300	1.04997	1.04527	1.05059	1.05249	1.04817	1.05323	1.03289	1.03946	1.03784	1.04361	1.03862	1.0304	1.03904	1.03683	1.02875	1.03219	1.02669	1.03133	1.02782	1.02089	1.01286	1.01394	1.02197	1.01155	1.00028	1.00973	1.00131	0.998081	0.977658	0.999098	1.00339	1.00322	0.99304	0.995119	0.997152	0.988012	0.984192	0.980625	0.980727	0.990119	0.993124	0.983747	0.993665	0.997753	0.994384	0.995316	0.985747	1.00271
	320	1.05079	1.04772	1.05186	1.05447	1.05028	1.0604	1.03909	1.04194	1.04158	1.04818	1.04439	1.03392	1.0444	1.04387	1.03182	1.04002	1.03065	1.03916	1.03511	1.0264	1.02184	1.01833	1.02892	1.01619	1.00576	1.0166	1.00649	1.00702	0.985311	1.00313	1.00665	1.00873	0.994729	0.998958	0.999582	0.991339	0.983863	0.98493	0.982824	0.992706	0.996638	0.988219	0.998873	1.00483	0.995486	1.00056	0.98709	1.00122
	340	1.05368	1.05172	1.05107	1.05154	1.05108	1.05792	1.04017	1.04112	1.04063	1.04831	1.0448	1.04004	1.04391	1.04305	1.03139	1.03975	1.03056	1.03678	1.03497	1.02899	1.02291	1.02245	1.02876	1.01537	1.00257	1.01633	1.00493	1.00375	0.983542	1.00163	1.00536	1.00442	0.991018	0.996648	0.998121	0.990881	0.982081	0.979138	0.978835	0.988211	0.992182	0.985213	0.997797	1.00071	0.996808	0.997308	0.983179	0.999216
	360	1.05418	1.0483	1.05084	1.05016	1.0487	1.05622	1.03701	1.04136	1.04181	1.04433	1.04607	1.03965	1.04361	1.04251	1.03185	1.0395	1.03234	1.03614	1.03257	1.026	1.0236	1.02132	1.02841	1.01592	1.00527	1.01572	1.00458	1.00666	0.98355	0.997702	1.00231	1.00552	0.989071	0.995454	0.996643	0.987281	0.979602	0.977004	0.975396	0.985032	0.992345	0.983049	0.995796	1.00038	0.9943	0.993954	0.979682	0.99423
	380	1.05536	1.05273	1.05269	1.05458	1.05044	1.05956	1.04012	1.0444	1.04434	1.04998	1.04991	1.04177	1.04985	1.04419	1.03169	1.03999	1.03591	1.03378	1.03354	1.02674	1.02086	1.02058	1.02771	1.01572	1.00549	1.01553	1.00486	1.00441	0.984673	0.997775	1.00341	1.00053	0.985066	0.995714	0.995748	0.984842	0.975943	0.974116	0.971428	0.978145	0.982727	0.976304	0.986657	0.991972	0.986887	0.987935	0.971497	0.989799
	400	1.04252	1.04214	1.0425	1.0444	1.04133	1.04652	1.03127	1.034	1.03338	1.04249	1.04071	1.03669	1.04248	1.03678	1.02569	1.03229	1.02613	1.0288	1.02569	1.01735	1.01569	1.01517	1.02071	1.00939	1.00211	1.0142	1.00572	1.00236	0.982623	0.997427	1.00145	0.998448	0.982474	0.993341	0.992231	0.984733	0.974178	0.972824	0.970523	0.973953	0.980061	0.973189	0.983121	0.988628	0.984473	0.984081	0.969515	0.986255
	420	1.03335	1.03493	1.03303	1.03619	1.03098	1.03549	1.02049	1.02409	1.02356	1.02974	1.03002	1.02245	1.03008	1.02595	1.0146	1.02357	1.01372	1.01494	1.01346	1.00608	1.00494	1.00449	1.01068	0.998407	0.990627	0.998756	0.995713	0.993662	0.970501	0.98611	0.988915	0.985583	0.971426	0.980534	0.978294	0.972481	0.962121	0.958992	0.957709	0.961431	0.967688	0.957899	0.967581	0.972044	0.971253	0.968709	0.95657	0.97012
	440	1.01823	1.01892	1.01927	1.02359	1.01975	1.02218	1.00876	1.01018	1.01152	1.01917	1.01553	1.0091	1.01927	1.00978	1.00139	1.00891	1.00113	1.00054	1.00013	0.992631	0.992256	0.991102	1.00106	0.983633	0.977538	0.989092	0.986604	0.983411	0.963085	0.975562	0.97723	0.976132	0.963367	0.971749	0.966855	0.961146	0.951812	0.948989	0.946318	0.950266	0.957434	0.948958	0.956029	0.958979	0.955935	0.952628	0.945944	0.9583
	460	1.00335	1.00459	1.00582	1.00816	1.00176	1.01108	0.996393	1.0001	1.00183	1.00663	1.00795	0.997649	1.00397	0.998297	0.987994	0.995115	0.987503	0.990518	0.986498	0.980581	0.982798	0.9794	0.988193	0.974634	0.965758	0.976042	0.974331	0.976081	0.952368	0.964818	0.96596	0.964866	0.954453	0.960039	0.954701	0.946673	0.939558	0.939735	0.936854	0.94073	0.942196	0.934715	0.93924	0.943718	0.941398	0.94128	0.929673	0.942558
	480	0.988378	0.987827	0.987315	0.990533	0.986745	0.992959	0.982333	0.988726	0.987774	0.993889	0.990386	0.980584	0.985165	0.981996	0.973267	0.980933	0.972437	0.974718	0.971307	0.96779	0.966705	0.972746	0.975297	0.959935	0.953942	0.967308	0.960824	0.964438	0.942425	0.957402	0.956909	0.953895	0.944649	0.951396	0.944588	0.934714	0.931232	0.932787	0.931856	0.930126	0.934461	0.925554	0.932122	0.934126	0.931182	0.931207	0.919168	0.933703
	500	0.974654	0.972704	0.973691	0.976299	0.975029	0.985157	0.974444	0.977131	0.973942	0.982808	0.979014	0.964163	0.974541	0.969937	0.960693	0.965362	0.960832	0.961738	0.959263	0.952044	0.959202	0.953529	0.961354	0.944875	0.937483	0.950896	0.948974	0.94818	0.927546	0.943702	0.943097	0.940208	0.927245	0.935019	0.926613	0.922829	0.918492	0.924002	0.916154	0.920056	0.920961	0.913599	0.918649	0.920338	0.918344	0.920904	0.906982	0.918982
	520	0.958781	0.958304	0.959956	0.962131	0.959659	0.970234	0.957724	0.962707	0.963067	0.968299	0.962809	0.95453	0.959877	0.955728	0.947271	0.954753	0.947507	0.952699	0.950053	0.941562	0.945282	0.945655	0.954226	0.938039	0.929336	0.939859	0.94161	0.939762	0.923232	0.939035	0.935254	0.932242	0.920801	0.927466	0.918015	0.914388	0.910721	0.917347	0.911351	0.911156	0.914153	0.904342	0.908638	0.909299	0.911134	0.910545	0.89829	0.907951
	540	0.946686	0.947098	0.945957	0.948631	0.945951	0.954395	0.944491	0.949244	0.94784	0.95448	0.947932	0.939863	0.947499	0.942127	0.938121	0.938708	0.933084	0.936699	0.936127	0.93072	0.932293	0.932915	0.93607	0.924766	0.919793	0.929062	0.925122	0.92639	0.906145	0.922654	0.922356	0.918925	0.908369	0.914438	0.908037	0.904196	0.898654	0.903212	0.899889	0.899727	0.904913	0.893669	0.895127	0.899256	0.898578	0.898173	0.889183	0.897644
	560	0.946938	0.939534	0.943436	0.942905	0.941078	0.95003	0.940598	0.942462	0.943141	0.947343	0.942398	0.93082	0.940266	0.936963	0.932592	0.932342	0.928083	0.92969	0.927153	0.921902	0.925235	0.924775	0.931258	0.920349	0.909348	0.920293	0.915926	0.91886	0.899838	0.917311	0.9156	0.91298	0.902725	0.906801	0.902232	0.898592	0.892301	0.899039	0.895165	0.894241	0.895598	0.887415	0.889881	0.893906	0.892211	0.891981	0.880671	0.889561
	580	0.934234	0.931259	0.932537	0.935704	0.93291	0.940548	0.931349	0.934946	0.933868	0.94162	0.940333	0.929577	0.936736	0.93467	0.929441	0.930139	0.925396	0.926121	0.926447	0.922258	0.923739	0.921373	0.927431	0.919356	0.909758	0.92025	0.916121	0.917063	0.89771	0.91294	0.9155	0.912211	0.902781	0.908368	0.902967	0.897527	0.891515	0.896554	0.894566	0.890913	0.895985	0.885515	0.889026	0.892225	0.891339	0.890397	0.881533	0.889901
	600	0.91921	0.916571	0.920111	0.917396	0.919189	0.925449	0.913701	0.918107	0.918353	0.924655	0.923587	0.913733	0.919251	0.920865	0.916742	0.918128	0.910983	0.911732	0.912793	0.91079	0.90918	0.909085	0.915881	0.906412	0.899578	0.908411	0.904293	0.905433	0.888049	0.903251	0.904796	0.904798	0.891973	0.899957	0.891793	0.888519	0.883608	0.886191	0.883184	0.884622	0.88798	0.876063	0.881576	0.884606	0.882973	0.880962	0.871853	0.879182
	620	0.914072	0.910908	0.912248	0.915349	0.90893	0.919192	0.905883	0.913444	0.911432	0.918973	0.913551	0.907481	0.914208	0.912875	0.911447	0.910557	0.905936	0.904241	0.905963	0.902027	0.904457	0.902762	0.906613	0.898136	0.893526	0.89845	0.896611	0.897699	0.882037	0.899263	0.898536	0.896037	0.886082	0.891928	0.887209	0.880757	0.872747	0.879131	0.876434	0.877247	0.880113	0.869584	0.871687	0.873183	0.872761	0.870201	0.86204	0.870063
	640	0.905119	0.899154	0.899935	0.901289	0.899391	0.907407	0.896773	0.902089	0.898373	0.905234	0.90325	0.897258	0.905452	0.905655	0.900602	0.903012	0.896183	0.896026	0.895917	0.896793	0.894643	0.894996	0.901673	0.893911	0.887937	0.892649	0.890511	0.890896	0.872692	0.889929	0.894709	0.894147	0.882451	0.887017	0.88266	0.875964	0.870757	0.874812	0.87411	0.873415	0.876733	0.865749	0.86832	0.869999	0.867514	0.866295	0.856235	0.864972
	660	0.898403	0.893929	0.900193	0.897865	0.895099	0.903633	0.891186	0.898753	0.89504	0.901274	0.898589	0.891975	0.897407	0.899177	0.894756	0.896503	0.89018	0.89173	0.889604	0.889009	0.887271	0.8879	0.894471	0.883658	0.878725	0.884935	0.880555	0.885409	0.868246	0.884008	0.884623	0.886729	0.876513	0.878978	0.876851	0.869332	0.866292	0.868634	0.866332	0.867231	0.869845	0.858769	0.861375	0.864295	0.862503	0.860832	0.852605	0.859005
	680	0.900663	0.896163	0.898375	0.899271	0.898463	0.902439	0.891823	0.898433	0.896152	0.901772	0.899477	0.889709	0.898665	0.899575	0.894474	0.897484	0.892216	0.891855	0.891252	0.888232	0.888759	0.888605	0.894077	0.885497	0.880631	0.885909	0.883102	0.888228	0.869881	0.884098	0.88766	0.885155	0.873901	0.879839	0.875443	0.870144	0.863928	0.868784	0.865032	0.866429	0.868202	0.855412	0.860408	0.860961	0.85916	0.856565	0.851144	0.85663
	700	0.89543	0.891767	0.892849	0.89403	0.889269	0.89857	0.887844	0.893643	0.890835	0.8959	0.893689	0.886324	0.89212	0.892255	0.889891	0.893139	0.891394	0.893593	0.891435	0.890128	0.887474	0.888932	0.896705	0.885929	0.882497	0.889135	0.886152	0.889941	0.874115	0.889966	0.890197	0.891835	0.881764	0.884223	0.87836	0.871545	0.869226	0.87287	0.868371	0.869955	0.871596	0.862726	0.861278	0.867091	0.863093	0.861554	0.853441	0.860833
	720	0.89348	0.889293	0.890817	0.891978	0.887765	0.896486	0.885844	0.893392	0.889245	0.894387	0.890668	0.884627	0.892286	0.889574	0.885811	0.888263	0.88799	0.888308	0.889039	0.885227	0.884862	0.883192	0.887107	0.880175	0.876243	0.885481	0.879124	0.884388	0.863548	0.884208	0.885767	0.88586	0.8743	0.874897	0.874021	0.866057	0.861216	0.866435	0.861654	0.864639	0.867903	0.855126	0.857928	0.86099	0.85895	0.85852	0.851191	0.855814
	740	0.890263	0.885395	0.886579	0.888163	0.883496	0.891299	0.883757	0.889145	0.884165	0.890332	0.886468	0.882381	0.888541	0.887449	0.883872	0.888507	0.888099	0.889463	0.888357	0.886925	0.881884	0.885657	0.890356	0.883733	0.878752	0.886604	0.88129	0.884744	0.869877	0.886388	0.88748	0.886949	0.876774	0.878481	0.876928	0.867646	0.864974	0.867507	0.862051	0.862372	0.86868	0.854352	0.858522	0.863315	0.860451	0.856787	0.84991	0.857527
	760	0.885219	0.880585	0.883245	0.884088	0.879983	0.889235	0.878119	0.884464	0.880346	0.886402	0.882167	0.87478	0.881002	0.881861	0.878503	0.878284	0.87825	0.882739	0.883372	0.880592	0.87739	0.876815	0.883513	0.876147	0.86984	0.881301	0.880375	0.881037	0.864208	0.881337	0.882719	0.882642	0.869585	0.873568	0.871463	0.861585	0.859008	0.863519	0.859111	0.862623	0.863256	0.853001	0.855707	0.859396	0.855751	0.854201	0.847591	0.856795
	780	0.87918	0.877193	0.878621	0.878523	0.87589	0.885647	0.872706	0.87616	0.87331	0.879557	0.877373	0.869141	0.877783	0.876993	0.872632	0.877134	0.876872	0.878046	0.877494	0.876173	0.872551	0.874177	0.882772	0.87342	0.86913	0.878896	0.873422	0.877253	0.86063	0.876829	0.880056	0.880178	0.868987	0.870585	0.868103	0.861037	0.854688	0.861735	0.856418	0.859268	0.86091	0.84964	0.851695	0.85602	0.854311	0.853753	0.845011	0.851269
	ratio LEFT/RIGHT	0
	0
	20	1.00228	1.0002	1.00102	1.00093	1.00105	1.00256	0.999936	1.00179	1.00141	1.00195	0.999942	0.998353	0.998166	1.00013	0.999604	0.9995	0.999204	0.997295	0.998756	0.999327	0.996852	0.997678	0.99909	0.996667	0.998169	0.997981	0.996174	0.998251	0.996562	0.998377	0.996896	0.99908	0.999066	0.998035	1.00102	0.996885	0.998227	1.00003	1.00062	1.001	1.00082	0.99699	0.997874	1.00027	0.998402	1.00111	1.00134	1.00179
	40	1.0048	1.00285	1.00408	1.00553	1.0047	1.00627	1.00447	1.00377	1.00342	1.00526	1.00247	1.00275	1.00196	1.00188	1.00052	1.00082	1.00042	0.998601	1.00034	1.00043	0.998328	0.999534	0.99914	0.997099	0.99792	0.996452	0.995892	0.999011	0.996915	0.998926	0.99769	0.99939	0.998705	0.997951	1.00173	0.996455	0.999932	1.00089	1.00172	1.00356	1.0005	0.998935	0.998427	0.999796	0.998672	1.00138	1.00346	1.00414
	60	1.01048	1.00919	1.00941	1.01193	1.0104	1.01125	1.00875	1.00922	1.00813	1.00912	1.00846	1.00878	1.00795	1.00754	1.00599	1.0043	1.00437	1.00281	1.00412	1.00369	1.00278	1.00305	1.00295	0.999315	1.00171	1.0008	0.999694	1.00178	1.00164	1.00336	1.00181	1.00583	1.00384	1.00221	1.00532	1.00179	1.00299	1.00567	1.00436	1.00771	1.00313	1.00315	1.00184	1.00325	1.00346	1.00696	1.00795	1.01062
	80	1.01373	1.0129	1.01237	1.01422	1.01486	1.01476	1.01086	1.01237	1.01045	1.01144	1.01156	1.0109	1.01117	1.00884	1.00806	1.00529	1.00637	1.00457	1.00606	1.0043	1.00503	1.00272	1.00548	1.00214	1.00266	1.00347	1.00166	1.00446	1.00449	1.00592	1.00489	1.00859	1.00784	1.00623	1.00858	1.00588	1.00847	1.00966	1.00754	1.01241	1.00829	1.00852	1.00702	1.00686	1.00884	1.0134	1.01544	1.01708
	100	1.01415	1.01291	1.01223	1.01368	1.01488	1.0149	1.01071	1.01155	1.01129	1.01074	1.01063	1.00971	1.00914	1.00778	1.00862	1.0051	1.00434	1.00449	1.00389	1.00243	1.00338	1.0011	1.00373	1.0015	1.00115	1.00308	1.00165	1.0029	1.0029	1.00542	1.00605	1.00966	1.00909	1.00804	1.00771	1.00569	1.0103	1.01155	1.01013	1.01238	1.00988	1.00943	1.00909	1.00974	1.01187	1.01719	1.01906	1.02045
	120	1.01135	1.01076	1.01162	1.01126	1.01348	1.01372	1.00965	1.00998	1.01134	1.00918	1.00847	1.00709	1.00592	1.00624	1.00624	1.00383	1.00102	1.00238	1.00103	1.00003	0.999956	0.998261	1.00048	0.999443	0.997294	0.998934	0.997759	0.999851	1.00017	1.00247	1.0038	1.00619	1.00686	1.00725	1.00496	1.00337	1.00821	1.00902	1.01145	1.01162	1.00966	1.00862	1.00776	1.00797	1.01089	1.01648	1.01962	1.01985
	140	1.00983	1.00919	1.00881	1.00905	1.01028	1.01246	1.00859	1.00855	1.01133	1.00767	1.00574	1.00605	1.00289	1.00574	1.0055	1.00304	0.998333	1.00064	0.997518	0.998414	0.998119	0.998311	0.998435	0.996404	0.99539	0.994521	0.993383	0.995878	0.996848	1.0008	1.00187	1.0042	1.00448	1.00642	1.00346	1.00252	1.00482	1.00709	1.00996	1.00968	1.00876	1.00637	1.00737	1.00726	1.00975	1.01485	1.0178	1.01879
	160	1.00718	1.00687	1.00737	1.00576	1.0085	1.00922	1.00668	1.00721	1.0098	1.00575	1.00485	1.0052	1.00214	1.00446	1.00323	1.00008	0.996802	0.998219	0.996384	0.996444	0.996751	0.996419	0.995917	0.994262	0.993	0.991631	0.98951	0.993809	0.99372	0.997973	0.999074	1.00124	1.00073	1.00199	1.00211	1.001	1.00206	1.00272	1.00666	1.008	1.00892	1.00445	1.00559	1.00625	1.00975	1.01367	1.01491	1.01755
	180	1.00509	1.00553	1.00492	1.00318	1.00733	1.00771	1.00561	1.00541	1.00801	1.00402	1.00259	1.00352	1.00166	1.00125	1.00127	0.997325	0.994545	0.995927	0.994591	0.993947	0.994946	0.994668	0.993847	0.992922	0.99116	0.989273	0.986887	0.99233	0.989851	0.995024	0.996191	0.998362	0.996418	0.995624	0.999103	0.996569	0.998216	0.999825	1.0024	1.00444	1.00607	1.00253	1.00384	1.00581	1.00802	1.01126	1.01359	1.01377
	200	1.00184	1.00272	1.00446	1.00228	1.00622	1.00588	1.00356	1.00417	1.00629	1.00336	1.00252	1.00259	1.00101	0.99946	0.99923	0.995415	0.992959	0.994114	0.993835	0.992672	0.992908	0.992115	0.991337	0.991984	0.989681	0.988552	0.987288	0.990719	0.989406	0.992446	0.993702	0.994947	0.993072	0.991468	0.994769	0.991785	0.99565	0.996243	1.00013	1.0014	1.00252	1.00076	1.00301	1.00473	1.00732	1.01039	1.01128	1.01057
	220	1.00167	1.00403	1.00475	1.00356	1.00661	1.00755	1.00409	1.00434	1.007	1.00437	1.00363	1.0023	1.00188	1.00136	1.00018	0.996402	0.994405	0.996082	0.99372	0.993556	0.993378	0.993337	0.991187	0.993753	0.991572	0.989019	0.988134	0.991493	0.991132	0.992793	0.991814	0.993177	0.992064	0.99113	0.99273	0.989813	0.993291	0.994812	0.999597	0.999406	1.00072	1.00076	1.00242	1.00409	1.00549	1.0097	1.01125	1.0073
	240	1.00369	1.00512	1.00628	1.00601	1.00794	1.01063	1.00564	1.00863	1.00934	1.00735	1.00791	1.00723	1.00458	1.0068	1.00382	0.999564	0.999547	0.99956	0.997762	0.998548	0.998039	0.998441	0.995805	0.997367	0.996159	0.993092	0.992871	0.995139	0.996086	0.995839	0.99477	0.993233	0.994634	0.995606	0.993783	0.991922	0.99614	0.995725	1.00296	1.00226	1.00365	1.00271	1.00512	1.00619	1.0082	1.01368	1.01135	1.00814
	260	0.998422	1.00009	0.999607	1.00137	1.00375	1.00659	1.00293	1.00652	1.00619	1.00647	1.00674	1.00702	1.00475	1.0071	1.00421	1.0006	1.00015	1.00017	0.997202	1.00053	0.999596	1.00119	0.998686	1.00022	0.999838	0.997207	0.996219	0.997113	0.998592	0.997269	0.996936	0.995829	0.996507	0.998086	0.997118	0.995461	0.998722	0.998602	1.00639	1.00543	1.00648	1.00547	1.00754	1.00923	1.01089	1.01594	1.01293	1.0105
	280	0.989747	0.989644	0.990388	0.991905	0.995803	0.999408	0.996436	1.00013	0.999979	1.00024	1.00017	1.00192	0.998016	0.999991	0.996882	0.995189	0.994167	0.991764	0.989872	0.993505	0.993993	0.99467	0.994575	0.994465	0.994917	0.992635	0.990912	0.990663	0.993919	0.991268	0.99102	0.991092	0.990948	0.993671	0.991532	0.99096	0.993586	0.995078	1.00227	1.00086	0.999492	1.00085	1.00365	1.00531	1.00725	1.01234	1.00843	1.00718
	300	0.983257	0.984976	0.984365	0.986131	0.991299	0.993888	0.993018	0.995361	0.996324	0.997284	0.996463	0.997249	0.994561	0.995296	0.992743	0.991534	0.990046	0.986923	0.984326	0.988858	0.98992	0.990734	0.990182	0.992566	0.990701	0.990238	0.986424	0.985471	0.989157	0.987132	0.986029	0.987939	0.987419	0.988617	0.987934	0.986412	0.989577	0.99236	0.997618	0.994781	0.992039	0.994509	0.997809	0.997855	1.00062	1.00403	1.00225	1.00324
	320	0.9862	0.989369	0.989437	0.991386	0.997015	1.00036	0.999113	0.99964	1.00057	0.99974	0.999349	0.997823	0.996877	0.997948	0.99464	0.99264	0.992459	0.987132	0.98632	0.987616	0.990927	0.99161	0.99026	0.994427	0.991372	0.989758	0.984468	0.985354	0.9872	0.986606	0.983643	0.985825	0.987438	0.987602	0.984146	0.984108	0.988375	0.992421	0.996138	0.991787	0.986998	0.991012	0.993491	0.994138	0.996532	0.999438	0.999483	1.00048
	340	0.995739	1.00009	1.00108	1.00542	1.01019	1.01321	1.01198	1.01201	1.01092	1.01182	1.01066	1.00712	1.00982	1.00932	1.00725	1.00303	1.00166	0.997736	0.998657	0.999525	1.00075	1.00315	1.00152	1.00731	1.00246	1.00026	0.994747	0.994443	0.994751	0.996434	0.993543	0.993698	0.997677	0.996647	0.992841	0.993188	0.99923	1.00243	1.00535	0.999699	0.993326	0.996509	0.997655	0.999155	1.00219	1.00354	1.00491	1.00713
	360	1.00164	1.00441	1.00752	1.01531	1.01934	1.02196	1.02088	1.01836	1.01556	1.01763	1.01661	1.01199	1.01512	1.01605	1.01394	1.00962	1.00533	1.0047	1.00721	1.00617	1.00873	1.01107	1.01082	1.01594	1.01069	1.0066	1.00274	1.00174	1.00056	1.0034	1.00009	1.00158	1.0054	1.00395	0.997428	1.00091	1.00709	1.01237	1.01302	1.00716	1.00099	1.00345	1.00497	1.00782	1.01057	1.01141	1.01343	1.01269
	380	1.00822	1.00888	1.01201	1.02208	1.0267	1.02911	1.0274	1.02374	1.02125	1.02214	1.02126	1.01717	1.02047	1.02036	1.01851	1.01412	1.00774	1.01008	1.01394	1.01385	1.0151	1.01679	1.01848	1.02248	1.01473	1.00986	1.00632	1.00506	1.00229	1.00585	1.00465	1.00754	1.01037	1.00789	1.00104	1.00359	1.01072	1.01516	1.01506	1.01023	1.00559	1.00631	1.00803	1.00931	1.01297	1.01342	1.01457	1.01521
	400	1.01004	1.00918	1.01203	1.02244	1.02855	1.0315	1.02896	1.02454	1.02317	1.02215	1.02276	1.01809	1.0199	1.02015	1.01836	1.01432	1.00896	1.01347	1.01724	1.01635	1.01864	1.02079	1.02229	1.02675	1.017	1.01212	1.00502	1.00671	1.00314	1.00583	1.00829	1.01221	1.01443	1.0101	1.00255	1.0055	1.01195	1.01668	1.01488	1.01132	1.00845	1.00928	1.01077	1.01094	1.01273	1.01364	1.0154	1.01563
	420	1.01093	1.01076	1.01299	1.02085	1.02754	1.03246	1.03003	1.02708	1.02723	1.02441	1.02598	1.0206	1.02069	1.02178	1.01897	1.01473	1.01208	1.0168	1.02199	1.02064	1.02009	1.02399	1.02487	1.03097	1.0209	1.01393	1.00329	1.00654	1.00391	1.00581	1.01184	1.01571	1.0159	1.01149	1.00595	1.00648	1.01322	1.01626	1.01398	1.01039	1.00832	1.00937	1.00965	1.01041	1.01116	1.013	1.01363	1.01576
	440	1.0079	1.00718	1.01001	1.01548	1.0228	1.02679	1.02615	1.02495	1.02275	1.02284	1.02352	1.01923	1.01805	1.01884	1.01624	1.01236	1.01121	1.01597	1.02165	1.01905	1.01751	1.02375	1.02432	1.03241	1.02307	1.01705	1.00307	1.00476	1.00478	1.00535	1.01541	1.0172	1.01587	1.01281	1.00783	1.01048	1.01589	1.01779	1.0148	1.01081	1.01052	1.01027	1.01147	1.01292	1.0127	1.01463	1.01725	1.01735
	460	1.00462	1.00449	1.00797	1.01178	1.017	1.02122	1.02205	1.02097	1.01842	1.02004	1.02112	1.01782	1.01687	1.01598	1.01378	1.00978	1.00939	1.01304	1.02085	1.01752	1.01573	1.01984	1.0237	1.0321	1.02439	1.01605	1.00497	1.00291	1.00388	1.00373	1.0134	1.01671	1.01223	1.01113	1.00734	1.01087	1.01515	1.01457	1.01073	1.00801	1.00847	1.00703	1.00891	1.01212	1.01332	1.01455	1.01743	1.01513
	480	0.999779	1.00001	1.00368	1.00716	1.00991	1.01241	1.01304	1.01304	1.01138	1.01313	1.01522	1.01427	1.01361	1.00835	1.00893	1.00598	1.00484	1.00746	1.01511	1.01245	1.00923	1.01328	1.01958	1.02798	1.02287	1.01538	1.00511	1.00226	1.00284	1.00135	1.01126	1.01349	1.01053	1.01065	1.0078	1.01099	1.01237	1.01075	1.00908	1.00575	1.00801	1.0052	1.00735	1.01165	1.01394	1.01302	1.01825	1.0142
	500	0.998107	1.00034	1.00172	1.004	1.00567	1.00693	1.00779	1.00784	1.00939	1.01041	1.01539	1.0131	1.01248	1.00679	1.00708	1.00439	1.0026	1.00494	1.01179	1.0114	1.00733	1.00964	1.0158	1.02518	1.02205	1.01391	1.00335	1.00368	1.00168	1.00017	1.00745	1.01068	1.00894	1.00807	1.0085	1.00881	1.00832	1.00566	1.00553	1.00263	1.00419	1.00305	1.00316	1.00942	1.01165	1.01017	1.01512	1.01064
	520	0.997035	0.998702	0.999955	1.00244	1.00257	1.003	1.00385	1.00543	1.0076	1.00891	1.01357	1.01286	1.00901	1.00636	1.00501	1.00434	1.00164	1.00349	1.00895	1.00935	1.00439	1.0085	1.01228	1.02019	1.01916	1.01401	1.00268	1.00593	1.00302	1.00037	1.00724	1.00964	1.00955	1.00833	1.01071	1.00737	1.00814	1.00459	1.0059	1.00252	1.00524	1.00422	1.00422	1.00939	1.01092	1.00933	1.01437	1.0117
	540	0.993803	0.996417	0.997023	1.00095	1.0009	1.00042	1.00168	1.00352	1.00562	1.0093	1.0118	1.01181	1.00774	1.00706	1.00271	1.00443	1.0019	1.00257	1.00806	1.01004	1.00473	1.00838	1.01059	1.01758	1.01835	1.0146	1.00333	1.00636	1.00334	1.001	1.00679	1.00921	1.00945	1.00846	1.01068	1.00568	1.00778	1.00435	1.00336	1.00268	1.00556	1.00501	1.00492	1.00794	1.00855	1.0079	1.01292	1.01177
	560	0.991198	0.993188	0.99638	1.00024	0.998513	0.998274	0.999717	1.00251	1.00309	1.0069	1.00629	1.00855	1.00324	1.00283	0.998296	1.0024	1.00106	1.00187	1.00592	1.00578	1.00094	1.00615	1.00878	1.01195	1.01428	1.01132	1.00322	1.00389	1.00274	1.00116	1.00513	1.00653	1.00698	1.00755	1.00713	1.0026	1.00586	1.0036	1.00027	1.00209	1.00481	1.00483	1.00436	1.00516	1.00601	1.00558	1.00938	1.00884
	580	0.989734	0.993033	0.995614	0.998848	0.997106	0.997002	0.999267	1.00322	1.00178	1.00558	1.00353	1.0058	1.00283	1.00036	0.996503	1.00193	1.00243	1.00388	1.00654	1.00519	1.00078	1.00618	1.00835	1.01102	1.01371	1.01028	1.00333	1.00419	1.00179	1.00243	1.00486	1.00472	1.0061	1.00606	1.00665	1.00274	1.00349	1.00433	1.00063	1.00216	1.00464	1.00613	1.00305	1.00265	1.00315	1.00467	1.00851	1.00781
	600	0.993754	0.995884	0.99997	1.00024	0.999466	0.999131	1.00344	1.00526	1.00313	1.00587	1.00432	1.00364	1.00222	0.999834	0.996738	1.00259	1.00334	1.00705	1.00698	1.00402	1.00087	1.00612	1.00892	1.01032	1.0111	1.00904	1.0032	1.00367	1.00028	1.00175	1.00314	1.00325	1.00433	1.0044	1.0039	1.00226	1.00215	1.00309	1.00032	1.00223	1.00469	1.00584	1.00184	1.0017	1.00268	1.00555	1.00917	1.00675
	620	0.996964	0.999355	1.00399	1.00369	1.00397	1.00303	1.00724	1.00857	1.00705	1.00966	1.00828	1.00608	1.00546	1.003	1.00039	1.00648	1.00915	1.01257	1.01231	1.0091	1.00646	1.011	1.01209	1.01266	1.01271	1.01255	1.00725	1.0083	1.00381	1.00575	1.00555	1.00472	1.00649	1.00667	1.00721	1.00635	1.00472	1.00554	1.00303	1.00454	1.0071	1.00747	1.00394	1.00384	1.00556	1.00899	1.01383	1.01091
	640	0.999375	1.00138	1.00401	1.00528	1.00626	1.00427	1.00942	1.00873	1.00902	1.01169	1.01031	1.00645	1.00691	1.00445	1.00314	1.0085	1.01219	1.01469	1.01471	1.01256	1.00981	1.01255	1.01419	1.01402	1.01457	1.01511	1.01005	1.00821	1.00544	1.00699	1.00636	1.00562	1.00619	1.00934	1.00655	1.00812	1.00585	1.00438	1.00272	1.006	1.00783	1.0076	1.00512	1.00631	1.00752	1.01027	1.01403	1.01192
	660	0.997408	0.999067	1.0014	1.00417	1.0026	1.00309	1.00697	1.00757	1.00717	1.0097	1.00784	1.00675	1.00612	1.0037	1.00391	1.00817	1.01345	1.01443	1.01512	1.01381	1.01068	1.01198	1.01406	1.01299	1.01401	1.01505	1.01045	1.0077	1.00533	1.00815	1.00581	1.00552	1.00659	1.00887	1.0077	1.00871	1.0058	1.00414	1.00246	1.00586	1.00723	1.00921	1.00476	1.00905	1.00757	1.011	1.01269	1.01317
	680	0.997238	0.997074	0.998054	1.00051	0.998986	1.00083	1.00431	1.00404	1.00431	1.0063	1.00541	1.00486	1.00573	1.00299	1.00391	1.00583	1.01054	1.00997	1.0112	1.01048	1.00897	1.00724	1.01071	1.01178	1.01087	1.01167	1.00679	1.00358	1.00019	1.00384	1.0031	1.0027	1.00332	1.00483	1.00596	1.0063	1.00236	1.00116	1.00071	1.00262	1.00478	1.00613	1.00272	1.00611	1.0045	1.00784	1.0083	1.01022
	700	0.996679	0.996581	0.999598	0.999654	0.999613	1.00064	1.00295	1.0019	1.00374	1.0047	1.00498	1.00516	1.00553	1.00458	1.00427	1.00666	1.00973	1.00853	1.01007	1.01	1.00758	1.00672	1.01114	1.00962	1.00891	1.00859	1.00586	1.00265	1.0001	1.00306	1.00239	1.00213	1.00308	1.00406	1.00649	1.006	1.00249	1.00165	1.00159	1.00221	1.00388	1.00598	1.00311	1.00565	1.00331	1.007	1.00548	1.00846
	720	0.997009	0.996047	0.998747	0.997563	1.00218	1.00025	1.00035	0.999038	1.00302	1.00462	1.00484	1.00345	1.00583	1.00454	1.00416	1.00576	1.00781	1.00656	1.00799	1.00757	1.00761	1.00449	1.00891	1.00593	1.00548	1.00575	1.00482	1.00119	0.999377	1.0004	1.00225	1.00195	1.00176	1.00487	1.0058	1.0067	1.00316	1.00258	1.00368	1.00427	1.00374	1.00664	1.00571	1.00398	1.00386	1.00741	1.00555	1.00802
	740	0.995416	0.995933	0.998472	0.997194	1.00185	0.998882	0.998146	0.997046	1.00152	1.00341	1.00318	1.00323	1.00419	1.00353	1.00262	1.00766	1.00898	1.00712	1.00677	1.00689	1.00692	1.00558	1.00988	1.0041	1.00611	1.00456	1.00375	1.00008	1.00011	1.00072	1.00246	1.00326	1.0032	1.00693	1.00559	1.00658	1.00303	1.00309	1.00416	1.00504	1.00443	1.00917	1.00722	1.00542	1.00361	1.00843	1.00562	1.00668
	760	0.99266	0.992749	0.994797	0.994739	0.998025	0.995232	0.993307	0.995743	0.997982	0.999975	0.999369	0.999849	0.999656	0.999609	0.999864	1.00368	1.00465	1.00267	1.0014	1.0023	1.00296	1.00132	1.00324	0.999559	0.999945	1.00131	0.999566	0.99618	0.995575	0.997196	0.999092	1.0005	1.00108	1.00403	1.00306	1.00401	1.00175	1.00149	1.00152	1.00356	1.00386	1.00747	1.00654	1.00389	1.00342	1.00565	1.00553	1.00609
	780
	800
[truncated: 551 more columns]

## Sheet: 5g
Experiment date	penetrate	Col0-109	Col0-119	Col0-139		aux1-109	aux1-119	aux1-139		afb1-3_109	afb1-3_119	afb1-3_139		cngc14-1_109	cngc14-1_119	cngc14-1_139
	YES	2	7	8						0	3	9		0	1	3
	NO	7	1	0						6	6	0		6	4	2
12/3/2021	%of penetrated	22.2222	87.5	100		NA	NA	NA		0	33.3333	100		0	20	60
	YES	0	9	6						0	3	4		0	1	1
	NO	12	4	4						10	8	7		7	9	10
12/14/2021	%of penetrated	0	69.2308	60		NA	NA	NA		0	27.2727	36.3636		0	10	9.09091
	YES	11	10	12						9	6	12		4	6	9
	NO	1	1	0						3	6	0		5	5	0
12/23/2021	%of penetrated	91.6667	90.9091	100		NA	NA	NA		75	50	100		44.4444	54.5455	100
	YES	1	7	7		0	0	0		0	6	9		0		4
	NO	9	5	2		6	7	7		9	5	0		3		0
1/10/2022	%of penetrated	10	58.3333	77.7778		0	0	0		0	54.5455	100		0	NA	100
	YES	6	13	15		0	0	0		3	8	10		3	4	7
	NO	6	2	0		10	14	13		11	7	6		6	4	3
1/20/2022	%of penetrated	50	86.6667	100		0	0	0		21.4286	53.3333	62.5		33.3333	50	70
	YES	3	8	8		0	0	0		1	1	5		1	1	4
	NO	7	3	4		8	8	7		14	13	9		15	13	11
2/17/2022	%of penetrated	30	72.7273	66.6667		0	0	0		6.66667	7.14286	35.7143		6.25	7.14286	26.6667
	YES	3	6	21		0	0	1		1	4	9		0	5	10
	NO	13	8	1		20	22	14		12	18	13		16	7	5
3/25/2022	%of penetrated	18.75	42.8571	95.4545		0	0	6.66667		7.69231	18.1818	40.9091		0	41.6667	66.6667
