# Supplementary material for: The AUX1-AFB1-CNGC14 module establishes a longitudinal root surface pH profile
Source: eLife. 2023 Jul 14;12:e85193. doi: 10.7554/eLife.85193 (PMC10414970; doi:10.7554/eLife.85193)
Supplement: Source data 1. [file elife-85193-data1.xlsx]

## Sheet: Figure_1_d
> library(nparcomp)
> a=nparcomp(growth[,2]~growth[,1],data=growth,type = "Tukey")
#------Nonparametric Multiple Comparisons for relative contrast effects-----#
- Alternative Hypothesis: True relative contrast effect p is not equal to 1/2
- Type of Contrast : Tukey
- Confidence level: 95 %
- Method = Logit - Transformation
- Estimation Method: Pairwise rankings
#---------------------------Interpretation----------------------------------#
p(a,b) > 1/2 : b tends to be larger than a
#---------------------------------------------------------------------------#
> summary(a)
#------------Nonparametric Multiple Comparisons for relative contrast effects----------#
- Alternative Hypothesis: True relative contrast effect p is not equal to 1/2
- Estimation Method: Global Pseudo ranks
- Type of Contrast : Tukey
- Confidence Level: 95 %
- Method = Logit - Transformation
- Estimation Method: Pairwise rankings
#---------------------------Interpretation--------------------------------------------#
p(a,b) > 1/2 : b tends to be larger than a
#-------------------------------------------------------------------------------------#
#----Data Info-------------------------------------------------------------------------#
Sample Size
1 pH 3.83 9
2 pH 4.38 9
3 pH 4.84 9
4 pH 5.28 9
5 pH 5.75 8
6 pH 6.52 9
#----Contrast--------------------------------------------------------------------------#
pH 3.83 pH 4.38 pH 4.84 pH 5.28 pH 5.75 pH 6.52
pH 4.38 - pH 3.83 -1 1 0 0 0 0
pH 4.84 - pH 3.83 -1 0 1 0 0 0
pH 5.28 - pH 3.83 -1 0 0 1 0 0
pH 5.75 - pH 3.83 -1 0 0 0 1 0
pH 6.52 - pH 3.83 -1 0 0 0 0 1
pH 4.84 - pH 4.38 0 -1 1 0 0 0
pH 5.28 - pH 4.38 0 -1 0 1 0 0
pH 5.75 - pH 4.38 0 -1 0 0 1 0
pH 6.52 - pH 4.38 0 -1 0 0 0 1
pH 5.28 - pH 4.84 0 0 -1 1 0 0
pH 5.75 - pH 4.84 0 0 -1 0 1 0
pH 6.52 - pH 4.84 0 0 -1 0 0 1
pH 5.75 - pH 5.28 0 0 0 -1 1 0
pH 6.52 - pH 5.28 0 0 0 -1 0 1
pH 6.52 - pH 5.75 0 0 0 0 -1 1
#----Analysis--------------------------------------------------------------------------#
Comparison Estimator Lower Upper Statistic p.Value
1 p( pH 3.83 , pH 4.38 ) 0.999 0.996 1 15.88464 0
2 p( pH 3.83 , pH 4.84 ) 0.999 0.996 1 15.88464 0
3 p( pH 3.83 , pH 5.28 ) 0.999 0.996 1 15.88464 0
4 p( pH 3.83 , pH 5.75 ) 0.999 0.996 1 15.88464 0
5 p( pH 3.83 , pH 6.52 ) 0.999 0.996 1 15.88464 0
6 p( pH 4.38 , pH 4.84 ) 0.999 0.996 1 15.88464 0
7 p( pH 4.38 , pH 5.28 ) 0.999 0.996 1 15.88464 0
8 p( pH 4.38 , pH 5.75 ) 0.999 0.996 1 15.88464 0
9 p( pH 4.38 , pH 6.52 ) 0.999 0.996 1 15.88464 0
10 p( pH 4.84 , pH 5.28 ) 0.999 0.996 1 15.88464 0
11 p( pH 4.84 , pH 5.75 ) 0.999 0.996 1 15.88464 0
12 p( pH 4.84 , pH 6.52 ) 0.999 0.996 1 15.88464 0
13 p( pH 5.28 , pH 5.75 ) 0.999 0.996 1 15.88464 0
14 p( pH 5.28 , pH 6.52 ) 0.999 0.996 1 15.88464 0
15 p( pH 5.75 , pH 6.52 ) 0.999 0.996 1 15.88464 0
#----Overall---------------------------------------------------------------------------#
Quantile p.Value
1 2.927617 0
#--------------------------------------------------------------------------------------#
>
>
> aa <- a$connames
> library(stringr)
> library(rcompanion)
> ii=1
> aa2=vector()
> for (i in aa){
+ i=str_remove_all(i, "[p( ]")
+ i=str_remove_all(i, "[)]")
+ i=str_replace_all(i,","," - ")
+ i=str_replace_all(i,"_","")
+ aa2[ii]=i
#NAME?
+ }
> pv <- a$Analysis$p.Value
> cldList(comparison=aa2,p.value=pv)
Group Letter MonoLetter
1 H3.83 a a
2 H4.38 b b
3 H4.84 c c
4 H5.28 d d
5 H5.75 e e
6 H6.52 f f

## Sheet: Figure1_S1_e
> #20200722-chemicals_ion
> growth <- read.delim("/home/adminelson/Documents/Old postdoc stuff/fig1/boxplots_medium/Raw data/chemicals_ion", stringsAsFactors=TRUE,header = F)
> print(levels(growth[,1]))
[1] "cacl2" "control" "dtt" "h2o2" "kcl"
> order=c("control","h2o2","dtt","cacl2","kcl")
> growth[,1]<-factor(growth[,1],levels=order)
>
> boxplot(growth[,2]~growth[,1],ylim=c(0,10),cex.lab=1.5, cex.axis=1.5,
+ cex.main=1.5, cex.sub=1.5,las=1,xlab="",ylab="",frame=F,col=colors)
> stripchart(growth[,2]~growth[,1], vertical = TRUE, data = growth, add = TRUE,
+ pch = 20, col = "grey",method = "jitter",cex=1.5)
> library(nparcomp)
> a=nparcomp(growth[,2]~growth[,1],data=growth,type = "Tukey")
#------Nonparametric Multiple Comparisons for relative contrast effects-----#
- Alternative Hypothesis: True relative contrast effect p is not equal to 1/2
- Type of Contrast : Tukey
- Confidence level: 95 %
- Method = Logit - Transformation
- Estimation Method: Pairwise rankings
#---------------------------Interpretation----------------------------------#
p(a,b) > 1/2 : b tends to be larger than a
#---------------------------------------------------------------------------#
> summary(a)
#------------Nonparametric Multiple Comparisons for relative contrast effects----------#
- Alternative Hypothesis: True relative contrast effect p is not equal to 1/2
- Estimation Method: Global Pseudo ranks
- Type of Contrast : Tukey
- Confidence Level: 95 %
- Method = Logit - Transformation
- Estimation Method: Pairwise rankings
#---------------------------Interpretation--------------------------------------------#
p(a,b) > 1/2 : b tends to be larger than a
#-------------------------------------------------------------------------------------#
#----Data Info-------------------------------------------------------------------------#
Sample Size
1 control 9
2 h2o2 9
3 dtt 9
4 cacl2 9
5 kcl 9
#----Contrast--------------------------------------------------------------------------#
control h2o2 dtt cacl2 kcl
h2o2 - control -1 1 0 0 0
dtt - control -1 0 1 0 0
cacl2 - control -1 0 0 1 0
kcl - control -1 0 0 0 1
dtt - h2o2 0 -1 1 0 0
cacl2 - h2o2 0 -1 0 1 0
kcl - h2o2 0 -1 0 0 1
cacl2 - dtt 0 0 -1 1 0
kcl - dtt 0 0 -1 0 1
kcl - cacl2 0 0 0 -1 1
#----Analysis--------------------------------------------------------------------------#
Comparison Estimator Lower Upper Statistic p.Value
1 p( control , h2o2 ) 0.395 0.109 0.777 -0.708577 0.9975536
2 p( control , dtt ) 0.802 0.333 0.971 1.861350 0.4538870
3 p( control , cacl2 ) 0.999 0.996 1.000 14.636788 0.0000000
4 p( control , kcl ) 0.999 0.996 1.000 14.636788 0.0000000
5 p( h2o2 , dtt ) 0.827 0.309 0.981 1.838500 0.4715559
6 p( h2o2 , cacl2 ) 0.999 0.996 1.000 14.636788 0.0000000
7 p( h2o2 , kcl ) 0.999 0.996 1.000 14.636788 0.0000000
8 p( dtt , cacl2 ) 0.999 0.996 1.000 14.636788 0.0000000
9 p( dtt , kcl ) 0.999 0.996 1.000 14.636788 0.0000000
10 p( cacl2 , kcl ) 0.999 0.996 1.000 14.636788 0.0000000
#----Overall---------------------------------------------------------------------------#
Quantile p.Value
1 2.784078 0
#--------------------------------------------------------------------------------------#
>
>
> aa <- a$connames
> library(stringr)
> library(rcompanion)
> ii=1
> aa2=vector()
> for (i in aa){
+ i=str_remove_all(i, "[p( ]")
+ i=str_remove_all(i, "[)]")
+ i=str_replace_all(i,","," - ")
+ i=str_replace_all(i,"_","")
+ aa2[ii]=i
#NAME?
+ }
> pv <- a$Analysis$p.Value
> cldList(comparison=aa2,p.value=pv)
Group Letter MonoLetter
1 control a a
2 h2o2 a a
3 dtt a a
4 cacl2 b b
5 kcl c c

## Sheet: Figure_2_b
listd	listp	liststars
X0	0	*
X20	0	*
X40	0	*
X60	0	*
X80	0	*
X100	0	*
X120	0	*
X140	0	*
X160	0	*
X180	0	*
X200	0	*
X220	0	*
X240	0	*
X260	0	*
X280	0	*
X300	0	*
X320	0.006	*
X340	0.036	*
X360	0.227	NS
X380	0.253	NS
X400	0.406	NS
X420	0.53	NS
X440	0.575	NS
X460	0.583	NS
X480	0.464	NS
X500	0.368	NS
X520	0.24	NS
X540	0.23	NS
X560	0.109	NS
X580	0.125	NS
X600	0.094	NS
X620	0.049	*
X640	0.041	*
X660	0.007	*
X680	0.003	*
X700	0.001	*
X720	0	*
X740	0	*
X760	0	*
X780	0	*
X800	0	*

## Sheet: Figure_2_c
listd	listp_aha	liststars_aha	listp_pp2c	liststars_pp2c
X0	0.000270423	*	0.0157639	*
X20	0.000581009	*	0.0011309	*
X40	0.00680816	*	0.000478545	*
X60	0.00222467	*	0.000245595	*
X80	0.00593344	*	0.000240659	*
X100	0.0106293	*	0.000480891	*
X120	0.00762239	*	0.000228263	*
X140	0.0102808	*	0.000531196	*
X160	0.00469151	*	0.000241697	*
X180	0.00557531	*	0.000788538	*
X200	0.00353512	*	0.00172913	*
X220	0.0038321	*	0.00179779	*
X240	0.00177927	*	0.0491645	*
X260	0.00176943	*	0.124672	NS
X280	0.00145536	*	0.410093	NS
X300	0.0015695	*	0.738808	NS
X320	0.00111918	*	0.998444	NS
X340	0.00209915	*	0.878775	NS
X360	0.00655964	*	0.615283	NS
X380	0.024406	*	0.549344	NS
X400	0.0696377	NS	0.253393	NS
X420	0.086985	NS	0.153987	NS
X440	0.1443	NS	0.103149	NS
X460	0.316992	NS	0.148103	NS
X480	0.381112	NS	0.211696	NS
X500	0.509104	NS	0.251149	NS
X520	0.651591	NS	0.263218	NS
X540	0.773225	NS	0.325812	NS
X560	0.783941	NS	0.366903	NS
X580	0.657388	NS	0.417144	NS
X600	0.748014	NS	0.474001	NS
X620	0.778434	NS	0.735133	NS
X640	0.640054	NS	0.79452	NS
X660	0.61425	NS	0.998403	NS
X680	0.509377	NS	0.935551	NS
X700	0.630962	NS	0.553052	NS
X720	0.496996	NS	0.400805	NS
X740	0.514899	NS	0.272192	NS
X760	0.30027	NS	0.21695	NS
X780	0.130239	NS	0.0627363	NS
X800	0.114754	NS	0.0335918	*

## Sheet: Figure2_S2_a
a=npar.t.test(growth[	3]~growth[	1]	data=growth)
#------Nonparametric Test Procedures and Confidence Intervals for relative effects-----#
- Alternative Hypothesis: True relative effect p is less or equal than 1/2
- Confidence level: 95 %
- Method = Logit - Transformation
#---------------------------Interpretation----------------------------------#
p(a	b) > 1/2 : b tends to be larger than a
#---------------------------------------------------------------------------#
> summary(a)
#-----Nonparametric Test Procedures and Confidence Intervals for relative effects-----#
- Alternative Hypothesis: True relative effect p is less or equal than 1/2
- Confidence level: 95 %
- Method = Logit - Transformation
#---------------------------Interpretation---------------------------------------------#
p(a	b) > 1/2 : b tends to be larger than a
#--------------------------------------------------------------------------------------#
#----Data Info-------------------------------------------------------------------------#
Sample Size
cm cm 34
fc fc 39
#----Analysis--------------------------------------------------------------------------#
Effect Estimator Lower Upper T p.Value
1 p(cm	fc) 0.991 0.963 0.998 6.4 0

## Sheet: Figure2_S_b
> a=nparcomp(growth[	3]~growth[	1]	data=R	type = "Tukey")
#------Nonparametric Multiple Comparisons for relative contrast effects-----#
- Alternative Hypothesis: True relative contrast effect p is not equal to 1/2
- Type of Contrast : Tukey
- Confidence level: 95 %
- Method = Logit - Transformation
- Estimation Method: Pairwise rankings
#---------------------------Interpretation----------------------------------#
p(a	b) > 1/2 : b tends to be larger than a
#---------------------------------------------------------------------------#
> summary(a)
#------------Nonparametric Multiple Comparisons for relative contrast effects----------#
- Alternative Hypothesis: True relative contrast effect p is not equal to 1/2
- Estimation Method: Global Pseudo ranks
- Type of Contrast : Tukey
- Confidence Level: 95 %
- Method = Logit - Transformation
- Estimation Method: Pairwise rankings
#---------------------------Interpretation--------------------------------------------#
p(a	b) > 1/2 : b tends to be larger than a
#-------------------------------------------------------------------------------------#
#----Data Info-------------------------------------------------------------------------#
Sample Size
1 col_cm 20
2 col_iaa 20
3 aha_cm 19
4 aha_iaa 19
5 pp2c_cm 10
6 pp2c_iaa 16
#----Contrast--------------------------------------------------------------------------#
col_cm col_iaa aha_cm aha_iaa pp2c_cm pp2c_iaa
col_iaa - col_cm -1 1 0 0 0 0
aha_cm - col_cm -1 0 1 0 0 0
aha_iaa - col_cm -1 0 0 1 0 0
pp2c_cm - col_cm -1 0 0 0 1 0
pp2c_iaa - col_cm -1 0 0 0 0 1
aha_cm - col_iaa 0 -1 1 0 0 0
aha_iaa - col_iaa 0 -1 0 1 0 0
pp2c_cm - col_iaa 0 -1 0 0 1 0
pp2c_iaa - col_iaa 0 -1 0 0 0 1
aha_iaa - aha_cm 0 0 -1 1 0 0
pp2c_cm - aha_cm 0 0 -1 0 1 0
pp2c_iaa - aha_cm 0 0 -1 0 0 1
pp2c_cm - aha_iaa 0 0 0 -1 1 0
pp2c_iaa - aha_iaa 0 0 0 -1 0 1
pp2c_iaa - pp2c_cm 0 0 0 0 -1 1
#----Analysis--------------------------------------------------------------------------#
Comparison Estimator Lower Upper Statistic p.Value
1 p( col_cm	col_iaa ) 0.017 0.002 0.164 -4.841621 0.0000282779
2 p( col_cm	aha_cm ) 0.742 0.451 0.910 2.435620 0.1703822739
3 p( col_cm	aha_iaa ) 0.395 0.175 0.667 -1.100897 0.9670580384
4 p( col_cm	pp2c_cm ) 0.260 0.067 0.631 -1.908318 0.4912768763
5 p( col_cm	pp2c_iaa ) 0.001 0.000 0.002 -22.251341 0.0000000000
6 p( col_iaa	aha_cm ) 0.982 0.771 0.999 4.154804 0.0004248237
7 p( col_iaa	aha_iaa ) 0.897 0.581 0.982 3.393307 0.0093936574
8 p( col_iaa	pp2c_cm ) 0.820 0.426 0.966 2.409181 0.1825058567
9 p( col_iaa	pp2c_iaa ) 0.038 0.005 0.245 -4.419879 0.0001846290
10 p( aha_cm	aha_iaa ) 0.197 0.061 0.481 -3.046915 0.0306404964
11 p( aha_cm	pp2c_cm ) 0.126 0.026 0.440 -3.297612 0.0134434787
12 p( aha_cm	pp2c_iaa ) 0.001 0.000 0.002 -22.251341 0.0000000000
13 p( aha_iaa	pp2c_cm ) 0.363 0.121 0.702 -1.142807 0.9575154860
14 p( aha_iaa	pp2c_iaa ) 0.023 0.001 0.338 -3.514019 0.0059481893
15 p( pp2c_cm	pp2c_iaa ) 0.019 0.001 0.350 -3.420641 0.0088968872
#----Overall---------------------------------------------------------------------------#
Quantile p.Value
1 2.884764 0
#--------------------------------------------------------------------------------------#
>
>
> aa <- a$connames
> library(stringr)
> library(rcompanion)
> ii=1
> aa2=vector()
> for (i in aa){
+ i=str_remove_all(i	[p( ]") + i=str_remove_all(i, "[)]") + i=str_replace_all(i,	," - ") + i=str_replace_all(i,"_	") + aa2[ii]=i + ii=ii+1 + } > pv <- a$Analysis$p.Value > cldList(comparison=aa2,p.value=pv) Group Letter MonoLetter 1 colcm ab ab 2 coliaa c c 3 ahacm a a 4 ahaiaa b b 5 2ccm bc bc 6 2ciaa d d

## Sheet: Figure2_S2_d
col0				aha				pp2c
listd	listp	liststars	listdelta	listd	listp	liststars	listdelta	listd	listp	liststars	listdelta
X0	0	*	0.0338395	X0	0.005	*	0.0250908	X0	0.007	*	0.0215842
X20	0	*	0.0346303	X20	0.01	*	0.0269089	X20	0.007	*	0.0228258
X40	0	*	0.0370871	X40	0.022	*	0.0277509	X40	0.003	*	0.0286049
X60	0	*	0.0398407	X60	0.014	*	0.0312139	X60	0.005	*	0.0329133
X80	0	*	0.04548	X80	0.021	*	0.0323808	X80	0.003	*	0.0371251
X100	0	*	0.050658	X100	0.023	*	0.0352883	X100	0.001	*	0.0459303
X120	0	*	0.0561309	X120	0.024	*	0.0388726	X120	0.001	*	0.0506797
X140	0	*	0.0602936	X140	0.02	*	0.0423688	X140	0.001	*	0.0570749
X160	0	*	0.0651959	X160	0.013	*	0.0455873	X160	0	*	0.0617597
X180	0	*	0.0704809	X180	0.006	*	0.0510844	X180	0	*	0.070065
X200	0	*	0.0759753	X200	0.004	*	0.0535485	X200	0	*	0.0765723
X220	0	*	0.0809465	X220	0.002	*	0.0572556	X220	0.002	*	0.0819219
X240	0	*	0.0853228	X240	0.001	*	0.0622408	X240	0.002	*	0.0888777
X260	0	*	0.0942353	X260	0	*	0.0673767	X260	0.001	*	0.0969086
X280	0	*	0.101851	X280	0	*	0.0706123	X280	0	*	0.101144
X300	0	*	0.111154	X300	0	*	0.0773682	X300	0	*	0.103904
X320	0	*	0.118012	X320	0	*	0.0836073	X320	0	*	0.10548
X340	0	*	0.121493	X340	0	*	0.0912151	X340	0	*	0.105092
X360	0	*	0.125892	X360	0	*	0.0980859	X360	0	*	0.103808
X380	0	*	0.129461	X380	0	*	0.104434	X380	0.001	*	0.0993784
X400	0	*	0.12882	X400	0	*	0.107104	X400	0.001	*	0.0929556
X420	0	*	0.126317	X420	0	*	0.112195	X420	0	*	0.0892992
X440	0	*	0.122531	X440	0	*	0.115973	X440	0	*	0.0862417
X460	0	*	0.116123	X460	0	*	0.118024	X460	0	*	0.0816171
X480	0	*	0.111877	X480	0	*	0.116821	X480	0	*	0.0793625
X500	0	*	0.106079	X500	0	*	0.115685	X500	0	*	0.0761525
X520	0	*	0.0991438	X520	0	*	0.113398	X520	0	*	0.0735832
X540	0	*	0.0955788	X540	0	*	0.109396	X540	0	*	0.0726426
X560	0	*	0.0917221	X560	0	*	0.105606	X560	0	*	0.07078
X580	0	*	0.0874376	X580	0	*	0.100837	X580	0	*	0.0679214
X600	0	*	0.0855561	X600	0	*	0.0983499	X600	0.001	*	0.0680623
X620	0	*	0.0849294	X620	0	*	0.0955387	X620	0.001	*	0.0669143
X640	0	*	0.0829748	X640	0	*	0.0921998	X640	0	*	0.0658207
X660	0	*	0.0806741	X660	0	*	0.089452	X660	0.001	*	0.0648015
X680	0	*	0.0787614	X680	0	*	0.0867327	X680	0.001	*	0.063373
X700	0	*	0.0783093	X700	0	*	0.0831368	X700	0.001	*	0.0621489
X720	0	*	0.0763957	X720	0	*	0.0807205	X720	0	*	0.0634063
X740	0	*	0.0766403	X740	0	*	0.0772557	X740	0.001	*	0.0635417
X760	0	*	NA	X760	0	*	0.076625	X760	0	*	0.0624158
X780	0	*	NA	X780	0	*	0.076267	X780	0	*	0.0613292
X800	0	*	NA	X800	0	*	0.0746792	X800	0	*	0.0615932

## Sheet: Figure2_S2_e
listd	listp_aha	liststars_aha	listp_pp2c	liststars_pp2c
X0	0.531278	NS	0.169611	NS
X20	0.686507	NS	0.184098	NS
X40	0.64434	NS	0.358286	NS
X60	0.742583	NS	0.396089	NS
X80	0.370926	NS	0.523698	NS
X100	0.404966	NS	0.683763	NS
X120	0.471926	NS	0.845154	NS
X140	0.550993	NS	0.908938	NS
X160	0.419392	NS	0.85402	NS
X180	0.479584	NS	0.932878	NS
X200	0.32349	NS	0.995144	NS
X220	0.287928	NS	0.998785	NS
X240	0.264775	NS	0.934549	NS
X260	0.208235	NS	0.935741	NS
X280	0.124645	NS	0.972426	NS
X300	0.100526	NS	0.851155	NS
X320	0.0847765	NS	0.755761	NS
X340	0.128787	NS	0.568954	NS
X360	0.187966	NS	0.443437	NS
X380	0.226331	NS	0.217752	NS
X400	0.269406	NS	0.0793715	NS
X420	0.419564	NS	0.0679905	NS
X440	0.666746	NS	0.0671851	NS
X460	0.980167	NS	0.0850201	NS
X480	0.994055	NS	0.0789892	NS
X500	0.868062	NS	0.0906124	NS
X520	0.708588	NS	0.159086	NS
X540	0.634547	NS	0.164272	NS
X560	0.758941	NS	0.190312	NS
X580	0.705584	NS	0.175965	NS
X600	0.709085	NS	0.187004	NS
X620	0.843011	NS	0.166114	NS
X640	0.853558	NS	0.183296	NS
X660	0.808087	NS	0.258447	NS
X680	0.812703	NS	0.235657	NS
X700	0.943145	NS	0.226969	NS
X720	0.939623	NS	0.322436	NS
X740	0.99862	NS	0.335824	NS
X760	0.997609	NS	0.47781	NS
X780	0.994536	NS	0.277925	NS
X800	0.999409	NS	0.285587	NS

## Sheet: Figure2_S2_f
listd	listp_aha	liststars_aha	listp_pp2c	liststars_pp2c
X0	0.0214815	*	0.000134784	*
X20	0.0435948	*	0.00012204	*
X40	0.0189928	*	0.000150565	*
X60	0.0454579	*	0.000166181	*
X80	0.0742949	NS	0.00042992	*
X100	0.0770041	NS	0.000414648	*
X120	0.17213	NS	0.00104184	*
X140	0.14902	NS	0.00102096	*
X160	0.0977704	NS	0.00277557	*
X180	0.256671	NS	0.00438495	*
X200	0.504582	NS	0.00514647	*
X220	0.541908	NS	0.00429866	*
X240	0.429855	NS	0.00281281	*
X260	0.30237	NS	0.00319433	*
X280	0.148221	NS	0.00783725	*
X300	0.0616253	NS	0.0251531	*
X320	0.0515724	NS	0.0637216	NS
X340	0.0203526	*	0.190008	NS
X360	0.0145865	*	0.514479	NS
X380	0.00343275	*	0.810602	NS
X400	0.00216735	*	0.987531	NS
X420	0.00295139	*	0.916872	NS
X440	0.00232399	*	0.643168	NS
X460	0.00582541	*	0.411774	NS
X480	0.0103387	*	0.39598	NS
X500	0.0187885	*	0.309905	NS
X520	0.0394386	*	0.18022	NS
X540	0.0808162	NS	0.119257	NS
X560	0.0991607	NS	0.0796567	NS
X580	0.222673	NS	0.0963084	NS
X600	0.388268	NS	0.101506	NS
X620	0.639497	NS	0.103581	NS
X640	0.887701	NS	0.0951278	NS
X660	0.995032	NS	0.11725	NS
X680	0.835022	NS	0.12637	NS
X700	0.531742	NS	0.21909	NS
X720	0.152617	NS	0.274463	NS
X740	0.0391104	*	0.209389	NS
X760	0.0121709	*	0.259647	NS
X780	0.00728816	*	0.262445	NS
X800	0.00107416	*	0.256473	NS

## Sheet: Figure2_S2_g
a=nparcomp(growth[	4]~growth[	2]	data=R	type = "Tukey")
#------Nonparametric Multiple Comparisons for relative contrast effects-----#
- Alternative Hypothesis: True relative contrast effect p is not equal to 1/2
- Type of Contrast : Tukey
- Confidence level: 95 %
- Method = Logit - Transformation
- Estimation Method: Pairwise rankings
#---------------------------Interpretation----------------------------------#
p(a	b) > 1/2 : b tends to be larger than a
#---------------------------------------------------------------------------#
> summary(a)
#------------Nonparametric Multiple Comparisons for relative contrast effects----------#
- Alternative Hypothesis: True relative contrast effect p is not equal to 1/2
- Estimation Method: Global Pseudo ranks
- Type of Contrast : Tukey
- Confidence Level: 95 %
- Method = Logit - Transformation
- Estimation Method: Pairwise rankings
#---------------------------Interpretation--------------------------------------------#
p(a	b) > 1/2 : b tends to be larger than a
#-------------------------------------------------------------------------------------#
#----Data Info-------------------------------------------------------------------------#
Sample Size
1 col_cm 17
2 col_iaa 25
3 aha_cm 20
4 aha_iaa 21
5 pp2c_cm 39
6 pp2c_iaa 39
#----Contrast--------------------------------------------------------------------------#
col_cm col_iaa aha_cm aha_iaa pp2c_cm pp2c_iaa
col_iaa - col_cm -1 1 0 0 0 0
aha_cm - col_cm -1 0 1 0 0 0
aha_iaa - col_cm -1 0 0 1 0 0
pp2c_cm - col_cm -1 0 0 0 1 0
pp2c_iaa - col_cm -1 0 0 0 0 1
aha_cm - col_iaa 0 -1 1 0 0 0
aha_iaa - col_iaa 0 -1 0 1 0 0
pp2c_cm - col_iaa 0 -1 0 0 1 0
pp2c_iaa - col_iaa 0 -1 0 0 0 1
aha_iaa - aha_cm 0 0 -1 1 0 0
pp2c_cm - aha_cm 0 0 -1 0 1 0
pp2c_iaa - aha_cm 0 0 -1 0 0 1
pp2c_cm - aha_iaa 0 0 0 -1 1 0
pp2c_iaa - aha_iaa 0 0 0 -1 0 1
pp2c_iaa - pp2c_cm 0 0 0 0 -1 1
#----Analysis--------------------------------------------------------------------------#
Comparison Estimator Lower Upper Statistic p.Value
1 p( col_cm	col_iaa ) 0.042 0.005 0.262 -4.266932 2.200795e-04
2 p( col_cm	aha_cm ) 0.112 0.024 0.392 -3.617681 3.884090e-03
3 p( col_cm	aha_iaa ) 0.045 0.005 0.299 -3.957169 9.950091e-04
4 p( col_cm	pp2c_cm ) 0.673 0.441 0.843 2.143765 2.840376e-01
5 p( col_cm	pp2c_iaa ) 0.157 0.058 0.360 -4.337170 1.841915e-04
6 p( col_iaa	aha_cm ) 0.622 0.368 0.823 1.367186 8.111647e-01
7 p( col_iaa	aha_iaa ) 0.215 0.070 0.498 -2.871115 4.685596e-02
8 p( col_iaa	pp2c_cm ) 0.915 0.746 0.975 5.217733 2.739626e-06
9 p( col_iaa	pp2c_iaa ) 0.693 0.477 0.849 2.558762 1.118303e-01
10 p( aha_cm	aha_iaa ) 0.136 0.032 0.431 -3.357058 1.035873e-02
11 p( aha_cm	pp2c_cm ) 0.886 0.695 0.964 4.774299 4.596383e-05
12 p( aha_cm	pp2c_iaa ) 0.606 0.375 0.798 1.308637 8.446328e-01
13 p( aha_iaa	pp2c_cm ) 0.971 0.851 0.995 5.678838 1.046206e-07
14 p( aha_iaa	pp2c_iaa ) 0.847 0.586 0.956 3.580529 4.931215e-03
15 p( pp2c_cm	pp2c_iaa ) 0.154 0.062 0.333 -4.813144 2.431920e-05
#----Overall---------------------------------------------------------------------------#
Quantile p.Value
1 2.853059 1.046206e-07
#--------------------------------------------------------------------------------------#
> aa <- a$connames
> library(stringr)
Attachement du package : ‘stringr’
The following object is masked _by_ ‘.GlobalEnv’:
words
> library(rcompanion)
> ii=1
> aa2=vector()
> for (i in aa){
+ i=str_remove_all(i	[p( ]") + i=str_remove_all(i, "[)]") + i=str_replace_all(i,	," - ") + i=str_replace_all(i,"_	") + aa2[ii]=i + ii=ii+1 + } > pv <- a$Analysis$p.Value > cldList(comparison=aa2,p.value=pv) Group Letter MonoLetter 1 colcm a a 2 coliaa b b 3 ahacm b b 4 ahaiaa c c 5 2ccm a a 6 2ciaa b b

[truncated: 29 more sheets: Figure2_S2_i, Figure2_S2_j, Figure_3_c, Figure_3_e, Figure_3_f, Figure3_S1a, Figure3_S1_b, Figure3_S1_c, Figure3_S1_d, Figure3_S1e, Figure3_S1_f, Figure3_S1_g, Figure3_S1_h, Figure_4_b, Figure_4_d, Figure_4_f, Figure4_S1_a, Figure4_S1_b, Figure4_S1_c, Figure4_S1_e …]
